# Supplementary material
Source: MDPI journal article supplement (https://www.mdpi.com/2073-4395/14/3/635)
Supplement: s1 [file s1]

Archive with 15 entries (15 files):
- Figure S1-S4.pdf
- Table S1.xlsx
- Table S10.xlsx
- Table S11.xlsx
- Table S12.xlsx
- Table S13.xlsx
- Table S14.xlsx
- Table S2.xlsx
- Table S3.xlsx
- Table S4.xlsx
- Table S5.xlsx
- Table S6.xlsx
- Table S7.xlsx
- Table S8.xlsx
- Table S9.xlsx
