# Supplementary material
Source: MDPI journal article supplement (https://www.mdpi.com/2073-4395/14/3/635)
Supplement: s1 [file s1 › Table S1.xlsx]

## Sheet: Sheet1
Table S1.	Sequencing data preprocessing statistical results
Sample	Clean_Reads_Percent	Raw_Base	Clean_Base	Clean_Base_Percent	GC_Content	>Q20	>Q30
AIP1	0.9774	16831199100(16.83G)	16399029226(16.4G)	0.9743	0.6256	0.9708	0.9207
AIP2	0.9767	15068101500(15.07G)	14672611356(14.67G)	0.9738	0.6242	0.9702	0.9187
AIP3	0.9762	16567871400(16.57G)	16122232459(16.12G)	0.9731	0.6221	0.9713	0.9214
AIP4	0.9768	15298873800(15.3G)	14897948361(14.9G)	0.9738	0.6265	0.9721	0.9229
AMP1	0.9781	16600281000(16.6G)	16191829960(16.19G)	0.9754	0.6231	0.9707	0.92
AMP2	0.976	14554608900(14.55G)	14167687566(14.17G)	0.9734	0.6233	0.964	0.9051
AMP3	0.976	14372506500(14.37G)	13987380706(13.99G)	0.9732	0.6251	0.9692	0.9167
AMP4	0.9779	15322965600(15.32G)	14939235595(14.94G)	0.975	0.6208	0.9708	0.92
BIP1	0.978	15906442200(15.91G)	15500737401(15.5G)	0.9745	0.6194	0.9707	0.9206
BIP2	0.9775	15808787700(15.81G)	15400718619(15.4G)	0.9742	0.6114	0.9707	0.9198
BIP3	0.9778	16456909800(16.46G)	16045421130(16.05G)	0.975	0.6221	0.9707	0.9202
BIP4	0.9783	17560698600(17.56G)	17100642350(17.1G)	0.9738	0.6104	0.9724	0.9241
BMP1	0.979	16936296000(16.94G)	16518826099(16.52G)	0.9754	0.6184	0.9709	0.9207
BMP2	0.979	17075794800(17.08G)	16654165852(16.65G)	0.9753	0.5922	0.9707	0.9197
BMP3	0.9821	16103159400(16.1G)	15764388257(15.76G)	0.979	0.6229	0.9713	0.9218
BMP4	0.9771	16111194300(16.11G)	15683394927(15.68G)	0.9734	0.6181	0.9715	0.9219
CIP1	0.9764	15465651900(15.47G)	15053081426(15.05G)	0.9733	0.6177	0.9715	0.922
CIP2	0.9749	14076985200(14.08G)	13680677426(13.68G)	0.9718	0.6159	0.9702	0.9185
CIP3	0.976	13798985400(13.8G)	13425334727(13.43G)	0.9729	0.613	0.9696	0.9173
CIP4	0.9792	14276473800(14.28G)	13927156536(13.93G)	0.9755	0.604	0.9716	0.9214
CMP1	0.9761	14855894400(14.86G)	14458810619(14.46G)	0.9733	0.6135	0.971	0.9204
CMP2	0.9766	14869316700(14.87G)	14473983582(14.47G)	0.9734	0.574	0.9692	0.9159
CMP3	0.9761	14091512100(14.09G)	13709588669(13.71G)	0.9729	0.5961	0.9696	0.9174
CMP4	0.9743	13735395300(13.74G)	13332117165(13.33G)	0.9706	0.6156	0.97	0.9184
