# Supplementary material
Source: MDPI journal article supplement (https://www.mdpi.com/2073-4395/14/3/635)
Supplement: s1 [file s1 › Table S2.xlsx]

## Sheet: Sheet1
Table S2.	Statistical analysis of gene prediction results for 24 samples
Sample	Total_Size	ORF_Num	Mean_Len	Max_Len	Min_Len	N50
AIP1	511576329	1837986	278.335	7257	201	260
AIP2	474937431	1635607	290.374	12333	201	277
AIP3	515490765	1815959	283.867	13614	201	266
AIP4	497460375	1750244	284.223	5487	201	268
AMP1	594354834	2009116	295.829	6003	201	285
AMP2	412451730	1417993	290.87	5382	201	278
AMP3	488403621	1648750	296.227	6870	201	286
AMP4	511328424	1767215	289.341	7626	201	276
BIP1	466076163	1667122	279.569	7662	201	257
BIP2	434993280	1560485	278.755	12330	201	257
BIP3	484850727	1756047	276.104	7881	201	256
BIP4	532868487	1935779	275.273	14055	201	252
BMP1	528110043	1883214	280.43	8208	201	260
BMP2	495228990	1770772	279.668	6741	201	260
BMP3	528056244	1864388	283.233	6741	201	265
BMP4	515050182	1846098	278.994	6810	201	259
CIP1	351166947	1312259	267.605	22734	201	244
CIP2	266583675	1012271	263.352	24696	201	242
CIP3	262819911	980002	268.183	12555	201	243
CIP4	278323788	1048843	265.363	21462	201	243
CMP1	408348786	1415952	288.392	13386	201	269
CMP2	328655007	1182053	278.037	8796	201	260
CMP3	349610130	1236047	282.845	5178	201	263
CMP4	328115946	1185669	276.735	8796	201	254
