# Supplementary material
Source: MDPI journal article supplement (https://www.mdpi.com/2073-4395/14/3/635)
Supplement: s1 [file s1 › Table S3.xlsx]

## Sheet: Sheet1
Table S3.	Statistical summary of non redundant gene annotation results
Database	NR	swissport	GO	eggNOG	KEGG	CAZy	CARD	PHI	VFDB
annotated_num	15350280	6644118	6485325	11789284	1786065	147943	30177	1016324	975441
annotated_ratio	0.8589	0.3718	0.3629	0.6597	0.0999	0.0083	0.0017	0.0569	0.0546
