# Supplementary material
Source: MDPI journal article supplement (https://www.mdpi.com/2073-4395/14/3/635)
Supplement: s1 [file s1 › Table S4.xlsx]

## Sheet: Sheet1
Table S4.	Relative species abundance of 24 samples at the phylum level
phylum	AIP1	AIP2	AIP3	AIP4	AMP1	AMP2	AMP3	AMP4	BIP1	BIP2	BIP3	BIP4	BMP1	BMP2	BMP3	BMP4	CIP1	CIP2	CIP3	CIP4	CMP1	CMP2	CMP3	CMP4
Abditibacteriota	2.26004e-05	2.69406e-05	2.91604e-05	3.37977e-05	3.91308e-05	3.41317e-05	3.88391e-05	2.59602e-05	2.28656e-05	2.46291e-05	2.54395e-05	2.423e-05	2.60124e-05	2.14731e-05	2.58134e-05	2.72463e-05	1.87773e-05	2.13817e-05	1.85146e-05	2.23879e-05	2.37734e-05	2.00087e-05	1.96391e-05	1.93745e-05
Acidobacteria	0.247797	0.227783	0.23633	0.23713	0.234797	0.235179	0.236188	0.226814	0.227596	0.230637	0.250277	0.235419	0.214231	0.189049	0.22744	0.215673	0.250928	0.237443	0.24172	0.222369	0.255885	0.214257	0.211145	0.242782
Actinobacteria	0.0461283	0.0531796	0.0559927	0.0541368	0.0650186	0.0694916	0.0674846	0.076149	0.0580048	0.0647782	0.0583061	0.0578122	0.057233	0.057957	0.0567388	0.0595127	0.0557955	0.0588488	0.0614154	0.057556	0.0506622	0.0435737	0.0552794	0.0497577
Aquificae	4.29135e-05	3.5148e-05	3.96271e-05	4.19125e-05	4.24943e-05	4.24801e-05	4.2207e-05	3.56198e-05	3.33421e-05	3.58511e-05	3.70677e-05	3.55314e-05	3.9873e-05	3.82439e-05	3.9815e-05	3.89473e-05	3.18913e-05	2.09856e-05	3.40446e-05	2.81339e-05	4.24364e-05	2.79405e-05	3.12583e-05	3.4391e-05
Armatimonadetes	0.00217388	0.00264713	0.00234468	0.00280936	0.00313689	0.00344004	0.00307111	0.00289243	0.00294317	0.00305493	0.00310896	0.00305117	0.00281096	0.00228373	0.00354228	0.00278926	0.00180719	0.00161854	0.00163395	0.00152193	0.00269685	0.00235358	0.00268484	0.00307616
Artverviricota	1.90464e-05	1.22695e-05	4.457e-05	5.17113e-06	3.63477e-05	2.39187e-05	6.83291e-06	8.91464e-05	0.000122359	0.000198018	4.79072e-05	0.000224878	0.000127282	0.000433508	7.86192e-05	0.000125627	0.000216025	0.000283771	0.000333266	0.000500815	0.000124335	0.000834003	0.000513108	0.000182568
Ascomycota	0.00014896	0.000166437	0.000187738	0.000151404	0.000206399	0.00017597	0.000325525	0.000252336	0.000250489	0.000299617	0.000247729	0.000316409	0.000224838	0.000552979	0.000193218	0.000251866	0.000267141	0.000366731	0.000355225	0.00052921	0.000206304	0.000766586	0.000522992	0.000231067
Bacteroidetes	0.0306893	0.0283296	0.0386736	0.029684	0.0278861	0.0312609	0.0311351	0.0253901	0.032944	0.0354229	0.0342643	0.0344788	0.0385479	0.0349381	0.0391173	0.0369428	0.0402759	0.0355048	0.035613	0.0351271	0.0434925	0.0300057	0.0293916	0.0346027
Balneolaeota	0.000100552	9.264e-05	9.48838e-05	9.59955e-05	8.94073e-05	9.14288e-05	9.13105e-05	8.13139e-05	0.000113176	0.000117301	0.000124002	0.000110024	0.000112364	9.99285e-05	0.00010943	0.000106076	0.000112985	0.000106873	9.83546e-05	0.000114638	0.000125909	0.000107383	0.000101354	0.000131033
Basidiomycota	0.000715823	0.000745926	0.000650225	0.00068651	0.000709569	0.000691019	0.000622097	0.000775771	0.000820954	0.000955708	0.000780146	0.000845483	0.000860398	0.00106547	0.0007145	0.00087207	0.00021125	0.000305277	0.000301663	0.000440094	0.000197157	0.000737948	0.000449508	0.000199018
Blastocladiomycota	1.21391e-07	6.49183e-07	2.79853e-07	3.67912e-07	8.24607e-07	1.41811e-06	2.84141e-07	3.06733e-06	3.64231e-06	2.70026e-06	1.61667e-06	6.91486e-06	2.69737e-06	7.81101e-06	2.72214e-06	3.44445e-06	5.99086e-06	5.85993e-06	7.08894e-06	9.34943e-06	1.65844e-06	1.66246e-05	1.03038e-05	3.08325e-06
Caldiserica	7.27961e-06	1.52341e-05	9.31427e-06	1.25456e-05	7.6324e-06	8.09881e-06	4.72555e-06	7.63934e-06	1.04446e-05	1.05142e-05	1.03713e-05	9.6496e-06	1.66771e-05	1.02904e-05	1.26692e-05	1.36353e-05	1.07522e-05	6.98631e-06	1.11958e-05	8.26682e-06	6.11858e-06	6.8161e-06	5.12432e-06	6.83702e-06
Calditrichaeota	0.000352069	0.00031085	0.000363131	0.000359834	0.000331119	0.000335621	0.000320239	0.000285921	0.000332266	0.00033484	0.000380302	0.000348609	0.000339959	0.00030193	0.000366919	0.000336561	0.000370823	0.000358676	0.000358749	0.000308863	0.000379414	0.000311205	0.000341561	0.000359756
Candidatus_Abawacabacteria	1.81718e-06	2.85927e-06	2.8881e-06	2.89477e-06	2.63243e-06	2.37628e-06	1.89184e-06	1.68338e-06	3.97854e-06	4.71777e-06	2.27409e-06	2.76863e-06	3.66607e-06	2.66332e-06	3.08752e-06	2.72297e-06	3.17819e-06	1.71213e-06	2.79271e-06	2.3004e-06	4.02387e-06	2.85769e-06	2.95766e-06	2.90137e-06
Candidatus_Abyssubacteria	2.40084e-05	2.9943e-05	3.1588e-05	2.91327e-05	2.97865e-05	2.94835e-05	3.08694e-05	2.7545e-05	2.2895e-05	2.22347e-05	2.55347e-05	2.61834e-05	3.39227e-05	2.62185e-05	2.73648e-05	2.9904e-05	2.47053e-05	2.24303e-05	2.05593e-05	2.05472e-05	2.33453e-05	2.33514e-05	2.5441e-05	2.24707e-05
Candidatus_Adlerbacteria	4.44504e-06	5.82031e-06	6.66432e-06	7.64366e-06	9.61655e-06	1.26302e-05	8.53963e-06	1.05973e-05	7.8716e-06	8.89539e-06	6.52122e-06	4.60416e-06	4.45943e-06	5.91507e-06	7.85829e-06	6.62856e-06	8.94996e-06	5.94921e-06	8.72016e-06	8.19776e-06	3.42571e-06	3.98294e-06	4.83873e-06	4.62597e-06
Candidatus_Aenigmarchaeota	1.45589e-05	1.51451e-05	1.54947e-05	1.92425e-05	1.45427e-05	1.76084e-05	1.68734e-05	1.24116e-05	1.51936e-05	1.86947e-05	1.73551e-05	1.70942e-05	1.35305e-05	1.30462e-05	1.54708e-05	1.84858e-05	1.07192e-05	1.02414e-05	9.80602e-06	9.34727e-06	1.76201e-05	1.18903e-05	1.20948e-05	1.31925e-05
Candidatus_Aerophobetes	1.18121e-05	1.05151e-05	1.28086e-05	1.2198e-05	1.01192e-05	1.08448e-05	1.16807e-05	8.71738e-06	1.2262e-05	1.0634e-05	9.44603e-06	8.96351e-06	1.05637e-05	1.25092e-05	1.11369e-05	1.03537e-05	1.23689e-05	1.10008e-05	1.00129e-05	1.0836e-05	1.41215e-05	1.36148e-05	9.75901e-06	1.27222e-05
Candidatus_Altiarchaeota	9.44505e-06	9.24406e-06	1.01048e-05	8.39364e-06	1.06128e-05	6.73446e-06	8.17372e-06	7.71138e-06	8.66207e-06	1.13233e-05	9.93163e-06	1.18344e-05	8.58252e-06	9.70227e-06	1.0644e-05	9.10635e-06	7.04454e-06	8.57253e-06	6.96334e-06	9.05818e-06	1.13036e-05	1.10183e-05	1.07571e-05	1.06589e-05
Candidatus_Amesbacteria	1.70991e-05	3.26571e-05	1.50946e-05	3.74075e-05	1.23918e-05	1.33267e-05	1.49244e-05	1.30048e-05	2.48022e-05	3.31398e-05	2.57483e-05	2.77783e-05	3.21445e-05	2.38883e-05	3.39815e-05	2.92736e-05	1.95437e-05	1.8544e-05	1.467e-05	1.72264e-05	3.14052e-05	3.32434e-05	2.7094e-05	3.71091e-05
Candidatus_Aminicenantes	0.00029964	0.000261302	0.000296963	0.000296493	0.000281112	0.000269418	0.000260238	0.0002748	0.000276945	0.000279557	0.000321197	0.000292507	0.000260709	0.000235319	0.000291572	0.000279706	0.000303684	0.000286653	0.000329382	0.000258929	0.000309149	0.000258935	0.000253392	0.000284565
Candidatus_Andersenbacteria	6.41534e-06	5.26703e-06	3.93622e-06	1.28074e-05	3.33052e-06	3.81258e-06	5.01844e-06	4.18361e-06	1.14272e-05	8.69719e-06	8.44686e-06	1.00895e-05	8.85577e-06	5.43715e-06	7.68244e-06	9.36757e-06	5.1446e-06	6.52324e-06	6.40331e-06	3.0758e-06	7.36328e-06	6.63494e-06	8.19759e-06	8.37848e-06
Candidatus_Atribacteria	1.81712e-05	2.24195e-05	2.50614e-05	2.12409e-05	2.079e-05	1.89637e-05	1.94785e-05	2.05295e-05	2.32647e-05	2.62102e-05	2.33483e-05	2.45866e-05	2.76996e-05	2.19362e-05	2.83018e-05	2.41344e-05	1.87592e-05	2.38526e-05	2.30871e-05	2.09409e-05	2.49284e-05	1.85729e-05	2.28062e-05	2.58188e-05
Candidatus_Aureabacteria	1.7798e-06	3.3207e-06	3.5788e-06	2.70739e-06	2.89753e-06	2.94593e-06	2.48428e-06	3.82564e-06	3.11319e-06	3.58372e-06	4.14625e-06	3.1791e-06	2.87342e-06	1.80771e-06	3.8125e-06	1.90579e-06	4.07675e-06	2.97328e-06	4.15114e-06	2.90729e-06	3.42471e-06	3.10388e-06	4.56431e-06	3.46697e-06
Candidatus_Azambacteria	5.42627e-06	8.80698e-06	5.94769e-06	7.08824e-06	4.00218e-06	4.93165e-06	5.34345e-06	6.11878e-06	6.67283e-06	6.98565e-06	8.17563e-06	7.04209e-06	7.6302e-06	6.96199e-06	7.32702e-06	9.31512e-06	5.22806e-06	3.44397e-06	6.89013e-06	4.51012e-06	7.54723e-06	6.38235e-06	6.03921e-06	5.26524e-06
Candidatus_Bathyarchaeota	0.000146112	0.000132737	0.000135788	0.000146041	0.00014478	0.000136488	0.000120575	0.000132385	0.000138779	0.000157505	0.000168855	0.000150179	0.000142215	0.000131612	0.000138278	0.000149389	0.000145316	0.000175682	0.000157586	0.000126439	0.000158224	0.000134631	0.000128205	0.000153667
Candidatus_Beckwithbacteria	4.77011e-06	1.56304e-05	5.21714e-06	1.8087e-05	8.36748e-06	7.6588e-06	8.02756e-06	6.60732e-06	6.85291e-06	1.08557e-05	8.07752e-06	5.83737e-06	1.02843e-05	1.02514e-05	7.44457e-06	8.47402e-06	4.42059e-06	5.49896e-06	5.89054e-06	6.17387e-06	9.09357e-06	1.38056e-05	9.16836e-06	1.46594e-05
Candidatus_Berkelbacteria	7.04262e-05	7.98464e-05	7.47172e-05	0.000268845	0.000100871	0.000124701	0.000109544	9.28025e-05	2.71398e-05	4.08801e-05	5.96844e-05	3.02757e-05	3.23366e-05	3.80284e-05	4.00666e-05	3.35817e-05	1.78465e-05	1.48951e-05	4.7098e-05	1.32574e-05	2.18663e-05	2.23768e-05	2.31833e-05	2.10681e-05
Candidatus_Bipolaricaulota	4.37126e-05	4.17214e-05	4.02431e-05	4.16423e-05	4.05239e-05	4.34422e-05	4.0781e-05	4.30877e-05	4.34117e-05	4.69103e-05	4.5046e-05	4.51599e-05	5.06746e-05	4.04361e-05	4.99317e-05	4.64932e-05	4.73671e-05	3.72632e-05	4.31721e-05	3.67841e-05	4.54054e-05	4.46017e-05	3.66346e-05	4.19325e-05
Candidatus_Blackburnbacteria	9.01506e-06	1.26572e-05	7.60073e-06	1.88009e-05	5.16833e-06	6.16407e-06	3.6186e-06	5.53599e-06	1.02952e-05	1.25267e-05	9.25343e-06	8.10395e-06	7.64847e-06	8.92494e-06	8.07638e-06	7.51139e-06	7.50241e-06	7.10474e-06	8.24087e-06	5.21078e-06	7.68608e-06	7.8512e-06	6.67093e-06	7.53017e-06
Candidatus_Brennerbacteria	3.82133e-07	4.46169e-07	3.83003e-07	1.01119e-06	8.61444e-08	5.06707e-07	6.68637e-07	4.43812e-07	8.65154e-07	9.38448e-07	4.07027e-07	1.78628e-07	1.29998e-06	3.70878e-07	1.07298e-06	8.30495e-07	1.35776e-06	9.23967e-07	4.02657e-07	1.27556e-06	5.04163e-07	1.80157e-06	1.38632e-06	1.37947e-06
Candidatus_Buchananbacteria	4.22247e-06	6.2975e-06	6.26541e-06	6.60795e-06	5.26891e-06	6.25361e-06	5.11395e-06	3.50266e-06	7.12283e-06	9.86879e-06	7.43321e-06	8.42054e-06	8.68019e-06	5.55994e-06	7.42448e-06	9.24759e-06	7.50527e-06	5.62282e-06	7.05696e-06	7.14318e-06	7.99708e-06	1.07704e-05	9.74407e-06	1.04067e-05
Candidatus_Calescamantes	6.61204e-07	1.6531e-06	1.80709e-06	1.39912e-06	1.53156e-06	1.28869e-06	6.36887e-07	1.16751e-06	1.9164e-06	6.50143e-07	1.40034e-06	1.46634e-06	2.14132e-06	1.72494e-06	1.66127e-06	2.06606e-06	1.2929e-06	1.12044e-06	5.52436e-07	1.24534e-07	4.02483e-06	4.84479e-07	8.43493e-07	9.41929e-07
Candidatus_Campbellbacteria	9.3611e-07	4.82727e-07	1.34627e-06	9.24983e-07	1.51814e-06	1.70419e-06	5.24042e-07	7.2487e-07	2.39931e-06	1.63473e-06	2.01433e-06	2.04303e-06	1.68974e-06	1.07237e-06	2.16981e-06	2.10397e-06	1.16574e-06	8.258e-07	2.43182e-06	8.67732e-07	2.17417e-06	5.11273e-07	1.12157e-06	1.38038e-06
Candidatus_Cerribacteria	1.20741e-05	1.44221e-05	1.67739e-05	1.20111e-05	1.25082e-05	1.28768e-05	1.26941e-05	1.08219e-05	6.65235e-06	8.08564e-06	7.22067e-06	6.23709e-06	9.23005e-06	8.91341e-06	1.07554e-05	1.09117e-05	2.46694e-06	2.87104e-06	4.59007e-06	2.15433e-06	5.85946e-06	4.62389e-06	5.39668e-06	3.51973e-06
Candidatus_Chisholmbacteria	2.39299e-06	2.72894e-06	1.59637e-06	3.33945e-06	1.00393e-06	1.60165e-06	1.81463e-06	1.76819e-06	2.4065e-06	4.91822e-06	2.60805e-06	2.27208e-06	3.48665e-06	2.48573e-06	4.77641e-06	3.44318e-06	3.3804e-06	2.54784e-06	1.70887e-06	3.21438e-06	2.92339e-06	4.20365e-06	4.16701e-06	3.13775e-06
Candidatus_Cloacimonetes	0.000167162	0.000143342	0.000155262	0.000160081	0.000154015	0.000149777	0.000146896	0.000138771	0.000159608	0.000162909	0.000171862	0.000169002	0.000150911	0.000151509	0.000164203	0.000158057	0.000196955	0.000168667	0.000192863	0.000187596	0.000228828	0.000181039	0.000185117	0.000202663
Candidatus_Coatesbacteria	5.08505e-06	8.35796e-06	4.20112e-06	9.36883e-06	5.00356e-06	5.64301e-06	5.98452e-06	4.66271e-06	3.77914e-06	3.9762e-06	3.69803e-06	5.11138e-06	4.69224e-06	5.53333e-06	7.33823e-06	6.59534e-06	2.34805e-06	1.86504e-06	2.68356e-06	1.89525e-06	3.7195e-06	2.30177e-06	3.03498e-06	5.48755e-06
Candidatus_Collierbacteria	7.03105e-06	1.122e-05	7.36923e-06	1.22023e-05	6.52815e-06	9.97491e-06	5.10191e-06	3.34308e-06	1.1789e-05	1.47455e-05	7.89781e-06	1.06433e-05	8.89325e-06	9.78794e-06	9.0319e-06	1.65861e-05	7.95e-06	6.68246e-06	1.18603e-05	7.12108e-06	8.95329e-06	9.42978e-06	7.87146e-06	8.03209e-06
Candidatus_Colwellbacteria	5.47654e-06	3.78312e-06	4.39627e-06	7.18767e-06	1.06448e-06	2.90545e-06	2.38579e-06	2.52721e-06	4.3974e-06	8.06216e-06	8.05689e-06	4.48455e-06	5.64834e-06	3.59997e-06	7.72867e-06	4.17295e-06	2.00554e-06	1.26169e-06	3.37646e-06	3.21801e-06	5.14656e-06	4.11038e-06	3.71522e-06	6.37283e-06
Candidatus_Cryosericota	5.93673e-06	6.19354e-06	3.47931e-06	4.44078e-06	5.57679e-06	5.44693e-06	5.23499e-06	4.70728e-06	5.73509e-06	5.37802e-06	6.67393e-06	5.90105e-06	6.26914e-06	5.77869e-06	5.88556e-06	3.99905e-06	2.75201e-06	3.37915e-06	3.43118e-06	3.435e-06	5.55756e-06	3.69644e-06	4.23826e-06	4.56231e-06
Candidatus_Curtissbacteria	1.68594e-05	2.34383e-05	1.50736e-05	4.05112e-05	1.1439e-05	1.23334e-05	1.15212e-05	1.1324e-05	1.97882e-05	2.61247e-05	1.43248e-05	2.01585e-05	2.25745e-05	1.47029e-05	1.88686e-05	1.73307e-05	1.36334e-05	1.20743e-05	1.22201e-05	1.39216e-05	2.3577e-05	2.18193e-05	1.96722e-05	2.43924e-05
Candidatus_Dadabacteria	0.00016579	0.000162236	0.000180963	0.000161795	0.000151936	0.000140673	0.000140044	0.000128053	0.000161848	0.0001478	0.000186125	0.000151934	0.000158611	0.000130833	0.000169078	0.000150069	0.000179056	0.000159002	0.000172364	0.000160433	0.000196113	0.000162673	0.000152713	0.000180816
Candidatus_Daviesbacteria	4.39409e-05	9.0837e-05	3.59225e-05	0.000143577	4.09146e-05	4.77572e-05	4.29813e-05	3.3064e-05	5.69546e-05	0.0001078	6.79021e-05	6.29234e-05	7.6299e-05	7.27981e-05	7.52923e-05	6.80054e-05	7.06861e-05	6.97427e-05	7.77764e-05	6.17886e-05	6.6272e-05	8.71621e-05	6.25392e-05	9.95764e-05
Candidatus_Delongbacteria	2.69819e-06	1.14663e-06	1.8273e-06	1.26423e-06	1.69836e-06	1.98551e-06	1.43672e-06	1.09349e-06	1.94306e-06	2.1748e-06	2.71247e-06	2.61844e-06	2.7343e-06	1.8554e-06	1.68141e-06	1.59825e-06	2.32497e-06	8.04232e-07	1.71149e-06	3.45247e-06	3.09345e-06	1.87426e-06	1.86524e-06	9.06297e-07
Candidatus_Desantisbacteria	3.91762e-06	4.88087e-06	4.45653e-06	4.77088e-06	4.71086e-06	6.70699e-06	4.85598e-06	3.52362e-06	3.72712e-06	7.09614e-06	8.0256e-06	6.31018e-06	4.64984e-06	3.68177e-06	5.77085e-06	6.97656e-06	3.40237e-06	3.25812e-06	7.52908e-06	4.18678e-06	6.55631e-06	5.06893e-06	4.99532e-06	4.8099e-06
Candidatus_Diapherotrites	1.74705e-06	2.7133e-06	1.88182e-06	1.99821e-06	2.07427e-06	1.39438e-06	1.50273e-06	1.47027e-06	4.04044e-06	2.20368e-06	3.52802e-06	3.26593e-06	1.91939e-06	1.87206e-06	3.84245e-06	3.33798e-06	2.17306e-06	2.952e-06	3.44994e-06	3.20917e-06	3.0171e-06	2.9485e-06	2.21376e-06	2.92861e-06
Candidatus_Dormibacteraeota	9.91581e-05	0.000112317	8.58162e-05	0.000106606	0.000142808	0.000143747	0.000140158	0.000146005	0.000122398	0.000119916	0.000104498	0.000111196	0.000124316	0.000117305	0.000122234	0.000111098	9.90221e-05	7.98731e-05	8.36734e-05	8.4335e-05	7.09062e-05	6.9939e-05	7.59922e-05	7.50735e-05
Candidatus_Doudnabacteria	2.50018e-05	2.533e-05	2.48062e-05	3.94709e-05	2.24942e-05	1.93059e-05	1.69046e-05	1.8986e-05	2.66681e-05	3.10916e-05	2.77138e-05	2.3495e-05	3.18479e-05	2.78219e-05	3.06842e-05	2.77308e-05	2.48569e-05	1.80116e-05	2.44404e-05	1.86083e-05	3.00875e-05	2.81076e-05	1.94978e-05	2.22532e-05
Candidatus_Edwardsbacteria	4.7102e-06	3.52375e-06	5.2707e-06	5.15586e-06	5.12862e-06	4.10394e-06	6.10709e-06	2.76866e-06	3.79349e-06	4.07511e-06	4.32891e-06	4.05871e-06	3.94958e-06	3.37883e-06	3.7102e-06	3.26282e-06	4.18132e-06	2.11842e-06	6.9227e-06	1.81872e-06	3.32559e-06	2.64608e-06	4.81902e-06	5.17114e-06
Candidatus_Eisenbacteria	0.00869647	0.00599551	0.00889813	0.00843858	0.00607236	0.00635778	0.00404002	0.005161	0.00674812	0.00724554	0.0074665	0.00866391	0.00861368	0.00621702	0.00951917	0.00927254	0.00585306	0.00441889	0.00508506	0.00405733	0.00425801	0.0039097	0.00423118	0.00550801
Candidatus_Eremiobacteraeota	4.53887e-05	0.000103801	5.52132e-05	4.90048e-05	5.60632e-05	5.82249e-05	6.10176e-05	5.29821e-05	3.43583e-05	3.55939e-05	3.44641e-05	3.52524e-05	4.19043e-05	4.51969e-05	4.46267e-05	4.49597e-05	3.08006e-05	2.74668e-05	3.413e-05	2.63408e-05	3.33817e-05	2.78461e-05	3.39337e-05	3.66321e-05
Candidatus_Falkowbacteria	1.22262e-05	1.56107e-05	1.26146e-05	1.86413e-05	1.35802e-05	1.40665e-05	1.10789e-05	1.12202e-05	1.5162e-05	1.80991e-05	1.72761e-05	1.65072e-05	2.17133e-05	2.08333e-05	2.14684e-05	2.47984e-05	1.61096e-05	1.39394e-05	1.15393e-05	1.44278e-05	2.26151e-05	1.89579e-05	2.22993e-05	2.06372e-05
Candidatus_Fermentibacteria	1.04082e-05	8.03782e-06	1.45394e-05	9.58228e-06	9.29086e-06	1.09994e-05	7.1308e-06	9.68629e-06	1.01758e-05	1.37755e-05	1.20527e-05	1.28379e-05	1.32061e-05	1.03775e-05	1.28921e-05	1.32623e-05	1.20583e-05	1.08398e-05	1.04092e-05	7.96596e-06	1.14737e-05	1.10428e-05	9.60572e-06	1.14178e-05
Candidatus_Firestonebacteria	8.29118e-06	7.67499e-06	9.15144e-06	6.7393e-06	6.22209e-06	5.69026e-06	7.16276e-06	5.34925e-06	7.15312e-06	8.4325e-06	7.80367e-06	8.19447e-06	8.92978e-06	5.35809e-06	7.69097e-06	6.98064e-06	7.36577e-06	6.89413e-06	6.11552e-06	1.21312e-05	7.71836e-06	5.15926e-06	4.40261e-06	7.57471e-06
Candidatus_Fischerbacteria	5.94814e-06	5.05367e-06	7.94558e-06	7.25009e-06	7.51427e-06	5.7339e-06	6.6954e-06	5.43779e-06	8.71431e-06	8.3493e-06	8.70268e-06	1.04523e-05	5.48234e-06	5.6297e-06	7.0909e-06	5.52956e-06	8.46013e-06	5.77689e-06	4.00429e-05	6.54728e-06	7.08347e-06	5.59452e-06	7.17117e-06	9.65634e-06
Candidatus_Fraserbacteria	2.2499e-05	2.66235e-05	2.0925e-05	2.475e-05	2.1039e-05	2.24203e-05	2.26667e-05	2.09933e-05	2.2722e-05	2.33894e-05	2.14071e-05	2.21436e-05	2.87318e-05	2.31376e-05	2.55727e-05	2.44129e-05	1.8104e-05	1.68749e-05	2.6624e-05	1.88549e-05	2.05921e-05	1.75286e-05	1.96396e-05	1.81198e-05
Candidatus_Geothermarchaeota	8.25018e-07	1.78327e-07	8.67366e-07	1.11884e-07	4.84977e-07	5.12984e-07	4.31433e-07	8.56837e-07	7.69794e-07	4.90118e-07	1.10116e-06	5.86812e-07	1.25157e-07	4.28778e-07	3.62565e-07	3.6219e-07	5.31677e-07	9.72159e-07	8.13556e-07	8.3297e-07	6.74548e-07	1.84258e-07	5.58584e-07	9.60753e-07
Candidatus_Giovannonibacteria	1.16782e-05	1.23596e-05	1.02161e-05	1.68341e-05	1.16741e-05	1.04736e-05	7.99946e-06	9.56966e-06	1.19547e-05	1.23683e-05	1.02414e-05	8.95781e-06	1.72923e-05	1.2123e-05	1.86287e-05	1.27096e-05	6.73447e-06	5.90915e-06	1.21507e-05	9.21085e-06	1.40766e-05	1.295e-05	1.57372e-05	1.0879e-05
Candidatus_Glassbacteria	9.05383e-06	9.50583e-06	8.22352e-06	1.04878e-05	1.13316e-05	9.27234e-06	5.93169e-06	7.72384e-06	9.01581e-06	8.33219e-06	7.68996e-06	8.83859e-06	1.03843e-05	8.67071e-06	1.14777e-05	1.0332e-05	1.63356e-05	1.37112e-05	1.43458e-05	1.20373e-05	1.49719e-05	9.8277e-06	9.76631e-06	1.40984e-05
Candidatus_Goldbacteria	6.81252e-07	1.08531e-06	1.41528e-06	1.77186e-06	4.39133e-07	5.58056e-07	7.42919e-07	1.09703e-06	9.27513e-07	2.27814e-06	5.58478e-07	1.73933e-06	9.08782e-07	1.06951e-06	7.27822e-07	7.84474e-07	1.31414e-06	9.36474e-07	1.15696e-06	4.09578e-07	3.70767e-07	1.95974e-07	4.51297e-07	7.9926e-07
Candidatus_Gottesmanbacteria	6.61669e-05	0.000106944	4.62041e-05	0.000129912	5.05628e-05	5.68406e-05	4.55447e-05	4.73946e-05	7.77915e-05	0.000111187	8.16727e-05	8.42001e-05	0.000103172	8.38701e-05	0.000103366	9.03751e-05	5.58975e-05	4.58413e-05	4.44233e-05	5.52357e-05	8.39661e-05	9.96446e-05	8.35133e-05	0.000106709
Candidatus_Gracilibacteria	4.24816e-05	4.44546e-05	3.54999e-05	4.57263e-05	4.3037e-05	4.69965e-05	4.36699e-05	4.38833e-05	5.56995e-05	4.63027e-05	5.77473e-05	5.30211e-05	5.87545e-05	5.21043e-05	4.52009e-05	4.94181e-05	5.25735e-05	5.41232e-05	4.73603e-05	4.3484e-05	5.20931e-05	4.72152e-05	5.39122e-05	4.44964e-05
Candidatus_Handelsmanbacteria	9.79276e-05	0.000104595	0.000104096	0.000115207	9.34773e-05	0.000103049	9.27818e-05	9.5843e-05	9.44663e-05	0.000100403	0.000109701	0.000106734	0.000103369	0.000101849	0.000109005	0.00010648	9.37972e-05	8.82338e-05	8.92407e-05	9.26556e-05	0.00010973	8.42635e-05	9.43774e-05	9.06552e-05
Candidatus_Harrisonbacteria	3.21042e-06	5.45518e-06	3.4684e-06	4.66786e-06	2.4538e-06	2.97887e-06	1.91503e-06	2.27683e-06	4.30927e-06	5.62508e-06	5.26586e-06	4.0393e-06	5.09424e-06	2.01171e-06	4.08081e-06	5.31358e-06	2.10788e-06	1.50504e-06	7.76025e-06	2.46705e-06	2.85386e-06	3.85082e-06	3.33273e-06	4.86362e-06
Candidatus_Heimdallarchaeota	6.60935e-06	4.39539e-06	6.31887e-06	7.57198e-06	4.28573e-06	5.13922e-06	6.61377e-06	3.75336e-06	6.09057e-06	5.36766e-06	6.44575e-06	3.44871e-06	7.46849e-06	4.87543e-06	5.3417e-06	4.75498e-06	4.37131e-06	1.96801e-06	4.42042e-06	3.31345e-06	1.13663e-05	4.40746e-06	4.55506e-06	5.77215e-06
Candidatus_Helarchaeota	2.72842e-06	2.96839e-06	9.79045e-07	1.97326e-06	2.43005e-06	2.32723e-06	1.82779e-06	3.47768e-06	2.04296e-06	7.20463e-07	3.57042e-06	8.40571e-07	1.60775e-06	2.59641e-06	2.11407e-06	1.17735e-06	4.65647e-07	1.53174e-06	8.35927e-07	1.11541e-06	1.53373e-06	9.71017e-07	1.55013e-06	1.47719e-06
Candidatus_Huberarchaea	0	2.60045e-07	3.27747e-07	0	1.49569e-07	0	0	0	8.46058e-08	0	4.94255e-07	1.99308e-07	7.6968e-08	1.94052e-07	7.89729e-08	0	1.39135e-07	9.67163e-07	0	0	0	2.26464e-07	1.23652e-07	0
Candidatus_Hydrogenedentes	0.000151937	0.000171406	0.000157038	0.000173144	0.00016281	0.000160594	0.000151996	0.000148579	0.000143584	0.000149331	0.000153985	0.000150155	0.000157161	0.000141038	0.000166234	0.000170135	0.000130307	0.00011646	0.000130557	0.000110436	0.000126169	0.00011024	0.000113372	0.000127794
Candidatus_Hydrothermae	7.53294e-07	6.84174e-07	2.53828e-06	2.47236e-06	1.28024e-06	2.11759e-06	2.50081e-06	2.30966e-06	1.65174e-06	1.54839e-06	1.36454e-06	1.28824e-06	1.5075e-06	1.75163e-06	9.21644e-07	2.42041e-06	4.13691e-06	2.54535e-06	3.30467e-06	2.4475e-06	1.14486e-06	1.3884e-06	1.24445e-06	2.21145e-06
Candidatus_Hydrothermarchaeota	9.7272e-07	6.56277e-07	2.61982e-07	7.53403e-07	5.43539e-07	6.95916e-07	4.1748e-07	5.68481e-07	9.23836e-07	1.64358e-06	3.53451e-07	1.33306e-07	3.24346e-07	3.9952e-07	3.4751e-07	5.45754e-07	1.94964e-07	2.10355e-07	2.11143e-06	1.0003e-06	7.76738e-07	8.92697e-07	1.39498e-06	4.52841e-07
Candidatus_Jacksonbacteria	7.14456e-07	2.77109e-06	1.07099e-06	1.78282e-06	1.2376e-06	8.63732e-07	1.06636e-06	8.28492e-07	1.83229e-06	2.50111e-06	3.1492e-06	1.08785e-06	1.80035e-06	1.51919e-06	2.72073e-06	1.13485e-06	5.46383e-07	2.8937e-07	9.76143e-07	3.04856e-07	1.96615e-06	1.35466e-06	1.98571e-06	2.03197e-06
Candidatus_Jorgensenbacteria	3.99113e-06	4.34078e-06	3.08508e-06	6.66678e-06	3.03621e-06	3.95078e-06	5.71984e-06	2.19932e-06	3.48093e-06	3.45959e-06	3.19148e-06	3.17282e-06	4.32869e-06	5.391e-06	4.87082e-06	3.99836e-06	2.44254e-06	1.7923e-06	3.82888e-06	1.93809e-06	5.69621e-06	3.26841e-06	3.07922e-06	4.55645e-06
Candidatus_Kaiserbacteria	3.26539e-05	3.94655e-05	2.65341e-05	3.66451e-05	2.86533e-05	3.17238e-05	2.59535e-05	2.72377e-05	3.33868e-05	4.37033e-05	3.46212e-05	3.77151e-05	4.73308e-05	3.68681e-05	4.00586e-05	3.92331e-05	4.02835e-05	2.88331e-05	4.32594e-05	3.13819e-05	3.51023e-05	3.45064e-05	3.55222e-05	3.95125e-05
Candidatus_Kapabacteria	1.33947e-05	1.72988e-05	1.72103e-05	1.60494e-05	1.42373e-05	1.55766e-05	2.01017e-05	1.63414e-05	1.09738e-05	1.39464e-05	1.44764e-05	1.23906e-05	1.67559e-05	1.16576e-05	1.72361e-05	1.25046e-05	1.43116e-05	1.4447e-05	1.35884e-05	1.38316e-05	1.73293e-05	1.57816e-05	1.43251e-05	1.49091e-05
Candidatus_Kerfeldbacteria	8.22077e-06	1.01592e-05	7.9575e-06	1.26941e-05	6.77335e-06	1.0212e-05	8.85089e-06	7.63618e-06	9.8512e-06	1.10818e-05	7.99696e-06	1.04678e-05	9.00098e-06	6.80677e-06	1.09663e-05	7.55715e-06	9.60848e-06	8.24106e-06	9.65693e-06	1.02111e-05	1.14817e-05	1.19547e-05	1.01849e-05	1.11263e-05
Candidatus_Komeilibacteria	4.16273e-06	4.20389e-06	2.41078e-06	6.19367e-06	2.36831e-06	2.53458e-06	1.83216e-06	2.72772e-06	3.53307e-06	5.11925e-06	4.19474e-06	2.54707e-06	4.10282e-06	1.97627e-06	3.2924e-06	4.91848e-06	6.11156e-06	3.9654e-06	4.07731e-06	3.57461e-06	5.33042e-06	7.09209e-06	8.1979e-06	5.90351e-06
Candidatus_Korarchaeota	2.9596e-06	5.75815e-06	2.41777e-06	4.19032e-06	5.22653e-06	4.00293e-06	3.4958e-06	4.99899e-06	4.70389e-06	5.97655e-06	4.0752e-06	6.66169e-06	7.45425e-06	7.48942e-06	6.18957e-06	5.76815e-06	6.45371e-06	5.26994e-06	3.25675e-06	6.09625e-06	7.19418e-06	4.84925e-06	2.82356e-06	4.22525e-06
Candidatus_Kryptonia	2.28672e-05	2.47575e-05	2.617e-05	2.30654e-05	2.60029e-05	2.28413e-05	2.21144e-05	1.8227e-05	2.16705e-05	2.16266e-05	2.07848e-05	2.01645e-05	1.76558e-05	1.83777e-05	2.27531e-05	1.97924e-05	1.62539e-05	1.94236e-05	2.41895e-05	1.52069e-05	1.89289e-05	2.17531e-05	1.8522e-05	2.17653e-05
Candidatus_Kuenenbacteria	1.70285e-06	1.07552e-06	1.80277e-06	1.8747e-06	2.40924e-06	2.20048e-06	2.00526e-06	1.18869e-06	2.30157e-06	2.3462e-06	2.16981e-06	2.26607e-06	2.46334e-06	2.73229e-06	2.78042e-06	2.42233e-06	1.89424e-06	1.89422e-06	2.37076e-06	3.96277e-06	2.45949e-06	4.59142e-06	3.80493e-06	4.24478e-06
Candidatus_Latescibacteria	0.000273603	0.000239396	0.00040987	0.000279551	0.000230361	0.000234395	0.000220428	0.000212001	0.000258762	0.000265544	0.000306153	0.000292817	0.000308565	0.000234467	0.000332104	0.000318337	0.000243304	0.000227219	0.000216515	0.00020483	0.000257919	0.000222338	0.000242796	0.000271354
Candidatus_Levybacteria	0.000366695	0.00105857	0.000260307	0.00107957	0.000283769	0.000348279	0.000286573	0.000257674	0.000508881	0.000819123	0.000553348	0.00057613	0.000764594	0.000598063	0.000725712	0.000598525	0.000435917	0.000622474	0.000300981	0.000512979	0.000932286	0.00149321	0.00094015	0.00161794
Candidatus_Lindowbacteria	1.60051e-05	1.99329e-05	1.8531e-05	2.00257e-05	1.53893e-05	2.03404e-05	2.07661e-05	1.80732e-05	1.69631e-05	1.51782e-05	1.89132e-05	1.55234e-05	2.18077e-05	1.69469e-05	2.41644e-05	2.06053e-05	1.66268e-05	1.32533e-05	1.03421e-05	1.37017e-05	1.4243e-05	1.12933e-05	1.92356e-05	1.65646e-05
Candidatus_Liptonbacteria	7.40244e-06	8.30976e-06	6.55092e-06	7.79476e-06	5.56161e-06	6.05196e-06	3.37844e-06	5.83575e-06	7.15317e-06	1.06252e-05	8.45833e-06	5.83299e-06	7.56213e-06	8.34457e-06	9.12367e-06	8.73745e-06	3.2387e-06	5.37289e-06	6.57886e-06	4.27661e-06	7.88363e-06	6.94592e-06	8.09681e-06	7.62749e-06
Candidatus_Lloydbacteria	4.85762e-06	4.54328e-06	4.85271e-06	4.40821e-06	2.64763e-06	2.37951e-06	1.56287e-06	1.62299e-06	6.97146e-06	7.23886e-06	5.52236e-06	5.9853e-06	6.59936e-06	5.07729e-06	6.65279e-06	4.65657e-06	7.5854e-06	3.64429e-06	4.46412e-06	4.11065e-06	6.52799e-06	5.66821e-06	3.75267e-06	5.23319e-06
Candidatus_Lokiarchaeota	1.16938e-05	2.08471e-05	1.11756e-05	1.94758e-05	1.05196e-05	1.29037e-05	9.97883e-06	9.31871e-06	1.00856e-05	1.25299e-05	1.05711e-05	8.52491e-06	1.11577e-05	8.33807e-06	9.86303e-06	8.9397e-06	8.2197e-06	8.37538e-06	8.96671e-06	7.78884e-06	9.12925e-06	8.54765e-06	8.23738e-06	6.97648e-06
Candidatus_Magasanikbacteria	2.15412e-05	4.37986e-05	2.25647e-05	3.41522e-05	1.86051e-05	1.99114e-05	1.72801e-05	2.09911e-05	2.41083e-05	3.63487e-05	2.97922e-05	2.69724e-05	4.11698e-05	3.20944e-05	2.98575e-05	3.58791e-05	2.53995e-05	2.0685e-05	2.64237e-05	1.64478e-05	3.0622e-05	3.53641e-05	3.0946e-05	2.54473e-05
Candidatus_Margulisbacteria	4.72574e-06	8.24865e-06	7.1557e-06	8.40643e-06	1.01038e-05	1.02218e-05	8.27215e-06	7.29049e-06	5.70705e-06	7.68633e-06	6.11372e-06	5.48305e-06	6.5237e-06	6.95798e-06	8.0271e-06	5.98051e-06	7.38761e-06	7.84113e-06	6.40696e-06	4.78572e-06	5.64925e-06	4.08185e-06	4.45011e-06	6.7293e-06
Candidatus_Marinimicrobia	0.000131345	0.000121984	0.000128837	0.000135288	0.000113333	0.000118543	0.00012001	0.000103349	0.000144148	0.000140618	0.00014035	0.000144904	0.000138416	0.000118179	0.000138725	0.000125372	0.000158454	0.000169051	0.00017312	0.000152588	0.000168318	0.000123523	0.0001331	0.000148958
Candidatus_Marsarchaeota	5.06677e-07	3.83179e-07	1.93765e-07	6.61327e-07	8.70867e-07	1.28744e-06	2.66578e-07	4.76225e-07	6.76232e-07	1.78713e-06	5.40669e-07	3.55344e-07	1.05614e-06	0	0	1.54023e-07	3.6242e-07	1.48369e-06	6.25592e-07	3.13825e-07	2.917e-07	1.07566e-06	3.09129e-07	0
Candidatus_Mcinerneyibacteriota	0	0	2.69502e-07	0	3.88881e-07	0	0	0	2.43724e-07	4.19019e-07	2.21665e-07	8.40455e-08	7.53128e-08	0	7.04562e-08	7.15276e-08	0	0	0	0	0	0	0	0
Candidatus_Melainabacteria	7.31089e-05	9.15893e-05	8.84573e-05	8.44559e-05	7.51636e-05	7.4217e-05	7.67883e-05	7.2784e-05	9.67624e-05	6.87531e-05	7.47778e-05	0.000138929	8.41675e-05	6.57125e-05	7.65316e-05	8.20295e-05	7.72347e-05	7.15058e-05	6.36207e-05	5.86166e-05	5.8357e-05	5.2644e-05	5.65032e-05	6.88807e-05
Candidatus_Micrarchaeota	3.3482e-06	5.05214e-06	5.22006e-06	7.27177e-06	5.14061e-06	4.77031e-06	3.61593e-06	5.37646e-06	5.81987e-06	5.34887e-06	6.76536e-06	6.92011e-06	5.54243e-06	4.13187e-06	5.2753e-06	5.65426e-06	6.91449e-06	4.38243e-06	8.98545e-06	3.06681e-06	6.93161e-06	5.59171e-06	4.14632e-06	2.84912e-06
Candidatus_Microgenomates	3.18043e-05	8.65729e-05	2.53935e-05	0.000116401	3.15747e-05	4.75069e-05	3.11573e-05	2.97308e-05	3.40456e-05	6.14266e-05	4.58618e-05	4.22017e-05	4.91101e-05	4.55045e-05	4.86211e-05	4.46484e-05	2.60616e-05	2.65648e-05	2.44609e-05	2.79253e-05	3.71443e-05	4.89462e-05	3.77883e-05	5.66327e-05
Candidatus_Moranbacteria	4.55679e-05	6.63045e-05	4.71641e-05	8.33059e-05	3.91968e-05	3.76238e-05	3.6336e-05	3.66937e-05	5.00271e-05	6.24559e-05	4.84563e-05	5.19912e-05	6.20497e-05	5.2195e-05	6.32715e-05	5.69507e-05	4.46823e-05	3.27349e-05	3.81782e-05	3.91943e-05	5.72802e-05	6.33507e-05	5.91129e-05	7.1337e-05
Candidatus_Muirbacteria	6.96561e-07	5.5888e-07	4.76576e-07	2.15738e-07	3.49894e-07	1.42267e-07	8.38431e-08	0	3.84115e-07	4.15667e-07	4.23404e-08	0	2.57798e-07	1.40327e-08	6.0391e-08	0	6.81202e-07	1.8472e-07	1.15747e-06	1.79007e-06	2.40531e-06	7.65472e-07	1.04392e-06	2.78058e-07
Candidatus_Nealsonbacteria	5.18163e-05	5.66317e-05	6.13694e-05	6.64204e-05	5.30376e-05	5.46713e-05	5.44528e-05	4.92824e-05	4.80968e-05	5.35787e-05	5.81136e-05	5.00273e-05	5.06143e-05	4.97797e-05	5.95418e-05	5.17294e-05	3.72542e-05	3.65597e-05	8.81412e-05	3.10941e-05	5.05249e-05	3.72126e-05	3.65277e-05	3.62945e-05
Candidatus_Niyogibacteria	2.42132e-06	2.44296e-06	2.27632e-06	1.74097e-06	2.00415e-06	9.3674e-07	5.73898e-07	1.32293e-06	1.59842e-06	2.08861e-06	1.36746e-06	1.49179e-06	3.09552e-06	1.80628e-06	2.58093e-06	1.53863e-06	1.12319e-06	1.37703e-06	2.18769e-06	8.32996e-07	9.14432e-07	1.24763e-06	1.06316e-06	1.38687e-06
Candidatus_Nomurabacteria	2.34997e-05	2.93453e-05	1.9975e-05	3.02023e-05	1.97381e-05	2.57337e-05	1.71802e-05	2.39968e-05	2.39834e-05	2.8975e-05	2.09737e-05	2.63616e-05	3.25557e-05	2.53713e-05	2.74021e-05	2.98235e-05	2.36177e-05	1.44502e-05	2.00911e-05	2.09412e-05	3.02153e-05	3.32221e-05	2.94677e-05	2.80499e-05
Candidatus_Odinarchaeota	1.13304e-06	4.29395e-07	4.69818e-07	5.28884e-07	2.34007e-07	8.2675e-07	3.32271e-07	4.89219e-07	1.08836e-06	1.84336e-06	2.25403e-06	2.08584e-06	1.92746e-06	1.27236e-06	1.08482e-06	1.05058e-06	1.81781e-06	1.76963e-06	1.75719e-06	1.37739e-06	1.49742e-06	1.15282e-06	1.32972e-06	1.01069e-06
Candidatus_Omnitrophica	0.000190936	0.000232896	0.000206883	0.00023521	0.000210191	0.000203609	0.000199048	0.000191652	0.000200822	0.000219884	0.000219224	0.000217773	0.000244428	0.00020996	0.00024753	0.000240014	0.000205001	0.000189785	0.000209633	0.00019991	0.000196093	0.000169895	0.000162136	0.00018966
Candidatus_Pacebacteria	1.39122e-05	2.14956e-05	1.58846e-05	2.94372e-05	7.501e-06	8.10946e-06	6.85538e-06	7.75841e-06	1.62544e-05	2.57438e-05	2.00937e-05	1.77834e-05	1.71801e-05	1.51247e-05	2.12873e-05	1.76961e-05	1.50873e-05	1.35137e-05	1.82353e-05	1.3517e-05	1.95818e-05	2.04503e-05	1.76674e-05	2.04659e-05
Candidatus_Parcubacteria	6.36887e-05	8.2054e-05	5.76536e-05	8.84486e-05	5.72454e-05	6.33223e-05	5.75201e-05	5.33829e-05	7.4576e-05	8.69761e-05	8.17615e-05	7.48061e-05	9.4232e-05	6.68671e-05	8.16524e-05	8.29394e-05	6.67694e-05	6.47378e-05	6.956e-05	5.8607e-05	7.50812e-05	6.99715e-05	7.14695e-05	8.25561e-05
Candidatus_Parvarchaeota	3.2371e-07	5.55596e-07	1.84105e-07	4.47535e-07	0	0	9.62643e-08	7.89755e-08	2.8068e-07	0	1.72377e-07	0	8.64703e-08	3.57465e-07	8.87226e-08	0	2.29163e-07	0	0	2.46137e-07	9.33719e-07	6.03666e-07	6.69278e-07	4.0346e-07
Candidatus_Peregrinibacteria	2.48084e-05	2.79719e-05	2.84167e-05	4.23153e-05	2.42851e-05	2.68074e-05	1.98434e-05	2.28864e-05	3.30136e-05	4.1291e-05	3.53475e-05	3.08096e-05	2.90023e-05	2.90943e-05	3.1823e-05	3.06669e-05	2.52696e-05	2.51793e-05	3.13174e-05	2.48796e-05	2.83247e-05	2.63811e-05	2.52655e-05	3.30254e-05
Candidatus_Poribacteria	0.000158448	0.000176432	0.000187442	0.000180826	0.000171637	0.000168978	0.000178967	0.000160907	0.000178757	0.00017802	0.000206061	0.000184294	0.000183591	0.00015793	0.000182695	0.000184853	0.000162726	0.000156951	0.000170526	0.000154372	0.000175973	0.00015259	0.000148448	0.000171462
Candidatus_Portnoybacteria	5.79067e-06	8.85586e-06	6.42628e-06	9.91023e-06	3.99061e-06	3.94108e-06	5.42638e-06	6.24578e-06	3.94369e-06	6.51336e-06	6.09058e-06	3.70377e-06	6.61819e-06	5.89682e-06	5.35645e-06	6.66794e-06	5.47445e-06	2.04159e-06	7.05589e-06	5.98955e-06	4.87601e-06	7.20904e-06	6.34293e-06	6.21008e-06
Candidatus_Raymondbacteria	5.7094e-06	6.53296e-06	7.50382e-06	4.82578e-06	5.27595e-06	3.34594e-06	5.3059e-06	7.27974e-06	3.90175e-06	3.74694e-06	2.86854e-06	5.63785e-06	3.56046e-06	3.01705e-06	7.82847e-06	5.0489e-06	3.67602e-06	2.21891e-06	4.35595e-06	4.37934e-06	5.11272e-06	3.67711e-06	4.90564e-06	5.42623e-06
Candidatus_Riflebacteria	2.34221e-05	1.88445e-05	1.81119e-05	3.41428e-05	2.3544e-05	2.4784e-05	2.26775e-05	1.81256e-05	2.16901e-05	2.16144e-05	2.11344e-05	1.93351e-05	2.03028e-05	1.85094e-05	2.1861e-05	1.98698e-05	1.75938e-05	1.76068e-05	1.40405e-05	1.57873e-05	2.08319e-05	1.98975e-05	1.80725e-05	2.61794e-05
Candidatus_Roizmanbacteria	7.64917e-05	0.00014331	6.59448e-05	0.00021375	6.48317e-05	7.51033e-05	6.18217e-05	5.39517e-05	0.000100018	0.000145956	0.000117575	0.000108827	0.000115902	9.99253e-05	0.000115898	0.000110654	7.57266e-05	7.39334e-05	6.88912e-05	7.1383e-05	0.000128358	0.000154907	0.000126267	0.000168848
Candidatus_Rokubacteria	0.033098	0.0225457	0.0234391	0.0244538	0.0168813	0.017132	0.0175197	0.0162249	0.020911	0.0188311	0.0269941	0.0228714	0.021917	0.0189486	0.0219174	0.0215015	0.0226506	0.0199538	0.0246633	0.0203087	0.0314098	0.0236663	0.0257843	0.0245253
Candidatus_Ryanbacteria	8.75272e-06	5.98851e-06	5.67742e-06	8.88419e-06	7.59102e-06	4.81889e-06	5.54796e-06	5.31778e-06	7.5673e-06	1.06307e-05	8.84164e-06	6.62146e-06	8.76963e-06	8.72762e-06	1.16988e-05	9.51132e-06	5.36264e-06	8.43455e-06	8.23415e-06	4.12628e-06	8.54315e-06	4.56354e-06	5.62363e-06	8.04537e-06
Candidatus_Saccharibacteria	0.00127934	0.00110022	0.00108803	0.00144312	0.000412985	0.000628993	0.000418949	0.000469309	0.0029712	0.00379827	0.00276304	0.00268387	0.00258098	0.0014209	0.00263054	0.00204537	0.00129472	0.00120056	0.00163285	0.00129643	0.00243879	0.00237253	0.00221016	0.00228218
Candidatus_Schekmanbacteria	1.76775e-05	2.0447e-05	2.15059e-05	2.42491e-05	2.26892e-05	1.94419e-05	1.70523e-05	1.75311e-05	1.84615e-05	1.88096e-05	1.94827e-05	1.78072e-05	1.76476e-05	1.5303e-05	2.05074e-05	1.70478e-05	2.4901e-05	1.76878e-05	2.61072e-05	2.40965e-05	2.13788e-05	1.98598e-05	1.752e-05	2.08903e-05
Candidatus_Shapirobacteria	8.16286e-06	1.49986e-05	7.30051e-06	1.70652e-05	5.50048e-06	5.99354e-06	4.56312e-06	4.85075e-06	1.19756e-05	1.61619e-05	1.23235e-05	1.13124e-05	1.43219e-05	1.0965e-05	1.34228e-05	1.01202e-05	7.36429e-06	6.60268e-06	8.51826e-06	4.8929e-06	1.2036e-05	1.4864e-05	1.05555e-05	1.35274e-05
Candidatus_Spechtbacteria	8.8801e-07	7.81575e-07	3.53401e-06	1.23603e-06	2.02159e-06	1.07056e-06	7.58178e-07	8.32272e-07	1.3674e-06	1.78009e-06	1.51841e-06	1.93446e-06	2.38199e-06	8.04226e-07	2.28167e-06	2.11438e-06	2.13779e-06	6.87531e-07	3.14457e-06	1.04871e-06	1.17565e-06	1.33832e-06	1.16842e-06	1.8885e-06
Candidatus_Staskawiczbacteria	8.93919e-06	1.21109e-05	6.77543e-06	1.15871e-05	7.76908e-06	8.99717e-06	7.89604e-06	5.52042e-06	1.09119e-05	1.07371e-05	1.21371e-05	9.97799e-06	1.15536e-05	9.99197e-06	1.14006e-05	1.36318e-05	6.59196e-06	7.29871e-06	6.75904e-06	6.19966e-06	9.03495e-06	8.47566e-06	8.83709e-06	1.33937e-05
Candidatus_Sumerlaeota	7.69334e-05	8.91808e-05	8.09968e-05	8.73669e-05	8.02682e-05	8.62858e-05	8.63548e-05	8.16129e-05	6.81777e-05	7.62203e-05	7.38712e-05	8.12195e-05	7.41237e-05	7.34797e-05	7.76736e-05	8.80268e-05	5.99768e-05	6.15135e-05	6.4019e-05	6.6851e-05	6.23489e-05	5.53554e-05	5.76332e-05	6.3711e-05
Candidatus_Sungbacteria	8.27964e-06	1.02922e-05	6.91344e-06	7.14655e-06	6.12821e-06	6.13768e-06	6.20117e-06	3.81366e-06	8.11131e-06	1.29087e-05	9.80625e-06	9.10605e-06	1.03067e-05	7.5012e-06	1.26123e-05	8.29223e-06	5.7056e-06	5.62495e-06	9.49815e-06	5.57515e-06	8.49642e-06	5.95299e-06	5.69894e-06	6.30998e-06
Candidatus_Tagabacteria	1.08076e-06	4.98002e-07	6.34901e-07	1.3509e-06	1.22643e-06	1.83761e-07	4.31734e-07	3.10667e-07	9.68372e-07	5.19904e-07	1.77332e-07	1.52898e-07	9.42447e-07	9.10735e-07	9.45422e-07	1.6772e-07	7.59915e-07	1.39303e-07	6.958e-07	3.90173e-07	1.05734e-06	9.92612e-07	7.7094e-07	1.73109e-07
Candidatus_Taylorbacteria	1.66473e-05	2.00858e-05	2.0977e-05	2.46368e-05	1.1999e-05	1.54124e-05	1.39273e-05	1.33547e-05	1.77624e-05	2.04067e-05	2.05044e-05	2.05884e-05	8.48656e-05	2.92454e-05	3.01171e-05	3.12933e-05	2.07611e-05	1.32289e-05	2.09556e-05	1.87347e-05	2.57794e-05	2.37455e-05	2.08204e-05	2.27996e-05
Candidatus_Tectomicrobia	0.000256628	0.000222938	0.000242904	0.000246435	0.000208127	0.000187293	0.000195994	0.000177174	0.000213318	0.000199717	0.000241123	0.000228619	0.000223295	0.000187269	0.000227535	0.00021299	0.000242976	0.00023012	0.000212884	0.000219827	0.000275725	0.000206102	0.00021219	0.000207519
Candidatus_Terrybacteria	4.15306e-06	4.78078e-06	5.68079e-06	7.08208e-06	3.27595e-06	4.28603e-06	3.24735e-06	2.23624e-06	5.19342e-06	3.83341e-06	3.9614e-06	4.9715e-06	3.16123e-06	2.90604e-06	5.41452e-06	4.41447e-06	4.06491e-06	4.18915e-06	4.24864e-06	5.24998e-06	5.19601e-06	2.66291e-06	4.55974e-06	2.92342e-06
Candidatus_Thorarchaeota	1.43687e-05	1.66849e-05	1.41931e-05	1.70468e-05	1.62993e-05	1.30843e-05	9.80087e-06	1.01052e-05	1.5762e-05	1.66793e-05	1.61518e-05	1.49619e-05	1.85878e-05	1.39948e-05	1.56605e-05	1.59509e-05	1.59757e-05	1.56254e-05	9.34483e-06	1.20665e-05	1.57879e-05	1.65187e-05	2.34733e-05	1.86306e-05
Candidatus_Uhrbacteria	2.99381e-05	2.82548e-05	3.12731e-05	3.60191e-05	3.33208e-05	2.81119e-05	2.00452e-05	2.54684e-05	4.13597e-05	5.39016e-05	4.63018e-05	4.00411e-05	4.71826e-05	4.43436e-05	3.91387e-05	5.90455e-05	4.00335e-05	4.1994e-05	3.52401e-05	2.59557e-05	3.38724e-05	3.34383e-05	2.86857e-05	3.43083e-05
Candidatus_Veblenbacteria	1.44673e-06	3.52468e-06	1.08605e-06	2.99393e-06	7.91187e-07	1.58498e-06	1.05085e-06	1.46672e-06	1.32752e-06	1.47231e-06	2.21429e-06	7.83947e-07	1.21886e-06	1.44983e-06	1.33804e-06	2.70268e-06	2.6099e-06	3.04387e-06	2.18175e-06	1.44633e-06	4.1912e-06	5.15991e-06	2.45379e-06	4.33281e-06
Candidatus_Verstraetearchaeota	2.7251e-06	2.12048e-06	3.10659e-06	3.04014e-06	2.06016e-06	3.71425e-06	3.29466e-06	1.35995e-06	2.1172e-06	1.91028e-06	3.91487e-06	4.91161e-06	3.1481e-06	3.02032e-06	2.43169e-06	4.53375e-06	4.40598e-06	3.64839e-06	4.56241e-06	4.33505e-06	3.97383e-06	3.09816e-06	3.10874e-06	4.39579e-06
Candidatus_Vogelbacteria	2.2592e-06	1.65383e-06	2.8195e-06	2.48399e-06	2.09676e-06	2.25236e-06	1.25644e-06	6.21988e-07	2.31312e-06	4.65072e-06	2.9261e-06	2.42814e-06	3.41226e-06	2.30752e-06	3.97257e-06	3.55062e-06	1.19726e-06	1.26652e-06	5.84846e-06	1.40682e-06	2.99385e-06	3.34176e-06	2.91632e-06	1.82585e-06
Candidatus_Wallbacteria	3.58209e-06	4.17636e-06	3.73899e-06	3.51524e-06	4.94802e-06	5.24337e-06	3.83231e-06	3.53982e-06	3.61378e-06	4.60363e-06	2.9809e-06	3.91875e-06	3.96606e-06	4.58387e-06	2.19876e-06	4.31319e-06	2.9206e-06	1.491e-06	4.02852e-06	2.45235e-06	3.81544e-06	2.97693e-06	3.61642e-06	1.46266e-06
Candidatus_Wildermuthbacteria	6.7985e-06	8.30213e-06	5.31102e-06	8.51126e-06	5.33471e-06	6.36577e-06	5.67499e-06	4.76278e-06	6.77994e-06	6.7387e-06	7.71127e-06	6.52265e-06	9.18301e-06	6.33308e-06	9.01572e-06	4.17436e-06	5.0445e-06	5.04674e-06	8.41083e-06	5.66798e-06	9.27892e-06	7.92064e-06	8.54029e-06	7.33168e-06
Candidatus_Wirthbacteria	1.59267e-06	2.28948e-06	6.99331e-07	2.04361e-06	1.54045e-06	1.7917e-06	8.12567e-07	1.33245e-06	1.21519e-06	1.70216e-06	1.14271e-06	4.96247e-07	7.73488e-07	1.13629e-06	1.16405e-06	1.33935e-06	1.84986e-07	5.22388e-07	3.75261e-07	9.68595e-08	5.80257e-07	7.73582e-08	7.74252e-07	4.14264e-07
Candidatus_Woesearchaeota	2.40421e-05	2.96532e-05	2.51608e-05	3.12135e-05	1.96162e-05	2.54964e-05	2.46647e-05	2.22493e-05	2.90615e-05	3.11274e-05	3.50133e-05	3.28876e-05	3.6204e-05	2.37951e-05	3.29256e-05	3.1448e-05	2.36149e-05	2.4417e-05	2.32531e-05	2.28475e-05	3.00212e-05	2.61391e-05	2.24561e-05	2.88932e-05
Candidatus_Woesebacteria	5.79746e-05	8.6693e-05	5.1204e-05	9.88923e-05	4.12429e-05	4.05711e-05	3.61435e-05	3.70641e-05	0.000211416	0.000233551	0.000190085	0.000215775	0.00014624	0.000103411	0.000202929	0.000125536	7.12494e-05	5.30297e-05	6.22199e-05	5.41565e-05	8.08178e-05	8.95466e-05	7.24926e-05	9.35799e-05
Candidatus_Wolfebacteria	1.01671e-05	9.39123e-06	1.04382e-05	1.57628e-05	8.51986e-06	9.77472e-06	8.1122e-06	8.48525e-06	9.33117e-06	9.75614e-06	1.08009e-05	9.21752e-06	9.50012e-06	7.5974e-06	1.08905e-05	1.31022e-05	5.86473e-06	5.59308e-06	6.80315e-06	9.21946e-06	8.72675e-06	8.22848e-06	6.86659e-06	6.949e-06
Candidatus_Woykebacteria	7.82681e-06	1.51829e-05	1.25372e-05	1.71172e-05	7.9609e-06	9.00951e-06	9.83639e-06	9.38715e-06	1.60046e-05	2.38731e-05	1.80634e-05	2.11822e-05	1.52041e-05	1.20195e-05	1.91319e-05	1.75418e-05	1.1937e-05	1.45788e-05	1.18933e-05	1.22977e-05	2.0289e-05	2.28598e-05	1.91302e-05	1.98647e-05
Candidatus_Yanofskybacteria	1.95653e-05	2.21481e-05	1.92699e-05	2.48521e-05	1.94344e-05	2.53202e-05	2.04941e-05	1.89456e-05	2.1598e-05	2.42626e-05	2.26465e-05	2.01196e-05	2.3153e-05	2.13728e-05	2.75588e-05	3.05725e-05	2.29656e-05	2.35215e-05	2.5989e-05	1.92748e-05	2.12071e-05	2.26781e-05	2.11418e-05	2.77208e-05
Candidatus_Yonathbacteria	4.22338e-06	5.06571e-06	5.72792e-06	6.70756e-06	3.36349e-06	4.74991e-06	4.29921e-06	3.05686e-06	6.69043e-06	5.99161e-06	8.58514e-06	5.63083e-06	8.26076e-06	6.48593e-06	7.50139e-06	4.54339e-06	1.6419e-06	3.40872e-06	3.23978e-06	3.53878e-06	7.62632e-06	4.16186e-06	4.95787e-06	3.13404e-06
Candidatus_Zambryskibacteria	1.18126e-05	2.27546e-05	1.53647e-05	1.43639e-05	1.1212e-05	1.15261e-05	1.00272e-05	1.06883e-05	1.61361e-05	1.48178e-05	2.06502e-05	1.61695e-05	2.15497e-05	1.02661e-05	1.68407e-05	1.62103e-05	1.18451e-05	1.13656e-05	1.47403e-05	1.2683e-05	1.21585e-05	1.80777e-05	1.17226e-05	1.47206e-05
Chlamydiae	6.54448e-05	9.5483e-05	7.16907e-05	9.61765e-05	8.33114e-05	7.95409e-05	7.68203e-05	9.41907e-05	7.66438e-05	0.000105551	8.17582e-05	8.33691e-05	0.000301898	0.000436612	0.000179641	0.000350749	6.66962e-05	5.55572e-05	5.00389e-05	5.99059e-05	7.34011e-05	6.27083e-05	5.7139e-05	6.7112e-05
Chlorobi	0.000233719	0.000235866	0.000282067	0.000294838	0.000320245	0.000295635	0.000344734	0.000260134	0.00025845	0.000328183	0.000277031	0.000261162	0.000244069	0.000209638	0.000271559	0.000250191	0.000250026	0.000230217	0.000267866	0.000230978	0.000258866	0.000201532	0.000206238	0.000259252
Chloroflexi	0.0459921	0.0444068	0.0408251	0.045113	0.038584	0.0407585	0.0406843	0.0390333	0.0583074	0.0638458	0.0701978	0.0634424	0.0581758	0.0485338	0.0617766	0.0532116	0.0611858	0.0599841	0.0583565	0.0559821	0.0537041	0.0454006	0.0479175	0.0541766
Chrysiogenetes	8.6306e-06	8.56271e-06	7.78581e-06	9.45098e-06	7.96893e-06	9.73997e-06	7.72496e-06	5.90129e-06	9.02567e-06	5.56278e-06	1.06078e-05	1.01613e-05	8.47358e-06	9.4095e-06	1.22498e-05	7.87516e-06	7.63781e-06	1.16869e-05	6.71178e-06	8.51214e-06	6.13493e-06	7.37513e-06	7.39096e-06	1.01126e-05
Chytridiomycota	7.43993e-06	8.08012e-06	1.4561e-05	6.32306e-06	1.82426e-05	1.06453e-05	9.19244e-06	2.81113e-05	3.06666e-05	3.6857e-05	1.59748e-05	4.4109e-05	2.71307e-05	7.95624e-05	1.8805e-05	2.5558e-05	3.60864e-05	4.62733e-05	5.39612e-05	8.14128e-05	2.37393e-05	0.000145157	9.19097e-05	3.82605e-05
Coprothermobacterota	3.00614e-06	2.53828e-06	3.29544e-06	1.04177e-06	2.45677e-06	1.56773e-06	2.67139e-06	1.97042e-06	1.56317e-06	2.56034e-06	3.02697e-06	2.57189e-06	2.27945e-06	2.0318e-06	2.25262e-06	3.42235e-06	8.66247e-07	1.2891e-06	1.89335e-06	7.71971e-07	1.71792e-06	1.63926e-06	1.69131e-06	1.74933e-06
Crenarchaeota	0.000384465	0.000222444	0.00027548	0.000291855	0.000225763	0.000241947	0.000213178	0.000237022	0.000524464	0.000545398	0.000680052	0.000591663	0.000457767	0.000408783	0.000423325	0.000460409	0.000595651	0.00051003	0.00064376	0.000512021	0.000588977	0.000559635	0.000423846	0.000611202
Cressdnaviricota	0	0	0	0	7.01589e-08	9.52834e-08	0	0	9.34741e-07	3.11846e-07	0	2.12897e-07	8.0358e-07	8.53965e-07	1.40799e-07	0	1.00406e-07	1.16325e-07	3.44704e-07	5.39218e-07	2.36242e-07	1.64898e-06	1.7389e-05	2.68943e-06
Cryptomycota	1.06695e-06	1.7332e-06	2.34776e-06	8.54401e-07	3.90593e-06	1.51638e-06	1.94712e-06	2.95953e-06	4.51484e-06	4.39627e-06	2.68759e-06	7.15431e-06	4.39171e-06	1.16349e-05	3.12078e-06	2.66197e-06	6.38042e-06	8.50529e-06	5.81354e-06	1.28067e-05	6.12372e-06	2.32776e-05	1.71852e-05	4.83925e-06
Cyanobacteria	0.00423401	0.00411691	0.00440605	0.00441925	0.00442351	0.00473858	0.00469253	0.00403574	0.00399546	0.00407921	0.00452332	0.00423549	0.00402682	0.00374509	0.00417686	0.00401639	0.00406508	0.00375235	0.00385126	0.00372589	0.00442446	0.00366137	0.00377131	0.00419706
Deferribacteres	1.23548e-05	1.43781e-05	1.53209e-05	1.39426e-05	9.03516e-06	1.19909e-05	1.15154e-05	1.17976e-05	1.27363e-05	1.64117e-05	1.38857e-05	1.57207e-05	1.38857e-05	1.03283e-05	1.49902e-05	1.50765e-05	1.1562e-05	1.67322e-05	1.52019e-05	1.31282e-05	1.4284e-05	1.16463e-05	1.47228e-05	1.74103e-05
Deinococcus-Thermus	0.000454857	0.000475009	0.000470115	0.000471229	0.000483101	0.000452256	0.000467336	0.000420203	0.000460483	0.000458421	0.000495306	0.000460082	0.000465638	0.000447472	0.000511804	0.000476887	0.000411696	0.000406821	0.000395304	0.000382951	0.000430172	0.000355117	0.00043027	0.000442686
Dictyoglomi	4.29183e-06	4.79104e-06	4.64095e-06	5.46761e-06	4.31104e-06	5.32073e-06	4.98075e-06	4.6429e-06	5.60349e-06	6.20124e-06	6.53628e-06	4.78047e-06	5.53631e-06	5.33158e-06	5.01868e-06	5.28615e-06	1.64486e-06	2.52633e-06	4.96937e-06	2.55157e-06	2.57474e-06	2.34734e-06	3.02183e-06	4.52893e-06
Dividoviricota	0	0	0	0	0	0	0	0	0	0	0	0	0	0	4.92228e-07	0	0	0	0	0	0	0	0	0
Elusimicrobia	0.000251716	0.000336061	0.000304849	0.000294417	0.000289006	0.000281028	0.000260612	0.000280404	0.000447972	0.000478184	0.000443562	0.000420566	0.000572233	0.000423288	0.000711817	0.000478138	0.000660194	0.000431487	0.0004315	0.000519418	0.00046855	0.000298219	0.000261006	0.000287466
Euryarchaeota	0.000671952	0.000655269	0.000686999	0.000729222	0.000667965	0.000673108	0.000643806	0.000628666	0.000687172	0.000751285	0.000862456	0.000775851	0.000732394	0.000662786	0.000748166	0.000722507	0.000699472	0.00068506	0.000688276	0.000645692	0.00077955	0.000644969	0.000631047	0.000737836
Fibrobacteres	5.72385e-05	5.83786e-05	6.35291e-05	7.18246e-05	8.09867e-05	7.65551e-05	7.25709e-05	6.46487e-05	5.25906e-05	6.15997e-05	4.39863e-05	4.86498e-05	6.96927e-05	5.43936e-05	7.188e-05	7.34442e-05	3.19638e-05	3.71807e-05	3.98316e-05	3.30311e-05	3.05359e-05	2.51523e-05	3.78721e-05	3.26978e-05
Firmicutes	0.00419786	0.00381525	0.006116	0.00338627	0.00624344	0.00478747	0.00366309	0.0104334	0.0137599	0.0205792	0.00729514	0.0231699	0.0142099	0.0413028	0.011406	0.0136455	0.0203667	0.0259411	0.0308915	0.0449255	0.0121724	0.0677928	0.0460008	0.0186352
Fusobacteria	6.78286e-06	6.6106e-06	5.38017e-06	8.80491e-06	5.98799e-06	6.16051e-06	5.88645e-06	4.75314e-06	6.28861e-06	8.65972e-06	6.35312e-06	8.60479e-06	4.73411e-06	6.0059e-06	7.62415e-06	6.83964e-06	7.67496e-06	5.73938e-06	6.01642e-06	7.84194e-06	6.97189e-06	7.07508e-06	6.68417e-06	6.10975e-06
Gemmatimonadetes	0.0815384	0.079072	0.0742011	0.0755902	0.081419	0.0834045	0.075996	0.0687712	0.0611169	0.0655783	0.066453	0.0634743	0.073935	0.0714415	0.0787653	0.0750954	0.0555084	0.051325	0.0471079	0.0520379	0.0813277	0.0622365	0.0725738	0.077039
Ignavibacteriae	0.000433868	0.000448432	0.000470497	0.000458326	0.000427655	0.000491049	0.000405	0.000403007	0.000434761	0.00058008	0.000478649	0.000476423	0.000444746	0.00038656	0.000473939	0.000459803	0.000438002	0.000408737	0.000445051	0.000405413	0.000497137	0.00039674	0.000385577	0.000435555
Kiritimatiellaeota	6.7871e-05	7.88141e-05	7.01112e-05	7.10884e-05	7.8111e-05	7.81287e-05	7.79317e-05	7.21451e-05	4.92586e-05	5.83527e-05	6.04774e-05	6.03726e-05	6.53527e-05	5.36744e-05	6.48627e-05	7.1019e-05	4.84941e-05	5.02674e-05	3.74958e-05	4.02009e-05	3.81459e-05	3.94498e-05	3.71753e-05	5.09125e-05
Kitrinoviricota	4.92833e-07	3.19677e-07	0	0	2.26774e-07	0	1.25765e-07	0	6.15102e-07	6.22662e-07	2.62727e-07	3.32287e-07	3.38908e-07	5.75042e-07	2.76411e-07	1.03224e-06	0	3.9626e-07	0	0	1.14153e-07	3.34188e-07	2.97176e-07	6.13816e-07
Lenarviricota	8.49689e-07	2.97099e-07	9.59715e-07	4.45028e-08	2.99291e-07	1.09728e-06	5.50608e-07	1.99846e-06	5.65387e-06	6.38351e-06	2.06179e-06	5.99556e-06	3.42615e-06	1.5697e-05	2.8726e-06	2.41998e-06	6.90255e-06	7.75725e-06	7.83896e-06	1.45295e-05	2.87647e-06	1.97963e-05	1.41055e-05	3.93486e-06
Lentisphaerae	0.000230038	0.000303549	0.000269846	0.000313173	0.000297986	0.000294621	0.000289799	0.000263287	0.000217252	0.000227177	0.00021484	0.000223057	0.000241982	0.000219389	0.000249604	0.000247566	0.000179429	0.000182513	0.000177986	0.000162721	0.000172624	0.000136987	0.00015319	0.000178707
Microsporidia	2.04791e-06	2.52765e-06	3.72118e-06	2.25994e-06	2.89788e-06	2.73471e-06	2.89786e-06	3.43809e-06	3.11065e-06	5.73785e-06	2.11767e-06	5.71105e-06	7.36972e-06	1.77048e-05	4.30849e-06	4.47122e-06	6.25458e-06	6.18101e-06	7.05451e-06	1.38199e-05	1.21546e-05	1.85917e-05	1.12816e-05	4.94018e-06
Mucoromycota	0.000220298	0.000431675	0.000348674	0.000295367	0.000329907	0.000130657	0.000122136	0.00027761	0.00104985	0.0016196	0.000369905	0.000651297	0.000335598	0.000948475	0.000252251	0.000376676	0.000468051	0.000617789	0.00066806	0.00084433	0.000240328	0.00126066	0.000870737	0.000373736
Nanoarchaeota	2.91724e-06	2.82688e-06	2.88525e-06	6.36008e-06	2.08835e-06	3.60562e-06	3.47955e-06	2.73899e-06	5.00854e-06	2.68217e-06	1.61048e-06	4.67793e-06	6.44128e-06	7.09082e-06	7.18951e-06	5.6533e-06	4.72833e-06	3.60213e-06	5.2623e-06	4.36703e-06	4.62436e-06	3.10435e-06	2.35034e-06	4.02322e-06
Negarnaviricota	0	0	0	0	0	0	0	0	0	1.1358e-06	0	0	0	0	0	0	0	0	0	0	0	0	0	0
Nitrospinae	0.000106933	0.000102126	0.000107015	0.000101189	0.000102558	9.23187e-05	9.66596e-05	8.00974e-05	9.88683e-05	9.84791e-05	0.000110342	0.000107714	0.000102268	9.14263e-05	9.91839e-05	9.70273e-05	9.52729e-05	9.79014e-05	0.000110682	9.22251e-05	0.000100764	8.31922e-05	8.94915e-05	9.49582e-05
Nitrospirae	0.00825526	0.00770793	0.00763224	0.00719404	0.00594323	0.00669277	0.00581855	0.00619405	0.00636755	0.0062253	0.00702892	0.006537	0.00768455	0.00714178	0.00695674	0.00760942	0.00663082	0.00559312	0.00634479	0.00584005	0.00937037	0.00771882	0.00774499	0.00843237
Nucleocytoviricota	1.72515e-06	7.32817e-06	2.67236e-06	4.17676e-06	2.77569e-06	2.66747e-06	2.48485e-06	4.03522e-06	2.60783e-06	4.028e-06	4.13953e-06	3.35112e-06	3.72486e-06	6.39013e-06	3.30051e-06	3.39879e-06	3.43892e-06	4.92575e-06	4.46333e-06	4.40055e-06	6.11826e-06	7.39432e-06	3.33498e-06	4.6388e-06
Olpidiomycota	8.24545e-08	0	7.03418e-08	0	0	0	0	7.07799e-08	0	2.20578e-07	0	2.63237e-07	0	3.2037e-07	0	0	0	2.12898e-07	1.06552e-07	4.11015e-07	0	6.69518e-07	6.11977e-07	1.96072e-07
Peploviricota	2.18504e-07	0	0	0	5.95473e-07	1.92949e-07	0	9.37834e-08	1.92478e-07	9.74219e-08	2.82622e-07	0	1.75102e-07	8.48979e-08	0	0	3.74593e-07	2.82089e-07	0	0	1.1031e-07	1.04434e-07	1.08195e-07	1.20007e-07
Phixviricota	0	0	6.11075e-07	3.34474e-07	0	0	0	0	0	0	6.91431e-08	6.39979e-08	0	2.49242e-07	0	0	0	0	0	0	0	0	0	0
Pisuviricota	0	0	0	0	0	0	0	0	0	9.03623e-07	0	0	0	9.84324e-08	0	0	1.41151e-07	0	1.63689e-07	0	0	0	0	0
Planctomycetes	0.0161042	0.0187477	0.0193538	0.0205482	0.019175	0.0184848	0.0175824	0.0168391	0.0148803	0.0165703	0.0159103	0.016007	0.0172384	0.0152649	0.0173877	0.0177109	0.0125287	0.0114994	0.0143375	0.0108955	0.0131727	0.0102399	0.0110391	0.0124554
Preplasmiviricota	1.93275e-06	1.12303e-05	5.49484e-06	5.43001e-06	1.25978e-05	1.46585e-05	9.62259e-06	1.12453e-05	9.60026e-06	4.32567e-06	2.22637e-06	4.858e-06	5.59179e-06	6.77996e-06	2.28072e-06	4.71628e-06	8.4341e-07	5.3347e-06	5.2633e-07	8.74507e-07	1.90926e-05	2.39856e-06	4.37529e-06	6.50168e-06
Proteobacteria	0.2988	0.312629	0.298719	0.297328	0.299293	0.287986	0.310559	0.31159	0.303909	0.255073	0.259799	0.253134	0.280623	0.266848	0.267517	0.279127	0.274228	0.289005	0.268583	0.267113	0.253655	0.223314	0.259047	0.274838
Rhodothermaeota	9.54822e-05	8.97088e-05	0.000107647	0.00010448	0.000106611	9.39925e-05	9.53168e-05	8.6343e-05	9.95384e-05	0.000101578	0.000106912	0.000104603	0.000104834	8.8826e-05	0.000106297	0.000103814	0.000106226	9.5964e-05	9.20285e-05	8.53972e-05	0.000117317	0.000100779	0.000100208	0.000106511
Spirochaetes	0.00020666	0.00025585	0.000248805	0.000247798	0.000219315	0.000221331	0.000228988	0.000196048	0.000220469	0.000225884	0.000240222	0.00023125	0.00026426	0.000211888	0.000256223	0.000248829	0.00023105	0.000216115	0.000209458	0.000196541	0.000228814	0.000177448	0.00018885	0.000216577
Synergistetes	2.47622e-05	2.70072e-05	2.81186e-05	2.80913e-05	2.83536e-05	2.38643e-05	2.81272e-05	2.35544e-05	2.34974e-05	2.30883e-05	2.81725e-05	2.59181e-05	2.33192e-05	2.54844e-05	2.23347e-05	2.67323e-05	2.45064e-05	2.66092e-05	2.04181e-05	2.238e-05	2.40706e-05	1.62977e-05	2.09996e-05	2.57537e-05
Tenericutes	2.18813e-05	2.95957e-05	2.23351e-05	1.71496e-05	2.23183e-05	1.96632e-05	1.76651e-05	2.97064e-05	4.79578e-05	6.34747e-05	3.26686e-05	5.71863e-05	7.13456e-05	0.00203996	2.80767e-05	4.16912e-05	5.01071e-05	6.5548e-05	6.37633e-05	9.29297e-05	3.53e-05	0.000143422	9.99333e-05	4.79201e-05
Thaumarchaeota	0.0136958	0.00927382	0.0106076	0.0107812	0.0136399	0.0158929	0.0137675	0.0134312	0.0128193	0.0130341	0.0169829	0.0155429	0.0126095	0.0127316	0.0105792	0.0130721	0.0143446	0.0132292	0.0162657	0.0142309	0.016615	0.0148814	0.0119902	0.0160621
Thermodesulfobacteria	3.13153e-05	3.58135e-05	3.42874e-05	3.6023e-05	4.11773e-05	3.85472e-05	3.49352e-05	3.11305e-05	2.79468e-05	2.8202e-05	2.83072e-05	2.5827e-05	3.87054e-05	3.15464e-05	3.24102e-05	3.35329e-05	2.59198e-05	2.6383e-05	3.27501e-05	2.13898e-05	2.71155e-05	2.43855e-05	2.32925e-05	2.57034e-05
Thermotogae	2.16603e-05	2.84879e-05	2.80052e-05	2.97356e-05	2.74962e-05	2.34153e-05	2.73859e-05	2.34738e-05	2.46117e-05	2.91353e-05	3.29941e-05	2.67061e-05	2.42299e-05	2.24484e-05	2.34571e-05	2.36914e-05	2.44169e-05	2.54491e-05	2.29787e-05	2.19184e-05	2.07488e-05	1.83952e-05	1.92946e-05	2.06326e-05
Uroviricota	0.000302685	0.000430315	0.000392173	0.000242681	0.000337642	0.000329781	0.00033679	0.000578038	0.000329964	0.000355458	0.000263061	0.000248648	0.000384058	0.000315104	0.000411304	0.000413232	0.000180265	0.000218301	0.000165784	0.000224177	0.00038544	0.000269723	0.000231399	0.000397409
Verrucomicrobia	0.0311121	0.0352761	0.031326	0.0349235	0.032788	0.0324611	0.028884	0.0316794	0.0250816	0.0263159	0.0257994	0.025501	0.0302884	0.027093	0.0282791	0.0324106	0.022674	0.0220828	0.0209333	0.0205584	0.0209732	0.0168114	0.0181999	0.0206038
Zoopagomycota	8.28486e-06	9.01569e-06	9.36658e-06	6.70029e-06	1.48072e-05	7.50011e-06	7.97931e-06	1.54986e-05	2.24513e-05	2.5159e-05	1.29118e-05	2.91767e-05	1.6918e-05	4.68383e-05	1.42371e-05	1.87656e-05	2.67011e-05	2.96923e-05	3.89866e-05	4.71383e-05	2.15656e-05	9.42226e-05	5.06474e-05	1.94919e-05
candidate_division_CPR1	6.48909e-07	1.98011e-06	1.57889e-06	1.5158e-06	1.54495e-06	1.38108e-06	1.38929e-06	9.59985e-07	7.36528e-07	1.50928e-06	1.48776e-06	1.75857e-06	9.31107e-07	2.82095e-06	9.97695e-07	1.90243e-06	2.43699e-06	1.04655e-06	9.51177e-07	1.28607e-06	1.36483e-06	2.82139e-06	1.17792e-06	1.30722e-06
candidate_division_CPR2	6.38558e-06	4.87676e-06	6.28775e-06	9.87058e-06	6.02559e-06	3.93861e-06	3.66257e-06	4.47381e-06	7.0049e-06	1.06369e-05	5.59755e-06	6.55406e-06	7.58135e-06	6.81512e-06	9.35364e-06	9.47744e-06	7.67969e-06	5.47469e-06	7.00062e-06	7.59295e-06	1.595e-05	1.34373e-05	1.60246e-05	1.07193e-05
candidate_division_CPR3	2.78921e-06	4.6385e-06	3.06195e-06	7.70226e-06	2.17161e-06	3.21004e-06	2.73502e-06	2.24799e-06	4.0179e-06	7.16582e-06	7.02557e-06	4.50265e-06	5.94855e-06	3.97441e-06	6.21292e-06	6.12969e-06	3.84113e-06	4.43272e-06	4.81899e-06	4.59085e-06	7.05498e-06	9.20257e-06	5.96743e-06	5.96659e-06
candidate_division_KD3-62	8.06503e-07	1.73001e-06	1.64987e-06	8.36342e-07	2.99389e-06	2.2913e-06	3.57375e-06	3.11721e-06	7.35758e-07	6.16942e-07	1.46187e-06	2.13015e-06	1.87075e-07	1.42257e-06	1.2585e-06	1.72625e-06	2.84381e-06	2.57045e-06	3.68206e-06	1.53728e-06	5.31183e-07	7.90145e-07	1.36019e-06	8.17217e-07
candidate_division_LCP-89	3.49991e-06	1.96606e-06	4.22564e-06	3.21447e-06	2.27923e-06	2.67461e-06	2.9286e-06	1.98861e-06	4.2391e-06	2.84471e-06	1.98218e-06	4.0202e-06	2.08038e-06	3.44316e-06	4.04396e-06	2.38079e-06	4.45478e-06	3.20341e-06	3.49192e-06	1.74134e-06	4.38212e-06	2.88084e-06	2.16224e-06	4.20828e-06
candidate_division_NC10	0.00046364	0.000400329	0.000423494	0.000424126	0.000370021	0.000372659	0.000375565	0.000338011	0.000387377	0.000381912	0.000438837	0.000427771	0.000413168	0.000360389	0.00041115	0.00041378	0.000412954	0.000378944	0.000389571	0.000357553	0.000458811	0.000370417	0.000394644	0.000421315
candidate_division_WOR-3	2.25525e-05	2.02419e-05	2.91595e-05	3.07746e-05	2.17585e-05	2.08141e-05	1.98156e-05	1.98738e-05	2.45006e-05	2.22738e-05	2.91644e-05	2.46106e-05	2.1944e-05	1.90785e-05	2.42154e-05	2.36976e-05	2.37742e-05	2.13069e-05	2.262e-05	2.18578e-05	2.8725e-05	2.5792e-05	2.42131e-05	2.65767e-05
candidate_division_WWE3	2.85039e-05	3.45773e-05	2.3817e-05	4.37718e-05	1.65123e-05	2.44009e-05	2.36474e-05	1.60299e-05	4.68197e-05	4.662e-05	4.40759e-05	4.46159e-05	4.43859e-05	3.31864e-05	5.27797e-05	4.00309e-05	3.49938e-05	2.51394e-05	4.08133e-05	3.14387e-05	4.03684e-05	4.75462e-05	3.85868e-05	4.66448e-05
candidate_division_Zixibacteria	0.000275402	0.000253105	0.000275702	0.000274097	0.000222859	0.000237963	0.000217213	0.000205742	0.000252391	0.000266537	0.000289406	0.00026613	0.000245782	0.000210559	0.000268902	0.000247721	0.000249728	0.000250517	0.000246242	0.000218424	0.000267138	0.000226798	0.000232928	0.00027393
unclassified	0.0125159	0.0121095	0.012309	0.0132387	0.0122989	0.0122211	0.0118233	0.011128	0.0123345	0.0128382	0.0138573	0.0126211	0.0122811	0.0112613	0.0129941	0.0125558	0.0125207	0.0117218	0.0117638	0.0113166	0.0138374	0.0118532	0.0120712	0.0136799
