# Supplementary material
Source: MDPI journal article supplement (https://www.mdpi.com/2073-4395/14/3/635)
Supplement: s1 [file s1 › Table S5.xlsx]

## Sheet: Sheet1
Table S5.	Relative species abundance of 24 samples at the class level
class	AIP1	AIP2	AIP3	AIP4	AMP1	AMP2	AMP3	AMP4	BIP1	BIP2	BIP3	BIP4	BMP1	BMP2	BMP3	BMP4	CIP1	CIP2	CIP3	CIP4	CMP1	CMP2	CMP3	CMP4
Abditibacteria	2.26004e-05	2.69406e-05	2.91604e-05	3.37977e-05	3.91308e-05	3.41317e-05	3.88391e-05	2.59602e-05	2.28656e-05	2.46291e-05	2.54395e-05	2.423e-05	2.60124e-05	2.14731e-05	2.58134e-05	2.72463e-05	1.87773e-05	2.13817e-05	1.85146e-05	2.23879e-05	2.37734e-05	2.00087e-05	1.96391e-05	1.93745e-05
Acidimicrobiia	0.00360704	0.00318196	0.0034089	0.00409002	0.00527932	0.0052269	0.00493592	0.00484999	0.00557976	0.00560656	0.00517598	0.0052869	0.00445734	0.00397284	0.00489701	0.00423645	0.00804272	0.00726757	0.00797426	0.00709933	0.00416256	0.00383021	0.00377848	0.00436341
Acidithiobacillia	0.000109397	0.000107613	0.00010216	0.000116097	0.00010294	0.000102168	0.000101239	0.000106101	0.000103095	0.000102466	0.000107971	0.000107575	0.000109955	9.7242e-05	0.000106915	0.00010706	9.75759e-05	8.85662e-05	0.000101843	9.02717e-05	0.000102351	7.59037e-05	8.5919e-05	9.4352e-05
Acidobacteriia	0.0191893	0.0281875	0.0215472	0.0204987	0.0292752	0.0296006	0.028957	0.0348148	0.0114378	0.0117402	0.0116784	0.0120188	0.0157662	0.0155795	0.0144652	0.0184788	0.00969607	0.00938831	0.00984232	0.00897914	0.00913791	0.00758151	0.00865883	0.00936948
Actinobacteria	0.0365796	0.0428433	0.0465241	0.0434644	0.0519343	0.0562229	0.054405	0.0629123	0.044474	0.0509237	0.0452721	0.0449056	0.0442799	0.0457796	0.0430324	0.046539	0.0403626	0.0451129	0.044766	0.0433828	0.0391425	0.0318608	0.042876	0.0369305
Agaricomycetes	4.36985e-05	7.13016e-05	5.52371e-05	6.47261e-05	5.67726e-05	4.60598e-05	3.93994e-05	6.93549e-05	7.94597e-05	0.000107729	9.27739e-05	0.000104844	7.59405e-05	0.000187313	6.47954e-05	7.10226e-05	0.000101706	0.000161664	0.000131889	0.000191573	0.000128955	0.000347465	0.000193225	9.40231e-05
Alphaproteobacteria	0.114221	0.118841	0.116509	0.114807	0.130326	0.131174	0.138538	0.145792	0.125531	0.103314	0.107992	0.102226	0.109357	0.108686	0.0998825	0.106263	0.123997	0.132087	0.122155	0.119125	0.110617	0.0966767	0.110673	0.126538
Alsuviricetes	0	0	0	0	0	0	0	0	7.69913e-08	7.79375e-08	0	6.97578e-08	0	1.35837e-07	0	2.91832e-07	0	0	0	0	0	3.34188e-07	1.73112e-07	9.60055e-08
Anaerolineae	0.00895864	0.00610294	0.00800239	0.00719843	0.00443768	0.00480002	0.00449519	0.00457739	0.0134388	0.0144499	0.0176505	0.0151683	0.0113729	0.00853618	0.0129185	0.00988256	0.0157885	0.0152615	0.0152662	0.0143469	0.0133319	0.0112426	0.0113129	0.0131115
Aquificae	3.80508e-05	2.87206e-05	3.61801e-05	3.69497e-05	3.52735e-05	3.68155e-05	3.57714e-05	3.1177e-05	2.75531e-05	2.94859e-05	3.19533e-05	2.88908e-05	3.39361e-05	3.10854e-05	3.41316e-05	3.19592e-05	2.68916e-05	1.84325e-05	2.7469e-05	2.36921e-05	3.43444e-05	2.21358e-05	2.48686e-05	2.58624e-05
Archaeoglobi	1.17062e-05	9.55259e-06	7.70192e-06	1.00574e-05	1.14102e-05	9.32896e-06	1.29476e-05	9.60054e-06	1.08286e-05	9.38377e-06	8.21563e-06	1.02179e-05	7.62596e-06	9.86028e-06	9.70038e-06	9.97137e-06	6.36515e-06	4.05483e-06	7.52243e-06	7.38891e-06	6.70561e-06	6.66753e-06	7.18535e-06	9.49424e-06
Ardenticatenia	0.000125581	0.000127005	0.000127253	0.000135147	0.000122392	0.000111132	0.000117413	0.000111998	0.000155157	0.000163481	0.000184123	0.000162142	0.000155852	0.000144049	0.000162081	0.000136744	0.000143427	0.000141912	0.000144749	0.000136596	0.000145738	0.000121639	0.000119169	0.000132953
Armatimonadia	0.000201763	0.000288698	0.000251325	0.000284789	0.000373884	0.000395611	0.000401813	0.000346306	0.00025095	0.000252112	0.000263887	0.000257502	0.00024418	0.000228837	0.000290866	0.00026782	0.000158987	0.000144486	0.000131284	0.000133023	0.000232742	0.000156807	0.000207129	0.00024307
Arthoniomycetes	0	0	8.98342e-08	0	0	0	2.50926e-07	9.03936e-08	0	0	0	2.52136e-07	0	2.45488e-07	0	0	0	0	0	0	1.06323e-07	0	0	0
Bacilli	0.00288382	0.00234105	0.00467951	0.00175541	0.00474628	0.00329987	0.00224736	0.00894727	0.0122531	0.0189033	0.00575906	0.0214625	0.0124979	0.0392726	0.00971896	0.0120203	0.0188093	0.0243288	0.0292064	0.0430938	0.0106474	0.0655846	0.0440843	0.017052
Bacteroidia	0.00113604	0.00104383	0.0012934	0.00103501	0.0008322	0.000956583	0.00082139	0.000802335	0.00130732	0.00146983	0.00133371	0.00144301	0.00148235	0.0013316	0.00146184	0.00140436	0.00177703	0.00165851	0.00159405	0.00153082	0.00152271	0.00134975	0.00123549	0.00130903
Balneolia	9.98897e-05	9.21255e-05	9.30032e-05	9.52376e-05	8.83695e-05	9.12472e-05	9.10515e-05	8.07392e-05	0.000112585	0.000116454	0.000122637	0.000108955	0.000111007	9.76589e-05	0.000108409	0.000105789	0.000111714	0.000105174	9.7014e-05	0.00011197	0.000125498	0.000105163	0.00010002	0.000130811
Bartheletiomycetes	0	0	0	0	0	0	0	0	0	3.07648e-07	0	0	0	0	0	0	0	0	0	0	0	0	0	0
Basidiobolomycetes	3.16809e-06	2.73557e-06	3.56714e-06	2.2284e-06	4.96374e-06	4.12084e-06	3.02379e-06	4.64303e-06	5.16647e-06	6.08719e-06	3.72058e-06	9.4851e-06	4.01858e-06	1.54505e-05	5.69429e-06	5.87276e-06	7.01491e-06	7.42362e-06	9.29899e-06	1.46268e-05	4.28977e-06	2.83094e-05	1.81228e-05	5.18206e-06
Betaproteobacteria	0.0967585	0.0913958	0.0892891	0.0859024	0.0756247	0.0740867	0.0679364	0.080428	0.105073	0.0765141	0.0786571	0.0756537	0.0806387	0.0669863	0.0768386	0.0747654	0.0839218	0.0871495	0.0843001	0.0808363	0.0729825	0.0642694	0.071208	0.0794797
Blastocatellia	0.0321014	0.0275564	0.030428	0.0301594	0.02951	0.0303237	0.0311056	0.0272572	0.0313995	0.030881	0.0387222	0.0338856	0.0263681	0.0249412	0.0297903	0.02624	0.0357335	0.0326464	0.031295	0.0318545	0.0412875	0.0343653	0.0341933	0.0413036
Blastocladiomycetes	1.21391e-07	6.49183e-07	2.79853e-07	3.67912e-07	8.24607e-07	1.41811e-06	2.84141e-07	3.06733e-06	3.64231e-06	2.70026e-06	1.61667e-06	6.91486e-06	2.69737e-06	7.81101e-06	2.72214e-06	3.44445e-06	5.99086e-06	5.85993e-06	7.08894e-06	9.34943e-06	1.65844e-06	1.66246e-05	1.03038e-05	3.08325e-06
Caldilineae	0.000238559	0.000235334	0.000246208	0.000256535	0.000216919	0.000228243	0.000211156	0.000219915	0.000287023	0.000306931	0.000352112	0.000315385	0.000306459	0.00026644	0.00030694	0.000270582	0.000286261	0.000280612	0.00027349	0.000268991	0.000296321	0.000247986	0.000256201	0.000280528
Caldisericia	4.26116e-06	1.23412e-05	3.78382e-06	6.74733e-06	4.52546e-06	4.02208e-06	1.38875e-06	2.02843e-06	4.79137e-06	6.2128e-06	4.90366e-06	5.74315e-06	1.08211e-05	6.43969e-06	5.98435e-06	8.2771e-06	6.61708e-06	4.22977e-06	5.04177e-06	5.7811e-06	3.2364e-06	3.82048e-06	3.15268e-06	3.16666e-06
Calditrichae	0.000155507	0.000130765	0.000163929	0.000152476	0.00013689	0.000143566	0.000141189	0.000115596	0.000146228	0.00014689	0.000168509	0.000150417	0.00015051	0.000117715	0.000159139	0.000137394	0.00017165	0.000163316	0.000168545	0.000131372	0.000167989	0.000132671	0.000148872	0.000161087
Candidatus_Babeliae	1.03658e-06	4.10308e-07	2.20906e-07	1.36534e-06	4.87763e-07	1.64212e-07	8.07257e-07	8.57281e-07	0	3.35677e-07	1.55083e-06	5.85223e-07	1.40003e-06	5.08066e-07	0	6.06063e-07	2.82302e-07	0	0	4.48321e-07	0	3.63247e-07	1.23652e-07	0
Candidatus_Brocadiae	0.000256691	0.000243741	0.000242564	0.000273019	0.000235426	0.000236777	0.00022895	0.000220711	0.000216543	0.000226699	0.000232071	0.000238398	0.000243324	0.0002089	0.00024464	0.000232967	0.000230295	0.000199259	0.00022903	0.000190158	0.00023965	0.000199518	0.000194886	0.00021136
Candidatus_Cryosericia	5.93673e-06	6.19354e-06	3.47931e-06	4.44078e-06	5.57679e-06	5.44693e-06	5.23499e-06	4.70728e-06	5.73509e-06	5.37802e-06	6.67393e-06	5.90105e-06	6.26914e-06	5.77869e-06	5.88556e-06	3.99905e-06	2.75201e-06	3.37915e-06	3.43118e-06	3.435e-06	5.55756e-06	3.69644e-06	4.23826e-06	4.56231e-06
Candidatus_Fermentibacteria_(class)	8.50793e-07	6.75292e-07	2.52864e-06	1.25519e-06	4.49726e-07	5.63879e-07	3.52022e-07	6.97304e-07	1.16359e-06	3.27172e-06	6.5566e-07	1.58868e-06	1.06753e-06	1.11749e-06	1.11691e-06	9.532e-07	2.53097e-06	5.34749e-07	2.42539e-06	1.01058e-06	2.54588e-07	1.81622e-06	7.60533e-07	9.58638e-07
Candidatus_Lambdaproteobacteria	9.04328e-06	9.85515e-06	1.0417e-05	7.13387e-06	7.46508e-06	4.79919e-06	9.72949e-06	9.10147e-06	9.62272e-06	8.12991e-06	7.56415e-06	9.05452e-06	8.15156e-06	4.78911e-06	7.04584e-06	1.0021e-05	7.68682e-06	9.79636e-06	8.42693e-06	8.60384e-06	6.10267e-06	5.09259e-06	7.83167e-06	5.52986e-06
Candidatus_Marinamargulisbacteria	7.08686e-07	1.76234e-06	1.48157e-06	1.26902e-06	2.13083e-06	1.12206e-06	1.1876e-06	5.51546e-07	4.19544e-07	1.63275e-07	4.42265e-07	7.10432e-07	6.19019e-07	1.16405e-06	9.06865e-07	5.66915e-07	7.16134e-07	7.71117e-07	0	1.24534e-07	4.44949e-07	6.23484e-08	4.21996e-07	1.05033e-06
Candidatus_Mcinerneyibacteria	0	0	2.69502e-07	0	3.88881e-07	0	0	0	2.43724e-07	4.19019e-07	2.21665e-07	8.40455e-08	7.53128e-08	0	7.04562e-08	7.15276e-08	0	0	0	0	0	0	0	0
Candidatus_Methanofastidiosa	6.15297e-06	6.11968e-06	6.19013e-06	5.38173e-06	4.99605e-06	5.49185e-06	4.35408e-06	3.51017e-06	5.22219e-06	5.99157e-06	6.25929e-06	6.57307e-06	4.92915e-06	8.26075e-06	6.82162e-06	8.15386e-06	3.43669e-06	4.59485e-06	8.11928e-06	5.29963e-06	5.34816e-06	3.43179e-06	4.9416e-06	2.98047e-06
Candidatus_Methanoliparia	4.53289e-07	2.27087e-06	9.26199e-07	1.20252e-06	4.49521e-07	1.39719e-06	1.80535e-06	9.57149e-07	7.82229e-07	9.28464e-07	4.33967e-07	9.47784e-07	8.91937e-07	1.313e-06	4.031e-07	4.08903e-07	0	7.97407e-07	8.82386e-08	5.52602e-07	7.95029e-08	5.55306e-07	0	3.67827e-07
Candidatus_Methanomethylia	1.06503e-06	1.12945e-06	7.8914e-07	1.82059e-06	7.33636e-07	1.30653e-06	8.76281e-07	5.67881e-07	7.34471e-07	9.91656e-07	1.61984e-06	2.13684e-06	9.74983e-07	4.10867e-07	8.19002e-07	2.79664e-06	2.47194e-06	1.02785e-06	1.50831e-06	2.05573e-06	1.30168e-06	1.63842e-06	1.52054e-06	9.75801e-07
Candidatus_Muproteobacteria	0.000129405	0.000121553	0.000140522	0.000139563	0.000111882	0.000108164	0.000124625	0.000113984	0.000164534	0.000158526	0.000145377	0.000143107	0.000147353	0.000122733	0.000141959	0.000140755	0.000157519	0.000153189	0.000173366	0.000158115	0.000117509	0.000107154	0.000104798	0.000118343
Candidatus_Ozemobacteria	4.04956e-06	4.07429e-06	4.61966e-06	3.93885e-06	3.6195e-06	4.02274e-06	3.06934e-06	4.18555e-06	5.24956e-06	2.27044e-06	2.80125e-06	2.21095e-06	3.61737e-06	4.17912e-06	4.2694e-06	4.28377e-06	4.28098e-06	3.50145e-06	2.07396e-06	2.6665e-06	2.04041e-06	2.45167e-06	1.73057e-06	3.51872e-06
Candidatus_Peribacteria	1.02209e-05	1.38358e-05	1.02068e-05	1.86963e-05	1.01264e-05	1.15112e-05	7.87578e-06	8.55963e-06	1.02521e-05	1.67148e-05	1.09127e-05	1.31791e-05	1.26279e-05	1.36318e-05	1.2173e-05	1.23307e-05	8.88212e-06	1.05008e-05	1.30849e-05	9.82221e-06	1.35029e-05	1.12215e-05	1.10223e-05	1.48678e-05
Candidatus_Poseidoniia	8.30709e-06	1.17735e-05	9.47936e-06	9.07311e-06	7.83229e-06	8.54622e-06	6.79335e-06	8.41889e-06	6.03899e-06	6.96388e-06	1.27342e-05	5.56199e-06	1.04011e-05	7.22516e-06	9.69072e-06	1.17786e-05	8.98922e-06	7.90706e-06	4.86467e-06	5.75213e-06	7.23812e-06	6.98948e-06	6.10375e-06	1.13525e-05
Candidatus_Riflemargulisbacteria	7.87403e-08	3.28668e-07	2.94723e-07	4.9909e-07	5.3065e-07	1.39062e-07	5.43932e-07	3.83284e-07	5.76377e-07	1.8125e-07	0	3.38204e-07	5.50173e-07	1.45689e-07	1.01737e-06	1.22285e-07	6.72294e-07	7.62404e-07	7.85602e-07	4.88657e-07	5.30111e-07	5.95221e-07	6.86954e-08	1.23661e-06
Candidatus_Sumerlaeia	1.93781e-05	1.90211e-05	2.00836e-05	1.76288e-05	1.9248e-05	2.05087e-05	1.58977e-05	1.88948e-05	1.56875e-05	1.77884e-05	1.97538e-05	1.9382e-05	1.79491e-05	1.47164e-05	2.19809e-05	1.82962e-05	1.38472e-05	1.43133e-05	1.83289e-05	1.88196e-05	1.38615e-05	1.25588e-05	1.55823e-05	1.91635e-05
Candidatus_Termititenacia	5.74943e-07	1.28173e-06	3.46678e-07	5.27959e-07	1.7858e-06	8.03926e-07	6.61069e-07	2.96478e-07	3.68207e-07	1.69299e-06	9.59715e-07	3.95422e-07	2.04036e-07	1.24686e-06	5.8725e-07	2.80857e-07	1.67921e-07	4.44297e-07	1.56027e-06	1.43299e-07	4.10457e-08	1.38912e-07	0	5.94793e-07
Candidatus_Thermofonsia	9.75509e-05	0.000106686	0.000124936	0.000124218	0.000101581	0.000107819	0.000107944	9.5336e-05	0.000103231	0.000102128	9.91632e-05	0.000109573	0.000107793	0.000106432	0.000113868	0.000115926	7.5231e-05	6.70462e-05	6.23448e-05	6.06113e-05	6.86601e-05	6.33065e-05	7.52602e-05	8.58516e-05
Caudoviricetes	0.000302685	0.000430315	0.000392173	0.000242681	0.000337642	0.000329781	0.00033679	0.000578038	0.000329964	0.000355458	0.000263061	0.000248648	0.000384058	0.000315104	0.000411304	0.000413232	0.000180265	0.000218301	0.000165784	0.000224177	0.00038544	0.000269723	0.000231399	0.000397409
Chitinispirillia	3.10642e-06	3.56181e-06	1.57983e-06	2.8633e-06	4.39314e-06	3.84487e-06	2.42684e-06	2.80122e-06	2.40993e-06	2.58888e-06	2.06784e-06	2.93135e-06	3.13949e-06	2.97411e-06	2.40799e-06	3.16244e-06	1.36577e-06	8.43225e-07	2.07631e-06	1.67815e-06	9.91573e-07	9.08547e-07	2.39761e-06	1.18108e-06
Chitinivibrionia	0	1.82382e-07	4.4463e-07	3.30981e-07	0	0	4.8308e-07	2.1684e-07	0	2.54144e-07	3.05538e-07	6.59871e-07	6.73042e-07	1.05701e-06	0	3.83714e-07	3.62411e-07	0	3.98163e-07	1.53836e-07	5.10105e-08	9.6586e-08	6.60283e-07	0
Chitinophagia	0.0135426	0.012537	0.0184773	0.0145626	0.0142833	0.0163524	0.0133152	0.0127297	0.016149	0.0161217	0.0160951	0.0155247	0.0174542	0.0161418	0.0184996	0.0167499	0.0176003	0.0162487	0.0155119	0.0156757	0.0208139	0.0132132	0.0140542	0.0179774
Chlamydiia	4.4314e-05	5.73057e-05	4.52585e-05	5.66995e-05	5.2402e-05	5.16201e-05	5.02118e-05	5.82052e-05	5.33682e-05	6.41257e-05	5.75585e-05	5.62069e-05	0.000147489	0.00020197	9.57256e-05	0.000166751	4.87583e-05	3.9162e-05	3.73401e-05	4.37903e-05	5.32688e-05	4.44591e-05	4.13208e-05	4.79112e-05
Chlorobia	0.000125164	0.000121246	0.000133098	0.000130338	0.00012896	0.00012843	0.000138187	0.000124215	0.000121715	0.000126186	0.000136722	0.000121682	0.000117401	0.000105379	0.000126104	0.000122002	0.000119687	9.9699e-05	0.000125212	0.000100607	0.00012624	0.000102517	0.000106983	0.00012154
Chloroflexia	0.00195424	0.00220661	0.00213752	0.00220753	0.00209589	0.00216858	0.00219852	0.00200723	0.0024899	0.00245807	0.002735	0.00260812	0.00286266	0.00261551	0.002733	0.00244758	0.00221159	0.0023434	0.00222037	0.00198889	0.00255767	0.00213749	0.00246871	0.00245822
Chrysiogenetes	8.6306e-06	8.56271e-06	7.78581e-06	9.45098e-06	7.96893e-06	9.73997e-06	7.72496e-06	5.90129e-06	9.02567e-06	5.56278e-06	1.06078e-05	1.01613e-05	8.47358e-06	9.4095e-06	1.22498e-05	7.87516e-06	7.63781e-06	1.16869e-05	6.71178e-06	8.51214e-06	6.13493e-06	7.37513e-06	7.39096e-06	1.01126e-05
Chthonomonadetes	0.000284879	0.000423506	0.000361773	0.000490928	0.00066161	0.000712596	0.000664626	0.000622876	0.000346522	0.000387085	0.000395097	0.000384873	0.000317123	0.00028498	0.00040224	0.000369608	0.000265715	0.000207934	0.000205772	0.00021579	0.000323213	0.000231458	0.000251016	0.000302972
Chytridiomycetes	5.45481e-06	6.04567e-06	1.10445e-05	3.9057e-06	1.2903e-05	7.16037e-06	5.54146e-06	2.20001e-05	2.35375e-05	2.65737e-05	1.18046e-05	3.27982e-05	1.95403e-05	5.9838e-05	1.37586e-05	1.77045e-05	2.88284e-05	3.21506e-05	3.79857e-05	6.25675e-05	1.75653e-05	0.000107849	6.58133e-05	2.84713e-05
Clostridia	0.000733922	0.000825765	0.000800194	0.000857202	0.000836158	0.000822958	0.000767654	0.00085176	0.000902661	0.00103859	0.000874307	0.00107229	0.00101899	0.00137012	0.000977609	0.000971785	0.000958734	0.00101635	0.00109268	0.00124235	0.000884249	0.00160005	0.00129397	0.000933009
Coprothermobacteria	3.00614e-06	2.53828e-06	3.29544e-06	1.04177e-06	2.45677e-06	1.56773e-06	2.67139e-06	1.97042e-06	1.56317e-06	2.56034e-06	3.02697e-06	2.57189e-06	2.27945e-06	2.0318e-06	2.25262e-06	3.42235e-06	8.66247e-07	1.2891e-06	1.89335e-06	7.71971e-07	1.71792e-06	1.63926e-06	1.69131e-06	1.74933e-06
Coriobacteriia	4.10141e-05	4.73492e-05	4.40255e-05	5.08904e-05	4.06168e-05	4.43846e-05	4.35988e-05	3.90487e-05	4.05353e-05	4.92897e-05	4.39795e-05	4.48634e-05	4.38443e-05	4.36133e-05	4.3074e-05	3.86968e-05	4.86331e-05	4.56131e-05	5.12572e-05	4.38087e-05	4.2942e-05	3.9504e-05	4.11311e-05	4.64966e-05
Cytophagia	0.00228392	0.00287689	0.00325535	0.00263141	0.00253255	0.00252613	0.00375547	0.00242956	0.00293847	0.00391063	0.002831	0.00300962	0.00291136	0.00298951	0.0029115	0.00285752	0.00298259	0.00293179	0.00337033	0.00309486	0.00316361	0.00273684	0.00259788	0.0026065
Dacrymycetes	4.29275e-07	1.01694e-06	1.98962e-06	1.27818e-06	2.17612e-06	1.39463e-06	3.69389e-07	1.77547e-06	4.09129e-06	5.95841e-06	3.14033e-06	5.31209e-06	4.07591e-06	1.19018e-05	3.09725e-06	2.70983e-06	5.65132e-06	6.68441e-06	6.37933e-06	1.20513e-05	3.61683e-06	2.03092e-05	1.21453e-05	5.2053e-06
Deferribacteres	1.23548e-05	1.43781e-05	1.53209e-05	1.39426e-05	9.03516e-06	1.19909e-05	1.15154e-05	1.17976e-05	1.27363e-05	1.64117e-05	1.38857e-05	1.57207e-05	1.38857e-05	1.03283e-05	1.49902e-05	1.50765e-05	1.1562e-05	1.67322e-05	1.52019e-05	1.31282e-05	1.4284e-05	1.16463e-05	1.47228e-05	1.74103e-05
Dehalococcoidia	0.00116325	0.00116206	0.00112933	0.00116886	0.000811404	0.000850893	0.000806593	0.000769218	0.00123899	0.00121171	0.00129979	0.00130447	0.00139581	0.00121021	0.00138685	0.0012885	0.000995467	0.000904541	0.000941882	0.000944884	0.00111815	0.000926147	0.00107094	0.00111151
Deinococci	0.000449491	0.000465982	0.000464135	0.000464801	0.000476217	0.000447351	0.000460391	0.000412519	0.000454271	0.000452423	0.000490296	0.0004539	0.00045982	0.000440103	0.000506133	0.000472039	0.000406112	0.000401096	0.000389652	0.000377975	0.00042523	0.000350558	0.000426531	0.000436811
Deltaproteobacteria	0.0556229	0.0663087	0.0545223	0.0550271	0.0577019	0.0499266	0.0548688	0.0453005	0.0379863	0.0398269	0.0399844	0.0392363	0.0514377	0.0469775	0.050726	0.0580675	0.0310475	0.0301072	0.0268584	0.0306173	0.03614	0.027445	0.0398129	0.0335108
Dictyoglomia	4.29183e-06	4.79104e-06	4.64095e-06	5.26392e-06	4.31104e-06	5.32073e-06	4.98075e-06	4.6429e-06	5.60349e-06	5.89748e-06	6.24641e-06	4.68987e-06	5.53631e-06	5.15517e-06	5.01868e-06	4.99432e-06	1.51837e-06	2.52633e-06	4.52932e-06	2.14401e-06	2.57474e-06	2.34734e-06	3.02183e-06	4.15488e-06
Dimargaritomycetes	8.91855e-08	1.94766e-07	2.33007e-07	4.12663e-07	3.40367e-07	0	2.88793e-07	1.1244e-06	1.79094e-06	1.91352e-06	1.13505e-06	1.51308e-06	9.43504e-07	3.02251e-06	9.59312e-07	6.72106e-07	1.41598e-06	2.22174e-06	3.11834e-06	2.56219e-06	1.77075e-06	6.08089e-06	3.46393e-06	2.56503e-06
Dothideomycetes	1.77381e-05	2.57194e-05	2.75942e-05	2.16437e-05	2.87284e-05	2.90997e-05	0.000139448	3.92134e-05	3.50482e-05	4.25183e-05	3.41608e-05	4.35733e-05	3.30673e-05	8.18649e-05	3.9117e-05	4.02517e-05	4.05645e-05	4.7885e-05	4.80424e-05	6.83824e-05	3.50521e-05	9.58107e-05	6.59587e-05	3.63437e-05
Elusimicrobia	2.4224e-07	1.15799e-06	1.43093e-06	2.14036e-07	9.92385e-07	2.09505e-06	9.65871e-07	5.71887e-07	1.57621e-06	2.09904e-06	1.14888e-06	2.76559e-06	2.15182e-06	8.93982e-07	2.16135e-06	2.93749e-06	1.64929e-06	7.70004e-07	2.34707e-06	1.42841e-06	2.47665e-06	1.80706e-06	1.40362e-06	1.64234e-06
Endogonomycetes	8.2272e-06	8.0341e-06	1.0093e-05	5.56593e-06	8.70433e-06	8.03579e-06	6.48546e-06	8.54439e-06	8.62441e-06	1.2878e-05	7.90708e-06	1.45038e-05	1.19453e-05	1.90984e-05	7.37301e-06	9.02776e-06	9.90098e-06	1.09247e-05	1.27173e-05	1.68776e-05	4.15408e-06	3.24128e-05	2.06786e-05	7.51317e-06
Endomicrobia	1.07903e-07	0	3.0228e-07	6.73441e-07	0	3.007e-07	7.15247e-07	3.89749e-07	5.47118e-07	1.30243e-06	8.1461e-07	1.45762e-06	3.18399e-06	2.04174e-07	2.14014e-06	1.44946e-06	2.64569e-06	2.48445e-06	2.16687e-06	1.70022e-06	1.9071e-06	1.67921e-06	1.32498e-06	1.68577e-06
Entomophthoromycetes	3.59318e-07	9.50365e-08	5.74623e-07	1.51068e-07	9.60577e-07	7.96278e-07	9.41368e-07	1.28004e-06	1.55535e-06	1.53159e-06	7.68543e-07	3.20046e-06	7.60365e-07	4.51826e-06	5.99643e-07	1.58237e-06	2.55654e-06	2.85339e-06	2.32822e-06	3.54727e-06	2.35125e-06	9.82425e-06	4.15941e-06	2.52677e-06
Epsilonproteobacteria	5.58012e-05	6.02086e-05	6.20161e-05	6.11139e-05	5.57209e-05	5.315e-05	5.59193e-05	4.76953e-05	6.26087e-05	5.3809e-05	5.11408e-05	5.96665e-05	5.65712e-05	4.82548e-05	5.49249e-05	5.39357e-05	5.87356e-05	7.06821e-05	5.72574e-05	5.91841e-05	5.63324e-05	5.43741e-05	5.06424e-05	5.47315e-05
Erysipelotrichia	1.35919e-05	1.16084e-05	1.37914e-05	1.25596e-05	1.41127e-05	1.33919e-05	1.23203e-05	1.99957e-05	1.6381e-05	2.48362e-05	1.86713e-05	2.47661e-05	1.70559e-05	5.26039e-05	1.67598e-05	1.92137e-05	1.99451e-05	3.22799e-05	3.99159e-05	4.52304e-05	2.2304e-05	6.04134e-05	4.38999e-05	2.45022e-05
Eurotiomycetes	2.63257e-05	3.07155e-05	4.24895e-05	2.0131e-05	5.25412e-05	2.81005e-05	3.08649e-05	5.37539e-05	6.23249e-05	8.81201e-05	4.08591e-05	9.34263e-05	5.38123e-05	0.000174766	4.6866e-05	6.13964e-05	9.85465e-05	0.000134062	0.000126588	0.000193758	5.66986e-05	0.000267923	0.000198847	7.9903e-05
Exobasidiomycetes	1.81103e-06	5.63898e-06	4.60081e-06	3.1038e-06	7.03674e-06	3.39236e-06	2.99254e-06	1.01972e-05	1.25625e-05	1.64972e-05	5.14102e-06	1.87179e-05	1.06359e-05	3.13587e-05	9.12666e-06	1.02528e-05	2.30559e-05	2.08446e-05	2.31751e-05	3.57544e-05	7.8682e-06	5.02745e-05	3.82078e-05	1.76473e-05
Fibrobacteria	3.28172e-05	3.23917e-05	3.89523e-05	3.90339e-05	4.35202e-05	4.05506e-05	4.07927e-05	3.68663e-05	2.94769e-05	3.23597e-05	2.82249e-05	2.70676e-05	3.86329e-05	3.1293e-05	4.32964e-05	4.32988e-05	2.1424e-05	2.4922e-05	2.04342e-05	2.1563e-05	1.69729e-05	1.35893e-05	2.35781e-05	2.20765e-05
Fimbriimonadia	0.000150883	0.00022074	0.00015961	0.000243571	0.000247156	0.000309221	0.000240375	0.000240173	0.000166991	0.000179182	0.000177429	0.000181889	0.000181301	0.000141456	0.000234286	0.00018497	7.92891e-05	5.86077e-05	7.56581e-05	6.39013e-05	0.000135858	0.000132762	0.000155098	0.000174688
Flasuviricetes	4.92833e-07	3.19677e-07	0	0	2.26774e-07	0	1.25765e-07	0	5.38111e-07	5.44725e-07	2.62727e-07	2.62529e-07	3.38908e-07	4.39205e-07	2.76411e-07	7.40407e-07	0	3.9626e-07	0	0	1.14153e-07	0	1.24064e-07	5.1781e-07
Flavobacteriia	0.00111105	0.00110968	0.00139426	0.00126519	0.00103692	0.00113224	0.00442709	0.000948444	0.00132689	0.00142907	0.00134392	0.00135302	0.0013539	0.00116382	0.00142224	0.00131889	0.00143845	0.0014466	0.00150435	0.00132854	0.00206795	0.00109068	0.00109198	0.0012914
Fusobacteriia	6.69632e-06	6.42926e-06	5.38017e-06	8.7136e-06	5.85323e-06	5.85484e-06	5.80925e-06	4.60457e-06	6.28861e-06	8.14654e-06	6.2785e-06	8.60479e-06	4.73411e-06	5.57765e-06	7.31616e-06	6.287e-06	7.67496e-06	5.73938e-06	6.01642e-06	7.84194e-06	6.87045e-06	6.83637e-06	6.68417e-06	6.10975e-06
Gammaproteobacteria	0.0283259	0.032261	0.0340956	0.0360827	0.0322464	0.0292247	0.0426988	0.0354969	0.0308724	0.0313134	0.0287387	0.0316818	0.034772	0.0405131	0.0359528	0.0355632	0.0305283	0.03444	0.0309086	0.0323018	0.0306207	0.0322516	0.0335495	0.0314894
Gemmatimonadetes	0.0466496	0.044787	0.0426081	0.0405867	0.0414444	0.0435026	0.0393532	0.0366465	0.033626	0.0364694	0.0377087	0.0350905	0.0404677	0.0378844	0.0444003	0.0405938	0.0311011	0.0290142	0.0266051	0.0294636	0.0461075	0.0358835	0.0414246	0.0436766
Gloeobacteria	8.97981e-05	9.77719e-05	9.77749e-05	9.74969e-05	9.74533e-05	0.000104011	0.000104098	9.83541e-05	7.47459e-05	8.518e-05	8.98653e-05	8.79852e-05	8.7985e-05	8.06271e-05	0.000100955	8.82252e-05	8.20315e-05	7.18901e-05	7.10642e-05	6.93244e-05	9.14876e-05	6.45192e-05	8.10316e-05	9.31289e-05
Glomeromycetes	0.000197361	0.00040408	0.000317788	0.000278462	0.000297642	0.000105357	0.000102349	0.000238304	0.000992226	0.00154923	0.00033589	0.000585177	0.000289408	0.00083629	0.000218641	0.000337737	0.000408564	0.000546249	0.000581364	0.000729492	0.000197329	0.00106149	0.000747127	0.000318613
Hadesarchaea	5.75665e-06	4.44545e-06	3.46818e-06	4.79789e-06	3.78392e-06	5.0459e-06	6.7559e-06	4.23189e-06	5.08854e-06	7.42392e-06	6.52912e-06	4.40683e-06	4.94857e-06	4.87349e-06	7.65701e-06	4.32281e-06	6.73631e-06	4.2847e-06	6.91896e-06	4.69861e-06	8.36567e-06	6.41194e-06	4.23265e-06	5.00951e-06
Halobacteria	9.81967e-05	9.7761e-05	0.000104015	0.000110814	0.000102993	0.000109995	0.000109518	0.000109369	0.000108387	0.000112002	0.000119101	0.000121906	0.000115996	0.000100548	0.000122525	0.000117178	0.00011747	0.00010744	0.000106465	0.000109235	0.000117634	9.54289e-05	9.94597e-05	0.000112484
Harpellomycetes	3.55972e-06	3.54428e-06	3.59181e-06	1.62025e-06	4.77055e-06	1.735e-06	3.23842e-06	3.5338e-06	9.48712e-06	9.12642e-06	5.55509e-06	7.8939e-06	5.92808e-06	1.05805e-05	3.48779e-06	5.31459e-06	8.28047e-06	8.94479e-06	1.07132e-05	1.11565e-05	9.99987e-06	2.18761e-05	1.05892e-05	5.92955e-06
Herviviricetes	2.18504e-07	0	0	0	5.95473e-07	1.92949e-07	0	9.37834e-08	1.92478e-07	9.74219e-08	2.82622e-07	0	1.75102e-07	8.48979e-08	0	0	3.74593e-07	2.82089e-07	0	0	1.1031e-07	1.04434e-07	1.08195e-07	1.20007e-07
Holophagae	0.000215979	0.000210813	0.000225606	0.000220519	0.000209169	0.000206765	0.000209601	0.000191568	0.000235365	0.000237167	0.000244336	0.000238289	0.000225589	0.00018926	0.000260736	0.000235732	0.000228473	0.000248357	0.000244891	0.000195601	0.000235182	0.000207331	0.000201786	0.000236605
Howeltoviricetes	8.49689e-07	2.97099e-07	9.59715e-07	4.45028e-08	2.99291e-07	1.09728e-06	5.50608e-07	1.99846e-06	5.65387e-06	6.38351e-06	2.06179e-06	5.99556e-06	3.42615e-06	1.5697e-05	2.8726e-06	2.41998e-06	6.90255e-06	7.75725e-06	7.83896e-06	1.45295e-05	2.87647e-06	1.97963e-05	1.41055e-05	3.93486e-06
Hydrogenophilalia	0.000233787	0.000223503	0.000245443	0.000240419	0.000205748	0.000211741	0.000204948	0.000206872	0.000217856	0.000220862	0.000234431	0.000208982	0.000217993	0.000180417	0.000210979	0.000209341	0.000257394	0.000254938	0.000250216	0.000223993	0.000203714	0.000170656	0.000197579	0.000230403
Ignavibacteria	0.000362819	0.000369818	0.000389694	0.000379449	0.000352754	0.000411712	0.000336321	0.000331156	0.000348543	0.000473084	0.000391768	0.000394232	0.000367676	0.000321889	0.000395034	0.000375868	0.000361299	0.000328223	0.00036159	0.00033397	0.00040991	0.000331635	0.000317745	0.000353539
Kickxellomycetes	3.80008e-07	0	2.69436e-07	0	1.82156e-06	5.90766e-07	0	1.32983e-06	1.63975e-06	1.80954e-06	5.88855e-07	1.61386e-06	1.91708e-06	6.20798e-06	7.22729e-07	1.94223e-06	2.35453e-06	2.37617e-06	3.84413e-06	8.13648e-06	8.76578e-07	8.52479e-06	4.75465e-06	1.28094e-06
Kiritimatiellae	5.5683e-05	6.30514e-05	5.61896e-05	5.92644e-05	6.2444e-05	5.85733e-05	6.23996e-05	5.65042e-05	4.12999e-05	4.62783e-05	4.78055e-05	4.75272e-05	5.46765e-05	4.23872e-05	4.95696e-05	5.71577e-05	3.97344e-05	4.27193e-05	3.28959e-05	3.6519e-05	2.98243e-05	3.14829e-05	2.96501e-05	3.97495e-05
Ktedonobacteria	0.00285941	0.00435713	0.00193999	0.00425407	0.00418784	0.00450754	0.0059067	0.00426455	0.00181085	0.00241534	0.0019145	0.00190186	0.00383773	0.00399174	0.00362272	0.00374705	0.000703804	0.000575355	0.000526857	0.000573505	0.00111312	0.000698977	0.000989251	0.00101202
Laserviricetes	0	0	0	0	0	0	0	0	0	0	0	0	0	0	4.92228e-07	0	0	0	0	0	0	0	0	0
Lecanoromycetes	2.4439e-07	8.50926e-07	8.07936e-07	7.16349e-07	3.29625e-07	0	2.03502e-06	9.65902e-07	9.59484e-07	1.27766e-07	6.80628e-07	1.33888e-06	9.07037e-07	2.11287e-06	3.51722e-07	7.78019e-07	5.84693e-07	2.2208e-06	1.58564e-06	2.84544e-06	1.47677e-06	3.32597e-06	1.1284e-06	6.8822e-07
Lentisphaeria	4.41965e-05	5.43765e-05	5.6168e-05	6.65592e-05	5.8721e-05	6.16827e-05	5.71593e-05	5.96245e-05	4.71874e-05	5.00199e-05	5.08042e-05	4.63465e-05	4.39657e-05	4.05128e-05	4.9877e-05	4.28434e-05	3.60615e-05	3.5897e-05	2.56483e-05	3.09211e-05	4.42835e-05	2.67247e-05	3.12547e-05	3.65366e-05
Leotiomycetes	1.17095e-05	1.46071e-05	1.83028e-05	1.79198e-05	1.64488e-05	1.48518e-05	1.90676e-05	2.04596e-05	2.37789e-05	2.44858e-05	1.86108e-05	2.9516e-05	2.23619e-05	4.52176e-05	1.48987e-05	1.82297e-05	2.16191e-05	3.31064e-05	2.57881e-05	4.31987e-05	3.50539e-05	5.71144e-05	3.78651e-05	1.84826e-05
Limnochordia	1.07193e-05	8.14196e-06	9.53175e-06	7.65254e-06	8.68744e-06	1.08447e-05	1.07636e-05	7.04105e-06	1.11237e-05	9.40862e-06	1.24233e-05	1.25723e-05	1.08653e-05	9.39272e-06	1.21948e-05	1.14617e-05	1.63433e-05	1.27565e-05	1.3629e-05	1.04436e-05	1.48912e-05	9.45659e-06	1.06424e-05	1.23537e-05
Longimicrobia	0.000434987	0.000382034	0.000469748	0.000686774	0.000879719	0.00044832	0.000448207	0.000396698	0.000419843	0.000493239	0.000751484	0.000426847	0.000399585	0.000395243	0.000546547	0.000576822	0.000413462	0.000553823	0.000356754	0.000449127	0.000582129	0.000434108	0.000477074	0.000636378
Malasseziomycetes	1.57739e-06	1.33905e-06	2.78591e-06	1.77571e-06	2.40799e-06	3.13607e-06	1.21526e-06	2.01332e-06	7.44583e-07	2.49883e-06	1.99974e-06	3.91163e-07	7.59505e-07	1.90446e-06	1.00906e-06	1.32458e-06	4.00402e-07	6.91775e-07	1.37165e-06	7.83754e-07	1.10538e-06	3.44e-06	2.53096e-06	7.2251e-07
Malgrandaviricetes	0	0	6.11075e-07	3.34474e-07	0	0	0	0	0	0	6.91431e-08	6.39979e-08	0	2.49242e-07	0	0	0	0	0	0	0	0	0	0
Megaviricetes	1.72515e-06	3.79887e-06	2.67236e-06	4.17676e-06	2.77569e-06	2.66747e-06	2.48485e-06	4.03522e-06	2.60783e-06	4.028e-06	4.13953e-06	3.35112e-06	3.72486e-06	6.39013e-06	3.30051e-06	3.39879e-06	3.43892e-06	4.60336e-06	4.46333e-06	3.80279e-06	6.11826e-06	7.27497e-06	3.33498e-06	4.6388e-06
Methanobacteria	9.71194e-06	1.31804e-05	1.36417e-05	1.29772e-05	1.36017e-05	1.25018e-05	1.41493e-05	1.0064e-05	1.38197e-05	1.78646e-05	1.84946e-05	1.89618e-05	1.30504e-05	1.35336e-05	1.79134e-05	1.51915e-05	1.06469e-05	1.42802e-05	1.27973e-05	1.27322e-05	1.14172e-05	1.27458e-05	1.18823e-05	1.34596e-05
Methanococci	3.80645e-06	2.83632e-06	2.76429e-06	1.62735e-06	3.57225e-06	4.70263e-06	3.75328e-06	2.16804e-06	4.62489e-06	3.31266e-06	4.21272e-06	3.2018e-06	2.30002e-06	4.3778e-06	3.42042e-06	2.38498e-06	2.41805e-06	1.38344e-06	3.01797e-06	1.69026e-06	2.47251e-06	1.42231e-06	2.18286e-06	4.48873e-06
Methanomicrobia	0.000252647	0.000253041	0.000274341	0.00028463	0.000258551	0.000265447	0.000250725	0.000243181	0.000251608	0.000273178	0.000312014	0.00028236	0.000264345	0.000244649	0.000256504	0.000257886	0.00025888	0.000257816	0.000257919	0.000235019	0.000293595	0.000238418	0.000237563	0.000278935
Methanonatronarchaeia	9.39804e-08	0	8.01746e-08	7.66197e-07	7.31764e-08	0	8.38431e-08	0	2.48359e-07	8.38038e-08	1.03474e-06	5.00385e-07	0	5.62204e-07	0	0	1.09432e-07	5.20463e-07	9.23434e-08	9.3676e-07	0	1.48605e-07	0	2.66682e-07
Methanopyri	2.42783e-07	0	9.55928e-08	2.09191e-07	1.81768e-07	3.0509e-07	0	0	1.04042e-07	4.05081e-07	1.04675e-07	0	0	2.82993e-07	4.65656e-07	2.95776e-07	1.24864e-07	0	1.17652e-07	1.34113e-07	8.97083e-07	7.56474e-07	1.10969e-07	1.29737e-07
Methylacidiphilae	7.39156e-06	1.11229e-05	6.82815e-06	8.34835e-06	7.47888e-06	5.706e-06	5.20746e-06	8.31057e-06	9.20522e-06	5.63467e-06	1.02512e-05	9.86941e-06	8.87935e-06	8.47641e-06	6.46319e-06	8.70263e-06	1.1131e-05	1.36369e-05	9.72149e-06	9.3998e-06	1.03032e-05	6.23458e-06	9.6267e-06	8.08167e-06
Microbotryomycetes	7.6374e-07	2.41066e-06	4.07815e-06	8.87923e-07	1.00027e-06	1.06187e-06	1.48189e-06	2.34788e-06	2.47027e-06	5.15308e-06	1.12607e-06	4.60459e-06	2.12238e-06	8.91709e-06	3.15406e-06	3.89624e-06	2.91759e-06	7.21588e-06	6.74717e-06	9.2951e-06	4.64597e-06	1.94974e-05	1.04388e-05	4.31447e-06
Mixiomycetes	0	2.99545e-07	2.83148e-07	1.10609e-06	1.72289e-07	4.88478e-07	7.89611e-07	5.74871e-07	4.87287e-07	3.45763e-07	1.67177e-07	0	0	8.81833e-07	1.16007e-06	1.1091e-06	1.23284e-07	1.4283e-07	0	5.63712e-07	4.46827e-07	4.23022e-07	9.30711e-08	3.64578e-07
Mollicutes	1.83548e-05	2.62393e-05	1.88505e-05	1.48814e-05	2.00427e-05	1.67977e-05	1.40548e-05	2.74047e-05	4.57305e-05	6.00987e-05	2.93004e-05	5.26838e-05	6.85074e-05	0.00203752	2.57248e-05	3.93424e-05	4.67786e-05	6.37419e-05	6.08585e-05	9.07253e-05	3.21379e-05	0.000139034	9.6185e-05	4.45823e-05
Moniliellomycetes	0	0	0	0	4.09964e-07	9.29874e-08	9.39447e-08	0	0	0	0	8.40455e-08	0	0	0	0	0	0	0	0	0	0	0	0
Monjiviricetes	0	0	0	0	0	0	0	0	0	1.1358e-06	0	0	0	0	0	0	0	0	0	0	0	0	0	0
Monoblepharidomycetes	7.31574e-07	8.71508e-07	1.60144e-06	1.06172e-06	1.25962e-06	6.75311e-07	1.9824e-06	2.24343e-06	2.49023e-06	2.86639e-06	1.24899e-06	2.79206e-06	1.28215e-06	6.1509e-06	1.05978e-06	2.77938e-06	2.68423e-06	5.01343e-06	3.95949e-06	4.56611e-06	1.59222e-06	8.61181e-06	6.27043e-06	2.42689e-06
Mortierellomycetes	2.97407e-06	3.97795e-06	4.04152e-06	1.69583e-06	4.71192e-06	2.76881e-06	2.54584e-06	6.06332e-06	9.46106e-06	9.23468e-06	3.64293e-06	1.03949e-05	4.78439e-06	1.55866e-05	2.93663e-06	6.83685e-06	5.26715e-06	1.19842e-05	1.15195e-05	1.27791e-05	4.93669e-06	3.04948e-05	1.7917e-05	9.601e-06
Mucoromycetes	1.17356e-05	1.55827e-05	1.67521e-05	9.64353e-06	1.88488e-05	1.44954e-05	1.07559e-05	2.46979e-05	3.95383e-05	4.82657e-05	2.24648e-05	4.12213e-05	2.94603e-05	7.74997e-05	2.33007e-05	2.30741e-05	4.43188e-05	4.86308e-05	6.24583e-05	8.51815e-05	3.39086e-05	0.00013595	8.5015e-05	3.80085e-05
Nanohaloarchaea	4.46669e-07	3.225e-07	7.07426e-07	3.28761e-07	2.3998e-07	3.4558e-07	0	4.74852e-08	2.9191e-07	1.20957e-06	3.27023e-07	4.83464e-07	2.74101e-07	2.36323e-07	3.52019e-07	5.15528e-07	1.38475e-07	2.75365e-07	1.07057e-07	9.81393e-07	6.21125e-07	1.91385e-06	6.85599e-07	6.03697e-07
Negativicutes	5.71073e-05	7.0246e-05	7.10269e-05	7.67065e-05	6.31425e-05	7.01331e-05	6.70174e-05	6.92494e-05	6.83543e-05	6.47228e-05	6.48516e-05	6.46642e-05	6.84175e-05	6.44299e-05	6.36179e-05	6.28338e-05	6.44732e-05	5.43382e-05	5.32972e-05	4.95069e-05	6.77425e-05	5.35815e-05	5.38421e-05	6.85401e-05
Neocallimastigomycetes	1.25355e-06	1.16294e-06	1.91508e-06	1.35563e-06	4.07996e-06	2.80961e-06	1.66858e-06	3.86775e-06	4.63891e-06	7.41686e-06	2.92122e-06	8.51881e-06	6.30825e-06	1.35735e-05	3.98654e-06	5.07415e-06	4.57372e-06	9.10923e-06	1.2016e-05	1.42792e-05	4.58179e-06	2.86959e-05	1.98259e-05	7.36227e-06
Neolectomycetes	0	0	0	0	4.0751e-08	0	0	5.22435e-07	1.41693e-06	6.48029e-07	4.75252e-07	6.98793e-07	6.61943e-07	2.76361e-06	4.93123e-07	6.02088e-07	9.95213e-07	7.94628e-07	9.66462e-07	2.3713e-06	2.32272e-07	4.7295e-06	3.48433e-06	3.10288e-07
Nitriliruptoria	0.000260856	0.000268381	0.000251775	0.000295278	0.000349318	0.000363253	0.000356551	0.000357514	0.00039336	0.000388919	0.000361113	0.000370947	0.000325821	0.000377652	0.000363793	0.000341161	0.00049943	0.000520406	0.000528606	0.00047661	0.000295642	0.000407205	0.000369039	0.000305404
Nitrososphaeria	0.0010066	0.000982752	0.000849081	0.000893048	0.00118001	0.00138321	0.00118481	0.00120947	0.00110577	0.00110534	0.00161299	0.00161645	0.00103702	0.000967596	0.000821837	0.00117721	0.00144651	0.00159984	0.00182959	0.0016635	0.00188688	0.00161761	0.00151401	0.00179222
Nitrospinia	1.82918e-05	2.2173e-05	2.30099e-05	1.73311e-05	1.93698e-05	1.84955e-05	2.32649e-05	1.6901e-05	1.88935e-05	1.84878e-05	2.20002e-05	2.0445e-05	1.87316e-05	1.57761e-05	2.18012e-05	1.73499e-05	2.00349e-05	2.12849e-05	2.48921e-05	1.91452e-05	2.16171e-05	1.5044e-05	1.28337e-05	1.66378e-05
Nitrospira	0.00659868	0.00612011	0.00604501	0.0057103	0.00467079	0.00537193	0.00460558	0.00494411	0.00503827	0.00491033	0.00548497	0.00518772	0.00619267	0.00578658	0.00553924	0.00608195	0.00528882	0.0044175	0.00493163	0.00465049	0.00770708	0.00634654	0.00635625	0.00686397
Oligoflexia	0.000150082	0.000218814	0.000224077	0.000218074	0.000203557	0.000187596	0.000198154	0.000180373	0.000203573	0.000191535	0.000206187	0.000196423	0.000236312	0.000191919	0.00023741	0.000249478	0.000184863	0.000209644	0.000201527	0.000182327	0.000179256	0.000158916	0.000174876	0.000204907
Oligosphaeria	6.17391e-07	6.87738e-07	5.16164e-07	4.11099e-07	8.26724e-07	1.10246e-06	5.20745e-07	2.01593e-07	0	1.4992e-07	2.03692e-07	6.64236e-07	4.37756e-07	5.10116e-07	9.19702e-07	7.34513e-07	0	8.69233e-07	0	6.72626e-07	1.1031e-07	0	4.12551e-07	2.37608e-07
Olpidiomycetes	8.24545e-08	0	7.03418e-08	0	0	0	0	7.07799e-08	0	2.20578e-07	0	2.63237e-07	0	3.2037e-07	0	0	0	2.12898e-07	1.06552e-07	4.11015e-07	0	6.69518e-07	6.11977e-07	1.96072e-07
Opitutae	0.00272484	0.00339778	0.0032892	0.00331055	0.00270826	0.00299806	0.00236981	0.00288279	0.00365587	0.00412954	0.00355587	0.00322889	0.00478448	0.00315427	0.00385454	0.00413181	0.0036965	0.004027	0.00382605	0.00395216	0.00300171	0.00262651	0.00274513	0.00294622
Orbiliomycetes	4.16728e-06	3.6582e-06	5.91021e-06	4.1e-06	7.98118e-06	5.23468e-06	5.49335e-06	5.8376e-06	6.47256e-06	5.81946e-06	5.66691e-06	4.68616e-06	6.062e-06	9.21564e-06	3.71744e-06	7.20775e-06	3.18842e-06	4.32966e-06	2.79385e-06	5.58188e-06	3.18498e-06	6.39529e-06	3.19101e-06	3.51229e-06
Oscillatoriophycideae	0.000966325	0.000948337	0.00101327	0.00101269	0.0010234	0.00125511	0.00114579	0.000902663	0.000953921	0.000999656	0.00108606	0.00100712	0.00094565	0.000871228	0.000973322	0.000961824	0.000957252	0.000908766	0.000905477	0.000913443	0.00101162	0.000874638	0.000881114	0.00098314
Pezizomycetes	1.84245e-06	3.48513e-06	2.51905e-06	2.02622e-06	4.23531e-06	1.69033e-06	2.45476e-06	3.9258e-06	3.7949e-06	4.24821e-06	2.40058e-06	6.82826e-06	3.6071e-06	1.15836e-05	2.63679e-06	4.77389e-06	5.23774e-06	6.23528e-06	5.95832e-06	1.09568e-05	2.65782e-06	1.25547e-05	6.14894e-06	3.70997e-06
Phycisphaerae	0.0069778	0.00852439	0.00887326	0.00886779	0.00941755	0.00915617	0.00865788	0.0080954	0.0060798	0.00707062	0.00630884	0.00662113	0.00743316	0.00699314	0.00751738	0.00749446	0.0044034	0.00398872	0.00408116	0.00394317	0.00547708	0.00416489	0.0045522	0.00505068
Pisoniviricetes	0	0	0	0	0	0	0	0	0	9.03623e-07	0	0	0	9.84324e-08	0	0	1.41151e-07	0	1.63689e-07	0	0	0	0	0
Planctomycetia	0.00429926	0.0051768	0.00523351	0.0055348	0.00523674	0.00506072	0.00488717	0.0047737	0.0043173	0.00461771	0.00466074	0.00452682	0.00486063	0.00423912	0.00483778	0.00499148	0.00381006	0.00358281	0.00486642	0.00336161	0.00381839	0.00306036	0.00332057	0.00377212
Pneumocystidomycetes	1.3045e-07	1.83443e-07	3.0228e-07	8.82639e-08	2.95887e-07	2.38856e-07	1.50648e-07	5.92616e-07	2.6446e-07	1.02363e-06	3.81105e-07	1.53248e-06	6.0408e-07	2.73035e-06	1.13933e-06	1.07291e-07	6.86156e-07	7.23236e-07	2.25395e-06	2.17588e-06	7.15259e-07	4.51872e-06	1.65277e-06	8.4803e-07
Pokkesviricetes	0	3.52929e-06	0	0	0	0	0	0	0	0	0	0	0	0	0	0	0	3.22388e-07	0	5.97762e-07	0	1.19353e-07	0	0
Pucciniomycetes	8.03606e-06	3.92349e-06	1.62324e-05	2.15071e-06	1.52106e-05	7.52653e-06	3.00046e-06	3.22153e-05	3.91949e-05	6.7143e-05	2.00849e-05	8.10153e-05	4.04184e-05	0.000143347	2.9829e-05	4.29511e-05	6.02025e-05	8.53567e-05	0.000110039	0.000152598	3.89415e-05	0.000238406	0.000160972	6.0654e-05
Repensiviricetes	0	0	0	0	7.01589e-08	9.52834e-08	0	0	9.34741e-07	3.11846e-07	0	2.12897e-07	2.13762e-07	8.53965e-07	1.40799e-07	0	1.00406e-07	1.16325e-07	3.44704e-07	5.39218e-07	2.36242e-07	1.64898e-06	1.7389e-05	2.68943e-06
Revtraviricetes	1.90464e-05	1.22695e-05	4.457e-05	5.17113e-06	3.63477e-05	2.39187e-05	6.83291e-06	8.91464e-05	0.000122359	0.000198018	4.79072e-05	0.000224878	0.000127282	0.000433508	7.86192e-05	0.000125627	0.000216025	0.000283771	0.000333266	0.000500815	0.000124335	0.000834003	0.000513108	0.000182568
Rhodothermia	9.47403e-05	8.88132e-05	0.000107434	0.000104293	0.000105857	9.32466e-05	9.50416e-05	8.60616e-05	9.92598e-05	0.00010148	0.000106831	0.000104351	0.000104407	8.87529e-05	0.000106032	0.000103624	0.000106226	9.50243e-05	9.20285e-05	8.53972e-05	0.000117195	0.000100119	0.000100208	0.000106137
Rubrobacteria	0.000858833	0.000972122	0.000900448	0.000927614	0.000966163	0.000963573	0.000996746	0.000993242	0.000997551	0.00102936	0.00102636	0.000985444	0.00107893	0.000976158	0.00109052	0.00103532	0.000849275	0.000739232	0.00138897	0.000754681	0.000908285	0.000796888	0.000934313	0.000947159
Saccharomycetes	3.07985e-05	2.82085e-05	2.64022e-05	2.59419e-05	3.01003e-05	3.05054e-05	2.46833e-05	3.57759e-05	2.63936e-05	3.25604e-05	2.19091e-05	3.30791e-05	2.43557e-05	5.51641e-05	1.9333e-05	2.53184e-05	2.3766e-05	2.73679e-05	2.7674e-05	4.43649e-05	1.42287e-05	8.20658e-05	4.26394e-05	1.52581e-05
Saprospiria	0.000172395	0.000153217	0.000194428	0.000158915	0.0001292	0.00014592	0.000140271	0.000119341	0.000257821	0.000261962	0.000268171	0.000261821	0.000272463	0.000178615	0.000272674	0.000211081	0.000365046	0.00043103	0.000434109	0.000328554	0.000283706	0.000225448	0.000192456	0.000270307
Schizosaccharomycetes	5.7322e-07	2.46501e-07	0	2.48242e-07	1.9444e-07	3.50262e-07	3.24892e-07	3.43189e-07	2.85618e-07	1.27151e-06	0	1.90585e-06	1.59655e-06	3.29377e-06	1.44868e-06	5.25735e-07	1.78321e-06	3.59935e-06	1.48825e-06	2.96607e-06	1.39598e-06	5.01643e-06	5.02757e-06	1.55046e-06
Sordariomycetes	3.48968e-05	4.1322e-05	4.71112e-05	4.04661e-05	4.80546e-05	4.69075e-05	8.59482e-05	7.31387e-05	8.07279e-05	8.68287e-05	0.000112049	9.00033e-05	6.79397e-05	0.000152359	5.41175e-05	8.0625e-05	6.85376e-05	0.000104154	0.000109052	0.000149533	5.40555e-05	0.000218163	0.000152921	6.80333e-05
Spartobacteria	0.0046124	0.00417278	0.00433886	0.00379138	0.00508238	0.00482261	0.0053581	0.00491985	0.00315198	0.00332817	0.00320344	0.00330684	0.00382986	0.00357966	0.00372421	0.00339138	0.0021838	0.00201128	0.0017738	0.00206572	0.00358312	0.00282778	0.00341548	0.0036147
Sphingobacteriia	0.0024953	0.00322369	0.00353701	0.00259984	0.00321106	0.0032433	0.0034803	0.00336974	0.00279154	0.00335765	0.0027015	0.0033882	0.00374424	0.00479359	0.0032981	0.00371845	0.00379035	0.00365293	0.00395715	0.00524766	0.00341322	0.00496715	0.00417177	0.00347014
Spirochaetia	0.000130335	0.000163564	0.000167189	0.000175666	0.000151037	0.000153217	0.000157338	0.000137794	0.000154279	0.000150075	0.000157235	0.000156395	0.000171559	0.000139762	0.000174649	0.000166509	0.000162398	0.000153785	0.000141877	0.000129386	0.00016249	0.000124251	0.000130744	0.000143858
Synergistia	2.16945e-05	2.0642e-05	2.48068e-05	2.16988e-05	2.18524e-05	1.96343e-05	2.30037e-05	2.01165e-05	1.94157e-05	1.95741e-05	2.46592e-05	2.19701e-05	1.987e-05	2.11064e-05	1.829e-05	2.31758e-05	2.05312e-05	2.29638e-05	1.73953e-05	1.75291e-05	2.07872e-05	1.37582e-05	1.78791e-05	2.3093e-05
Taphrinomycetes	0	0	0	2.80368e-07	3.37196e-07	0	2.86418e-07	5.42436e-07	1.50833e-07	4.16545e-07	0	4.87893e-07	2.62653e-07	7.20987e-07	6.59315e-08	4.56411e-07	7.29952e-07	1.21329e-07	3.74503e-07	1.66429e-06	3.85562e-07	4.02169e-06	1.72775e-06	2.88016e-07
Tectiliviricetes	1.93275e-06	1.12303e-05	5.49484e-06	5.43001e-06	1.25978e-05	1.46585e-05	9.62259e-06	1.12453e-05	9.60026e-06	4.32567e-06	2.22637e-06	4.858e-06	5.59179e-06	6.77996e-06	2.28072e-06	4.71628e-06	8.4341e-07	5.3347e-06	5.2633e-07	8.74507e-07	1.90926e-05	2.39856e-06	4.37529e-06	6.50168e-06
Tepidiformia	8.79792e-05	7.56281e-05	8.43288e-05	6.54255e-05	4.42658e-05	4.95695e-05	4.42908e-05	4.12384e-05	0.000145502	0.000151794	0.000169944	0.000158165	0.000121539	9.84846e-05	0.000146936	0.000116234	0.000147234	0.00013459	0.000136416	0.000127042	0.000133469	0.000104668	0.000126032	0.000135034
Terrimicrobia	1.1675e-05	2.2304e-05	1.07487e-05	1.84947e-05	1.92806e-05	1.92395e-05	1.917e-05	1.81789e-05	1.42088e-05	1.34982e-05	1.21838e-05	1.49995e-05	1.24329e-05	1.1217e-05	1.43875e-05	1.41265e-05	1.59292e-05	1.95201e-05	1.31515e-05	1.1728e-05	1.09378e-05	8.31996e-06	1.05005e-05	1.05622e-05
Theionarchaea	7.9794e-06	5.49286e-06	4.94944e-06	7.98056e-06	8.65325e-06	5.61834e-06	6.10808e-06	7.39811e-06	8.04529e-06	8.99843e-06	1.00416e-05	1.20961e-05	1.09017e-05	6.85369e-06	7.67697e-06	6.00322e-06	1.0559e-05	6.69074e-06	7.68519e-06	5.01443e-06	1.03697e-05	7.34844e-06	6.45903e-06	9.6318e-06
Thermoanaerobaculia	0.000261212	0.000192323	0.00027602	0.000235658	0.000218884	0.000205688	0.000203973	0.000193341	0.000397448	0.000470636	0.000446613	0.000391661	0.000304429	0.000241151	0.000414061	0.000332492	0.000423947	0.000425133	0.000392402	0.000350726	0.000391455	0.000376457	0.000375079	0.000420971
Thermococci	1.41699e-05	1.35773e-05	1.19253e-05	1.52307e-05	1.60334e-05	1.63432e-05	1.24764e-05	1.43696e-05	1.21559e-05	1.66448e-05	1.73961e-05	1.39605e-05	1.33609e-05	1.40359e-05	1.32439e-05	1.60795e-05	1.32153e-05	1.22719e-05	1.39789e-05	1.02779e-05	1.36051e-05	1.38298e-05	1.33374e-05	1.72849e-05
Thermodesulfobacteria	2.5814e-05	2.67176e-05	2.65085e-05	2.90163e-05	3.39774e-05	3.19255e-05	3.04084e-05	2.70696e-05	2.03356e-05	2.27638e-05	2.31203e-05	2.00535e-05	2.96805e-05	2.27249e-05	2.37735e-05	2.42065e-05	1.75075e-05	1.97128e-05	2.26142e-05	1.58243e-05	2.0533e-05	1.92065e-05	1.71519e-05	2.00489e-05
Thermoflexia	3.32777e-05	3.41206e-05	3.6751e-05	3.36746e-05	3.21026e-05	3.45417e-05	3.06777e-05	2.93974e-05	3.71213e-05	3.34099e-05	4.29557e-05	3.67886e-05	4.02543e-05	3.40642e-05	4.14794e-05	3.86566e-05	3.44813e-05	3.54496e-05	3.26041e-05	3.39081e-05	3.44338e-05	2.10502e-05	2.69567e-05	3.21883e-05
Thermoleophilia	0.00398261	0.00503087	0.00416815	0.00452658	0.00559953	0.00582473	0.00589188	0.00591584	0.00579376	0.00601682	0.00551564	0.00550869	0.00621013	0.00605578	0.0065036	0.00651698	0.00532492	0.00454598	0.00587043	0.00518961	0.0054197	0.0061267	0.0066333	0.00653432
Thermomicrobia	0.000539138	0.000772707	0.000535788	0.000696803	0.000624778	0.000617683	0.000635101	0.000607393	0.000550773	0.000614845	0.000561037	0.000613821	0.000758574	0.000798263	0.000715318	0.00070309	0.000468159	0.000458073	0.000480279	0.000493578	0.00049712	0.000540613	0.000519539	0.000511187
Thermoplasmata	4.58471e-05	5.12334e-05	4.64362e-05	6.468e-05	5.70559e-05	5.11989e-05	5.01146e-05	4.71678e-05	4.83313e-05	6.44768e-05	6.86878e-05	5.84506e-05	5.78501e-05	5.61545e-05	6.0998e-05	6.31226e-05	3.88167e-05	3.85628e-05	4.12568e-05	3.87487e-05	5.20335e-05	4.06147e-05	3.6951e-05	4.2626e-05
Thermoprotei	1.82564e-05	2.23076e-05	2.04207e-05	2.02839e-05	2.00498e-05	1.81774e-05	1.97758e-05	1.53756e-05	2.07593e-05	1.98018e-05	1.87516e-05	1.7276e-05	1.57012e-05	1.77091e-05	2.2327e-05	2.60409e-05	1.96256e-05	1.68068e-05	1.83356e-05	1.81081e-05	1.41212e-05	1.51294e-05	1.33561e-05	1.83251e-05
Thermotogae	1.98441e-05	2.69953e-05	2.6748e-05	2.57597e-05	2.6481e-05	2.13202e-05	2.51452e-05	2.0704e-05	2.27359e-05	2.75664e-05	3.13604e-05	2.56491e-05	2.26934e-05	2.06921e-05	2.18389e-05	2.21836e-05	2.38371e-05	2.40532e-05	2.22649e-05	2.04409e-05	1.9852e-05	1.71553e-05	1.89993e-05	1.97598e-05
Tissierellia	1.12464e-05	1.61484e-05	1.47395e-05	1.69545e-05	9.96603e-06	1.19774e-05	8.54293e-06	1.1524e-05	2.18758e-05	2.28985e-05	1.44989e-05	2.63706e-05	2.2151e-05	3.94922e-05	1.83187e-05	2.24859e-05	2.37699e-05	3.0059e-05	2.8686e-05	4.14058e-05	1.57944e-05	7.36999e-05	4.17519e-05	2.23057e-05
Tremellomycetes	0.000655349	0.000656432	0.000562909	0.000607191	0.000617993	0.000623681	0.000568326	0.000650912	0.000676128	0.000741359	0.000651008	0.000622335	0.000721326	0.000662616	0.000598292	0.000733979	1.14554e-05	1.37796e-05	1.52451e-05	2.43914e-05	7.97408e-06	3.6267e-05	2.17956e-05	1.20324e-05
Ustilaginomycetes	1.59927e-06	1.61387e-06	5.18825e-07	2.25408e-06	3.13149e-06	1.56188e-06	2.24625e-06	3.76865e-06	4.02984e-06	5.45287e-06	2.58245e-06	5.57823e-06	2.66554e-06	1.34716e-05	2.10413e-06	2.64474e-06	4.91617e-06	6.5496e-06	5.08029e-06	1.05778e-05	2.47619e-06	1.98193e-05	8.97594e-06	3.10307e-06
Verrucomicrobiae	0.00754116	0.00943609	0.00808993	0.00947833	0.00806634	0.00773884	0.00652211	0.00754268	0.00610746	0.00642166	0.00645262	0.00634269	0.00663473	0.00618931	0.00677854	0.00805574	0.00620012	0.0060486	0.00589873	0.00543687	0.00488495	0.00382593	0.00398843	0.00463111
Vicinamibacteria	0.00672292	0.00502994	0.00598563	0.00605308	0.00511554	0.00495784	0.00515551	0.00481785	0.00645996	0.00624705	0.00686635	0.00638499	0.00579867	0.00472602	0.00603544	0.00542358	0.00840588	0.00850052	0.00794828	0.00748908	0.00758782	0.0062531	0.0060965	0.00690115
Wallemiomycetes	2.55808e-06	1.95014e-06	1.58939e-06	2.03615e-06	3.25833e-06	2.62383e-06	2.18214e-06	2.61102e-06	1.7861e-06	3.26307e-06	2.12295e-06	2.60077e-06	2.45414e-06	3.76075e-06	1.93237e-06	2.1806e-06	8.21533e-07	2.34702e-06	1.73691e-06	2.5056e-06	1.12793e-06	2.04594e-06	1.12276e-06	9.51583e-07
Zetaproteobacteria	9.87707e-05	9.03269e-05	9.56528e-05	9.43038e-05	8.29439e-05	8.26233e-05	7.80601e-05	7.20598e-05	9.11381e-05	8.55952e-05	0.000103079	9.7757e-05	8.85699e-05	7.56666e-05	8.70027e-05	8.9802e-05	8.86969e-05	8.066e-05	7.67756e-05	7.82507e-05	8.98104e-05	7.3808e-05	8.17691e-05	8.3883e-05
Zoopagomycetes	7.28542e-07	2.44604e-06	1.13057e-06	2.28791e-06	1.95038e-06	2.57222e-07	4.86939e-07	3.58751e-06	2.81166e-06	4.69077e-06	1.14367e-06	5.47033e-06	3.35044e-06	7.05859e-06	2.77333e-06	3.38149e-06	5.07872e-06	5.87262e-06	9.68373e-06	7.10904e-06	2.27738e-06	1.96072e-05	9.55748e-06	2.00758e-06
unclassified	0.369965	0.328573	0.339732	0.353449	0.327269	0.332513	0.322394	0.304894	0.340489	0.351364	0.379009	0.358045	0.343636	0.300082	0.356672	0.342185	0.36073	0.336758	0.348962	0.318508	0.376952	0.308967	0.312336	0.352878
