# Supplementary material
Source: MDPI journal article supplement (https://www.mdpi.com/2073-4395/14/3/635)
Supplement: s1 [file s1 › Table S6.xlsx]

## Sheet: Sheet1
Table S6.	Relative species abundance of 24 samples at the order level
order	AIP1	AIP2	AIP3	AIP4	AMP1	AMP2	AMP3	AMP4	BIP1	BIP2	BIP3	BIP4	BMP1	BMP2	BMP3	BMP4	CIP1	CIP2	CIP3	CIP4	CMP1	CMP2	CMP3	CMP4
Abditibacteriales	2.26004e-05	2.69406e-05	2.91604e-05	3.37977e-05	3.91308e-05	3.41317e-05	3.88391e-05	2.59602e-05	2.28656e-05	2.46291e-05	2.54395e-05	2.423e-05	2.60124e-05	2.14731e-05	2.58134e-05	2.72463e-05	1.87773e-05	2.13817e-05	1.85146e-05	2.23879e-05	2.37734e-05	2.00087e-05	1.96391e-05	1.93745e-05
Acholeplasmatales	1.90261e-06	2.98901e-06	3.48169e-06	2.40091e-06	4.35497e-06	4.03919e-06	4.41945e-06	2.41002e-06	2.64136e-06	2.89532e-06	3.51948e-06	2.24408e-06	4.39634e-06	3.55495e-06	2.85445e-06	3.46364e-06	4.37364e-06	6.16856e-06	5.21611e-06	2.87375e-06	3.41276e-06	3.64501e-06	4.41499e-06	3.98378e-06
Acidaminococcales	5.04428e-06	4.28744e-06	3.9693e-06	6.62298e-06	5.85285e-06	6.62541e-06	4.41015e-06	5.52589e-06	7.38516e-06	3.81839e-06	5.1008e-06	5.12781e-06	6.22961e-06	6.0314e-06	4.56205e-06	4.61349e-06	4.8655e-06	5.39242e-06	4.18418e-06	4.02713e-06	4.76587e-06	4.70938e-06	4.45543e-06	6.1537e-06
Acidiferrobacterales	0.000133759	0.000122695	0.00012037	0.000125618	0.000114582	0.000115292	0.000114268	0.000112629	0.000150429	0.000146517	0.000138445	0.000131788	0.000134668	0.000108158	0.000126889	0.000135211	0.000142708	0.000139982	0.000154431	0.000162418	0.000117857	0.000102998	0.000108946	0.000125617
Acidilobales	1.83636e-06	1.8304e-06	1.8586e-06	1.21279e-06	5.3336e-07	2.34351e-07	9.4277e-07	5.57207e-07	1.73089e-06	1.34892e-06	1.08387e-06	2.71012e-07	6.48079e-07	9.12621e-07	1.74053e-06	8.7266e-07	1.0476e-06	1.83042e-06	1.53003e-06	1.50731e-06	1.8018e-06	1.24326e-06	2.46091e-06	3.40586e-07
Acidimicrobiales	0.00173287	0.00149121	0.0016501	0.00191485	0.00244624	0.00242283	0.00233914	0.00224071	0.00272842	0.00276967	0.00256066	0.00257483	0.0022104	0.00196273	0.00246143	0.00208725	0.00401895	0.00365019	0.0039248	0.00357884	0.00212875	0.00195036	0.00196769	0.00225757
Acidithiobacillales	0.000109397	0.000107613	0.00010216	0.000116097	0.00010294	0.000102168	0.000101239	0.000106101	0.000103095	0.000102466	0.000107971	0.000107575	0.000109955	9.7242e-05	0.000106915	0.00010706	9.75759e-05	8.85662e-05	0.000101843	9.02717e-05	0.000102351	7.59037e-05	8.5919e-05	9.4352e-05
Acidobacteriales	0.00968528	0.0158331	0.0114129	0.0103378	0.0163948	0.0169219	0.0162601	0.0214712	0.00491652	0.00515738	0.00458823	0.00503147	0.00832069	0.00812975	0.00728565	0.00991143	0.00446889	0.00438137	0.00488023	0.00446227	0.00393118	0.0034422	0.0041989	0.00440635
Acidothermales	6.60004e-05	0.000115265	8.15178e-05	0.000105351	0.00023546	0.000236949	0.000264218	0.000234864	6.26804e-05	7.2194e-05	5.87375e-05	5.75998e-05	6.72583e-05	9.50242e-05	7.56034e-05	7.93019e-05	4.79951e-05	4.77491e-05	4.09535e-05	3.54113e-05	4.73057e-05	4.30221e-05	4.65521e-05	4.37676e-05
Acrospermales	1.07903e-07	0	1.08061e-07	0	5.16867e-07	1.11854e-07	5.6503e-07	4.00142e-07	1.99115e-07	0	0	8.61207e-08	0	0	5.46163e-07	1.84704e-07	0	2.91817e-07	0	0	1.14608e-07	8.34604e-07	0	8.27633e-08
Actinomycetales	0.000104925	0.00010517	9.81239e-05	0.000115064	0.00013578	0.000135229	0.000151308	0.000134058	0.000121032	0.000128895	0.000130426	0.000127041	0.000155226	0.000144945	0.000139812	0.000138936	0.000130794	0.000142244	0.000140803	0.000134925	0.000108283	9.38036e-05	0.000106342	0.000121083
Actinopolysporales	7.27037e-06	9.81465e-06	9.94027e-06	9.51941e-06	1.13462e-05	1.70894e-05	1.61805e-05	1.58161e-05	1.35963e-05	1.30484e-05	1.80501e-05	1.09325e-05	1.22894e-05	1.33487e-05	1.32569e-05	1.26628e-05	7.91275e-06	9.99421e-06	7.48812e-06	8.19417e-06	9.396e-06	6.84572e-06	7.82376e-06	8.3686e-06
Aeromonadales	0.000111977	0.000210493	0.000256727	4.73913e-05	7.55571e-05	5.30198e-05	5.05799e-05	7.17739e-05	0.000166561	0.000206129	6.58777e-05	0.000106981	6.21698e-05	7.75924e-05	6.09472e-05	5.81324e-05	6.56011e-05	0.000127298	6.73836e-05	8.27084e-05	6.59682e-05	9.53515e-05	8.61787e-05	6.26505e-05
Agaricales	2.05892e-05	3.74204e-05	2.29738e-05	2.46348e-05	2.35081e-05	2.1371e-05	1.92252e-05	3.15586e-05	3.16023e-05	4.63999e-05	3.18868e-05	4.61849e-05	3.7408e-05	7.75834e-05	3.05259e-05	3.30917e-05	4.06775e-05	5.3928e-05	5.82076e-05	7.86149e-05	5.72727e-05	0.000142786	8.28114e-05	3.6217e-05
Algavirales	2.51415e-07	9.93492e-07	1.0076e-07	1.11665e-06	8.61444e-08	8.42157e-07	0	8.16648e-07	1.63811e-07	1.16837e-06	7.67228e-07	1.08107e-06	6.97825e-07	1.39553e-06	2.68065e-07	2.4736e-07	1.03442e-06	8.79956e-07	1.09007e-06	1.11633e-06	6.38513e-07	1.4038e-06	7.1493e-07	1.85543e-06
Alteromonadales	0.000301721	0.000336631	0.000352381	0.000348821	0.000315412	0.000329166	0.000355746	0.00036299	0.000383251	0.000401004	0.000378889	0.000402437	0.000373814	0.000457839	0.000345548	0.00037532	0.000401927	0.000459038	0.000437118	0.000496095	0.000386064	0.000497225	0.000450681	0.00035813
Amarillovirales	4.92833e-07	3.19677e-07	0	0	2.26774e-07	0	1.25765e-07	0	5.38111e-07	5.44725e-07	2.62727e-07	2.62529e-07	3.38908e-07	4.39205e-07	2.76411e-07	7.40407e-07	0	3.9626e-07	0	0	1.14153e-07	0	1.24064e-07	5.1781e-07
Amylocorticiales	3.72932e-07	4.15807e-07	4.21773e-07	0	7.08897e-08	0	1.93392e-07	1.64894e-07	1.60399e-07	9.28448e-07	5.8012e-07	5.39153e-07	2.18878e-07	1.70871e-07	4.04243e-07	5.89303e-07	5.23534e-07	6.48065e-07	4.96464e-07	8.98777e-07	6.67115e-07	1.8362e-07	6.54172e-07	0
Anaerolineales	0.00371487	0.00254042	0.00325571	0.00294283	0.00189643	0.00206233	0.00189584	0.00197049	0.00573441	0.00613683	0.00747175	0.00640753	0.00480143	0.00357919	0.0054715	0.0041611	0.00691795	0.00680311	0.00667422	0.00625992	0.00569783	0.00474181	0.00476482	0.00558452
Anaeroplasmatales	0	6.85916e-08	4.53858e-07	8.61379e-08	0	0	0	0	0	0	6.55356e-08	2.42636e-07	0	2.95297e-07	4.21881e-07	6.34418e-08	3.38762e-07	0	0	0	0	0	0	0
Anoxychlamydiales	0	1.59026e-06	7.00179e-07	6.0276e-07	3.21612e-07	5.40594e-07	2.47828e-06	1.54254e-06	1.75582e-06	1.62874e-06	1.35515e-07	1.06495e-06	5.64981e-06	6.03687e-06	3.86672e-06	7.07137e-06	6.04639e-07	1.215e-06	5.44914e-07	9.11912e-07	1.21021e-06	6.18235e-07	8.82436e-07	0
Apansporoblastina	4.19476e-07	4.28947e-07	1.75248e-06	6.77768e-07	1.41956e-06	1.35786e-06	5.11874e-07	1.17464e-06	1.27093e-06	3.26562e-06	1.06466e-06	2.42072e-06	5.2985e-06	1.18162e-05	2.37639e-06	3.05582e-06	3.0211e-06	4.04101e-06	4.47021e-06	8.00369e-06	8.67951e-06	1.09216e-05	5.75017e-06	3.14416e-06
Aquificales	3.17119e-05	2.51876e-05	3.10063e-05	3.00076e-05	3.03495e-05	3.14469e-05	3.03733e-05	2.73749e-05	2.47494e-05	2.42423e-05	2.71759e-05	2.51897e-05	2.88407e-05	2.5896e-05	2.90239e-05	2.60208e-05	2.07552e-05	1.50154e-05	2.0444e-05	1.92386e-05	2.78627e-05	1.82595e-05	1.93057e-05	1.95221e-05
Archaeoglobales	1.15831e-05	9.29983e-06	7.53455e-06	9.96396e-06	1.14102e-05	9.24415e-06	1.28559e-05	9.5181e-06	1.06475e-05	9.29812e-06	8.03829e-06	9.32597e-06	7.62596e-06	9.38664e-06	9.44674e-06	9.89119e-06	6.36515e-06	4.05483e-06	6.88611e-06	7.38891e-06	6.70561e-06	6.54985e-06	7.18535e-06	9.26835e-06
Ardenticatenales	0.000112243	0.000114223	0.000112594	0.000120847	0.000108564	9.86859e-05	0.000103038	9.95149e-05	0.00013776	0.000146591	0.000167549	0.00014425	0.000138885	0.000126679	0.000146719	0.000120082	0.000132393	0.000129166	0.00013435	0.000123146	0.000132296	0.000110273	0.000106701	0.000120414
Arenicellales	1.70925e-06	2.09824e-06	1.75172e-06	2.06605e-06	1.32211e-06	2.16955e-06	1.30062e-06	2.83893e-06	1.95713e-06	3.08344e-06	3.89902e-06	1.86406e-06	1.54973e-06	2.06958e-06	1.18409e-06	2.32928e-06	1.96001e-06	4.75883e-06	3.14311e-06	3.15829e-06	1.4867e-06	1.66986e-06	1.49374e-06	2.34816e-06
Armatimonadales	9.47565e-05	0.000136493	0.00013202	0.00014912	0.000199134	0.000209405	0.000212912	0.000185448	0.000136668	0.000134956	0.000149507	0.000147491	0.00013049	0.000113757	0.000160343	0.000140554	8.13438e-05	7.784e-05	7.15742e-05	6.92592e-05	0.00012973	7.94892e-05	0.000112445	0.000138171
Arthoniales	0	0	8.98342e-08	0	0	0	2.50926e-07	9.03936e-08	0	0	0	2.52136e-07	0	2.45488e-07	0	0	0	0	0	0	1.06323e-07	0	0	0
Atheliales	3.01008e-07	9.89682e-07	3.46264e-07	5.86901e-07	1.62623e-07	2.19225e-07	3.52899e-07	1.13561e-07	1.26995e-06	9.04973e-07	7.4636e-07	9.95541e-07	1.39407e-07	2.31071e-06	1.2489e-06	1.13607e-06	2.63276e-07	9.98546e-08	8.13291e-07	1.20797e-06	2.33242e-07	8.28913e-07	7.39983e-07	6.6376e-07
Aulographales	0	8.20373e-07	0	0	0	3.1289e-07	5.80658e-07	0	0	1.06764e-07	6.76361e-07	7.4292e-07	4.63578e-07	5.33531e-07	0	0	1.39135e-07	1.61194e-07	6.01398e-07	1.4944e-07	2.9173e-07	4.77411e-07	7.69593e-07	1.11081e-06
Auriculariales	7.26485e-07	1.25988e-06	1.08741e-06	2.24956e-06	2.46673e-07	4.30832e-07	3.85538e-07	9.23665e-07	2.60343e-06	2.1043e-06	4.10738e-06	1.59568e-06	1.52849e-06	3.0261e-06	9.84755e-07	5.44389e-07	1.54807e-06	1.85911e-06	2.25084e-06	4.48113e-06	2.24336e-06	5.41981e-06	3.8452e-06	1.81107e-06
Bacillales	0.00139185	0.00162661	0.00177325	0.00132744	0.00177691	0.00143612	0.00167205	0.00184165	0.00218403	0.00279004	0.00157722	0.00278097	0.0021746	0.0042319	0.00192692	0.00209426	0.0024849	0.00347477	0.00323607	0.00426524	0.00189813	0.00593479	0.00436978	0.00238317
Bacteriovoracales	1.45558e-05	1.61966e-05	2.17788e-05	2.15496e-05	1.56038e-05	1.53132e-05	1.70954e-05	1.56105e-05	1.97609e-05	1.68884e-05	2.19402e-05	1.91222e-05	2.10609e-05	1.93387e-05	2.34733e-05	2.25097e-05	1.61334e-05	2.14767e-05	1.53297e-05	1.94558e-05	1.93603e-05	1.78455e-05	1.9328e-05	2.60882e-05
Bacteroidales	0.000341807	0.000383754	0.000398495	0.000399039	0.000348406	0.000379251	0.00035242	0.000349965	0.000392367	0.000426199	0.000400625	0.000404542	0.000412196	0.00036132	0.000422634	0.000420425	0.000417757	0.000384285	0.000397566	0.000375263	0.000578079	0.000309136	0.000329891	0.000382357
Bacteroidetes_Order_II._Incertae_sedis	0.000239414	0.000232091	0.00023983	0.000254342	0.000239754	0.000234596	0.000243811	0.000221661	0.000223111	0.000219785	0.00025028	0.000221448	0.00024039	0.000211326	0.000252755	0.000239495	0.000244489	0.000225761	0.000226299	0.000228471	0.000270961	0.000219621	0.000237318	0.000252611
Balneolales	9.98897e-05	9.21255e-05	9.30032e-05	9.52376e-05	8.83695e-05	9.12472e-05	9.10515e-05	8.07392e-05	0.000112585	0.000116454	0.000122637	0.000108955	0.000111007	9.76589e-05	0.000108409	0.000105789	0.000111714	0.000105174	9.7014e-05	0.00011197	0.000125498	0.000105163	0.00010002	0.000130811
Bartheletiales	0	0	0	0	0	0	0	0	0	3.07648e-07	0	0	0	0	0	0	0	0	0	0	0	0	0	0
Basidiobolales	3.16809e-06	2.73557e-06	3.56714e-06	2.2284e-06	4.96374e-06	4.12084e-06	3.02379e-06	4.64303e-06	5.16647e-06	6.08719e-06	3.72058e-06	9.4851e-06	4.01858e-06	1.54505e-05	5.69429e-06	5.87276e-06	7.01491e-06	7.42362e-06	9.29899e-06	1.46268e-05	4.28977e-06	2.83094e-05	1.81228e-05	5.18206e-06
Bdellovibrionales	0.000101282	0.000151267	0.000157483	0.000152035	0.000145941	0.000134312	0.000139091	0.000124223	0.000136797	0.000135296	0.000140597	0.000132013	0.000159564	0.000124724	0.000156978	0.000167961	0.000132406	0.00014854	0.00015322	0.000130739	0.000119697	0.000110048	0.000110825	0.000142713
Bifidobacteriales	2.11763e-05	2.04612e-05	2.72557e-05	2.05463e-05	3.05104e-05	2.8299e-05	2.21361e-05	4.62266e-05	5.33133e-05	8.17914e-05	3.7621e-05	9.13253e-05	6.07199e-05	0.000169052	5.5472e-05	5.35123e-05	8.0188e-05	0.000111504	0.000121818	0.000150588	5.01898e-05	0.000258077	0.000166002	7.19879e-05
Blastocatellales	0.00819343	0.00671262	0.00794462	0.00778954	0.00744467	0.00751884	0.0078615	0.00695953	0.00794848	0.00792754	0.00997974	0.00859321	0.00656205	0.00632878	0.00739216	0.00666359	0.00975854	0.00882416	0.00848217	0.00880465	0.0113784	0.00934691	0.00905394	0.0111773
Blastocladiales	1.21391e-07	6.49183e-07	2.79853e-07	3.67912e-07	8.24607e-07	1.41811e-06	2.84141e-07	3.06733e-06	3.64231e-06	2.70026e-06	1.61667e-06	6.91486e-06	2.69737e-06	7.81101e-06	2.72214e-06	3.44445e-06	5.99086e-06	5.85993e-06	7.08894e-06	9.34943e-06	1.65844e-06	1.66246e-05	1.03038e-05	3.08325e-06
Boletales	2.83515e-06	3.05713e-06	3.82976e-06	4.76939e-06	3.46134e-06	4.23936e-06	2.74545e-06	3.36374e-06	2.84935e-06	4.65812e-06	6.94899e-06	5.57344e-06	4.4846e-06	7.31525e-06	4.33898e-06	4.44498e-06	3.44851e-06	9.19327e-06	4.68419e-06	5.91608e-06	8.72349e-06	1.61552e-05	5.46541e-06	6.11047e-06
Botryosphaeriales	9.15276e-07	1.14106e-06	1.4231e-06	9.47785e-07	1.39643e-06	2.09178e-06	3.17529e-06	1.91688e-06	1.75138e-06	1.44698e-06	2.24979e-06	2.05647e-06	1.57403e-06	8.6624e-06	1.8004e-06	1.44241e-06	1.79344e-06	2.91706e-06	3.95124e-06	6.52128e-06	2.69003e-06	5.89561e-06	3.50767e-06	1.68844e-06
Brachyspirales	1.58209e-06	1.67935e-06	7.07404e-07	1.17091e-06	1.00372e-06	1.41323e-06	1.62138e-06	1.47831e-06	2.75334e-06	2.59292e-06	1.76706e-06	2.19653e-06	2.24516e-06	7.36212e-07	1.50417e-06	1.20293e-06	7.46575e-07	2.8566e-07	3.65477e-07	4.35799e-07	9.10241e-07	7.68023e-07	1.72537e-06	1.12312e-06
Bradymonadales	8.06438e-05	8.44161e-05	8.90679e-05	0.000100995	8.4393e-05	9.51453e-05	0.0001093	8.31892e-05	8.90755e-05	7.74925e-05	7.41875e-05	8.03072e-05	9.87438e-05	8.32957e-05	0.000112252	9.59898e-05	6.64753e-05	8.09723e-05	6.46792e-05	7.0377e-05	5.94653e-05	4.52762e-05	6.34422e-05	6.25278e-05
Brevinematales	1.4189e-06	1.44277e-06	1.14265e-06	1.44575e-06	6.74629e-07	1.54353e-06	1.3078e-06	1.86268e-06	2.59504e-06	2.81615e-06	1.65532e-06	2.74014e-06	2.30644e-06	1.85903e-06	2.25398e-06	1.64267e-06	2.18595e-06	2.58267e-06	2.48184e-06	2.11682e-06	4.7426e-06	3.3525e-06	3.27132e-06	4.26214e-06
Bryobacterales	0.00688757	0.00866284	0.00730536	0.00739105	0.00921796	0.0090513	0.00866809	0.00914274	0.00461874	0.00464434	0.00518561	0.00504985	0.00548577	0.00557381	0.00532252	0.00630368	0.00378674	0.00366653	0.00359878	0.00328252	0.00381535	0.00306832	0.00323412	0.00364116
Burkholderiales	0.0349987	0.0383254	0.0328431	0.0266457	0.028352	0.027676	0.0255909	0.0395794	0.0525459	0.0218832	0.0250795	0.0239375	0.022391	0.0189708	0.0214215	0.0201381	0.0262393	0.0314471	0.0305864	0.0283731	0.0248966	0.0214154	0.0243609	0.0278606
Calcarisporiellales	0	0	0	0	0	0	0	0	0	0	0	0	0	0	0	0	0	0	0	0	0	3.09433e-07	0	0
Caldilineales	0.000136028	0.000131626	0.000144069	0.000152999	0.000118999	0.000127869	0.00011799	0.000128737	0.000168824	0.000178867	0.000207498	0.000188613	0.000182202	0.000157532	0.000177946	0.000154942	0.000162602	0.000163187	0.000159871	0.000167795	0.000168899	0.000142981	0.000146015	0.000168469
Caldisericales	4.26116e-06	1.23412e-05	3.78382e-06	6.74733e-06	4.52546e-06	4.02208e-06	1.38875e-06	2.02843e-06	4.79137e-06	6.2128e-06	4.90366e-06	5.74315e-06	1.08211e-05	6.43969e-06	5.98435e-06	8.2771e-06	6.61708e-06	4.22977e-06	5.04177e-06	5.7811e-06	3.2364e-06	3.82048e-06	3.15268e-06	3.16666e-06
Calditrichales	0.000148461	0.000124485	0.000157759	0.000141915	0.000133407	0.000135187	0.000135259	0.000110428	0.000135851	0.000139667	0.000160139	0.000144854	0.00014404	0.000113508	0.000152375	0.00013067	0.000160966	0.000155282	0.000157264	0.00012609	0.000161486	0.000124064	0.000141619	0.000153251
Campylobacterales	3.8786e-05	4.3296e-05	4.45337e-05	4.42476e-05	3.7932e-05	4.15482e-05	3.92273e-05	3.6875e-05	4.95002e-05	3.9171e-05	3.77042e-05	4.559e-05	4.22181e-05	3.47409e-05	4.13981e-05	4.0714e-05	4.78341e-05	5.73535e-05	4.53194e-05	4.52903e-05	4.43907e-05	4.34022e-05	3.65356e-05	4.21463e-05
Candidatus_Acidulodesulfobacterales	2.92533e-06	1.94606e-06	2.48005e-06	2.16384e-06	1.30351e-06	1.38005e-06	1.9996e-06	7.11438e-07	1.00749e-06	1.80777e-06	1.25095e-06	1.66767e-06	1.7227e-06	2.8802e-06	8.15996e-07	1.06237e-06	1.21859e-06	1.21883e-06	8.21895e-07	7.54553e-07	1.39056e-06	1.75015e-06	5.27781e-08	1.30071e-06
Candidatus_Actinomarinales	1.0163e-07	3.15521e-07	1.73401e-07	0	0	2.69231e-07	0	8.72403e-08	0	0	0	5.39296e-07	4.54994e-07	6.64199e-07	0	8.4835e-08	0	0	0	0	0	3.53015e-07	0	0
Candidatus_Altiarchaeales	9.44505e-06	9.24406e-06	1.01048e-05	8.39364e-06	1.06128e-05	6.73446e-06	8.17372e-06	7.71138e-06	8.66207e-06	1.13233e-05	9.93163e-06	1.18344e-05	8.58252e-06	9.70227e-06	1.0644e-05	9.10635e-06	7.04454e-06	8.57253e-06	6.96334e-06	9.05818e-06	1.13036e-05	1.10183e-05	1.07571e-05	1.06589e-05
Candidatus_Babeliales	1.03658e-06	4.10308e-07	2.20906e-07	1.36534e-06	4.87763e-07	1.64212e-07	8.07257e-07	8.57281e-07	0	3.35677e-07	1.55083e-06	5.85223e-07	1.40003e-06	5.08066e-07	0	6.06063e-07	2.82302e-07	0	0	4.48321e-07	0	3.63247e-07	1.23652e-07	0
Candidatus_Brocadiales	0.000216816	0.000209905	0.000202033	0.000223157	0.00019707	0.000198449	0.000201466	0.000188533	0.000185035	0.00018966	0.000202462	0.000205792	0.000202095	0.000176465	0.000201892	0.000194323	0.000179375	0.00016007	0.000189633	0.00015902	0.0002096	0.000175602	0.0001693	0.000181432
Candidatus_Caenarcaniphilales	2.26694e-07	7.35927e-07	2.1439e-07	9.70857e-07	5.96966e-08	0	1.43164e-06	6.66097e-07	2.76981e-07	5.68606e-07	5.869e-07	8.42815e-07	4.40039e-07	2.07485e-07	1.05684e-07	3.49765e-07	2.54072e-07	9.8118e-08	1.69698e-07	0	6.05057e-07	1.85551e-07	8.6738e-07	6.0763e-08
Candidatus_Cryosericales	5.93673e-06	6.19354e-06	3.47931e-06	4.44078e-06	5.57679e-06	5.44693e-06	5.23499e-06	4.70728e-06	5.73509e-06	5.37802e-06	6.67393e-06	5.90105e-06	6.26914e-06	5.77869e-06	5.88556e-06	3.99905e-06	2.75201e-06	3.37915e-06	3.43118e-06	3.435e-06	5.55756e-06	3.69644e-06	4.23826e-06	4.56231e-06
Candidatus_Eremiobacterales	1.03151e-05	1.38774e-05	1.19365e-05	1.3632e-05	1.42278e-05	1.65113e-05	1.46081e-05	1.31263e-05	7.5678e-06	9.79964e-06	1.11997e-05	9.82472e-06	1.27126e-05	8.04783e-06	1.39947e-05	1.0152e-05	9.36647e-06	5.86236e-06	6.51533e-06	5.94086e-06	8.3874e-06	6.26183e-06	8.00713e-06	1.01143e-05
Candidatus_Fermentibacterales	8.50793e-07	6.75292e-07	2.52864e-06	1.25519e-06	4.49726e-07	5.63879e-07	3.52022e-07	6.97304e-07	1.16359e-06	3.27172e-06	6.5566e-07	1.58868e-06	1.06753e-06	1.11749e-06	1.11691e-06	9.532e-07	2.53097e-06	5.34749e-07	2.42539e-06	1.01058e-06	2.54588e-07	1.81622e-06	7.60533e-07	9.58638e-07
Candidatus_Gastranaerophilales	3.26985e-06	4.26873e-06	3.59596e-06	2.41019e-06	2.83866e-06	2.52923e-06	2.67924e-06	3.0801e-06	2.31548e-06	2.02181e-06	2.95883e-06	3.20947e-06	3.26065e-06	4.15201e-06	2.4941e-06	2.55434e-06	2.11055e-06	4.4667e-06	3.28092e-06	2.26975e-06	1.89401e-06	2.83185e-06	3.31928e-06	2.27253e-06
Candidatus_Mcinerneyibacteriales	0	0	2.69502e-07	0	3.88881e-07	0	0	0	2.43724e-07	4.19019e-07	2.21665e-07	8.40455e-08	7.53128e-08	0	7.04562e-08	7.15276e-08	0	0	0	0	0	0	0	0
Candidatus_Methanoliparales	4.53289e-07	2.27087e-06	9.26199e-07	1.20252e-06	4.49521e-07	1.39719e-06	1.80535e-06	9.57149e-07	7.82229e-07	9.28464e-07	4.33967e-07	9.47784e-07	8.91937e-07	1.313e-06	4.031e-07	4.08903e-07	0	7.97407e-07	8.82386e-08	5.52602e-07	7.95029e-08	5.55306e-07	0	3.67827e-07
Candidatus_Methanomethyliales	1.06503e-06	1.12945e-06	7.8914e-07	1.82059e-06	7.33636e-07	1.30653e-06	8.76281e-07	5.67881e-07	7.34471e-07	9.91656e-07	1.61984e-06	1.6655e-06	9.74983e-07	4.10867e-07	8.19002e-07	2.42816e-06	2.47194e-06	1.02785e-06	1.50831e-06	2.05573e-06	1.1234e-06	1.55403e-06	1.52054e-06	9.75801e-07
Candidatus_Nanopelagicales	3.11345e-06	1.99031e-06	7.13263e-06	2.74576e-06	5.51053e-06	4.43699e-06	3.29476e-06	3.75834e-06	1.3702e-06	2.32718e-06	2.14058e-06	1.70516e-06	1.381e-06	1.47552e-06	1.68066e-06	4.05354e-06	4.93307e-06	4.95034e-06	3.68672e-06	2.87811e-06	1.57338e-06	1.4079e-06	8.00946e-07	1.43784e-06
Candidatus_Nitrosocaldales	8.34547e-06	7.39746e-06	6.02008e-06	7.43864e-06	6.26247e-06	9.16515e-06	8.67581e-06	6.70251e-06	9.21493e-06	9.38694e-06	1.22675e-05	1.25664e-05	8.26984e-06	8.28311e-06	7.89489e-06	1.09909e-05	8.74063e-06	8.71458e-06	9.09814e-06	8.87101e-06	1.15917e-05	8.56968e-06	9.52568e-06	1.04822e-05
Candidatus_Peribacterales	3.84392e-06	5.45215e-06	2.30518e-06	6.38915e-06	4.17307e-06	4.06113e-06	3.03966e-06	3.85227e-06	2.23478e-06	3.189e-06	3.24948e-06	4.68543e-06	3.23807e-06	3.12414e-06	3.40878e-06	4.23446e-06	3.86687e-07	1.22398e-06	2.9369e-06	1.07158e-06	3.83087e-06	1.53295e-06	1.17913e-06	3.05364e-06
Candidatus_Poseidoniales	6.86933e-06	9.71072e-06	8.26464e-06	7.71904e-06	6.14722e-06	6.51659e-06	5.63595e-06	5.8949e-06	4.4235e-06	5.51158e-06	1.18788e-05	5.04233e-06	8.1432e-06	6.14481e-06	7.6308e-06	9.99513e-06	7.35339e-06	7.06506e-06	3.84623e-06	4.26111e-06	7.04967e-06	5.33072e-06	4.68955e-06	9.35334e-06
Candidatus_Sumerlaeales	2.68176e-06	2.87341e-06	3.41442e-06	2.65648e-06	1.66947e-06	3.60492e-06	4.43028e-06	3.83901e-06	2.84152e-06	3.33225e-06	4.03913e-06	4.10434e-06	4.6784e-06	2.7431e-06	2.9864e-06	4.38466e-06	2.2596e-06	3.11229e-06	4.68719e-06	2.47425e-06	3.06331e-06	1.97621e-06	2.49701e-06	2.4353e-06
Candidatus_Termititenacales	5.74943e-07	1.28173e-06	3.46678e-07	5.27959e-07	1.7858e-06	8.03926e-07	6.61069e-07	2.96478e-07	3.68207e-07	1.69299e-06	9.59715e-07	3.95422e-07	2.04036e-07	1.24686e-06	5.8725e-07	2.80857e-07	1.67921e-07	4.44297e-07	1.56027e-06	1.43299e-07	4.10457e-08	1.38912e-07	0	5.94793e-07
Cantharellales	5.63827e-06	1.08412e-05	6.81253e-06	8.7066e-06	4.88169e-06	4.18052e-06	5.5082e-06	6.85968e-06	7.63422e-06	1.06873e-05	6.33646e-06	6.82595e-06	4.56174e-06	1.45185e-05	3.71721e-06	5.49096e-06	5.65682e-06	9.82175e-06	8.48134e-06	1.05392e-05	7.36076e-06	2.04955e-05	1.23044e-05	5.61124e-06
Capnodiales	1.09252e-07	7.79291e-07	2.86681e-07	3.04002e-07	4.06224e-07	3.14227e-07	5.15648e-07	3.4523e-07	2.17331e-07	2.20939e-07	7.91287e-07	2.76788e-07	2.55149e-07	2.71362e-07	9.64635e-08	6.91058e-07	6.08714e-08	2.47991e-07	1.68575e-07	3.76475e-07	1.32133e-06	1.18603e-06	9.81705e-07	9.5899e-07
Capsulimonadales	0.000107007	0.000152205	0.000119305	0.000135669	0.000174751	0.000186206	0.000188901	0.000160858	0.000114282	0.000117156	0.00011438	0.000110012	0.00011369	0.00011508	0.000130524	0.000127266	7.76433e-05	6.66462e-05	5.97095e-05	6.3764e-05	0.000103012	7.73178e-05	9.46831e-05	0.000104899
Cardiobacteriales	5.00363e-06	4.59698e-06	5.10625e-06	5.10975e-06	2.80243e-06	2.58017e-06	4.78564e-06	4.18709e-06	5.16137e-06	4.74479e-06	5.17387e-06	2.53352e-06	4.83094e-06	3.38393e-06	5.59651e-06	5.33965e-06	6.32861e-06	4.01317e-06	3.56422e-06	4.09201e-06	3.33176e-06	3.36172e-06	2.46584e-06	4.03838e-06
Catenulisporales	0.000101898	0.000139382	0.000170312	0.00026877	0.000209043	0.000218097	0.000201791	0.000288278	9.53904e-05	0.000113327	0.000117956	8.78174e-05	0.000108151	0.000133961	9.84224e-05	0.000166111	0.000347168	0.000448934	0.000517416	0.000604936	0.000136102	0.000235658	0.000246529	0.000178752
Caudovirales	0.000302685	0.000430315	0.000392173	0.000242681	0.000337642	0.000329781	0.00033679	0.000578038	0.000329964	0.000355458	0.000263061	0.000248648	0.000384058	0.000315104	0.000411304	0.000413232	0.000180265	0.000218301	0.000165784	0.000224177	0.00038544	0.000269723	0.000231399	0.000397409
Caulobacterales	0.00365702	0.00442334	0.00472625	0.00466339	0.00552541	0.00504743	0.00553097	0.0055835	0.00284558	0.00255938	0.00259452	0.00262458	0.00286796	0.00302972	0.00271666	0.00354565	0.00276728	0.00256988	0.00229821	0.00231684	0.00337302	0.00282165	0.00392866	0.00384567
Caulochytriales	5.36207e-08	0	5.60381e-07	0	1.81478e-07	8.48127e-08	0	7.83095e-07	6.8301e-07	6.04511e-07	8.97214e-08	9.23983e-07	5.73929e-07	1.58951e-06	6.93685e-07	5.21129e-07	1.13358e-06	4.19988e-07	2.03982e-06	2.2572e-06	8.26001e-07	4.14221e-06	1.544e-06	1.02984e-06
Cellvibrionales	0.000362371	0.000355815	0.000403339	0.00039898	0.000340516	0.000328997	0.000397276	0.000351392	0.000519596	0.000377811	0.000401478	0.000371053	0.00036906	0.000333619	0.000361077	0.000369418	0.000389563	0.00043479	0.000372887	0.00036285	0.000355091	0.000256167	0.000321995	0.000346524
Cenarchaeales	1.04874e-06	1.38224e-06	2.21598e-06	2.02127e-06	9.54629e-07	1.3446e-06	1.17951e-06	1.44669e-06	1.28134e-06	1.8983e-06	4.83481e-07	2.19335e-06	1.72788e-06	1.77239e-06	8.52659e-07	1.00836e-06	1.67711e-07	2.78962e-07	1.03715e-06	1.1515e-06	9.96165e-07	6.35723e-07	3.97376e-07	3.51745e-07
Ceraceosorales	2.30005e-07	6.22739e-07	9.20799e-07	2.4079e-07	6.04718e-07	1.13174e-06	3.60834e-07	7.27017e-07	7.07972e-07	9.00442e-07	2.41366e-07	1.86523e-06	9.63089e-07	4.21579e-06	6.4283e-07	1.22897e-06	2.1479e-06	1.69015e-06	1.85969e-06	3.47112e-06	2.75455e-07	5.45881e-06	2.40792e-06	9.26957e-07
Chaetothyriales	3.51999e-06	4.57953e-06	4.36041e-06	2.29893e-06	3.08741e-06	3.67133e-06	4.52719e-06	6.66866e-06	2.70175e-06	5.84228e-06	3.85977e-06	4.54352e-06	2.55261e-06	9.02102e-06	1.42261e-06	3.98872e-06	3.94696e-06	6.27413e-06	5.30694e-06	7.19419e-06	2.9306e-06	1.08064e-05	7.15933e-06	3.95714e-06
Chitinispirillales	3.10642e-06	3.56181e-06	1.57983e-06	2.8633e-06	4.39314e-06	3.84487e-06	2.42684e-06	2.80122e-06	2.40993e-06	2.58888e-06	2.06784e-06	2.93135e-06	3.13949e-06	2.97411e-06	2.40799e-06	3.16244e-06	1.36577e-06	8.43225e-07	2.07631e-06	1.67815e-06	9.91573e-07	9.08547e-07	2.39761e-06	1.18108e-06
Chitinivibrionales	0	1.82382e-07	4.4463e-07	3.30981e-07	0	0	4.8308e-07	2.1684e-07	0	2.54144e-07	3.05538e-07	6.59871e-07	6.73042e-07	1.05701e-06	0	3.83714e-07	3.62411e-07	0	3.98163e-07	1.53836e-07	5.10105e-08	9.6586e-08	6.60283e-07	0
Chitinophagales	0.0134852	0.0124779	0.0183967	0.0145008	0.0142197	0.0162799	0.0132558	0.0126711	0.0160871	0.0160569	0.0160255	0.0154547	0.017365	0.0160765	0.0184128	0.0166747	0.0175249	0.0161726	0.0154371	0.015609	0.0207492	0.0131542	0.0140022	0.0179059
Chitovirales	0	3.52929e-06	0	0	0	0	0	0	0	0	0	0	0	0	0	0	0	3.22388e-07	0	5.97762e-07	0	1.19353e-07	0	0
Chlamydiales	1.17978e-05	1.38341e-05	7.48759e-06	7.20878e-06	1.15728e-05	1.40093e-05	1.0705e-05	1.23496e-05	1.11574e-05	9.91921e-06	8.09586e-06	9.30805e-06	1.59596e-05	2.00135e-05	1.18659e-05	1.78848e-05	1.12456e-05	1.31464e-05	5.72095e-06	7.1221e-06	1.27147e-05	1.02928e-05	9.54313e-06	1.26997e-05
Chlorobiales	0.000125164	0.000121246	0.000133098	0.000130338	0.00012896	0.00012843	0.000138187	0.000124215	0.000121715	0.000126186	0.000136722	0.000121682	0.000117401	0.000105379	0.000126104	0.000122002	0.000119687	9.9699e-05	0.000125212	0.000100607	0.00012624	0.000102517	0.000106983	0.00012154
Chloroflexales	0.00112475	0.00121824	0.00128318	0.00124637	0.00119024	0.00118823	0.00124314	0.00114548	0.00145445	0.00139103	0.00162981	0.00151429	0.00159431	0.0014336	0.00149211	0.00135922	0.00127875	0.00139524	0.00128915	0.00110985	0.00147972	0.00116931	0.00144103	0.0014588
Chromatiales	0.00113021	0.0010681	0.00115749	0.00116452	0.000990709	0.000965406	0.00113977	0.00107139	0.00118369	0.00114451	0.00124945	0.0011788	0.00112697	0.00100584	0.00114995	0.00117459	0.0011403	0.00106271	0.00101493	0.0010089	0.00100682	0.000845774	0.000922527	0.00106242
Chroococcales	0.000225545	0.000211137	0.000226447	0.000234154	0.000227675	0.000227473	0.000215305	0.000203011	0.000201642	0.000205945	0.000239131	0.000225468	0.000209956	0.000203653	0.000213245	0.000210804	0.000207487	0.000193129	0.000179405	0.000189732	0.000226017	0.00018586	0.00019668	0.000230672
Chroococcidiopsidales	5.41058e-05	5.14079e-05	5.61704e-05	6.19569e-05	6.09043e-05	5.81349e-05	6.0392e-05	5.3885e-05	5.99849e-05	5.37176e-05	6.33981e-05	6.38917e-05	5.73287e-05	5.03133e-05	6.90957e-05	5.36488e-05	5.37293e-05	4.79956e-05	5.25234e-05	5.67434e-05	6.3437e-05	5.35187e-05	5.8748e-05	6.87184e-05
Chrysiogenales	8.6306e-06	8.56271e-06	7.78581e-06	9.45098e-06	7.96893e-06	9.73997e-06	7.72496e-06	5.90129e-06	9.02567e-06	5.56278e-06	1.06078e-05	1.01613e-05	8.47358e-06	9.4095e-06	1.22498e-05	7.87516e-06	7.63781e-06	1.16869e-05	6.71178e-06	8.51214e-06	6.13493e-06	7.37513e-06	7.39096e-06	1.01126e-05
Chthoniobacterales	0.00448436	0.00403265	0.00420593	0.00367132	0.00495318	0.00469505	0.00523112	0.00479584	0.00304285	0.00321259	0.0030976	0.00319607	0.00369424	0.00347359	0.00360519	0.00326155	0.00209451	0.00192768	0.00170426	0.00197747	0.00348174	0.00274302	0.00333201	0.00352147
Chthonomonadales	0.000236108	0.000361321	0.000303807	0.000414174	0.000563912	0.000615674	0.00057392	0.000535479	0.00029261	0.000332878	0.000330928	0.000331909	0.000264357	0.000238578	0.000341181	0.000304115	0.000224016	0.000178813	0.000170847	0.00017965	0.000273537	0.000189659	0.000206483	0.000255306
Chytridiales	1.24686e-06	1.848e-06	2.52176e-06	9.02794e-07	3.40881e-06	1.73233e-06	1.63086e-06	2.23401e-06	3.05185e-06	4.78364e-06	3.60948e-06	5.13934e-06	3.62195e-06	1.13652e-05	2.30801e-06	2.66925e-06	4.63196e-06	7.95487e-06	4.83613e-06	9.11309e-06	1.4987e-06	1.35557e-05	9.05874e-06	4.40536e-06
Cladosporiales	0	1.01129e-07	2.53533e-07	6.38337e-07	6.65631e-07	3.72805e-07	3.11325e-07	6.05004e-07	3.83786e-07	1.06846e-06	1.908e-07	6.05061e-07	4.4431e-07	8.20133e-07	4.60602e-07	2.06973e-07	0	0	6.39713e-07	6.6153e-07	3.12999e-07	8.81831e-07	1.01213e-06	1.37101e-06
Clostridiales	0.000579243	0.000654566	0.000618131	0.000686898	0.000634722	0.000648081	0.0006133	0.000597787	0.000619631	0.000648193	0.000649554	0.000627443	0.000692288	0.000648565	0.00069234	0.000668632	0.000570739	0.000568875	0.000595822	0.00052424	0.000617404	0.000570181	0.000571437	0.000577108
Coniochaetales	8.07048e-07	1.56874e-06	3.28952e-07	1.06311e-06	9.28438e-07	1.18749e-06	3.52036e-06	1.68522e-06	3.44737e-07	1.43296e-06	3.74278e-06	1.50155e-06	8.54171e-07	7.66284e-07	4.58964e-07	2.37433e-06	6.56529e-07	1.14279e-06	1.20198e-06	4.71358e-07	1.19034e-06	3.22252e-07	7.07491e-07	1.55813e-06
Coprothermobacterales	3.00614e-06	2.53828e-06	3.29544e-06	1.04177e-06	2.45677e-06	1.56773e-06	2.67139e-06	1.97042e-06	1.56317e-06	2.56034e-06	3.02697e-06	2.57189e-06	2.27945e-06	2.0318e-06	2.25262e-06	3.42235e-06	8.66247e-07	1.2891e-06	1.89335e-06	7.71971e-07	1.71792e-06	1.63926e-06	1.69131e-06	1.74933e-06
Coriobacteriales	2.53513e-05	2.69603e-05	2.47506e-05	3.22926e-05	2.55676e-05	2.58807e-05	2.44245e-05	2.50989e-05	2.26973e-05	2.98268e-05	2.8659e-05	2.70701e-05	2.57626e-05	2.37716e-05	2.40157e-05	2.33671e-05	2.66957e-05	2.88191e-05	3.65637e-05	3.00944e-05	2.53686e-05	2.3327e-05	2.47362e-05	2.72938e-05
Corticiales	1.07903e-07	0	2.76157e-07	4.29782e-07	8.57561e-07	8.97437e-08	0	2.84911e-07	0	2.1717e-07	9.30444e-08	5.68215e-07	0	2.77372e-07	0	0	3.28295e-07	4.53265e-06	2.40309e-07	7.29944e-07	1.05862e-06	2.92373e-06	5.76554e-07	5.29842e-07
Corynebacteriales	0.00130113	0.00143114	0.00173402	0.00146079	0.00187149	0.00183589	0.00184554	0.00201271	0.00182568	0.00196319	0.0015694	0.00195734	0.00175838	0.00245264	0.00167083	0.00178586	0.00190455	0.00200646	0.00213878	0.00238031	0.00152641	0.00269016	0.00232987	0.001727
Cryppavirales	8.49689e-07	2.97099e-07	9.59715e-07	4.45028e-08	2.99291e-07	1.09728e-06	5.50608e-07	1.99846e-06	5.65387e-06	6.38351e-06	2.06179e-06	5.99556e-06	3.42615e-06	1.5697e-05	2.8726e-06	2.41998e-06	6.90255e-06	7.75725e-06	7.83896e-06	1.45295e-05	2.87647e-06	1.97963e-05	1.41055e-05	3.93486e-06
Cryptosporangiales	8.87222e-05	0.000104771	0.00011769	9.76924e-05	0.000152502	0.00015767	0.000170401	0.000164235	9.05031e-05	9.55099e-05	0.000113735	8.22726e-05	9.50954e-05	9.15178e-05	9.06899e-05	9.62371e-05	8.82343e-05	0.000104059	8.57574e-05	7.63051e-05	8.2463e-05	5.78825e-05	8.30381e-05	6.88592e-05
Cystofilobasidiales	0	2.95801e-07	0	0	0	0	0	0	0	8.95833e-08	0	2.68299e-07	8.9796e-08	9.8911e-08	1.65208e-07	3.74144e-07	0	2.74357e-07	6.49112e-07	2.68226e-07	1.02614e-07	9.70359e-07	4.12175e-07	0
Cytophagales	0.00226486	0.00283713	0.00322237	0.00260387	0.00251512	0.00250479	0.00371271	0.00240819	0.00290649	0.00386473	0.00280857	0.00298559	0.00288765	0.00296453	0.00288897	0.00283404	0.00295887	0.00291099	0.00334028	0.00307647	0.00315312	0.00272728	0.00258714	0.00258997
Dacrymycetales	4.29275e-07	1.01694e-06	1.98962e-06	1.27818e-06	2.17612e-06	1.39463e-06	3.69389e-07	1.77547e-06	4.09129e-06	5.95841e-06	3.14033e-06	5.31209e-06	4.07591e-06	1.19018e-05	3.09725e-06	2.70983e-06	5.65132e-06	6.68441e-06	6.37933e-06	1.20513e-05	3.61683e-06	2.03092e-05	1.21453e-05	5.2053e-06
Deferribacterales	8.02705e-06	9.58779e-06	9.45579e-06	8.01794e-06	5.07315e-06	8.13945e-06	6.77886e-06	7.66633e-06	8.28387e-06	7.75511e-06	7.79211e-06	9.15496e-06	8.09267e-06	5.97145e-06	1.00903e-05	9.72391e-06	6.55327e-06	1.02118e-05	6.75699e-06	7.0004e-06	7.25311e-06	5.21338e-06	6.1559e-06	1.01816e-05
Dehalococcoidales	1.53627e-05	1.22215e-05	1.64102e-05	1.26307e-05	1.10506e-05	1.60391e-05	9.91315e-06	1.39959e-05	1.55989e-05	1.49258e-05	1.92996e-05	1.65131e-05	1.49386e-05	1.38436e-05	1.8735e-05	1.49539e-05	1.37947e-05	1.44376e-05	1.54236e-05	1.08396e-05	1.33624e-05	9.68313e-06	1.41204e-05	1.51655e-05
Deinococcales	0.000242107	0.000254202	0.000249925	0.000252863	0.000261399	0.000249227	0.000258543	0.000224658	0.000254847	0.00025056	0.000270605	0.000252648	0.000254821	0.000245963	0.00028502	0.000264967	0.000221821	0.000226768	0.000215858	0.000199934	0.000234153	0.000191342	0.000236959	0.00024761
Desulfarculales	1.08737e-05	1.13295e-05	1.28331e-05	1.41152e-05	1.72917e-05	1.62638e-05	1.5078e-05	1.18955e-05	1.23515e-05	1.16897e-05	1.79602e-05	1.26188e-05	1.27776e-05	1.11662e-05	1.48019e-05	1.36079e-05	1.80898e-05	2.00486e-05	2.13327e-05	1.6767e-05	1.5991e-05	1.02273e-05	1.20944e-05	1.42779e-05
Desulfobacterales	0.000673391	0.000687933	0.000692634	0.000768211	0.000641041	0.000648836	0.000652621	0.000636519	0.000675855	0.000678163	0.000752481	0.000672659	0.000699873	0.000588238	0.000699639	0.000700249	0.000664011	0.000640338	0.000708488	0.000611504	0.000660947	0.000532223	0.000609947	0.000643401
Desulfovibrionales	0.00019254	0.000207513	0.000219866	0.000214809	0.000218644	0.000212478	0.000216588	0.000203611	0.000194223	0.000197091	0.000192412	0.000195627	0.000215229	0.000197133	0.000217599	0.000209616	0.000180576	0.000195036	0.000183071	0.000185946	0.00018169	0.000166025	0.000172133	0.000176959
Desulfurellales	3.99291e-05	6.89673e-05	4.14762e-05	4.51358e-05	3.66006e-05	4.22848e-05	4.11899e-05	0.000108353	3.48459e-05	3.88594e-05	3.63944e-05	2.78571e-05	4.31285e-05	4.70353e-05	4.50402e-05	5.38195e-05	1.98225e-05	2.0562e-05	2.36027e-05	2.25073e-05	2.73051e-05	1.86663e-05	2.13452e-05	2.36383e-05
Desulfurobacteriales	6.33894e-06	3.53301e-06	5.17373e-06	6.9422e-06	4.92402e-06	5.36863e-06	5.39817e-06	3.80212e-06	2.80365e-06	5.24358e-06	4.77734e-06	3.7011e-06	5.0954e-06	5.18939e-06	5.10771e-06	5.93841e-06	6.13639e-06	3.41708e-06	7.025e-06	4.45355e-06	6.48164e-06	3.87621e-06	5.56299e-06	6.34033e-06
Desulfurococcales	1.87116e-06	3.48543e-06	2.60598e-06	1.8499e-06	2.28607e-06	2.1327e-06	3.08986e-06	2.11193e-06	2.76087e-06	2.23034e-06	2.09152e-06	1.49325e-06	1.97468e-06	1.85372e-06	2.66071e-06	3.85324e-06	3.05835e-06	7.76799e-07	3.15755e-06	3.34313e-06	2.1839e-06	9.57421e-07	1.01331e-06	1.7453e-06
Desulfuromonadales	0.000613338	0.000634973	0.000622137	0.000637503	0.000633068	0.000609633	0.000626562	0.000570106	0.000592615	0.000590684	0.000633036	0.000592761	0.000644122	0.000536339	0.000659494	0.000630599	0.0005842	0.000530957	0.000543289	0.000491494	0.000565254	0.00047735	0.000500273	0.000560943
Diaporthales	4.66096e-06	5.12704e-06	8.65736e-06	4.11813e-06	1.00317e-05	7.85058e-06	6.534e-06	2.26041e-05	2.70779e-05	3.7096e-05	1.58879e-05	4.5019e-05	2.17084e-05	9.27166e-05	2.03202e-05	2.8353e-05	3.9574e-05	5.29453e-05	5.90243e-05	8.53299e-05	2.12089e-05	0.000147672	9.88323e-05	3.25384e-05
Dictyoglomales	4.29183e-06	4.79104e-06	4.64095e-06	5.26392e-06	4.31104e-06	5.32073e-06	4.98075e-06	4.6429e-06	5.60349e-06	5.89748e-06	6.24641e-06	4.68987e-06	5.53631e-06	5.15517e-06	5.01868e-06	4.99432e-06	1.51837e-06	2.52633e-06	4.52932e-06	2.14401e-06	2.57474e-06	2.34734e-06	3.02183e-06	4.15488e-06
Dimargaritales	8.91855e-08	1.94766e-07	2.33007e-07	4.12663e-07	3.40367e-07	0	2.88793e-07	1.1244e-06	1.79094e-06	1.91352e-06	1.13505e-06	1.51308e-06	9.43504e-07	3.02251e-06	9.59312e-07	6.72106e-07	1.41598e-06	2.22174e-06	3.11834e-06	2.56219e-06	1.77075e-06	6.08089e-06	3.46393e-06	2.56503e-06
Diversisporales	3.33852e-05	0.000107574	5.92598e-05	5.56063e-05	5.38375e-05	2.20154e-05	2.83411e-05	4.02013e-05	6.02562e-05	5.51231e-05	2.82385e-05	4.43417e-05	2.35364e-05	4.738e-05	1.62112e-05	4.30358e-05	4.06126e-05	2.81484e-05	6.08422e-05	5.20688e-05	1.96325e-05	0.000109307	6.18902e-05	2.37082e-05
Dothideales	1.31932e-06	7.73796e-07	9.67781e-07	1.57173e-06	9.59179e-07	1.09478e-06	1.66796e-06	1.18281e-06	1.4659e-06	2.67991e-07	3.5489e-07	1.14789e-06	1.22542e-06	1.51364e-06	8.74177e-07	1.05585e-06	6.82706e-07	8.23618e-08	1.35973e-06	4.81172e-07	0	6.38511e-07	0	7.16459e-07
Eggerthellales	3.85023e-06	5.29879e-06	3.90883e-06	5.64815e-06	3.26336e-06	7.76613e-06	8.76825e-06	2.82092e-06	7.21763e-06	4.77391e-06	5.71917e-06	6.78888e-06	5.4109e-06	8.51882e-06	6.07964e-06	5.50952e-06	6.24107e-06	6.46722e-06	4.42237e-06	3.60859e-06	6.7261e-06	3.93175e-06	4.59339e-06	3.80659e-06
Egibacterales	1.24327e-05	1.38514e-05	1.08063e-05	1.45173e-05	1.26366e-05	1.64552e-05	1.8016e-05	1.3581e-05	1.81619e-05	1.85435e-05	2.01909e-05	1.71025e-05	1.66007e-05	1.5286e-05	1.40652e-05	1.70984e-05	2.59181e-05	2.83267e-05	2.08495e-05	2.00092e-05	1.23673e-05	1.43213e-05	1.80019e-05	1.41896e-05
Egicoccales	8.72989e-06	1.19392e-05	1.02076e-05	1.27357e-05	1.21415e-05	1.54147e-05	1.761e-05	1.63438e-05	1.18251e-05	1.45866e-05	1.42259e-05	1.31269e-05	1.29822e-05	1.15107e-05	1.55399e-05	1.44677e-05	1.71514e-05	1.20018e-05	1.69044e-05	1.24751e-05	8.77804e-06	7.13554e-06	9.66125e-06	1.01691e-05
Elusimicrobiales	2.4224e-07	1.15799e-06	1.43093e-06	2.14036e-07	9.92385e-07	2.09505e-06	9.65871e-07	5.71887e-07	1.57621e-06	2.09904e-06	1.14888e-06	2.76559e-06	2.15182e-06	8.93982e-07	2.16135e-06	2.93749e-06	1.64929e-06	7.70004e-07	2.34707e-06	1.42841e-06	2.47665e-06	1.80706e-06	1.40362e-06	1.64234e-06
Emcibacterales	2.26033e-05	1.62381e-05	2.00275e-05	2.52844e-05	1.89734e-05	1.42848e-05	3.41623e-05	2.60214e-05	1.028e-05	1.25167e-05	1.85517e-05	1.32242e-05	1.27301e-05	1.48822e-05	1.54433e-05	1.80733e-05	1.58644e-05	1.42537e-05	2.09715e-05	1.64975e-05	1.49592e-05	1.00687e-05	1.41689e-05	1.69149e-05
Endogonales	8.2272e-06	8.0341e-06	1.0093e-05	5.56593e-06	8.70433e-06	8.03579e-06	6.48546e-06	8.54439e-06	8.62441e-06	1.2878e-05	7.90708e-06	1.45038e-05	1.19453e-05	1.90984e-05	7.37301e-06	9.02776e-06	9.90098e-06	1.09247e-05	1.27173e-05	1.68776e-05	4.15408e-06	3.24128e-05	2.06786e-05	7.51317e-06
Endomicrobiales	1.07903e-07	0	3.0228e-07	6.73441e-07	0	3.007e-07	7.15247e-07	3.89749e-07	5.47118e-07	1.30243e-06	8.1461e-07	1.45762e-06	3.18399e-06	2.04174e-07	2.14014e-06	1.44946e-06	2.64569e-06	2.48445e-06	2.16687e-06	1.70022e-06	1.9071e-06	1.67921e-06	1.32498e-06	1.68577e-06
Enterobacterales	0.000528827	0.000558256	0.000874936	0.00037953	0.000757552	0.000535591	0.000418659	0.00103091	0.00141984	0.00198755	0.000770267	0.00217084	0.00138991	0.00396904	0.00107476	0.00128561	0.0019731	0.00270577	0.00280846	0.00409038	0.00122515	0.00598567	0.00405505	0.0017272
Entomophthorales	3.59318e-07	9.50365e-08	5.74623e-07	1.51068e-07	9.60577e-07	7.96278e-07	9.41368e-07	1.28004e-06	1.55535e-06	1.53159e-06	7.68543e-07	3.20046e-06	7.60365e-07	4.51826e-06	5.99643e-07	1.58237e-06	2.55654e-06	2.85339e-06	2.32822e-06	3.54727e-06	2.35125e-06	9.82425e-06	4.15941e-06	2.52677e-06
Entomoplasmatales	2.64872e-06	1.76423e-06	6.53093e-06	2.37703e-06	6.16685e-06	4.41989e-06	1.10667e-06	1.60792e-05	2.30451e-05	3.54047e-05	1.41586e-05	4.10931e-05	4.23221e-05	0.00201851	1.51354e-05	2.70348e-05	3.21083e-05	4.3864e-05	5.31545e-05	8.48402e-05	2.04568e-05	0.000126803	8.47055e-05	3.29042e-05
Entylomatales	0	0	0	0	7.43413e-07	9.76957e-08	2.10741e-07	2.02775e-07	9.62391e-08	1.9731e-07	3.7683e-07	2.56392e-07	0	9.16491e-07	5.42401e-07	3.7545e-07	0	0	1.0362e-07	5.46205e-07	2.66775e-07	9.98528e-07	1.50051e-06	1.20159e-06
Eremomycetales	0	0	0	1.07348e-07	5.24269e-07	2.89423e-07	5.18533e-07	1.25415e-06	1.11582e-07	3.38859e-07	0	5.35886e-07	0	9.00749e-07	2.79995e-07	0	5.37423e-07	3.13433e-07	6.27475e-07	1.04563e-06	0	4.42417e-07	8.55156e-07	2.59474e-07
Erysipelotrichales	1.23838e-05	9.91666e-06	1.32025e-05	1.01884e-05	1.14889e-05	1.20348e-05	9.95704e-06	1.74454e-05	1.50372e-05	2.33029e-05	1.70624e-05	2.27408e-05	1.61474e-05	5.19983e-05	1.56747e-05	1.79941e-05	1.92753e-05	3.07855e-05	3.71109e-05	4.31352e-05	2.18894e-05	6.015e-05	4.27682e-05	2.36396e-05
Erysiphales	3.01791e-06	3.4272e-06	5.00288e-06	2.28027e-06	4.5381e-06	4.36829e-06	3.64166e-06	4.68269e-06	1.41878e-05	1.25742e-05	4.11634e-06	1.32164e-05	9.30088e-06	2.15403e-05	5.08312e-06	6.10599e-06	9.1914e-06	1.82559e-05	1.44178e-05	2.35881e-05	2.7607e-05	3.42757e-05	2.17145e-05	7.67853e-06
Eurotiales	2.11115e-05	2.49586e-05	3.52367e-05	1.5688e-05	4.72567e-05	2.39312e-05	2.463e-05	4.43328e-05	5.76479e-05	7.88317e-05	3.40219e-05	8.54981e-05	4.94968e-05	0.000160469	4.32241e-05	5.38781e-05	9.23445e-05	0.000124222	0.000117869	0.000179186	5.06782e-05	0.000252786	0.000187344	7.48667e-05
Euzebyales	0.000133872	0.00014055	0.000130246	0.000155425	0.000188405	0.000189323	0.000178818	0.000179734	0.000194935	0.000184713	0.000185612	0.000177029	0.000160908	0.000161357	0.000189113	0.000163833	0.000244925	0.000252864	0.000256141	0.000209657	0.000147467	0.000134968	0.000147224	0.000142433
Exobasidiales	0	4.7617e-07	3.78223e-07	3.68079e-07	2.95332e-07	2.49833e-07	2.18805e-07	7.50223e-07	1.92599e-07	7.19962e-07	1.73255e-07	4.10158e-07	3.39872e-07	4.86595e-07	2.99439e-07	0	0	9.5448e-07	3.95576e-07	4.91126e-07	0	1.59199e-06	1.10969e-07	0
Ferrovales	3.59353e-05	3.63892e-05	3.63574e-05	3.69788e-05	3.2171e-05	3.54276e-05	3.36591e-05	3.65493e-05	3.38997e-05	2.55305e-05	3.067e-05	2.43605e-05	3.42457e-05	2.5168e-05	3.09284e-05	2.87573e-05	2.91862e-05	3.2154e-05	3.12257e-05	3.21025e-05	2.63902e-05	2.30439e-05	2.81635e-05	3.48211e-05
Fervidicoccales	0	0	1.11287e-07	0	0	0	0	3.98934e-07	0	0	4.43238e-07	2.86676e-07	3.86489e-07	0	4.43613e-07	0	0	6.35694e-07	0	0	0	7.05076e-07	0	0
Fibrobacterales	3.28172e-05	3.23917e-05	3.89523e-05	3.90339e-05	4.35202e-05	4.05506e-05	4.07927e-05	3.68663e-05	2.94769e-05	3.23597e-05	2.82249e-05	2.70676e-05	3.86329e-05	3.1293e-05	4.32964e-05	4.32988e-05	2.1424e-05	2.4922e-05	2.04342e-05	2.1563e-05	1.69729e-05	1.35893e-05	2.35781e-05	2.20765e-05
Fimbriimonadales	0.000150883	0.00022074	0.00015961	0.000243571	0.000247156	0.000309221	0.000240375	0.000240173	0.000166991	0.000179182	0.000177429	0.000181889	0.000181301	0.000141456	0.000234286	0.00018497	7.92891e-05	5.86077e-05	7.56581e-05	6.39013e-05	0.000135858	0.000132762	0.000155098	0.000174688
Flavobacteriales	0.00106902	0.00108379	0.00134484	0.00123061	0.00101307	0.00110497	0.0044038	0.000920667	0.00128186	0.00137876	0.00128946	0.00130067	0.00130961	0.00111742	0.00136112	0.00127541	0.00140542	0.0014114	0.00146459	0.00129258	0.00202355	0.00106569	0.00106405	0.00125599
Frankiales	0.000901046	0.000970786	0.0056669	0.00105039	0.0016147	0.00166244	0.00177434	0.00173949	0.000829487	0.000934138	0.000790511	0.000804612	0.000838279	0.00109582	0.000849584	0.000923759	0.000940916	0.000953608	0.000858836	0.000846632	0.00068004	0.000835294	0.000870312	0.000738404
Fusobacteriales	6.69632e-06	6.42926e-06	5.38017e-06	8.7136e-06	5.85323e-06	5.85484e-06	5.80925e-06	4.60457e-06	6.28861e-06	8.14654e-06	6.2785e-06	8.60479e-06	4.73411e-06	5.57765e-06	7.31616e-06	6.287e-06	7.67496e-06	5.31089e-06	5.68232e-06	7.17987e-06	6.75875e-06	6.83637e-06	6.68417e-06	6.03233e-06
Gaiellales	0.000359028	0.000413768	0.000390254	0.000376307	0.000415745	0.000418193	0.000419257	0.000451208	0.000453181	0.000450932	0.000436379	0.000421809	0.000484573	0.000419097	0.000451376	0.000444629	0.000291359	0.000232359	0.000862293	0.000246833	0.000341823	0.000295516	0.000399259	0.000371224
Geastrales	1.10635e-07	9.56125e-08	3.70676e-07	4.96804e-07	5.04457e-07	2.08593e-07	7.05455e-07	1.63461e-06	2.01052e-06	1.29961e-06	1.45469e-06	2.80849e-06	1.23454e-06	6.63966e-06	1.6805e-06	1.60438e-06	2.08882e-06	3.84906e-06	3.57214e-06	5.75807e-06	1.05504e-06	8.31371e-06	5.4438e-06	1.09725e-06
Gemmatales	0.000856848	0.00101267	0.00110908	0.00110059	0.00124964	0.00116212	0.00117336	0.00110483	0.000905834	0.000889912	0.000991531	0.000922415	0.00097594	0.000882208	0.000985414	0.00101318	0.000846377	0.000770984	0.000814983	0.000729978	0.000838291	0.000684313	0.00073735	0.000857799
Gemmatimonadales	0.0466496	0.044787	0.0426081	0.0405867	0.0414444	0.0435026	0.0393532	0.0366465	0.033626	0.0364694	0.0377087	0.0350905	0.0404677	0.0378844	0.0444003	0.0405938	0.0311011	0.0290142	0.0266051	0.0294636	0.0461075	0.0358835	0.0414246	0.0436766
Geodermatophilales	0.000525205	0.000615184	0.000764011	0.000618842	0.000881478	0.000934057	0.00094848	0.000918012	0.000614232	0.000646975	0.000623938	0.000608672	0.000603364	0.000597718	0.000657	0.000632642	0.000640665	0.000604208	0.000612448	0.000589497	0.000569487	0.000470517	0.000550187	0.000552529
Georgefischeriales	0	0	0	0	0	0	0	0	0	1.76081e-07	6.97833e-08	9.30103e-08	9.33879e-08	6.17221e-07	0	0	3.33665e-07	1.00052e-06	3.76485e-07	9.68595e-08	0	1.73739e-06	3.46225e-07	0
Geplafuvirales	0	0	0	0	7.01589e-08	9.52834e-08	0	0	9.34741e-07	3.11846e-07	0	2.12897e-07	2.13762e-07	8.53965e-07	1.40799e-07	0	1.00406e-07	1.16325e-07	3.44704e-07	5.39218e-07	2.36242e-07	1.64898e-06	1.7389e-05	2.68943e-06
Gloeobacterales	8.97981e-05	9.77719e-05	9.77749e-05	9.74969e-05	9.74533e-05	0.000104011	0.000104098	9.83541e-05	7.47459e-05	8.518e-05	8.98653e-05	8.79852e-05	8.7985e-05	8.06271e-05	0.000100955	8.82252e-05	8.20315e-05	7.18901e-05	7.10642e-05	6.93244e-05	9.14876e-05	6.45192e-05	8.10316e-05	9.31289e-05
Gloeoemargaritales	2.4038e-06	2.66367e-06	2.413e-06	2.30766e-06	3.37308e-06	2.37167e-06	2.4252e-06	3.5e-06	1.78343e-06	1.0057e-06	3.25774e-06	2.5107e-06	2.63883e-06	1.40878e-06	3.32278e-06	3.25207e-06	1.34221e-06	1.95001e-06	8.44703e-07	1.37752e-06	1.88582e-06	1.71534e-06	1.34708e-06	1.20365e-06
Gloeophyllales	1.09252e-07	5.18707e-07	1.97525e-07	1.36793e-06	1.02856e-06	5.78932e-07	9.74676e-08	3.62657e-07	3.2263e-07	1.00085e-06	3.34199e-07	3.68803e-07	1.59333e-06	1.76559e-06	3.93783e-07	6.94839e-08	1.32851e-06	2.46117e-06	4.64217e-07	1.96971e-06	9.87806e-07	5.35873e-06	6.42664e-07	1.31421e-06
Glomerales	0.000163976	0.000296506	0.000258528	0.000222856	0.000243805	8.33419e-05	7.4008e-05	0.000198103	0.00093197	0.0014941	0.000307652	0.000540835	0.000265872	0.00078891	0.00020243	0.000294701	0.000367951	0.000518101	0.000520522	0.000677423	0.000177696	0.000952186	0.000685237	0.000294905
Glomerellales	5.33135e-06	4.40065e-06	6.97319e-06	5.2828e-06	5.45988e-06	5.7774e-06	9.70335e-06	8.07777e-06	9.03393e-06	1.15826e-05	2.15446e-05	1.02585e-05	1.17855e-05	1.71956e-05	6.70421e-06	9.34866e-06	7.34711e-06	1.40611e-05	1.22364e-05	1.72507e-05	6.9219e-06	2.3208e-05	1.85927e-05	7.50817e-06
Glycomycetales	3.93173e-05	4.11163e-05	3.76721e-05	3.69023e-05	4.80779e-05	4.18594e-05	5.31587e-05	5.74828e-05	0.000123555	9.74432e-05	9.5725e-05	9.79625e-05	4.96347e-05	5.26211e-05	4.69398e-05	5.68552e-05	4.20116e-05	4.11006e-05	3.78165e-05	3.88816e-05	3.57033e-05	2.88064e-05	3.62379e-05	3.53504e-05
Gomphales	0	0	0	0	4.75903e-08	0	0	0	0	0	9.09135e-07	0	0	0	0	0	0	0	0	0	0	0	0	0
Halanaerobiales	1.10649e-05	1.29091e-05	1.34498e-05	1.49729e-05	1.10006e-05	1.25423e-05	1.0901e-05	1.35856e-05	1.17944e-05	1.42342e-05	1.70673e-05	1.66792e-05	1.585e-05	1.2215e-05	1.60079e-05	1.06787e-05	8.64051e-06	7.95077e-06	1.08547e-05	9.4289e-06	1.06534e-05	9.59747e-06	1.18977e-05	1.30518e-05
Halobacteriales	3.62729e-05	4.39111e-05	4.096e-05	4.46592e-05	4.17442e-05	4.93646e-05	4.24347e-05	4.32915e-05	4.18198e-05	3.87832e-05	4.48071e-05	4.49924e-05	4.28859e-05	4.02617e-05	5.09217e-05	4.40865e-05	4.31218e-05	3.48081e-05	4.60078e-05	4.71793e-05	4.53825e-05	3.6862e-05	3.89368e-05	4.35259e-05
Haloferacales	2.69488e-05	2.33421e-05	2.72844e-05	2.71801e-05	2.99566e-05	3.05379e-05	3.15079e-05	3.08938e-05	3.11145e-05	3.21903e-05	3.66897e-05	3.3231e-05	3.74006e-05	3.01925e-05	3.26067e-05	3.65205e-05	4.34984e-05	3.58574e-05	3.16733e-05	3.37903e-05	3.66034e-05	3.03671e-05	3.13476e-05	3.95382e-05
Halopanivirales	0	0	0	0	0	0	0	0	0	0	0	0	0	0	4.92228e-07	0	0	0	0	0	0	0	0	0
Haloplasmatales	1.28532e-07	0	0	1.04523e-07	0	0	1.02598e-07	9.74373e-08	0	0	0	3.07755e-07	8.64703e-08	3.55523e-07	6.17144e-07	2.14583e-07	6.53419e-07	4.7841e-07	5.72242e-07	1.10267e-06	6.73686e-07	0	3.41669e-07	2.82369e-07
Harpellales	3.55972e-06	3.54428e-06	3.59181e-06	1.62025e-06	4.77055e-06	1.735e-06	3.23842e-06	3.5338e-06	9.48712e-06	9.12642e-06	5.55509e-06	7.8939e-06	5.92808e-06	1.05805e-05	3.48779e-06	5.31459e-06	8.28047e-06	8.94479e-06	1.07132e-05	1.11565e-05	9.99987e-06	2.18761e-05	1.05892e-05	5.92955e-06
Helotiales	5.57686e-06	7.22201e-06	8.61312e-06	1.01782e-05	7.83018e-06	6.76153e-06	9.48117e-06	1.09658e-05	6.16035e-06	7.54654e-06	1.02299e-05	1.1757e-05	7.20657e-06	1.71018e-05	7.92048e-06	8.80604e-06	9.51634e-06	9.41473e-06	7.15414e-06	1.32417e-05	5.09895e-06	1.7573e-05	1.08088e-05	6.98421e-06
Herpesvirales	2.18504e-07	0	0	0	5.95473e-07	1.92949e-07	0	9.37834e-08	1.92478e-07	9.74219e-08	2.82622e-07	0	1.75102e-07	8.48979e-08	0	0	3.74593e-07	2.82089e-07	0	0	1.1031e-07	1.04434e-07	1.08195e-07	1.20007e-07
Herpetosiphonales	0.000247737	0.000283553	0.000234212	0.000280535	0.000254703	0.000268122	0.000285451	0.000243003	0.000328785	0.000319698	0.000360708	0.00032375	0.000384285	0.000348336	0.000418201	0.000319771	0.000264521	0.000263739	0.000259066	0.000240518	0.000291568	0.000249841	0.000276868	0.000276871
Holophagales	0.000122886	0.000142167	0.000135271	0.000141499	0.000129909	0.000124762	0.000134626	0.000121073	0.000129489	0.000131141	0.000133373	0.000133282	0.000130125	0.000107589	0.000148207	0.000140679	0.0001302	0.000146304	0.000141083	0.000116778	0.000129521	0.000109026	0.000116497	0.000125802
Holosporales	1.12518e-05	1.45502e-05	8.28035e-06	1.03454e-05	1.18725e-05	1.16597e-05	1.22137e-05	1.3156e-05	2.15246e-05	1.2566e-05	1.18444e-05	1.41013e-05	1.40874e-05	1.4536e-05	1.10453e-05	1.80151e-05	1.27102e-05	1.35578e-05	1.0416e-05	7.39432e-06	6.46515e-06	9.85977e-06	7.5927e-06	5.21057e-06
Hydrogenophilales	0.000233787	0.000223503	0.000245443	0.000240419	0.000205748	0.000211741	0.000204948	0.000206872	0.000217856	0.000220862	0.000234431	0.000208982	0.000217993	0.000180417	0.000210979	0.000209341	0.000257394	0.000254938	0.000250216	0.000223993	0.000203714	0.000170656	0.000197579	0.000230403
Hymenochaetales	1.45695e-06	1.72945e-06	8.16471e-07	2.86764e-06	1.76379e-06	6.42983e-07	3.77294e-07	1.3981e-06	3.07284e-06	2.56212e-06	4.17361e-06	1.94924e-06	9.58721e-07	4.22333e-06	2.19696e-06	1.94335e-06	2.50641e-06	3.13733e-06	3.95135e-06	5.72573e-06	3.15984e-06	9.82085e-06	6.02794e-06	4.05253e-06
Hypocreales	1.32993e-05	1.99625e-05	1.9002e-05	1.65837e-05	1.75257e-05	2.02748e-05	1.96128e-05	2.12572e-05	2.64975e-05	2.04385e-05	3.16507e-05	1.94948e-05	1.99162e-05	2.42148e-05	1.7294e-05	2.16483e-05	1.13485e-05	1.78224e-05	1.86834e-05	2.68002e-05	1.49171e-05	2.95058e-05	2.08354e-05	1.29499e-05
Ignavibacteriales	0.000107724	0.000110773	0.000118765	0.000118412	0.000111572	0.000119944	0.000107836	0.000100595	0.000111284	0.000114152	0.000118757	0.000125213	0.000124376	0.000101792	0.000134681	0.00011175	0.000112138	9.45362e-05	0.000112494	0.000104674	0.000127901	0.000102952	0.000104398	0.000109367
Imitervirales	7.3995e-07	2.15458e-06	1.73513e-06	2.07021e-06	2.07933e-06	1.32019e-06	1.97164e-06	2.20564e-06	1.73859e-06	2.23045e-06	2.35425e-06	1.60768e-06	1.17543e-06	3.77352e-06	2.30726e-06	2.41454e-06	2.2178e-06	3.7234e-06	3.04589e-06	2.00139e-06	4.08686e-06	5.04279e-06	2.34239e-06	2.5398e-06
Immundisolibacterales	1.24865e-05	1.14468e-05	1.28937e-05	1.13482e-05	1.05962e-05	9.43259e-06	1.37541e-05	8.83195e-06	1.05243e-05	9.64329e-06	1.10208e-05	1.0011e-05	1.11767e-05	1.20355e-05	1.16661e-05	9.35577e-06	1.11634e-05	1.04526e-05	8.65974e-06	8.59715e-06	8.68153e-06	9.38392e-06	1.09672e-05	1.15582e-05
Isosphaerales	0.000700339	0.000800826	0.000815845	0.000820641	0.000837461	0.000810795	0.000787421	0.000794414	0.000667871	0.000708427	0.000711106	0.000699345	0.000767719	0.000706787	0.000777333	0.000808367	0.000568723	0.000517355	0.00056474	0.000523855	0.000645878	0.000508407	0.00053336	0.000605945
Jaapiales	9.30305e-08	2.37309e-07	3.8965e-07	1.95639e-07	2.23544e-07	3.3922e-07	1.2061e-07	3.14812e-08	7.66761e-07	6.722e-07	0	1.96778e-07	1.41735e-07	1.52815e-07	2.6981e-07	1.08095e-07	8.54335e-08	0	0	1.2553e-07	2.47095e-07	1.096e-06	5.67993e-07	8.04118e-07
Jiangellales	0.000139476	0.000172013	0.000188746	0.000164731	0.000218077	0.000227412	0.000229243	0.000234794	0.00037428	0.0004549	0.000305932	0.000301303	0.000196747	0.000192317	0.00020904	0.000186723	0.000192839	0.000212343	0.00020814	0.000177678	0.000180404	0.000136401	0.000169769	0.000161063
Jingchuvirales	0	0	0	0	0	0	0	0	0	1.1358e-06	0	0	0	0	0	0	0	0	0	0	0	0	0	0
Kalamavirales	1.93275e-06	1.12303e-05	5.49484e-06	5.43001e-06	1.25978e-05	1.46585e-05	9.62259e-06	1.12453e-05	9.60026e-06	4.32567e-06	2.22637e-06	4.858e-06	5.59179e-06	6.77996e-06	2.28072e-06	4.71628e-06	8.4341e-07	5.3347e-06	5.2633e-07	8.74507e-07	1.90926e-05	2.39856e-06	4.37529e-06	6.50168e-06
Kallotenuales	0.000149584	0.000169574	0.000148266	0.000155955	0.000153734	0.000197843	0.000158847	0.000137447	0.000152398	0.000154423	0.000172317	0.000154679	0.000186428	0.0001621	0.000177682	0.000169274	0.0001224	0.000143057	0.000125489	0.000119801	0.00015522	0.000126776	0.000147373	0.000152837
Kickxellales	3.80008e-07	0	2.69436e-07	0	1.82156e-06	5.90766e-07	0	1.32983e-06	1.63975e-06	1.80954e-06	5.88855e-07	1.61386e-06	1.91708e-06	6.20798e-06	7.22729e-07	1.94223e-06	2.35453e-06	2.37617e-06	3.84413e-06	8.13648e-06	8.76578e-07	8.52479e-06	4.75465e-06	1.28094e-06
Kiloniellales	5.02729e-05	5.12769e-05	4.59511e-05	4.51759e-05	3.92805e-05	4.23133e-05	4.13747e-05	4.29836e-05	7.33145e-05	6.34574e-05	7.37298e-05	6.41381e-05	5.72534e-05	4.10647e-05	4.41616e-05	5.5306e-05	0.000166142	7.59129e-05	7.31652e-05	6.05418e-05	3.90747e-05	3.51421e-05	3.72333e-05	4.66163e-05
Kineosporiales	0.000107312	0.000137253	0.000158501	0.000161489	0.000193614	0.000194182	0.000227201	0.000181014	0.000110969	0.000127178	0.000124464	0.000114084	0.00013807	0.000132186	0.00016672	0.000128107	0.000204529	0.000227009	0.000157857	0.000217121	0.000423098	0.000370031	0.000614449	0.000478286
Kiritimatiellales	2.87321e-05	3.29698e-05	2.72934e-05	3.05108e-05	2.91431e-05	2.66567e-05	2.57515e-05	2.41453e-05	2.19107e-05	2.51539e-05	2.26523e-05	2.56314e-05	2.72017e-05	2.28246e-05	2.34971e-05	2.95746e-05	1.7476e-05	2.0685e-05	1.50892e-05	1.64628e-05	1.33894e-05	1.60848e-05	1.26307e-05	1.74256e-05
Kordiimonadales	2.35662e-05	1.90408e-05	2.63004e-05	1.95031e-05	1.47968e-05	2.21426e-05	2.35658e-05	2.29524e-05	2.20311e-05	2.2326e-05	2.65069e-05	2.24729e-05	2.49632e-05	1.95162e-05	2.317e-05	1.96147e-05	2.20372e-05	2.98266e-05	1.70223e-05	2.32658e-05	2.19382e-05	1.54349e-05	2.11215e-05	1.93992e-05
Kosmotogales	3.12992e-06	3.8181e-06	5.37017e-06	5.43481e-06	5.42415e-06	2.83242e-06	4.77483e-06	4.04388e-06	3.74472e-06	7.42649e-06	5.17763e-06	6.37772e-06	4.68984e-06	5.69382e-06	4.81105e-06	5.20867e-06	4.76848e-06	3.54697e-06	5.72873e-06	3.96387e-06	4.07866e-06	3.64031e-06	2.91993e-06	3.35737e-06
Ktedonobacterales	0.00250384	0.00381755	0.00171234	0.00373614	0.00367062	0.00398316	0.00531099	0.00374259	0.00160752	0.00213271	0.00169836	0.00167898	0.0033708	0.00354687	0.00317866	0.00328266	0.000642696	0.000528116	0.000482575	0.000518972	0.000999123	0.000635326	0.000884853	0.000911886
Lactobacillales	0.00148852	0.000709443	0.00290169	0.000423868	0.00296546	0.00186056	0.000572204	0.00710329	0.0100634	0.0161098	0.0041764	0.0186785	0.0103189	0.0350372	0.00778824	0.0099197	0.0163219	0.0208491	0.0259681	0.0388246	0.00874575	0.0596464	0.0397118	0.0146663
Lecanorales	6.06957e-08	2.86815e-07	0	3.57023e-07	0	0	4.58671e-07	3.60326e-07	3.12987e-07	0	1.95003e-07	7.46997e-07	0	1.12178e-06	8.5554e-08	8.19754e-08	1.97789e-07	8.4204e-07	6.69486e-07	8.097e-07	7.57724e-07	2.50756e-06	9.06465e-07	2.02117e-07
Legionellales	9.74719e-05	0.000130817	0.000129154	0.000143557	0.000127697	0.000125927	0.000128721	0.000118501	0.00014155	0.000173214	0.000148134	0.00016174	0.00015627	0.000132782	0.000132883	0.000157347	8.95707e-05	9.30478e-05	9.31614e-05	8.26523e-05	0.000101013	7.92838e-05	8.1553e-05	9.54351e-05
Lentisphaerales	5.70796e-06	7.01782e-06	7.65894e-06	6.45772e-06	7.83197e-06	5.90935e-06	8.22182e-06	6.65268e-06	7.88281e-06	9.2706e-06	8.38179e-06	8.30792e-06	5.22329e-06	5.35309e-06	5.45733e-06	5.01843e-06	4.91804e-06	6.77621e-06	4.56411e-06	4.12566e-06	6.34679e-06	3.59445e-06	5.28681e-06	5.51238e-06
Leptospirales	6.56054e-05	8.33988e-05	8.56692e-05	8.67983e-05	7.98286e-05	7.99689e-05	8.24234e-05	7.47206e-05	7.23481e-05	7.10109e-05	6.93958e-05	7.51986e-05	8.43139e-05	7.0217e-05	8.36664e-05	8.43766e-05	8.78912e-05	6.40478e-05	6.05363e-05	6.30147e-05	8.17939e-05	5.66782e-05	5.69794e-05	6.5841e-05
Leucosporidiales	0	5.40276e-07	0	0	0	0	1.06814e-07	0	0	2.86009e-07	0	0	6.42577e-08	1.66431e-07	0	0	8.93524e-08	5.7132e-07	3.10859e-07	9.59709e-08	0	7.66485e-08	2.38228e-07	0
Limnochordales	1.07193e-05	8.14196e-06	9.53175e-06	7.65254e-06	8.68744e-06	1.08447e-05	1.07636e-05	7.04105e-06	1.11237e-05	9.40862e-06	1.24233e-05	1.25723e-05	1.08653e-05	9.39272e-06	1.21948e-05	1.14617e-05	1.63433e-05	1.27565e-05	1.3629e-05	1.04436e-05	1.48912e-05	9.45659e-06	1.06424e-05	1.23537e-05
Lineolatales	0	0	0	0	0	0	0	0	0	0	0	0	0	0	2.72906e-07	0	0	0	0	0	0	0	0	0
Longimicrobiales	0.000434987	0.000382034	0.000469748	0.000686774	0.000879719	0.00044832	0.000448207	0.000396698	0.000419843	0.000493239	0.000751484	0.000426847	0.000399585	0.000395243	0.000546547	0.000576822	0.000413462	0.000553823	0.000356754	0.000449127	0.000582129	0.000434108	0.000477074	0.000636378
Magnaporthales	2.47864e-06	2.37977e-06	2.41708e-06	2.58264e-06	1.56021e-06	2.22319e-06	3.04927e-06	2.57955e-06	1.82146e-06	1.68434e-06	1.4988e-06	1.1456e-06	2.4216e-06	2.88516e-06	2.01656e-06	2.07554e-06	1.13021e-06	1.47865e-06	1.4279e-06	2.40263e-06	6.94881e-07	1.69469e-06	6.82117e-07	1.11537e-06
Magnetococcales	2.28342e-05	2.38373e-05	2.302e-05	2.70947e-05	2.08207e-05	2.14351e-05	2.03489e-05	1.95678e-05	2.36157e-05	1.99516e-05	2.13532e-05	2.16995e-05	1.92994e-05	1.95022e-05	2.01774e-05	2.38262e-05	2.04987e-05	2.01268e-05	2.02219e-05	1.68972e-05	2.01799e-05	1.44255e-05	1.33841e-05	1.55738e-05
Malasseziales	1.57739e-06	1.33905e-06	2.78591e-06	1.77571e-06	2.40799e-06	3.13607e-06	1.21526e-06	2.01332e-06	7.44583e-07	2.49883e-06	1.99974e-06	3.91163e-07	7.59505e-07	1.90446e-06	1.00906e-06	1.32458e-06	4.00402e-07	6.91775e-07	1.37165e-06	7.83754e-07	1.10538e-06	3.44e-06	2.53096e-06	7.2251e-07
Marinilabiliales	0.000198099	0.000231712	0.000298783	0.000158869	0.000201369	0.000174348	0.000168606	0.00018994	0.000342823	0.000368273	0.000222602	0.000380525	0.00026574	0.00039843	0.000235711	0.000253463	0.000322407	0.000409929	0.00035626	0.000405416	0.000245813	0.000509929	0.000387849	0.000260889
Mariprofundales	1.63416e-05	1.79893e-05	1.68463e-05	1.65964e-05	1.84255e-05	1.53201e-05	1.41707e-05	1.29646e-05	2.0961e-05	1.49701e-05	2.11618e-05	1.75732e-05	1.71856e-05	1.63627e-05	1.78313e-05	1.50104e-05	1.53034e-05	1.12724e-05	1.14111e-05	1.43232e-05	2.1601e-05	1.12836e-05	1.6364e-05	1.39399e-05
Martellivirales	0	0	0	0	0	0	0	0	7.69913e-08	7.79375e-08	0	6.97578e-08	0	1.35837e-07	0	2.91832e-07	0	0	0	0	0	3.34188e-07	1.73112e-07	9.60055e-08
Mesoaciditogales	2.41082e-07	2.87581e-07	1.05054e-06	4.38338e-07	3.71722e-07	1.40274e-06	4.75844e-07	3.00562e-07	5.34662e-08	2.16493e-07	4.88422e-07	2.457e-07	5.37344e-07	0	8.77539e-07	6.31631e-07	3.74593e-07	1.4283e-07	0	5.07554e-07	1.1031e-07	1.16755e-06	0	2.0241e-07
Methanobacteriales	9.71194e-06	1.31804e-05	1.36417e-05	1.29772e-05	1.36017e-05	1.25018e-05	1.41493e-05	1.0064e-05	1.38197e-05	1.78646e-05	1.84946e-05	1.89618e-05	1.30504e-05	1.35336e-05	1.79134e-05	1.51915e-05	1.06469e-05	1.42802e-05	1.27973e-05	1.27322e-05	1.14172e-05	1.27458e-05	1.18823e-05	1.34596e-05
Methanocellales	1.14863e-05	1.11454e-05	9.63736e-06	7.90368e-06	8.47357e-06	1.20337e-05	9.19425e-06	9.33641e-06	7.9052e-06	9.96047e-06	1.05159e-05	1.08807e-05	1.18183e-05	1.04699e-05	1.10401e-05	1.07511e-05	9.76898e-06	1.05175e-05	6.86399e-06	7.808e-06	8.09271e-06	9.94152e-06	9.53566e-06	1.03651e-05
Methanococcales	3.80645e-06	2.83632e-06	2.31914e-06	1.62735e-06	3.57225e-06	4.70263e-06	3.75328e-06	2.16804e-06	4.62489e-06	3.31266e-06	3.83589e-06	3.2018e-06	2.30002e-06	4.3778e-06	3.42042e-06	2.38498e-06	2.41805e-06	1.38344e-06	3.01797e-06	1.69026e-06	2.47251e-06	1.31787e-06	2.18286e-06	4.48873e-06
Methanomassiliicoccales	7.94377e-06	8.96091e-06	9.62791e-06	1.15805e-05	1.14889e-05	9.13182e-06	1.01233e-05	8.00316e-06	5.44403e-06	1.01419e-05	1.16859e-05	1.08953e-05	1.11191e-05	1.01393e-05	9.94488e-06	1.13609e-05	5.75974e-06	4.91589e-06	6.55228e-06	4.14503e-06	6.14366e-06	6.16452e-06	4.66652e-06	6.67707e-06
Methanomicrobiales	5.23997e-05	5.4942e-05	5.9353e-05	6.17285e-05	5.89996e-05	5.33326e-05	4.87136e-05	5.05628e-05	5.44067e-05	5.76079e-05	6.6164e-05	6.13549e-05	5.958e-05	5.33319e-05	6.01871e-05	5.70629e-05	5.20057e-05	5.13448e-05	5.11383e-05	4.30612e-05	6.21498e-05	5.30711e-05	5.12122e-05	5.47733e-05
Methanonatronarchaeales	0	0	0	6.8078e-07	0	0	0	0	0	0	3.7683e-07	2.7536e-07	0	4.89174e-07	0	0	1.09432e-07	2.77806e-07	9.23434e-08	6.63869e-07	0	1.48605e-07	0	2.66682e-07
Methanophagales	1.10343e-05	1.35739e-05	1.47323e-05	2.40349e-05	1.37432e-05	1.54704e-05	1.52379e-05	1.43392e-05	1.24197e-05	2.0386e-05	1.60961e-05	2.00904e-05	1.55906e-05	1.51856e-05	1.61327e-05	1.61542e-05	1.33279e-05	1.70394e-05	1.33513e-05	1.07742e-05	1.54445e-05	1.38262e-05	1.012e-05	1.86929e-05
Methanopyrales	0	0	0	0	0	0	0	0	0	0	0	0	0	0	0	0	0	0	1.17652e-07	0	1.83851e-07	4.3514e-07	0	0
Methanosarcinales	0.000175746	0.000171943	0.000187867	0.000189505	0.000176632	0.00018215	0.000176044	0.000167714	0.000175242	0.000183083	0.000217411	0.000186628	0.000175609	0.000164303	0.000167179	0.000172666	0.000180285	0.000175693	0.000184464	0.000171322	0.000205201	0.000160085	0.000164723	0.000191663
Methylacidiphilales	7.39156e-06	1.11229e-05	6.82815e-06	8.34835e-06	7.47888e-06	5.706e-06	5.20746e-06	8.31057e-06	9.20522e-06	5.63467e-06	1.02512e-05	9.86941e-06	8.87935e-06	8.47641e-06	6.46319e-06	8.70263e-06	1.1131e-05	1.36369e-05	9.72149e-06	9.3998e-06	1.03032e-05	6.23458e-06	9.6267e-06	8.08167e-06
Methylococcales	0.00087757	0.000872663	0.000931364	0.000969038	0.000858939	0.000852846	0.000960456	0.000880521	0.000834516	0.000805107	0.000864478	0.000851448	0.000852169	0.00076596	0.000854051	0.000833528	0.000809368	0.000781398	0.00078342	0.000738125	0.000825261	0.000695553	0.000759227	0.000844362
Microascales	5.36374e-07	3.7227e-07	9.66694e-07	6.72341e-07	9.13468e-07	3.17176e-07	7.64217e-07	9.89139e-07	1.32266e-06	1.25528e-06	1.20038e-05	1.78053e-06	6.5486e-07	5.22437e-07	4.78009e-07	1.34209e-06	1.39135e-07	1.79711e-06	1.51087e-06	8.10631e-07	0	1.08502e-07	2.75714e-06	6.4599e-07
Microbotryales	3.2588e-07	4.91437e-07	1.24604e-06	5.5165e-08	5.86181e-07	3.8809e-07	5.15624e-07	1.37228e-06	1.62346e-06	3.3632e-06	9.63239e-07	2.36446e-06	1.06142e-06	6.72393e-06	1.99213e-06	3.04615e-06	2.26563e-06	4.94791e-06	3.793e-06	7.0417e-06	2.639e-06	1.19348e-05	5.8058e-06	2.9465e-06
Micrococcales	0.00129796	0.00149935	0.00196251	0.00156466	0.00193398	0.00195353	0.00201831	0.00211899	0.00169722	0.00182123	0.00168396	0.00166836	0.00168709	0.00206487	0.00174876	0.00172427	0.00175531	0.00186729	0.00173484	0.00179149	0.00171064	0.00180496	0.00196467	0.00178965
Micromonosporales	0.00451615	0.00494361	0.0044646	0.00525579	0.0049662	0.00697816	0.00579393	0.0140201	0.00510932	0.0046673	0.00705943	0.00437745	0.00533342	0.00450169	0.00476077	0.00441541	0.00326755	0.00582822	0.00300683	0.00318932	0.00612611	0.00301097	0.00738686	0.00380767
Micropepsales	0.000570412	0.000679887	0.000710758	0.000652876	0.000967843	0.000903915	0.000898944	0.00113213	0.000381536	0.000349556	0.000341037	0.000328067	0.000651889	0.000617167	0.00048114	0.000671287	0.00049874	0.00048854	0.000462364	0.000385492	0.000403456	0.000315106	0.000459464	0.000482864
Microstromatales	0	3.24166e-07	0	0	0	1.08704e-07	0	0	7.74957e-07	6.50344e-07	0	2.69795e-07	8.28563e-07	1.21915e-06	1.01219e-07	3.07044e-07	4.93495e-07	7.53031e-07	8.68937e-07	5.54023e-07	0	1.11014e-06	1.2516e-06	4.62744e-07
Microthyriales	1.0163e-07	0	3.72812e-07	3.01662e-07	0	1.31992e-06	3.03795e-07	2.96158e-07	5.8967e-07	8.35279e-07	8.76349e-08	7.53816e-07	5.10307e-07	7.93249e-07	2.99439e-07	0	1.13249e-07	1.6353e-07	1.63689e-07	7.02176e-07	0	4.73177e-07	4.5387e-07	2.43052e-07
Minwuiales	6.3046e-06	1.1124e-05	4.55181e-06	5.77764e-06	8.46384e-06	7.2032e-06	7.49916e-06	7.17582e-06	7.80578e-06	7.57039e-06	8.13038e-06	7.67764e-06	8.07459e-06	6.84505e-06	8.80813e-06	5.80237e-06	1.07874e-05	7.05034e-06	5.69848e-06	1.37293e-05	3.17065e-06	4.30775e-06	5.53778e-06	6.59364e-06
Mixiales	0	2.99545e-07	2.83148e-07	1.10609e-06	1.72289e-07	4.88478e-07	7.89611e-07	5.74871e-07	4.87287e-07	3.45763e-07	1.67177e-07	0	0	8.81833e-07	1.16007e-06	1.1091e-06	1.23284e-07	1.4283e-07	0	5.63712e-07	4.46827e-07	4.23022e-07	9.30711e-08	3.64578e-07
Moniliellales	0	0	0	0	4.09964e-07	9.29874e-08	9.39447e-08	0	0	0	0	8.40455e-08	0	0	0	0	0	0	0	0	0	0	0	0
Monoblepharidales	7.31574e-07	8.71508e-07	1.60144e-06	1.06172e-06	1.25962e-06	6.75311e-07	1.9824e-06	2.24343e-06	2.49023e-06	2.86639e-06	1.24899e-06	2.79206e-06	1.28215e-06	6.1509e-06	1.05978e-06	2.77938e-06	2.68423e-06	5.01343e-06	3.95949e-06	4.56611e-06	1.59222e-06	8.61181e-06	6.27043e-06	2.42689e-06
Mortierellales	2.97407e-06	3.97795e-06	4.04152e-06	1.69583e-06	4.71192e-06	2.76881e-06	2.54584e-06	6.06332e-06	9.46106e-06	9.23468e-06	3.64293e-06	1.03949e-05	4.78439e-06	1.55866e-05	2.93663e-06	6.83685e-06	5.26715e-06	1.19842e-05	1.15195e-05	1.27791e-05	4.93669e-06	3.04948e-05	1.7917e-05	9.601e-06
Mucorales	1.17356e-05	1.55827e-05	1.67521e-05	9.64353e-06	1.88488e-05	1.44954e-05	1.07559e-05	2.46979e-05	3.95383e-05	4.82657e-05	2.24648e-05	4.12213e-05	2.94603e-05	7.74997e-05	2.33007e-05	2.30741e-05	4.43188e-05	4.86308e-05	6.24583e-05	8.51815e-05	3.39086e-05	0.00013595	8.5015e-05	3.80085e-05
Mycocaliciales	0	0	0	0	0	0	0	0	0	1.7514e-07	0	0	0	0	0	0	0	6.33909e-07	0	0	0	9.38729e-08	0	0
Mycoplasmatales	1.35133e-05	2.11546e-05	8.38406e-06	9.61756e-06	9.12498e-06	8.02574e-06	8.52865e-06	8.67117e-06	1.93107e-05	2.14288e-05	1.06222e-05	8.67758e-06	2.14263e-05	1.4864e-05	7.31311e-06	8.31911e-06	9.68735e-06	1.36049e-05	2.48784e-06	2.91448e-06	8.03534e-06	8.58601e-06	6.77294e-06	7.57276e-06
Mycosphaerellales	3.5576e-06	5.92148e-06	9.48121e-06	3.59605e-06	9.51366e-06	4.8273e-06	9.94297e-06	9.81194e-06	1.40664e-05	1.91847e-05	8.31321e-06	2.08652e-05	1.29545e-05	3.5971e-05	1.08493e-05	1.45023e-05	2.39577e-05	2.74561e-05	2.49971e-05	3.55492e-05	1.38772e-05	5.53753e-05	3.98231e-05	1.59548e-05
Myriangiales	0	1.56199e-07	5.34904e-07	1.58875e-07	5.80177e-07	2.82862e-07	9.51773e-07	4.99706e-07	2.78013e-07	5.45336e-07	1.44875e-06	9.0956e-07	3.71098e-07	2.13718e-06	8.23864e-07	5.12383e-07	3.95868e-07	6.48481e-08	5.34644e-07	1.21325e-06	1.3931e-07	3.13256e-06	1.13401e-06	1.3536e-06
Mytilinidiales	6.84745e-07	4.53055e-07	7.787e-07	1.93972e-06	6.91198e-07	1.11675e-06	1.32439e-06	1.77175e-06	8.62566e-07	4.71952e-07	2.6586e-06	4.88736e-07	9.35262e-07	2.35999e-06	4.8882e-07	1.64136e-06	7.3237e-07	1.20214e-06	7.16112e-07	8.57997e-07	1.18466e-06	3.02548e-06	1.02541e-06	1.06851e-06
Myxococcales	0.0176438	0.0249857	0.021961	0.0220869	0.0224277	0.0221776	0.0264007	0.0202219	0.0157433	0.0168641	0.0152342	0.0153084	0.0201089	0.0181699	0.0214305	0.0212236	0.0130671	0.014744	0.0113117	0.0148248	0.0142781	0.00963359	0.0144519	0.0130468
Nakamurellales	5.30511e-05	5.59893e-05	0.000188493	5.60652e-05	7.21688e-05	6.84701e-05	7.1236e-05	7.1201e-05	5.34656e-05	5.08669e-05	5.40168e-05	4.46047e-05	5.01596e-05	5.00962e-05	5.62228e-05	5.58041e-05	4.98008e-05	4.81271e-05	4.66184e-05	4.12126e-05	4.27121e-05	3.65129e-05	4.83677e-05	4.10668e-05
Nanoarchaeales	8.87033e-07	2.87072e-07	4.4307e-07	7.66832e-07	1.0019e-06	1.02891e-06	7.59937e-07	8.22629e-07	5.00961e-07	5.65982e-07	3.88898e-07	5.60629e-07	1.35218e-06	1.20053e-06	8.72318e-07	1.61257e-06	7.0245e-07	5.61573e-07	1.56358e-07	4.35229e-07	4.18939e-07	5.44333e-07	3.62131e-07	1.73416e-07
Natranaerobiales	4.37733e-07	1.05174e-07	3.21991e-07	4.7251e-07	2.58433e-07	5.1735e-07	2.77241e-07	1.00036e-07	9.21194e-07	5.41233e-07	1.6748e-07	1.74394e-07	6.19545e-07	4.58836e-07	1.75671e-07	3.21874e-07	0	0	1.68575e-07	0	0	4.72809e-07	8.28423e-07	0
Natrialbales	2.20169e-05	2.11222e-05	2.63751e-05	2.47918e-05	2.1435e-05	1.85006e-05	2.32775e-05	2.14347e-05	1.98864e-05	2.615e-05	2.18625e-05	2.6641e-05	2.37046e-05	1.79855e-05	2.62556e-05	2.4881e-05	1.83175e-05	2.63974e-05	1.97478e-05	1.70616e-05	2.56502e-05	2.11707e-05	2.19789e-05	1.86728e-05
Nautiliales	2.94613e-07	0	8.57038e-08	1.22055e-06	6.7422e-07	0	3.6947e-07	2.8506e-07	5.20916e-07	0	2.62905e-07	6.40359e-07	4.30711e-07	2.86109e-07	2.21874e-07	1.00474e-06	0	0	0	0	2.884e-07	9.71475e-08	3.0194e-07	0
Neisseriales	0.000381992	0.00040361	0.000420764	0.000429344	0.000400226	0.000370759	0.000416414	0.000382088	0.000384616	0.000330823	0.000370567	0.00034752	0.000353544	0.000289372	0.000348682	0.000337326	0.000336366	0.000395906	0.000360491	0.000339046	0.000332999	0.000276348	0.000324893	0.000372151
Neocallimastigales	1.25355e-06	1.16294e-06	1.91508e-06	1.35563e-06	4.07996e-06	2.80961e-06	1.66858e-06	3.86775e-06	4.63891e-06	7.41686e-06	2.92122e-06	8.51881e-06	6.30825e-06	1.35735e-05	3.98654e-06	5.07415e-06	4.57372e-06	9.10923e-06	1.2016e-05	1.42792e-05	4.58179e-06	2.86959e-05	1.98259e-05	7.36227e-06
Neolectales	0	0	0	0	4.0751e-08	0	0	5.22435e-07	1.41693e-06	6.48029e-07	4.75252e-07	6.98793e-07	6.61943e-07	2.76361e-06	4.93123e-07	6.02088e-07	9.95213e-07	7.94628e-07	9.66462e-07	2.3713e-06	2.32272e-07	4.7295e-06	3.48433e-06	3.10288e-07
Nevskiales	0.00268435	0.00238744	0.00308674	0.00336789	0.00176883	0.00165877	0.00358093	0.00278557	0.00311845	0.00263364	0.00378824	0.00321877	0.00259128	0.00221486	0.0021968	0.00293647	0.0028293	0.00391738	0.00253173	0.00265847	0.00326679	0.0024519	0.00295386	0.00290781
Nitriliruptorales	0.000105822	0.00010204	0.000100515	0.0001126	0.000136135	0.00014206	0.000142107	0.000147855	0.000168438	0.000171076	0.000141084	0.000163688	0.00013533	0.000189498	0.000145074	0.000145762	0.000211436	0.000227214	0.000234711	0.000234468	0.00012703	0.00025078	0.000194152	0.000138613
Nitrosomonadales	0.00435722	0.00432702	0.00488845	0.00419228	0.00478309	0.00456782	0.00406014	0.00403923	0.0036906	0.0034326	0.00343991	0.00323206	0.0036642	0.00293453	0.003655	0.00354827	0.00377857	0.00388969	0.0040575	0.00351535	0.00352251	0.00320728	0.00340689	0.00423573
Nitrosopumilales	0.00605889	0.00336736	0.00420184	0.00432355	0.0040868	0.00476033	0.00409496	0.00420085	0.00715468	0.00739307	0.00939207	0.00846108	0.00624589	0.00570288	0.00558797	0.0060774	0.00948289	0.0083061	0.0106506	0.00911584	0.0105588	0.00934832	0.00725767	0.00998786
Nitrososphaerales	0.000987601	0.000964813	0.000833009	0.000875651	0.00116488	0.00136472	0.00116809	0.0011924	0.00108683	0.0010855	0.00158805	0.00159073	0.00101702	0.000949193	0.000802963	0.00115217	0.0014283	0.00158262	0.00181119	0.0016454	0.00186425	0.00159709	0.00149468	0.001771
Nitrospinales	1.82918e-05	2.2173e-05	2.30099e-05	1.73311e-05	1.93698e-05	1.84955e-05	2.32649e-05	1.6901e-05	1.88935e-05	1.84878e-05	2.20002e-05	2.0445e-05	1.87316e-05	1.57761e-05	2.18012e-05	1.73499e-05	2.00349e-05	2.12849e-05	2.48921e-05	1.91452e-05	2.16171e-05	1.5044e-05	1.28337e-05	1.66378e-05
Nitrospirales	0.00658309	0.00610466	0.0060249	0.00569242	0.00465673	0.00535935	0.00459055	0.00492937	0.00502294	0.00489305	0.00546737	0.00516958	0.00617482	0.00577418	0.00551937	0.0060662	0.00527239	0.00439383	0.00491641	0.00463531	0.0076863	0.00632995	0.00634171	0.00684617
Nostocales	0.00136758	0.00130121	0.00142738	0.00141926	0.00145876	0.00144399	0.00152715	0.00132411	0.00127987	0.00128475	0.00144889	0.00136134	0.00127838	0.00119789	0.00129338	0.00125876	0.0012959	0.00118087	0.00124417	0.00117037	0.00144667	0.00117662	0.0012007	0.001358
Oceanospirillales	0.000507719	0.000523905	0.000535656	0.000565955	0.000490895	0.00049419	0.000536049	0.00057958	0.000619356	0.000699978	0.000540433	0.000726271	0.000658629	0.000944065	0.000623349	0.000618773	0.000688833	0.000792813	0.000785634	0.000933981	0.000573915	0.00114112	0.000943399	0.000631469
Oligoflexales	2.23007e-05	3.35501e-05	2.45593e-05	3.22415e-05	3.18742e-05	2.58934e-05	2.86984e-05	2.63377e-05	2.83363e-05	2.14905e-05	2.76415e-05	2.53502e-05	3.16554e-05	2.94545e-05	3.06814e-05	3.3212e-05	2.18869e-05	2.86395e-05	2.15642e-05	1.76932e-05	2.17348e-05	1.72534e-05	2.60204e-05	1.98644e-05
Oligosphaerales	6.17391e-07	6.87738e-07	5.16164e-07	4.11099e-07	8.26724e-07	1.10246e-06	5.20745e-07	2.01593e-07	0	1.4992e-07	2.03692e-07	6.64236e-07	4.37756e-07	5.10116e-07	9.19702e-07	7.34513e-07	0	8.69233e-07	0	6.72626e-07	1.1031e-07	0	4.12551e-07	2.37608e-07
Olpidiales	8.24545e-08	0	7.03418e-08	0	0	0	0	7.07799e-08	0	2.20578e-07	0	2.63237e-07	0	3.2037e-07	0	0	0	2.12898e-07	1.06552e-07	4.11015e-07	0	6.69518e-07	6.11977e-07	1.96072e-07
Onygenales	7.8714e-07	1.00654e-06	1.81285e-06	1.09201e-06	1.29005e-06	7.95666e-08	1.61963e-06	1.7482e-06	1.31289e-06	2.70615e-06	2.53322e-06	3.0366e-06	1.39718e-06	4.1874e-06	1.57331e-06	2.41236e-06	2.17311e-06	2.37296e-06	2.40734e-06	5.46949e-06	3.08976e-06	3.24537e-06	3.71731e-06	1.02917e-06
Ophiostomatales	3.38329e-07	7.91012e-07	1.11201e-06	2.25659e-07	4.58149e-07	4.68106e-07	1.93873e-06	1.48177e-06	1.06352e-06	2.0118e-06	2.292e-06	9.07872e-07	1.44117e-06	8.69529e-07	1.81938e-07	1.59794e-06	1.18687e-06	2.41747e-06	4.29015e-07	2.63924e-06	1.22591e-06	3.66053e-06	7.12936e-07	4.36731e-07
Opitutales	0.00219022	0.00278171	0.00264672	0.00268959	0.00220078	0.00244881	0.00194126	0.00233263	0.00290848	0.00330718	0.00280772	0.00256234	0.00395013	0.0025709	0.00311705	0.00334765	0.00289694	0.00314239	0.0029677	0.00312584	0.00239037	0.00208414	0.00218585	0.00234149
Orbales	8.14976e-07	3.12087e-06	2.22191e-06	1.94531e-06	1.07367e-06	1.70406e-06	1.64579e-06	1.976e-06	1.57062e-06	1.28409e-06	1.72148e-06	7.11132e-07	2.51543e-06	1.63288e-06	1.65823e-06	1.95609e-06	1.18483e-05	1.16784e-06	2.5802e-06	1.10518e-06	1.85291e-06	1.89273e-06	1.9851e-06	1.4851e-06
Orbiliales	4.16728e-06	3.6582e-06	5.91021e-06	4.1e-06	7.98118e-06	5.23468e-06	5.49335e-06	5.8376e-06	6.47256e-06	5.81946e-06	5.66691e-06	4.68616e-06	6.062e-06	9.21564e-06	3.71744e-06	7.20775e-06	3.18842e-06	4.32966e-06	2.79385e-06	5.58188e-06	3.18498e-06	6.39529e-06	3.19101e-06	3.51229e-06
Ortervirales	1.90464e-05	1.22695e-05	4.457e-05	5.17113e-06	3.63477e-05	2.39187e-05	6.83291e-06	8.91464e-05	0.000122359	0.000198018	4.79072e-05	0.000224878	0.000127282	0.000433508	7.86192e-05	0.000125627	0.000216025	0.000283771	0.000333266	0.000500815	0.000124335	0.000834003	0.000513108	0.000182568
Oscillatoriales	0.00074078	0.0007372	0.00078682	0.00077854	0.000795725	0.00102763	0.000930484	0.000699652	0.000752279	0.00079371	0.00084693	0.000781657	0.000735694	0.000667575	0.000760077	0.000751019	0.000749765	0.000715637	0.000726072	0.000723711	0.000785602	0.000688778	0.000684434	0.000752469
Pansporoblastina	5.71787e-07	7.37199e-08	4.44555e-07	3.05529e-07	7.94184e-07	7.56663e-08	1.45746e-07	0	0	3.97148e-07	0	4.95827e-07	4.95387e-07	1.37996e-06	0	2.6912e-07	1.15945e-07	7.86387e-07	1.17652e-07	5.68338e-07	1.05057e-07	2.1382e-06	1.2089e-06	0
Parachlamydiales	3.24279e-05	4.18102e-05	3.58011e-05	4.73399e-05	3.95837e-05	3.70702e-05	3.68243e-05	4.30876e-05	3.99092e-05	5.14129e-05	4.86978e-05	4.49188e-05	0.000124785	0.000173591	7.94602e-05	0.000139994	3.67043e-05	2.44915e-05	3.04737e-05	3.48765e-05	3.8651e-05	3.35481e-05	3.07814e-05	3.45733e-05
Parvularculales	7.61237e-05	5.68969e-05	8.09358e-05	9.15079e-05	6.89043e-05	6.94952e-05	0.000126638	8.53617e-05	7.08796e-05	7.27412e-05	8.08656e-05	7.59014e-05	6.95638e-05	6.53867e-05	7.51036e-05	7.84337e-05	0.000101426	9.21578e-05	0.000105366	7.57841e-05	7.5985e-05	5.66134e-05	6.824e-05	8.0608e-05
Pasteurellales	1.41799e-05	1.79326e-05	2.07718e-05	1.48956e-05	1.84749e-05	1.24226e-05	1.02507e-05	1.19401e-05	2.24853e-05	1.86194e-05	1.6532e-05	1.18452e-05	1.49863e-05	1.28384e-05	1.49106e-05	9.23038e-06	1.33849e-05	2.34593e-05	1.22914e-05	1.52766e-05	1.36086e-05	1.55134e-05	1.12829e-05	1.37749e-05
Patellariales	0	4.66111e-07	4.31352e-07	6.8456e-07	1.12486e-07	0	1.50857e-07	7.22683e-07	2.99194e-07	6.86703e-07	8.40159e-07	5.7651e-08	8.75511e-08	6.46261e-07	6.49082e-07	6.0296e-08	0	1.38314e-06	2.71642e-06	5.26438e-07	2.09383e-06	4.68487e-07	1.07549e-06	7.06465e-07
Pelagibacterales	1.08836e-05	1.20174e-05	1.47296e-05	1.31318e-05	1.29152e-05	1.34681e-05	1.28222e-05	9.70969e-06	1.0032e-05	1.00258e-05	9.48762e-06	1.33975e-05	1.57678e-05	1.56731e-05	1.18476e-05	1.01908e-05	1.25448e-05	1.5154e-05	1.25271e-05	1.18363e-05	1.31553e-05	1.25131e-05	1.03838e-05	1.52485e-05
Peltigerales	7.16408e-08	6.4656e-08	0	6.51127e-08	3.29625e-07	0	1.64734e-07	5.68434e-07	6.08382e-07	1.27766e-07	1.95756e-07	1.3972e-07	9.09622e-08	5.96118e-07	0	1.02758e-07	1.37175e-07	0	1.46682e-07	1.46255e-06	1.14608e-07	1.55292e-07	0	0
Petitvirales	0	0	6.11075e-07	3.34474e-07	0	0	0	0	0	0	6.91431e-08	6.39979e-08	0	2.49242e-07	0	0	0	0	0	0	0	0	0	0
Petrotogales	1.30004e-06	2.86164e-06	1.35517e-06	1.30677e-06	2.10782e-06	1.59103e-06	2.41268e-06	2.3732e-06	1.49648e-06	1.77353e-06	4.07869e-06	7.86458e-07	1.33096e-06	1.59332e-06	1.74448e-06	1.15776e-06	2.69243e-06	2.64958e-06	1.98499e-06	2.7283e-06	3.69961e-06	5.2389e-07	1.28683e-06	1.81077e-06
Pezizales	1.84245e-06	3.48513e-06	2.51905e-06	2.02622e-06	4.23531e-06	1.69033e-06	2.45476e-06	3.9258e-06	3.7949e-06	4.24821e-06	2.40058e-06	6.82826e-06	3.6071e-06	1.15836e-05	2.63679e-06	4.77389e-06	5.23774e-06	6.23528e-06	5.95832e-06	1.09568e-05	2.65782e-06	1.25547e-05	6.14894e-06	3.70997e-06
Phaeomoniellales	1.05702e-07	6.6286e-08	6.26206e-07	4.5696e-07	4.47097e-07	1.21543e-07	8.81238e-08	1.02124e-07	4.58422e-07	2.43555e-07	3.94386e-07	4.03287e-08	1.71608e-07	2.10984e-07	5.98312e-07	6.82373e-07	8.18438e-08	2.66541e-07	5.88258e-08	8.26205e-07	0	7.92004e-07	3.9911e-07	5.00029e-08
Phaeotrichales	0	3.33297e-07	0	0	2.79674e-07	2.17407e-07	0	1.05671e-07	0	3.87848e-07	9.78779e-08	0	0	0	0	9.47508e-08	0	0	0	0	0	3.52633e-07	0	0
Phycisphaerales	0.000759041	0.00105772	0.00105482	0.00105389	0.00104266	0.000978149	0.000910669	0.000899089	0.000715431	0.000809995	0.000740867	0.000770153	0.000859399	0.000788471	0.000840641	0.000919972	0.000805757	0.000506282	0.000493072	0.000457794	0.000619143	0.000486514	0.000535852	0.000560388
Picornavirales	0	0	0	0	0	0	0	0	0	9.03623e-07	0	0	0	9.84324e-08	0	0	1.41151e-07	0	1.63689e-07	0	0	0	0	0
Pimascovirales	7.33783e-07	6.50803e-07	8.36467e-07	9.89898e-07	6.10217e-07	5.05123e-07	5.1321e-07	1.01293e-06	7.05435e-07	6.29177e-07	1.01805e-06	6.62367e-07	1.8516e-06	1.22108e-06	7.25182e-07	7.36896e-07	1.86696e-07	0	3.27378e-07	6.85065e-07	1.39289e-06	8.28375e-07	2.77659e-07	2.43575e-07
Pirellulales	0.00093159	0.00129001	0.00115367	0.00127398	0.00111526	0.00107317	0.000987018	0.000983724	0.000812272	0.000874594	0.000862627	0.000835331	0.000941544	0.000808163	0.000979138	0.000933569	0.000723463	0.000702624	0.00123538	0.000633632	0.000696275	0.000536593	0.000619473	0.000695564
Planctomycetales	0.00166884	0.00188907	0.00197498	0.00213499	0.0018458	0.00184402	0.00178342	0.00171862	0.00175274	0.00195469	0.00190482	0.00188222	0.00199056	0.00167429	0.00191605	0.00203335	0.00152938	0.00145504	0.00191817	0.0013406	0.00151115	0.00122138	0.00132477	0.00149168
Pleosporales	8.13895e-06	8.08869e-06	9.04311e-06	7.76673e-06	8.36401e-06	1.07723e-05	0.000109445	1.3714e-05	1.026e-05	1.33014e-05	1.27399e-05	1.09535e-05	1.06485e-05	2.01212e-05	1.6886e-05	1.63264e-05	9.38869e-06	8.56558e-06	8.66484e-06	1.19713e-05	7.78823e-06	1.92895e-05	1.1619e-05	6.34213e-06
Pleurocapsales	7.92371e-05	7.58885e-05	8.186e-05	8.16525e-05	7.4908e-05	8.43429e-05	7.60622e-05	7.19966e-05	7.15891e-05	7.36793e-05	8.99418e-05	8.19032e-05	6.8854e-05	7.00473e-05	7.22239e-05	6.60668e-05	7.82765e-05	7.04856e-05	6.77875e-05	6.46597e-05	8.5705e-05	6.60224e-05	6.77295e-05	7.96603e-05
Pneumocystidales	1.3045e-07	1.83443e-07	3.0228e-07	8.82639e-08	2.95887e-07	2.38856e-07	1.50648e-07	5.92616e-07	2.6446e-07	1.02363e-06	3.81105e-07	1.53248e-06	6.0408e-07	2.73035e-06	1.13933e-06	1.07291e-07	6.86156e-07	7.23236e-07	2.25395e-06	2.17588e-06	7.15259e-07	4.51872e-06	1.65277e-06	8.4803e-07
Polyporales	9.47198e-06	1.12542e-05	1.43157e-05	1.44633e-05	1.73375e-05	9.74926e-06	7.20725e-06	1.59724e-05	2.28047e-05	2.86911e-05	2.43142e-05	2.90855e-05	1.72081e-05	5.44111e-05	1.52696e-05	1.70194e-05	3.23067e-05	5.58664e-05	3.57229e-05	5.93487e-05	3.68611e-05	0.000112992	5.96329e-05	2.8608e-05
Propionibacteriales	0.00180176	0.00182173	0.00296497	0.00188879	0.00260233	0.00267532	0.00261016	0.0027268	0.00224956	0.00233316	0.00230994	0.00214723	0.00307313	0.00306461	0.00275994	0.00276565	0.00261594	0.0027273	0.00260305	0.00269881	0.00266408	0.00232216	0.00254874	0.00281378
Pseudomonadales	0.00124382	0.00130773	0.00178274	0.00124968	0.00141049	0.00119461	0.00598217	0.00157868	0.00181681	0.0018652	0.00137276	0.00186769	0.00157407	0.00249776	0.00140123	0.00148759	0.00201674	0.00256023	0.00244307	0.00284097	0.00156509	0.00340496	0.00268006	0.00179552
Pseudonocardiales	0.00194618	0.00229224	0.00383169	0.00479236	0.0028878	0.00326513	0.0030578	0.00297166	0.00237195	0.0024522	0.00229805	0.00238268	0.00297379	0.00228791	0.00217376	0.00532068	0.00196804	0.0027109	0.00191907	0.00223085	0.00173531	0.00157383	0.00208274	0.00183376
Pucciniales	8.03606e-06	3.92349e-06	1.62324e-05	2.15071e-06	1.52106e-05	7.52653e-06	3.00046e-06	3.22153e-05	3.91949e-05	6.7143e-05	2.00849e-05	8.10153e-05	4.04184e-05	0.000143347	2.9829e-05	4.29511e-05	6.02025e-05	8.53567e-05	0.000110039	0.000152598	3.89415e-05	0.000238406	0.000160972	6.0654e-05
Puniceicoccales	6.53e-05	7.3549e-05	7.02437e-05	8.28869e-05	6.29341e-05	7.44282e-05	7.06749e-05	6.79324e-05	7.14551e-05	7.11622e-05	6.69513e-05	6.26448e-05	7.69296e-05	5.91078e-05	6.8549e-05	7.90432e-05	7.1393e-05	8.21447e-05	6.97414e-05	6.85646e-05	4.86161e-05	4.65141e-05	5.49384e-05	5.46811e-05
Rhizobiales	0.026861	0.0393521	0.0267144	0.0289868	0.0269955	0.0262714	0.0313513	0.0408743	0.0321217	0.0246214	0.0265766	0.0256067	0.0305391	0.0298167	0.0244975	0.0289139	0.0323305	0.0364987	0.0326246	0.0309381	0.0219052	0.0220552	0.0270837	0.0268844
Rhizophydiales	5.23067e-07	0	1.1568e-06	0	1.17159e-06	4.49368e-07	9.26426e-07	1.73171e-06	4.61341e-06	4.09793e-06	1.70851e-06	5.32886e-06	2.75227e-06	7.13158e-06	3.33704e-06	2.46322e-06	3.36141e-06	4.17375e-06	5.60269e-06	1.0445e-05	3.99926e-06	1.81563e-05	9.72124e-06	3.5741e-06
Rhodobacterales	0.00103619	0.00108325	0.00112974	0.00117815	0.0010495	0.00103201	0.00106296	0.00115461	0.001202	0.00112593	0.00119097	0.0011234	0.00110483	0.0011079	0.00105328	0.00108322	0.00143412	0.00154501	0.00142768	0.00135095	0.00109807	0.00107713	0.00111386	0.00116255
Rhodocyclales	0.00349951	0.00339311	0.0036816	0.00362762	0.0031645	0.00308089	0.00304392	0.00284819	0.00294201	0.00301497	0.00312998	0.00305216	0.00296079	0.0026147	0.00291971	0.00265232	0.00267297	0.00291683	0.00235991	0.00264323	0.00307843	0.00298136	0.00360908	0.00388944
Rhodospirillales	0.0140198	0.0132616	0.0161178	0.0120849	0.0107484	0.0107273	0.0105104	0.0121664	0.0141958	0.0138608	0.014665	0.0131673	0.0123767	0.0137692	0.0101643	0.0127219	0.0145767	0.0167163	0.0151978	0.0149015	0.0113859	0.0107482	0.0116645	0.0135773
Rhodothalassiales	2.93692e-06	3.34153e-06	3.70023e-06	2.80482e-06	2.70042e-06	1.75582e-06	2.32963e-06	2.25664e-06	1.34246e-06	3.84603e-06	3.14693e-06	2.75037e-06	4.76774e-06	3.65177e-06	1.63074e-06	2.97857e-06	3.72739e-06	1.76675e-06	2.93235e-06	3.21943e-06	4.08817e-06	1.71905e-06	1.7361e-06	4.31405e-06
Rhodothermales	9.47403e-05	8.88132e-05	0.000107434	0.000104293	0.000105857	9.32466e-05	9.50416e-05	8.60616e-05	9.92598e-05	0.00010148	0.000106831	0.000104351	0.000104407	8.87529e-05	0.000106032	0.000103624	0.000106226	9.50243e-05	9.20285e-05	8.53972e-05	0.000117195	0.000100119	0.000100208	0.000106137
Rickettsiales	5.5394e-05	4.55599e-05	8.55336e-05	4.49114e-05	7.83817e-05	6.7374e-05	5.09475e-05	0.000177486	0.000213344	0.000323472	0.000102885	0.000358123	0.000211906	0.000658652	0.000174246	0.000217163	0.000321584	0.000422488	0.00048407	0.000731576	0.000228286	0.00108741	0.000699773	0.000292425
Rubrobacterales	0.000499805	0.000558353	0.000510193	0.000551307	0.000550419	0.000545381	0.00057749	0.000542034	0.000544371	0.000578429	0.000589985	0.000563635	0.000594359	0.000557061	0.000639146	0.000590686	0.000557916	0.000506873	0.000526676	0.000507848	0.000566462	0.000501372	0.000535055	0.000575935
Russulales	1.07138e-06	9.32901e-07	1.5246e-06	1.93793e-06	1.57941e-06	2.31988e-06	1.15452e-06	4.30436e-06	3.1208e-06	5.90049e-06	7.53017e-06	6.67142e-06	4.0129e-06	1.18745e-05	2.92248e-06	3.99461e-06	9.19901e-06	1.40092e-05	9.57952e-06	1.14885e-05	6.32845e-06	1.86e-05	1.03563e-05	4.20086e-06
Saccharomycetales	3.07985e-05	2.82085e-05	2.64022e-05	2.59419e-05	3.01003e-05	3.05054e-05	2.46833e-05	3.57759e-05	2.63936e-05	3.25604e-05	2.19091e-05	3.30791e-05	2.43557e-05	5.51641e-05	1.9333e-05	2.53184e-05	2.3766e-05	2.73679e-05	2.7674e-05	4.43649e-05	1.42287e-05	8.20658e-05	4.26394e-05	1.52581e-05
Salinisphaerales	3.50989e-05	3.38116e-05	2.78541e-05	3.69015e-05	2.83871e-05	3.33513e-05	3.28415e-05	3.53975e-05	3.34577e-05	4.50767e-05	4.12696e-05	4.06338e-05	4.34185e-05	3.08098e-05	4.03329e-05	3.81094e-05	3.9875e-05	3.91752e-05	3.90007e-05	3.39392e-05	2.51352e-05	1.88556e-05	2.74704e-05	2.63805e-05
Saprospirales	0.000172395	0.000153217	0.000194428	0.000158915	0.0001292	0.00014592	0.000140271	0.000119341	0.000257821	0.000261962	0.000268171	0.000261821	0.000272463	0.000178615	0.000272674	0.000211081	0.000365046	0.00043103	0.000434109	0.000328554	0.000283706	0.000225448	0.000192456	0.000270307
Schizosaccharomycetales	5.7322e-07	2.46501e-07	0	2.48242e-07	1.9444e-07	3.50262e-07	3.24892e-07	3.43189e-07	2.85618e-07	1.27151e-06	0	1.90585e-06	1.59655e-06	3.29377e-06	1.44868e-06	5.25735e-07	1.78321e-06	3.59935e-06	1.48825e-06	2.96607e-06	1.39598e-06	5.01643e-06	5.02757e-06	1.55046e-06
Sebacinales	2.8038e-07	2.34709e-06	1.87488e-06	3.48118e-07	1.09884e-06	1.69017e-06	1.32609e-06	1.97866e-06	1.16397e-06	1.59104e-06	2.15887e-06	1.0944e-06	1.99257e-06	1.93844e-06	6.24584e-07	8.98994e-07	1.23257e-06	2.09745e-06	2.04775e-06	2.76594e-06	2.5643e-06	2.07501e-06	2.68828e-06	2.47053e-06
Sedimentisphaerales	1.20862e-05	1.49616e-05	1.4146e-05	1.62634e-05	1.43749e-05	1.59329e-05	1.35095e-05	1.44004e-05	1.19329e-05	1.4092e-05	1.25955e-05	1.34869e-05	1.75447e-05	1.47947e-05	1.54851e-05	1.73165e-05	6.69111e-06	1.00614e-05	7.63256e-06	8.22834e-06	8.71091e-06	8.37327e-06	7.80648e-06	8.68495e-06
Selenomonadales	3.70629e-05	4.6804e-05	5.00845e-05	5.13067e-05	4.12583e-05	4.50671e-05	4.41712e-05	4.48184e-05	4.50863e-05	4.27754e-05	4.43183e-05	4.42373e-05	4.19019e-05	4.00404e-05	4.16523e-05	4.11663e-05	4.49218e-05	3.98846e-05	3.71161e-05	3.39172e-05	4.58833e-05	3.88192e-05	3.83953e-05	4.53255e-05
Silvanigrellales	2.60344e-06	5.18878e-06	5.41698e-06	4.11381e-06	2.88277e-06	4.51569e-06	3.47275e-06	5.53764e-06	1.94254e-06	4.03995e-06	2.98476e-06	4.10011e-06	6.19369e-06	4.47042e-06	7.12169e-06	5.31085e-06	1.12774e-06	3.90534e-07	3.10079e-06	2.77641e-06	2.56834e-06	3.62675e-06	3.81559e-06	2.27797e-06
Sneathiellales	5.77288e-05	6.60636e-05	5.08549e-05	6.6171e-05	4.53978e-05	4.66966e-05	5.25987e-05	4.29149e-05	4.19738e-05	4.58535e-05	6.08348e-05	5.11177e-05	5.32279e-05	4.68344e-05	4.61866e-05	5.12234e-05	5.9233e-05	8.09736e-05	6.56606e-05	5.54582e-05	4.47515e-05	3.83867e-05	4.59599e-05	4.89698e-05
Solirubrobacterales	0.00146068	0.00155827	0.00158101	0.00152593	0.00227497	0.00217942	0.0021775	0.00224494	0.00276259	0.00262826	0.00269023	0.00266752	0.00266786	0.00233819	0.0029739	0.00275828	0.00367766	0.00318248	0.00337853	0.00367095	0.00348718	0.00437407	0.00398363	0.00420102
Sordariales	4.09716e-06	4.59715e-06	3.72899e-06	5.23989e-06	6.3171e-06	4.61976e-06	3.06787e-05	5.82992e-06	6.07529e-06	5.11351e-06	8.31987e-06	2.29434e-06	3.17893e-06	4.48132e-06	2.25508e-06	6.0287e-06	2.00523e-06	5.51455e-06	5.45875e-06	3.32215e-06	3.29306e-06	3.12316e-06	2.41896e-06	3.82133e-06
Sphaerobacterales	0.000219945	0.000289559	0.000202982	0.000278252	0.000276762	0.00026787	0.000276154	0.000267106	0.000203169	0.000248051	0.000198688	0.000236562	0.00028979	0.000341827	0.000293356	0.000280324	0.000156048	0.000158125	0.000171486	0.000198309	0.00019021	0.00027641	0.000240283	0.000190431
Sphingobacteriales	0.00243665	0.00314849	0.00343936	0.00250499	0.00312727	0.00311271	0.00339235	0.00329395	0.00272652	0.00327308	0.00263391	0.00331615	0.00366792	0.00472704	0.00322228	0.00363787	0.0037103	0.00359692	0.00385657	0.00517223	0.00334281	0.00489211	0.00411127	0.00339978
Sphingomonadales	0.0542214	0.0457021	0.0536428	0.0540195	0.0713928	0.0737216	0.0755287	0.0703537	0.0632361	0.049991	0.0511508	0.0482405	0.0477003	0.0471336	0.0489244	0.0457227	0.0566508	0.0579731	0.0548467	0.0546673	0.0610363	0.0482965	0.0527127	0.066346
Spirochaetales	5.45871e-05	6.99775e-05	7.37924e-05	7.78468e-05	6.25144e-05	6.46461e-05	6.6158e-05	5.4765e-05	6.83328e-05	6.61778e-05	7.87116e-05	6.94023e-05	7.29763e-05	6.11496e-05	7.9131e-05	7.16293e-05	6.65366e-05	7.84042e-05	7.01651e-05	5.62486e-05	6.68742e-05	5.58187e-05	6.18766e-05	6.76312e-05
Spirulinales	2.08692e-05	1.85997e-05	2.22303e-05	1.96581e-05	1.9426e-05	2.127e-05	1.55051e-05	1.8206e-05	2.02137e-05	2.03041e-05	2.04519e-05	2.14451e-05	1.93651e-05	1.76478e-05	2.03245e-05	2.37014e-05	2.20187e-05	2.10131e-05	1.93523e-05	1.68444e-05	1.94641e-05	1.40218e-05	1.85408e-05	1.66201e-05
Spizellomycetales	1.85901e-06	9.01427e-07	3.64066e-06	2.01812e-06	3.60882e-06	2.40422e-06	1.85882e-06	1.34675e-05	5.93118e-06	9.90654e-06	3.32836e-06	1.26287e-05	8.27407e-06	2.11737e-05	4.68495e-06	6.31506e-06	8.88639e-06	1.26038e-05	1.43754e-05	2.2353e-05	6.18688e-06	3.92842e-05	2.71137e-05	1.15608e-05
Sporichthyales	0.000141256	0.000188778	0.00014953	0.000155541	0.000266278	0.000262205	0.000288451	0.000269182	0.000185331	0.000188232	0.000176982	0.000172053	0.000166361	0.000188448	0.000165228	0.000165151	0.000235181	0.000268724	0.000270915	0.000227003	0.000142852	0.000161991	0.000147984	0.000229056
Sporidiobolales	4.37861e-07	1.37895e-06	2.83211e-06	8.32758e-07	4.14087e-07	6.73785e-07	8.59454e-07	9.75601e-07	8.46802e-07	1.50387e-06	1.62828e-07	2.24012e-06	9.96695e-07	2.02673e-06	1.16193e-06	8.50093e-07	5.62608e-07	1.69664e-06	2.64331e-06	2.15743e-06	2.00697e-06	7.48599e-06	4.39482e-06	1.36797e-06
Streptomycetales	0.00244561	0.00285112	0.0034315	0.00259268	0.00421816	0.00482409	0.00495228	0.00463174	0.00324815	0.00913469	0.003808	0.00662073	0.00290984	0.00448143	0.00269733	0.00336209	0.00399294	0.00637079	0.0044285	0.00863586	0.0064989	0.00345818	0.0054909	0.00468643
Streptosporangiales	0.00186542	0.00233859	0.00227038	0.00223751	0.00291712	0.00314672	0.00311302	0.00321192	0.00316032	0.00254184	0.00283951	0.00260289	0.00202972	0.00211287	0.00195586	0.00224753	0.00155113	0.00177635	0.00149515	0.0013398	0.00156247	0.00113651	0.00217653	0.00142541
Sulfolobales	9.00818e-07	6.76432e-07	1.41734e-06	1.27485e-06	8.94272e-07	5.50615e-07	4.44114e-07	5.92065e-07	7.22429e-07	1.65754e-06	2.11663e-06	2.72078e-06	1.31912e-06	8.98676e-07	1.78537e-06	6.74975e-07	4.59589e-07	7.10185e-07	1.75804e-06	7.26588e-07	7.9884e-07	7.69694e-07	1.72089e-06	4.78088e-07
Synchytriales	1.21172e-06	2.95468e-06	2.2762e-06	5.83187e-07	3.32863e-06	2.4231e-06	7.29286e-07	2.98626e-06	6.89591e-06	5.28671e-06	1.3625e-06	5.40125e-06	2.99375e-06	1.43132e-05	2.27922e-06	4.40734e-06	8.48776e-06	5.5187e-06	9.71525e-06	1.52894e-05	4.0767e-06	2.47003e-05	1.55975e-05	7.3271e-06
Synechococcales	0.000683932	0.000687106	0.000708727	0.000728152	0.000676454	0.000710809	0.000723343	0.000658017	0.000673529	0.000663389	0.000747408	0.000691021	0.000672529	0.00063836	0.000732021	0.00065431	0.000665603	0.000640313	0.000637607	0.000616023	0.000737735	0.000613413	0.000641331	0.000669014
Synergistales	2.16945e-05	2.0642e-05	2.48068e-05	2.16988e-05	2.18524e-05	1.96343e-05	2.30037e-05	2.01165e-05	1.94157e-05	1.95741e-05	2.46592e-05	2.19701e-05	1.987e-05	2.11064e-05	1.829e-05	2.31758e-05	2.05312e-05	2.29638e-05	1.73953e-05	1.75291e-05	2.07872e-05	1.37582e-05	1.78791e-05	2.3093e-05
Syntrophobacterales	0.000412694	0.000421202	0.000421707	0.000447279	0.000412984	0.000390798	0.000423994	0.000401763	0.000377248	0.000383054	0.0004387	0.000411305	0.000410465	0.000358204	0.000418388	0.000420381	0.00038041	0.000351407	0.000394561	0.000343065	0.000403234	0.000307671	0.000339549	0.000379472
Taphrinales	0	0	0	2.80368e-07	3.37196e-07	0	2.86418e-07	5.42436e-07	1.50833e-07	4.16545e-07	0	4.87893e-07	2.62653e-07	7.20987e-07	6.59315e-08	4.56411e-07	7.29952e-07	1.21329e-07	3.74503e-07	1.66429e-06	3.85562e-07	4.02169e-06	1.72775e-06	2.88016e-07
Tepidiformales	3.46314e-05	4.35422e-05	4.16212e-05	2.66098e-05	2.3882e-05	2.37702e-05	2.1857e-05	2.14002e-05	5.16014e-05	4.91349e-05	5.69382e-05	5.90236e-05	5.72322e-05	5.18905e-05	7.09734e-05	5.72666e-05	2.94562e-05	2.78142e-05	2.28968e-05	2.93867e-05	4.69633e-05	3.64584e-05	4.83448e-05	3.96566e-05
Terrimicrobiales	1.1675e-05	2.2304e-05	1.07487e-05	1.84947e-05	1.92806e-05	1.92395e-05	1.917e-05	1.81789e-05	1.42088e-05	1.34982e-05	1.21838e-05	1.49995e-05	1.24329e-05	1.1217e-05	1.43875e-05	1.41265e-05	1.59292e-05	1.95201e-05	1.31515e-05	1.1728e-05	1.09378e-05	8.31996e-06	1.05005e-05	1.05622e-05
Thelephorales	0	0	0	0	0	0	0	0	0	0	8.70548e-07	0	0	0	0	0	0	0	0	0	0	0	0	0
Thermales	0.000172852	0.000172286	0.000169887	0.000174657	0.000175592	0.000164933	0.000165	0.000152895	0.00015614	0.000161904	0.000172778	0.000160482	0.000162884	0.000152215	0.000173034	0.000166067	0.000143519	0.000139669	0.000133808	0.000141409	0.000159944	0.000125573	0.000153581	0.000152229
Thermoanaerobacterales	8.96794e-05	8.8996e-05	0.000112749	8.54301e-05	0.000124821	0.00010007	7.85365e-05	0.000177572	0.000211026	0.000316677	0.000143348	0.000362513	0.000233084	0.000645704	0.000194461	0.000222008	0.000320339	0.000383911	0.000434961	0.000653816	0.000200212	0.000971746	0.000656992	0.000292797
Thermoanaerobaculales	1.50659e-05	2.25918e-05	2.52431e-05	2.0525e-05	2.00446e-05	2.0731e-05	2.12633e-05	1.98247e-05	2.59128e-05	2.6717e-05	2.50983e-05	2.74682e-05	2.23291e-05	1.82125e-05	2.77315e-05	2.21354e-05	2.26904e-05	2.89621e-05	2.25488e-05	2.12042e-05	1.93871e-05	2.1697e-05	1.8681e-05	2.70426e-05
Thermococcales	1.15609e-05	1.03001e-05	9.41315e-06	1.17511e-05	1.36451e-05	1.31043e-05	1.14231e-05	1.23535e-05	9.83916e-06	1.37436e-05	1.38373e-05	1.19763e-05	1.0873e-05	9.85034e-06	1.02725e-05	1.38526e-05	1.1036e-05	9.5022e-06	1.26497e-05	8.34377e-06	1.19722e-05	1.26287e-05	1.2553e-05	1.52719e-05
Thermodesulfobacteriales	2.5814e-05	2.67176e-05	2.65085e-05	2.90163e-05	3.39774e-05	3.19255e-05	3.04084e-05	2.70696e-05	2.03356e-05	2.27638e-05	2.31203e-05	2.00535e-05	2.96805e-05	2.27249e-05	2.37735e-05	2.42065e-05	1.75075e-05	1.97128e-05	2.26142e-05	1.58243e-05	2.0533e-05	1.92065e-05	1.71519e-05	2.00489e-05
Thermoflexales	8.68596e-06	8.32475e-06	8.63754e-06	6.20216e-06	8.80339e-06	6.96936e-06	6.16142e-06	8.01346e-06	6.16554e-06	8.07535e-06	9.06441e-06	5.5068e-06	7.71017e-06	9.03607e-06	7.06948e-06	7.69721e-06	5.64244e-06	6.45902e-06	2.92865e-06	3.68877e-06	4.58218e-06	5.62193e-06	4.11257e-06	8.17512e-06
Thermogemmatisporales	0.000355562	0.000539583	0.000227648	0.000517926	0.000517215	0.000524384	0.000595705	0.000521967	0.000203334	0.000282629	0.000216144	0.000222881	0.000466936	0.000444874	0.000444069	0.000464391	6.11077e-05	4.72387e-05	4.42813e-05	5.45328e-05	0.000113999	6.36508e-05	0.000104399	0.000100129
Thermoleophilales	0.000275844	0.000303286	0.000320087	0.000304955	0.000389964	0.00037674	0.000386736	0.000397114	0.000470598	0.000452186	0.000486185	0.000471226	0.000425738	0.000398882	0.000458973	0.00041979	0.000597312	0.000536192	0.00126961	0.00063508	0.000556406	0.000533178	0.000506402	0.000548661
Thermomicrobiales	0.00026959	0.000417883	0.000285958	0.000357954	0.000293817	0.000295712	0.000302345	0.00029265	0.000296498	0.000312002	0.000310087	0.000323649	0.000406184	0.000394162	0.000361312	0.000366702	0.000273294	0.000258448	0.000279213	0.000254324	0.000266844	0.000231622	0.000240063	0.000284981
Thermoplasmatales	1.2287e-05	1.3075e-05	6.50316e-06	1.74207e-05	1.51254e-05	1.31126e-05	1.22129e-05	1.11318e-05	1.35519e-05	1.56054e-05	1.41618e-05	1.09208e-05	1.45302e-05	1.13138e-05	1.85811e-05	1.68612e-05	7.86693e-06	9.51471e-06	8.68215e-06	9.33817e-06	9.17033e-06	9.67867e-06	1.07027e-05	8.64427e-06
Thermoproteales	2.77646e-06	3.21068e-06	2.21542e-06	4.57302e-06	3.71858e-06	1.71044e-06	3.73008e-06	1.92314e-06	3.4779e-06	3.19018e-06	2.24608e-06	2.58234e-06	2.52554e-06	3.10251e-06	3.59144e-06	6.20427e-06	1.67875e-06	7.7458e-07	3.5338e-06	2.55175e-06	2.46528e-06	2.29145e-06	2.37274e-06	3.85991e-06
Thermotogales	1.5173e-05	2.0028e-05	1.89722e-05	1.85798e-05	1.85773e-05	1.5494e-05	1.74819e-05	1.39863e-05	1.74413e-05	1.81499e-05	2.16156e-05	1.82392e-05	1.61352e-05	1.34049e-05	1.44058e-05	1.51855e-05	1.60016e-05	1.77138e-05	1.45512e-05	1.32412e-05	1.19634e-05	1.18236e-05	1.47925e-05	1.43893e-05
Thiotrichales	0.000237643	0.000251071	0.000252407	0.00027743	0.000219529	0.000216287	0.000238092	0.000235498	0.000262094	0.000270791	0.000270768	0.000258635	0.000266789	0.000221943	0.000265884	0.000246425	0.000251858	0.000264863	0.000239406	0.000245953	0.000274415	0.00020837	0.000238505	0.000261957
Tilletiales	1.58103e-06	4.21591e-06	3.30179e-06	2.49493e-06	5.39328e-06	1.80439e-06	2.20216e-06	8.51716e-06	1.07908e-05	1.3853e-05	4.27978e-06	1.58233e-05	8.41096e-06	2.39034e-05	7.54077e-06	8.34134e-06	2.00809e-05	1.64464e-05	1.95708e-05	3.05951e-05	7.32597e-06	3.93777e-05	3.25906e-05	1.50561e-05
Tissierellales	7.68912e-06	1.19925e-05	9.33999e-06	1.2088e-05	6.74607e-06	8.15226e-06	5.00365e-06	9.40787e-06	1.70874e-05	1.8867e-05	9.86348e-06	1.84394e-05	1.76542e-05	3.44975e-05	1.3555e-05	1.65053e-05	1.91878e-05	2.52091e-05	2.51059e-05	3.68522e-05	1.19762e-05	6.98883e-05	3.7557e-05	1.78102e-05
Togniniales	0	0	9.55928e-08	1.01843e-07	1.74498e-07	0	1.30668e-06	9.45048e-07	4.93534e-07	9.99199e-08	2.27854e-06	5.50719e-07	2.8395e-07	2.21473e-07	9.2135e-08	0	0	0	4.38216e-07	1.30775e-06	1.13139e-07	0	4.94607e-07	3.94543e-07
Trechisporales	5.33902e-07	2.02257e-07	0	1.6717e-06	0	0	0	4.0355e-07	7.7769e-08	1.11339e-07	3.2933e-07	3.86465e-07	4.57555e-07	1.10497e-06	2.17774e-07	8.68549e-08	5.12888e-07	1.61194e-07	1.37695e-06	2.00303e-06	1.91575e-07	4.16248e-07	1.46785e-06	5.32232e-07
Tremellales	0.000653763	0.000655128	0.000561374	0.000606823	0.000616405	0.000622846	0.000567939	0.000648288	0.000672993	0.000735518	0.00064937	0.000616092	0.000717729	0.000652377	0.000595251	0.000728649	5.62023e-06	7.24705e-06	7.73085e-06	1.17302e-05	5.19376e-06	1.97558e-05	1.08964e-05	7.59555e-06
Trichosporonales	1.58663e-06	1.00806e-06	1.53495e-06	3.68043e-07	1.58821e-06	8.34953e-07	3.87205e-07	2.62378e-06	3.13498e-06	5.75222e-06	1.6381e-06	5.97491e-06	3.50713e-06	1.01408e-05	2.87623e-06	4.95572e-06	5.83515e-06	6.25816e-06	6.86515e-06	1.23929e-05	2.6777e-06	1.55409e-05	1.04871e-05	4.4368e-06
Trueperales	3.45316e-05	3.94936e-05	4.43232e-05	3.72807e-05	3.92261e-05	3.31917e-05	3.68471e-05	3.49661e-05	4.32847e-05	3.99585e-05	4.69126e-05	4.07704e-05	4.21152e-05	4.19248e-05	4.80786e-05	4.10054e-05	4.07722e-05	3.46581e-05	3.99867e-05	3.66324e-05	3.11334e-05	3.36433e-05	3.59906e-05	3.69716e-05
Trypetheliales	0	6.36131e-07	0	5.26076e-08	1.09765e-07	7.51256e-08	2.51529e-07	1.07047e-06	5.09876e-08	8.65972e-08	0	2.161e-07	1.66927e-07	6.17013e-07	1.13462e-07	7.34896e-08	0	0	1.25495e-07	2.32463e-07	0	2.7849e-07	0	2.13345e-07
Umbilicariales	1.12054e-07	4.99455e-07	8.07936e-07	2.94213e-07	0	0	1.41162e-06	3.71419e-08	3.81145e-08	0	2.89869e-07	4.52159e-07	8.16074e-07	3.94968e-07	2.66168e-07	5.93286e-07	2.49729e-07	9.27417e-07	6.18879e-07	5.73196e-07	6.0444e-07	6.63116e-07	2.21939e-07	4.86104e-07
Ustilaginales	1.59927e-06	1.61387e-06	5.18825e-07	2.25408e-06	3.13149e-06	1.56188e-06	2.24625e-06	3.76865e-06	4.02984e-06	5.01379e-06	2.58245e-06	5.57823e-06	2.66554e-06	1.34716e-05	1.83464e-06	2.64474e-06	4.91617e-06	6.5496e-06	5.08029e-06	1.05778e-05	2.47619e-06	1.96104e-05	8.97594e-06	3.10307e-06
Vampirovibrionales	2.75605e-06	4.33431e-06	2.41972e-06	2.87355e-06	1.86894e-06	3.40992e-06	2.73459e-06	5.03666e-06	5.83098e-06	2.36902e-06	3.22171e-06	2.66647e-05	1.9679e-06	3.58031e-06	3.51899e-06	3.3604e-06	5.38077e-06	5.61759e-06	2.75448e-06	4.81819e-06	3.80264e-06	2.88695e-06	2.49408e-06	2.8164e-06
Veillonellales	1.45581e-05	1.8572e-05	1.60214e-05	1.74878e-05	1.54632e-05	1.80889e-05	1.65762e-05	1.7402e-05	1.54756e-05	1.60824e-05	1.43518e-05	1.38965e-05	1.8915e-05	1.68286e-05	1.62356e-05	1.58815e-05	1.37955e-05	7.66512e-06	1.11689e-05	1.05532e-05	1.64059e-05	9.35409e-06	9.97732e-06	1.58147e-05
Venturiales	7.84018e-07	1.26224e-06	1.83146e-06	1.00841e-06	1.47625e-06	2.31458e-06	2.14241e-06	1.47942e-06	1.22862e-06	1.53024e-06	1.12806e-06	8.49178e-07	1.29705e-07	1.89171e-06	1.28717e-06	1.20505e-06	7.5605e-07	1.71604e-06	5.50416e-07	2.8102e-06	9.91553e-08	6.88043e-07	6.86606e-07	4.52758e-07
Verrucariales	8.01327e-07	1.04477e-07	4.53382e-07	5.95153e-07	4.60014e-07	2.96845e-07	0	9.02163e-07	2.0395e-07	3.21237e-07	4.99112e-08	3.07789e-07	1.9412e-07	8.77408e-07	4.75929e-08	4.3485e-07	0	2.9308e-07	9.45773e-07	1.0827e-06	0	1.9918e-07	2.27055e-07	0
Verrucomicrobiales	0.00745321	0.00932661	0.00798771	0.00936338	0.00796967	0.00764348	0.00642811	0.00745092	0.00602247	0.00633012	0.00635818	0.0062457	0.00655052	0.0061045	0.00668144	0.00795114	0.0060985	0.00593914	0.00579036	0.00534403	0.0048102	0.00375962	0.00392297	0.00455607
Vibrionales	0.000115556	9.65315e-05	0.000154494	0.00010467	0.000146912	0.000114598	0.000101082	0.000215568	0.000311765	0.000408247	0.000173266	0.000453105	0.000301103	0.000762821	0.000246399	0.000284849	0.00041949	0.000526971	0.000599722	0.000842066	0.000258524	0.00125996	0.000831915	0.000366538
Victivallales	3.50236e-06	4.54436e-06	5.85433e-06	7.13931e-06	4.44339e-06	5.26329e-06	3.67778e-06	3.95379e-06	4.64039e-06	3.84432e-06	4.61327e-06	5.9192e-06	3.82646e-06	3.13809e-06	4.09128e-06	2.96442e-06	1.62535e-06	1.62057e-06	2.3403e-06	2.32086e-06	4.01342e-06	7.70222e-07	1.46507e-06	3.841e-06
Violaceomycetales	0	0	0	0	0	0	0	0	0	4.39085e-07	0	0	0	0	2.69495e-07	0	0	0	0	0	0	2.08867e-07	0	0
Wallemiales	2.55808e-06	1.95014e-06	1.58939e-06	2.03615e-06	3.25833e-06	2.62383e-06	2.18214e-06	2.61102e-06	1.7861e-06	3.26307e-06	2.12295e-06	2.60077e-06	2.45414e-06	3.76075e-06	1.93237e-06	2.1806e-06	8.21533e-07	2.34702e-06	1.73691e-06	2.5056e-06	1.12793e-06	2.04594e-06	1.12276e-06	9.51583e-07
Xanthomonadales	0.013777	0.0183569	0.0174389	0.0192752	0.0191998	0.0168594	0.0178877	0.0163216	0.0118444	0.0124499	0.0106178	0.0116568	0.017676	0.0209679	0.0203858	0.0177429	0.0100426	0.0112778	0.0100664	0.0101164	0.0148249	0.0108729	0.0135741	0.0145049
Xylariales	3.34766e-06	2.12284e-06	3.8293e-06	4.596e-06	4.68549e-06	4.18893e-06	8.84005e-06	7.68897e-06	6.99744e-06	6.11383e-06	1.28301e-05	7.05049e-06	5.69493e-06	8.48556e-06	4.31642e-06	7.85643e-06	5.14997e-06	6.97464e-06	8.64128e-06	9.19797e-06	4.49033e-06	8.86791e-06	6.88746e-06	7.06473e-06
Zoopagales	7.28542e-07	2.44604e-06	1.13057e-06	2.28791e-06	1.95038e-06	2.57222e-07	4.86939e-07	3.58751e-06	2.81166e-06	4.69077e-06	1.14367e-06	5.47033e-06	3.35044e-06	7.05859e-06	2.77333e-06	3.38149e-06	5.07872e-06	5.87262e-06	9.68373e-06	7.10904e-06	2.27738e-06	1.96072e-05	9.55748e-06	2.00758e-06
unclassified	0.543194	0.499762	0.501639	0.522607	0.489525	0.487855	0.480102	0.454502	0.493554	0.508666	0.54017	0.512098	0.51026	0.44814	0.52102	0.510422	0.519245	0.486936	0.498915	0.459072	0.516266	0.42764	0.451596	0.497565
