# Supplementary material
Source: MDPI journal article supplement (https://www.mdpi.com/2073-4395/14/3/635)
Supplement: s1 [file s1 › Table S7.xlsx]

## Sheet: Sheet1
Table S7.	Relative species abundance of 24 samples at the family level
family	AIP1	AIP2	AIP3	AIP4	AMP1	AMP2	AMP3	AMP4	BIP1	BIP2	BIP3	BIP4	BMP1	BMP2	BMP3	BMP4	CIP1	CIP2	CIP3	CIP4	CMP1	CMP2	CMP3	CMP4
Abitibacteriaceae	2.26004e-05	2.69406e-05	2.91604e-05	3.37977e-05	3.91308e-05	3.41317e-05	3.88391e-05	2.59602e-05	2.28656e-05	2.46291e-05	2.54395e-05	2.423e-05	2.60124e-05	2.14731e-05	2.58134e-05	2.72463e-05	1.87773e-05	2.13817e-05	1.85146e-05	2.23879e-05	2.37734e-05	2.00087e-05	1.96391e-05	1.93745e-05
Acaryochloridaceae	3.34637e-05	3.31171e-05	3.46379e-05	3.24192e-05	3.25353e-05	2.82726e-05	2.78953e-05	3.16847e-05	3.17308e-05	3.16412e-05	3.39106e-05	3.23522e-05	3.35609e-05	3.33045e-05	3.64503e-05	2.93923e-05	3.47681e-05	3.80107e-05	3.05911e-05	2.34343e-05	3.67735e-05	2.27675e-05	3.03998e-05	3.42098e-05
Acetobacteraceae	0.00112439	0.00133353	0.00119276	0.00112729	0.00114381	0.00107969	0.00120249	0.00127919	0.00104154	0.00108838	0.00108755	0.00108718	0.00120065	0.00129452	0.00106747	0.00114907	0.00121053	0.0013027	0.00121195	0.00122014	0.000980781	0.00123963	0.00118908	0.00107846
Acholeplasmataceae	1.49252e-06	2.74122e-06	3.15914e-06	2.16157e-06	2.97808e-06	2.56977e-06	3.52416e-06	1.94741e-06	2.64136e-06	2.89532e-06	3.51948e-06	2.24408e-06	4.26561e-06	3.21583e-06	2.47117e-06	3.46364e-06	4.37364e-06	6.16856e-06	4.61127e-06	2.87375e-06	2.94582e-06	3.64501e-06	4.41499e-06	3.89321e-06
Acidaminococcaceae	5.04428e-06	4.28744e-06	3.9693e-06	6.62298e-06	5.85285e-06	6.62541e-06	4.41015e-06	5.52589e-06	7.38516e-06	3.81839e-06	5.1008e-06	5.12781e-06	6.22961e-06	6.0314e-06	4.56205e-06	4.61349e-06	4.8655e-06	5.39242e-06	4.18418e-06	4.02713e-06	4.76587e-06	4.70938e-06	4.45543e-06	6.1537e-06
Acidiferrobacteraceae	0.000133759	0.000122695	0.00012037	0.000125618	0.000114582	0.000115292	0.000114268	0.000112629	0.000150429	0.000146517	0.000138445	0.000131788	0.000134668	0.000108158	0.000126889	0.000135211	0.000142708	0.000139982	0.000154431	0.000162418	0.000117857	0.000102998	0.000108946	0.000125617
Acidilobaceae	3.35535e-07	4.72756e-07	0	3.97188e-07	0	1.35403e-07	3.02663e-07	9.37834e-08	2.88717e-07	5.43818e-07	2.24973e-07	1.82756e-07	8.75511e-08	9.30388e-08	4.92228e-07	2.99828e-07	3.0339e-07	8.81619e-07	4.64159e-07	0	1.20888e-07	2.28896e-07	8.29497e-07	0
Acidimicrobiaceae	0.000618345	0.000578942	0.000607401	0.000703555	0.000837838	0.000849357	0.000838184	0.000782839	0.000794873	0.000823425	0.000768151	0.000780364	0.00070522	0.000679378	0.000757652	0.000678571	0.00114993	0.00108347	0.00122963	0.00104278	0.000664833	0.000572495	0.000594716	0.00069584
Acidithiobacillaceae	3.33788e-05	3.39603e-05	3.02552e-05	3.41579e-05	3.59389e-05	3.67379e-05	3.46723e-05	3.94399e-05	3.17202e-05	2.86574e-05	3.46431e-05	3.04667e-05	3.04868e-05	2.98415e-05	3.07107e-05	2.68802e-05	2.80922e-05	2.91947e-05	3.82663e-05	2.90772e-05	2.80373e-05	2.12229e-05	2.76628e-05	2.43006e-05
Acidobacteriaceae	0.00768714	0.0131902	0.0094409	0.00844758	0.0137701	0.0144544	0.0137278	0.0189708	0.00413671	0.00429647	0.00390707	0.00425645	0.00731941	0.00705417	0.00628228	0.00866674	0.00404515	0.00405933	0.00453698	0.00411188	0.00336206	0.00296467	0.00344303	0.00375277
Acidothermaceae	4.04894e-05	7.6432e-05	4.76035e-05	7.02692e-05	0.000151801	0.000157981	0.000170967	0.000157807	3.85283e-05	4.47608e-05	3.19084e-05	3.39094e-05	4.12932e-05	6.25566e-05	4.75915e-05	4.95871e-05	2.62668e-05	2.77948e-05	2.48138e-05	2.24783e-05	2.81396e-05	2.58982e-05	2.50458e-05	2.48077e-05
Ackermannviridae	1.24415e-07	1.74688e-07	7.96039e-08	2.54426e-07	4.35934e-07	1.12007e-07	1.94242e-07	1.66287e-07	5.47981e-08	5.54715e-08	4.61098e-07	3.77769e-07	7.14415e-07	1.8972e-07	2.33559e-07	1.59221e-07	6.93197e-08	5.05235e-07	0	0	0	2.9732e-08	3.08029e-08	1.36663e-07
Acrospermaceae	1.07903e-07	0	1.08061e-07	0	5.16867e-07	1.11854e-07	5.6503e-07	4.00142e-07	1.99115e-07	0	0	8.61207e-08	0	0	5.46163e-07	1.84704e-07	0	2.91817e-07	0	0	1.14608e-07	8.34604e-07	0	8.27633e-08
Actinomycetaceae	5.88187e-05	5.45312e-05	5.72078e-05	6.57415e-05	6.88359e-05	7.23232e-05	7.73757e-05	7.14905e-05	7.35658e-05	7.79425e-05	6.77394e-05	7.50916e-05	6.58907e-05	6.17217e-05	6.23273e-05	6.12415e-05	7.97428e-05	8.80666e-05	8.89795e-05	8.51621e-05	6.45877e-05	5.23849e-05	5.45408e-05	6.49819e-05
Actinopolysporaceae	7.27037e-06	9.81465e-06	9.94027e-06	9.51941e-06	1.13462e-05	1.70894e-05	1.61805e-05	1.58161e-05	1.35963e-05	1.30484e-05	1.80501e-05	1.09325e-05	1.22894e-05	1.33487e-05	1.32569e-05	1.26628e-05	7.91275e-06	9.99421e-06	7.48812e-06	8.19417e-06	9.396e-06	6.84572e-06	7.82376e-06	8.3686e-06
Actinospicaceae	2.23524e-05	3.67111e-05	4.75921e-05	2.60028e-05	5.95241e-05	4.79594e-05	4.65871e-05	7.27322e-05	2.37227e-05	2.48987e-05	3.14307e-05	2.23291e-05	2.56984e-05	4.14321e-05	2.55995e-05	6.35733e-05	3.46966e-05	5.40081e-05	3.29143e-05	4.73941e-05	1.98436e-05	1.66884e-05	4.02956e-05	3.65684e-05
Acuticoccaceae	2.57522e-05	2.15607e-05	2.76102e-05	2.72334e-05	1.54035e-05	1.85825e-05	1.75226e-05	1.57182e-05	2.32675e-05	2.36054e-05	3.21315e-05	2.43604e-05	2.57041e-05	1.8262e-05	2.96791e-05	2.17392e-05	3.43656e-05	3.26745e-05	3.72902e-05	3.01199e-05	2.43626e-05	2.22211e-05	2.42567e-05	2.55304e-05
Adintoviridae	2.09703e-06	1.70146e-05	1.33491e-05	4.56799e-06	6.78946e-06	4.80724e-06	1.46906e-06	2.30283e-06	8.73678e-06	5.4757e-06	4.21276e-06	1.46712e-05	1.08705e-06	1.12827e-06	6.87182e-07	2.0389e-06	2.07184e-06	0	8.65956e-07	2.2147e-06	2.25173e-05	6.44695e-07	8.62282e-07	2.40159e-07
Aerococcaceae	1.12283e-05	1.60974e-05	1.64454e-05	1.16102e-05	2.62616e-05	1.30462e-05	1.02338e-05	1.54616e-05	1.84688e-05	2.24628e-05	9.02722e-06	1.19157e-05	1.39824e-05	2.13361e-05	1.07148e-05	1.42638e-05	1.27909e-05	3.50347e-05	1.84203e-05	1.64957e-05	1.26444e-05	1.77311e-05	1.47802e-05	1.43101e-05
Aeromonadaceae	0.000110071	0.000207095	0.000254136	4.32825e-05	7.29634e-05	5.03613e-05	4.61746e-05	6.89272e-05	0.000162361	0.000200659	6.29547e-05	0.000103148	5.92605e-05	7.53359e-05	5.75487e-05	5.4947e-05	6.36386e-05	0.000123143	6.35561e-05	8.06931e-05	6.20743e-05	9.13478e-05	8.15861e-05	5.85699e-05
Aestuariivirgaceae	1.26705e-05	1.83788e-05	1.47398e-05	1.46414e-05	1.3254e-05	1.3073e-05	1.6151e-05	1.41026e-05	1.50242e-05	1.54324e-05	1.94662e-05	1.16743e-05	1.62604e-05	1.27524e-05	1.15349e-05	1.41613e-05	2.40243e-05	1.96189e-05	1.8825e-05	2.01965e-05	9.78071e-06	1.07166e-05	1.24422e-05	1.89779e-05
Agaricaceae	3.64388e-07	6.2573e-07	7.55875e-07	3.19455e-06	8.88908e-07	1.05929e-06	2.04136e-07	1.37211e-06	1.75896e-06	2.63957e-06	3.1981e-06	3.03743e-06	2.31105e-06	6.21031e-06	1.09301e-06	2.21844e-06	3.27577e-06	3.37184e-06	3.93014e-06	6.17997e-06	1.08759e-06	9.15794e-06	8.40176e-06	1.67718e-06
Ajellomycetaceae	5.68635e-07	3.77121e-07	4.06004e-07	6.03514e-07	6.53894e-07	7.95666e-08	1.06349e-06	4.42717e-07	7.40301e-08	1.0948e-06	1.14769e-06	4.95227e-07	3.47919e-07	1.39554e-06	8.04109e-07	1.10853e-06	1.13962e-06	7.01431e-07	6.93724e-07	1.9531e-06	1.67823e-06	1.61868e-06	1.5856e-06	2.90262e-07
Akkermansiaceae	3.92768e-05	3.72856e-05	4.02863e-05	3.84912e-05	3.22167e-05	3.09906e-05	2.93009e-05	3.10823e-05	4.51392e-05	4.0206e-05	5.41636e-05	4.06826e-05	4.171e-05	3.24901e-05	4.09792e-05	4.27294e-05	4.85654e-05	4.78865e-05	4.23884e-05	4.45976e-05	3.99635e-05	2.91255e-05	3.33064e-05	3.77585e-05
Alcaligenaceae	0.00144316	0.00140893	0.00149968	0.00148099	0.00133148	0.00131157	0.00135607	0.00134214	0.00143614	0.00115612	0.00132427	0.00120892	0.00123483	0.00102894	0.00126585	0.00113068	0.00125646	0.0013499	0.00122299	0.00125871	0.00145773	0.00115071	0.00138598	0.00153273
Alcanivoracaceae	9.43205e-05	0.00010376	8.09146e-05	0.000120091	9.67659e-05	9.93009e-05	0.000108358	0.000103256	7.98604e-05	8.70559e-05	7.60878e-05	8.36049e-05	0.000108595	0.000127334	0.00013334	0.000105894	5.83162e-05	6.96954e-05	6.21302e-05	6.47373e-05	7.53847e-05	7.1094e-05	7.70044e-05	7.92851e-05
Algiphilaceae	1.16051e-05	8.42043e-06	8.70348e-06	8.87193e-06	5.50873e-06	5.4674e-06	6.17198e-06	5.13624e-06	1.24222e-05	1.49565e-05	1.75088e-05	1.61058e-05	1.67894e-05	6.29906e-06	1.48703e-05	9.783e-06	1.49807e-05	1.04264e-05	1.30438e-05	9.61923e-06	7.37559e-06	5.86503e-06	6.02811e-06	7.64044e-06
Alicyclobacillaceae	9.42366e-05	0.000120256	9.2588e-05	0.000122028	0.000117088	0.0001179	0.000119154	0.000120239	9.19289e-05	9.0952e-05	0.000102739	9.23048e-05	0.000117088	0.000102953	0.000111868	0.000105569	8.18187e-05	7.86653e-05	7.7929e-05	7.73567e-05	7.90553e-05	7.43094e-05	6.67359e-05	9.42877e-05
Alteromonadaceae	0.000174715	0.000191958	0.000198311	0.000206188	0.00017606	0.000179328	0.000209699	0.000190732	0.000193117	0.000195901	0.000202182	0.000190319	0.000187256	0.00016569	0.000187086	0.000189101	0.000194538	0.000215699	0.000185536	0.000199462	0.000195565	0.000145866	0.000178258	0.000170116
Amanitaceae	1.61855e-07	1.12577e-06	6.90392e-08	1.35427e-06	3.03386e-07	1.57509e-07	0	5.63639e-07	2.96219e-07	1.1872e-06	9.66231e-08	1.55464e-06	7.97027e-07	1.78377e-06	7.26154e-07	8.46433e-07	1.3734e-06	1.75046e-06	1.39328e-06	2.34164e-06	2.19678e-06	4.27997e-06	2.92403e-06	6.66115e-07
Amniculicolaceae	1.28532e-07	0	9.09297e-08	0	0	0	0	1.10333e-07	0	7.04457e-07	2.11307e-07	4.20248e-08	1.03001e-07	2.07224e-07	8.76407e-08	7.32721e-07	9.21296e-07	0	0	5.86589e-07	0	0	0	0
Amoebophilaceae	1.22761e-06	2.08689e-06	1.81831e-06	1.69242e-06	3.46011e-07	2.08013e-06	1.51725e-06	1.2014e-06	1.63455e-06	8.68613e-07	8.38152e-07	2.16346e-06	1.09034e-06	1.29209e-06	1.57908e-06	1.30015e-06	1.2652e-06	9.34746e-07	9.00016e-07	7.97498e-07	1.38236e-06	1.09345e-06	1.80541e-06	4.9277e-07
Amphiacanthidae	0	5.63431e-07	1.08061e-07	0	0	0	1.2228e-06	8.11099e-07	1.49983e-07	3.20291e-07	0	3.5946e-07	7.37273e-08	7.58022e-07	2.55448e-07	0	1.0252e-07	0	0	1.14263e-06	4.58432e-07	6.62168e-07	3.45347e-07	0
Amylocorticiaceae	3.72932e-07	4.15807e-07	4.21773e-07	0	7.08897e-08	0	1.93392e-07	1.64894e-07	1.60399e-07	9.28448e-07	5.8012e-07	5.39153e-07	2.18878e-07	1.70871e-07	4.04243e-07	5.89303e-07	5.23534e-07	6.48065e-07	4.96464e-07	8.98777e-07	6.67115e-07	1.8362e-07	6.54172e-07	0
Anaerohalosphaeraceae	7.06757e-06	7.24666e-06	7.18237e-06	8.01773e-06	9.40622e-06	8.83119e-06	9.24784e-06	8.32354e-06	6.88952e-06	5.98734e-06	6.74241e-06	7.46261e-06	9.22705e-06	9.75218e-06	9.39004e-06	9.37304e-06	3.2355e-06	5.48813e-06	4.60463e-06	5.91402e-06	3.16654e-06	3.8486e-06	3.54977e-06	5.02418e-06
Anaerolineaceae	0.00122554	0.00112169	0.00114941	0.00113038	0.000990243	0.00105064	0.000920391	0.00098206	0.00166235	0.0018162	0.00203802	0.00184649	0.00156401	0.00123434	0.00169325	0.00145226	0.0023325	0.00242392	0.002299	0.00211765	0.00171724	0.00140328	0.0014393	0.00173077
Anaeromyxobacteraceae	0.000431447	0.00054241	0.000464087	0.000517976	0.000523872	0.000488382	0.000537321	0.000481305	0.000352895	0.000338519	0.000332527	0.000357144	0.000525329	0.000475924	0.000558827	0.000523072	0.000278785	0.000286244	0.000229013	0.000228144	0.000293441	0.000239667	0.000314812	0.000299182
Anaeroplasmataceae	0	6.85916e-08	4.53858e-07	8.61379e-08	0	0	0	0	0	0	6.55356e-08	2.42636e-07	0	2.95297e-07	4.21881e-07	6.34418e-08	3.38762e-07	0	0	0	0	0	0	0
Anaplasmataceae	6.01777e-06	3.59284e-06	7.86392e-06	6.5238e-06	5.20489e-06	5.86461e-06	5.90191e-06	3.17066e-06	7.5636e-06	2.66388e-06	3.95401e-06	4.40641e-06	6.18976e-06	4.95325e-06	4.67436e-06	3.98354e-06	5.71396e-06	3.31309e-06	2.83983e-06	6.01797e-06	5.59828e-05	7.25097e-06	2.95761e-06	2.86804e-06
Ancalomicrobiaceae	1.50257e-05	1.3001e-05	1.28032e-05	1.32386e-05	1.5345e-05	1.07869e-05	1.4452e-05	1.07912e-05	1.06769e-05	9.4804e-06	1.67847e-05	9.92911e-06	1.15485e-05	9.5515e-06	9.28927e-06	1.52345e-05	1.79838e-05	1.55246e-05	1.47136e-05	9.9406e-06	6.5802e-06	8.16041e-06	1.17362e-05	1.05519e-05
Ancylistaceae	3.59318e-07	9.50365e-08	5.74623e-07	1.51068e-07	9.60577e-07	7.96278e-07	9.41368e-07	1.28004e-06	1.55535e-06	1.53159e-06	7.68543e-07	3.20046e-06	7.60365e-07	4.51826e-06	5.99643e-07	1.58237e-06	2.55654e-06	2.85339e-06	2.32822e-06	3.54727e-06	2.35125e-06	9.82425e-06	4.15941e-06	2.52677e-06
Anthracoideaceae	0	0	0	0	2.75895e-07	0	0	6.88318e-08	2.11903e-07	0	0	0	0	6.23104e-08	0	0	0	0	0	0	0	0	5.55865e-07	0
Aphanizomenonaceae	5.57571e-05	5.50362e-05	6.01864e-05	6.62384e-05	6.64007e-05	5.76666e-05	5.97419e-05	6.17978e-05	4.98823e-05	5.59851e-05	5.69174e-05	5.81477e-05	6.77622e-05	5.90751e-05	5.39058e-05	5.95869e-05	5.63445e-05	4.78131e-05	5.97232e-05	4.77197e-05	6.27424e-05	4.99567e-05	5.10936e-05	5.70032e-05
Aphanothecaceae	5.5129e-05	5.6589e-05	5.46639e-05	6.10104e-05	6.17812e-05	6.12665e-05	5.38728e-05	5.09677e-05	4.92891e-05	4.79113e-05	5.34783e-05	5.33093e-05	5.32087e-05	4.24374e-05	5.7078e-05	4.99083e-05	4.75713e-05	3.88497e-05	4.73395e-05	4.24584e-05	5.40343e-05	4.44451e-05	4.53218e-05	4.84744e-05
Apiosporaceae	0	0	1.84105e-07	0	0	7.56663e-08	0	0	3.10449e-07	0	0	6.839e-08	0	2.51549e-07	1.65218e-07	3.69345e-07	0	1.68412e-07	1.10731e-07	9.12132e-07	1.08948e-07	1.03144e-07	0	6.50591e-07
Aplosporellaceae	1.06821e-07	1.42781e-07	0	3.2096e-07	0	9.06353e-07	7.25797e-07	8.86927e-07	1.87784e-07	8.52221e-07	3.04509e-07	5.28966e-07	4.06505e-07	1.2735e-06	6.49333e-07	2.6692e-07	0	1.21329e-07	7.29727e-07	0	6.82967e-07	5.58961e-07	7.46174e-08	0
Aquificaceae	1.54174e-05	8.91962e-06	1.43691e-05	1.41345e-05	1.33436e-05	1.65302e-05	1.5216e-05	1.22792e-05	1.23985e-05	1.15943e-05	1.24666e-05	1.3351e-05	1.36372e-05	1.36344e-05	1.4443e-05	1.11964e-05	8.51972e-06	6.42044e-06	9.03733e-06	8.97476e-06	1.9797e-05	8.26006e-06	9.93232e-06	9.89291e-06
Archaeoglobaceae	5.59589e-06	4.41865e-06	4.48343e-06	6.10363e-06	4.55392e-06	3.91608e-06	5.2933e-06	5.46555e-06	8.33287e-06	4.33515e-06	5.07997e-06	6.4467e-06	5.17786e-06	6.0571e-06	5.04674e-06	4.42929e-06	3.66692e-06	1.95155e-06	4.27549e-06	4.57743e-06	4.2422e-06	4.41219e-06	4.78853e-06	5.22671e-06
Archangiaceae	0.00116808	0.00167465	0.00133011	0.00140365	0.00133156	0.00123951	0.00132583	0.00110337	0.00105836	0.00102283	0.00100481	0.00103194	0.00126974	0.00113611	0.00134419	0.0013069	0.000861195	0.000903863	0.000757684	0.00302035	0.000856828	0.000683549	0.000881441	0.000847877
Ardenticatenaceae	4.42459e-05	4.97083e-05	4.03381e-05	4.85073e-05	4.32758e-05	4.34457e-05	4.22692e-05	3.9813e-05	5.49266e-05	5.78514e-05	6.40937e-05	6.05286e-05	5.79395e-05	5.13713e-05	6.31106e-05	4.50904e-05	5.40784e-05	5.23397e-05	5.35224e-05	5.14004e-05	5.6351e-05	4.47244e-05	4.68886e-05	4.67825e-05
Arenicellaceae	1.70925e-06	2.09824e-06	1.75172e-06	2.06605e-06	1.32211e-06	2.16955e-06	1.30062e-06	2.83893e-06	1.95713e-06	3.08344e-06	3.89902e-06	1.86406e-06	1.54973e-06	2.06958e-06	1.18409e-06	2.32928e-06	1.96001e-06	4.75883e-06	3.14311e-06	3.15829e-06	1.4867e-06	1.66986e-06	1.49374e-06	2.34816e-06
Argynnaceae	4.44189e-07	3.50614e-07	7.787e-07	1.53866e-06	6.91198e-07	4.62017e-07	1.22442e-06	8.35574e-07	5.77663e-07	1.26513e-07	2.07134e-06	4.88736e-07	5.16367e-07	2.09537e-06	4.95623e-08	1.17368e-06	3.52912e-07	9.95103e-07	6.12492e-07	4.13069e-07	9.94752e-07	1.60263e-06	4.59105e-07	4.5912e-07
Armatimonadaceae	9.47565e-05	0.000136493	0.00013202	0.00014912	0.000199134	0.000209405	0.000212912	0.000185448	0.000136668	0.000134956	0.000149507	0.000147491	0.00013049	0.000113757	0.000160343	0.000140554	8.13438e-05	7.784e-05	7.15742e-05	6.92592e-05	0.00012973	7.94892e-05	0.000112445	0.000138171
Arthoniaceae	0	0	8.98342e-08	0	0	0	2.50926e-07	9.03936e-08	0	0	0	2.52136e-07	0	2.45488e-07	0	0	0	0	0	0	1.06323e-07	0	0	0
Arthrodermataceae	0	1.08055e-07	3.81615e-07	0	2.95887e-07	0	0	9.26255e-08	6.23877e-07	2.99202e-07	1.86858e-07	1.55695e-06	9.59465e-08	6.62151e-07	0	4.99713e-07	6.67083e-08	8.56192e-07	1.44802e-07	1.40383e-06	8.47258e-07	4.15862e-07	2.86136e-07	7.93434e-08
Ascobolaceae	9.82043e-08	8.66623e-07	1.67556e-07	0	7.01589e-08	4.94633e-07	2.88793e-07	5.8293e-07	1.12996e-06	8.16777e-07	4.06762e-07	1.40571e-06	3.20565e-07	2.19481e-06	5.42403e-07	3.0181e-07	9.27606e-07	1.27045e-06	2.05689e-06	3.42489e-06	2.5116e-07	4.13137e-06	2.26436e-06	3.34026e-07
Ascodesmidaceae	5.71254e-08	6.335e-07	2.43668e-08	1.0384e-07	8.89596e-08	2.52221e-08	5.09635e-08	4.7106e-07	3.34745e-07	4.45357e-07	0	4.8455e-07	2.4058e-07	2.50009e-06	1.18836e-07	3.51208e-07	8.52857e-07	1.21329e-07	4.60283e-07	2.66318e-07	2.64745e-07	8.27058e-07	8.65562e-08	0
Ascoideaceae	0	0	0	0	0	0	0	0	3.94827e-07	8.75702e-08	0	4.94736e-08	1.57395e-07	2.24362e-07	5.09683e-08	2.14583e-07	1.43227e-07	2.40076e-07	0	3.70951e-07	0	9.28698e-07	3.32662e-07	0
Ascosphaeraceae	0	3.24166e-07	0	0	2.55203e-07	0	0	4.96706e-07	9.0578e-08	4.70681e-07	1.39471e-07	1.64136e-07	0	1.17693e-06	2.53642e-07	3.43332e-07	1.14581e-07	8.15338e-07	8.6813e-07	9.86887e-07	0	5.10226e-07	1.25286e-06	1.387e-07
Ascoviridae	4.18822e-07	5.80002e-08	0	0	2.50199e-07	2.26999e-07	2.29336e-07	8.4145e-07	1.69834e-07	1.14614e-07	0	0	8.6954e-07	1.4982e-07	4.22737e-07	2.14583e-07	1.86696e-07	0	0	0	1.29777e-07	3.68589e-07	1.27288e-07	7.05923e-08
Aspergillaceae	1.99722e-05	2.17593e-05	3.0361e-05	1.35298e-05	4.30519e-05	2.17174e-05	2.19057e-05	4.17911e-05	5.22626e-05	7.46043e-05	2.94755e-05	8.18626e-05	4.75808e-05	0.000155919	4.026e-05	4.92891e-05	8.56814e-05	0.000122188	0.00011556	0.00017387	4.6074e-05	0.000246459	0.000181427	7.10302e-05
Astrosphaeriellaceae	0	0	0	0	0	0	1.17933e-07	0	2.90202e-07	0	1.32912e-07	1.40538e-07	6.67056e-08	4.31481e-07	7.44719e-08	1.00445e-06	0	0	7.9539e-07	1.84906e-07	0	2.8599e-07	0	0
Atheliaceae	3.01008e-07	9.89682e-07	3.46264e-07	5.86901e-07	1.62623e-07	2.19225e-07	3.52899e-07	1.13561e-07	1.26995e-06	9.04973e-07	7.4636e-07	9.95541e-07	1.39407e-07	2.31071e-06	1.2489e-06	1.13607e-06	2.63276e-07	9.98546e-08	8.13291e-07	1.20797e-06	2.33242e-07	8.28913e-07	7.39983e-07	6.6376e-07
Atopobiaceae	2.61954e-06	3.13995e-06	4.9415e-06	4.81626e-06	4.19883e-06	3.73625e-06	4.1035e-06	4.58116e-06	2.33612e-06	3.18792e-06	1.60367e-06	3.57625e-06	3.39031e-06	4.52317e-06	4.23702e-06	1.72015e-06	2.41779e-06	3.95346e-06	2.95062e-06	1.56253e-06	2.53481e-06	1.18416e-06	1.74195e-06	2.50105e-06
Aulographaceae	0	3.53195e-07	0	0	0	0	5.80658e-07	0	0	1.06764e-07	0	1.91117e-07	2.87839e-07	9.70262e-08	0	0	1.39135e-07	1.61194e-07	1.61351e-07	1.4944e-07	0	4.77411e-07	7.69593e-07	0
Aurantimonadaceae	9.89933e-05	0.000111009	0.000111978	0.000129314	0.000104188	0.000112132	0.000116184	0.000109298	0.000107113	0.000105394	0.000132904	0.00010071	0.000130241	0.00010568	9.84122e-05	0.000107158	0.000156071	0.000151873	0.000125615	0.000116088	0.000102679	8.59381e-05	0.000106546	0.000121424
Auriculariaceae	6.54252e-07	1.14878e-06	1.02579e-06	9.76315e-07	1.45852e-07	3.73662e-07	3.85538e-07	8.12514e-07	2.42574e-06	1.69503e-06	2.44924e-06	1.23169e-06	1.25808e-06	1.67808e-06	4.73413e-07	4.36303e-07	1.09696e-06	1.30538e-06	8.15646e-07	2.92301e-06	2.13703e-06	3.65401e-06	2.80312e-06	1.24109e-06
Autographiviridae	8.55371e-07	2.95628e-06	2.44248e-05	9.88417e-07	1.67098e-06	3.24821e-06	1.59897e-06	3.24661e-06	1.61018e-06	2.005e-06	1.95396e-06	1.95205e-06	2.13995e-06	2.72121e-06	1.62918e-06	6.08984e-07	1.29465e-06	2.66373e-06	4.78289e-07	4.3427e-06	1.4552e-05	5.17049e-06	4.15779e-06	1.71435e-05
Autolykiviridae	0	9.50365e-08	5.39005e-07	0	0	0	0	0	0	3.34018e-07	0	0	0	0	0	0	0	0	0	3.68945e-07	0	0	2.08569e-07	1.15669e-07
Azonexaceae	0.000139366	0.000144824	0.000165181	0.000143247	0.000174087	0.00011356	0.00010345	0.000126949	0.000156185	0.000183645	0.000137738	0.000181755	0.000146826	0.000232901	0.000139818	0.000130899	0.000190239	0.000316149	0.000196071	0.000231478	0.000148703	0.000296106	0.000250976	0.00017969
Bacillaceae	0.000584989	0.000697901	0.000876384	0.000443705	0.00087178	0.000570421	0.000490526	0.000930361	0.00121689	0.00171802	0.000700198	0.00175938	0.00116443	0.00295197	0.00098165	0.00113371	0.0015427	0.00242075	0.00219817	0.0031145	0.00103114	0.00455428	0.00321346	0.00144176
Bacillales_Family_X._Incertae_Sedis	1.94786e-06	2.65234e-06	1.1532e-06	2.41355e-06	1.98261e-06	1.82553e-06	1.74653e-06	1.84549e-06	2.19493e-06	2.06269e-06	1.00045e-06	2.06613e-06	1.95683e-06	1.41269e-06	1.82194e-06	6.65019e-07	9.98571e-07	4.80468e-07	1.89113e-06	8.88744e-07	9.03677e-07	6.74025e-07	1.90173e-06	2.13446e-06
Bacteriovoracaceae	7.02137e-06	9.52743e-06	1.00018e-05	8.87812e-06	7.03096e-06	6.91438e-06	7.27341e-06	5.67348e-06	8.89324e-06	6.8665e-06	1.0735e-05	7.9373e-06	8.53989e-06	9.56952e-06	1.20162e-05	9.99268e-06	6.80827e-06	7.92371e-06	6.5773e-06	9.50724e-06	7.78986e-06	8.01122e-06	9.55187e-06	1.21824e-05
Bacteroidaceae	6.04281e-05	6.42943e-05	7.01747e-05	6.40425e-05	5.8457e-05	6.59147e-05	6.4995e-05	5.35463e-05	5.96536e-05	7.16758e-05	6.04943e-05	6.10816e-05	6.32469e-05	6.07542e-05	7.43149e-05	6.93306e-05	6.33031e-05	5.37692e-05	5.65991e-05	5.68364e-05	7.0504e-05	4.74785e-05	5.77022e-05	6.29857e-05
Baculoviridae	2.64714e-07	7.65828e-08	7.23906e-07	1.54248e-07	1.32144e-07	0	0	0	3.34745e-07	0	0	7.58236e-08	0	5.1677e-07	0	7.93023e-08	0	1.22648e-07	2.45534e-07	0	9.5922e-08	1.81624e-07	1.88166e-07	0
Baekduiaceae	6.45472e-05	7.24431e-05	6.47006e-05	6.98926e-05	8.95501e-05	9.48342e-05	8.24249e-05	8.62328e-05	9.41244e-05	0.000104341	9.78515e-05	0.0001001	0.000111334	9.08965e-05	0.000115922	0.000109409	0.000105257	9.26453e-05	0.000102711	0.000103934	0.000106904	0.000119224	0.000114813	0.000127493
Balneatrichaceae	6.12025e-06	5.26384e-06	6.38131e-06	5.86602e-06	5.26964e-06	3.69435e-06	5.83057e-06	5.84751e-06	3.97955e-06	3.68427e-06	4.78277e-06	3.76648e-06	5.24883e-06	5.62428e-06	4.70539e-06	5.55777e-06	3.89693e-06	4.57007e-06	3.89395e-06	5.1409e-06	3.48404e-06	3.47946e-06	3.63613e-06	2.89114e-06
Balneicellaceae	5.69232e-07	0	0	0	1.9631e-07	2.05812e-07	1.03965e-07	7.2141e-08	1.49498e-07	7.56675e-08	0	6.7726e-08	1.86776e-07	9.05578e-08	6.97722e-08	3.09777e-07	4.99457e-07	4.10445e-07	2.19312e-07	2.68226e-07	0	0	4.52755e-07	3.84022e-07
Balneolaceae	9.98897e-05	9.21255e-05	9.30032e-05	9.52376e-05	8.83695e-05	9.12472e-05	9.10515e-05	8.07392e-05	0.000112585	0.000116454	0.000122637	0.000108955	0.000111007	9.76589e-05	0.000108409	0.000105789	0.000111714	0.000105174	9.7014e-05	0.00011197	0.000125498	0.000105163	0.00010002	0.000130811
Barnesiellaceae	1.32927e-06	3.47113e-06	1.23482e-06	2.53638e-06	2.10844e-06	2.60017e-06	3.47407e-06	2.25209e-06	2.16564e-06	3.13886e-06	1.2737e-06	1.73798e-06	9.47534e-07	1.43474e-06	2.80011e-06	1.93539e-06	1.67636e-06	2.53563e-07	1.10692e-06	1.79433e-06	0	5.38791e-07	2.25163e-07	1.04807e-06
Bartheletiaceae	0	0	0	0	0	0	0	0	0	3.07648e-07	0	0	0	0	0	0	0	0	0	0	0	0	0	0
Bartonellaceae	2.951e-06	4.03513e-06	3.56333e-06	4.55546e-06	3.84633e-06	2.6095e-06	3.50612e-06	4.62878e-06	5.17738e-06	3.19715e-06	3.31418e-06	2.26468e-06	2.2959e-06	3.41112e-06	3.79609e-06	4.65374e-06	6.00952e-06	5.18329e-06	4.89005e-06	5.47118e-06	3.88668e-06	1.66027e-06	3.03533e-06	2.99895e-06
Basidiobolaceae	3.16809e-06	2.73557e-06	3.56714e-06	2.2284e-06	4.96374e-06	4.12084e-06	3.02379e-06	4.64303e-06	5.16647e-06	6.08719e-06	3.72058e-06	9.4851e-06	4.01858e-06	1.54505e-05	5.69429e-06	5.87276e-06	7.01491e-06	7.42362e-06	9.29899e-06	1.46268e-05	4.28977e-06	2.83094e-05	1.81228e-05	5.18206e-06
Bdellovibrionaceae	3.59572e-05	6.16993e-05	6.71378e-05	6.51486e-05	6.57882e-05	6.05822e-05	6.36784e-05	5.61882e-05	6.58185e-05	6.35832e-05	6.0278e-05	6.13146e-05	7.54636e-05	5.21266e-05	6.96996e-05	7.68308e-05	6.78458e-05	7.64325e-05	7.9697e-05	6.95163e-05	5.68086e-05	6.2445e-05	5.24124e-05	7.60517e-05
Beijerinckiaceae	0.000256463	0.000301672	0.000263355	0.000286622	0.000263453	0.000259111	0.000302769	0.000308805	0.000240872	0.000220885	0.000256515	0.000227937	0.000278178	0.000259828	0.000235624	0.000256782	0.000283603	0.000303994	0.000265281	0.000235669	0.000201824	0.000184512	0.000216551	0.000241597
Bernardetiaceae	7.54275e-07	2.57371e-06	1.7356e-06	1.76999e-06	1.51201e-06	9.98899e-07	1.45912e-06	1.68391e-06	2.23912e-06	3.67683e-06	2.46011e-06	2.70393e-06	2.27377e-06	2.21137e-06	2.57229e-06	3.14005e-06	2.46011e-06	1.07164e-06	2.01375e-06	1.36367e-06	2.09651e-06	2.08667e-06	2.0796e-06	2.88667e-06
Beutenbergiaceae	4.09022e-06	8.53811e-06	6.27485e-06	6.26021e-06	9.4017e-06	1.19647e-05	8.97886e-06	7.80093e-06	8.34762e-06	7.4648e-06	8.23318e-06	6.18871e-06	8.55984e-06	5.52332e-06	6.21068e-06	6.18134e-06	7.07025e-06	8.70465e-06	5.19906e-06	6.01635e-06	3.50567e-06	4.27633e-06	4.14438e-06	5.65711e-06
Bifidobacteriaceae	2.11763e-05	2.04612e-05	2.72557e-05	2.05463e-05	3.05104e-05	2.8299e-05	2.21361e-05	4.62266e-05	5.33133e-05	8.17914e-05	3.7621e-05	9.13253e-05	6.07199e-05	0.000169052	5.5472e-05	5.35123e-05	8.0188e-05	0.000111504	0.000121818	0.000150588	5.01898e-05	0.000258077	0.000166002	7.19879e-05
Bionectriaceae	0	1.99697e-07	8.47299e-08	0	6.12578e-07	0	9.87014e-08	0	0	2.42079e-07	9.40551e-07	3.96351e-07	4.11815e-07	3.94692e-07	0	5.44667e-07	1.10675e-07	7.55547e-07	3.85041e-07	0	3.00846e-07	8.3404e-07	6.67362e-07	4.24658e-07
Blastocladiaceae	0	3.15886e-07	9.79937e-08	1.67872e-07	6.91204e-07	7.64462e-07	6.75463e-08	2.13223e-06	2.25573e-06	1.81882e-06	5.14272e-07	3.9572e-06	1.9133e-06	4.95715e-06	1.88299e-06	2.27953e-06	3.76153e-06	4.25711e-06	4.84296e-06	5.93166e-06	5.53324e-07	1.12547e-05	6.51627e-06	1.51544e-06
Blattabacteriaceae	1.19728e-07	9.86004e-08	6.44727e-07	1.84738e-07	1.70135e-07	0	3.10313e-07	3.17014e-07	2.68837e-07	5.20269e-07	4.89317e-07	3.29407e-07	4.13473e-07	9.56597e-08	1.01219e-07	1.51996e-07	4.94585e-07	3.93998e-07	7.49022e-07	1.78454e-06	3.15564e-07	2.49394e-07	2.12073e-07	1.00006e-07
Bogoriellaceae	3.69637e-05	4.56687e-05	4.38015e-05	4.1286e-05	5.39968e-05	5.33755e-05	5.65725e-05	5.75177e-05	5.09992e-05	4.84602e-05	5.80719e-05	4.29976e-05	4.72182e-05	4.95723e-05	5.25502e-05	4.86581e-05	4.39214e-05	4.72528e-05	4.38203e-05	4.18925e-05	4.54381e-05	4.57898e-05	5.67878e-05	4.83575e-05
Bolbitiaceae	1.2069e-06	3.00665e-06	1.65541e-06	3.35841e-06	1.13709e-06	1.07943e-06	1.47259e-06	3.19849e-06	1.90662e-06	3.72588e-06	3.09796e-06	3.07303e-06	1.71213e-06	5.53167e-06	2.7052e-06	1.91943e-06	2.90579e-06	2.74897e-06	4.24642e-06	5.34845e-06	1.5176e-06	1.06825e-05	4.85069e-06	2.99789e-06
Bondarzewiaceae	1.85961e-07	4.4913e-07	2.396e-07	7.60512e-07	9.1965e-08	1.6384e-06	8.03857e-08	9.81835e-07	1.00493e-06	1.50587e-06	2.2529e-06	2.18434e-06	1.17316e-06	3.81927e-06	1.33548e-06	9.33438e-07	5.19318e-06	6.13824e-06	2.56558e-06	4.20634e-06	1.36093e-06	5.11487e-06	3.454e-06	1.54991e-06
Borreliaceae	1.09252e-07	0	4.63342e-07	4.18092e-07	0	3.21582e-07	0	0	0	0	9.91658e-08	9.17865e-08	0	0	0	3.9999e-07	0	1.16886e-06	0	0	5.68307e-07	3.01977e-07	2.15254e-07	0
Botryobasidiaceae	1.70832e-06	1.48615e-06	1.06601e-06	1.02058e-06	1.52842e-06	1.73822e-06	7.48283e-07	2.11949e-06	9.20773e-07	2.15662e-06	1.10099e-06	1.53733e-06	1.41723e-06	3.56185e-06	1.11181e-06	2.56113e-06	9.3892e-07	1.78827e-06	2.43957e-06	2.09827e-06	8.39033e-07	2.48142e-06	1.73715e-06	5.82218e-07
Botryosphaeriaceae	8.08454e-07	9.98277e-07	1.12183e-06	6.26826e-07	1.39643e-06	1.18543e-06	2.4495e-06	1.02995e-06	1.48583e-06	5.94761e-07	1.94529e-06	1.34978e-06	1.16753e-06	7.3889e-06	1.15107e-06	1.17549e-06	1.79344e-06	2.72386e-06	2.86182e-06	6.38802e-06	2.00706e-06	4.69808e-06	3.43305e-06	1.21056e-06
Brachybasidiaceae	0	7.37199e-08	2.90503e-07	7.42407e-08	0	7.21305e-08	0	6.06677e-07	0	1.69429e-07	0	0	1.52263e-07	0	2.99439e-07	0	0	1.22648e-07	0	1.13705e-07	0	3.3337e-07	0	0
Brachyspiraceae	1.58209e-06	1.67935e-06	7.07404e-07	1.17091e-06	1.00372e-06	1.41323e-06	1.62138e-06	1.47831e-06	2.75334e-06	2.59292e-06	1.76706e-06	2.19653e-06	2.24516e-06	7.36212e-07	1.50417e-06	1.20293e-06	7.46575e-07	2.8566e-07	3.65477e-07	4.35799e-07	9.10241e-07	7.68023e-07	1.72537e-06	1.12312e-06
Bradymonadaceae	6.00839e-05	6.37697e-05	6.73532e-05	7.85446e-05	6.317e-05	7.01959e-05	8.5379e-05	6.36586e-05	6.60539e-05	5.6771e-05	5.5076e-05	5.87704e-05	7.11505e-05	5.80825e-05	8.11787e-05	6.80256e-05	4.96981e-05	6.36392e-05	5.07899e-05	5.53109e-05	4.75445e-05	3.46068e-05	4.70966e-05	4.58398e-05
Bradyrhizobiaceae	0.0110055	0.0194462	0.0106504	0.0124942	0.0127413	0.0122292	0.0169348	0.0184314	0.0159186	0.0097036	0.01002	0.0105901	0.0121535	0.0131789	0.00906173	0.0123601	0.0107615	0.013222	0.011241	0.0118076	0.0084225	0.0105155	0.0133573	0.0112625
Brevibacteriaceae	1.04973e-05	1.15166e-05	1.0768e-05	1.36458e-05	1.43518e-05	1.68317e-05	1.60829e-05	1.31454e-05	1.36381e-05	1.73983e-05	1.36165e-05	1.60919e-05	1.20768e-05	1.07018e-05	1.17666e-05	1.45339e-05	8.65189e-06	1.0316e-05	9.42422e-06	8.14204e-06	1.05858e-05	6.92392e-06	8.05288e-06	1.44291e-05
Brevinemataceae	1.58344e-07	9.0667e-08	0	0	0	6.60413e-07	2.16595e-07	5.28357e-07	7.40301e-08	2.58071e-07	1.80392e-07	2.14331e-07	9.49727e-07	2.01113e-07	3.51003e-07	3.44341e-07	0	0	0	0	7.59753e-07	8.18034e-07	2.11059e-07	5.07574e-07
Brucellaceae	4.30709e-05	5.39939e-05	5.38042e-05	5.36234e-05	4.72492e-05	5.04857e-05	3.98816e-05	6.48245e-05	7.44208e-05	4.23396e-05	4.65193e-05	4.48958e-05	4.56442e-05	4.06356e-05	4.00356e-05	4.86269e-05	5.58931e-05	6.03132e-05	5.22047e-05	5.26267e-05	4.84204e-05	4.14148e-05	4.57453e-05	5.46222e-05
Bryobacteraceae	0.000953148	0.00112683	0.000980248	0.000989823	0.00110287	0.00107675	0.00103823	0.0011769	0.000840396	0.000871651	0.000985569	0.000884467	0.000808194	0.000764938	0.000806134	0.000891028	0.000857302	0.000885466	0.000846795	0.000754977	0.000778835	0.000587229	0.000573933	0.000696988
Budviciaceae	2.43848e-06	3.2836e-06	2.52336e-06	4.63597e-06	3.13795e-06	5.45531e-06	3.90517e-06	3.56081e-06	2.92455e-06	2.3946e-06	2.24187e-06	2.11965e-06	2.65427e-06	2.96021e-06	4.09112e-06	3.16882e-06	2.95986e-06	2.98164e-06	1.63161e-06	2.06577e-06	3.71595e-06	2.60255e-06	2.06757e-06	4.94352e-06
Bulleribasidiaceae	7.10584e-08	0	0	0	0	0	0	0	0	0	0	0	0	0	0	0	3.69851e-07	0	0	0	1.00445e-06	6.79243e-08	0	3.12213e-07
Burkholderiaceae	0.00694331	0.00758154	0.00773275	0.00597912	0.0064616	0.00583851	0.00552889	0.00616698	0.00459248	0.00379157	0.00438089	0.0044251	0.00415197	0.00360779	0.00419929	0.00413743	0.00473623	0.00511281	0.00435106	0.00464311	0.00431611	0.00400896	0.00498136	0.00548848
Caedimonadaceae	4.92673e-06	5.58754e-06	3.73655e-06	2.18888e-06	4.36565e-06	4.56619e-06	4.23982e-06	6.52447e-06	6.56518e-06	2.58649e-06	2.71104e-06	5.07344e-06	4.70628e-06	2.7836e-06	2.51536e-06	2.51345e-06	3.84216e-06	4.04557e-06	2.89478e-06	2.98911e-06	5.65681e-07	2.19024e-06	1.84392e-06	1.79629e-06
Calcarisporiellaceae	0	0	0	0	0	0	0	0	0	0	0	0	0	0	0	0	0	0	0	0	0	3.09433e-07	0	0
Caldicoprobacteraceae	2.13105e-06	2.02672e-06	1.60074e-06	2.7481e-06	1.72084e-06	2.01418e-06	3.57196e-06	2.51857e-06	2.29969e-06	2.71201e-06	1.68931e-06	1.73046e-06	3.7903e-06	2.38514e-06	2.69723e-06	1.49402e-06	1.921e-06	1.60061e-06	2.07567e-06	3.495e-06	9.86344e-07	2.24422e-06	2.96763e-06	1.80178e-06
Caldilineaceae	0.000124664	0.000120298	0.00012964	0.000142143	0.000108637	0.000115694	0.000106736	0.000116278	0.000152123	0.000162546	0.000191019	0.000171376	0.000163484	0.000145556	0.000162372	0.000139323	0.000143614	0.000150698	0.000146807	0.000153602	0.000154538	0.00012968	0.000136044	0.000150551
Caldisericaceae	4.8669e-07	6.17642e-06	3.16406e-07	1.11365e-06	7.80386e-07	1.90443e-07	3.34175e-07	4.57955e-07	5.29386e-07	1.14579e-06	3.74465e-07	7.74241e-07	6.81902e-06	3.38624e-06	3.02164e-06	3.39191e-06	1.54959e-06	7.79777e-07	1.46387e-06	4.40206e-07	1.02412e-06	1.58645e-06	1.03785e-06	8.4218e-07
Caldisphaeraceae	5.53176e-07	1.88571e-07	2.57171e-07	0	0	0	1.97403e-07	0	1.41268e-07	0	0	0	1.92773e-07	3.11552e-07	1.569e-07	0	0	0	3.75846e-07	5.29662e-07	6.9903e-07	2.11511e-07	2.1913e-07	1.21526e-07
Calditrichaceae	0.000143835	0.000121896	0.000152423	0.000138226	0.000131445	0.00013187	0.00013168	0.000107605	0.000133095	0.000135727	0.000154172	0.000140969	0.000140643	0.000110571	0.000148537	0.000127841	0.000157264	0.000151561	0.000154172	0.000123437	0.00015754	0.00012184	0.000136433	0.000151351
Calotrichaceae	0.000174696	0.000172536	0.000185818	0.000181526	0.000186296	0.000176356	0.000194291	0.000168486	0.000165858	0.000158609	0.000178142	0.000182869	0.000167193	0.000149572	0.000166233	0.000175671	0.000165159	0.000154241	0.000144169	0.000149885	0.000174866	0.000146695	0.000153945	0.000168202
Campylobacteraceae	2.54378e-05	3.39637e-05	3.07754e-05	3.52664e-05	2.75373e-05	3.13998e-05	2.59571e-05	2.62585e-05	3.56984e-05	2.99881e-05	2.9639e-05	2.93932e-05	3.00926e-05	2.26496e-05	2.95174e-05	2.93397e-05	3.808e-05	4.49788e-05	3.89355e-05	3.55972e-05	3.50552e-05	3.41119e-05	2.67257e-05	2.99438e-05
Candidatus_Babeliaceae	1.03658e-06	4.10308e-07	2.20906e-07	1.36534e-06	4.87763e-07	1.64212e-07	8.07257e-07	8.57281e-07	0	3.35677e-07	1.55083e-06	5.85223e-07	1.40003e-06	5.08066e-07	0	6.06063e-07	2.82302e-07	0	0	4.48321e-07	0	3.63247e-07	1.23652e-07	0
Candidatus_Brocadiaceae	0.000216816	0.000209905	0.000202033	0.000223157	0.00019707	0.000198449	0.000201466	0.000188533	0.000185035	0.00018966	0.000202462	0.000205792	0.000202095	0.000176465	0.000201892	0.000194323	0.000179375	0.00016007	0.000189633	0.00015902	0.0002096	0.000175602	0.0001693	0.000181432
Candidatus_Chazhemtobacteraceae	4.21546e-07	2.11049e-07	5.77234e-07	1.19337e-06	8.33376e-07	2.82388e-07	4.13155e-07	2.27463e-07	3.46808e-08	2.95579e-07	4.73328e-07	6.19781e-07	1.52583e-06	1.44539e-07	3.08026e-07	5.01739e-07	5.31706e-07	1.96236e-07	0	9.87004e-07	6.53667e-07	4.90457e-07	1.9506e-07	3.62964e-07
Candidatus_Competibacteraceae	0.000256294	0.000241447	0.000260166	0.000261158	0.000218583	0.000217174	0.000224151	0.000217838	0.000235544	0.000217491	0.000250431	0.000249962	0.000234288	0.000199219	0.000233464	0.00022322	0.000226293	0.00022858	0.000223071	0.000204708	0.000210446	0.000191005	0.00022995	0.000251294
Candidatus_Cryosericaceae	5.93673e-06	6.19354e-06	3.47931e-06	4.44078e-06	5.57679e-06	5.44693e-06	5.23499e-06	4.70728e-06	5.73509e-06	5.37802e-06	6.67393e-06	5.90105e-06	6.26914e-06	5.77869e-06	5.88556e-06	3.99905e-06	2.75201e-06	3.37915e-06	3.43118e-06	3.435e-06	5.55756e-06	3.69644e-06	4.23826e-06	4.56231e-06
Candidatus_Desulfofervidaceae	6.29624e-06	6.73321e-06	8.78749e-06	1.06505e-05	6.75705e-06	6.88567e-06	7.03482e-06	7.05631e-06	6.78518e-06	7.55052e-06	6.8631e-06	7.36347e-06	7.39248e-06	5.01724e-06	6.68576e-06	9.82856e-06	7.36976e-06	8.30616e-06	8.49248e-06	5.35452e-06	7.92532e-06	9.13198e-06	4.23287e-06	7.47673e-06
Candidatus_Fermentibacteraceae	8.50793e-07	6.75292e-07	2.52864e-06	1.25519e-06	4.49726e-07	5.63879e-07	3.52022e-07	6.97304e-07	1.16359e-06	3.27172e-06	6.5566e-07	1.58868e-06	1.06753e-06	1.11749e-06	1.11691e-06	9.532e-07	2.53097e-06	5.34749e-07	2.42539e-06	1.01058e-06	2.54588e-07	1.81622e-06	7.60533e-07	9.58638e-07
Candidatus_Magnetaquicoccaceae	3.88351e-06	2.38057e-06	3.31517e-06	4.75809e-06	3.22163e-06	2.50079e-06	1.99127e-06	2.29378e-06	2.33759e-06	1.84732e-06	3.7021e-06	3.14386e-06	1.40315e-06	2.82072e-06	1.71412e-06	1.34813e-06	2.30299e-06	1.03621e-06	2.02964e-06	2.31722e-06	1.34246e-06	1.45457e-06	1.69771e-06	9.96533e-07
Candidatus_Mcinerneyibacteriaceae	0	0	2.69502e-07	0	3.88881e-07	0	0	0	2.43724e-07	4.19019e-07	2.21665e-07	8.40455e-08	7.53128e-08	0	7.04562e-08	7.15276e-08	0	0	0	0	0	0	0	0
Candidatus_Methanoliparaceae	0	0	0	0	0	0	0	0	1.01304e-07	0	0	0	0	4.46831e-07	0	0	0	0	0	0	0	0	0	1.26323e-07
Candidatus_Methanollivieraceae	4.53289e-07	2.27087e-06	9.26199e-07	1.20252e-06	4.49521e-07	1.39719e-06	1.80535e-06	9.57149e-07	6.80924e-07	9.28464e-07	4.33967e-07	9.47784e-07	8.91937e-07	8.66165e-07	4.031e-07	4.08903e-07	0	7.97407e-07	8.82386e-08	5.52602e-07	7.95029e-08	5.55306e-07	0	2.41504e-07
Candidatus_Methanomethyliaceae	1.06503e-06	1.12945e-06	7.8914e-07	1.82059e-06	7.33636e-07	1.30653e-06	8.76281e-07	5.67881e-07	7.34471e-07	9.91656e-07	1.61984e-06	1.6655e-06	9.74983e-07	4.10867e-07	8.19002e-07	2.42816e-06	2.47194e-06	1.02785e-06	1.50831e-06	2.05573e-06	1.1234e-06	1.55403e-06	1.52054e-06	9.75801e-07
Candidatus_Methanomethylophilaceae	0	0	0	4.3647e-07	7.16715e-07	0	0	0	0	6.23103e-07	1.09226e-07	3.12348e-07	1.87979e-07	0	8.07476e-08	5.28682e-07	0	0	0	0	0	0	0	0
Candidatus_Methanoperedenaceae	6.03692e-05	5.16076e-05	6.01531e-05	6.00968e-05	5.81709e-05	5.62314e-05	5.71625e-05	4.69395e-05	5.06078e-05	5.84559e-05	7.03576e-05	6.21895e-05	4.83886e-05	5.2412e-05	5.2433e-05	5.54965e-05	6.44098e-05	6.74903e-05	6.91159e-05	5.79475e-05	7.56362e-05	5.57756e-05	5.69042e-05	6.66189e-05
Candidatus_Midichloriaceae	3.35262e-07	1.43841e-07	3.55059e-07	6.14662e-07	1.12278e-06	6.10104e-07	1.03289e-06	6.21781e-07	1.06634e-06	3.15347e-07	4.84619e-07	1.08673e-06	3.95632e-07	7.97023e-07	5.85849e-07	6.17073e-07	3.0711e-06	1.4937e-06	2.73414e-07	3.37694e-07	4.81721e-07	3.40723e-07	3.60714e-07	1.13194e-06
Candidatus_Nanopelagicaceae	1.11629e-06	8.15721e-07	4.99017e-06	5.83314e-07	1.55458e-06	2.13481e-06	1.03952e-06	8.63406e-07	5.51902e-07	1.59313e-06	8.63218e-07	1.10608e-06	1.10648e-06	3.85839e-07	5.69292e-07	2.82837e-06	2.06702e-06	2.99742e-06	2.55185e-06	1.51948e-06	2.52138e-07	6.04215e-07	5.79007e-07	1.02611e-06
Candidatus_Nitrosocaldaceae	8.34547e-06	7.39746e-06	6.02008e-06	7.43864e-06	6.26247e-06	9.16515e-06	8.67581e-06	6.70251e-06	9.21493e-06	9.38694e-06	1.22675e-05	1.25664e-05	8.26984e-06	8.28311e-06	7.89489e-06	1.09909e-05	8.74063e-06	8.71458e-06	9.09814e-06	8.87101e-06	1.15917e-05	8.56968e-06	9.52568e-06	1.04822e-05
Candidatus_Ozemobacteraceae	4.04956e-06	4.07429e-06	4.61966e-06	3.93885e-06	3.6195e-06	4.02274e-06	3.06934e-06	4.18555e-06	5.24956e-06	2.27044e-06	2.80125e-06	2.21095e-06	3.61737e-06	4.17912e-06	4.2694e-06	4.28377e-06	4.28098e-06	3.50145e-06	2.07396e-06	2.6665e-06	2.04041e-06	2.45167e-06	1.73057e-06	3.51872e-06
Candidatus_Paracaedibacteraceae	3.66439e-06	4.29064e-06	2.62427e-06	5.00941e-06	4.58369e-06	4.21963e-06	4.19035e-06	2.60607e-06	7.01318e-06	4.1695e-06	5.34579e-06	5.41377e-06	4.10623e-06	7.33085e-06	6.06536e-06	5.95434e-06	5.89756e-06	4.69748e-06	3.61945e-06	2.73031e-06	2.5475e-06	3.21681e-06	2.67795e-06	1.2517e-06
Candidatus_Parilichlamydiaceae	0	0	0	0	0	0	0	0	3.99955e-07	0	0	0	0	3.77324e-07	0	0	0	0	0	0	0	0	0	0
Candidatus_Poseidoniaceae	7.24608e-08	1.14913e-06	1.11482e-06	3.62001e-07	2.3756e-07	9.8032e-07	5.46177e-07	6.32253e-07	4.5992e-07	1.08247e-07	7.61273e-08	3.03404e-07	9.46499e-08	2.77639e-08	4.67949e-07	2.51957e-07	0	0	0	5.69748e-07	4.78866e-07	2.13921e-07	2.79775e-07	0
Candidatus_Sumerlaeaceae	2.68176e-06	2.87341e-06	3.41442e-06	2.65648e-06	1.66947e-06	3.60492e-06	4.43028e-06	3.83901e-06	2.84152e-06	3.33225e-06	4.03913e-06	4.10434e-06	4.6784e-06	2.7431e-06	2.9864e-06	4.38466e-06	2.2596e-06	3.11229e-06	4.68719e-06	2.47425e-06	3.06331e-06	1.97621e-06	2.49701e-06	2.4353e-06
Candidatus_Termititenacaceae	5.74943e-07	1.28173e-06	3.46678e-07	5.27959e-07	1.7858e-06	8.03926e-07	6.61069e-07	2.96478e-07	3.68207e-07	1.69299e-06	9.59715e-07	3.95422e-07	2.04036e-07	1.24686e-06	5.8725e-07	2.80857e-07	1.67921e-07	4.44297e-07	1.56027e-06	1.43299e-07	4.10457e-08	1.38912e-07	0	5.94793e-07
Candidatus_Thalassarchaeaceae	2.18181e-06	4.81444e-06	3.71661e-06	2.65032e-06	1.1144e-06	7.63993e-07	3.12033e-07	1.40227e-06	8.43089e-07	1.4513e-06	4.79781e-06	6.98757e-07	2.2741e-06	3.94918e-06	3.29681e-06	3.88358e-06	2.43912e-06	1.95745e-06	1.81877e-08	3.83908e-07	2.31512e-06	1.38213e-06	6.75827e-07	5.97563e-06
Candidatus_Thermochlorobacteriaceae	1.05001e-05	9.14477e-06	9.42527e-06	9.4716e-06	1.1925e-05	9.93434e-06	1.14151e-05	1.08579e-05	1.10045e-05	1.18221e-05	1.10865e-05	8.88642e-06	9.49576e-06	8.59529e-06	9.35271e-06	1.18914e-05	6.65211e-06	4.59733e-06	9.06633e-06	5.65349e-06	1.04706e-05	7.43738e-06	5.87504e-06	1.03269e-05
Cantharellaceae	6.67189e-08	0	0	0	1.03899e-07	0	0	5.72723e-08	1.39257e-06	3.24979e-07	9.30444e-08	3.52372e-07	0	0	1.09718e-07	5.56932e-08	0	9.01264e-07	1.39439e-07	7.98537e-08	0	0	2.13719e-07	2.37051e-07
Capnodiaceae	1.09252e-07	3.50813e-07	2.36448e-07	3.04002e-07	9.13478e-08	2.26022e-07	3.37422e-07	1.73741e-07	2.17331e-07	2.20939e-07	4.93789e-07	2.76788e-07	1.75102e-07	2.71362e-07	9.64635e-08	6.91058e-07	6.08714e-08	2.47991e-07	1.68575e-07	3.76475e-07	4.38843e-07	1.18603e-06	8.82783e-07	9.5899e-07
Capsulimonadaceae	0.000107007	0.000152205	0.000119305	0.000135669	0.000174751	0.000186206	0.000188901	0.000160858	0.000114282	0.000117156	0.00011438	0.000110012	0.00011369	0.00011508	0.000130524	0.000127266	7.76433e-05	6.66462e-05	5.97095e-05	6.3764e-05	0.000103012	7.73178e-05	9.46831e-05	0.000104899
Cardiobacteriaceae	4.13785e-06	3.33324e-06	3.32215e-06	4.72824e-06	2.61545e-06	2.58017e-06	3.39937e-06	3.81072e-06	3.8208e-06	3.56786e-06	3.36048e-06	1.75945e-06	3.52437e-06	2.9094e-06	4.42821e-06	4.92018e-06	3.62854e-06	2.71528e-06	2.75447e-06	3.58842e-06	2.35673e-06	2.55199e-06	1.7025e-06	2.6062e-06
Carnobacteriaceae	3.22916e-06	7.96746e-06	6.21656e-06	2.9908e-06	3.04201e-06	4.45788e-06	6.25724e-06	5.21221e-06	5.03098e-06	5.26764e-06	4.98944e-06	5.46781e-06	4.80856e-06	3.9964e-06	4.92075e-06	4.96631e-06	4.66805e-06	4.92622e-06	5.30625e-06	5.33903e-06	9.64745e-06	4.29314e-06	4.92461e-06	5.21704e-06
Casimicrobiaceae	9.75585e-05	7.86284e-05	0.000111352	8.83946e-05	7.75978e-05	8.65531e-05	7.34332e-05	6.59431e-05	7.35509e-05	7.62883e-05	9.08512e-05	7.05085e-05	6.20481e-05	5.03013e-05	7.61719e-05	6.49987e-05	6.87379e-05	5.92262e-05	5.49071e-05	5.59966e-05	6.81379e-05	6.70501e-05	8.10015e-05	8.64143e-05
Catabacteriaceae	4.37209e-07	9.98485e-08	3.52424e-07	3.09497e-07	5.22389e-07	7.61881e-07	1.01265e-07	1.80787e-07	6.08955e-07	2.95965e-07	3.92897e-07	1.76602e-07	7.95615e-07	4.21317e-07	0	3.04609e-07	4.93135e-07	9.4729e-07	1.42969e-07	1.32416e-07	1.11707e-07	1.05756e-07	1.23652e-07	1.71168e-07
Catalimonadaceae	2.30219e-05	2.47892e-05	3.18388e-05	2.53805e-05	2.28851e-05	2.44372e-05	2.80539e-05	2.03631e-05	2.40965e-05	2.69276e-05	2.7133e-05	2.68463e-05	2.84428e-05	1.79439e-05	2.80826e-05	2.29547e-05	2.20167e-05	2.45628e-05	2.12658e-05	1.97726e-05	3.17318e-05	1.87226e-05	2.43808e-05	2.94474e-05
Catenariaceae	1.21391e-07	3.33297e-07	1.81859e-07	2.00041e-07	1.33403e-07	6.5365e-07	2.16595e-07	9.35102e-07	1.38658e-06	8.81442e-07	1.1024e-06	2.95766e-06	7.84065e-07	2.85386e-06	8.39152e-07	1.16492e-06	2.22933e-06	1.60282e-06	2.24597e-06	3.41777e-06	1.10512e-06	5.36994e-06	3.78755e-06	1.56781e-06
Catenulisporaceae	7.9546e-05	0.000102671	0.00012272	0.000242767	0.000149519	0.000170138	0.000155204	0.000215546	7.16677e-05	8.84278e-05	8.65252e-05	6.54883e-05	8.24527e-05	9.25287e-05	7.28229e-05	0.000102537	0.000312471	0.000394926	0.000484501	0.000557542	0.000116259	0.000218969	0.000206233	0.000142183
Caulimoviridae	1.66899e-05	1.05462e-05	4.04279e-05	4.48144e-06	3.18975e-05	2.01914e-05	5.90978e-06	7.97525e-05	0.000107142	0.000172185	4.26396e-05	0.000199322	0.000112046	0.000379565	6.78601e-05	0.000113121	0.000191136	0.000254902	0.000290739	0.000442816	0.000106468	0.000749266	0.000458352	0.000160529
Caulobacteraceae	0.00357421	0.00431902	0.00462152	0.00455403	0.00541197	0.00493856	0.00540035	0.00544891	0.00277386	0.00248418	0.00253329	0.00255537	0.00278707	0.00295541	0.00264131	0.00346256	0.00269627	0.00249801	0.00223322	0.00224762	0.00330316	0.00276622	0.0038586	0.00376371
Caulochytriaceae	5.36207e-08	0	5.60381e-07	0	1.81478e-07	8.48127e-08	0	7.83095e-07	6.8301e-07	6.04511e-07	8.97214e-08	9.23983e-07	5.73929e-07	1.58951e-06	6.93685e-07	5.21129e-07	1.13358e-06	4.19988e-07	2.03982e-06	2.2572e-06	8.26001e-07	4.14221e-06	1.544e-06	1.02984e-06
Celerinatantimonadaceae	5.32938e-07	3.84782e-07	0	0	4.61796e-07	5.92629e-07	1.11392e-07	3.72846e-07	0	0	3.58886e-07	0	1.70831e-07	9.70262e-08	0	1.77947e-07	1.21743e-07	0	9.33433e-08	1.72906e-07	0	0	3.20158e-07	1.20007e-07
Cellulomonadaceae	0.000146573	0.000153384	0.000191587	0.00016535	0.000222792	0.000212487	0.000228637	0.000227649	0.000156486	0.000184673	0.000183449	0.000154693	0.000164871	0.000190519	0.000157338	0.000181363	0.000160497	0.000172555	0.000163651	0.000161414	0.000182885	0.000135009	0.000185755	0.000181087
Cellvibrionaceae	0.00011017	0.000107093	0.000125494	0.000130965	0.000100667	0.000107333	0.000136023	0.000117066	0.000129954	0.000113878	0.00012633	0.000112063	0.000115831	0.000100165	0.000114517	0.000114491	0.000128408	0.000144199	0.000111404	0.000116142	0.000101137	7.41964e-05	0.000100698	9.49367e-05
Cenarchaeaceae	1.04874e-06	1.38224e-06	2.21598e-06	2.02127e-06	9.54629e-07	1.3446e-06	1.17951e-06	1.44669e-06	1.28134e-06	1.8983e-06	4.83481e-07	2.19335e-06	1.72788e-06	1.77239e-06	8.52659e-07	1.00836e-06	1.67711e-07	2.78962e-07	1.03715e-06	1.1515e-06	9.96165e-07	6.35723e-07	3.97376e-07	3.51745e-07
Ceraceosoraceae	2.30005e-07	6.22739e-07	9.20799e-07	2.4079e-07	6.04718e-07	1.13174e-06	3.60834e-07	7.27017e-07	7.07972e-07	9.00442e-07	2.41366e-07	1.86523e-06	9.63089e-07	4.21579e-06	6.4283e-07	1.22897e-06	2.1479e-06	1.69015e-06	1.85969e-06	3.47112e-06	2.75455e-07	5.45881e-06	2.40792e-06	9.26957e-07
Ceratobasidiaceae	3.00017e-06	8.61109e-06	5.65447e-06	6.86545e-06	2.56382e-06	2.23711e-06	3.80329e-06	4.05233e-06	5.19812e-06	7.41451e-06	4.57854e-06	4.31607e-06	2.8815e-06	9.86348e-06	2.3288e-06	2.41565e-06	3.67752e-06	6.23225e-06	5.83085e-06	6.54058e-06	6.27314e-06	1.60736e-05	9.9234e-06	3.61083e-06
Ceratocystidaceae	0	5.67484e-08	3.72812e-07	4.60508e-07	0	0	0	4.22686e-07	7.57692e-07	9.51625e-07	1.22657e-06	6.54384e-07	6.5486e-07	3.73044e-07	0	3.12678e-07	1.39135e-07	3.13433e-07	8.12557e-08	0	0	0	3.6752e-07	1.37151e-07
Cesiribacteraceae	1.21809e-05	1.38661e-05	1.35649e-05	1.14535e-05	1.13289e-05	1.56308e-05	1.22032e-05	8.94328e-06	1.23709e-05	1.37607e-05	1.3495e-05	1.39921e-05	1.74401e-05	1.26126e-05	1.76483e-05	1.52365e-05	1.29065e-05	1.49666e-05	1.80433e-05	1.10591e-05	1.35263e-05	1.3001e-05	1.33194e-05	1.46393e-05
Chaetomiaceae	1.6096e-06	1.31099e-06	1.67704e-06	2.0605e-06	2.98682e-06	2.05908e-06	1.5322e-05	3.21584e-06	3.24861e-06	2.75695e-06	4.87263e-06	6.6238e-07	1.43348e-06	2.8663e-06	1.2426e-06	2.50128e-06	1.63448e-06	2.08983e-06	2.82421e-06	1.56215e-06	1.3438e-06	1.38409e-06	1.33444e-06	1.47874e-06
Chamaesiphonaceae	2.39377e-05	2.65991e-05	2.44874e-05	2.36221e-05	2.11067e-05	2.06703e-05	2.81848e-05	1.87001e-05	2.06417e-05	2.39554e-05	2.40758e-05	2.59002e-05	2.42425e-05	2.08335e-05	2.67962e-05	2.44715e-05	1.58225e-05	1.68162e-05	1.55447e-05	1.17745e-05	2.3816e-05	1.47003e-05	1.638e-05	1.9237e-05
Chaseviridae	0	0	9.09297e-08	0	0	9.41214e-08	0	0	0	0	3.67639e-07	1.70141e-07	1.70831e-07	8.28273e-08	0	0	0	0	1.37738e-07	0	1.0762e-07	0	0	0
Chelatococcaceae	7.39709e-05	7.9868e-05	8.15407e-05	8.53799e-05	7.25579e-05	5.92024e-05	6.64877e-05	6.34042e-05	7.79726e-05	6.95456e-05	8.49896e-05	7.04015e-05	8.2378e-05	6.50002e-05	6.68181e-05	6.62521e-05	9.32113e-05	9.90959e-05	9.41169e-05	8.8655e-05	7.06363e-05	7.00952e-05	7.65604e-05	9.42286e-05
Chitinispirillaceae	3.10642e-06	3.56181e-06	1.57983e-06	2.8633e-06	4.39314e-06	3.84487e-06	2.42684e-06	2.80122e-06	2.40993e-06	2.58888e-06	2.06784e-06	2.93135e-06	3.13949e-06	2.97411e-06	2.40799e-06	3.16244e-06	1.36577e-06	8.43225e-07	2.07631e-06	1.67815e-06	9.91573e-07	9.08547e-07	2.39761e-06	1.18108e-06
Chitinivibrionaceae	0	1.82382e-07	4.4463e-07	3.30981e-07	0	0	4.8308e-07	2.1684e-07	0	2.54144e-07	3.05538e-07	6.59871e-07	6.73042e-07	1.05701e-06	0	3.83714e-07	3.62411e-07	0	3.98163e-07	1.53836e-07	5.10105e-08	9.6586e-08	6.60283e-07	0
Chitinophagaceae	0.0134359	0.0124384	0.0183404	0.0144453	0.0141869	0.0162424	0.0132245	0.0126415	0.0160334	0.0159945	0.0159508	0.0153901	0.0172965	0.0160221	0.0183365	0.0166075	0.0174641	0.016129	0.0153812	0.0155702	0.0206956	0.0131132	0.0139697	0.0178563
Chlamydiaceae	1.04908e-05	9.55828e-06	4.73679e-06	4.62272e-06	9.42425e-06	1.15923e-05	8.48469e-06	9.30568e-06	8.89239e-06	7.07788e-06	5.97635e-06	5.93182e-06	1.08338e-05	1.26269e-05	8.02165e-06	1.24262e-05	9.23854e-06	1.09748e-05	3.08648e-06	4.12796e-06	1.17732e-05	8.20107e-06	7.5651e-06	1.01651e-05
Chlorobiaceae	0.000101769	0.000102235	0.00010979	0.000105397	0.000104068	0.000106149	0.00011733	0.000104023	9.89992e-05	0.000100166	0.000109453	9.98376e-05	9.31653e-05	8.60184e-05	0.000105743	9.79493e-05	9.53444e-05	8.22405e-05	0.000105321	7.97803e-05	0.000101808	8.3963e-05	8.64905e-05	9.67949e-05
Chlorociboriaceae	6.11201e-08	5.5161e-08	3.84626e-07	0	0	3.93843e-07	0	5.36068e-07	8.84957e-08	3.23252e-07	0	1.81295e-07	3.85219e-07	0	4.27071e-07	7.94864e-07	6.61189e-07	0	0	1.20239e-07	1.83851e-07	6.51735e-07	9.01627e-08	9.51644e-07
Chloroflexaceae	0.000137325	0.000159743	0.000143352	0.000159569	0.000155054	0.000145927	0.000148335	0.000139137	0.000169655	0.000167079	0.000174131	0.000168072	0.000184647	0.000166236	0.000181784	0.000165949	0.000135585	0.00015419	0.000137231	0.000122561	0.000156443	0.000119163	0.000144767	0.000137648
Chlorogloeopsidaceae	2.85581e-05	2.60929e-05	2.2723e-05	2.75561e-05	2.72471e-05	2.33875e-05	3.07386e-05	2.28569e-05	2.02929e-05	2.59845e-05	2.2823e-05	2.18489e-05	2.54039e-05	2.36693e-05	2.69345e-05	2.41245e-05	1.76179e-05	2.00187e-05	1.67742e-05	2.05994e-05	2.31036e-05	1.91213e-05	1.96396e-05	2.54644e-05
Choanephoraceae	0	1.6783e-07	0	0	1.49681e-06	4.41172e-07	0	8.44565e-07	3.99228e-07	1.55227e-06	3.6287e-07	8.68944e-07	1.37602e-06	3.48425e-06	6.60482e-07	3.72445e-07	1.19152e-06	6.56509e-07	1.90538e-06	1.83017e-06	1.46514e-06	4.96508e-06	2.35663e-06	8.94169e-07
Christensenellaceae	2.79763e-06	1.45729e-06	1.92378e-06	3.00046e-06	2.68838e-06	3.97844e-06	3.03378e-06	2.06704e-06	2.58379e-06	1.33666e-06	2.01968e-06	2.62423e-06	1.48233e-06	9.89399e-07	1.63895e-06	2.37491e-06	1.62914e-06	2.26187e-06	2.11927e-06	1.33779e-06	1.26372e-06	1.40659e-06	2.05363e-06	1.63189e-06
Chromatiaceae	0.000329129	0.000318575	0.000345133	0.000329128	0.000302352	0.000300685	0.000322935	0.000319137	0.000316048	0.000330307	0.000337059	0.000322496	0.000326119	0.00028437	0.000323693	0.000323891	0.000282688	0.000298197	0.000278983	0.000287305	0.000287914	0.000245491	0.000273227	0.00031805
Chromobacteriaceae	0.000292821	0.000314062	0.000323104	0.00033644	0.000312107	0.000284548	0.000324759	0.000297398	0.000294963	0.000247928	0.000281961	0.000265667	0.000267255	0.000220837	0.000263769	0.000262796	0.000256764	0.000290257	0.000281033	0.000258314	0.000250019	0.000208218	0.000238569	0.000281465
Chroococcaceae	5.96619e-05	4.953e-05	5.21273e-05	5.39367e-05	5.46916e-05	5.45899e-05	5.03146e-05	4.72705e-05	4.75513e-05	4.89973e-05	5.97567e-05	5.31366e-05	5.76274e-05	5.45027e-05	5.22767e-05	5.5603e-05	5.42817e-05	5.59404e-05	4.86841e-05	5.46982e-05	5.50033e-05	5.20788e-05	5.58556e-05	6.62437e-05
Chroococcidiopsidaceae	5.41058e-05	5.14079e-05	5.61704e-05	6.19569e-05	6.09043e-05	5.81349e-05	6.0392e-05	5.3885e-05	5.99849e-05	5.37176e-05	6.33981e-05	6.38917e-05	5.73287e-05	5.03133e-05	6.90957e-05	5.36488e-05	5.37293e-05	4.79956e-05	5.25234e-05	5.67434e-05	6.3437e-05	5.35187e-05	5.8748e-05	6.87184e-05
Chrysiogenaceae	4.12007e-06	5.01867e-06	3.67789e-06	5.51905e-06	4.61764e-06	3.33733e-06	4.0657e-06	4.15149e-06	4.5707e-06	1.8131e-06	3.36773e-06	2.81874e-06	3.54032e-06	3.48388e-06	5.8606e-06	3.34053e-06	3.256e-06	3.25339e-06	2.34012e-06	2.38314e-06	1.49661e-06	2.59771e-06	2.8492e-06	4.06034e-06
Chthoniobacteraceae	0.000542106	0.00117246	0.000762561	0.000900981	0.00184284	0.00124985	0.00200456	0.00196747	0.00059372	0.000573934	0.000621405	0.000632822	0.000667567	0.000792822	0.000650621	0.000815305	0.000537157	0.000485787	0.000457601	0.000425336	0.00045022	0.000438412	0.000472004	0.000576569
Chthonomonadaceae	9.3469e-05	0.000159318	0.000114908	0.000178779	0.000239221	0.000272105	0.000273947	0.000242786	0.000115056	0.000128372	0.000117904	0.000127329	9.7595e-05	9.54139e-05	0.000128625	0.000114796	7.20581e-05	6.04275e-05	6.28754e-05	5.57896e-05	0.000111379	7.37995e-05	7.63266e-05	9.49538e-05
Chuviridae	0	0	0	0	0	0	0	0	0	1.1358e-06	0	0	0	0	0	0	0	0	0	0	0	0	0	0
Chytriomycetaceae	1.24686e-06	1.848e-06	2.52176e-06	9.02794e-07	3.40881e-06	1.73233e-06	1.63086e-06	2.23401e-06	3.05185e-06	4.78364e-06	3.60948e-06	5.13934e-06	3.62195e-06	1.13652e-05	2.30801e-06	2.66925e-06	4.63196e-06	7.95487e-06	4.83613e-06	9.11309e-06	1.4987e-06	1.35557e-05	9.05874e-06	4.40536e-06
Cladoniaceae	6.06957e-08	1.09556e-07	0	0	0	0	0	0	5.34662e-08	0	5.23375e-08	4.84429e-08	0	0	0	0	0	1.56716e-07	2.35303e-07	4.35868e-07	0	0	2.40434e-07	0
Cladosporiaceae	0	1.01129e-07	2.53533e-07	6.38337e-07	6.65631e-07	3.72805e-07	3.11325e-07	6.05004e-07	3.83786e-07	1.06846e-06	1.908e-07	6.05061e-07	4.4431e-07	8.20133e-07	4.60602e-07	2.06973e-07	0	0	6.39713e-07	6.6153e-07	3.12999e-07	8.81831e-07	1.01213e-06	1.37101e-06
Clavicipitaceae	1.86138e-06	1.60694e-06	2.56799e-06	4.38428e-07	1.75336e-06	8.4882e-07	1.93524e-06	1.14148e-06	4.42345e-06	4.22543e-06	4.47221e-06	1.4441e-06	1.97338e-06	3.20352e-06	2.82272e-06	2.72493e-06	1.22555e-06	1.00977e-06	2.39858e-06	2.88432e-06	9.63175e-07	2.11451e-06	1.97037e-06	6.2553e-07
Closteroviridae	0	0	0	0	0	0	0	0	7.69913e-08	7.79375e-08	0	6.97578e-08	0	1.35837e-07	0	2.91832e-07	0	0	0	0	0	3.34188e-07	1.73112e-07	9.60055e-08
Clostridiaceae	0.000129395	0.000140812	0.000144195	0.000151359	0.000129998	0.000143774	0.00013639	0.000130486	0.000139138	0.000151619	0.000143926	0.000142777	0.000154857	0.00015164	0.000160169	0.000161547	0.000116307	0.000126092	0.000132779	0.000118885	0.000143276	0.000132422	0.000132153	0.00013081
Clostridiales_Family_XII._Incertae_Sedis	1.80736e-06	2.86206e-06	1.18488e-06	2.64601e-06	3.39373e-06	2.42996e-06	3.02217e-06	2.73508e-06	1.57211e-06	2.21087e-06	1.06864e-06	2.13278e-06	1.76809e-06	2.35734e-06	2.82461e-06	1.53646e-06	1.9415e-06	3.5566e-06	2.1692e-06	7.63954e-07	1.00765e-06	1.64466e-06	1.19531e-06	8.2135e-07
Clostridiales_Family_XIII._Incertae_Sedis	1.58056e-06	9.15632e-07	2.1063e-06	2.42267e-06	5.22774e-07	1.63543e-06	7.408e-07	1.22794e-06	1.50971e-06	1.06057e-06	8.80542e-07	1.91947e-06	1.03442e-06	2.6855e-06	2.24234e-06	1.3642e-06	1.98644e-06	1.45032e-06	1.54502e-06	1.30722e-06	1.40097e-06	3.04143e-06	3.39162e-06	3.66185e-06
Clostridiales_Family_XVI._Incertae_Sedis	2.77655e-06	3.86413e-06	1.94587e-06	3.99322e-06	2.04542e-06	2.26873e-06	1.49017e-06	2.48505e-06	2.09957e-06	5.30444e-06	3.43544e-06	3.0635e-06	3.97618e-06	2.80365e-06	4.40764e-06	3.72391e-06	2.57256e-06	2.9569e-06	2.67326e-06	1.91709e-06	3.97884e-06	4.59346e-06	5.27823e-06	4.68393e-06
Clostridiales_Family_XVII._Incertae_Sedis	4.45261e-05	4.62987e-05	4.11411e-05	4.68586e-05	5.41397e-05	4.82801e-05	5.23476e-05	4.89545e-05	3.74102e-05	3.38522e-05	4.13863e-05	4.01913e-05	4.92719e-05	4.54474e-05	4.87828e-05	4.55697e-05	2.96355e-05	2.48425e-05	2.85826e-05	2.17315e-05	3.56169e-05	2.89241e-05	3.22268e-05	2.98476e-05
Coelosphaeriaceae	3.03699e-06	4.54418e-06	2.25602e-06	3.28556e-06	1.79066e-06	2.35732e-06	3.46676e-06	2.38432e-06	1.94942e-06	1.98937e-06	4.03874e-06	2.17821e-06	3.06951e-06	2.40905e-06	3.98427e-06	2.47346e-06	2.6759e-06	3.99113e-06	2.17869e-06	2.2355e-06	3.51308e-06	2.16757e-06	4.9793e-06	3.61913e-06
Cohaesibacteraceae	1.6708e-05	2.21631e-05	2.22256e-05	2.46337e-05	1.65096e-05	1.56276e-05	1.61306e-05	1.33842e-05	1.81966e-05	1.69192e-05	2.88247e-05	2.14126e-05	2.04336e-05	1.78272e-05	1.5163e-05	2.20048e-05	3.17924e-05	3.69629e-05	2.681e-05	2.64477e-05	1.60593e-05	1.6245e-05	1.9594e-05	2.80929e-05
Coleofasciculaceae	4.65049e-05	4.28989e-05	4.48131e-05	4.24119e-05	4.44654e-05	5.36162e-05	4.96286e-05	4.0234e-05	4.57905e-05	4.29246e-05	4.98554e-05	4.31092e-05	4.22054e-05	3.68267e-05	4.1994e-05	4.59993e-05	4.02632e-05	3.58038e-05	3.22068e-05	3.51295e-05	4.23346e-05	3.85811e-05	4.36805e-05	4.096e-05
Colwelliaceae	1.77496e-05	2.71099e-05	2.40072e-05	2.5117e-05	2.32075e-05	2.7952e-05	3.32139e-05	3.05163e-05	2.81215e-05	2.67488e-05	2.73467e-05	2.34483e-05	2.62545e-05	2.55794e-05	2.14015e-05	2.89003e-05	2.93297e-05	2.87665e-05	3.11152e-05	2.33081e-05	2.94206e-05	2.12177e-05	2.49275e-05	2.12281e-05
Comamonadaceae	0.0170497	0.0205167	0.0136243	0.0105651	0.0116664	0.0117429	0.00993596	0.0237894	0.0360018	0.00991887	0.0106147	0.0106565	0.00952691	0.00803259	0.00824137	0.00811762	0.0101443	0.0123094	0.0104523	0.0108202	0.0101891	0.00935271	0.0103409	0.0121001
Conexibacteraceae	0.000138933	0.000162897	0.000159958	0.000167935	0.00021537	0.000202772	0.000206297	0.000201214	0.000229824	0.000229958	0.000230385	0.000231888	0.000241023	0.000210187	0.000298697	0.000244408	0.000299673	0.000266575	0.000354731	0.000292734	0.000254993	0.000309744	0.000291209	0.000300954
Coniochaetaceae	8.07048e-07	1.56874e-06	3.28952e-07	1.06311e-06	9.28438e-07	1.18749e-06	3.52036e-06	1.68522e-06	3.44737e-07	1.43296e-06	3.74278e-06	1.50155e-06	8.54171e-07	7.66284e-07	4.58964e-07	2.37433e-06	6.56529e-07	1.14279e-06	1.20198e-06	4.71358e-07	1.19034e-06	3.22252e-07	7.07491e-07	1.55813e-06
Coniophoraceae	1.12054e-07	1.01129e-07	0	3.01662e-07	0	0	0	0	3.29963e-07	9.99199e-08	3.46803e-07	4.62071e-07	4.71429e-07	3.68384e-07	6.70831e-07	1.87072e-07	2.70539e-07	4.63708e-07	0	6.75828e-07	1.22567e-07	0	1.1857e-07	5.05562e-07
Coniothyriaceae	0	0	0	0	0	9.89482e-08	0	0	2.13865e-07	1.9984e-07	0	0	1.35432e-07	3.77324e-07	9.2135e-08	5.01542e-07	7.98313e-08	0	0	8.57445e-08	0	0	0	0
Coprothermobacteraceae	3.00614e-06	2.53828e-06	3.29544e-06	1.04177e-06	2.45677e-06	1.56773e-06	2.67139e-06	1.97042e-06	1.56317e-06	2.56034e-06	3.02697e-06	2.57189e-06	2.27945e-06	2.0318e-06	2.25262e-06	3.42235e-06	8.66247e-07	1.2891e-06	1.89335e-06	7.71971e-07	1.71792e-06	1.63926e-06	1.69131e-06	1.74933e-06
Cordycipitaceae	7.74468e-07	2.03966e-06	2.57926e-06	1.38279e-06	1.88612e-06	1.82485e-06	1.10639e-06	1.68557e-06	1.1061e-06	7.1773e-07	1.26715e-06	5.35334e-07	5.8679e-07	3.29921e-07	7.4071e-07	9.40242e-07	7.01875e-07	6.37965e-07	6.1815e-07	1.97477e-06	6.48884e-07	2.53522e-06	9.8117e-07	5.43322e-07
Coriobacteriaceae	2.27318e-05	2.38204e-05	1.98091e-05	2.74763e-05	2.13688e-05	2.21445e-05	2.0321e-05	2.05177e-05	2.03612e-05	2.66389e-05	2.70554e-05	2.34938e-05	2.23723e-05	1.92485e-05	1.97787e-05	2.1647e-05	2.42779e-05	2.48657e-05	3.36131e-05	2.85319e-05	2.28338e-05	2.21429e-05	2.29942e-05	2.47927e-05
Corticiaceae	0	0	0	0	0	0	0	0	0	0	0	0	0	0	0	0	0	2.1616e-07	0	0	7.77667e-07	8.96288e-07	1.9898e-07	2.57486e-07
Cortinariaceae	5.11401e-07	2.56286e-06	1.19506e-06	2.94213e-07	8.07035e-07	3.6928e-07	2.15558e-07	4.05572e-07	4.17593e-07	1.06404e-06	1.34565e-06	1.67928e-06	6.20191e-07	2.64363e-06	1.93263e-06	2.40521e-07	1.54391e-06	2.48414e-06	1.0487e-06	1.55889e-06	1.46151e-06	2.82482e-06	1.46484e-06	1.18961e-06
Corynebacteriaceae	2.27354e-05	2.9264e-05	2.86406e-05	2.76807e-05	3.12159e-05	3.71904e-05	3.3711e-05	3.26426e-05	3.10559e-05	2.88414e-05	2.96083e-05	2.79453e-05	2.84703e-05	2.75354e-05	2.53098e-05	3.11151e-05	2.93161e-05	3.11305e-05	2.80554e-05	2.23695e-05	2.79621e-05	2.40935e-05	2.46885e-05	2.76729e-05
Corynesporascaceae	0	1.73363e-07	2.94325e-07	1.62847e-07	0	0	0	4.90635e-08	2.22678e-07	1.08247e-07	5.28333e-07	2.17169e-07	2.8325e-07	6.06639e-07	4.87087e-07	4.69497e-07	0	1.09549e-07	0	0	3.42712e-07	4.10904e-07	0	3.72837e-07
Coxiellaceae	1.82012e-05	3.32339e-05	2.79047e-05	3.85556e-05	3.10865e-05	2.99311e-05	2.67051e-05	2.62691e-05	3.76571e-05	6.57231e-05	4.6656e-05	5.82316e-05	4.88686e-05	3.63892e-05	3.61985e-05	4.62427e-05	2.14723e-05	1.62595e-05	2.12337e-05	1.48836e-05	1.70183e-05	1.5124e-05	1.45719e-05	1.87448e-05
Crenotrichaceae	1.29912e-05	2.15247e-05	1.61596e-05	1.57925e-05	1.33127e-05	1.12864e-05	2.08836e-05	1.70958e-05	1.34744e-05	1.7105e-05	1.49843e-05	1.50804e-05	1.64826e-05	1.11723e-05	1.75142e-05	1.40929e-05	1.50793e-05	1.66136e-05	1.50514e-05	1.20513e-05	1.05868e-05	8.26271e-06	1.46813e-05	1.52501e-05
Criblamydiaceae	1.13666e-06	1.87559e-06	1.65087e-06	1.50386e-06	2.97482e-06	2.12739e-06	1.83058e-06	7.1771e-07	1.92268e-06	2.82794e-06	1.21773e-06	2.22691e-06	5.0712e-06	4.99539e-06	3.62501e-06	3.37147e-06	2.01241e-06	9.43221e-07	1.43016e-06	2.00239e-06	1.06564e-06	1.10379e-06	7.35011e-07	3.99267e-07
Crocinitomicaceae	3.78805e-05	4.57644e-05	5.00471e-05	5.37231e-05	3.77935e-05	4.19701e-05	4.18117e-05	3.71141e-05	4.64354e-05	5.60502e-05	5.21213e-05	5.73135e-05	4.77831e-05	4.31238e-05	5.38852e-05	5.23531e-05	4.39226e-05	4.70306e-05	4.91276e-05	4.25335e-05	0.000146907	3.80697e-05	3.16486e-05	6.32083e-05
Cruciviridae	0	0	0	0	0	0	0	0	0	3.64089e-07	0	0	0	0	0	0	0	0	0	0	0	0	0	0
Cryomorphaceae	1.22429e-05	1.77108e-05	1.23413e-05	2.18965e-05	1.21712e-05	1.17552e-05	1.25597e-05	1.09089e-05	2.02169e-05	1.8851e-05	1.89158e-05	1.85009e-05	1.48547e-05	1.50542e-05	2.02928e-05	2.11994e-05	1.73393e-05	1.5804e-05	1.32713e-05	1.16916e-05	2.73059e-05	1.2324e-05	1.22233e-05	1.5123e-05
Cryphonectriaceae	6.83628e-07	8.69829e-07	7.23906e-08	7.31e-07	1.07232e-06	4.46708e-07	1.23221e-06	6.17569e-07	2.84212e-07	2.27002e-07	3.37838e-07	1.92542e-07	3.83595e-07	9.09165e-07	1.08409e-07	1.31363e-06	6.70744e-07	7.93072e-07	2.50838e-07	1.4248e-06	4.36593e-07	5.69721e-07	3.24586e-07	3.39377e-07
Cryptobasidiaceae	0	4.0245e-07	8.77204e-08	2.93838e-07	2.95332e-07	1.77703e-07	2.18805e-07	1.43546e-07	1.92599e-07	5.50533e-07	1.73255e-07	4.10158e-07	1.8761e-07	4.86595e-07	0	0	0	8.31832e-07	3.95576e-07	3.77421e-07	0	1.25862e-06	1.10969e-07	0
Cryptococcaceae	0.00065225	0.000653318	0.000559906	0.000605395	0.000614796	0.000621768	0.000565716	0.000646148	0.000670561	0.000732862	0.0006475	0.000614289	0.000716157	0.00065	0.000593295	0.000726716	3.3399e-06	5.11575e-06	4.97623e-06	6.51085e-06	3.10908e-06	1.24272e-05	6.73172e-06	5.60601e-06
Cryptosporangiaceae	8.87222e-05	0.000104771	0.00011769	9.76924e-05	0.000152502	0.00015767	0.000170401	0.000164235	9.05031e-05	9.55099e-05	0.000113735	8.22726e-05	9.50954e-05	9.15178e-05	9.06899e-05	9.62371e-05	8.82343e-05	0.000104059	8.57574e-05	7.63051e-05	8.2463e-05	5.78825e-05	8.30381e-05	6.88592e-05
Cucurbitariaceae	0	3.24166e-07	0	0	7.56157e-08	8.57551e-08	1.15763e-06	3.3162e-07	2.7014e-07	6.88971e-07	1.6748e-07	1.53314e-07	4.38261e-07	0	3.73326e-07	0	4.11525e-07	0	0	0	0	3.13301e-07	0	0
Cuniculiplasmataceae	4.77888e-07	7.2643e-07	2.95296e-07	2.99267e-07	6.73803e-08	3.82077e-07	1.54404e-07	1.48568e-07	0	3.48974e-07	7.46198e-08	1.38134e-07	0	2.50222e-07	0	4.35571e-07	0	0	0	0	0	0	8.56992e-08	2.85165e-07
Cuniculitremaceae	0	0	4.98044e-07	5.09215e-07	6.18674e-08	0	3.80527e-07	2.7931e-07	1.81156e-07	1.02549e-07	3.09723e-07	1.09309e-07	2.23294e-07	2.12781e-07	2.53642e-07	1.33832e-07	2.03122e-07	2.05156e-07	4.56928e-07	1.03869e-06	0	1.78472e-06	7.5464e-07	1.12948e-07
Cunninghamellaceae	1.02355e-06	1.59947e-06	2.91063e-06	5.97447e-07	3.60083e-06	8.51066e-07	1.59873e-06	5.02006e-06	9.06965e-06	1.1879e-05	5.99461e-06	1.26361e-05	6.44279e-06	2.45124e-05	6.79199e-06	5.63679e-06	1.24997e-05	1.33324e-05	1.9569e-05	2.84472e-05	1.0338e-05	4.42283e-05	2.46916e-05	9.00786e-06
Cyanobacteriaceae	1.03602e-06	1.65209e-06	1.91308e-06	2.77383e-06	1.41387e-06	3.41993e-06	1.74866e-06	2.04582e-06	3.50118e-06	1.68063e-06	1.49351e-06	2.03827e-06	1.84984e-06	1.99567e-06	1.31862e-06	2.01782e-06	2.19897e-06	2.52145e-06	8.74523e-07	1.78738e-06	2.77775e-06	8.22705e-07	5.28571e-07	3.54725e-07
Cyanothecaceae	3.51107e-05	3.85941e-05	3.94964e-05	3.82488e-05	3.59986e-05	3.56004e-05	3.84398e-05	3.67329e-05	3.94038e-05	3.85914e-05	3.89962e-05	4.27139e-05	3.91041e-05	3.45121e-05	4.34214e-05	3.8614e-05	4.47349e-05	4.04107e-05	3.99597e-05	4.32221e-05	4.02587e-05	3.12235e-05	2.98754e-05	3.98644e-05
Cyclobacteriaceae	0.00023458	0.000381347	0.00033959	0.000295647	0.000298137	0.000264945	0.000387081	0.000264338	0.000335566	0.000555892	0.000307995	0.000333612	0.000303521	0.000320302	0.000295774	0.000302369	0.000321065	0.000297149	0.000337284	0.000259465	0.000299998	0.000212604	0.000208076	0.000235619
Cylindrosympodiaceae	0	7.00902e-07	0	1.07348e-07	0	4.41026e-07	5.99801e-07	2.88564e-07	1.09988e-07	0	2.15331e-07	9.96539e-08	0	0	2.91346e-07	0	1.39135e-07	7.05223e-07	0	4.29897e-07	0	2.38705e-07	0	0
Cyphellophoraceae	0	0	2.90503e-07	0	2.95887e-07	0	0	5.03612e-07	0	0	0	0	0	0	0	3.8399e-07	1.43227e-07	6.6374e-07	0	0	0	0	0	0
Cytophagaceae	0.000852336	0.000887689	0.00113184	0.00093995	0.000883855	0.000939217	0.000970557	0.000851935	0.0010123	0.00117984	0.000999058	0.00108289	0.00106535	0.00113813	0.00107454	0.00105847	0.0011676	0.00112856	0.00117908	0.00121082	0.00125903	0.00120151	0.00106502	0.00105178
Dacrymycetaceae	4.29275e-07	1.01694e-06	1.98962e-06	1.27818e-06	2.17612e-06	1.39463e-06	3.69389e-07	1.77547e-06	4.09129e-06	5.95841e-06	3.14033e-06	5.31209e-06	4.07591e-06	1.19018e-05	3.09725e-06	2.70983e-06	5.65132e-06	6.68441e-06	6.37933e-06	1.20513e-05	3.61683e-06	2.03092e-05	1.21453e-05	5.2053e-06
Dacryobolaceae	2.39457e-07	0	0	0	1.26422e-07	1.05725e-07	0	8.32603e-07	0	0	2.52623e-07	0	0	5.58233e-07	0	3.03992e-07	9.50187e-08	5.50418e-08	0	0	4.73527e-07	3.26037e-07	1.6889e-07	1.87328e-07
Debaryomycetaceae	2.5746e-06	2.64975e-06	2.11593e-06	1.63824e-06	2.44349e-06	3.09402e-06	2.05635e-06	3.20043e-06	1.95767e-06	3.86304e-06	1.72735e-06	3.89023e-06	2.48343e-06	5.93376e-06	2.55263e-06	2.64254e-06	3.31923e-06	2.94927e-06	3.89126e-06	6.29648e-06	1.26619e-06	1.34319e-05	6.44826e-06	2.36671e-06
Deferribacteraceae	8.02705e-06	9.58779e-06	9.45579e-06	8.01794e-06	5.07315e-06	8.13945e-06	6.77886e-06	7.66633e-06	8.28387e-06	7.75511e-06	7.79211e-06	9.15496e-06	8.09267e-06	5.97145e-06	1.00903e-05	9.72391e-06	6.55327e-06	1.02118e-05	6.75699e-06	7.0004e-06	7.25311e-06	5.21338e-06	6.1559e-06	1.01816e-05
Defluviitaleaceae	1.50107e-07	5.15877e-07	6.84058e-08	2.28018e-07	3.11175e-07	4.4285e-07	6.23793e-08	1.56896e-07	5.37685e-07	3.15087e-07	7.92041e-07	9.30103e-08	5.60327e-08	0	3.20427e-07	3.35423e-07	6.06138e-07	1.03519e-07	3.32329e-07	3.09457e-07	2.13172e-07	1.53297e-07	1.19114e-07	4.76504e-08
Dehalococcoidaceae	6.30285e-06	6.07364e-06	6.58955e-06	5.55891e-06	4.43508e-06	6.87284e-06	3.88207e-06	4.46954e-06	4.34575e-06	5.33937e-06	5.61943e-06	5.80795e-06	6.30354e-06	4.96917e-06	7.5142e-06	5.36697e-06	5.7803e-06	3.52978e-06	6.79266e-06	2.50786e-06	4.06335e-06	3.29618e-06	6.30076e-06	5.83561e-06
Deinococcaceae	0.000233608	0.000246862	0.000240124	0.000243849	0.000252671	0.000237568	0.000250428	0.000215973	0.000244676	0.000240621	0.000262008	0.000241261	0.000245634	0.000237371	0.000277106	0.000256625	0.000212284	0.000215707	0.000207675	0.000188957	0.000221528	0.000179791	0.000224437	0.000233773
Delitschiaceae	8.44033e-08	2.92149e-08	0	1.94593e-07	2.52052e-08	0	5.69154e-08	5.55753e-08	0	3.07901e-07	0	7.77102e-08	2.59411e-08	3.61709e-07	5.35608e-07	5.47071e-07	7.21438e-08	5.96454e-07	8.36633e-08	1.54975e-07	0	7.11696e-07	1.70975e-07	1.06673e-07
Demequinaceae	1.14873e-05	1.23369e-05	1.68699e-05	2.00858e-05	1.76068e-05	1.70531e-05	1.94111e-05	1.74613e-05	1.30978e-05	1.31327e-05	1.08611e-05	1.46799e-05	1.75341e-05	1.4986e-05	1.58595e-05	1.6188e-05	1.82738e-05	1.81562e-05	1.37607e-05	9.97258e-06	1.07953e-05	1.25946e-05	1.82071e-05	1.22187e-05
Demerecviridae	0	5.58994e-07	0	6.25493e-08	5.66403e-08	0	8.76114e-08	0	1.96495e-07	1.59742e-06	2.11702e-07	3.20391e-07	6.15276e-07	5.3479e-08	1.13174e-07	1.04226e-07	3.47836e-07	5.05235e-07	0	9.04562e-07	3.15172e-07	2.81672e-07	1.2998e-07	9.6459e-08
Dermabacteraceae	6.35006e-06	9.55264e-06	1.01046e-05	1.0741e-05	9.78378e-06	9.03574e-06	1.14566e-05	8.1448e-06	9.06529e-06	1.19018e-05	8.6012e-06	8.71356e-06	9.94594e-06	1.68057e-05	8.097e-06	1.06074e-05	4.54069e-06	9.68648e-06	9.09189e-06	6.21153e-06	7.32123e-06	8.63332e-06	7.20981e-06	1.24224e-05
Dermacoccaceae	4.29718e-05	5.092e-05	9.65844e-05	5.59226e-05	6.44898e-05	7.2978e-05	8.03306e-05	8.17889e-05	4.3912e-05	5.04026e-05	4.62568e-05	3.91035e-05	5.26827e-05	5.34894e-05	5.20315e-05	5.04904e-05	4.04721e-05	4.60467e-05	4.18959e-05	4.48929e-05	4.53549e-05	4.63854e-05	5.55583e-05	5.91129e-05
Dermateaceae	4.01439e-07	7.19652e-07	1.76132e-07	6.28156e-07	1.04171e-07	1.21543e-07	5.44627e-07	5.0971e-07	5.12669e-07	2.38191e-07	1.81605e-07	9.49934e-07	3.89174e-07	1.71229e-06	1.53702e-07	6.53193e-07	6.38355e-07	9.24716e-07	3.05258e-07	8.07015e-07	1.19254e-07	1.01696e-06	6.04145e-07	8.42583e-07
Dermatophilaceae	1.53438e-05	2.14411e-05	2.80933e-05	2.18544e-05	2.66962e-05	3.19021e-05	2.85669e-05	3.14921e-05	1.90536e-05	2.11057e-05	2.28897e-05	2.56701e-05	2.31245e-05	2.18292e-05	2.77976e-05	2.45815e-05	2.4269e-05	2.42469e-05	2.40449e-05	2.41665e-05	2.16725e-05	2.13664e-05	3.31739e-05	2.60501e-05
Dermocarpellaceae	7.2551e-06	7.39906e-06	9.84348e-06	1.0084e-05	9.13933e-06	1.17873e-05	8.55213e-06	7.8831e-06	8.62097e-06	6.09273e-06	9.48535e-06	7.92538e-06	8.24229e-06	9.69102e-06	8.42234e-06	9.3887e-06	8.47773e-06	6.54471e-06	9.67993e-06	4.72949e-06	1.15212e-05	1.09748e-05	7.94922e-06	7.82623e-06
Desertifilaceae	2.19793e-05	2.63254e-05	2.28788e-05	2.33987e-05	2.15919e-05	2.36113e-05	2.40103e-05	2.10057e-05	1.92702e-05	2.1339e-05	2.12981e-05	2.29224e-05	2.04159e-05	2.17501e-05	2.45905e-05	1.99875e-05	1.85462e-05	1.91652e-05	2.11778e-05	1.77778e-05	1.92662e-05	1.97207e-05	1.91947e-05	1.84774e-05
Desulfarculaceae	1.08737e-05	1.13295e-05	1.28331e-05	1.41152e-05	1.72917e-05	1.62638e-05	1.5078e-05	1.18955e-05	1.23515e-05	1.16897e-05	1.79602e-05	1.26188e-05	1.27776e-05	1.11662e-05	1.48019e-05	1.36079e-05	1.80898e-05	2.00486e-05	2.13327e-05	1.6767e-05	1.5991e-05	1.02273e-05	1.20944e-05	1.42779e-05
Desulfobacteraceae	0.000405431	0.000415422	0.000408892	0.000475411	0.000384524	0.000392214	0.000394317	0.000383894	0.000401124	0.000404813	0.000441359	0.000405372	0.000425645	0.000359254	0.000432498	0.00041944	0.000387497	0.000383005	0.000424756	0.000356556	0.000383612	0.00031939	0.000372461	0.000396724
Desulfobulbaceae	0.000159909	0.000155642	0.000162958	0.000167418	0.000152148	0.000148967	0.00015153	0.000150669	0.000171992	0.000169745	0.000185934	0.000160761	0.00017049	0.000133631	0.000164141	0.000172369	0.000175231	0.000155507	0.000188962	0.000161842	0.000170345	0.000137041	0.000149602	0.00015555
Desulfohalobiaceae	2.27801e-05	2.32904e-05	2.34761e-05	2.12297e-05	2.08316e-05	2.49343e-05	1.93601e-05	1.85351e-05	2.0714e-05	1.96597e-05	1.96652e-05	1.89822e-05	1.9975e-05	2.00102e-05	2.15591e-05	1.79919e-05	1.99059e-05	1.89433e-05	1.6873e-05	2.22546e-05	2.44619e-05	2.06783e-05	1.98899e-05	2.27734e-05
Desulfomicrobiaceae	8.86298e-06	7.79994e-06	1.19707e-05	1.14675e-05	1.20636e-05	8.37909e-06	1.05316e-05	1.0803e-05	1.07016e-05	1.26356e-05	1.35826e-05	1.20261e-05	9.87102e-06	8.94744e-06	1.24517e-05	1.06195e-05	1.27814e-05	1.13032e-05	1.02151e-05	1.3091e-05	1.0058e-05	9.31292e-06	1.12568e-05	1.46011e-05
Desulfonatronaceae	1.29367e-05	1.39224e-05	1.46388e-05	1.56506e-05	1.51063e-05	1.88665e-05	1.55119e-05	1.3828e-05	1.29184e-05	1.55096e-05	1.31537e-05	1.36003e-05	1.39864e-05	1.52656e-05	1.61867e-05	1.5111e-05	1.28816e-05	1.48268e-05	1.65273e-05	1.3703e-05	1.22667e-05	1.32251e-05	1.12054e-05	1.19589e-05
Desulfovibrionaceae	0.000141843	0.000155943	0.000162368	0.000157857	0.000162095	0.000152956	0.000162517	0.000154414	0.000143652	0.000144374	0.000140887	0.000144845	0.000162051	0.000145783	0.000160772	0.000156988	0.000128346	0.00014253	0.000133472	0.000129983	0.000129077	0.000116575	0.000123652	0.000123073
Desulfurellaceae	1.85759e-06	1.68119e-06	1.23895e-06	1.33356e-06	1.66604e-06	2.61818e-06	2.12551e-06	2.07508e-06	1.41823e-06	2.19273e-06	2.36817e-06	1.70418e-06	2.91022e-06	2.45345e-06	1.96333e-06	2.6819e-06	2.41516e-06	2.76536e-06	3.02511e-06	2.23322e-06	2.7542e-06	1.92458e-06	2.90692e-06	1.83143e-06
Desulfurobacteriaceae	6.33894e-06	3.53301e-06	5.17373e-06	6.9422e-06	4.92402e-06	5.36863e-06	5.39817e-06	3.80212e-06	2.80365e-06	5.24358e-06	4.77734e-06	3.7011e-06	5.0954e-06	5.18939e-06	5.10771e-06	5.93841e-06	6.13639e-06	3.41708e-06	7.025e-06	4.45355e-06	6.48164e-06	3.87621e-06	5.56299e-06	6.34033e-06
Desulfurococcaceae	9.75439e-07	2.12276e-06	7.21112e-07	8.7409e-07	1.37066e-06	9.96673e-07	1.52274e-06	1.73787e-06	1.92515e-06	1.32886e-06	1.24261e-06	9.89531e-07	1.03718e-06	5.91031e-07	1.45244e-06	9.46077e-07	1.88635e-06	3.01754e-07	1.03769e-06	1.03936e-06	3.8602e-07	2.38754e-07	5.0997e-07	5.28863e-07
Desulfuromonadaceae	0.000123549	0.000126041	0.000127293	0.000131631	0.000111526	0.00011203	0.000119758	0.000111961	0.000113515	0.000117344	0.00012501	0.000116319	0.000125935	0.000102757	0.000124896	0.000129037	0.00011597	0.000106498	0.000113525	9.17723e-05	0.000107881	8.65572e-05	9.73817e-05	0.000108636
Diademaceae	0	0	0	0	0	0	5.46134e-07	0	0	0	0	7.39384e-07	0	0	9.84457e-08	0	0	4.63708e-07	1.41182e-07	0	0	0	0	0
Diaporthaceae	7.94562e-08	1.11348e-07	2.3288e-07	3.97353e-07	4.32667e-07	7.42111e-08	3.52647e-07	8.2416e-07	8.71447e-07	5.12167e-07	7.92073e-07	1.30858e-06	5.833e-07	1.39034e-06	2.2509e-07	8.46064e-07	1.7619e-06	1.8385e-06	3.36823e-06	1.29021e-06	8.6851e-07	1.9813e-06	3.08424e-06	9.28347e-07
Diatrypaceae	8.91855e-08	0	0	0	0	7.08792e-07	2.0253e-07	0	3.44737e-07	2.88657e-07	7.19124e-07	3.07755e-07	5.60327e-07	7.71994e-07	0	2.23341e-07	0	0	1.50594e-07	1.39478e-07	3.43824e-07	3.21334e-07	8.61078e-07	0
Dictyobacteraceae	0.000416049	0.000636499	0.000306403	0.000631604	0.000617715	0.000714206	0.000994464	0.000633994	0.00030205	0.000375668	0.00031399	0.000311046	0.000577328	0.000679561	0.000520945	0.000563444	0.000135128	0.000119984	0.000115897	0.000124799	0.000198463	0.000149505	0.000180446	0.000180961
Dictyoglomaceae	4.29183e-06	4.79104e-06	4.64095e-06	5.26392e-06	4.31104e-06	5.32073e-06	4.98075e-06	4.6429e-06	5.60349e-06	5.89748e-06	6.24641e-06	4.68987e-06	5.53631e-06	5.15517e-06	5.01868e-06	4.99432e-06	1.51837e-06	2.52633e-06	4.52932e-06	2.14401e-06	2.57474e-06	2.34734e-06	3.02183e-06	4.15488e-06
Didymellaceae	1.22669e-06	8.85673e-07	1.49138e-06	1.32718e-06	1.82392e-06	1.18816e-06	5.48932e-05	2.02701e-06	1.21336e-06	6.80889e-07	1.17569e-06	4.42211e-07	1.47353e-06	1.37643e-06	1.76375e-06	1.03446e-06	3.38762e-07	1.06449e-07	1.96427e-07	1.90357e-06	1.03821e-07	1.24667e-06	8.2538e-07	3.19991e-07
Didymosphaeriaceae	1.6331e-06	1.02911e-06	1.39248e-06	2.11877e-06	1.91567e-06	2.84871e-06	2.66139e-06	2.93667e-06	1.41819e-06	1.81082e-06	1.51103e-06	2.39372e-06	1.44702e-06	2.23156e-06	2.11799e-06	1.6739e-06	2.85144e-07	7.27295e-07	1.05556e-07	6.32951e-07	5.76644e-07	2.7479e-06	3.49916e-07	2.08085e-07
Dietziaceae	4.07099e-06	6.75651e-06	4.62797e-06	6.43912e-06	8.77695e-06	9.70017e-06	8.96905e-06	7.48302e-06	7.30294e-06	8.82951e-06	7.00878e-06	7.66811e-06	6.1031e-06	5.36315e-06	7.17892e-06	7.15405e-06	5.15618e-06	4.17492e-06	5.45814e-06	4.25006e-06	6.97996e-06	4.82099e-06	4.79419e-06	1.02336e-05
Dimargaritaceae	8.91855e-08	1.94766e-07	2.33007e-07	4.12663e-07	3.40367e-07	0	2.88793e-07	1.1244e-06	1.79094e-06	1.91352e-06	1.13505e-06	1.51308e-06	9.43504e-07	3.02251e-06	9.59312e-07	6.72106e-07	1.41598e-06	2.22174e-06	3.11834e-06	2.56219e-06	1.77075e-06	6.08089e-06	3.46393e-06	2.56503e-06
Dipodascaceae	1.84173e-06	9.58702e-07	5.50469e-07	3.09497e-07	1.85608e-06	1.10735e-06	8.32929e-07	3.63973e-06	2.64959e-06	3.31543e-06	1.06096e-06	5.45232e-06	3.4044e-06	1.28472e-05	1.59356e-06	1.94006e-06	7.36194e-06	7.55572e-06	8.64837e-06	1.24235e-05	2.69673e-06	2.03181e-05	1.13419e-05	4.68933e-06
Dissoconiaceae	0	0	0	0	0	0	0	0	0	1.16325e-07	0	0	3.63849e-07	0	0	0	0	0	5.30701e-07	3.12264e-07	0	6.23484e-07	5.09154e-07	0
Dissulfurirhabdaceae	6.1665e-06	5.88049e-06	1.0802e-05	8.38263e-06	7.6315e-06	4.50336e-06	6.93622e-06	7.92297e-06	8.32268e-06	7.98456e-06	7.18564e-06	6.83527e-06	7.55107e-06	7.60647e-06	9.5627e-06	8.33543e-06	6.66958e-06	7.92662e-06	3.92405e-06	6.40881e-06	5.70513e-06	4.02068e-06	6.43177e-06	5.3467e-06
Diversisporaceae	1.70104e-05	5.91975e-05	2.86636e-05	3.30059e-05	3.58609e-05	1.42304e-05	1.98147e-05	2.53706e-05	2.5671e-05	2.35792e-05	1.07808e-05	1.60117e-05	9.38666e-06	1.49467e-05	7.90138e-06	2.36765e-05	1.93381e-05	6.54899e-06	2.81399e-05	1.41362e-05	7.68791e-06	4.1385e-05	2.23515e-05	8.52278e-06
Dothidotthiaceae	0	0	0	4.2254e-07	0	0	0	0	0	0	0	1.48421e-07	0	0	0	0	1.03611e-07	0	0	2.22571e-07	0	0	0	2.04267e-07
Dothioraceae	8.01851e-08	0	0	5.67411e-07	0	0	0	3.70525e-07	0	0	0	1.90531e-07	2.82569e-07	3.48299e-07	2.63726e-07	3.74144e-07	1.78705e-07	0	4.91067e-07	9.59709e-08	0	5.16544e-07	0	0
Drexlerviridae	0	7.67637e-07	0	0	0	0	0	0	0	0	0	0	0	0	0	0	0	0	0	0	0	0	0	0
Dubosqiidae	0	0	3.47721e-07	0	4.69939e-07	0	0	0	0	3.15963e-07	0	2.0517e-07	4.12005e-07	7.73112e-07	0	6.45647e-08	0	7.86387e-07	0	2.05114e-07	0	4.39967e-07	2.08511e-07	0
Dysgonomonadaceae	1.61367e-05	1.25658e-05	1.9024e-05	1.58669e-05	1.34746e-05	1.65543e-05	1.60399e-05	1.95846e-05	1.5563e-05	1.93938e-05	1.42416e-05	1.62829e-05	1.67655e-05	1.29642e-05	2.21328e-05	1.89034e-05	2.14015e-05	1.68492e-05	1.43447e-05	1.98909e-05	3.45818e-05	1.29783e-05	1.02383e-05	1.57917e-05
Ectothiorhodospiraceae	0.000322218	0.000331216	0.000334694	0.000339604	0.000295675	0.000289522	0.000327598	0.000318028	0.000351974	0.000341606	0.000366895	0.000345448	0.000342783	0.000299524	0.000342852	0.000361504	0.000341367	0.000293021	0.00028951	0.00029388	0.000273157	0.000236582	0.000268339	0.00028494
Eggerthellaceae	3.85023e-06	5.29879e-06	3.90883e-06	5.64815e-06	3.26336e-06	7.76613e-06	8.76825e-06	2.82092e-06	7.21763e-06	4.77391e-06	5.71917e-06	6.78888e-06	5.4109e-06	8.51882e-06	6.07964e-06	5.50952e-06	6.24107e-06	6.46722e-06	4.42237e-06	3.60859e-06	6.7261e-06	3.93175e-06	4.59339e-06	3.80659e-06
Egibacteraceae	1.24327e-05	1.38514e-05	1.08063e-05	1.45173e-05	1.26366e-05	1.64552e-05	1.8016e-05	1.3581e-05	1.81619e-05	1.85435e-05	2.01909e-05	1.71025e-05	1.66007e-05	1.5286e-05	1.40652e-05	1.70984e-05	2.59181e-05	2.83267e-05	2.08495e-05	2.00092e-05	1.23673e-05	1.43213e-05	1.80019e-05	1.41896e-05
Egicoccaceae	8.72989e-06	1.19392e-05	1.02076e-05	1.27357e-05	1.21415e-05	1.54147e-05	1.761e-05	1.63438e-05	1.18251e-05	1.45866e-05	1.42259e-05	1.31269e-05	1.29822e-05	1.15107e-05	1.55399e-05	1.44677e-05	1.71514e-05	1.20018e-05	1.69044e-05	1.24751e-05	8.77804e-06	7.13554e-06	9.66125e-06	1.01691e-05
Elaphomycetaceae	0	3.19785e-07	6.22341e-07	2.14696e-07	1.8393e-07	7.20287e-07	4.01472e-07	1.80363e-07	2.65487e-07	4.70682e-07	1.00644e-06	0	3.89116e-07	3.54486e-07	2.26943e-07	3.91025e-07	3.79458e-07	3.67245e-07	0	0	2.03203e-07	8.79441e-08	4.94139e-07	0
Elioraeaceae	5.34421e-05	5.61618e-05	5.42544e-05	5.12139e-05	4.55627e-05	4.60193e-05	4.50449e-05	4.72208e-05	4.48474e-05	4.41281e-05	5.59698e-05	4.02402e-05	5.03648e-05	4.81688e-05	4.5586e-05	4.79996e-05	5.88369e-05	6.35371e-05	5.83966e-05	5.27291e-05	4.9073e-05	3.8903e-05	4.53664e-05	5.24307e-05
Elsinoaceae	0	0	0	1.58875e-07	4.53694e-08	1.98972e-07	7.05062e-07	4.26865e-07	9.80879e-08	3.16836e-07	7.73289e-07	6.93159e-07	3.71098e-07	1.78383e-06	6.81557e-07	5.12383e-07	3.95868e-07	6.48481e-08	5.34644e-07	9.9798e-07	1.3931e-07	2.72378e-06	8.61807e-07	1.3536e-06
Elusimicrobiaceae	0	5.70665e-07	1.84105e-07	0	0	5.28448e-07	0	1.02776e-07	3.42677e-07	9.98575e-07	5.58899e-07	1.77512e-06	9.01343e-07	3.20904e-07	1.722e-06	1.35106e-06	1.02817e-06	5.40974e-07	9.73099e-07	7.00439e-07	8.83806e-07	1.38396e-06	5.80749e-07	5.44874e-07
Emcibacteraceae	2.26033e-05	1.62381e-05	2.00275e-05	2.52844e-05	1.89734e-05	1.42848e-05	3.41623e-05	2.60214e-05	1.028e-05	1.25167e-05	1.85517e-05	1.32242e-05	1.27301e-05	1.48822e-05	1.54433e-05	1.80733e-05	1.58644e-05	1.42537e-05	2.09715e-05	1.64975e-05	1.49592e-05	1.00687e-05	1.41689e-05	1.69149e-05
Endogonaceae	6.756e-06	6.15807e-06	8.69405e-06	5.08671e-06	8.17941e-06	6.59551e-06	5.65267e-06	6.96283e-06	7.3911e-06	1.06809e-05	6.1382e-06	1.10441e-05	8.40439e-06	1.40039e-05	5.99327e-06	7.28278e-06	6.151e-06	6.56447e-06	9.542e-06	1.21936e-05	2.56525e-06	2.18527e-05	1.30543e-05	5.75343e-06
Endomicrobiaceae	1.07903e-07	0	3.0228e-07	6.73441e-07	0	3.007e-07	7.15247e-07	3.89749e-07	5.47118e-07	1.30243e-06	8.1461e-07	1.45762e-06	3.18399e-06	2.04174e-07	2.14014e-06	1.44946e-06	2.64569e-06	2.48445e-06	2.16687e-06	1.70022e-06	1.9071e-06	1.67921e-06	1.32498e-06	1.68577e-06
Endozoicomonadaceae	1.04905e-05	9.91016e-06	1.18114e-05	1.6186e-05	1.03681e-05	1.00431e-05	1.22837e-05	1.15441e-05	1.52818e-05	1.36632e-05	1.14245e-05	1.24191e-05	1.57284e-05	1.28871e-05	1.42588e-05	1.28718e-05	1.11616e-05	1.20543e-05	1.37809e-05	1.08305e-05	1.10433e-05	7.6638e-06	1.26218e-05	1.19054e-05
Enterobacteriaceae	0.000403971	0.00041147	0.000728427	0.00024783	0.000606969	0.000389298	0.000266795	0.000805301	0.00118475	0.001712	0.000620084	0.00187374	0.00117277	0.00345921	0.000888479	0.00107538	0.00169886	0.00237753	0.00241939	0.00356441	0.00101668	0.005275	0.00353831	0.00146834
Enterococcaceae	0.00140604	0.000610199	0.00278538	0.000353674	0.00282739	0.00176546	0.000507814	0.00697135	0.00989218	0.0158631	0.00407148	0.0184299	0.0101536	0.0345617	0.00765669	0.00975608	0.0161064	0.0204761	0.0256324	0.0383944	0.00859188	0.0590073	0.039268	0.0144623
Enterocytozoonidae	7.9819e-08	9.61955e-08	6.72934e-07	4.3101e-07	4.74896e-07	4.19933e-07	4.0506e-07	1.82992e-07	3.26229e-07	5.37812e-07	9.19097e-08	4.55363e-07	3.75789e-06	6.98775e-06	9.33316e-08	2.12932e-07	6.63166e-07	5.01735e-07	0	5.46886e-07	7.54059e-06	1.00572e-06	1.05096e-07	6.3659e-07
Entomoplasmataceae	1.4839e-08	0	0	0	0	0	0	0	0	3.19303e-07	3.83868e-08	1.84544e-08	1.3634e-07	1.61871e-05	3.22266e-08	1.82852e-08	0	0	0	0	0	0	2.93909e-08	0
Entophysalidaceae	4.58681e-06	4.30431e-06	5.71279e-06	4.65513e-06	5.12545e-06	5.53027e-06	4.88319e-06	6.06091e-06	5.81573e-06	4.54398e-06	6.09224e-06	4.87014e-06	4.98701e-06	6.09157e-06	5.02221e-06	6.07241e-06	5.19477e-06	4.77115e-06	6.36102e-06	4.05964e-06	5.40404e-06	3.61773e-06	6.16726e-06	4.46192e-06
Eremomycetaceae	0	0	0	1.07348e-07	5.24269e-07	2.89423e-07	5.18533e-07	1.25415e-06	1.11582e-07	3.38859e-07	0	5.35886e-07	0	9.00749e-07	2.79995e-07	0	5.37423e-07	3.13433e-07	6.27475e-07	1.04563e-06	0	4.42417e-07	8.55156e-07	2.59474e-07
Erwiniaceae	3.36418e-05	4.18141e-05	2.99808e-05	3.81787e-05	3.21412e-05	3.63049e-05	2.97347e-05	4.41572e-05	4.75287e-05	3.24052e-05	3.45165e-05	2.93737e-05	3.30344e-05	2.85234e-05	2.80949e-05	3.19368e-05	2.80227e-05	3.65496e-05	3.91658e-05	3.04924e-05	3.51317e-05	2.71795e-05	3.0068e-05	3.16431e-05
Erysipelotrichaceae	1.20724e-05	9.4756e-06	1.29489e-05	1.01884e-05	1.14889e-05	1.20348e-05	9.62166e-06	1.72034e-05	1.48717e-05	2.30106e-05	1.70624e-05	2.25158e-05	1.61474e-05	5.19983e-05	1.54177e-05	1.75762e-05	1.92753e-05	3.07855e-05	3.71109e-05	4.31352e-05	2.17955e-05	6.015e-05	4.27682e-05	2.36396e-05
Erysiphaceae	3.01791e-06	3.4272e-06	5.00288e-06	2.28027e-06	4.5381e-06	4.36829e-06	3.64166e-06	4.68269e-06	1.41878e-05	1.25742e-05	4.11634e-06	1.32164e-05	9.30088e-06	2.15403e-05	5.08312e-06	6.10599e-06	9.1914e-06	1.82559e-05	1.44178e-05	2.35881e-05	2.7607e-05	3.42757e-05	2.17145e-05	7.67853e-06
Erythrobacteraceae	0.00217397	0.00173984	0.00128018	0.00163411	0.00231121	0.0022622	0.00233647	0.00243566	0.00333616	0.00259441	0.00211872	0.00248783	0.00229566	0.00251279	0.00220566	0.00236157	0.00225928	0.00238703	0.00232146	0.00198861	0.00164319	0.00131305	0.00174896	0.00177792
Eubacteriaceae	7.11991e-06	9.76856e-06	9.44472e-06	1.00277e-05	8.55171e-06	1.03284e-05	9.29737e-06	7.66e-06	1.248e-05	1.38488e-05	8.2912e-06	1.0583e-05	9.23964e-06	9.56193e-06	1.02063e-05	9.99581e-06	6.29427e-06	8.70831e-06	6.65953e-06	8.17317e-06	8.78828e-06	7.96913e-06	9.0684e-06	9.64673e-06
Euzebyaceae	9.04191e-05	9.18822e-05	8.496e-05	0.000103396	0.00012794	0.000128103	0.000119845	0.00012303	0.000140306	0.000124671	0.000126013	0.000121743	0.000109196	0.000107914	0.000125612	0.000107399	0.000173925	0.000169127	0.000186853	0.000145222	9.66133e-05	8.96567e-05	9.59336e-05	9.43744e-05
Exidiaceae	7.22329e-08	1.11099e-07	6.16218e-08	1.27325e-06	1.00821e-07	5.71701e-08	0	1.11151e-07	1.7769e-07	4.09277e-07	1.65814e-06	3.63992e-07	2.70414e-07	1.34801e-06	5.11342e-07	1.08086e-07	4.51116e-07	5.53731e-07	1.4352e-06	1.55812e-06	1.06323e-07	1.7658e-06	1.04207e-06	5.69981e-07
Fastidiosibacteraceae	9.08978e-07	1.32064e-06	5.79076e-06	1.79465e-06	2.48068e-06	9.93974e-07	1.84221e-06	7.79809e-07	1.36484e-06	6.89697e-07	1.16562e-06	1.23907e-06	1.51401e-06	6.61896e-07	1.28664e-06	1.35363e-06	1.14742e-06	2.89284e-06	1.19784e-06	3.11707e-07	8.40459e-08	1.26661e-06	7.08624e-07	4.84097e-07
Ferrimonadaceae	1.16494e-05	1.03144e-05	1.69365e-05	8.69988e-06	1.7644e-05	1.16857e-05	7.04904e-06	4.0242e-05	4.14749e-05	6.73992e-05	2.41773e-05	8.19229e-05	4.72251e-05	0.000173994	3.57639e-05	4.5789e-05	6.81718e-05	0.000101062	0.000105056	0.000160524	4.00698e-05	0.000236224	0.000152201	6.24549e-05
Ferroplasmaceae	0	0	1.43389e-07	0	0	1.00233e-07	0	0	4.93534e-08	0	6.91431e-08	0	2.71471e-07	1.05848e-07	3.26062e-07	6.6934e-08	7.80753e-07	4.35862e-07	9.44973e-07	1.34113e-07	1.11868e-06	1.07111e-07	2.91762e-07	4.35589e-07
Ferrovaceae	3.59353e-05	3.63892e-05	3.63574e-05	3.69788e-05	3.2171e-05	3.54276e-05	3.36591e-05	3.65493e-05	3.38997e-05	2.55305e-05	3.067e-05	2.43605e-05	3.42457e-05	2.5168e-05	3.09284e-05	2.87573e-05	2.91862e-05	3.2154e-05	3.12257e-05	3.21025e-05	2.63902e-05	2.30439e-05	2.81635e-05	3.48211e-05
Fervidicoccaceae	0	0	1.11287e-07	0	0	0	0	3.98934e-07	0	0	4.43238e-07	2.86676e-07	3.86489e-07	0	4.43613e-07	0	0	6.35694e-07	0	0	0	7.05076e-07	0	0
Fervidobacteriaceae	2.57706e-06	2.61366e-06	1.56359e-06	2.28147e-06	3.54993e-06	2.00164e-06	2.74274e-06	2.31632e-06	3.81073e-06	1.98396e-06	3.42371e-06	2.29799e-06	3.56863e-06	2.0034e-06	2.48656e-06	2.56311e-06	3.52138e-06	3.73658e-06	3.38662e-06	2.97796e-06	1.31775e-06	2.96446e-06	2.7389e-06	1.28555e-06
Fibrobacteraceae	3.28172e-05	3.23917e-05	3.89523e-05	3.90339e-05	4.35202e-05	4.05506e-05	4.07927e-05	3.68663e-05	2.94769e-05	3.23597e-05	2.82249e-05	2.70676e-05	3.86329e-05	3.1293e-05	4.32964e-05	4.32988e-05	2.1424e-05	2.4922e-05	2.04342e-05	2.1563e-05	1.69729e-05	1.35893e-05	2.35781e-05	2.20765e-05
Fimbriimonadaceae	0.000150883	0.00022074	0.00015961	0.000243571	0.000247156	0.000309221	0.000240375	0.000240173	0.000166991	0.000179182	0.000177429	0.000181889	0.000181301	0.000141456	0.000234286	0.00018497	7.92891e-05	5.86077e-05	7.56581e-05	6.39013e-05	0.000135858	0.000132762	0.000155098	0.000174688
Fistulinaceae	0	0	0	3.26456e-07	0	0	0	0	0	1.02549e-07	2.862e-07	8.18435e-07	4.00234e-07	3.74191e-07	0	0	0	1.6353e-07	6.32249e-07	5.64534e-07	0	1.76836e-06	6.9896e-07	1.92011e-07
Flammeovirgaceae	5.30874e-05	6.75903e-05	7.22585e-05	6.03132e-05	6.31886e-05	6.04674e-05	7.53893e-05	7.90759e-05	6.8002e-05	0.000101484	7.07441e-05	7.11433e-05	7.6371e-05	6.51152e-05	7.52996e-05	6.77877e-05	6.50996e-05	6.89441e-05	7.27228e-05	6.57889e-05	7.31934e-05	4.83456e-05	4.72841e-05	5.41179e-05
Flaviviridae	4.92833e-07	3.19677e-07	0	0	2.26774e-07	0	1.25765e-07	0	5.38111e-07	5.44725e-07	2.62727e-07	2.62529e-07	3.38908e-07	4.39205e-07	2.76411e-07	7.40407e-07	0	3.9626e-07	0	0	1.14153e-07	0	1.24064e-07	5.1781e-07
Flavobacteriaceae	0.000783198	0.000772264	0.00102629	0.000866802	0.000764656	0.000829857	0.000857169	0.000676852	0.000916789	0.000995351	0.000918454	0.000924614	0.000956184	0.000830626	0.000982904	0.000918714	0.00104317	0.00104127	0.00105831	0.000979049	0.00140725	0.000784287	0.0007929	0.000920546
Flexibacteraceae	3.46068e-06	6.44972e-06	5.33402e-06	3.87872e-06	2.95043e-06	2.86245e-06	4.33013e-06	3.20711e-06	4.62524e-06	3.87748e-06	2.81084e-06	3.93314e-06	5.56544e-06	4.54434e-06	5.19377e-06	4.57566e-06	2.90582e-06	4.82224e-06	1.49604e-06	2.47995e-06	4.83901e-06	3.08106e-06	2.46517e-06	1.8974e-06
Fomitopsidaceae	2.00128e-06	1.70377e-06	1.78135e-06	2.20862e-06	1.12806e-06	1.07273e-06	1.03173e-06	2.01404e-06	3.1743e-06	4.01702e-06	5.58214e-06	3.32208e-06	1.19905e-06	2.68564e-06	1.33055e-06	1.44971e-06	1.44584e-06	1.84882e-06	3.53534e-06	3.63668e-06	5.46883e-06	7.24909e-06	5.40124e-06	2.95644e-06
Fortieaceae	1.29557e-05	1.21807e-05	1.90102e-05	1.35959e-05	1.327e-05	1.40301e-05	1.65219e-05	1.2494e-05	1.15393e-05	1.08174e-05	1.47874e-05	1.16408e-05	1.33773e-05	1.10976e-05	1.27541e-05	1.21885e-05	1.20283e-05	7.33307e-06	1.36358e-05	1.41397e-05	1.48069e-05	1.35129e-05	1.13099e-05	1.12007e-05
Francisellaceae	1.26501e-06	3.30496e-06	2.02974e-06	2.99446e-06	1.4707e-06	1.57893e-06	3.2654e-06	2.55894e-06	9.83614e-07	1.99129e-06	2.2695e-06	1.49779e-06	1.29108e-06	1.55869e-06	1.76272e-06	1.84124e-06	6.90633e-07	2.90152e-06	2.18254e-06	6.20523e-07	4.11808e-06	2.79784e-06	3.48374e-06	1.81736e-06
Frankiaceae	0.000634483	0.000606733	0.00516919	0.0006353	0.00087603	0.00090349	0.000937766	0.00101744	0.000544866	0.000601757	0.000487755	0.000532465	0.000518304	0.000724339	0.000488979	0.000563364	0.000520083	0.0005714	0.000488827	0.000510524	0.000387975	0.000568995	0.000573288	0.000422081
Fulvivirgaceae	0.000201944	0.000345306	0.000448173	0.000262225	0.000262118	0.000218213	0.00101385	0.000254185	0.000406214	0.000626175	0.000361365	0.000358528	0.000312694	0.000299829	0.000280301	0.000306368	0.000316532	0.000358613	0.00048816	0.000469816	0.000299282	0.000187555	0.000216152	0.000226608
Fuselloviridae	1.2486e-07	0	6.99821e-08	1.13482e-07	1.06991e-07	1.65385e-07	2.22783e-07	2.49196e-07	0	0	0	0	0	3.48299e-07	0	9.3536e-08	0	0	0	0	0	0	0	0
Fusobacteriaceae	3.20331e-06	2.43118e-06	2.9081e-06	3.47415e-06	3.38245e-06	2.92965e-06	2.75153e-06	1.83637e-06	2.35734e-06	4.04365e-06	3.04549e-06	3.3892e-06	2.06003e-06	2.05081e-06	3.31308e-06	2.98109e-06	4.51481e-06	1.88966e-06	2.19191e-06	3.25153e-06	3.44759e-06	3.98611e-06	3.96921e-06	2.05603e-06
Gaiellaceae	0.00035127	0.000402677	0.000380793	0.00036679	0.00040388	0.000407993	0.000407126	0.00044185	0.000443343	0.00044256	0.000425113	0.000407447	0.000471265	0.000405957	0.000437911	0.000434761	0.000279632	0.000222525	0.000851231	0.000235541	0.000332148	0.000285304	0.000387432	0.000359199
Gallionellaceae	0.000376257	0.000370117	0.000387997	0.00039333	0.000346001	0.000342552	0.000324305	0.0003156	0.000358107	0.000335881	0.000374803	0.000343651	0.000359159	0.000299102	0.000340153	0.000338227	0.000362936	0.000317326	0.000307166	0.000318283	0.000302704	0.000271027	0.000303825	0.000349869
Gelatoporiaceae	1.32105e-06	1.99481e-06	2.23235e-06	1.41608e-06	8.80697e-07	1.43151e-06	1.21319e-06	1.9938e-06	2.29825e-07	1.09766e-06	2.88495e-06	1.58973e-06	1.20467e-06	2.11442e-06	8.33922e-07	1.97866e-07	1.10227e-06	1.05094e-06	6.15268e-07	1.6485e-06	1.0479e-06	2.13578e-06	1.87494e-06	3.77471e-07
Geminicoccaceae	4.71518e-05	5.02058e-05	5.7509e-05	5.4232e-05	4.5215e-05	4.33394e-05	5.21851e-05	4.59222e-05	5.06539e-05	4.62129e-05	5.18954e-05	4.9113e-05	5.2483e-05	4.30918e-05	4.36012e-05	4.58174e-05	6.11505e-05	5.64506e-05	5.02917e-05	5.92054e-05	4.83813e-05	4.33469e-05	5.21975e-05	5.51192e-05
Geminiviridae	0	0	0	0	7.01589e-08	9.52834e-08	0	0	9.34741e-07	3.11846e-07	0	2.12897e-07	2.13762e-07	8.53965e-07	1.40799e-07	0	1.00406e-07	1.16325e-07	3.44704e-07	5.39218e-07	2.36242e-07	1.64898e-06	1.7389e-05	2.68943e-06
Gemmataceae	0.000856848	0.00101267	0.00110908	0.00110059	0.00124964	0.00116212	0.00117336	0.00110483	0.000905834	0.000889912	0.000991531	0.000922415	0.00097594	0.000882208	0.000985414	0.00101318	0.000846377	0.000770984	0.000814983	0.000729978	0.000838291	0.000684313	0.00073735	0.000857799
Gemmatimonadaceae	0.0281861	0.024531	0.0270373	0.0258417	0.029715	0.030369	0.0285146	0.0252977	0.0246334	0.0268915	0.0264306	0.0254486	0.029219	0.0283165	0.0335817	0.02954	0.0228706	0.0208069	0.0201654	0.0215735	0.0349618	0.0272054	0.030499	0.0330407
Geobacteraceae	0.000419738	0.000447988	0.000426309	0.000442555	0.000445731	0.000430249	0.000444995	0.00039763	0.000414492	0.000411206	0.000434792	0.000410618	0.000452324	0.000377604	0.000464691	0.000436113	0.000399917	0.000359292	0.000363572	0.000341058	0.000394743	0.000331961	0.000351001	0.000391284
Geodermatophilaceae	0.000525205	0.000615184	0.000764011	0.000618842	0.000881478	0.000934057	0.00094848	0.000918012	0.000614232	0.000646975	0.000623938	0.000608672	0.000603364	0.000597718	0.000657	0.000632642	0.000640665	0.000604208	0.000612448	0.000589497	0.000569487	0.000470517	0.000550187	0.000552529
Gigasporaceae	1.63748e-05	4.8377e-05	3.05962e-05	2.26004e-05	1.79766e-05	7.785e-06	8.52643e-06	1.48307e-05	3.45852e-05	3.1544e-05	1.74576e-05	2.833e-05	1.41498e-05	3.24333e-05	8.30982e-06	1.93593e-05	2.12744e-05	2.15994e-05	3.27023e-05	3.79326e-05	1.19445e-05	6.79224e-05	3.95387e-05	1.51854e-05
Gloeobacteraceae	8.97981e-05	9.77719e-05	9.77749e-05	9.74969e-05	9.74533e-05	0.000104011	0.000104098	9.83541e-05	7.47459e-05	8.518e-05	8.98653e-05	8.79852e-05	8.7985e-05	8.06271e-05	0.000100955	8.82252e-05	8.20315e-05	7.18901e-05	7.10642e-05	6.93244e-05	9.14876e-05	6.45192e-05	8.10316e-05	9.31289e-05
Gloeomargaritaceae	2.4038e-06	2.66367e-06	2.413e-06	2.30766e-06	3.37308e-06	2.37167e-06	2.4252e-06	3.5e-06	1.78343e-06	1.0057e-06	3.25774e-06	2.5107e-06	2.63883e-06	1.40878e-06	3.32278e-06	3.25207e-06	1.34221e-06	1.95001e-06	8.44703e-07	1.37752e-06	1.88582e-06	1.71534e-06	1.34708e-06	1.20365e-06
Gloeophyllaceae	1.09252e-07	5.18707e-07	1.97525e-07	1.01091e-06	9.36597e-07	4.74635e-07	9.74676e-08	3.62657e-07	3.2263e-07	6.51874e-07	0	1.83573e-07	1.30149e-06	9.77478e-07	3.93783e-07	6.94839e-08	3.54323e-07	2.00373e-06	3.11588e-07	1.42398e-06	7.49298e-07	4.08547e-06	5.25696e-07	4.54457e-07
Glomeraceae	0.000163976	0.000296506	0.000258528	0.000222856	0.000243805	8.33419e-05	7.4008e-05	0.000198103	0.00093197	0.0014941	0.000307652	0.000540835	0.000265872	0.00078891	0.00020243	0.000294701	0.000367951	0.000518101	0.000520522	0.000677423	0.000177696	0.000952186	0.000685237	0.000294905
Glomerellaceae	3.0447e-06	2.07206e-06	4.61902e-06	3.33348e-06	3.69072e-06	3.39436e-06	5.93361e-06	5.61624e-06	6.90159e-06	8.61447e-06	1.70872e-05	8.44137e-06	9.33513e-06	1.46919e-05	5.01372e-06	6.59404e-06	6.61537e-06	1.3487e-05	1.14944e-05	1.67463e-05	5.73567e-06	2.19119e-05	1.69951e-05	6.66709e-06
Gloniaceae	1.67009e-06	2.57107e-06	9.73997e-07	1.15034e-06	1.3362e-06	2.03555e-06	2.59405e-06	1.0396e-06	2.29654e-06	1.03634e-06	7.9133e-07	8.15616e-07	1.59093e-06	2.07272e-06	2.25565e-06	1.20875e-06	8.63518e-07	1.51959e-06	1.00449e-06	1.44584e-06	3.28467e-06	1.19444e-06	1.09397e-06	1.69472e-06
Glycomycetaceae	3.93173e-05	4.11163e-05	3.76721e-05	3.69023e-05	4.80779e-05	4.18594e-05	5.31587e-05	5.74828e-05	0.000123555	9.74432e-05	9.5725e-05	9.79625e-05	4.96347e-05	5.26211e-05	4.69398e-05	5.68552e-05	4.20116e-05	4.11006e-05	3.78165e-05	3.88816e-05	3.57033e-05	2.88064e-05	3.62379e-05	3.53504e-05
Gnomoniaceae	0	1.53166e-07	2.17172e-07	0	0	2.24795e-07	2.27109e-07	1.45683e-07	0	0	0	0	2.59411e-07	0	0	0	0	0	0	0	0	0	0	0
Gomontiellaceae	2.86462e-05	3.09983e-05	2.95155e-05	2.97329e-05	3.51274e-05	3.04801e-05	3.69061e-05	2.5141e-05	2.6815e-05	3.49691e-05	3.27628e-05	3.2212e-05	3.15117e-05	2.90578e-05	2.78418e-05	3.36252e-05	3.35432e-05	3.27677e-05	3.35702e-05	2.75941e-05	3.22152e-05	2.49784e-05	2.96296e-05	3.37667e-05
Gomphaceae	0	0	0	0	4.75903e-08	0	0	0	0	0	9.09135e-07	0	0	0	0	0	0	0	0	0	0	0	0	0
Gonapodyaceae	7.31574e-07	8.71508e-07	1.60144e-06	1.06172e-06	1.25962e-06	6.75311e-07	1.63898e-06	1.96894e-06	2.49023e-06	2.86639e-06	1.24899e-06	2.76393e-06	1.28215e-06	6.1509e-06	1.05978e-06	2.34377e-06	2.68423e-06	4.42196e-06	3.63505e-06	4.52393e-06	1.55663e-06	8.61181e-06	6.13082e-06	2.34947e-06
Gordoniaceae	4.30086e-05	5.50555e-05	7.43493e-05	5.81668e-05	8.01445e-05	7.31126e-05	8.48485e-05	7.63778e-05	6.55372e-05	6.09013e-05	5.38188e-05	6.5179e-05	5.60268e-05	6.5593e-05	6.36065e-05	6.33999e-05	6.63925e-05	6.14132e-05	6.31519e-05	6.76993e-05	5.43173e-05	4.53998e-05	5.23262e-05	6.18654e-05
Gottschalkiaceae	1.3045e-07	1.00436e-06	4.80724e-07	1.48975e-06	7.91327e-08	3.89562e-07	3.6464e-07	4.37187e-07	2.13865e-07	6.24497e-07	7.81614e-07	4.61936e-07	7.11717e-07	0	7.98925e-07	1.27614e-06	9.57886e-07	0	5.99033e-07	7.36318e-07	1.1031e-07	9.82905e-08	0	0
Gracilibacteraceae	2.54919e-06	1.99239e-06	2.58992e-06	1.19103e-06	7.84715e-07	1.21294e-06	1.97947e-06	1.01127e-06	2.07011e-06	3.31463e-06	3.83044e-06	3.26364e-06	2.76467e-06	2.36616e-06	2.14683e-06	2.38223e-06	2.85581e-06	2.36417e-06	3.62432e-07	2.55679e-06	1.60256e-06	1.44361e-06	2.27345e-06	1.64289e-06
Granulosicoccaceae	8.92896e-06	1.10574e-05	1.02258e-05	1.41737e-05	9.77172e-06	9.75096e-06	1.11444e-05	1.09205e-05	1.32908e-05	9.85503e-06	1.15598e-05	7.96422e-06	8.88173e-06	8.07847e-06	1.35958e-05	9.88629e-06	1.10278e-05	9.31804e-06	9.90772e-06	9.48926e-06	1.07852e-05	6.37721e-06	8.09788e-06	6.96064e-06
Grifolaceae	6.05036e-07	1.82347e-06	5.25187e-07	1.01534e-06	9.86291e-08	3.74879e-07	5.56948e-07	7.66914e-07	7.38755e-07	1.04857e-06	2.38528e-06	5.19941e-07	3.77485e-07	1.68646e-06	3.17831e-07	6.15401e-07	9.34499e-07	1.71743e-06	6.14722e-07	1.0771e-06	1.02974e-06	4.54881e-06	1.7206e-06	1.34744e-06
Hafniaceae	5.12959e-06	4.89918e-06	5.15599e-06	2.33782e-06	4.84871e-06	5.35429e-06	3.81158e-06	3.95932e-06	3.32772e-06	4.04694e-06	1.4015e-06	4.00745e-06	3.11479e-06	3.96449e-06	3.50286e-06	3.60168e-06	3.85953e-06	4.94644e-06	1.49059e-06	3.44424e-06	4.09102e-06	2.12815e-06	3.54297e-06	2.4804e-06
Hahellaceae	2.42918e-05	2.39264e-05	2.72213e-05	3.24941e-05	1.93955e-05	2.51403e-05	3.21908e-05	3.10292e-05	2.48914e-05	2.04877e-05	2.82331e-05	2.5245e-05	2.439e-05	1.77888e-05	2.51339e-05	2.49185e-05	3.01564e-05	3.70384e-05	4.53522e-05	2.97028e-05	2.5836e-05	2.09509e-05	2.38927e-05	2.06159e-05
Halanaerobiaceae	5.6788e-06	6.47251e-06	6.39587e-06	7.16288e-06	4.40852e-06	4.84008e-06	5.69854e-06	6.38486e-06	5.56039e-06	6.74974e-06	4.8423e-06	7.75709e-06	7.4944e-06	4.33618e-06	5.89168e-06	3.14964e-06	5.22223e-06	3.61296e-06	4.32183e-06	3.84494e-06	3.86847e-06	3.9599e-06	4.76271e-06	3.56066e-06
Halieaceae	0.00015062	0.000140785	0.000168286	0.000147117	0.000144784	0.000128152	0.000139626	0.000136394	0.000277914	0.000144551	0.000149944	0.00014368	0.00013562	0.000128558	0.000138114	0.000141183	0.000145856	0.000166813	0.000149603	0.000140987	0.000143972	0.00010198	0.000128384	0.000149015
Haliscomenobacteraceae	2.79675e-05	2.28586e-05	3.65303e-05	2.79098e-05	1.84814e-05	2.37752e-05	2.80882e-05	1.86571e-05	3.83853e-05	3.65935e-05	3.80335e-05	3.73601e-05	4.48372e-05	3.14688e-05	4.40376e-05	3.61085e-05	5.56983e-05	5.85567e-05	6.30354e-05	5.36223e-05	4.68782e-05	3.37219e-05	2.51118e-05	4.01131e-05
Haloarculaceae	9.05913e-06	9.67492e-06	1.06435e-05	9.99675e-06	9.20823e-06	1.13971e-05	1.29002e-05	1.05035e-05	1.10019e-05	1.08874e-05	1.17238e-05	1.13732e-05	1.41966e-05	1.3697e-05	1.31311e-05	9.65601e-06	1.13739e-05	1.01526e-05	1.2884e-05	1.66151e-05	1.23589e-05	1.33682e-05	1.09912e-05	1.17534e-05
Halobacteriaceae	1.55608e-05	1.94969e-05	1.62527e-05	2.06506e-05	1.85155e-05	2.00548e-05	1.69393e-05	1.90264e-05	1.5732e-05	1.27279e-05	1.72719e-05	1.83054e-05	1.67277e-05	1.44629e-05	1.91656e-05	2.02489e-05	1.60644e-05	1.14122e-05	1.38449e-05	1.63577e-05	1.65737e-05	1.22733e-05	1.35297e-05	1.65153e-05
Halobacteriovoraceae	7.53439e-06	6.66912e-06	1.1777e-05	1.26715e-05	8.57282e-06	8.39882e-06	9.82194e-06	9.93703e-06	1.08677e-05	1.00219e-05	1.12051e-05	1.11849e-05	1.2521e-05	9.76919e-06	1.14571e-05	1.2517e-05	9.32515e-06	1.3553e-05	8.75239e-06	9.94857e-06	1.15704e-05	9.83427e-06	9.77617e-06	1.39058e-05
Halobacteroidaceae	3.71572e-06	4.8812e-06	5.38758e-06	5.75893e-06	3.8573e-06	4.6098e-06	3.61422e-06	3.00253e-06	4.46103e-06	5.50477e-06	7.43632e-06	6.86403e-06	4.95275e-06	5.55098e-06	6.20683e-06	4.51082e-06	2.80464e-06	2.95262e-06	4.26782e-06	2.35497e-06	4.75854e-06	3.30761e-06	5.08576e-06	5.1893e-06
Halococcaceae	3.58994e-06	3.89061e-06	4.92874e-06	3.22526e-06	2.64444e-06	4.38164e-06	2.47436e-06	3.20068e-06	3.48045e-06	2.70284e-06	3.7981e-06	3.90019e-06	3.71065e-06	1.43479e-06	4.63224e-06	3.02588e-06	1.64566e-06	1.82393e-06	4.03164e-06	1.4941e-06	3.44675e-06	2.90737e-06	5.09207e-06	4.31128e-06
Haloferacaceae	1.08794e-05	1.16551e-05	1.43102e-05	1.22943e-05	1.62977e-05	1.45617e-05	1.44444e-05	1.62353e-05	1.65311e-05	1.71739e-05	1.84124e-05	1.45022e-05	1.79172e-05	1.81639e-05	1.8582e-05	1.98527e-05	2.00937e-05	1.41515e-05	1.43509e-05	1.57504e-05	1.5732e-05	1.26869e-05	1.53043e-05	1.52179e-05
Halomonadaceae	0.000229801	0.000228622	0.000256501	0.000234297	0.000238728	0.000231249	0.000227551	0.000290296	0.000343011	0.000419334	0.000265792	0.000456311	0.000363188	0.000664997	0.000306834	0.00032369	0.000418	0.000495141	0.00051279	0.000676951	0.000310005	0.000920167	0.000694541	0.000383557
Haloplasmataceae	1.28532e-07	0	0	1.04523e-07	0	0	1.02598e-07	9.74373e-08	0	0	0	3.07755e-07	8.64703e-08	3.55523e-07	6.17144e-07	2.14583e-07	6.53419e-07	4.7841e-07	5.72242e-07	1.10267e-06	6.73686e-07	0	3.41669e-07	2.82369e-07
Halorubraceae	1.56694e-05	1.1687e-05	1.2643e-05	1.48858e-05	1.36589e-05	1.54702e-05	1.66584e-05	1.4375e-05	1.43344e-05	1.47802e-05	1.77182e-05	1.84663e-05	1.90675e-05	1.18251e-05	1.38261e-05	1.63506e-05	2.33073e-05	2.15796e-05	1.67844e-05	1.80399e-05	2.07167e-05	1.73031e-05	1.58702e-05	2.37673e-05
Halothiobacillaceae	2.19433e-05	2.75185e-05	2.5184e-05	3.15046e-05	2.41726e-05	2.29035e-05	2.75073e-05	2.42802e-05	2.37967e-05	2.50067e-05	2.65944e-05	2.7353e-05	2.12674e-05	1.87119e-05	2.5211e-05	2.39926e-05	2.34903e-05	1.84763e-05	1.45267e-05	2.19932e-05	2.04615e-05	1.63479e-05	1.77787e-05	2.04248e-05
Hapalosiphonaceae	0.00015663	0.000142092	0.000157082	0.000160761	0.000162486	0.000154915	0.000172603	0.000150069	0.000149173	0.000141183	0.000167392	0.000154385	0.000135741	0.000129311	0.000147254	0.00012984	0.000165111	0.000147413	0.000159974	0.000145525	0.000181089	0.000142807	0.000143512	0.000165263
Harpellaceae	0	0	2.94325e-07	0	0	0	2.96104e-07	0	0	0	0	5.91167e-08	0	0	0	0	0	2.8687e-07	0	0	0	7.08024e-07	0	0
Harpochytriaceae	0	0	0	0	0	0	9.50904e-08	2.74488e-07	0	0	0	0	0	0	0	4.35613e-07	0	0	0	0	0	0	0	0
Helicobacteraceae	9.946e-06	7.74738e-06	1.05253e-05	7.44752e-06	8.80711e-06	7.59338e-06	1.02638e-05	8.49394e-06	1.13771e-05	7.89592e-06	6.88422e-06	1.30818e-05	9.8884e-06	9.20688e-06	1.05246e-05	9.93416e-06	8.09036e-06	7.6586e-06	5.8849e-06	7.86394e-06	6.93252e-06	7.29222e-06	7.08101e-06	9.74917e-06
Heliobacteriaceae	1.76451e-05	2.00315e-05	1.92197e-05	1.90801e-05	1.75907e-05	1.53535e-05	1.55248e-05	1.62267e-05	2.03834e-05	2.54692e-05	2.94233e-05	2.08739e-05	2.42592e-05	1.63288e-05	2.0264e-05	1.93567e-05	2.65022e-05	2.29307e-05	2.40015e-05	2.06384e-05	1.68694e-05	1.76231e-05	1.8798e-05	2.02427e-05
Helotiaceae	6.95617e-07	1.14131e-07	1.1288e-06	4.90626e-07	3.38792e-07	8.50352e-07	7.2989e-07	1.01707e-06	1.44316e-07	1.85736e-07	8.20555e-07	1.03429e-06	1.46259e-07	6.33383e-07	5.0127e-07	4.69861e-07	0	6.92534e-07	1.42969e-07	9.51411e-07	8.56779e-08	4.23022e-07	3.0749e-07	3.80651e-07
Herelleviridae	2.85627e-07	4.69042e-06	1.66176e-07	7.79579e-07	1.54551e-07	2.01777e-07	2.1175e-07	1.47111e-07	6.36292e-08	4.20306e-07	0	0	1.25886e-07	4.43911e-08	2.37571e-07	1.20592e-07	0	0	0	0	0	0	0	0
Hericiaceae	3.62243e-07	3.83922e-07	4.52981e-07	6.23996e-07	1.41656e-06	2.94887e-07	1.35607e-07	1.80131e-06	1.10428e-06	2.49038e-06	3.0935e-06	3.22329e-06	1.74029e-06	5.58586e-06	6.24503e-07	2.3363e-06	2.86229e-06	4.71243e-06	4.97005e-06	5.31285e-06	3.69424e-06	9.44276e-06	4.91828e-06	2.3664e-06
Herpesviridae	2.18504e-07	0	0	0	5.95473e-07	1.92949e-07	0	9.37834e-08	1.92478e-07	9.74219e-08	2.82622e-07	0	1.75102e-07	8.48979e-08	0	0	3.74593e-07	2.82089e-07	0	0	1.1031e-07	1.04434e-07	1.08195e-07	1.20007e-07
Herpetosiphonaceae	0.000247737	0.000283553	0.000234212	0.000280535	0.000254703	0.000268122	0.000285451	0.000243003	0.000328785	0.000319698	0.000360708	0.00032375	0.000384285	0.000348336	0.000418201	0.000319771	0.000264521	0.000263739	0.000259066	0.000240518	0.000291568	0.000249841	0.000276868	0.000276871
Herpotrichiellaceae	3.17492e-06	3.29352e-06	3.46012e-06	2.12021e-06	2.62045e-06	3.51575e-06	4.40844e-06	4.02508e-06	2.46634e-06	4.62771e-06	3.32731e-06	3.1122e-06	2.12925e-06	7.10853e-06	1.34965e-06	2.53085e-06	2.97773e-06	4.19894e-06	4.14095e-06	5.34148e-06	2.01082e-06	7.48346e-06	4.91112e-06	2.2537e-06
Heteroscytonemataceae	2.60901e-07	0	0	0	0	0	0	3.3594e-07	0	0	0	0	0	0	0	0	0	0	0	0	0	0	0	0
Holophagaceae	8.6037e-05	0.000111189	9.57807e-05	9.732e-05	9.57043e-05	8.80886e-05	9.12223e-05	8.56178e-05	7.9922e-05	8.34149e-05	8.04349e-05	8.07103e-05	8.59469e-05	7.16465e-05	9.70152e-05	9.20422e-05	7.16139e-05	7.96032e-05	6.5785e-05	6.07785e-05	6.54188e-05	5.68671e-05	6.61703e-05	6.85071e-05
Holosporaceae	6.3182e-07	3.80146e-07	2.59843e-07	3.09497e-07	3.09337e-07	4.73602e-07	1.32788e-06	1.35915e-06	2.58333e-07	1.03895e-06	0	7.50083e-08	2.80164e-07	9.09896e-07	3.83282e-07	5.82375e-06	0	0	1.20005e-06	0	0	0	1.86142e-07	0
Hungateiclostridiaceae	3.10989e-05	3.54463e-05	3.54355e-05	4.35426e-05	3.12892e-05	3.39619e-05	3.12998e-05	3.51708e-05	3.90746e-05	3.00783e-05	3.60746e-05	3.22201e-05	4.1592e-05	3.5319e-05	4.16035e-05	4.15943e-05	2.68332e-05	2.97843e-05	3.04451e-05	2.82815e-05	2.8432e-05	2.12124e-05	2.26187e-05	2.85513e-05
Hyaloscyphaceae	5.94622e-07	7.83599e-07	8.34602e-07	7.1642e-07	1.14749e-06	5.95505e-07	1.54566e-06	1.24157e-06	2.09743e-07	1.12953e-07	6.98995e-07	1.57088e-06	1.38486e-06	6.66748e-07	4.73837e-07	7.45287e-07	2.78269e-07	4.2849e-07	1.48612e-07	4.32314e-07	1.14608e-07	4.35889e-07	2.358e-07	3.58167e-07
Hydnodontaceae	5.33902e-07	2.02257e-07	0	1.6717e-06	0	0	0	4.0355e-07	7.7769e-08	1.11339e-07	3.2933e-07	3.86465e-07	4.57555e-07	1.10497e-06	2.17774e-07	8.68549e-08	5.12888e-07	1.61194e-07	1.37695e-06	2.00303e-06	1.91575e-07	4.16248e-07	1.46785e-06	5.32232e-07
Hydrococcaceae	2.2881e-05	2.29491e-05	2.39647e-05	2.18402e-05	2.13035e-05	2.40867e-05	2.30422e-05	2.16215e-05	2.1775e-05	2.1254e-05	2.59628e-05	2.03423e-05	1.84295e-05	1.85978e-05	1.86124e-05	1.68208e-05	2.32087e-05	1.90479e-05	1.91879e-05	1.76689e-05	2.79249e-05	1.57143e-05	1.75209e-05	2.4288e-05
Hydrogenimonaceae	2.54603e-06	1.16932e-06	1.42813e-06	9.77504e-07	1.03429e-06	1.13536e-06	1.29855e-06	1.54231e-06	1.41644e-06	9.30251e-07	7.61568e-07	1.05558e-06	1.51787e-06	7.79614e-07	7.99732e-07	3.52362e-07	1.04881e-07	4.69974e-07	1.8524e-07	1.28681e-06	1.4566e-06	1.30047e-06	8.45723e-07	1.12887e-06
Hydrogenophilaceae	5.5049e-05	5.07668e-05	5.59023e-05	6.22417e-05	5.76764e-05	5.7629e-05	5.59198e-05	6.03069e-05	5.68381e-05	5.08387e-05	5.65638e-05	5.2336e-05	4.89323e-05	4.55388e-05	4.56032e-05	5.11058e-05	5.94789e-05	6.02338e-05	6.1097e-05	5.08877e-05	5.42073e-05	3.92748e-05	5.43599e-05	5.35313e-05
Hydrogenothermaceae	1.16627e-05	9.20032e-06	9.58446e-06	8.71669e-06	1.07358e-05	1.09557e-05	9.2988e-06	9.39199e-06	6.65209e-06	5.65199e-06	8.61817e-06	6.80803e-06	6.72155e-06	6.93958e-06	7.82129e-06	7.99139e-06	7.01856e-06	5.21468e-06	8.23739e-06	5.44321e-06	5.60718e-06	4.30684e-06	5.57711e-06	4.49284e-06
Hyellaceae	4.5194e-05	4.06477e-05	4.37266e-05	4.45979e-05	4.00355e-05	4.37284e-05	4.17439e-05	3.90042e-05	3.70297e-05	4.0304e-05	4.71444e-05	4.66516e-05	3.73946e-05	3.73102e-05	4.04643e-05	3.52296e-05	4.23638e-05	4.13539e-05	3.49132e-05	3.65119e-05	4.11233e-05	3.51771e-05	3.62239e-05	4.09275e-05
Hygrophoraceae	0	0	0	0	0	0	0	0	0	0	6.24334e-07	0	0	0	0	0	7.3505e-08	4.78838e-07	1.39988e-07	7.89497e-08	1.13165e-06	6.18605e-07	3.69952e-07	6.71122e-07
Hymenobacteraceae	0.000639484	0.000623537	0.00080043	0.000692426	0.000663932	0.000701552	0.000722769	0.000645242	0.000714356	0.000780852	0.000713872	0.000751486	0.00075631	0.000788603	0.000811501	0.000732153	0.000755728	0.000718771	0.000751655	0.000768836	0.000855957	0.000854572	0.000807613	0.000742686
Hymenochaetaceae	9.92072e-07	1.68908e-06	4.48262e-07	1.43101e-06	1.03953e-06	4.78771e-07	3.77294e-07	1.23847e-06	2.49626e-06	1.12023e-06	1.72935e-06	7.52459e-07	5.66574e-07	1.71846e-06	3.65973e-07	7.4796e-07	1.60478e-06	1.5275e-06	2.32793e-06	1.99768e-06	2.57532e-06	5.57692e-06	3.41927e-06	2.61097e-06
Hyphomicrobiaceae	0.00341993	0.00403969	0.00330377	0.00367277	0.00287566	0.0029359	0.00306888	0.00329099	0.00292356	0.0027734	0.00364204	0.00285219	0.00424858	0.00331596	0.00323836	0.00328803	0.00524195	0.00611511	0.00505886	0.00440266	0.00317398	0.00256515	0.00311582	0.00352669
Hyphomonadaceae	0.000122711	0.000134609	0.000138797	0.0001443	0.000134069	0.00013635	0.000155641	0.000141985	0.000155277	0.000127287	0.000138528	0.000131453	0.000126435	0.000122813	0.000118599	0.000129798	0.000200702	0.000190993	0.000181014	0.000140957	0.000122826	0.000119515	0.000128881	0.000128898
Hypocreaceae	5.32011e-06	5.21679e-06	4.9391e-06	6.12183e-06	5.01865e-06	4.32423e-06	5.46977e-06	4.19688e-06	5.24352e-06	5.0099e-06	6.80584e-06	3.88821e-06	4.9489e-06	4.46712e-06	4.6779e-06	5.50521e-06	1.34343e-06	4.92458e-06	2.79076e-06	4.3611e-06	3.07791e-06	5.54513e-06	3.82552e-06	2.84827e-06
Hypoxylaceae	2.57064e-07	0	1.9451e-07	3.05529e-07	9.88983e-07	3.08718e-07	2.21138e-06	1.03373e-06	1.60209e-06	7.34015e-07	1.19072e-06	5.46133e-07	0	7.68409e-07	7.48597e-08	9.37319e-07	5.72907e-07	6.81128e-07	1.34851e-06	2.14552e-06	1.20339e-06	1.31837e-06	3.83726e-07	7.62825e-07
Iamiaceae	0.000113302	0.000108482	0.000109186	0.000146163	0.000178307	0.000168873	0.000164456	0.000149772	0.000163903	0.000179981	0.000148056	0.000146324	0.000144598	0.000119444	0.000142732	0.00013888	0.00026556	0.00025218	0.000294612	0.000241431	0.00013941	0.000119402	0.000126698	0.000150436
Ichthyobacteriaceae	0	0	0	0	0	0	0	0	0	0	0	0	4.66939e-07	0	0	0	0	0	0	0	0	0	0	0
Idiomarinaceae	1.52281e-05	1.82579e-05	1.80443e-05	1.70368e-05	1.74867e-05	1.498e-05	1.53152e-05	1.14426e-05	1.73009e-05	1.88894e-05	1.90123e-05	2.00288e-05	1.75411e-05	1.50637e-05	1.67532e-05	1.55295e-05	1.51019e-05	1.48252e-05	1.90693e-05	1.5062e-05	1.31871e-05	1.17221e-05	1.40691e-05	1.47058e-05
Ignavibacteriaceae	3.22398e-05	3.32189e-05	3.48382e-05	4.24616e-05	3.66312e-05	3.84152e-05	3.67099e-05	3.40581e-05	3.69369e-05	3.51203e-05	3.79812e-05	3.96451e-05	4.32142e-05	3.28748e-05	4.81329e-05	3.5011e-05	4.41391e-05	3.42379e-05	4.57558e-05	3.65512e-05	4.54917e-05	3.08837e-05	3.28905e-05	4.13374e-05
Ilumatobacteraceae	0.000212258	0.000162684	0.000231143	0.000215748	0.000218676	0.000228514	0.000213946	0.000195814	0.000288787	0.000287652	0.000314007	0.000295578	0.000268535	0.000213078	0.000277585	0.000232487	0.000353835	0.000325417	0.000355363	0.000300457	0.000251376	0.000196854	0.000200041	0.00023677
Immundisolibacteraceae	1.24865e-05	1.14468e-05	1.28937e-05	1.13482e-05	1.05962e-05	9.43259e-06	1.37541e-05	8.83195e-06	1.05243e-05	9.64329e-06	1.10208e-05	1.0011e-05	1.11767e-05	1.20355e-05	1.16661e-05	9.35577e-06	1.11634e-05	1.04526e-05	8.65974e-06	8.59715e-06	8.68153e-06	9.38392e-06	1.09672e-05	1.15582e-05
Intrasporangiaceae	0.000322259	0.000367613	0.000581463	0.000392925	0.000548563	0.00053436	0.000585644	0.000567687	0.000397551	0.000412139	0.000408155	0.00037903	0.000376346	0.00038376	0.000423739	0.000388665	0.000434451	0.000448528	0.000398309	0.000401915	0.000462482	0.000377703	0.000468546	0.000491329
Iridoviridae	0	0	0	0	0	0	0	0	0	2.88657e-07	0	0	0	0	0	0	0	0	0	0	7.44262e-07	0	0	0
Isosphaeraceae	0.000700339	0.000800826	0.000815845	0.000820641	0.000837461	0.000810795	0.000787421	0.000794414	0.000667871	0.000708427	0.000711106	0.000699345	0.000767719	0.000706787	0.000777333	0.000808367	0.000568723	0.000517355	0.00056474	0.000523855	0.000645878	0.000508407	0.00053336	0.000605945
Jaapiaceae	9.30305e-08	2.37309e-07	3.8965e-07	1.95639e-07	2.23544e-07	3.3922e-07	1.2061e-07	3.14812e-08	7.66761e-07	6.722e-07	0	1.96778e-07	1.41735e-07	1.52815e-07	2.6981e-07	1.08095e-07	8.54335e-08	0	0	1.2553e-07	2.47095e-07	1.096e-06	5.67993e-07	8.04118e-07
Jiangellaceae	0.000139476	0.000172013	0.000188746	0.000164731	0.000218077	0.000227412	0.000229243	0.000234794	0.00037428	0.0004549	0.000305932	0.000301303	0.000196747	0.000192317	0.00020904	0.000186723	0.000192839	0.000212343	0.00020814	0.000177678	0.000180404	0.000136401	0.000169769	0.000161063
Jonesiaceae	9.81726e-07	1.87084e-06	1.72817e-06	2.15327e-06	1.96976e-06	2.14571e-06	2.84694e-06	3.33812e-06	2.54279e-06	3.23706e-06	2.05229e-06	4.8555e-06	2.66898e-06	1.76273e-06	2.87529e-06	3.06205e-06	3.4348e-06	4.4364e-06	2.62987e-06	2.4748e-06	3.88638e-06	2.5076e-06	3.16457e-06	3.42602e-06
Juglanconidaceae	0	0	0	0	0	2.93087e-07	0	4.47082e-07	2.53817e-07	0	0	0	0	6.93044e-08	0	3.74144e-07	0	0	5.79207e-07	5.02254e-07	2.26278e-07	1.69207e-06	8.83226e-08	0
Kallotenuaceae	0.000149584	0.000169574	0.000148266	0.000155955	0.000153734	0.000197843	0.000158847	0.000137447	0.000152398	0.000154423	0.000172317	0.000154679	0.000186428	0.0001621	0.000177682	0.000169274	0.0001224	0.000143057	0.000125489	0.000119801	0.00015522	0.000126776	0.000147373	0.000152837
Kangiellaceae	2.03621e-05	2.53765e-05	2.40022e-05	2.34649e-05	2.30427e-05	1.84441e-05	2.63318e-05	2.85812e-05	2.84676e-05	2.89625e-05	3.08638e-05	2.64364e-05	2.93877e-05	2.11131e-05	2.43272e-05	2.77734e-05	3.25253e-05	3.01447e-05	2.4744e-05	2.40079e-05	2.83925e-05	2.15117e-05	2.06332e-05	2.35512e-05
Kickxellaceae	3.80008e-07	0	2.69436e-07	0	1.82156e-06	5.90766e-07	0	1.32983e-06	1.63975e-06	1.80954e-06	5.88855e-07	1.61386e-06	1.91708e-06	6.20798e-06	7.22729e-07	1.94223e-06	2.35453e-06	2.37617e-06	3.84413e-06	8.13648e-06	8.76578e-07	8.52479e-06	4.75465e-06	1.28094e-06
Kiloniellaceae	5.02729e-05	5.12769e-05	4.59511e-05	4.51759e-05	3.92805e-05	4.23133e-05	4.13747e-05	4.29836e-05	7.33145e-05	6.34574e-05	7.37298e-05	6.41381e-05	5.72534e-05	4.10647e-05	4.41616e-05	5.5306e-05	0.000166142	7.59129e-05	7.31652e-05	6.05418e-05	3.90747e-05	3.51421e-05	3.72333e-05	4.66163e-05
Kineosporiaceae	0.000107312	0.000137253	0.000158501	0.000161489	0.000193614	0.000194182	0.000227201	0.000181014	0.000110969	0.000127178	0.000124464	0.000114084	0.00013807	0.000132186	0.00016672	0.000128107	0.000204529	0.000227009	0.000157857	0.000217121	0.000423098	0.000370031	0.000614449	0.000478286
Kiritimatiellaceae	6.34982e-06	9.3535e-06	5.94316e-06	8.25546e-06	6.33179e-06	6.11734e-06	7.51815e-06	3.75476e-06	2.55637e-06	5.44989e-06	4.98833e-06	5.08448e-06	7.37649e-06	4.71762e-06	4.10339e-06	6.09907e-06	4.57802e-06	4.55329e-06	2.38587e-06	4.19886e-06	2.45186e-06	4.41151e-06	3.10338e-06	3.95005e-06
Kofleriaceae	0.00433161	0.00545513	0.00609549	0.00456341	0.00453275	0.00419098	0.00544758	0.00369416	0.00298801	0.00388052	0.00311022	0.00325557	0.00411021	0.00375815	0.00473084	0.00455778	0.00245135	0.00193649	0.00166687	0.00228625	0.00516916	0.00289	0.00401085	0.00360944
Kordiimonadaceae	1.54525e-05	1.11334e-05	1.45055e-05	1.29451e-05	8.09575e-06	1.32884e-05	1.65593e-05	1.31557e-05	1.4688e-05	1.54237e-05	1.87462e-05	1.62552e-05	1.60948e-05	1.36523e-05	1.416e-05	1.25563e-05	1.45363e-05	2.25656e-05	1.2304e-05	1.74566e-05	1.55153e-05	1.03195e-05	1.49152e-05	1.13349e-05
Kosmotogaceae	3.12992e-06	3.8181e-06	5.37017e-06	5.43481e-06	5.42415e-06	2.83242e-06	4.77483e-06	4.04388e-06	3.74472e-06	7.42649e-06	5.17763e-06	6.37772e-06	4.68984e-06	5.69382e-06	4.81105e-06	5.20867e-06	4.76848e-06	3.54697e-06	5.72873e-06	3.96387e-06	4.07866e-06	3.64031e-06	2.91993e-06	3.35737e-06
Kribbellaceae	1.24481e-05	9.82284e-06	3.74865e-05	9.1009e-06	1.6744e-05	2.4611e-05	1.69914e-05	2.12148e-05	1.24298e-05	7.44263e-06	1.0928e-05	1.11312e-05	9.71473e-06	9.94077e-06	1.0802e-05	8.04068e-06	1.13946e-05	1.66522e-05	9.21158e-06	2.80379e-05	1.28437e-05	6.4947e-06	9.03458e-06	9.92555e-06
Ktedonobacteraceae	0.00110005	0.00160426	0.000753869	0.0015834	0.00157477	0.00176094	0.00223448	0.00161401	0.000691819	0.00092351	0.000741198	0.000744837	0.00146688	0.00151039	0.00134454	0.00138703	0.000311585	0.000270449	0.000243603	0.000254146	0.000455092	0.000301463	0.00041939	0.000443197
Ktedonosporobacteraceae	0.000181047	0.000247895	0.000125512	0.000241911	0.000252695	0.000270769	0.00064713	0.000246947	0.00011024	0.000137897	0.000117434	0.000111779	0.000230078	0.000260159	0.000206167	0.000228014	5.54621e-05	3.76574e-05	3.89696e-05	4.27658e-05	7.67332e-05	5.17181e-05	6.42281e-05	6.68671e-05
Labilitrichaceae	0.000714081	0.00119949	0.000728701	0.000934663	0.00115875	0.00119351	0.00120453	0.001043	0.000431697	0.000473088	0.00042367	0.000422837	0.000754563	0.000713878	0.000802757	0.000836249	0.000366479	0.000433221	0.000409456	0.000342461	0.000343478	0.000293909	0.000389664	0.000436457
Lachnaceae	3.17742e-07	3.85364e-07	2.72609e-07	4.52457e-07	2.07724e-06	3.95966e-07	6.67234e-07	1.68895e-06	1.11582e-07	8.94149e-07	5.37084e-07	9.63241e-07	3.69312e-07	2.13024e-06	3.61331e-07	7.80329e-07	3.96883e-07	5.39001e-07	1.63689e-07	1.33408e-06	6.68547e-07	1.76075e-06	2.01518e-06	6.23322e-07
Lachnospiraceae	5.06064e-05	5.99948e-05	5.09843e-05	5.38384e-05	5.07148e-05	5.07379e-05	5.44468e-05	4.26298e-05	6.12981e-05	6.1856e-05	4.82807e-05	5.75446e-05	5.78454e-05	5.83328e-05	5.81408e-05	5.48593e-05	5.26106e-05	5.30123e-05	4.74086e-05	4.90555e-05	5.0717e-05	5.05985e-05	4.61213e-05	5.3373e-05
Lacipirellulaceae	7.99697e-05	0.000108042	0.000102448	9.99446e-05	0.00010464	9.30553e-05	9.56568e-05	9.31835e-05	0.000102236	9.54402e-05	9.75208e-05	0.000100783	0.000104887	9.41454e-05	0.000123034	0.000107411	9.56476e-05	9.2046e-05	0.000209603	8.28669e-05	8.08757e-05	5.93011e-05	6.68307e-05	8.92468e-05
Lactobacillaceae	3.97149e-05	5.17588e-05	6.52412e-05	2.92156e-05	8.34978e-05	5.04397e-05	2.66309e-05	8.50908e-05	0.000113808	0.000178783	6.09221e-05	0.000192104	0.000115217	0.000400923	8.78113e-05	0.000114235	0.000156876	0.000290933	0.000262036	0.000351098	9.85967e-05	0.00055228	0.000372155	0.000149876
Laetiporaceae	0	0	8.3446e-07	5.75634e-07	1.59776e-07	1.35403e-07	6.83983e-08	2.97014e-07	7.11788e-07	1.33352e-06	1.41993e-06	1.10644e-06	6.24212e-07	2.63464e-06	6.02343e-07	1.3653e-06	2.1659e-06	2.89127e-06	2.41861e-06	3.97012e-06	5.4355e-07	6.89218e-06	3.82187e-06	1.01036e-06
Legeriomycetaceae	3.55972e-06	3.54428e-06	3.29748e-06	1.62025e-06	4.77055e-06	1.735e-06	2.94231e-06	3.5338e-06	9.48712e-06	9.12642e-06	5.55509e-06	7.83478e-06	5.92808e-06	1.05805e-05	3.48779e-06	5.31459e-06	8.28047e-06	8.65792e-06	1.07132e-05	1.11565e-05	9.99987e-06	2.11681e-05	1.05892e-05	5.92955e-06
Legionellaceae	7.42947e-05	9.05422e-05	9.46842e-05	9.76713e-05	9.22056e-05	9.16381e-05	9.71589e-05	8.47167e-05	9.15993e-05	9.79261e-05	9.45323e-05	9.68602e-05	9.86823e-05	8.73708e-05	8.77259e-05	0.000104152	5.84588e-05	6.99284e-05	6.78857e-05	5.83867e-05	7.02435e-05	5.71663e-05	5.99521e-05	7.02805e-05
Lentimicrobiaceae	1.04058e-05	1.4074e-05	1.40539e-05	1.15994e-05	1.11381e-05	1.3141e-05	1.12126e-05	1.07346e-05	1.298e-05	1.41543e-05	1.08473e-05	1.28606e-05	1.5885e-05	1.01379e-05	1.08091e-05	1.22051e-05	1.10817e-05	8.38429e-06	9.92474e-06	7.55538e-06	1.82485e-05	9.38842e-06	7.29925e-06	1.08501e-05
Lentisphaeraceae	2.14032e-06	1.5459e-06	3.25019e-06	2.94337e-06	2.96608e-06	2.24475e-06	2.63006e-06	1.61673e-06	3.37165e-06	4.48858e-06	4.38822e-06	3.58824e-06	1.8675e-06	2.37479e-06	2.69648e-06	2.69635e-06	1.6022e-06	2.82932e-06	2.41751e-06	2.4863e-06	2.40469e-06	1.80296e-06	2.21961e-06	2.49838e-06
Lentitheciaceae	0	1.99697e-07	0	4.68682e-09	2.83559e-07	0	5.19827e-07	0	2.92372e-07	5.33819e-07	2.66166e-07	5.93526e-07	1.40082e-07	2.06115e-06	6.51336e-07	7.99541e-07	1.85513e-07	0	2.15134e-07	2.20228e-07	7.02502e-07	1.59137e-07	3.29738e-07	1.01058e-07
Leotiaceae	7.47024e-08	7.92564e-07	4.81445e-07	7.28792e-07	1.37722e-06	7.09129e-07	4.21482e-07	1.28305e-06	2.74969e-07	1.85566e-07	4.30663e-07	1.6609e-07	0	1.1607e-06	0	0	2.31891e-07	1.7567e-06	9.41212e-07	1.25046e-06	1.05057e-07	8.95145e-07	4.32781e-07	1.14292e-07
Leptolyngbyaceae	0.000372184	0.000363578	0.000395844	0.000394898	0.000371517	0.000396052	0.000403386	0.00035458	0.000362982	0.000360733	0.000407295	0.000383797	0.000352295	0.000337722	0.000403226	0.000355313	0.000356449	0.000329739	0.000340596	0.000339311	0.00038805	0.000344785	0.000349493	0.000367864
Leptosphaeriaceae	1.09772e-06	1.07991e-06	1.02272e-06	5.20127e-07	9.89236e-07	1.56082e-06	2.16412e-06	1.25044e-06	8.39882e-07	9.77609e-07	4.71372e-07	1.11331e-06	9.03738e-07	1.80495e-06	1.29187e-06	6.2025e-07	7.43467e-08	1.61194e-07	7.7074e-07	1.49673e-06	1.97142e-07	9.51866e-07	3.27804e-07	2.36079e-07
Leptospiraceae	6.56054e-05	8.33988e-05	8.56692e-05	8.67983e-05	7.98286e-05	7.99689e-05	8.24234e-05	7.47206e-05	7.23481e-05	7.10109e-05	6.93958e-05	7.51986e-05	8.43139e-05	7.0217e-05	8.36664e-05	8.43766e-05	8.78912e-05	6.40478e-05	6.05363e-05	6.30147e-05	8.17939e-05	5.66782e-05	5.69794e-05	6.5841e-05
Leptotrichiaceae	3.49301e-06	3.99809e-06	2.47207e-06	5.23945e-06	2.47078e-06	2.9252e-06	3.05772e-06	2.7682e-06	3.93127e-06	4.10288e-06	3.23301e-06	5.21558e-06	2.67408e-06	3.52684e-06	4.00308e-06	3.30592e-06	3.16015e-06	3.42123e-06	3.4904e-06	3.92834e-06	3.31116e-06	2.85027e-06	2.71496e-06	3.9763e-06
Leuconostocaceae	4.55442e-07	1.75045e-06	1.34504e-06	2.59092e-06	1.11394e-06	9.15118e-07	7.74059e-07	2.42975e-06	1.5328e-06	9.78458e-07	1.58826e-06	9.88182e-07	6.95421e-07	8.26792e-07	1.67573e-06	1.31177e-06	9.0751e-07	1.00383e-06	8.08179e-07	2.2755e-06	1.79882e-06	6.06556e-07	1.87101e-06	2.58949e-06
Leucosporidiaceae	0	5.40276e-07	0	0	0	0	1.06814e-07	0	0	2.86009e-07	0	0	6.42577e-08	1.66431e-07	0	0	8.93524e-08	5.7132e-07	3.10859e-07	9.59709e-08	0	7.66485e-08	2.38228e-07	0
Lewinellaceae	4.49696e-05	3.8525e-05	4.86325e-05	3.0736e-05	3.54427e-05	3.73494e-05	3.56406e-05	3.40244e-05	4.72898e-05	5.28335e-05	5.71892e-05	5.36923e-05	5.5611e-05	4.37451e-05	6.14953e-05	4.71519e-05	7.29283e-05	7.97235e-05	7.53379e-05	6.27141e-05	6.18743e-05	5.00371e-05	4.78653e-05	5.20758e-05
Lichenibacteriaceae	1.51904e-05	2.09192e-05	1.86303e-05	2.01445e-05	1.94625e-05	1.71898e-05	1.90916e-05	1.73874e-05	1.24831e-05	1.42378e-05	1.69395e-05	1.50357e-05	1.77067e-05	1.79207e-05	1.50475e-05	1.47515e-05	1.78326e-05	1.64275e-05	1.7893e-05	1.82789e-05	1.18956e-05	1.2288e-05	1.47308e-05	1.72603e-05
Lichenihabitantaceae	9.22182e-06	1.64971e-05	9.02302e-06	1.30839e-05	1.38322e-05	1.16763e-05	1.48743e-05	1.04915e-05	8.93542e-06	8.87617e-06	9.97773e-06	9.48891e-06	1.14652e-05	7.75298e-06	9.5317e-06	1.08748e-05	8.65635e-06	9.39498e-06	9.37541e-06	1.14728e-05	9.19438e-06	6.12018e-06	7.43994e-06	9.91299e-06
Lichtheimiaceae	1.58402e-06	9.56168e-07	1.76024e-06	6.02627e-07	1.72187e-06	1.70214e-06	1.71631e-06	1.60908e-06	8.26486e-06	7.39674e-06	3.80533e-06	4.88243e-06	1.50732e-06	4.87536e-06	1.92965e-06	1.47036e-06	4.07195e-06	3.48937e-06	5.09329e-06	6.92413e-06	2.90452e-06	1.0521e-05	4.55118e-06	2.88599e-06
Limnochordaceae	1.07193e-05	8.14196e-06	9.53175e-06	7.65254e-06	8.68744e-06	1.08447e-05	1.07636e-05	7.04105e-06	1.11237e-05	9.40862e-06	1.24233e-05	1.25723e-05	1.08653e-05	9.39272e-06	1.21948e-05	1.14617e-05	1.63433e-05	1.27565e-05	1.3629e-05	1.04436e-05	1.48912e-05	9.45659e-06	1.06424e-05	1.23537e-05
Lindgomycetaceae	3.88452e-07	1.9424e-07	4.72724e-07	7.84081e-07	3.44017e-07	0	6.01247e-07	1.01387e-07	5.31772e-07	3.65633e-07	1.4974e-06	7.75086e-08	4.08266e-07	3.44082e-07	1.09954e-06	1.06541e-06	9.08049e-07	0	1.25048e-06	4.68395e-07	1.19254e-07	0	2.41599e-07	0
Lineolataceae	0	0	0	0	0	0	0	0	0	0	0	0	0	0	2.72906e-07	0	0	0	0	0	0	0	0	0
Lipomycetaceae	7.89193e-07	6.26339e-07	9.43702e-07	1.75687e-07	7.77035e-07	5.0771e-07	1.06814e-07	8.63322e-07	1.34701e-06	1.07483e-06	5.20368e-07	2.17964e-06	6.33223e-07	1.87255e-06	5.94111e-07	8.92633e-07	1.51969e-06	1.19717e-06	2.057e-06	2.22259e-06	1.02518e-06	3.76338e-06	1.96539e-06	7.05413e-07
Listeriaceae	8.3722e-06	1.70122e-05	2.07289e-05	4.09779e-06	1.36946e-05	7.9613e-06	4.67181e-06	1.20191e-05	2.21157e-05	3.04759e-05	1.31158e-05	1.96932e-05	1.68356e-05	7.747e-05	1.05444e-05	1.44776e-05	1.80614e-05	3.67477e-05	2.6474e-05	3.24869e-05	1.35604e-05	4.91205e-05	3.34214e-05	2.08585e-05
Litoricolaceae	1.19728e-07	7.15995e-07	8.35099e-07	4.63279e-07	1.91474e-07	3.8614e-07	9.71374e-07	7.28414e-08	2.1869e-07	1.19712e-06	6.57752e-07	4.47528e-07	4.89939e-07	7.07369e-07	6.97722e-08	1.26575e-06	2.66833e-07	1.54569e-07	4.64159e-07	1.40858e-06	2.97223e-07	6.32499e-07	3.85234e-07	6.4878e-07
Longimicrobiaceae	0.000434987	0.000382034	0.000469748	0.000686774	0.000879719	0.00044832	0.000448207	0.000396698	0.000419843	0.000493239	0.000751484	0.000426847	0.000399585	0.000395243	0.000546547	0.000576822	0.000413462	0.000553823	0.000356754	0.000449127	0.000582129	0.000434108	0.000477074	0.000636378
Lophiostomataceae	2.57064e-07	3.33297e-07	3.28952e-07	1.1682e-07	9.58508e-08	9.56317e-07	3.89081e-07	3.92092e-07	6.957e-07	1.03557e-06	6.82485e-07	0	3.003e-07	1.03762e-06	1.96653e-07	0	8.77425e-08	1.13975e-07	9.29528e-08	0	3.37285e-07	7.4505e-07	1.44813e-06	3.69252e-07
Lophiotremataceae	3.49607e-07	1.26208e-07	6.44387e-07	3.50868e-07	1.08887e-07	8.12417e-08	1.43204e-06	4.27214e-07	1.7905e-07	1.06076e-06	1.12638e-06	5.8628e-07	6.02433e-07	9.14052e-07	1.40962e-06	6.0652e-07	8.20895e-07	4.82419e-07	5.30192e-07	6.68412e-07	3.95533e-07	6.19122e-07	5.10348e-07	4.80027e-07
Lyophyllaceae	4.74013e-07	2.42794e-06	2.66904e-06	1.45967e-06	7.47157e-07	7.30471e-07	5.45807e-07	2.53964e-06	4.27315e-06	6.37624e-06	2.03852e-06	7.44764e-06	6.23817e-06	1.35516e-05	3.87255e-06	3.66129e-06	7.63733e-06	8.81213e-06	1.0217e-05	1.20668e-05	5.32172e-06	2.23302e-05	1.21554e-05	3.67025e-06
Magnaporthaceae	7.52693e-07	6.91932e-08	1.35225e-06	3.19702e-07	6.60342e-07	6.52846e-07	1.43508e-06	8.37687e-07	6.23489e-07	6.93799e-07	7.7866e-07	2.63529e-07	6.24814e-07	9.1545e-07	1.48594e-07	5.91122e-07	6.26025e-07	5.45815e-07	8.79618e-07	1.228e-06	4.27234e-07	1.08688e-06	1.10969e-07	3.13537e-07
Magnetococcaceae	8.7052e-06	1.02711e-05	9.08105e-06	1.19964e-05	7.21187e-06	8.56518e-06	9.02336e-06	8.15262e-06	1.06292e-05	8.1253e-06	7.10655e-06	9.09375e-06	7.02749e-06	7.24361e-06	1.00802e-05	1.16892e-05	7.52725e-06	1.02723e-05	6.84998e-06	8.70808e-06	8.81647e-06	7.08749e-06	7.25706e-06	8.73309e-06
Malasseziaceae	1.57739e-06	1.33905e-06	2.78591e-06	1.77571e-06	2.40799e-06	3.13607e-06	1.21526e-06	2.01332e-06	7.44583e-07	2.49883e-06	1.99974e-06	3.91163e-07	7.59505e-07	1.90446e-06	1.00906e-06	1.32458e-06	4.00402e-07	6.91775e-07	1.37165e-06	7.83754e-07	1.10538e-06	3.44e-06	2.53096e-06	7.2251e-07
Marasmiaceae	7.61959e-07	5.71899e-07	4.55743e-07	1.27838e-06	8.07975e-07	2.82007e-07	2.36143e-06	1.19388e-06	2.9873e-06	2.19407e-06	1.66484e-06	2.53685e-06	1.17048e-06	2.51121e-06	5.43646e-07	1.05663e-06	1.40811e-06	2.249e-06	2.60986e-06	2.94575e-06	4.81665e-06	1.13824e-05	2.81316e-06	3.93327e-06
Marinifilaceae	7.07689e-06	6.98226e-06	1.7284e-05	1.02939e-05	1.24946e-05	8.3704e-06	1.0133e-05	9.52858e-06	2.11177e-05	1.81201e-05	1.18143e-05	1.7145e-05	1.99728e-05	1.70764e-05	1.65982e-05	1.48912e-05	3.27546e-05	2.17496e-05	1.8567e-05	2.02747e-05	1.54442e-05	2.34876e-05	1.66149e-05	9.26142e-06
Marinilabiliaceae	2.39481e-05	2.29637e-05	3.79098e-05	1.74157e-05	3.79492e-05	2.57143e-05	2.6535e-05	5.59995e-05	0.000121932	0.000131366	4.60912e-05	0.000194027	8.02191e-05	0.000239574	5.48428e-05	7.72221e-05	0.000122669	0.000156552	0.000157774	0.000228761	6.74242e-05	0.000348811	0.000240585	0.000107844
Mariprofundaceae	1.63416e-05	1.79893e-05	1.68463e-05	1.65964e-05	1.84255e-05	1.53201e-05	1.41707e-05	1.29646e-05	2.0961e-05	1.49701e-05	2.11618e-05	1.75732e-05	1.71856e-05	1.63627e-05	1.78313e-05	1.50104e-05	1.53034e-05	1.12724e-05	1.14111e-05	1.43232e-05	2.1601e-05	1.12836e-05	1.6364e-05	1.39399e-05
Marivirgaceae	4.28076e-05	8.45087e-05	9.72704e-05	5.8541e-05	5.12321e-05	4.9894e-05	0.000171217	5.17132e-05	7.49286e-05	0.000137028	7.28296e-05	7.57181e-05	6.55766e-05	6.5932e-05	6.11206e-05	7.25354e-05	9.74703e-05	0.000104804	0.000257257	8.90975e-05	8.32246e-05	4.2755e-05	3.7004e-05	6.02536e-05
Marseilleviridae	3.14961e-07	5.92803e-07	8.36467e-07	9.89898e-07	3.60018e-07	2.78125e-07	2.83875e-07	1.7148e-07	5.35601e-07	2.25906e-07	1.01805e-06	6.62367e-07	9.82064e-07	1.07126e-06	3.02445e-07	5.22314e-07	0	0	3.27378e-07	6.85065e-07	5.1885e-07	4.59786e-07	1.50371e-07	1.72983e-07
Massarinaceae	0	4.77796e-07	3.24184e-07	0	0	1.04297e-07	5.77586e-07	1.01387e-07	4.16169e-07	4.15741e-07	5.68822e-07	2.86676e-07	5.60327e-07	0	0	1.00414e-06	0	4.51343e-07	0	6.58253e-07	5.5502e-08	0	4.84859e-07	3.78969e-07
Melampsoraceae	8.5688e-08	1.53166e-07	1.39207e-07	1.1682e-07	4.44431e-07	4.53998e-07	1.51406e-07	2.24878e-07	1.14717e-06	2.50385e-07	4.34512e-07	8.37814e-07	5.17365e-07	7.72787e-07	4.8033e-07	6.5814e-07	1.04338e-06	4.85931e-07	6.76188e-07	1.59707e-07	2.59604e-07	2.09826e-06	2.19323e-06	1.86418e-07
Melanommataceae	5.77254e-07	1.70166e-07	1.0214e-07	6.06394e-08	4.92625e-07	2.37518e-07	9.01727e-07	4.10703e-07	6.95382e-07	4.43027e-07	9.76872e-07	6.05445e-07	2.48553e-07	1.02532e-06	8.74066e-07	2.9153e-07	0	8.61341e-08	0	2.58292e-07	4.16373e-07	6.18866e-07	0	2.63029e-07
Melioribacteraceae	1.55052e-05	1.51501e-05	1.30154e-05	1.59579e-05	1.48796e-05	1.57539e-05	1.39841e-05	1.29266e-05	1.364e-05	1.79991e-05	1.39736e-05	1.78107e-05	1.76642e-05	1.40857e-05	1.49979e-05	1.52384e-05	1.39073e-05	1.11333e-05	1.4176e-05	1.22931e-05	1.88165e-05	1.59104e-05	1.53163e-05	1.25531e-05
Merismopediaceae	2.40213e-05	2.61231e-05	2.48864e-05	2.61275e-05	2.54945e-05	3.36428e-05	2.78681e-05	3.04905e-05	2.6887e-05	2.65604e-05	3.10171e-05	2.26593e-05	2.60682e-05	2.44262e-05	2.43372e-05	2.41389e-05	2.67078e-05	2.75647e-05	2.96344e-05	2.66401e-05	2.74397e-05	2.6989e-05	2.34605e-05	2.69986e-05
Meruliaceae	0	2.33564e-07	6.73753e-07	8.7006e-07	2.64189e-07	6.77014e-08	2.38696e-07	3.29064e-08	4.5087e-07	1.7514e-07	3.60188e-07	4.45623e-07	1.70831e-07	1.31913e-06	0	0	1.80415e-07	7.26972e-07	1.31937e-06	1.11804e-06	6.57168e-07	3.4089e-06	9.83043e-07	8.89019e-07
Mesoaciditogaceae	2.41082e-07	2.87581e-07	1.05054e-06	4.38338e-07	3.71722e-07	1.40274e-06	4.75844e-07	3.00562e-07	5.34662e-08	2.16493e-07	4.88422e-07	2.457e-07	5.37344e-07	0	8.77539e-07	6.31631e-07	3.74593e-07	1.4283e-07	0	5.07554e-07	1.1031e-07	1.16755e-06	0	2.0241e-07
Metaviridae	0	0	0	1.65495e-07	0	7.0807e-08	0	0	1.11582e-07	1.65018e-06	0	5.52322e-07	1.45919e-07	2.23423e-07	4.16611e-07	0	4.62115e-07	0	1.17652e-07	1.51606e-07	1.30572e-06	0	0	3.83022e-07
Methanobacteriaceae	9.24969e-06	1.21751e-05	1.23258e-05	1.1782e-05	1.22542e-05	1.18399e-05	1.21934e-05	9.46894e-06	1.31272e-05	1.67332e-05	1.80729e-05	1.82292e-05	1.24435e-05	1.32908e-05	1.78685e-05	1.43445e-05	1.02565e-05	1.38285e-05	1.18703e-05	1.1808e-05	1.03975e-05	1.21395e-05	1.11964e-05	1.27575e-05
Methanocalculaceae	6.14803e-07	5.92413e-07	1.09436e-06	8.45656e-07	8.09259e-07	4.82076e-07	1.32937e-06	1.05927e-06	1.10571e-06	1.2671e-06	1.99305e-06	6.52446e-07	7.27891e-07	8.36826e-07	2.46243e-06	5.01669e-07	6.53401e-07	8.67967e-07	7.0792e-07	2.32463e-07	1.09396e-06	6.30767e-07	9.39155e-07	2.21398e-06
Methanocaldococcaceae	2.68456e-06	1.8049e-06	1.57175e-06	1.40971e-06	2.37967e-06	2.52079e-06	1.69798e-06	1.30307e-06	2.9138e-06	1.8579e-06	2.70468e-06	1.88126e-06	1.17221e-06	2.64138e-06	2.77899e-06	1.16861e-06	1.74988e-06	8.03842e-07	2.21613e-06	1.59686e-06	1.61892e-06	9.8797e-07	1.65145e-06	2.90972e-06
Methanocellaceae	1.07026e-05	1.04375e-05	9.16801e-06	6.9664e-06	7.85308e-06	1.10841e-05	8.02123e-06	8.44279e-06	7.54085e-06	9.18584e-06	1.02524e-05	1.04395e-05	1.13704e-05	9.64949e-06	1.06854e-05	1.02342e-05	9.47861e-06	1.0198e-05	5.89324e-06	7.51708e-06	7.84128e-06	9.57333e-06	8.9616e-06	9.28861e-06
Methanococcaceae	1.12189e-06	7.39269e-07	6.60534e-07	2.17637e-07	1.14063e-06	2.09205e-06	1.8056e-06	6.09073e-07	1.71109e-06	1.45476e-06	9.45119e-07	1.32053e-06	1.12781e-06	1.73641e-06	6.41434e-07	1.21636e-06	2.78591e-07	5.79602e-07	8.01832e-07	9.34003e-08	8.53592e-07	3.29905e-07	5.31403e-07	1.57901e-06
Methanocorpusculaceae	2.2127e-07	6.32734e-07	6.31884e-08	6.732e-08	1.65319e-06	7.2928e-07	0	1.03032e-06	3.20797e-07	0	3.14025e-07	0	0	1.7415e-07	6.11833e-07	5.23038e-07	6.41213e-07	3.01377e-07	0	0	8.21767e-07	2.53172e-07	8.74305e-08	3.30092e-07
Methanomassiliicoccaceae	2.72723e-06	4.48514e-06	4.11761e-06	3.9548e-06	4.91804e-06	3.6283e-06	6.62974e-06	3.1757e-06	1.56602e-06	3.95074e-06	5.03745e-06	5.7614e-06	4.24348e-06	3.89655e-06	1.92969e-06	4.09717e-06	2.23838e-06	1.85565e-06	2.91248e-06	1.44875e-06	2.08035e-06	1.47474e-06	2.96083e-06	3.37657e-06
Methanomicrobiaceae	2.23507e-05	2.00736e-05	2.13847e-05	2.46088e-05	2.02634e-05	1.73385e-05	1.96576e-05	1.88792e-05	1.81467e-05	2.08961e-05	2.67178e-05	2.31983e-05	2.40954e-05	2.32025e-05	2.36855e-05	1.90081e-05	2.35952e-05	1.9345e-05	2.04348e-05	1.91567e-05	2.67673e-05	2.2813e-05	2.22682e-05	2.41926e-05
Methanonatronarchaeaceae	0	0	0	6.8078e-07	0	0	0	0	0	0	3.7683e-07	2.7536e-07	0	4.89174e-07	0	0	1.09432e-07	2.77806e-07	9.23434e-08	6.63869e-07	0	1.48605e-07	0	2.66682e-07
Methanopyraceae	0	0	0	0	0	0	0	0	0	0	0	0	0	0	0	0	0	0	1.17652e-07	0	1.83851e-07	4.3514e-07	0	0
Methanoregulaceae	1.44488e-05	1.6108e-05	1.84729e-05	1.62957e-05	1.8318e-05	1.74555e-05	1.34249e-05	1.62075e-05	1.57945e-05	1.3592e-05	1.63523e-05	1.65971e-05	1.64068e-05	1.26979e-05	1.49424e-05	1.78486e-05	1.10748e-05	1.13498e-05	1.43098e-05	1.11085e-05	1.31305e-05	1.10772e-05	1.11891e-05	1.1046e-05
Methanosarcinaceae	5.26078e-05	5.43136e-05	5.87852e-05	5.80771e-05	4.91117e-05	5.8503e-05	5.54306e-05	5.64596e-05	5.42376e-05	5.37768e-05	7.10813e-05	5.67363e-05	5.48813e-05	4.74256e-05	4.95629e-05	5.30673e-05	4.8784e-05	3.8924e-05	4.59636e-05	4.84836e-05	5.75945e-05	4.81966e-05	4.83694e-05	5.61306e-05
Methanospirillaceae	2.78589e-06	4.35098e-06	2.44991e-06	4.78086e-06	3.25973e-06	4.13794e-06	2.48138e-06	2.69107e-06	3.64514e-06	5.02411e-06	3.25883e-06	3.81121e-06	3.39431e-06	3.72063e-06	3.91569e-06	4.95859e-06	1.68305e-06	7.77388e-07	4.90651e-06	2.76033e-06	5.80457e-06	1.89628e-06	3.11116e-06	2.82294e-06
Methanothermaceae	3.2371e-07	1.46075e-07	6.90392e-08	7.35533e-08	0	1.05725e-07	4.27255e-07	1.38938e-07	0	0	0	0	6.48527e-08	6.28874e-08	0	6.75538e-08	0	0	0	0	0	1.54716e-07	0	3.55576e-07
Methanotrichaceae	2.36496e-05	2.44027e-05	3.03072e-05	2.91656e-05	2.71063e-05	2.47657e-05	2.38328e-05	2.62328e-05	2.8557e-05	2.91902e-05	2.66445e-05	2.42615e-05	3.12486e-05	2.55555e-05	2.64278e-05	2.50312e-05	3.11212e-05	2.94882e-05	2.8726e-05	2.83703e-05	2.69247e-05	2.12008e-05	2.32081e-05	2.69427e-05
Methermicoccaceae	2.02159e-07	4.14751e-07	5.61841e-07	5.19479e-07	5.61925e-07	5.14675e-07	2.57383e-07	1.19763e-06	3.01006e-07	1.19904e-07	4.43329e-07	8.63626e-07	5.34286e-07	5.3551e-07	5.09938e-07	7.98517e-07	1.18773e-07	0	0	0	4.9921e-07	0	3.22082e-07	3.42681e-07
Methylacidiphilaceae	2.20513e-06	3.71904e-06	1.91733e-06	3.35262e-06	2.75532e-06	2.8951e-06	1.88674e-06	4.88387e-06	3.16625e-06	8.71305e-07	2.78983e-06	1.3392e-06	2.35753e-06	2.99925e-06	1.73485e-06	2.68797e-06	1.72285e-06	1.537e-06	2.63607e-06	2.98223e-06	3.08482e-06	1.58536e-06	1.90293e-06	2.01348e-06
Methylobacteriaceae	0.000961553	0.000919284	0.000962029	0.0010167	0.000879211	0.000848682	0.000918223	0.000878923	0.0008878	0.000806494	0.000973223	0.000863409	0.000920152	0.000811854	0.000877606	0.000869011	0.00106588	0.00109323	0.00100194	0.000954251	0.000942515	0.000769399	0.000915947	0.00100454
Methylococcaceae	0.000825496	0.000807618	0.000877306	0.00090902	0.000806437	0.000802336	0.000895013	0.000824277	0.000779438	0.000749428	0.000808678	0.000797392	0.000799152	0.000719869	0.00080177	0.000780306	0.000755951	0.000725265	0.000731071	0.000691428	0.000777511	0.000654288	0.000709534	0.000794528
Methylocystaceae	0.000265643	0.000285649	0.000272217	0.000289459	0.000260784	0.0002467	0.000277964	0.000267969	0.000234383	0.000217918	0.000264777	0.000224378	0.000253374	0.00024208	0.000240691	0.000247542	0.000287059	0.000297028	0.00025931	0.000237905	0.000215493	0.000163352	0.000208375	0.000234301
Methylophilaceae	0.000247063	0.000341946	0.000301616	0.000249888	0.000229973	0.000195821	0.00019328	0.000253013	0.000238894	0.000210318	0.000216162	0.000223399	0.000238214	0.000254524	0.000205005	0.000274528	0.000227604	0.000235506	0.000209793	0.000203499	0.000191199	0.000189365	0.000195128	0.000216513
Methylothermaceae	1.84148e-05	1.63877e-05	1.64076e-05	1.47133e-05	1.55017e-05	1.43676e-05	2.03667e-05	1.53684e-05	1.89841e-05	1.66708e-05	1.65168e-05	1.72727e-05	1.68094e-05	1.69554e-05	1.81793e-05	1.62568e-05	1.49787e-05	1.37356e-05	1.18085e-05	1.47488e-05	1.03197e-05	1.32313e-05	1.67682e-05	1.18021e-05
Metschnikowiaceae	1.39459e-05	1.34562e-05	1.12747e-05	1.18142e-05	1.35711e-05	1.41973e-05	1.2066e-05	1.37176e-05	8.82894e-06	8.90302e-06	7.9399e-06	7.15286e-06	7.78219e-06	9.06995e-06	6.34849e-06	8.62616e-06	1.32716e-06	1.50153e-06	2.6225e-06	1.18519e-06	7.23892e-07	1.99412e-06	2.05545e-06	7.82566e-07
Microascaceae	5.36374e-07	3.15521e-07	5.93883e-07	2.11833e-07	9.13468e-07	3.17176e-07	7.64217e-07	5.66453e-07	5.64966e-07	3.03653e-07	1.07772e-05	1.12615e-06	0	1.49393e-07	4.78009e-07	1.02941e-06	0	1.48368e-06	1.42961e-06	8.10631e-07	0	1.08502e-07	2.38962e-06	5.08839e-07
Microbacteriaceae	0.000401522	0.000459474	0.000567634	0.000489134	0.000522319	0.000532804	0.000538956	0.000569494	0.000520634	0.000553478	0.000502753	0.000487278	0.000524461	0.000695459	0.000545886	0.000522825	0.000527626	0.000542834	0.000492651	0.00050392	0.000503577	0.000449145	0.000502016	0.000490656
Microbotryaceae	3.2588e-07	4.91437e-07	1.24604e-06	5.5165e-08	5.86181e-07	3.8809e-07	5.15624e-07	1.37228e-06	1.62346e-06	3.3632e-06	9.63239e-07	2.36446e-06	1.06142e-06	6.72393e-06	1.99213e-06	3.04615e-06	2.26563e-06	4.94791e-06	3.793e-06	7.0417e-06	2.639e-06	1.19348e-05	5.8058e-06	2.9465e-06
Microbulbiferaceae	4.41619e-05	4.56233e-05	4.13017e-05	5.27663e-05	3.81061e-05	3.58677e-05	5.16683e-05	4.39964e-05	3.68505e-05	4.39594e-05	4.88355e-05	4.11226e-05	5.03778e-05	4.72204e-05	4.65145e-05	4.95614e-05	4.54107e-05	5.20702e-05	4.57256e-05	4.4237e-05	4.78449e-05	3.41335e-05	4.26521e-05	4.564e-05
Micrococcaceae	0.000227788	0.000272158	0.000317519	0.000256303	0.000332939	0.000338783	0.000321594	0.000367729	0.000355569	0.000397605	0.000317814	0.000393936	0.000345827	0.000519238	0.000335457	0.000356758	0.000386931	0.000435433	0.000429025	0.00049312	0.000325325	0.00061541	0.000527756	0.000355405
Microcoleaceae	0.000286	0.000272987	0.000310903	0.000301437	0.000322878	0.00054589	0.000429054	0.000282061	0.000307698	0.000306219	0.000347776	0.000309703	0.000286756	0.000263876	0.00029494	0.00029009	0.000300586	0.000276857	0.000294611	0.000286198	0.000306961	0.000275702	0.000274824	0.000296278
Microcystaceae	8.51189e-05	8.14713e-05	9.45885e-05	9.60437e-05	8.75673e-05	8.36211e-05	8.73452e-05	8.17319e-05	7.81405e-05	8.57032e-05	0.00010241	9.52691e-05	7.44503e-05	8.32925e-05	7.95075e-05	8.12872e-05	8.57725e-05	8.16134e-05	6.90804e-05	7.53831e-05	9.37583e-05	7.18138e-05	7.63649e-05	9.32925e-05
Microdochiaceae	2.14491e-07	9.73831e-08	2.88269e-07	2.90625e-07	6.87415e-08	9.41214e-08	0	0	4.35904e-07	2.92641e-07	9.39595e-07	3.6043e-07	0	0	1.77445e-07	6.90242e-07	4.38248e-07	6.94818e-07	1.39439e-07	4.098e-07	1.16116e-07	6.92893e-07	5.70471e-07	4.86806e-07
Micromonosporaceae	0.00451615	0.00494361	0.0044646	0.00525579	0.0049662	0.00697816	0.00579393	0.0140201	0.00510932	0.0046673	0.00705943	0.00437745	0.00533342	0.00450169	0.00476077	0.00441541	0.00326755	0.00582822	0.00300683	0.00318932	0.00612611	0.00301097	0.00738686	0.00380767
Micropepsaceae	0.000570412	0.000679887	0.000710758	0.000652876	0.000967843	0.000903915	0.000898944	0.00113213	0.000381536	0.000349556	0.000341037	0.000328067	0.000651889	0.000617167	0.00048114	0.000671287	0.00049874	0.00048854	0.000462364	0.000385492	0.000403456	0.000315106	0.000459464	0.000482864
Microscillaceae	1.75048e-05	1.82354e-05	2.0922e-05	1.42941e-05	1.65407e-05	1.65946e-05	1.80372e-05	1.26271e-05	1.5499e-05	2.00655e-05	1.74891e-05	1.92565e-05	2.21255e-05	1.56684e-05	1.82128e-05	1.90802e-05	1.80863e-05	1.93776e-05	1.46771e-05	1.80828e-05	2.92638e-05	1.35207e-05	1.48123e-05	1.6962e-05
Microthrixaceae	2.24555e-05	1.46452e-05	1.56321e-05	1.85486e-05	3.05894e-05	2.79589e-05	2.7238e-05	2.48484e-05	2.3268e-05	3.2551e-05	2.30928e-05	2.1565e-05	2.13546e-05	1.76466e-05	2.19898e-05	2.16537e-05	3.55016e-05	3.50169e-05	3.39031e-05	2.93502e-05	2.09021e-05	1.85697e-05	1.51553e-05	1.90658e-05
Microthyriaceae	1.0163e-07	0	3.72812e-07	3.01662e-07	0	1.31992e-06	3.03795e-07	2.96158e-07	5.8967e-07	8.35279e-07	8.76349e-08	7.53816e-07	5.10307e-07	7.93249e-07	2.99439e-07	0	1.13249e-07	1.6353e-07	1.63689e-07	7.02176e-07	0	4.73177e-07	4.5387e-07	2.43052e-07
Microviridae	0	0	6.11075e-07	3.34474e-07	0	0	0	0	0	0	6.91431e-08	6.39979e-08	0	2.49242e-07	0	0	0	0	0	0	0	0	0	0
Mimiviridae	7.3995e-07	2.15458e-06	1.73513e-06	2.07021e-06	2.07933e-06	1.32019e-06	1.97164e-06	2.20564e-06	1.73859e-06	2.23045e-06	2.35425e-06	1.60768e-06	1.17543e-06	3.77352e-06	2.30726e-06	2.41454e-06	2.2178e-06	3.7234e-06	3.04589e-06	2.00139e-06	4.08686e-06	5.04279e-06	2.34239e-06	2.5398e-06
Minwuiaceae	6.3046e-06	1.1124e-05	4.55181e-06	5.77764e-06	8.46384e-06	7.2032e-06	7.49916e-06	7.17582e-06	7.80578e-06	7.57039e-06	8.13038e-06	7.67764e-06	8.07459e-06	6.84505e-06	8.80813e-06	5.80237e-06	1.07874e-05	7.05034e-06	5.69848e-06	1.37293e-05	3.17065e-06	4.30775e-06	5.53778e-06	6.59364e-06
Mitoviridae	8.49689e-07	2.97099e-07	9.59715e-07	4.45028e-08	2.99291e-07	1.09728e-06	5.50608e-07	1.99846e-06	5.65387e-06	6.38351e-06	2.06179e-06	5.99556e-06	3.42615e-06	1.5697e-05	2.8726e-06	2.41998e-06	6.90255e-06	7.75725e-06	7.83896e-06	1.45295e-05	2.87647e-06	1.97963e-05	1.41055e-05	3.93486e-06
Mixiaceae	0	2.99545e-07	2.83148e-07	1.10609e-06	1.72289e-07	4.88478e-07	7.89611e-07	5.74871e-07	4.87287e-07	3.45763e-07	1.67177e-07	0	0	8.81833e-07	1.16007e-06	1.1091e-06	1.23284e-07	1.4283e-07	0	5.63712e-07	4.46827e-07	4.23022e-07	9.30711e-08	3.64578e-07
Mollisiaceae	1.97537e-07	3.28383e-07	1.91311e-07	5.81596e-07	8.50676e-08	5.61386e-07	1.94935e-07	3.93119e-07	4.67807e-07	8.43523e-07	1.44597e-06	7.63043e-07	9.76538e-07	1.3363e-06	1.21559e-06	1.15559e-06	4.34795e-07	1.18921e-06	0	8.66613e-07	1.94909e-07	0	2.66942e-07	6.21082e-07
Moniliellaceae	0	0	0	0	4.09964e-07	9.29874e-08	9.39447e-08	0	0	0	0	8.40455e-08	0	0	0	0	0	0	0	0	0	0	0	0
Monoblepharidaceae	0	0	0	0	0	0	0	0	0	0	0	2.81281e-08	0	0	0	0	0	5.91478e-07	3.24445e-07	4.21808e-08	3.5584e-08	0	1.39607e-07	7.74238e-08
Moraxellaceae	0.000189619	0.000222978	0.000345431	0.000102677	0.000329585	0.000161722	0.000113916	0.000361156	0.000522419	0.000757598	0.000247385	0.00078541	0.000451538	0.00143957	0.000363567	0.000440137	0.000766481	0.00118172	0.00106036	0.00149881	0.000456693	0.00231578	0.00156184	0.000633591
Morchellaceae	7.80478e-07	5.9779e-07	7.61221e-07	3.82832e-07	1.29862e-06	4.86845e-07	7.91757e-07	6.73307e-07	9.29754e-07	2.90487e-07	4.58432e-07	1.16455e-06	9.47602e-07	1.92819e-06	4.82904e-07	1.04656e-06	1.09329e-06	2.5502e-07	6.13539e-07	1.50775e-06	3.88713e-07	7.44613e-07	3.36629e-07	7.60184e-07
Morganellaceae	2.7942e-05	2.3837e-05	3.47395e-05	2.31825e-05	3.44012e-05	3.0866e-05	3.65476e-05	6.44665e-05	7.36526e-05	9.85917e-05	4.08108e-05	0.000109016	7.07542e-05	0.000220981	5.09373e-05	6.73416e-05	0.000105959	0.000115331	0.000151809	0.000222645	5.80804e-05	0.000297354	0.000202365	8.37528e-05
Moritellaceae	4.09648e-06	1.68724e-06	4.01261e-06	3.98902e-06	3.39745e-06	3.14835e-06	3.33086e-06	6.12019e-06	7.1703e-06	6.069e-06	4.95963e-06	3.17823e-06	5.7241e-06	5.20107e-06	4.17787e-06	3.60511e-06	3.08126e-06	4.19e-06	2.39077e-06	3.80687e-06	7.56802e-06	4.21226e-06	4.18064e-06	5.0474e-06
Mortierellaceae	2.97407e-06	3.97795e-06	4.04152e-06	1.69583e-06	4.71192e-06	2.76881e-06	2.54584e-06	6.06332e-06	9.46106e-06	9.23468e-06	3.64293e-06	1.03949e-05	4.78439e-06	1.55866e-05	2.93663e-06	6.83685e-06	5.26715e-06	1.19842e-05	1.15195e-05	1.27791e-05	4.93669e-06	3.04948e-05	1.7917e-05	9.601e-06
Motilibacteraceae	5.51136e-05	7.71771e-05	8.96719e-05	8.2366e-05	0.000168541	0.000161544	0.00018432	0.000157383	6.02343e-05	6.58028e-05	6.5056e-05	5.75993e-05	6.21805e-05	7.90131e-05	6.65305e-05	6.98848e-05	6.63343e-05	6.78989e-05	5.72088e-05	6.1119e-05	5.72891e-05	5.02176e-05	6.10451e-05	5.64669e-05
Mrakiaceae	0	2.95801e-07	0	0	0	0	0	0	0	8.95833e-08	0	2.68299e-07	8.9796e-08	9.8911e-08	1.65208e-07	3.74144e-07	0	2.74357e-07	6.49112e-07	2.68226e-07	1.02614e-07	9.70359e-07	4.12175e-07	0
Mucoraceae	4.73586e-06	6.24603e-06	6.9511e-06	5.54753e-06	6.79398e-06	7.05794e-06	3.0946e-06	1.00686e-05	8.32278e-06	1.10055e-05	6.39979e-06	8.19996e-06	9.58743e-06	1.8382e-05	7.14534e-06	6.9169e-06	9.58386e-06	1.7577e-05	1.7251e-05	2.0826e-05	1.05876e-05	3.12208e-05	2.38961e-05	1.46225e-05
Muribaculaceae	2.41083e-06	2.60909e-06	2.57911e-06	1.76373e-06	2.64106e-06	2.01067e-06	3.82141e-06	1.65992e-06	1.26667e-06	2.40505e-06	1.50953e-06	3.01015e-06	1.37719e-06	2.25758e-06	2.30682e-06	1.8494e-06	2.66699e-06	3.64089e-06	3.56696e-06	3.03367e-06	2.566e-06	2.10718e-06	3.39722e-06	4.5385e-06
Mycenaceae	3.96707e-07	1.21697e-06	7.38166e-07	5.99552e-07	6.07607e-07	2.55741e-06	6.74282e-07	1.75592e-06	1.04712e-06	2.3914e-06	6.32916e-07	4.06741e-06	9.86884e-07	4.40859e-06	1.44432e-06	2.18835e-06	2.16894e-06	4.1067e-06	4.16344e-06	5.63157e-06	4.60959e-06	8.68995e-06	7.50931e-06	1.85421e-06
Mycobacteriaceae	0.000790814	0.000821466	0.000975247	0.000836214	0.00109398	0.00107202	0.00104024	0.00123308	0.00121625	0.0013275	0.000968369	0.00135918	0.00114996	0.00183963	0.00105712	0.00113363	0.00131938	0.00144467	0.00156736	0.00182883	0.000976836	0.00224382	0.0017978	0.00116103
Mycocaliciaceae	0	0	0	0	0	0	0	0	0	1.7514e-07	0	0	0	0	0	0	0	6.33909e-07	0	0	0	9.38729e-08	0	0
Mycoplasmataceae	1.12429e-05	1.5219e-05	3.3057e-06	5.45783e-06	9.12498e-06	7.69497e-06	8.26494e-06	8.67117e-06	1.18363e-05	1.23262e-05	5.22653e-06	4.70589e-06	1.44101e-05	7.54716e-06	6.10891e-06	7.98758e-06	8.89534e-06	1.22312e-05	1.86802e-06	1.48116e-06	8.03534e-06	8.13132e-06	5.73579e-06	7.31675e-06
Mycosphaerellaceae	2.93253e-06	4.13833e-06	8.51757e-06	1.72178e-06	8.20897e-06	3.22798e-06	6.61345e-06	8.71041e-06	1.26543e-05	1.82018e-05	5.89511e-06	2.03123e-05	1.15328e-05	3.37618e-05	9.83744e-06	1.27504e-05	2.33193e-05	2.54842e-05	2.29081e-05	3.36915e-05	1.25396e-05	5.12764e-05	3.63447e-05	1.48153e-05
Myoviridae	1.92102e-05	2.68393e-05	1.54967e-05	1.13271e-05	2.37582e-05	2.55153e-05	2.39878e-05	8.22255e-05	1.45349e-05	1.25268e-05	1.16868e-05	7.39105e-06	2.19391e-05	1.21309e-05	2.081e-05	2.95608e-05	8.91237e-06	7.03753e-06	7.62378e-06	1.21537e-05	1.23282e-05	8.18538e-06	1.48028e-05	1.61776e-05
Myriangiaceae	0	1.56199e-07	5.34904e-07	0	5.34808e-07	8.38909e-08	2.46711e-07	7.28414e-08	1.79925e-07	2.28501e-07	6.75464e-07	2.16401e-07	0	3.53353e-07	1.42308e-07	0	0	0	0	2.15266e-07	0	4.0878e-07	2.72201e-07	0
Mytilinidiaceae	2.40555e-07	1.02442e-07	0	4.01056e-07	0	6.54734e-07	9.99668e-08	9.36176e-07	2.84904e-07	3.4544e-07	5.87267e-07	0	4.18895e-07	2.64617e-07	4.39258e-07	4.6768e-07	3.79458e-07	2.07038e-07	1.0362e-07	4.44928e-07	1.89906e-07	1.42285e-06	5.66307e-07	6.09385e-07
Myxococcaceae	0.00264722	0.00340011	0.00319214	0.00285991	0.00369497	0.00328983	0.00368208	0.0031633	0.00201532	0.00202444	0.002137	0.00196683	0.00249374	0.00228123	0.0026017	0.00263559	0.00171448	0.00176249	0.00162139	0.00194624	0.00184868	0.0014656	0.00179077	0.00171523
Myxotrichaceae	7.62206e-07	1.39952e-06	8.79449e-07	1.43957e-06	4.01822e-07	1.69392e-06	2.57981e-06	1.71688e-06	7.98049e-07	1.01145e-06	1.01636e-06	1.2325e-06	1.30433e-06	2.57414e-06	9.44113e-07	8.85479e-07	5.56173e-07	1.67115e-06	1.01857e-06	2.05808e-06	3.98174e-07	2.04965e-06	1.43773e-06	7.28524e-07
Naemateliaceae	3.08681e-07	0	1.06518e-07	2.23812e-07	3.3757e-07	5.51283e-08	0	1.07181e-07	1.68216e-07	1.63916e-07	0	4.9827e-08	4.9784e-07	3.54944e-07	3.9243e-07	1.07291e-07	4.2968e-07	0	3.01188e-07	5.57911e-07	2.47441e-07	6.14315e-07	3.81865e-07	1.41185e-07
Nakamurellaceae	5.30511e-05	5.59893e-05	0.000188493	5.60652e-05	7.21688e-05	6.84701e-05	7.1236e-05	7.1201e-05	5.34656e-05	5.08669e-05	5.40168e-05	4.46047e-05	5.01596e-05	5.00962e-05	5.62228e-05	5.58041e-05	4.98008e-05	4.81271e-05	4.66184e-05	4.12126e-05	4.27121e-05	3.65129e-05	4.83677e-05	4.10668e-05
Nannocystaceae	0.000295602	0.000387316	0.000337937	0.000381559	0.000329492	0.000317867	0.000384345	0.00028147	0.000377849	0.000493796	0.0003236	0.000326103	0.000379122	0.000310546	0.000377806	0.000381003	0.000231542	0.000279554	0.000213748	0.000200402	0.00021731	0.000151199	0.000223869	0.000205252
Nanoarchaeaceae	0	0	0	0	9.58508e-08	0	0	0	0	0	0	0	5.34679e-07	0	2.69495e-07	0	2.92183e-07	4.23134e-07	0	0	0	0	0	0
Nanopusillaceae	7.18952e-07	2.87072e-07	4.4307e-07	7.66832e-07	7.8584e-07	9.54696e-07	6.58672e-07	8.22629e-07	4.00973e-07	3.88493e-07	3.88898e-07	5.60629e-07	7.26544e-07	7.82397e-07	5.08263e-07	7.58474e-07	4.10267e-07	1.38439e-07	1.56358e-07	1.63519e-07	1.89723e-07	3.27328e-07	3.62131e-07	4.87337e-08
Natranaerobiaceae	4.37733e-07	1.05174e-07	3.21991e-07	4.7251e-07	2.58433e-07	5.1735e-07	2.77241e-07	1.00036e-07	9.21194e-07	5.41233e-07	1.6748e-07	1.74394e-07	6.19545e-07	4.58836e-07	1.75671e-07	3.21874e-07	0	0	1.68575e-07	0	0	4.72809e-07	8.28423e-07	0
Natrialbaceae	2.20169e-05	2.11222e-05	2.63751e-05	2.47918e-05	2.1435e-05	1.85006e-05	2.32775e-05	2.14347e-05	1.98864e-05	2.615e-05	2.18625e-05	2.6641e-05	2.37046e-05	1.79855e-05	2.62556e-05	2.4881e-05	1.83175e-05	2.63974e-05	1.97478e-05	1.70616e-05	2.56502e-05	2.11707e-05	2.19789e-05	1.86728e-05
Nautiliaceae	2.94613e-07	0	8.57038e-08	1.22055e-06	6.7422e-07	0	3.6947e-07	2.8506e-07	5.20916e-07	0	2.62905e-07	6.40359e-07	4.30711e-07	2.86109e-07	2.21874e-07	1.00474e-06	0	0	0	0	2.884e-07	9.71475e-08	3.0194e-07	0
Nectriaceae	1.96772e-06	6.31768e-06	5.58886e-06	4.87089e-06	5.29902e-06	1.01848e-05	6.13096e-06	9.87168e-06	1.25301e-05	6.5547e-06	1.11109e-05	1.06728e-05	8.82698e-06	1.21722e-05	6.15001e-06	8.79956e-06	6.25698e-06	8.49361e-06	8.7107e-06	1.58654e-05	8.42988e-06	1.51882e-05	1.02704e-05	5.59771e-06
Neisseriaceae	8.79909e-05	8.79848e-05	9.65138e-05	9.14194e-05	8.52797e-05	8.39765e-05	8.96182e-05	8.23124e-05	8.89353e-05	8.15446e-05	8.7866e-05	8.13254e-05	8.58803e-05	6.80156e-05	8.34098e-05	7.3185e-05	7.93524e-05	0.000104719	7.94586e-05	7.97056e-05	8.23749e-05	6.7568e-05	8.61944e-05	9.00678e-05
Neocallimastigaceae	1.25355e-06	1.16294e-06	1.91508e-06	1.35563e-06	4.07996e-06	2.80961e-06	1.66858e-06	3.86775e-06	4.63891e-06	7.41686e-06	2.92122e-06	8.51881e-06	6.30825e-06	1.35735e-05	3.98654e-06	5.07415e-06	4.57372e-06	9.10923e-06	1.2016e-05	1.42792e-05	4.58179e-06	2.86959e-05	1.98259e-05	7.36227e-06
Neolectaceae	0	0	0	0	4.0751e-08	0	0	5.22435e-07	1.41693e-06	6.48029e-07	4.75252e-07	6.98793e-07	6.61943e-07	2.76361e-06	4.93123e-07	6.02088e-07	9.95213e-07	7.94628e-07	9.66462e-07	2.3713e-06	2.32272e-07	4.7295e-06	3.48433e-06	3.10288e-07
Nidulariaceae	7.28348e-08	3.6623e-07	3.10676e-07	2.64792e-07	9.45196e-08	0	3.03795e-07	9.49705e-08	0	5.2205e-07	0	0	1.07007e-06	5.3608e-07	7.09191e-07	1.01331e-07	1.23284e-07	1.0628e-06	4.70606e-07	7.94494e-07	3.3512e-07	8.69754e-07	8.97822e-07	2.66682e-07
Nitriliruptoraceae	4.6023e-05	4.54816e-05	4.86805e-05	5.73365e-05	7.13298e-05	7.41925e-05	7.28792e-05	7.68184e-05	8.949e-05	9.56213e-05	6.63391e-05	8.81104e-05	6.83458e-05	0.000125426	7.44396e-05	7.9354e-05	0.000116595	0.000129061	0.0001334	0.000157004	6.63442e-05	0.000197169	0.000137403	7.77713e-05
Nitrosomonadaceae	0.000555912	0.000511279	0.000668855	0.000566496	0.000539906	0.000550821	0.000542342	0.000514306	0.00054801	0.000524048	0.000587229	0.000571476	0.000594938	0.000499187	0.000556986	0.000559649	0.000668474	0.000638818	0.000585027	0.000611707	0.000791323	0.000640625	0.00062693	0.000902685
Nitrosopumilaceae	0.000112604	0.000103801	0.000100547	0.00010159	0.00011866	0.000143751	0.000136122	0.000122632	0.000114951	0.000114198	0.000155664	0.000145875	0.000105633	0.000103844	8.90951e-05	0.000118292	0.000138104	0.000169237	0.000173162	0.000172382	0.000220616	0.000160177	0.00015343	0.000176737
Nitrososphaeraceae	0.000975181	0.000951779	0.000818121	0.000864441	0.00115102	0.00134974	0.00115234	0.00117915	0.00107253	0.00107244	0.00156836	0.00157007	0.00100247	0.000936653	0.000791862	0.00113739	0.00141137	0.00155867	0.0017906	0.00162706	0.00183564	0.00157647	0.00147378	0.00174971
Nitrospinaceae	1.82918e-05	2.2173e-05	2.30099e-05	1.73311e-05	1.93698e-05	1.84955e-05	2.32649e-05	1.6901e-05	1.88935e-05	1.84878e-05	2.20002e-05	2.0445e-05	1.87316e-05	1.57761e-05	2.18012e-05	1.73499e-05	2.00349e-05	2.12849e-05	2.48921e-05	1.91452e-05	2.16171e-05	1.5044e-05	1.28337e-05	1.66378e-05
Nitrospiraceae	0.00648337	0.0060058	0.0059253	0.00558721	0.00456792	0.00526614	0.0045076	0.00483507	0.00490361	0.00479227	0.00533225	0.0050575	0.00606127	0.00566721	0.00540541	0.0059585	0.00518511	0.00431749	0.00483803	0.00455157	0.00757354	0.00622635	0.00624376	0.00674181
Nocardiaceae	0.000406381	0.000474741	0.000593138	0.000486728	0.00059966	0.00058449	0.000604585	0.000601816	0.00047143	0.000498874	0.000470753	0.000460914	0.00048592	0.00047818	0.00047768	0.000501127	0.000453967	0.000434487	0.000453941	0.00043346	0.000427521	0.000343221	0.00042	0.000428216
Nocardioidaceae	0.00160496	0.00161537	0.00268482	0.00166913	0.0023346	0.00238368	0.00232599	0.00245202	0.00201697	0.00208982	0.00208031	0.00193058	0.00284285	0.00284491	0.00252625	0.00254243	0.00238177	0.00249098	0.00237055	0.00246233	0.00244424	0.00213277	0.00234329	0.0025959
Nocardiopsaceae	0.000108497	0.00014686	0.00012925	0.000136852	0.000194345	0.000196297	0.000204071	0.000202855	0.000166958	0.000142059	0.000141506	0.000136764	0.000138421	0.000134254	0.000135464	0.000143536	0.000115072	0.000130896	0.000107698	8.68678e-05	0.00011108	8.25343e-05	0.000101471	0.000111101
Nosematidae	2.8434e-07	3.32752e-07	9.92338e-07	1.46204e-07	7.63992e-07	9.37931e-07	1.06814e-07	9.2525e-07	8.47241e-07	2.7278e-06	9.72753e-07	1.87165e-06	1.54061e-06	4.44089e-06	2.24103e-06	1.82862e-06	1.72113e-06	3.53927e-06	4.39872e-06	7.26158e-06	1.13892e-06	8.47459e-06	5.15668e-06	2.50757e-06
Nostocaceae	0.000528024	0.000506355	0.000537481	0.000549406	0.000579877	0.000576869	0.000615744	0.00052016	0.000505538	0.000503459	0.000561776	0.000527176	0.000500331	0.000468976	0.000500107	0.000499642	0.000505236	0.000461066	0.000477865	0.000443064	0.000546372	0.000439416	0.000455149	0.000525784
Notoacmeibacteraceae	2.31351e-06	3.73177e-06	2.33032e-06	2.61989e-06	2.33234e-06	2.43034e-06	2.63024e-06	9.81835e-07	3.25668e-06	1.11589e-06	3.16493e-06	2.47066e-06	2.63131e-06	2.24675e-06	1.96703e-06	2.17204e-06	2.12129e-06	2.33581e-06	2.88719e-06	1.86525e-06	1.57893e-06	1.25594e-06	1.70324e-06	1.97954e-06
Oceanospirillaceae	8.96546e-05	8.80168e-05	9.71369e-05	0.000102305	7.2069e-05	7.65444e-05	8.47568e-05	7.86481e-05	9.60668e-05	9.34053e-05	9.36547e-05	9.15898e-05	8.23363e-05	6.99055e-05	8.73673e-05	8.54814e-05	0.000104033	0.000118835	9.67485e-05	9.59429e-05	8.94383e-05	7.91481e-05	8.67459e-05	8.70521e-05
Oculatellaceae	7.92763e-06	7.74106e-06	4.57298e-06	7.95868e-06	6.95104e-06	6.08065e-06	5.75495e-06	6.98968e-06	4.95098e-06	5.17233e-06	6.16939e-06	6.89293e-06	4.74552e-06	7.13193e-06	6.89558e-06	6.16273e-06	6.96531e-06	6.65633e-06	4.6595e-06	3.33668e-06	4.86488e-06	4.73373e-06	5.05694e-06	3.68858e-06
Odoribacteraceae	8.54796e-06	7.21267e-06	9.66068e-06	1.15441e-05	7.34893e-06	9.92177e-06	6.18331e-06	8.35333e-06	9.03404e-06	1.07595e-05	1.10584e-05	1.02729e-05	1.19078e-05	1.01377e-05	1.18116e-05	9.83009e-06	7.20189e-06	8.36935e-06	1.03958e-05	7.97648e-06	1.41615e-05	6.18537e-06	8.39728e-06	7.46437e-06
Oleiphilaceae	8.21592e-06	6.8928e-06	7.32087e-06	7.15584e-06	5.14816e-06	6.16658e-06	1.06975e-05	8.89738e-06	6.26631e-06	8.6098e-06	8.74085e-06	7.39864e-06	6.45956e-06	5.38945e-06	5.61471e-06	9.67893e-06	9.34971e-06	5.39869e-06	7.30336e-06	5.46534e-06	5.32965e-06	4.4582e-06	5.91065e-06	5.41829e-06
Oligoflexaceae	1.4093e-05	1.96937e-05	1.66978e-05	1.88408e-05	1.98209e-05	1.65582e-05	1.87579e-05	1.43699e-05	1.81772e-05	1.35642e-05	1.60344e-05	1.65555e-05	1.84067e-05	1.82493e-05	1.98333e-05	2.25611e-05	1.68449e-05	2.07882e-05	1.48769e-05	1.27753e-05	1.55364e-05	1.27189e-05	1.84001e-05	1.39274e-05
Oligosphaeraceae	6.17391e-07	6.87738e-07	5.16164e-07	4.11099e-07	8.26724e-07	1.10246e-06	5.20745e-07	2.01593e-07	0	1.4992e-07	2.03692e-07	6.64236e-07	4.37756e-07	5.10116e-07	9.19702e-07	7.34513e-07	0	8.69233e-07	0	6.72626e-07	1.1031e-07	0	4.12551e-07	2.37608e-07
Olpidiaceae	8.24545e-08	0	7.03418e-08	0	0	0	0	7.07799e-08	0	2.20578e-07	0	2.63237e-07	0	3.2037e-07	0	0	0	2.12898e-07	1.06552e-07	4.11015e-07	0	6.69518e-07	6.11977e-07	1.96072e-07
Omphalotaceae	2.11802e-06	3.83072e-06	2.30125e-06	3.02526e-06	3.25262e-06	3.60934e-06	2.84354e-06	4.42584e-06	3.48416e-06	5.48306e-06	2.82844e-06	5.13403e-06	4.75902e-06	1.0144e-05	2.70786e-06	5.62015e-06	4.11962e-06	4.8484e-06	7.92277e-06	8.72582e-06	6.38051e-06	1.61118e-05	1.057e-05	3.42068e-06
Onygenaceae	0	0	0	0	0	0	0	0	0	4.00678e-07	0	0	0	0	1.56229e-07	0	0	0	0	3.41114e-07	4.53968e-07	9.08118e-08	3.76331e-07	0
Ophiocordycipitaceae	3.01082e-06	3.9746e-06	2.60931e-06	3.56341e-06	2.95594e-06	3.09209e-06	4.09029e-06	4.36162e-06	2.71307e-06	2.95137e-06	5.57906e-06	2.20921e-06	2.60627e-06	2.79819e-06	1.94252e-06	2.63531e-06	1.70998e-06	1.10871e-06	3.3566e-06	1.71463e-06	1.36659e-06	2.60687e-06	2.5032e-06	2.16619e-06
Ophiostomataceae	3.38329e-07	7.91012e-07	1.11201e-06	2.25659e-07	4.58149e-07	4.68106e-07	1.93873e-06	1.48177e-06	1.06352e-06	2.0118e-06	2.292e-06	9.07872e-07	1.44117e-06	8.69529e-07	1.81938e-07	1.59794e-06	1.18687e-06	2.41747e-06	4.29015e-07	2.63924e-06	1.22591e-06	3.66053e-06	7.12936e-07	4.36731e-07
Opitutaceae	0.00217943	0.00276917	0.00263367	0.00267747	0.00218972	0.00243796	0.00193256	0.00232196	0.00289859	0.00329515	0.00279697	0.00254964	0.00393762	0.00256276	0.00310536	0.00333691	0.00288738	0.00313271	0.00295657	0.0031183	0.00237951	0.00208049	0.00217967	0.00233729
Orbaceae	8.14976e-07	3.12087e-06	2.22191e-06	1.94531e-06	1.07367e-06	1.70406e-06	1.64579e-06	1.976e-06	1.57062e-06	1.28409e-06	1.72148e-06	7.11132e-07	2.51543e-06	1.63288e-06	1.65823e-06	1.95609e-06	1.18483e-05	1.16784e-06	2.5802e-06	1.10518e-06	1.85291e-06	1.89273e-06	1.9851e-06	1.4851e-06
Orbiliaceae	4.16728e-06	3.6582e-06	5.91021e-06	4.1e-06	7.98118e-06	5.23468e-06	5.49335e-06	5.8376e-06	6.47256e-06	5.81946e-06	5.66691e-06	4.68616e-06	6.062e-06	9.21564e-06	3.71744e-06	7.20775e-06	3.18842e-06	4.32966e-06	2.79385e-06	5.58188e-06	3.18498e-06	6.39529e-06	3.19101e-06	3.51229e-06
Ordosporidae	1.49832e-07	9.01489e-08	8.52141e-08	0	3.88881e-08	0	8.91133e-08	3.00107e-07	7.52007e-07	3.33305e-07	2.15331e-07	8.76955e-07	4.00234e-07	1.45493e-06	4.10659e-07	7.08736e-07	1.55831e-06	5.1582e-07	1.67805e-06	2.09097e-06	7.56414e-07	2.7633e-06	1.85848e-06	6.03463e-07
Oscillatoriaceae	0.000242376	0.000240848	0.000244176	0.00025294	0.000247816	0.000248771	0.000256743	0.000215862	0.000232207	0.000252046	0.000252208	0.000236345	0.000231763	0.000204442	0.000233877	0.000238791	0.000224911	0.000208319	0.000217043	0.000231414	0.000250178	0.000219219	0.000208808	0.000238512
Oscillochloridaceae	0.000214007	0.000220481	0.000236542	0.000243724	0.000233241	0.000230174	0.000214216	0.000208798	0.000251934	0.000237129	0.000284011	0.00027241	0.000286859	0.000252043	0.000272156	0.000251305	0.000235105	0.000255123	0.000238221	0.000207154	0.000263893	0.000212321	0.000242698	0.000268085
Oscillospiraceae	9.64543e-07	2.78978e-06	2.1014e-06	1.6168e-06	2.03748e-06	1.16601e-06	1.15409e-06	2.58802e-06	1.66632e-06	1.8051e-06	1.65422e-06	1.10202e-06	2.14984e-06	1.68763e-06	2.53132e-06	2.18241e-06	6.12281e-07	2.91544e-07	1.52301e-06	6.94027e-07	1.50988e-06	8.53744e-07	9.30929e-07	1.30899e-06
Oxalobacteraceae	0.00231026	0.00227905	0.00251805	0.00258215	0.00239062	0.00234736	0.00252328	0.00238505	0.00237249	0.00201921	0.0022144	0.00204222	0.00211585	0.00185009	0.00222997	0.0019992	0.00214562	0.00218653	0.00213741	0.00201705	0.00210558	0.00188305	0.00214038	0.0023434
Paenibacillaceae	0.000535519	0.000608121	0.000585411	0.000629588	0.000597116	0.000589559	0.000918878	0.000569188	0.000541269	0.000570172	0.000576539	0.000557234	0.000606907	0.000546937	0.000603488	0.00060096	0.000505114	0.000508925	0.000500793	0.000479368	0.000539324	0.000446928	0.000480346	0.000540785
Paludibacteraceae	1.44936e-05	1.1356e-05	1.63734e-05	1.73002e-05	1.52435e-05	1.64516e-05	1.13959e-05	1.14251e-05	1.53937e-05	1.8074e-05	1.50578e-05	1.6223e-05	1.71428e-05	1.52925e-05	1.62813e-05	1.63338e-05	1.4291e-05	1.03864e-05	1.29913e-05	1.04159e-05	1.57055e-05	1.41838e-05	1.19117e-05	1.36929e-05
Parachlamydiaceae	2.56789e-05	3.07738e-05	3.03829e-05	3.31351e-05	3.14815e-05	2.96776e-05	2.90524e-05	3.16246e-05	3.07417e-05	3.72397e-05	4.04171e-05	3.65858e-05	7.69432e-05	9.78603e-05	5.31214e-05	8.46349e-05	3.12098e-05	1.92949e-05	2.60694e-05	2.89884e-05	3.48437e-05	2.83262e-05	2.74604e-05	3.04875e-05
Parmeliaceae	0	1.77259e-07	0	3.57023e-07	0	0	4.58671e-07	3.60326e-07	2.59521e-07	0	1.42665e-07	6.98555e-07	0	1.12178e-06	8.5554e-08	8.19754e-08	1.97789e-07	6.85324e-07	4.34183e-07	3.73832e-07	9.91553e-08	2.50756e-06	6.66031e-07	2.02117e-07
Parvularculaceae	7.61237e-05	5.68969e-05	8.09358e-05	9.15079e-05	6.89043e-05	6.94952e-05	0.000126638	8.53617e-05	7.08796e-05	7.27412e-05	8.08656e-05	7.59014e-05	6.95638e-05	6.53867e-05	7.51036e-05	7.84337e-05	0.000101426	9.21578e-05	0.000105366	7.57841e-05	7.5985e-05	5.66134e-05	6.824e-05	8.0608e-05
Pasteurellaceae	1.41799e-05	1.79326e-05	2.07718e-05	1.48956e-05	1.84749e-05	1.24226e-05	1.02507e-05	1.19401e-05	2.24853e-05	1.86194e-05	1.6532e-05	1.1352e-05	1.49156e-05	1.28384e-05	1.49106e-05	9.23038e-06	1.33849e-05	2.34593e-05	1.22914e-05	1.52766e-05	1.36086e-05	1.55134e-05	1.12829e-05	1.37749e-05
Patellariaceae	0	4.66111e-07	4.31352e-07	6.8456e-07	1.12486e-07	0	1.50857e-07	7.22683e-07	2.99194e-07	6.86703e-07	8.40159e-07	5.7651e-08	8.75511e-08	6.46261e-07	6.49082e-07	6.0296e-08	0	1.38314e-06	2.71642e-06	5.26438e-07	2.09383e-06	4.68487e-07	1.07549e-06	7.06465e-07
Patulibacteraceae	3.43548e-05	4.72524e-05	4.28786e-05	4.00095e-05	5.21396e-05	5.26918e-05	4.72279e-05	5.37653e-05	5.93756e-05	5.28966e-05	6.0195e-05	5.79224e-05	6.27159e-05	5.86478e-05	7.17681e-05	6.2407e-05	7.14056e-05	5.19361e-05	6.01115e-05	6.63945e-05	5.8108e-05	6.84571e-05	6.69079e-05	6.04149e-05
Paxillaceae	0	1.33627e-06	7.05377e-07	6.18609e-07	1.15019e-06	1.39371e-06	6.40137e-07	5.66442e-07	6.41985e-07	1.44065e-06	6.16888e-07	1.86621e-06	1.71546e-06	3.09612e-06	1.45461e-06	1.07852e-06	4.65788e-07	1.93473e-06	2.81624e-06	2.40135e-06	2.28613e-06	4.97006e-06	2.19535e-06	2.12023e-06
Pectobacteriaceae	2.0945e-05	2.65725e-05	2.99036e-05	2.29016e-05	3.30283e-05	2.99465e-05	3.26358e-05	5.86875e-05	5.97382e-05	8.86149e-05	3.52564e-05	9.85767e-05	6.42083e-05	0.000170543	5.52225e-05	6.31322e-05	8.61895e-05	0.000105807	0.000130136	0.000193824	6.49717e-05	0.000279303	0.000195756	8.1687e-05
Pelagibacteraceae	9.2311e-06	9.08774e-06	1.18301e-05	1.0271e-05	9.81987e-06	1.16328e-05	1.13459e-05	8.40687e-06	7.83013e-06	7.50286e-06	8.18594e-06	1.0507e-05	1.2532e-05	1.293e-05	9.01873e-06	8.33925e-06	1.09663e-05	1.26538e-05	9.98701e-06	9.85041e-06	1.06985e-05	1.01921e-05	9.2658e-06	1.25596e-05
Peltigeraceae	7.16408e-08	6.4656e-08	0	6.51127e-08	3.29625e-07	0	1.64734e-07	5.68434e-07	6.08382e-07	1.27766e-07	1.95756e-07	1.3972e-07	9.09622e-08	5.96118e-07	0	1.02758e-07	1.37175e-07	0	1.46682e-07	1.46255e-06	1.14608e-07	1.55292e-07	0	0
Peniophoraceae	3.22311e-07	9.98485e-08	5.70162e-07	2.26964e-07	0	3.86588e-07	9.38524e-07	1.20778e-06	8.6445e-07	8.45419e-07	1.16584e-06	9.15578e-07	1.02649e-06	1.77131e-06	5.39877e-07	6.6143e-07	1.14354e-06	1.7193e-06	1.56957e-06	1.20201e-06	9.51142e-07	1.83287e-06	1.6234e-06	0
Peptococcaceae	0.000145675	0.000165658	0.000147296	0.000167641	0.000162517	0.0001621	0.000155545	0.000155626	0.000141005	0.00015033	0.000169152	0.000143462	0.000171789	0.00014868	0.000168546	0.00015079	0.000152628	0.000140832	0.000152774	0.000127518	0.000149048	0.000131835	0.000129187	0.000144313
Peptoniphilaceae	1.69718e-06	3.6625e-06	3.02113e-06	3.52524e-06	9.90734e-07	2.1065e-06	6.73893e-07	7.19847e-07	1.83672e-06	2.15564e-06	2.70529e-06	1.10461e-06	2.9114e-06	2.34594e-06	3.26612e-06	2.57621e-06	5.48814e-07	3.81747e-06	1.91024e-06	2.64489e-06	2.2161e-06	2.12702e-06	3.27987e-06	1.8977e-06
Peptostreptococcaceae	1.13139e-05	9.05319e-06	9.61718e-06	1.31497e-05	1.3806e-05	1.30828e-05	1.06252e-05	9.79116e-06	1.25087e-05	1.11555e-05	1.15147e-05	1.37682e-05	1.32482e-05	9.56656e-06	1.0797e-05	1.20325e-05	1.42039e-05	1.461e-05	9.73844e-06	1.11735e-05	1.41875e-05	1.12145e-05	1.12649e-05	1.17023e-05
Periconiaceae	0	3.33297e-07	3.77531e-07	5.59419e-07	1.91702e-07	0	1.77214e-07	0	4.2187e-07	0	8.56432e-08	2.37811e-07	0	8.4501e-07	1.96891e-07	3.9977e-07	0	0	1.28347e-07	0	0	3.07551e-07	1.96719e-07	0
Persicobacteraceae	0	0	0	8.92557e-08	7.68178e-07	2.60156e-07	0	8.42996e-08	6.87422e-08	5.81748e-07	7.495e-07	4.18716e-07	0	7.41845e-07	8.16652e-08	7.43368e-07	1.26486e-07	0	0	1.17537e-07	0	0	0	9.60055e-08
Petrotogaceae	1.30004e-06	2.86164e-06	1.35517e-06	1.30677e-06	2.10782e-06	1.59103e-06	2.41268e-06	2.3732e-06	1.49648e-06	1.77353e-06	4.07869e-06	7.86458e-07	1.33096e-06	1.59332e-06	1.74448e-06	1.15776e-06	2.69243e-06	2.64958e-06	1.98499e-06	2.7283e-06	3.69961e-06	5.2389e-07	1.28683e-06	1.81077e-06
Pezizaceae	0	0	0	0	3.31971e-07	0	9.44111e-07	5.6639e-07	2.29825e-07	7.61022e-07	1.12487e-07	4.71313e-07	0	7.84771e-07	3.12646e-07	3.14475e-07	2.47885e-07	6.95383e-07	1.34459e-07	0	3.15172e-07	1.98921e-07	9.11118e-08	8.13612e-07
Phaeomoniellaceae	1.05702e-07	6.6286e-08	6.26206e-07	4.5696e-07	4.47097e-07	1.21543e-07	8.81238e-08	1.02124e-07	4.58422e-07	2.43555e-07	3.94386e-07	4.03287e-08	1.71608e-07	2.10984e-07	5.98312e-07	6.82373e-07	8.18438e-08	2.66541e-07	5.88258e-08	8.26205e-07	0	7.92004e-07	3.9911e-07	5.00029e-08
Phaeosphaeriaceae	1.6808e-07	1.51693e-07	0	1.69838e-07	0	5.98832e-07	2.42575e-06	9.74373e-08	9.0578e-08	3.95344e-07	0	2.63257e-07	8.24011e-08	4.67636e-07	1.53649e-07	3.68042e-07	0	9.29235e-07	2.65754e-07	1.23069e-07	2.07643e-07	8.08175e-07	4.07323e-07	0
Phaeotrichaceae	0	3.33297e-07	0	0	2.79674e-07	2.17407e-07	0	1.05671e-07	0	3.87848e-07	9.78779e-08	0	0	0	0	9.47508e-08	0	0	0	0	0	3.52633e-07	0	0
Phaffomycetaceae	1.58809e-06	6.94416e-07	8.41216e-07	1.09621e-06	1.22527e-06	1.82882e-06	7.75965e-07	1.53973e-06	1.625e-06	1.28094e-06	6.33885e-07	9.50008e-07	1.38848e-06	2.91358e-06	1.08745e-06	1.67927e-06	1.12309e-06	1.23765e-06	9.96211e-07	3.0075e-06	8.36921e-07	5.43485e-06	2.1228e-06	5.71328e-07
Phanerochaetaceae	8.93716e-07	5.35866e-07	4.26936e-07	4.48341e-07	5.64246e-07	0	1.32841e-06	2.76943e-07	8.68924e-07	6.19003e-07	2.73743e-06	1.12223e-06	9.39916e-07	9.93851e-07	7.04351e-07	8.27757e-07	2.3328e-06	2.20417e-06	9.70978e-07	4.06027e-07	1.60718e-06	2.66144e-06	1.86249e-06	1.11514e-06
Phaselicystidaceae	1.98734e-06	2.22774e-06	2.23396e-06	2.45167e-06	1.49101e-06	2.02838e-06	2.26931e-06	1.75648e-06	2.00426e-06	2.01047e-06	1.50794e-06	8.05315e-07	1.71919e-06	1.5604e-06	1.34128e-06	1.60414e-06	2.04925e-06	1.31363e-06	1.81989e-06	2.20234e-06	2.098e-06	1.52733e-06	3.83835e-07	9.01775e-07
Phlyctidaceae	0	0	0	0	0	0	0	0	0	0	0	0	0	0	0	0	0	4.51343e-07	1.50594e-07	0	0	0	0	0
Phycisphaeraceae	0.000197017	0.000241702	0.000259351	0.000269438	0.000257667	0.000247826	0.000225944	0.000220563	0.000186264	0.000208282	0.000192713	0.000203587	0.000224293	0.00020187	0.000219739	0.000236421	0.000153121	0.000139601	0.000143983	0.000128128	0.000171915	0.00013195	0.000151867	0.000152928
Phycodnaviridae	2.51415e-07	9.93492e-07	1.0076e-07	1.11665e-06	8.61444e-08	8.42157e-07	0	8.16648e-07	1.63811e-07	1.16837e-06	7.67228e-07	1.08107e-06	6.97825e-07	1.39553e-06	2.68065e-07	2.4736e-07	1.03442e-06	8.79956e-07	1.09007e-06	1.11633e-06	6.38513e-07	1.4038e-06	7.1493e-07	1.85543e-06
Phycomycetaceae	5.9929e-07	2.99545e-07	6.60512e-07	0	2.97682e-07	3.72148e-07	3.20442e-07	1.3199e-06	1.19672e-06	3.45638e-06	1.06113e-06	2.50045e-06	1.94612e-06	5.32573e-06	2.00389e-06	1.09007e-06	2.50644e-06	3.42825e-06	3.50488e-06	6.75203e-06	1.11268e-06	1.09836e-05	5.70075e-06	2.57826e-06
Phyllobacteriaceae	0.0029452	0.0047389	0.00315507	0.00293203	0.00277217	0.00265378	0.0027212	0.00468064	0.00327482	0.00284647	0.00313574	0.00276929	0.00286791	0.00284923	0.0024175	0.00288931	0.0029574	0.00309956	0.00266483	0.00277873	0.00222982	0.00210076	0.00260878	0.00288122
Physalacriaceae	7.60571e-06	7.49914e-06	4.60374e-06	3.081e-06	6.87704e-06	5.97984e-06	5.95802e-06	8.15064e-06	4.9753e-06	6.57339e-06	4.04495e-06	3.73418e-06	5.22155e-06	8.863e-06	5.14201e-06	6.90041e-06	3.65574e-06	6.61917e-06	1.51347e-06	4.42436e-06	3.81456e-06	9.39763e-06	5.72388e-06	3.5416e-06
Pichiaceae	1.20303e-06	3.18007e-06	2.55242e-06	8.91541e-07	1.56175e-06	1.05614e-06	1.05188e-06	2.29404e-06	2.56507e-06	4.1358e-06	2.23837e-06	2.90043e-06	1.81069e-06	7.60244e-06	1.93449e-06	1.84367e-06	1.28271e-06	3.77021e-06	3.88852e-06	4.00391e-06	1.17354e-06	1.12454e-05	3.90961e-06	1.56679e-06
Picrophilaceae	2.53339e-07	0	0	1.15127e-07	1.47944e-07	0	1.60129e-07	5.43672e-08	0	0	0	1.01098e-07	0	1.96865e-07	0	0	0	0	0	0	0	0	0	0
Piedraiaceae	0	4.28478e-07	5.02337e-08	0	3.14877e-07	8.82052e-08	1.78227e-07	1.7149e-07	0	0	2.97497e-07	0	8.00468e-08	0	0	0	0	0	0	0	8.82482e-07	0	9.89213e-08	0
Piptocephalidaceae	2.78872e-07	1.79119e-06	6.90477e-07	1.58545e-06	1.25633e-06	2.57222e-07	2.82818e-07	1.9037e-06	1.20789e-06	2.82385e-06	8.86468e-07	4.27097e-06	2.47697e-06	4.20953e-06	1.2206e-06	2.38314e-06	3.16954e-06	2.37873e-06	6.4425e-06	5.52375e-06	2.05948e-06	1.12301e-05	6.10516e-06	1.15219e-06
Pirellulaceae	0.00072426	0.00103926	0.000902755	0.00102569	0.000860683	0.000825789	0.000759667	0.000756569	0.000572687	0.000645257	0.00061691	0.000600637	0.000691036	0.000582999	0.000686029	0.000674959	0.000501209	0.000500506	0.000792109	0.000440256	0.000495016	0.000382417	0.000445459	0.000484174
Piscirickettsiaceae	3.58227e-05	3.91878e-05	4.01664e-05	4.10804e-05	3.2341e-05	3.24614e-05	3.24227e-05	3.93292e-05	4.0281e-05	4.19255e-05	4.22217e-05	3.791e-05	4.46294e-05	4.17045e-05	4.56415e-05	4.46499e-05	4.27501e-05	3.89416e-05	4.66019e-05	3.71601e-05	5.09432e-05	3.27027e-05	3.82292e-05	3.90182e-05
Pisolithaceae	2.25361e-07	2.16761e-07	1.52168e-07	3.45381e-07	8.37404e-07	0	1.04597e-06	3.81708e-07	5.92623e-07	7.96834e-07	7.2746e-07	1.67154e-06	7.37778e-07	1.65863e-06	6.99456e-07	1.07716e-06	1.37909e-06	1.23914e-06	8.27828e-07	7.41249e-07	1.19171e-06	6.96662e-06	1.1939e-06	1.04807e-06
Pithoviridae	1.9859e-07	1.57364e-06	5.04557e-07	9.69742e-07	4.64496e-07	2.87892e-07	9.84875e-07	6.58532e-07	9.90347e-07	1.21404e-06	1.34739e-06	1.21158e-06	6.58325e-07	1.05055e-06	1.25169e-06	1.05223e-06	8.20537e-07	1.23112e-06	1.48612e-07	1.20303e-06	8.44788e-07	8.66612e-07	1.58528e-07	6.47228e-07
Planctomycetaceae	0.00145086	0.00165481	0.00171581	0.00184242	0.00152813	0.00152875	0.00149788	0.00143734	0.00154314	0.00174337	0.00167549	0.0016522	0.00174819	0.00145809	0.00168619	0.00179798	0.0013569	0.00129454	0.00165766	0.00117571	0.00130869	0.00105665	0.00114057	0.00129351
Planococcaceae	2.70257e-05	2.63166e-05	2.81718e-05	2.03384e-05	3.37885e-05	2.49506e-05	2.5924e-05	4.14092e-05	5.43281e-05	6.6236e-05	3.66013e-05	7.55805e-05	5.71673e-05	0.000127377	4.98989e-05	5.08791e-05	7.22024e-05	9.18591e-05	0.000111023	0.000132303	5.34723e-05	0.000210212	0.000147479	7.22433e-05
Plectosphaerellaceae	2.28665e-06	2.32858e-06	2.35417e-06	1.94932e-06	1.76916e-06	2.38304e-06	3.76973e-06	2.46153e-06	2.13233e-06	2.96817e-06	4.45743e-06	1.8171e-06	2.45033e-06	2.50377e-06	1.69049e-06	2.75462e-06	7.31745e-07	5.74124e-07	7.4199e-07	5.04451e-07	1.18623e-06	1.2961e-06	1.59755e-06	8.41075e-07
Pleistophoridae	5.71787e-07	7.37199e-08	9.68342e-08	3.05529e-07	3.24245e-07	7.56663e-08	1.45746e-07	0	0	8.11849e-08	0	2.90657e-07	8.3382e-08	6.06846e-07	0	2.04555e-07	1.15945e-07	0	1.17652e-07	3.63223e-07	1.05057e-07	1.69823e-06	1.00039e-06	0
Pleomassariaceae	0	3.07326e-07	0	0	0	0	0	0	0	0	0	0	0	0	0	0	2.78269e-07	4.83582e-07	0	0	0	0	0	0
Pleosporaceae	1.5088e-06	1.07346e-06	1.01978e-06	5.55813e-07	9.77174e-07	1.00284e-06	3.66335e-05	2.19837e-06	7.33516e-07	2.10098e-06	1.69125e-06	4.54099e-07	1.38922e-06	4.00661e-06	3.56826e-06	3.00538e-06	3.52589e-06	1.01191e-06	9.71283e-07	2.11351e-06	1.75124e-06	6.46753e-06	3.99895e-06	1.95964e-06
Pleuroascaceae	0	0	2.90503e-07	4.60508e-07	0	0	4.52024e-07	4.63122e-07	4.16169e-07	2.02435e-07	0	0	0	4.51255e-07	0	5.68505e-07	0	4.33984e-07	1.46682e-07	5.4342e-07	0	0	0	4.9873e-07
Pleurotaceae	1.61855e-06	1.91477e-06	1.00873e-06	1.05637e-06	1.36962e-06	1.1434e-06	1.22943e-06	1.38938e-06	1.09078e-06	3.06733e-06	1.31863e-06	2.67878e-06	1.57324e-06	2.66057e-06	1.86666e-06	1.37334e-06	3.11611e-07	1.75088e-06	9.87495e-07	3.06068e-06	5.03884e-06	7.24138e-06	2.8873e-06	1.36248e-06
Pluteaceae	0	9.72562e-07	2.85822e-07	6.48002e-07	6.48134e-08	0	0	1.35183e-07	0	3.32224e-07	0	0	0	4.35307e-07	5.0623e-07	0	6.2579e-07	3.22388e-07	2.0932e-07	4.91908e-07	6.72893e-06	2.34404e-07	3.20826e-07	2.64417e-07
Pneumocystidaceae	1.3045e-07	1.83443e-07	3.0228e-07	8.82639e-08	2.95887e-07	2.38856e-07	1.50648e-07	5.92616e-07	2.6446e-07	1.02363e-06	3.81105e-07	1.53248e-06	6.0408e-07	2.73035e-06	1.13933e-06	1.07291e-07	6.86156e-07	7.23236e-07	2.25395e-06	2.17588e-06	7.15259e-07	4.51872e-06	1.65277e-06	8.4803e-07
Podoviridae	0.000114001	8.35929e-05	0.000114423	3.88693e-05	0.00015558	0.000154883	0.000107223	0.000136633	5.32852e-05	5.47582e-05	4.03113e-05	3.73198e-05	4.2265e-05	3.03358e-05	3.21587e-05	3.6491e-05	1.94857e-05	2.4897e-05	1.54679e-05	4.66926e-05	7.2134e-05	8.75889e-05	5.8897e-05	0.000169383
Polyangiaceae	0.00352086	0.00547427	0.00412505	0.00486991	0.00449992	0.00465247	0.00539973	0.00424019	0.00347088	0.00359504	0.0034686	0.00341328	0.00428714	0.00376158	0.00448617	0.00450377	0.00292175	0.00376772	0.00262781	0.00278012	0.00252801	0.00170407	0.00301555	0.00243605
Polydnaviridae	0	2.09404e-07	8.90606e-07	2.57004e-07	5.65807e-07	0	0	1.89941e-07	5.11896e-07	1.03777e-06	0	2.85892e-07	3.83159e-07	3.69259e-07	9.09688e-08	8.4835e-08	1.52178e-07	6.13467e-07	0	1.41253e-06	3.23005e-06	5.81206e-07	9.13312e-07	0
Polyporaceae	4.04011e-06	4.18801e-06	7.14638e-06	6.05352e-06	1.35587e-05	5.61475e-06	2.31101e-06	7.52087e-06	1.15455e-05	1.58624e-05	6.62309e-06	1.61687e-05	8.63344e-06	3.1328e-05	7.92544e-06	8.02594e-06	1.78459e-05	3.81621e-05	1.76427e-05	3.23073e-05	1.14874e-05	5.99876e-05	3.07963e-05	1.13248e-05
Pontiellaceae	2.09593e-05	2.16996e-05	1.90348e-05	1.98461e-05	2.12181e-05	1.76242e-05	1.68294e-05	1.8537e-05	1.62796e-05	1.6414e-05	1.43694e-05	1.8531e-05	1.71028e-05	1.50927e-05	1.65287e-05	2.07014e-05	1.19403e-05	1.398e-05	1.16117e-05	1.10542e-05	1.0171e-05	1.01866e-05	9.13924e-06	1.24375e-05
Porphyromonadaceae	1.70339e-05	2.8266e-05	2.50866e-05	2.36451e-05	2.23592e-05	2.7194e-05	2.18094e-05	1.6932e-05	1.54481e-05	2.27011e-05	1.90375e-05	1.9205e-05	2.04179e-05	2.31063e-05	2.49218e-05	2.61055e-05	2.19375e-05	1.70464e-05	1.59403e-05	1.79294e-05	2.03414e-05	1.91905e-05	1.60056e-05	1.86018e-05
Porticoccaceae	2.48101e-05	2.81441e-05	3.06046e-05	3.27148e-05	2.72013e-05	2.83568e-05	3.19093e-05	2.47201e-05	3.53847e-05	3.14623e-05	3.59132e-05	3.55807e-05	3.01203e-05	2.50704e-05	2.65347e-05	2.69588e-05	2.85313e-05	3.50924e-05	2.96258e-05	2.57137e-05	2.59299e-05	2.00378e-05	2.37574e-05	2.2983e-05
Powellomycetaceae	1.01816e-06	4.44875e-07	1.54137e-06	1.73775e-06	1.71922e-06	4.98792e-07	1.08215e-06	6.87266e-06	1.77875e-06	5.49296e-06	9.97572e-07	6.01703e-06	2.90359e-06	6.52452e-06	1.89222e-06	2.60464e-06	2.58718e-06	3.53853e-06	4.95036e-06	8.32307e-06	1.75406e-06	1.37159e-05	1.01997e-05	3.63981e-06
Poxviridae	0	3.52929e-06	0	0	0	0	0	0	0	0	0	0	0	0	0	0	0	3.22388e-07	0	5.97762e-07	0	1.19353e-07	0	0
Prevotellaceae	2.165e-05	2.77211e-05	2.16302e-05	2.36314e-05	2.1516e-05	2.36219e-05	1.63144e-05	2.03719e-05	2.01522e-05	2.06524e-05	1.89692e-05	1.91938e-05	1.74897e-05	2.02346e-05	2.18362e-05	2.3382e-05	2.03549e-05	2.33726e-05	2.14843e-05	2.49357e-05	2.46501e-05	1.67396e-05	1.89165e-05	1.94317e-05
Prochloraceae	2.22946e-06	3.72862e-06	1.40589e-06	8.85773e-07	2.3998e-06	1.60529e-06	1.9732e-06	1.15266e-06	1.36557e-06	1.65023e-06	1.45246e-06	1.93339e-06	8.23382e-07	8.56793e-07	1.21102e-06	1.44878e-06	3.48317e-06	1.40358e-06	1.24865e-06	3.39731e-06	2.08646e-06	2.33316e-06	2.60629e-06	2.29255e-06
Prochlorotrichaceae	3.16687e-05	3.6372e-05	3.56935e-05	3.87797e-05	3.99725e-05	3.7113e-05	3.65555e-05	3.80208e-05	3.40785e-05	3.40425e-05	3.35479e-05	3.7448e-05	3.92984e-05	3.31095e-05	3.80772e-05	3.05724e-05	3.36037e-05	3.41988e-05	3.29214e-05	3.7129e-05	3.36032e-05	3.04614e-05	3.34019e-05	3.9441e-05
Prolixibacteraceae	0.00014417	0.000184907	0.00022116	0.000108256	0.000135041	0.000121108	0.000115967	0.000110306	0.000169244	0.000188585	0.000135217	0.000138726	0.000135621	0.00012141	0.000136334	0.000131908	0.000138925	0.000201897	0.000145233	0.000132649	0.000135809	0.000115747	0.00010969	0.000115564
Promicromonosporaceae	3.7047e-05	4.23717e-05	4.63901e-05	4.58262e-05	5.2447e-05	6.89714e-05	5.85303e-05	6.55424e-05	5.86836e-05	5.62321e-05	5.8814e-05	5.37519e-05	5.5774e-05	5.58682e-05	5.61245e-05	5.91569e-05	5.21241e-05	5.88732e-05	5.84919e-05	4.96436e-05	4.52897e-05	4.47677e-05	5.08176e-05	5.25519e-05
Propionibacteriaceae	0.000121513	0.000132173	0.000160975	0.000147601	0.000177178	0.000185296	0.00018309	0.000182721	0.000153226	0.000159177	0.000150066	0.000138743	0.000152503	0.000144282	0.000155903	0.00015069	0.000146767	0.000141322	0.000141302	0.000138739	0.000138467	0.000121571	0.000131942	0.000129611
Proteinivoraceae	5.50778e-07	1.02755e-06	4.75379e-07	9.45887e-07	6.77433e-07	5.64005e-07	1.01045e-06	7.08234e-07	2.43748e-07	6.56702e-07	1.26666e-07	3.9356e-07	8.70776e-07	3.94782e-06	1.49849e-07	1.22806e-06	1.07933e-06	1.42227e-06	7.18896e-07	2.90579e-07	1.1123e-06	2.15509e-07	3.21208e-07	2.901e-07
Protomycetaceae	0	0	0	2.80368e-07	3.37196e-07	0	2.86418e-07	5.42436e-07	1.50833e-07	3.16625e-07	0	3.53744e-07	2.62653e-07	7.20987e-07	6.59315e-08	4.56411e-07	3.60101e-07	1.21329e-07	3.74503e-07	1.53018e-06	3.85562e-07	3.11125e-06	1.61678e-06	2.88016e-07
Psathyrellaceae	1.40177e-06	4.16621e-06	3.00829e-06	1.52284e-06	2.53873e-06	2.21174e-06	1.14536e-06	3.57353e-06	3.95321e-06	4.82429e-06	3.61725e-06	6.68339e-06	7.28186e-06	1.1583e-05	4.41029e-06	4.7928e-06	7.66027e-06	8.80527e-06	1.35151e-05	1.40268e-05	5.5247e-06	1.89391e-05	1.33909e-05	7.2038e-06
Pseudanabaenaceae	6.74758e-05	6.53386e-05	6.61484e-05	6.57392e-05	6.39776e-05	6.73756e-05	6.60251e-05	6.30707e-05	6.26016e-05	6.20218e-05	6.8714e-05	6.18443e-05	6.79519e-05	6.27525e-05	7.20229e-05	6.22972e-05	6.36467e-05	6.49577e-05	6.28885e-05	5.45788e-05	7.7377e-05	5.9567e-05	6.09067e-05	5.99848e-05
Pseudeurotiaceae	1.40422e-06	1.48808e-06	2.82696e-06	3.37995e-06	2.34773e-06	1.33001e-06	1.37537e-06	1.63275e-06	9.69106e-07	1.62098e-06	2.11134e-06	1.56157e-06	2.85152e-06	2.73541e-06	6.32348e-07	1.38172e-06	2.01431e-06	2.9885e-06	2.14345e-06	1.82033e-06	1.64842e-06	2.36469e-06	2.40785e-06	2.72466e-06
Pseudoalteromonadaceae	3.82491e-05	4.50859e-05	4.5198e-05	4.37811e-05	4.09703e-05	5.06909e-05	4.95403e-05	4.41852e-05	4.20087e-05	4.61405e-05	5.13999e-05	4.13177e-05	4.47077e-05	3.48975e-05	4.12164e-05	4.45501e-05	4.71646e-05	4.61021e-05	5.20111e-05	5.19198e-05	5.21449e-05	4.35922e-05	4.08956e-05	4.17985e-05
Pseudobacteriovoracaceae	5.40467e-06	9.45301e-06	5.05135e-06	9.39326e-06	6.41138e-06	6.56606e-06	6.41393e-06	7.29457e-06	5.1807e-06	4.44258e-06	7.16124e-06	7.39012e-06	7.78819e-06	6.9761e-06	7.61338e-06	5.18449e-06	3.2038e-06	5.54191e-06	4.08523e-06	3.51946e-06	4.91635e-06	3.21224e-06	5.46064e-06	3.61846e-06
Pseudomassariaceae	0	0	0	0	0	0	0	0	1.58745e-07	3.43842e-07	1.55394e-07	5.03406e-07	0	0	0	3.79003e-07	0	4.51343e-07	0	1.35855e-07	0	0	0	0
Pseudomonadaceae	0.000983048	0.00103269	0.00138655	0.00109305	0.00102692	0.000989879	0.00579703	0.00117429	0.00124261	0.00104938	0.00106471	0.00103383	0.00106534	0.00101391	0.000986257	0.000998598	0.00118173	0.00131749	0.00131618	0.0012782	0.00105908	0.0010461	0.00107447	0.00111125
Pseudonocardiaceae	0.0016852	0.00196996	0.00288791	0.0044972	0.00241184	0.00276577	0.00254167	0.00246511	0.0021501	0.00221458	0.00207059	0.00215819	0.00271395	0.00199469	0.00191589	0.00504198	0.00176884	0.00252683	0.00173959	0.00205551	0.00157612	0.00141766	0.00191124	0.00167614
Pseudoperisporiaceae	0	0	0	0	0	1.35403e-07	4.18223e-06	0	0	0	0	0	3.00175e-07	0	0	0	0	0	0	0	7.74107e-08	0	0	0
Psychromonadaceae	7.17548e-06	4.12259e-06	8.17012e-06	8.20944e-06	3.65463e-06	7.11617e-06	4.60646e-06	5.71222e-06	8.40886e-06	6.20676e-06	1.03535e-05	6.74487e-06	7.71799e-06	6.17019e-06	7.15497e-06	9.2191e-06	9.92367e-06	5.68288e-06	3.72202e-06	6.45101e-06	8.70164e-06	6.17192e-06	5.02038e-06	8.10331e-06
Pterulaceae	0	3.42958e-07	0	0	0	0	0	3.50718e-07	3.12127e-07	5.01384e-07	0	2.86676e-07	5.01138e-07	2.16761e-07	2.87461e-07	0	1.23284e-07	2.8566e-07	1.42969e-07	7.56616e-07	3.7288e-07	1.08631e-06	9.2081e-08	1.21526e-07
Pucciniaceae	7.95037e-06	3.77032e-06	1.60932e-05	2.03389e-06	1.47661e-05	7.07253e-06	2.84906e-06	3.19904e-05	3.80478e-05	6.68927e-05	1.96504e-05	8.01774e-05	3.9901e-05	0.000142574	2.93487e-05	4.2293e-05	5.91591e-05	8.48707e-05	0.000109362	0.000152438	3.86819e-05	0.000236308	0.000158779	6.04676e-05
Punctulariaceae	1.07903e-07	0	2.76157e-07	4.29782e-07	8.57561e-07	8.97437e-08	0	2.84911e-07	0	2.1717e-07	9.30444e-08	5.68215e-07	0	2.77372e-07	0	0	3.28295e-07	4.31649e-06	2.40309e-07	7.29944e-07	2.80955e-07	2.02744e-06	3.77575e-07	2.72356e-07
Puniceicoccaceae	5.71196e-05	6.78535e-05	6.38492e-05	7.47439e-05	5.90445e-05	6.79986e-05	6.53337e-05	6.23883e-05	6.37078e-05	6.25547e-05	5.86594e-05	5.4028e-05	6.95406e-05	5.4415e-05	5.86012e-05	6.93353e-05	6.15031e-05	7.02073e-05	5.86466e-05	5.97054e-05	4.29551e-05	3.91825e-05	4.82669e-05	4.72819e-05
Pyriculariaceae	1.72594e-06	2.31057e-06	1.06483e-06	2.26294e-06	8.9987e-07	1.57034e-06	1.61419e-06	1.74186e-06	1.19797e-06	9.90538e-07	7.20137e-07	8.82073e-07	1.79678e-06	1.96971e-06	1.86796e-06	1.48442e-06	5.04187e-07	9.32839e-07	5.48279e-07	1.17464e-06	2.67647e-07	6.0781e-07	5.71148e-07	8.01838e-07
Pyrinomonadaceae	0.00819343	0.00671262	0.00794462	0.00778954	0.00744467	0.00751884	0.0078615	0.00695953	0.00794848	0.00792754	0.00997974	0.00859321	0.00656205	0.00632878	0.00739216	0.00666359	0.00975854	0.00882416	0.00848217	0.00880465	0.0113784	0.00934691	0.00905394	0.0111773
Pyrodictiaceae	0	2.19112e-07	1.29856e-06	6.11058e-08	6.17344e-07	1.11096e-06	8.90044e-07	0	5.72608e-07	4.91514e-07	2.91288e-07	1.86021e-07	4.17545e-07	2.11747e-07	6.6542e-08	1.00561e-06	1.49837e-07	9.72722e-08	1.00224e-06	4.82808e-07	7.60761e-08	4.86592e-07	0	2.70785e-07
Pyronemataceae	1.26669e-07	2.02257e-07	2.83148e-07	2.30254e-07	2.96845e-07	0	7.5703e-08	0	8.89211e-07	1.68563e-07	0	6.55622e-07	8.3382e-08	4.35669e-07	3.70321e-07	8.33923e-07	5.41079e-07	6.92275e-07	6.54528e-07	1.32666e-06	3.20425e-07	1.27035e-06	4.27629e-07	4.576e-07
Raineyaceae	1.399e-06	2.24599e-06	1.45028e-06	1.20375e-06	1.87577e-06	2.49946e-06	2.24656e-06	1.16684e-06	9.54267e-07	2.01763e-06	1.12029e-06	8.19724e-07	3.52816e-06	9.47193e-07	1.55744e-06	1.79196e-06	1.32699e-06	1.44258e-06	1.22111e-06	1.19836e-06	6.37023e-07	5.57582e-07	6.64128e-07	1.44621e-06
Ramalinaceae	0	0	0	0	0	0	0	0	0	0	0	0	0	0	0	0	0	0	0	0	6.58569e-07	0	0	0
Rarobacteraceae	5.19012e-07	1.99845e-07	3.90896e-07	4.18435e-07	2.7845e-07	4.59284e-07	8.81548e-07	7.5171e-07	9.09298e-07	1.50904e-06	2.12864e-06	1.44955e-06	2.13499e-06	1.24806e-06	2.08642e-06	5.90572e-07	2.28607e-07	6.90552e-07	6.50363e-07	1.59464e-07	2.45134e-07	4.57171e-07	1.46497e-06	2.88755e-07
Reichenbachiellaceae	1.74826e-05	2.1024e-05	2.31258e-05	1.81109e-05	1.93544e-05	1.77751e-05	2.64229e-05	1.53723e-05	1.59464e-05	2.53286e-05	1.73948e-05	1.97556e-05	2.03943e-05	1.83325e-05	2.17405e-05	1.93258e-05	1.96688e-05	2.14248e-05	2.2007e-05	2.14088e-05	2.17453e-05	1.36931e-05	1.77993e-05	2.0573e-05
Retroviridae	2.3087e-06	1.72325e-06	3.9773e-06	3.36679e-07	4.45017e-06	3.53029e-06	9.23136e-07	9.39391e-06	1.48671e-05	2.41823e-05	5.26768e-06	2.5004e-05	1.50635e-05	5.37193e-05	1.03424e-05	1.2506e-05	2.44271e-05	2.88691e-05	4.241e-05	5.76843e-05	1.27347e-05	8.47373e-05	5.47567e-05	2.16568e-05
Rhabdaerophilaceae	3.86593e-06	5.17241e-06	4.21161e-06	3.89037e-06	2.48853e-06	2.69223e-06	3.54559e-06	3.0474e-06	4.21361e-06	4.97635e-06	5.39524e-06	2.75579e-06	4.12191e-06	4.37507e-06	3.58019e-06	4.62953e-06	7.85949e-06	6.15343e-06	8.42666e-06	5.10323e-06	2.9479e-06	3.85932e-06	2.9916e-06	5.20445e-06
Rhabdochlamydiaceae	2.33796e-07	1.47777e-06	2.7768e-07	2.51075e-06	5.13289e-07	4.08557e-07	7.36911e-07	1.94829e-06	1.21685e-06	2.36929e-06	4.60655e-07	1.34218e-06	3.42657e-06	4.83758e-06	2.23542e-06	3.91906e-06	1.67921e-07	3.00895e-07	0	9.94192e-07	6.75194e-07	3.68589e-07	7.1811e-07	3.88607e-07
Rhizobiaceae	0.00146147	0.00197835	0.00174958	0.00168256	0.00183803	0.00154611	0.00169927	0.00651662	0.00193085	0.00144933	0.00154413	0.00171672	0.00146724	0.00187758	0.00126375	0.00180835	0.00173465	0.00232934	0.00227465	0.00211019	0.00136001	0.00121676	0.00138854	0.00159952
Rhizodiscinaceae	0	4.67178e-07	0	0	0	3.1289e-07	0	0	0	0	6.76361e-07	5.51803e-07	1.75739e-07	4.36505e-07	0	0	0	0	4.40047e-07	0	2.9173e-07	0	0	1.11081e-06
Rhizopodaceae	3.67312e-06	5.49728e-06	4.08272e-06	2.21202e-06	4.50598e-06	3.96801e-06	3.41876e-06	4.24463e-06	1.11538e-05	1.07126e-05	4.2614e-06	1.0204e-05	6.61989e-06	1.53097e-05	4.27115e-06	5.81992e-06	1.23474e-05	7.32136e-06	1.11139e-05	1.68195e-05	6.34539e-06	2.61855e-05	1.99191e-05	6.10449e-06
Rhizopogonaceae	2.13749e-07	0	2.95486e-07	1.12978e-06	5.95332e-07	1.07194e-07	3.50317e-07	4.77877e-08	3.26675e-07	2.67184e-07	1.99592e-06	5.58453e-07	1.33836e-07	7.281e-07	5.92176e-07	5.19907e-07	2.8929e-07	0	0	7.30697e-07	8.26447e-07	1.63051e-06	4.52181e-07	2.25895e-07
Rhodanobacteraceae	0.0077593	0.0122277	0.00837987	0.0116098	0.012292	0.0106942	0.0109717	0.00978872	0.00554202	0.00576502	0.00427019	0.00486893	0.00912938	0.0107997	0.00954816	0.00949211	0.00310967	0.00306185	0.00224991	0.00317309	0.00757729	0.00402572	0.00659101	0.00664433
Rhodobacteraceae	0.00086674	0.000909901	0.000939452	0.000978589	0.000883116	0.000857579	0.000869991	0.000972137	0.000996491	0.000952775	0.000991031	0.00093706	0.000926136	0.000948964	0.000874709	0.000907319	0.00117086	0.00129244	0.00118397	0.0011532	0.000935454	0.000918832	0.000942877	0.000990411
Rhodobiaceae	0.000189418	0.000215021	0.000207223	0.000233595	0.000185474	0.00019704	0.000197385	0.000198926	0.000225605	0.000199491	0.000229019	0.000201295	0.000227422	0.000198939	0.000198213	0.000208766	0.000339631	0.000318725	0.000267453	0.000245734	0.000179106	0.000150538	0.000179377	0.000207262
Rhodocyclaceae	0.00270548	0.00263701	0.0028087	0.00281683	0.00237996	0.00236284	0.00235023	0.00215252	0.00215532	0.00223008	0.00235944	0.00226822	0.0022322	0.00188793	0.00219979	0.00196302	0.00186446	0.00193163	0.00153567	0.00182064	0.00234796	0.00216704	0.00274758	0.00300736
Rhodospirillaceae	0.00936232	0.00790939	0.0114192	0.00754714	0.00678532	0.00703101	0.00661994	0.00743171	0.00962575	0.00962101	0.0103227	0.00927028	0.00769359	0.0093392	0.00651682	0.00837348	0.00999771	0.0119246	0.0109456	0.0105982	0.00818842	0.00760721	0.00822553	0.00997923
Rhodothalassiaceae	2.93692e-06	3.34153e-06	3.70023e-06	2.80482e-06	2.70042e-06	1.75582e-06	2.32963e-06	2.25664e-06	1.34246e-06	3.84603e-06	3.14693e-06	2.75037e-06	4.76774e-06	3.65177e-06	1.63074e-06	2.97857e-06	3.72739e-06	1.76675e-06	2.93235e-06	3.21943e-06	4.08817e-06	1.71905e-06	1.7361e-06	4.31405e-06
Rhodothermaceae	0.000239414	0.000232091	0.00023983	0.000254342	0.000239754	0.000234596	0.000243811	0.000221661	0.000223111	0.000219785	0.00025028	0.000221448	0.00024039	0.000211326	0.000252755	0.000239495	0.000244489	0.000225761	0.000226299	0.000228471	0.000270961	0.000219621	0.000237318	0.000252611
Rickettsiaceae	3.01415e-05	1.82192e-05	5.62025e-05	1.36493e-05	5.3928e-05	4.16995e-05	1.47797e-05	0.000131487	0.00018289	0.000293708	7.68841e-05	0.00032809	0.000178052	0.000625661	0.000143028	0.000184494	0.000289064	0.00039008	0.000462084	0.000704022	0.000152918	0.00105463	0.000673483	0.000270592
Rikenellaceae	1.44904e-05	1.5542e-05	1.38853e-05	1.57021e-05	1.87626e-05	1.87058e-05	1.54772e-05	1.35673e-05	1.4272e-05	1.52892e-05	1.55059e-05	1.48083e-05	1.87556e-05	1.48339e-05	1.49158e-05	1.77983e-05	1.77095e-05	1.63301e-05	1.77636e-05	1.2672e-05	2.27523e-05	8.18682e-06	1.26717e-05	1.58038e-05
Rivulariaceae	1.6302e-05	1.45354e-05	2.02741e-05	1.71147e-05	1.65994e-05	1.96524e-05	1.90981e-05	1.41903e-05	1.54007e-05	1.60153e-05	1.77168e-05	1.60312e-05	1.4996e-05	1.73751e-05	1.53562e-05	1.48952e-05	1.383e-05	1.67574e-05	1.75858e-05	1.56361e-05	2.13092e-05	1.68233e-05	1.58708e-05	1.5245e-05
Roseiarcaceae	1.40638e-05	1.7043e-05	1.77293e-05	1.59046e-05	1.69801e-05	1.59264e-05	1.4991e-05	1.89705e-05	1.44176e-05	1.30537e-05	1.77416e-05	1.16647e-05	1.46305e-05	1.5019e-05	1.31976e-05	1.29095e-05	1.35591e-05	1.27657e-05	1.63908e-05	1.2582e-05	1.33503e-05	8.05919e-06	9.76905e-06	1.72574e-05
Roseiflexaceae	0.000594359	0.000646223	0.000698529	0.000656347	0.00062901	0.000642513	0.000691461	0.000630805	0.000814883	0.000772954	0.00089816	0.000842351	0.00087434	0.00078615	0.000815664	0.000728421	0.000691912	0.000767618	0.000712768	0.000601805	0.000828488	0.000660739	0.000822728	0.00082963
Roseivirgaceae	1.0807e-05	1.30754e-05	1.64185e-05	1.19364e-05	1.39436e-05	1.13889e-05	1.17026e-05	1.16431e-05	1.20973e-05	1.83576e-05	1.6837e-05	1.74206e-05	1.84024e-05	1.23181e-05	1.24205e-05	1.24073e-05	1.37598e-05	1.57889e-05	1.83312e-05	1.20107e-05	1.84866e-05	9.35979e-06	8.77403e-06	1.39233e-05
Ruaniaceae	1.0665e-05	1.58137e-05	1.5567e-05	1.36076e-05	1.72117e-05	1.41773e-05	1.95169e-05	1.77421e-05	1.39413e-05	1.65813e-05	1.37657e-05	1.22897e-05	1.5357e-05	1.4209e-05	1.58337e-05	1.23303e-05	1.32076e-05	1.48433e-05	1.45561e-05	1.54413e-05	1.3159e-05	1.20742e-05	1.71071e-05	1.37071e-05
Rubricoccaceae	4.17739e-05	4.02687e-05	4.8541e-05	5.02701e-05	4.56055e-05	4.05627e-05	4.35042e-05	3.8629e-05	3.96496e-05	4.54152e-05	4.53802e-05	4.20404e-05	4.31194e-05	3.99926e-05	4.30633e-05	4.36386e-05	4.089e-05	3.75669e-05	3.80849e-05	3.51296e-05	5.24064e-05	4.134e-05	4.28647e-05	4.63531e-05
Rubritaleaceae	5.02973e-06	4.95489e-06	6.09916e-06	5.98742e-06	5.00662e-06	2.77721e-06	4.9147e-06	6.0533e-06	6.00637e-06	5.72081e-06	8.96963e-06	5.85625e-06	5.66543e-06	4.24765e-06	7.6429e-06	4.65164e-06	5.59811e-06	5.39564e-06	7.40446e-06	7.74083e-06	4.1633e-06	4.88374e-06	3.56171e-06	5.43416e-06
Rubrobacteraceae	0.000435258	0.00048591	0.000445493	0.000481415	0.000460869	0.000450546	0.000495065	0.000455801	0.000450246	0.000474088	0.000492133	0.000463535	0.000483025	0.000466165	0.000523224	0.000481278	0.000452659	0.000414228	0.000423965	0.000403913	0.000459558	0.000382148	0.000420241	0.000448442
Ruminococcaceae	4.27967e-05	5.27662e-05	4.63677e-05	4.81715e-05	4.86745e-05	4.52077e-05	3.98513e-05	4.24882e-05	5.10417e-05	4.73435e-05	4.03866e-05	4.2032e-05	4.97066e-05	4.3369e-05	5.03162e-05	4.34103e-05	4.25195e-05	4.04337e-05	4.76285e-05	3.77126e-05	6.11086e-05	4.08673e-05	4.24464e-05	4.18303e-05
Russulaceae	0	0	0	0	0	0	0	0	0	0	7.03899e-07	0	0	0	0	0	0	6.01791e-07	0	0	0	0	0	0
Rutstroemiaceae	2.42783e-07	1.70631e-07	3.10676e-07	3.75211e-07	5.96966e-08	0	1.08297e-07	5.36134e-07	0	0	6.22314e-07	2.82802e-07	1.94558e-07	0	4.98209e-07	2.02661e-07	0	0	0	0	0	0	0	0
Saccharataceae	0	0	3.01262e-07	0	0	0	0	0	7.7769e-08	0	0	1.77727e-07	0	0	0	0	0	7.18699e-08	3.59699e-07	1.33259e-07	0	6.38575e-07	0	4.77876e-07
Saccharomycetaceae	4.23529e-06	3.5298e-06	3.75178e-06	4.36282e-06	3.40432e-06	3.47274e-06	3.4758e-06	5.33609e-06	4.1583e-06	6.95411e-06	5.45916e-06	5.62991e-06	3.70831e-06	7.87142e-06	3.05431e-06	3.60018e-06	3.70503e-06	4.73363e-06	3.52348e-06	7.05306e-06	2.01492e-06	1.26932e-05	9.36864e-06	3.04821e-06
Saccharomycodaceae	1.74058e-07	3.15521e-07	3.0228e-07	7.37634e-07	4.14422e-07	5.2057e-07	0	1.82992e-07	3.58672e-07	0	5.0923e-08	2.63543e-07	3.86667e-07	6.01888e-07	1.28408e-07	1.98565e-07	1.43675e-06	1.22312e-06	2.20331e-07	5.35611e-07	8.1876e-07	3.00877e-06	9.58226e-07	6.48686e-08
Saccharospirillaceae	1.36926e-05	2.00993e-05	1.3202e-05	1.32586e-05	1.506e-05	1.44801e-05	1.74235e-05	1.42954e-05	1.1798e-05	1.38174e-05	1.41679e-05	1.17094e-05	1.48052e-05	1.24906e-05	1.47552e-05	1.609e-05	1.49665e-05	1.59884e-05	1.10204e-05	1.25683e-05	1.91717e-05	6.77524e-06	1.11501e-05	1.01079e-05
Saccotheciaceae	1.23913e-06	7.73796e-07	9.67781e-07	1.00432e-06	9.59179e-07	1.09478e-06	1.66796e-06	8.12282e-07	1.4659e-06	2.67991e-07	3.5489e-07	9.5736e-07	9.42852e-07	1.16534e-06	6.10451e-07	6.81705e-07	5.04001e-07	8.23618e-08	8.68659e-07	3.85201e-07	0	1.21966e-07	0	7.16459e-07
Salinarimonadaceae	3.55049e-05	3.16916e-05	3.67049e-05	3.6482e-05	3.16169e-05	2.99968e-05	3.05932e-05	3.89965e-05	2.96105e-05	2.78748e-05	3.97105e-05	3.45886e-05	3.36284e-05	2.91819e-05	3.31757e-05	3.16093e-05	4.42144e-05	5.63716e-05	4.36993e-05	3.8629e-05	3.81639e-05	3.35039e-05	3.61858e-05	3.62186e-05
Salinibacteraceae	6.40351e-06	6.83491e-06	5.44664e-06	6.97334e-06	6.13776e-06	6.40771e-06	6.26295e-06	4.63136e-06	5.8713e-06	6.39318e-06	5.43886e-06	6.77775e-06	6.4702e-06	4.72008e-06	7.75335e-06	5.0895e-06	4.86703e-06	4.50398e-06	5.58707e-06	4.23572e-06	4.78513e-06	7.39216e-06	3.37862e-06	7.05905e-06
Salinisphaeraceae	3.50989e-05	3.38116e-05	2.78541e-05	3.69015e-05	2.83871e-05	3.33513e-05	3.28415e-05	3.53975e-05	3.34577e-05	4.50767e-05	4.12696e-05	4.06338e-05	4.34185e-05	3.08098e-05	4.03329e-05	3.81094e-05	3.9875e-05	3.91752e-05	3.90007e-05	3.39392e-05	2.51352e-05	1.88556e-05	2.74704e-05	2.63805e-05
Salinivirgaceae	5.70006e-07	1.44307e-06	1.71643e-06	1.37414e-06	3.01455e-07	2.22697e-06	7.7468e-07	3.5128e-07	2.01417e-06	9.42897e-07	6.71224e-07	1.17698e-06	1.2756e-06	2.0889e-06	6.47285e-07	1.64811e-06	2.63163e-06	2.65475e-06	2.33988e-06	5.6265e-07	1.37507e-06	1.19755e-06	6.52004e-07	2.30095e-06
Sandaracinaceae	0.000471247	0.000535685	0.000483457	0.000504504	0.000434353	0.000639442	0.000563545	0.000452137	0.000484415	0.000540259	0.000398801	0.000458992	0.000509584	0.000437089	0.000517696	0.000552824	0.000359011	0.000361357	0.00026875	0.000284371	0.000268311	0.00017415	0.000269056	0.000258432
Sanguibacteraceae	3.60812e-06	6.64261e-06	5.4723e-06	7.23676e-06	9.21146e-06	8.4239e-06	8.5246e-06	7.20337e-06	6.11398e-06	4.68819e-06	3.99303e-06	8.52013e-06	6.21202e-06	9.82858e-06	8.27015e-06	5.71414e-06	9.99226e-06	6.93753e-06	5.90589e-06	6.80196e-06	1.22857e-05	7.39984e-06	9.32196e-06	7.53831e-06
Saprospiraceae	7.25096e-05	7.64119e-05	8.62854e-05	7.79176e-05	6.29806e-05	7.00342e-05	6.41e-05	5.34852e-05	0.000128786	0.00012959	0.000126424	0.000125289	0.000127384	8.11517e-05	0.000123037	9.86066e-05	0.000171668	0.000210771	0.000209647	0.000155089	0.000133043	0.000105645	8.6645e-05	0.000128446
Schizoparmaceae	0	7.17094e-08	0	0	0	0	4.45566e-07	0	5.96285e-07	1.41705e-07	9.66701e-07	0	0	0	1.56301e-07	0	8.85402e-08	7.93645e-07	0	4.48321e-07	0	0	9.2081e-08	0
Schizophyllaceae	2.40715e-07	0	2.83148e-07	0	9.07388e-08	4.11624e-07	0	7.45826e-07	0	0	3.01464e-07	0	0	9.02911e-07	1.2608e-07	6.81851e-08	3.67735e-07	1.97957e-07	1.36295e-06	1.73522e-06	6.09147e-07	1.48074e-06	5.70745e-07	8.42153e-08
Schizoporaceae	2.31714e-07	0	0	1.14241e-06	5.56224e-07	1.64212e-07	0	1.59631e-07	3.86474e-07	1.00933e-06	7.24255e-07	7.24071e-07	2.95383e-07	1.63101e-06	1.38589e-06	6.16666e-07	3.10832e-07	6.97762e-07	6.00774e-07	2.33114e-06	4.18032e-07	2.59028e-06	1.44481e-06	9.49942e-07
Schizosaccharomycetaceae	5.7322e-07	2.46501e-07	0	2.48242e-07	1.9444e-07	3.50262e-07	3.24892e-07	3.43189e-07	2.85618e-07	1.27151e-06	0	1.90585e-06	1.59655e-06	3.29377e-06	1.44868e-06	5.25735e-07	1.78321e-06	3.59935e-06	1.48825e-06	2.96607e-06	1.39598e-06	5.01643e-06	5.02757e-06	1.55046e-06
Schizotrichaceae	8.01851e-08	2.17102e-07	9.08429e-08	0	0	7.0807e-08	7.15359e-08	2.75327e-07	3.53171e-07	2.54344e-07	2.07429e-07	5.61849e-07	5.41197e-07	0	0	2.00802e-07	8.93524e-08	0	0	0	0	7.66485e-08	1.58819e-07	0
Schleiferiaceae	1.02734e-06	1.11415e-06	2.21896e-06	2.68884e-06	1.79432e-06	1.99849e-06	9.96517e-07	1.564e-06	2.79734e-06	3.47529e-06	3.36929e-06	2.31338e-06	1.83181e-06	2.86928e-06	2.47293e-06	2.3477e-06	2.9203e-06	3.05214e-06	2.6389e-06	2.24092e-06	3.0712e-06	1.27592e-06	1.69248e-06	2.41477e-06
Sclerodermataceae	0	0	0	0	0	6.51815e-07	9.28263e-08	1.61459e-07	0	3.747e-08	3.84436e-07	2.49135e-07	4.89135e-07	8.18293e-08	4.2777e-07	3.5076e-08	0	1.76535e-06	3.95274e-07	6.93717e-07	0	1.30194e-06	5.1968e-07	4.61565e-08
Sclerotiniaceae	1.37731e-06	2.39554e-06	2.48792e-06	2.41361e-06	2.06425e-06	1.68681e-06	2.91899e-06	2.81076e-06	2.13613e-06	2.74157e-06	1.94811e-06	3.23858e-06	1.39905e-06	6.07467e-06	2.14505e-06	1.85874e-06	5.4873e-06	3.13885e-06	2.72161e-06	4.85183e-06	1.5454e-06	1.05656e-05	4.74612e-06	2.08334e-06
Scytonemataceae	0.000238799	0.000228646	0.000253935	0.000246199	0.000247866	0.000256363	0.000251613	0.00022902	0.000221716	0.000237265	0.000266213	0.000243989	0.000217666	0.000202354	0.000225308	0.000203618	0.000233111	0.000209539	0.000227385	0.000205313	0.000263954	0.000217027	0.000224607	0.000248029
Sedimentisphaeraceae	5.01859e-06	7.71493e-06	6.9636e-06	8.24566e-06	4.96865e-06	7.10172e-06	4.26167e-06	6.07684e-06	5.04341e-06	8.10464e-06	5.85306e-06	6.0243e-06	8.31764e-06	5.04248e-06	6.09506e-06	7.94347e-06	3.45562e-06	4.57329e-06	3.02792e-06	2.31433e-06	5.54437e-06	4.52467e-06	4.2567e-06	3.66077e-06
Segniliparaceae	2.01813e-06	9.1083e-07	5.54507e-07	3.90653e-07	2.11846e-06	1.04439e-06	1.71461e-06	6.17283e-07	6.60713e-07	7.88536e-07	1.71414e-06	2.75565e-06	1.71125e-06	1.30518e-06	2.01869e-06	2.20793e-06	1.34501e-06	8.85245e-07	1.63689e-07	7.16495e-07	1.04103e-06	1.56801e-06	1.34083e-06	4.96979e-07
Selenomonadaceae	1.07182e-05	1.37236e-05	1.41042e-05	1.45426e-05	1.07967e-05	1.18807e-05	1.14659e-05	1.15062e-05	1.22927e-05	1.4075e-05	9.34567e-06	1.2509e-05	1.13986e-05	1.23351e-05	1.18087e-05	1.16832e-05	1.25346e-05	9.77196e-06	9.02754e-06	7.70677e-06	1.07666e-05	1.30353e-05	8.73426e-06	1.15286e-05
Serendipitaceae	2.8038e-07	2.34709e-06	1.87488e-06	3.48118e-07	1.09884e-06	1.69017e-06	1.32609e-06	1.97866e-06	1.16397e-06	1.59104e-06	2.15887e-06	1.0944e-06	1.99257e-06	1.93844e-06	6.24584e-07	8.98994e-07	1.23257e-06	2.09745e-06	2.04775e-06	2.76594e-06	2.5643e-06	2.07501e-06	2.68828e-06	2.47053e-06
Serpulaceae	4.68654e-07	2.42199e-07	1.86823e-06	1.35049e-06	3.73924e-08	6.48568e-08	0	3.31e-07	6.46986e-08	2.6875e-07	8.57428e-07	2.54576e-07	0	3.39592e-07	0	0	5.19792e-07	0	0	4.16291e-07	2.69561e-06	8.68381e-07	7.78341e-07	3.50365e-07
Shewanellaceae	2.59759e-05	3.18272e-05	2.83865e-05	2.86348e-05	2.29287e-05	2.43177e-05	2.40985e-05	2.65474e-05	3.15023e-05	2.81502e-05	3.17731e-05	2.53803e-05	3.03545e-05	2.5005e-05	2.46866e-05	3.03812e-05	2.5913e-05	3.53725e-05	3.15159e-05	2.99365e-05	3.2506e-05	2.2136e-05	2.4585e-05	2.4746e-05
Shiraiaceae	0	0	0	0	3.0655e-08	2.70992e-07	7.50379e-07	0	3.46808e-08	0	0	6.28448e-08	3.155e-08	0	1.0646e-07	6.27858e-07	0	0	0	0	0	0	2.67699e-07	0
Sigmoideomycetaceae	4.4967e-07	6.54854e-07	4.40094e-07	7.02452e-07	6.94053e-07	0	2.04121e-07	1.68382e-06	1.60377e-06	1.86693e-06	2.57198e-07	1.19936e-06	8.73464e-07	2.84906e-06	1.55273e-06	9.9836e-07	1.90919e-06	3.49389e-06	3.24122e-06	1.58529e-06	2.17897e-07	8.37707e-06	3.45232e-06	8.55394e-07
Silvanigrellaceae	2.60344e-06	4.84758e-06	4.91924e-06	3.71124e-06	2.51718e-06	4.51569e-06	3.37278e-06	5.10387e-06	1.46438e-06	4.03995e-06	2.73547e-06	3.30094e-06	5.39058e-06	4.17834e-06	5.71492e-06	3.67119e-06	1.12774e-06	3.90534e-07	2.84115e-06	2.77641e-06	2.44136e-06	3.62675e-06	3.81559e-06	1.94692e-06
Simkaniaceae	2.97272e-07	3.86717e-07	5.03626e-07	9.58111e-07	3.28521e-07	9.1452e-07	6.53705e-07	3.59521e-06	1.59987e-06	9.51534e-07	2.36955e-06	1.00314e-06	2.85643e-06	6.49424e-06	3.13598e-06	6.40333e-06	1.90004e-06	1.37817e-06	7.97345e-07	8.25671e-07	7.87158e-07	1.6787e-06	1.09008e-06	4.94369e-07
Sinobacteraceae	0.000742216	0.000639189	0.00064334	0.000774054	0.000625622	0.000600543	0.000764961	0.00074278	0.000906278	0.000913782	0.00104432	0.0010028	0.000854892	0.000609778	0.000790833	0.000771239	0.000767705	0.000753355	0.000694389	0.00065272	0.000498272	0.000406301	0.000453989	0.000570539
Siphoviridae	5.27962e-05	0.000110138	9.32895e-05	6.59296e-05	5.34222e-05	5.19092e-05	8.18143e-05	5.82938e-05	0.000134375	0.000124355	9.46878e-05	9.11321e-05	0.000106941	9.13173e-05	0.000151208	0.000137743	6.93991e-05	0.000119731	7.52163e-05	7.04589e-05	0.000166778	7.93213e-05	5.94874e-05	8.61863e-05
Sneathiellaceae	5.38597e-05	6.28618e-05	4.68703e-05	6.14783e-05	4.24002e-05	4.37495e-05	5.01892e-05	3.82834e-05	3.95966e-05	4.2635e-05	5.67323e-05	4.63991e-05	4.9833e-05	4.39515e-05	4.16058e-05	4.72244e-05	5.59155e-05	7.87954e-05	6.15387e-05	5.12004e-05	4.15453e-05	3.51003e-05	4.39495e-05	4.62786e-05
Solibacteraceae	0.00437509	0.00522844	0.00461834	0.00462779	0.00590879	0.00581829	0.00550372	0.00547387	0.00266051	0.00267078	0.00301727	0.00300201	0.00313568	0.00297131	0.00315001	0.00368051	0.00193533	0.00179451	0.00178677	0.00167028	0.00207047	0.00171369	0.00184924	0.00203481
Solirubrobacteraceae	0.000576426	0.000574681	0.000644603	0.000617739	0.000799767	0.000775921	0.000757851	0.000782885	0.000981157	0.000971839	0.000993324	0.000964344	0.000983481	0.000874289	0.00108616	0.000990041	0.0013186	0.0011188	0.00116497	0.00149653	0.00135885	0.00160026	0.00150095	0.00152765
Sordariaceae	2.25857e-06	2.507e-06	1.7688e-06	2.64341e-06	2.41101e-06	1.85905e-06	1.02359e-05	2.48692e-06	2.31052e-06	1.35246e-06	1.91737e-06	1.41954e-06	1.3804e-06	1.3109e-06	6.34238e-07	3.08386e-06	2.98075e-07	2.342e-06	1.31526e-06	1.53978e-06	1.94926e-06	1.73907e-06	8.80996e-07	1.0711e-06
Sparassidaceae	2.59272e-07	7.74717e-07	6.95247e-07	9.29938e-07	3.16484e-07	3.1289e-07	4.0757e-07	1.5439e-06	3.64689e-06	2.89658e-06	6.73435e-07	2.56388e-06	2.6198e-06	8.92663e-06	2.24496e-06	2.01742e-06	3.13275e-06	5.22761e-06	6.37656e-06	1.16956e-05	1.09331e-05	1.63104e-05	7.96094e-06	6.10973e-06
Sphaerobacteraceae	0.000219945	0.000289559	0.000202982	0.000278252	0.000276762	0.00026787	0.000276154	0.000267106	0.000203169	0.000248051	0.000198688	0.000236562	0.00028979	0.000341827	0.000293356	0.000280324	0.000156048	0.000158125	0.000171486	0.000198309	0.00019021	0.00027641	0.000240283	0.000190431
Sphaerobolaceae	1.10635e-07	9.56125e-08	3.70676e-07	4.96804e-07	5.04457e-07	2.08593e-07	7.05455e-07	1.63461e-06	2.01052e-06	1.29961e-06	1.45469e-06	2.80849e-06	1.23454e-06	6.63966e-06	1.6805e-06	1.60438e-06	2.08882e-06	3.84906e-06	3.57214e-06	5.75807e-06	1.05504e-06	8.31371e-06	5.4438e-06	1.09725e-06
Sphaerolipoviridae	0	0	0	0	0	0	0	0	0	0	0	0	0	0	4.92228e-07	0	0	0	0	0	0	0	0	0
Sphingobacteriaceae	0.00111719	0.00151244	0.00165206	0.00126492	0.00157992	0.0014856	0.00196023	0.00168672	0.00154576	0.00198578	0.00134811	0.00201652	0.00182699	0.00296164	0.00163516	0.00186539	0.00204147	0.00210683	0.00235224	0.00384275	0.00209976	0.00383737	0.00297831	0.00191613
Sphingomonadaceae	0.0517092	0.0436775	0.0520307	0.0520531	0.0687498	0.0711061	0.0728302	0.0675578	0.0590924	0.0470302	0.0486413	0.0453555	0.0450344	0.0442748	0.0463813	0.043027	0.0537902	0.0549493	0.0519054	0.0520966	0.0589589	0.046679	0.0506176	0.0641207
Spirochaetaceae	4.19372e-05	5.92898e-05	5.91439e-05	5.96396e-05	5.10486e-05	5.55032e-05	5.4577e-05	4.4164e-05	5.32685e-05	4.35943e-05	5.82866e-05	5.10425e-05	5.60755e-05	4.73377e-05	6.11514e-05	5.38217e-05	4.77425e-05	5.93677e-05	5.18769e-05	3.99175e-05	4.78366e-05	3.97475e-05	4.67579e-05	4.63917e-05
Spiroplasmataceae	2.63388e-06	1.76423e-06	6.53093e-06	2.37703e-06	6.16685e-06	4.41989e-06	1.10667e-06	1.60792e-05	2.30451e-05	3.50854e-05	1.41203e-05	4.10747e-05	4.21858e-05	0.00200232	1.51032e-05	2.70165e-05	3.21083e-05	4.3864e-05	5.31545e-05	8.48402e-05	2.04568e-05	0.000126803	8.46761e-05	3.29042e-05
Spirulinaceae	2.08692e-05	1.85997e-05	2.22303e-05	1.96581e-05	1.9426e-05	2.127e-05	1.55051e-05	1.8206e-05	2.02137e-05	2.03041e-05	2.04519e-05	2.14451e-05	1.93651e-05	1.76478e-05	2.03245e-05	2.37014e-05	2.20187e-05	2.10131e-05	1.93523e-05	1.68444e-05	1.94641e-05	1.40218e-05	1.85408e-05	1.66201e-05
Spizellomycetaceae	8.40854e-07	4.56552e-07	2.09929e-06	2.80368e-07	1.8896e-06	1.90542e-06	7.76665e-07	6.59485e-06	4.15243e-06	4.41358e-06	2.33079e-06	6.6117e-06	5.37048e-06	1.46492e-05	2.79272e-06	3.71041e-06	6.29922e-06	9.06522e-06	9.42506e-06	1.40299e-05	4.43282e-06	2.55683e-05	1.6914e-05	7.921e-06
Spongiibacteraceae	2.99134e-05	3.05584e-05	3.15115e-05	3.13526e-05	2.60854e-05	2.58719e-05	3.52435e-05	2.73775e-05	3.50949e-05	3.97707e-05	3.503e-05	3.23894e-05	3.35339e-05	2.90889e-05	3.16735e-05	3.23742e-05	3.50251e-05	3.20856e-05	3.21123e-05	2.88453e-05	3.26946e-05	2.37766e-05	2.31689e-05	2.91592e-05
Sporichthyaceae	0.000141256	0.000188778	0.00014953	0.000155541	0.000266278	0.000262205	0.000288451	0.000269182	0.000185331	0.000188232	0.000176982	0.000172053	0.000166361	0.000188448	0.000165228	0.000165151	0.000235181	0.000268724	0.000270915	0.000227003	0.000142852	0.000161991	0.000147984	0.000229056
Sporidiobolaceae	4.37861e-07	1.37895e-06	2.83211e-06	8.32758e-07	4.14087e-07	6.73785e-07	8.59454e-07	9.75601e-07	8.46802e-07	1.50387e-06	1.62828e-07	2.24012e-06	9.96695e-07	2.02673e-06	1.16193e-06	8.50093e-07	5.62608e-07	1.69664e-06	2.64331e-06	2.15743e-06	2.00697e-06	7.48599e-06	4.39482e-06	1.36797e-06
Sporocadaceae	3.65477e-07	5.05643e-07	1.59321e-07	1.82078e-06	5.46688e-07	2.01203e-07	1.57694e-06	5.61128e-07	3.34218e-07	7.49843e-07	2.44389e-06	1.07132e-06	4.43241e-07	1.54847e-06	1.22847e-07	4.86355e-07	3.42203e-07	6.85969e-07	5.3064e-07	6.65524e-07	1.14608e-07	6.75365e-07	1.9182e-07	0
Sporolactobacillaceae	6.07265e-06	1.11415e-05	5.32369e-06	8.03933e-06	6.21914e-06	8.37142e-06	1.02312e-05	8.89019e-06	7.79631e-06	8.96653e-06	5.95132e-06	9.09204e-06	9.88778e-06	6.75757e-06	9.62014e-06	1.08495e-05	6.26248e-06	5.65277e-06	4.45173e-06	2.85624e-06	7.55691e-06	4.29993e-06	7.67623e-06	9.33841e-06
Sporomusaceae	2.63447e-05	3.30157e-05	3.57683e-05	3.60943e-05	3.02629e-05	3.30688e-05	3.27053e-05	3.32507e-05	3.25219e-05	2.84608e-05	3.49727e-05	3.17283e-05	3.02464e-05	2.77052e-05	2.97317e-05	2.90822e-05	3.23872e-05	2.92141e-05	2.76179e-05	2.53491e-05	3.51167e-05	2.57839e-05	2.95901e-05	3.37969e-05
Sporormiaceae	8.65364e-08	1.56199e-07	5.20267e-07	7.35533e-08	2.60787e-07	2.29246e-07	1.54404e-07	2.97135e-07	5.93628e-07	3.9968e-07	7.14484e-07	7.4531e-07	6.04656e-07	4.22354e-07	2.50817e-07	6.1397e-07	5.69874e-07	8.64784e-07	5.53079e-07	4.95854e-07	1.69086e-07	7.83716e-07	5.82548e-07	1.20007e-07
Spraguidae	5.53176e-08	0	8.72074e-08	1.00554e-07	0	0	0	0	9.74573e-08	0	0	9.37152e-08	0	3.05761e-07	4.20265e-08	2.08452e-07	2.84778e-07	0	7.14845e-08	1.95225e-07	0	1.23996e-06	1.054e-07	0
Stachybotryaceae	1.28532e-07	3.1137e-07	3.49604e-07	2.06331e-07	0	0	0	0	4.81196e-07	4.21284e-07	9.11211e-07	8.71972e-08	3.86951e-07	8.49129e-07	6.90654e-07	1.97184e-07	0	4.2849e-07	4.23545e-07	0	1.29777e-07	6.8189e-07	6.17349e-07	7.44257e-07
Staphylococcaceae	7.3925e-05	8.03772e-05	9.74192e-05	3.0003e-05	7.25061e-05	4.90433e-05	4.04059e-05	9.57079e-05	0.000165754	0.000219275	6.1382e-05	0.000189373	0.000126936	0.000353884	9.42421e-05	0.000116022	0.000204701	0.000274796	0.000266231	0.000372358	0.000115661	0.00054393	0.000364559	0.000149343
Steccherinaceae	1.12054e-07	0	0	3.45019e-07	2.40294e-07	6.33676e-07	5.12988e-08	6.93408e-07	1.43789e-06	1.64122e-06	1.39515e-06	1.99472e-06	1.26988e-06	1.74415e-06	1.31021e-06	1.73969e-06	2.56743e-06	1.79289e-06	2.02953e-06	2.82174e-06	2.31737e-06	7.92641e-06	4.05201e-06	2.71432e-06
Stereaceae	2.00861e-07	0	2.61856e-07	3.26456e-07	7.08897e-08	0	0	3.13434e-07	1.47148e-07	1.05882e-06	3.14025e-07	3.48201e-07	7.29593e-08	6.98028e-07	4.22626e-07	6.34418e-08	0	8.37431e-07	4.74321e-07	7.67357e-07	3.22138e-07	2.20947e-06	3.60651e-07	2.84547e-07
Steroidobacteraceae	0.00192932	0.00173807	0.00243296	0.00258341	0.00113667	0.00105102	0.00280698	0.00203549	0.0021973	0.00170229	0.00272199	0.00219752	0.00171617	0.00159657	0.00138911	0.00215366	0.00204166	0.00314906	0.00182072	0.00199275	0.00275986	0.0020386	0.0024929	0.00232673
Sterolibacteriaceae	0.00017913	0.000172736	0.000208081	0.000181743	0.000161407	0.000157419	0.0001632	0.000150371	0.000164426	0.000171556	0.000178603	0.000165918	0.000165538	0.000147633	0.000155556	0.000161589	0.000179487	0.000161111	0.000161411	0.000153779	0.000153771	0.000132351	0.000151942	0.000171624
Streptococcaceae	2.78589e-05	2.16701e-05	2.68742e-05	2.37867e-05	2.39051e-05	2.62375e-05	2.03978e-05	2.37437e-05	3.2336e-05	3.92091e-05	2.83965e-05	3.80989e-05	3.05471e-05	4.84798e-05	2.64276e-05	2.88404e-05	4.0309e-05	4.10394e-05	4.85867e-05	5.49181e-05	3.11782e-05	6.42338e-05	5.00811e-05	3.19427e-05
Streptomycetaceae	0.00244561	0.00285112	0.0034315	0.00259268	0.00421816	0.00482409	0.00495228	0.00463174	0.00324815	0.00913469	0.003808	0.00662073	0.00290984	0.00448143	0.00269733	0.00336209	0.00399294	0.00637079	0.0044285	0.00863586	0.0064989	0.00345818	0.0054909	0.00468643
Streptosporangiaceae	0.000815245	0.000986596	0.000950274	0.000908224	0.0011473	0.00121205	0.00121158	0.00129506	0.000881872	0.000859707	0.0010421	0.000974505	0.000887539	0.000857703	0.000838425	0.000988662	0.000729518	0.000932487	0.00072503	0.000666964	0.000776435	0.000554862	0.000872724	0.000683073
Strophariaceae	1.5869e-06	3.8868e-06	2.21995e-06	1.8922e-06	1.09664e-06	2.93929e-07	4.93507e-07	4.69491e-07	2.47928e-06	2.99845e-06	2.63209e-06	1.82442e-06	1.9155e-06	1.10525e-06	4.24719e-07	7.70601e-07	1.68602e-06	2.26971e-06	2.15284e-06	2.65564e-06	2.68769e-06	6.08846e-06	3.7484e-06	1.08796e-06
Succinivibrionaceae	2.20061e-07	1.40619e-06	5.72847e-07	7.29904e-07	7.50847e-07	3.06701e-07	1.41893e-06	6.2869e-07	1.33223e-06	6.57482e-07	3.99924e-07	1.47977e-06	5.63321e-07	9.13585e-07	1.72468e-06	1.13488e-06	2.21692e-07	2.30161e-06	1.0089e-06	7.6248e-07	5.91597e-07	1.56124e-06	1.0669e-06	2.17155e-07
Suillaceae	1.81533e-06	1.16077e-06	8.08496e-07	1.02346e-06	8.4102e-07	2.02179e-06	6.16199e-07	1.87535e-06	8.93403e-07	1.74731e-06	2.02006e-06	5.11456e-07	9.36954e-07	1.0426e-06	4.94136e-07	1.54723e-06	5.24008e-07	3.79034e-06	6.44853e-07	2.56949e-07	1.60103e-06	4.17734e-07	2.07387e-07	1.81419e-06
Sulfolobaceae	9.00818e-07	6.76432e-07	1.41734e-06	1.27485e-06	8.94272e-07	5.50615e-07	4.44114e-07	5.92065e-07	7.22429e-07	1.65754e-06	2.11663e-06	2.72078e-06	1.31912e-06	8.98676e-07	1.78537e-06	6.74975e-07	4.59589e-07	7.10185e-07	1.75804e-06	7.26588e-07	7.9884e-07	7.69694e-07	1.72089e-06	4.78088e-07
Sutterellaceae	1.49493e-05	1.43587e-05	1.3368e-05	1.33573e-05	1.10949e-05	1.25218e-05	1.40858e-05	1.10359e-05	1.26459e-05	8.91319e-06	1.38123e-05	9.6365e-06	1.20357e-05	1.13492e-05	1.25329e-05	1.02353e-05	1.13731e-05	1.20047e-05	1.08044e-05	1.39721e-05	9.80257e-06	8.90544e-06	1.1992e-05	9.5785e-06
Symbiobacteriaceae	4.71601e-06	7.54019e-06	6.98541e-06	6.28439e-06	8.2643e-06	9.96343e-06	8.83586e-06	8.37538e-06	7.19642e-06	8.53724e-06	9.48197e-06	7.33721e-06	6.91339e-06	6.22898e-06	6.88856e-06	7.94811e-06	5.56098e-06	4.14648e-06	4.16217e-06	4.00964e-06	5.37752e-06	5.70469e-06	5.7129e-06	7.07279e-06
Symphyonemataceae	1.90706e-05	1.62675e-05	1.97524e-05	2.00317e-05	2.44514e-05	2.29788e-05	1.97404e-05	2.2477e-05	1.80936e-05	1.76298e-05	2.16611e-05	1.93871e-05	1.93831e-05	1.837e-05	1.96134e-05	2.04944e-05	1.45211e-05	1.5628e-05	1.38117e-05	1.47367e-05	1.9339e-05	1.5865e-05	1.37971e-05	1.36126e-05
Sympoventuriaceae	7.84018e-07	4.717e-07	8.71191e-07	8.13771e-07	1.39011e-06	1.58413e-06	1.54261e-06	6.34979e-07	8.64818e-07	1.1558e-06	7.58514e-07	3.50531e-07	1.29705e-07	9.11238e-07	7.58907e-07	6.52095e-07	1.09432e-07	4.23134e-07	1.04579e-07	5.4342e-07	9.91553e-08	1.08502e-07	0	3.47257e-07
Syncephalastraceae	1.19728e-07	8.16415e-07	3.86842e-07	6.83905e-07	4.31708e-07	1.02906e-07	6.07059e-07	1.59113e-06	1.1313e-06	2.26317e-06	5.79735e-07	1.92939e-06	1.98072e-06	5.61022e-06	4.98155e-07	1.76761e-06	2.11791e-06	2.82594e-06	4.02084e-06	3.58249e-06	1.15524e-06	7.84589e-06	3.89966e-06	1.91526e-06
Synchytriaceae	1.21172e-06	2.95468e-06	2.2762e-06	5.83187e-07	3.32863e-06	2.4231e-06	7.29286e-07	2.98626e-06	6.89591e-06	5.28671e-06	1.3625e-06	5.40125e-06	2.99375e-06	1.43132e-05	2.27922e-06	4.40734e-06	8.48776e-06	5.5187e-06	9.71525e-06	1.52894e-05	4.0767e-06	2.47003e-05	1.55975e-05	7.3271e-06
Synechococcaceae	0.000102963	0.000105269	0.000104012	0.000118108	9.74863e-05	0.000102256	0.000105834	9.98757e-05	0.000107169	9.88737e-05	0.000121883	0.000100892	0.000104528	9.92637e-05	0.000103181	0.000104554	0.000106237	0.000100496	0.000106099	9.99416e-05	0.000119996	9.30453e-05	0.000102023	9.78704e-05
Synergistaceae	2.03741e-05	1.81304e-05	2.26861e-05	1.94265e-05	2.04091e-05	1.7458e-05	2.09414e-05	1.86635e-05	1.58754e-05	1.68742e-05	2.2559e-05	2.01584e-05	1.72568e-05	1.83796e-05	1.62702e-05	2.02918e-05	1.79082e-05	2.10837e-05	1.45057e-05	1.55932e-05	1.78174e-05	1.27768e-05	1.63869e-05	2.17934e-05
Syntrophaceae	0.000211763	0.000212049	0.000208598	0.000228729	0.000208445	0.000200525	0.000212712	0.000191696	0.000184393	0.000196455	0.000227542	0.000206089	0.000209413	0.000179056	0.000214296	0.000212403	0.00019803	0.000183516	0.000183009	0.000171914	0.000197014	0.000150918	0.000177528	0.000205834
Syntrophobacteraceae	0.00011028	0.000118909	0.000120675	0.000131254	0.000122676	0.000104644	0.000116565	0.000120395	0.000113049	0.000109829	0.000118431	0.000123778	0.000121753	0.000106635	0.000115947	0.000119413	0.00010617	0.000101138	0.000134389	0.000106898	0.000123242	9.32216e-05	9.89298e-05	0.000100852
Syntrophomonadaceae	2.6636e-05	2.60976e-05	2.63286e-05	3.58656e-05	3.09995e-05	3.26458e-05	2.46533e-05	2.43241e-05	2.37175e-05	1.99681e-05	2.94301e-05	2.46679e-05	3.059e-05	1.92986e-05	3.10853e-05	2.78617e-05	2.40833e-05	2.34704e-05	2.16449e-05	2.34374e-05	2.75425e-05	1.80503e-05	1.91341e-05	2.31435e-05
Syntrophorhabdaceae	5.92005e-05	6.62277e-05	6.43487e-05	6.42711e-05	5.67573e-05	5.83531e-05	6.88011e-05	5.94512e-05	5.61176e-05	5.76306e-05	6.41328e-05	6.02329e-05	5.62919e-05	5.23069e-05	6.08681e-05	6.37094e-05	4.80557e-05	4.52107e-05	5.19524e-05	4.32833e-05	5.98597e-05	4.1797e-05	4.19956e-05	4.88294e-05
Tannerellaceae	1.32713e-05	1.04426e-05	1.14722e-05	1.69378e-05	1.40331e-05	1.26008e-05	9.35864e-06	1.00857e-05	1.23186e-05	1.48783e-05	1.64653e-05	1.28935e-05	1.42118e-05	1.31515e-05	1.11924e-05	1.58301e-05	1.3832e-05	1.20554e-05	1.13407e-05	1.3218e-05	1.30702e-05	1.01532e-05	1.10888e-05	1.43436e-05
Taphrinaceae	0	0	0	0	0	0	0	0	0	9.99199e-08	0	1.3415e-07	0	0	0	0	3.69851e-07	0	0	1.34113e-07	0	9.10447e-07	1.10969e-07	0
Tectiviridae	1.93275e-06	1.12303e-05	5.49484e-06	5.43001e-06	1.25978e-05	1.46585e-05	9.62259e-06	1.12453e-05	9.60026e-06	4.32567e-06	2.22637e-06	4.858e-06	5.59179e-06	6.77996e-06	2.28072e-06	4.71628e-06	8.4341e-07	5.3347e-06	5.2633e-07	8.74507e-07	1.90926e-05	2.39856e-06	4.37529e-06	6.50168e-06
Tenuifilaceae	4.11523e-07	4.46058e-07	1.04776e-06	1.60626e-06	1.00831e-06	1.01227e-06	9.78023e-07	1.41675e-06	8.5838e-07	1.0297e-06	1.04546e-06	8.71495e-07	9.55079e-07	1.29419e-06	1.60233e-06	2.64636e-06	8.07153e-07	0	0	6.56642e-07	3.22745e-07	1.24697e-07	4.36678e-07	1.39138e-07
Tepidiformaceae	3.46314e-05	4.35422e-05	4.16212e-05	2.66098e-05	2.3882e-05	2.37702e-05	2.1857e-05	2.14002e-05	5.16014e-05	4.91349e-05	5.69382e-05	5.90236e-05	5.72322e-05	5.18905e-05	7.09734e-05	5.72666e-05	2.94562e-05	2.78142e-05	2.28968e-05	2.93867e-05	4.69633e-05	3.64584e-05	4.83448e-05	3.96566e-05
Teratosphaeriaceae	6.25075e-07	1.78315e-06	9.63635e-07	1.87427e-06	1.30469e-06	1.59932e-06	3.32953e-06	1.10153e-06	1.41213e-06	8.66612e-07	2.4181e-06	5.52901e-07	1.05778e-06	2.20925e-06	1.01184e-06	1.75182e-06	6.38421e-07	1.97188e-06	1.55828e-06	1.54541e-06	1.33761e-06	3.47545e-06	2.9693e-06	1.1395e-06
Terrimicrobiaceae	1.1675e-05	2.2304e-05	1.07487e-05	1.84947e-05	1.92806e-05	1.92395e-05	1.917e-05	1.81789e-05	1.42088e-05	1.34982e-05	1.21838e-05	1.49995e-05	1.24329e-05	1.1217e-05	1.43875e-05	1.41265e-05	1.59292e-05	1.95201e-05	1.31515e-05	1.1728e-05	1.09378e-05	8.31996e-06	1.05005e-05	1.05622e-05
Tetraplosphaeriaceae	3.57216e-07	1.20428e-07	1.06518e-07	8.53802e-08	2.9166e-07	1.17831e-07	1.32191e-06	4.46495e-07	4.11491e-07	2.01563e-07	5.23896e-07	1.58007e-07	6.37963e-07	9.30388e-08	6.96097e-07	4.8208e-07	7.43467e-08	4.94656e-07	3.22701e-07	3.78735e-07	5.77344e-07	1.41958e-07	4.66074e-07	7.68843e-07
Thelephoraceae	0	0	0	0	0	0	0	0	0	0	8.70548e-07	0	0	0	0	0	0	0	0	0	0	0	0	0
Thermaceae	0.000172852	0.000172286	0.000169887	0.000174657	0.000175592	0.000164933	0.000165	0.000152895	0.000156025	0.000161672	0.000172778	0.000160482	0.000162675	0.000152215	0.000173034	0.000166067	0.000143519	0.000139669	0.000133808	0.000141409	0.000159944	0.000125573	0.000153581	0.000151799
Thermithiobacillaceae	4.68974e-05	4.54872e-05	4.17137e-05	4.85137e-05	4.41434e-05	4.00635e-05	3.93371e-05	3.94972e-05	4.4321e-05	4.21002e-05	4.11295e-05	4.68555e-05	4.93372e-05	4.1084e-05	4.70649e-05	5.04607e-05	3.98052e-05	3.2934e-05	3.7546e-05	3.26171e-05	4.50327e-05	3.44873e-05	3.78878e-05	4.44722e-05
Thermoactinomycetaceae	4.85814e-05	5.21472e-05	5.52963e-05	5.64609e-05	5.1066e-05	5.59066e-05	4.87949e-05	4.9831e-05	7.36751e-05	7.44565e-05	6.91486e-05	6.43759e-05	6.00363e-05	5.16217e-05	5.29646e-05	5.14866e-05	4.33168e-05	4.68664e-05	4.21534e-05	4.00473e-05	4.80891e-05	4.31695e-05	4.34982e-05	4.24091e-05
Thermoanaerobacteraceae	5.13993e-05	5.76519e-05	5.18082e-05	6.02347e-05	5.8006e-05	5.82965e-05	5.45762e-05	5.62654e-05	5.2863e-05	6.13822e-05	6.08345e-05	5.73065e-05	5.27043e-05	5.65204e-05	5.97209e-05	5.62276e-05	5.34237e-05	5.08901e-05	4.15747e-05	5.20214e-05	5.08091e-05	3.98263e-05	4.59958e-05	5.09321e-05
Thermoanaerobacterales_Family_III._Incertae_Sedis	9.41206e-06	9.68861e-06	9.39809e-06	1.00288e-05	6.60949e-06	8.19831e-06	8.90161e-06	8.31622e-06	7.17483e-06	9.84882e-06	9.45409e-06	7.65949e-06	1.30151e-05	9.3892e-06	7.37877e-06	9.21551e-06	1.09054e-05	9.61305e-06	7.87132e-06	7.85023e-06	9.19542e-06	7.71232e-06	6.95555e-06	8.82185e-06
Thermoanaerobacterales_Family_IV._Incertae_Sedis	6.10727e-07	2.23441e-06	1.10618e-06	1.57148e-06	1.57113e-06	2.53621e-06	1.76139e-06	9.16278e-07	1.18564e-06	8.66897e-07	9.49873e-07	9.03267e-07	2.48339e-06	1.72864e-06	1.54747e-06	8.76365e-07	1.7278e-06	9.44853e-07	1.37507e-06	4.37905e-07	1.10344e-06	1.93305e-07	2.01827e-07	1.79161e-07
Thermoanaerobaculaceae	1.50659e-05	2.25918e-05	2.52431e-05	2.0525e-05	2.00446e-05	2.0731e-05	2.12633e-05	1.98247e-05	2.59128e-05	2.6717e-05	2.50983e-05	2.74682e-05	2.23291e-05	1.82125e-05	2.77315e-05	2.21354e-05	2.26904e-05	2.89621e-05	2.25488e-05	2.12042e-05	1.93871e-05	2.1697e-05	1.8681e-05	2.70426e-05
Thermoascaceae	0	0	1.65277e-07	0	1.74498e-07	0	0	9.61881e-08	0	0	7.04355e-08	9.05945e-08	6.54588e-08	8.47846e-07	3.75158e-07	6.81851e-08	0	3.14951e-07	0	0	1.14608e-07	1.50527e-06	0	0
Thermococcaceae	1.15609e-05	1.03001e-05	9.41315e-06	1.17511e-05	1.36451e-05	1.31043e-05	1.14231e-05	1.23535e-05	9.83916e-06	1.37436e-05	1.38373e-05	1.19763e-05	1.0873e-05	9.85034e-06	1.02725e-05	1.38526e-05	1.1036e-05	9.5022e-06	1.26497e-05	8.34377e-06	1.19722e-05	1.26287e-05	1.2553e-05	1.52719e-05
Thermodesulfobacteriaceae	2.22534e-05	2.10207e-05	2.37387e-05	2.52642e-05	3.15839e-05	2.76491e-05	2.80587e-05	2.42798e-05	1.78107e-05	1.97192e-05	2.16336e-05	1.68555e-05	2.77067e-05	2.13024e-05	2.14781e-05	2.17634e-05	1.43731e-05	1.66298e-05	1.96816e-05	1.36555e-05	1.88687e-05	1.73024e-05	1.40383e-05	1.71108e-05
Thermodesulfobiaceae	2.05771e-06	1.09818e-06	1.46637e-06	2.0197e-06	8.6654e-07	9.81017e-07	2.38126e-06	1.5849e-06	2.60958e-06	1.53786e-06	2.42726e-06	3.39111e-06	2.24995e-06	2.46651e-06	2.68489e-06	1.09939e-06	1.72634e-06	7.86298e-07	1.55048e-06	1.102e-06	1.26659e-06	1.19229e-06	2.22969e-06	2.57655e-06
Thermofilaceae	2.01167e-06	2.02983e-06	1.31543e-06	3.41205e-06	2.20111e-06	1.10695e-06	2.10217e-06	1.46333e-06	1.83816e-06	1.99368e-06	1.5454e-06	2.22228e-06	1.7581e-06	1.58471e-06	2.2539e-06	3.41457e-06	5.19306e-07	6.68131e-07	2.04118e-06	1.29371e-06	1.07588e-06	1.26001e-06	2.18502e-06	2.57075e-06
Thermoflexaceae	8.68596e-06	8.32475e-06	8.63754e-06	6.20216e-06	8.80339e-06	6.96936e-06	6.16142e-06	8.01346e-06	6.16554e-06	8.07535e-06	9.06441e-06	5.5068e-06	7.71017e-06	9.03607e-06	7.06948e-06	7.69721e-06	5.64244e-06	6.45902e-06	2.92865e-06	3.68877e-06	4.58218e-06	5.62193e-06	4.11257e-06	8.17512e-06
Thermoflexibacteraceae	8.50968e-06	7.48866e-06	7.93089e-06	8.87181e-06	6.57415e-06	6.92764e-06	7.02388e-06	7.32072e-06	7.00388e-06	6.76928e-06	7.60633e-06	9.68559e-06	6.18993e-06	4.45968e-06	7.26769e-06	7.3057e-06	5.47165e-06	6.78134e-06	6.31639e-06	6.61267e-06	8.10402e-06	4.02205e-06	5.35547e-06	5.78963e-06
Thermogemmatisporaceae	0.000355562	0.000539583	0.000227648	0.000517926	0.000517215	0.000524384	0.000595705	0.000521967	0.000203334	0.000282629	0.000216144	0.000222881	0.000466936	0.000444874	0.000444069	0.000464391	6.11077e-05	4.72387e-05	4.42813e-05	5.45328e-05	0.000113999	6.36508e-05	0.000104399	0.000100129
Thermoguttaceae	8.01748e-06	1.30991e-05	1.36556e-05	1.27545e-05	1.52652e-05	1.67263e-05	1.22001e-05	1.41853e-05	1.08937e-05	1.131e-05	1.09495e-05	1.0612e-05	1.03232e-05	1.08011e-05	1.14545e-05	1.11465e-05	1.12057e-05	6.43399e-06	1.63942e-05	9.36806e-06	9.94095e-06	8.6334e-06	6.0064e-06	6.23039e-06
Thermoleophilaceae	0.000275844	0.000303286	0.000320087	0.000304955	0.000389964	0.00037674	0.000386736	0.000397114	0.000470598	0.000452186	0.000486185	0.000471226	0.000425738	0.000398882	0.000458973	0.00041979	0.000597312	0.000536192	0.00126961	0.00063508	0.000556406	0.000533178	0.000506402	0.000548661
Thermomicrobiaceae	2.37615e-05	2.80272e-05	2.19466e-05	2.77923e-05	2.38429e-05	2.70812e-05	2.5258e-05	2.71739e-05	2.68148e-05	1.81914e-05	2.63377e-05	2.26206e-05	2.40411e-05	2.70816e-05	2.75477e-05	2.48697e-05	1.72139e-05	1.65866e-05	1.54841e-05	1.45971e-05	2.38194e-05	1.54907e-05	1.94666e-05	2.23831e-05
Thermomonosporaceae	0.000553863	0.000671302	0.000842203	0.000662817	0.000929739	0.000992481	0.00103136	0.000991498	0.00187483	0.00128596	0.00142714	0.00124684	0.000670776	0.000704885	0.000645368	0.000708001	0.000530378	0.000536501	0.000491467	0.000443421	0.000522256	0.000390733	0.00106531	0.000482748
Thermonemataceae	3.31636e-06	3.98717e-06	3.17241e-06	3.30212e-06	1.81207e-06	3.33416e-06	2.84828e-06	2.48241e-06	3.45101e-06	4.03725e-06	4.73536e-06	4.19866e-06	3.97424e-06	1.91289e-06	3.54641e-06	2.59992e-06	2.19552e-06	4.27055e-06	3.98969e-06	3.38369e-06	3.69306e-06	2.6838e-06	3.47027e-06	3.79e-06
Thermoplasmataceae	0	3.52144e-07	0	7.2216e-07	4.61518e-07	2.00466e-07	6.66056e-07	3.41704e-07	0	6.33638e-08	4.19223e-07	9.15358e-08	1.11663e-07	5.76439e-07	4.77717e-07	1.7563e-07	1.55271e-07	7.93376e-07	0	0	6.89439e-08	0	0	7.50043e-08
Thermoproteaceae	7.64787e-07	1.18085e-06	8.99984e-07	7.42878e-07	1.51746e-06	6.03486e-07	1.42272e-06	4.59819e-07	1.63974e-06	1.1965e-06	7.00673e-07	3.60065e-07	7.67439e-07	1.5178e-06	1.33754e-06	2.7897e-06	1.15944e-06	1.06449e-07	1.49262e-06	1.25804e-06	1.38939e-06	1.03144e-06	1.87721e-07	1.28915e-06
Thermosporotrichaceae	0.000138423	0.000212219	9.9417e-05	0.000209494	0.000202898	0.000221492	0.000305539	0.000196623	9.84253e-05	0.000124747	9.98679e-05	9.528e-05	0.000182741	0.000202453	0.000188799	0.000180463	3.99011e-05	2.92736e-05	3.04373e-05	3.13163e-05	6.47056e-05	3.5074e-05	5.21086e-05	5.29573e-05
Thermotogaceae	1.14833e-05	1.59855e-05	1.62763e-05	1.47188e-05	1.26428e-05	1.25488e-05	1.37542e-05	1.06212e-05	1.29573e-05	1.46552e-05	1.73128e-05	1.49094e-05	1.20969e-05	1.09079e-05	1.06647e-05	1.12697e-05	1.08678e-05	1.29981e-05	1.03641e-05	8.99174e-06	1.00825e-05	8.2129e-06	1.08289e-05	1.22042e-05
Thioalkalibacteraceae	1.83028e-06	1.30283e-06	1.48516e-06	9.02421e-07	1.47989e-06	1.76242e-06	1.31045e-06	3.26919e-07	1.95011e-06	1.93762e-06	1.41226e-06	1.31168e-06	1.24133e-06	1.14241e-06	1.78345e-06	3.38611e-06	7.75471e-07	1.47446e-06	1.6783e-06	1.17713e-06	2.93065e-06	1.27481e-06	1.55821e-06	2.2335e-06
Thioalkalispiraceae	1.42917e-05	1.14141e-05	1.5545e-05	1.49138e-05	1.21328e-05	1.12199e-05	1.02634e-05	1.74679e-05	1.33194e-05	1.40699e-05	1.42977e-05	1.33148e-05	1.61499e-05	1.16818e-05	1.77578e-05	1.26862e-05	1.21147e-05	9.65359e-06	9.93502e-06	1.05146e-05	9.0145e-06	8.15399e-06	9.40151e-06	7.44684e-06
Thiobacillaceae	0.000160639	0.000158676	0.000177298	0.000167263	0.000161188	0.000152891	0.000158917	0.000149978	0.000151886	0.000150933	0.000144321	0.000147906	0.000157066	0.000133097	0.000151845	0.000153099	0.00014534	0.000161492	0.000120942	0.000125037	0.000128334	0.000111855	0.000134887	0.000166842
Thiofilaceae	1.18133e-06	1.14979e-06	1.86406e-06	2.59613e-06	2.66775e-06	2.54497e-06	2.54398e-06	1.63757e-06	1.92798e-06	1.47601e-06	1.34463e-06	2.275e-06	2.00802e-06	1.31574e-06	2.03507e-06	1.24506e-06	1.03582e-06	2.06852e-06	2.95925e-06	3.28008e-06	5.06606e-07	1.46921e-06	7.35266e-07	9.03223e-07
Thiolinaceae	1.31112e-06	1.26039e-06	1.63437e-06	2.15639e-06	1.44546e-06	2.06924e-06	7.49562e-07	1.44248e-06	1.94042e-06	2.43926e-06	2.67582e-06	3.33198e-06	1.97543e-06	1.08522e-06	2.44686e-06	1.6705e-06	1.61474e-06	2.20725e-06	2.4027e-06	2.10234e-06	1.49852e-06	1.32982e-06	2.38919e-06	1.65111e-06
Thiotrichaceae	0.00014192	0.000149351	0.000144336	0.000172519	0.000132777	0.00013106	0.000143146	0.000133665	0.000158416	0.000161397	0.000155416	0.000148822	0.000151903	0.00013081	0.000156362	0.000139002	0.000151005	0.000158993	0.00013017	0.000150761	0.000163453	0.000129876	0.000138686	0.000158955
Thorselliaceae	2.18504e-07	9.86004e-08	5.81005e-07	0	1.70135e-07	5.8251e-07	4.92273e-07	2.28262e-07	9.62391e-08	1.94844e-07	3.75667e-07	4.29466e-07	8.75511e-08	1.69796e-07	6.61874e-07	8.5767e-07	3.79458e-07	2.9308e-07	1.41182e-07	0	4.72974e-07	0	1.08195e-07	1.24682e-07
Tilletiaceae	1.58103e-06	4.21591e-06	3.30179e-06	2.49493e-06	5.39328e-06	1.80439e-06	2.20216e-06	8.51716e-06	1.07908e-05	1.3853e-05	4.27978e-06	1.58233e-05	8.41096e-06	2.39034e-05	7.54077e-06	8.34134e-06	2.00809e-05	1.64464e-05	1.95708e-05	3.05951e-05	7.32597e-06	3.93777e-05	3.25906e-05	1.50561e-05
Tilletiariaceae	0	0	0	0	0	0	0	0	0	1.76081e-07	6.97833e-08	9.30103e-08	9.33879e-08	6.17221e-07	0	0	3.33665e-07	1.00052e-06	3.76485e-07	9.68595e-08	0	1.73739e-06	3.46225e-07	0
Tissierellaceae	5.41381e-06	7.18479e-06	5.59705e-06	6.77514e-06	5.28904e-06	5.06708e-06	3.80767e-06	7.97448e-06	1.44089e-05	1.56593e-05	5.96232e-06	1.66696e-05	1.38168e-05	3.21516e-05	8.92303e-06	1.26062e-05	1.73889e-05	2.11726e-05	2.22676e-05	3.33521e-05	9.11945e-06	6.66686e-05	3.41999e-05	1.53693e-05
Togniniaceae	0	0	9.55928e-08	1.01843e-07	1.74498e-07	0	1.30668e-06	9.45048e-07	4.93534e-07	9.99199e-08	2.27854e-06	5.50719e-07	2.8395e-07	2.21473e-07	9.2135e-08	0	0	0	4.38216e-07	1.30775e-06	1.13139e-07	0	4.94607e-07	3.94543e-07
Tolypothrichaceae	9.89422e-05	9.26014e-05	0.000109141	9.49169e-05	0.000100095	0.00010395	0.00010974	9.19224e-05	9.07673e-05	8.61434e-05	0.000100049	9.10933e-05	8.5809e-05	8.63435e-05	9.56938e-05	9.02735e-05	8.16243e-05	6.88481e-05	7.73391e-05	8.40004e-05	9.93279e-05	8.00581e-05	7.72859e-05	8.98726e-05
Treboniaceae	0.000267303	0.000364648	0.000225517	0.000379104	0.000403292	0.000485025	0.000370304	0.00046711	0.000113934	0.000117048	0.000103502	0.000117115	0.000203487	0.000265048	0.000210228	0.000273066	5.25801e-05	5.67826e-05	5.1943e-05	3.90664e-05	5.23448e-05	3.55974e-05	4.21408e-05	4.71471e-05
Trematosphaeriaceae	0	4.37895e-07	3.67069e-07	5.79836e-08	9.45196e-08	1.17317e-06	1.02891e-06	1.18366e-06	3.99955e-07	0	0	2.61953e-07	3.20513e-07	7.43602e-07	0	0	2.563e-07	1.01303e-06	6.52422e-07	4.12928e-07	8.99316e-07	0	9.72541e-08	0
Tremellaceae	2.40363e-07	3.42958e-07	5.81205e-07	3.05529e-07	2.9206e-07	8.97437e-08	0	5.46172e-07	1.41158e-06	1.51658e-06	7.32703e-07	1.30987e-06	4.59231e-07	1.01856e-06	4.40517e-07	5.28682e-07	5.7603e-07	7.95607e-07	1.30729e-06	1.90507e-06	4.09881e-07	3.11757e-06	1.60341e-06	3.41418e-07
Trichocomaceae	1.1393e-06	2.87956e-06	4.08801e-06	1.94343e-06	3.84638e-06	1.49357e-06	2.32281e-06	2.2652e-06	5.11976e-06	3.75672e-06	3.46946e-06	3.54487e-06	1.46138e-06	3.34755e-06	2.36209e-06	4.12978e-06	6.28372e-06	1.35098e-06	2.30899e-06	5.31611e-06	4.28643e-06	4.73362e-06	5.42321e-06	3.83647e-06
Tricholomataceae	1.42319e-06	2.60193e-06	1.09426e-06	8.76645e-07	1.90216e-06	1.41156e-06	1.63616e-06	7.66585e-07	1.60818e-06	1.03937e-06	3.15009e-06	8.85294e-07	7.30762e-07	2.44875e-06	1.53579e-06	6.15329e-07	8.32484e-07	9.28878e-07	1.21703e-06	2.39281e-06	3.33611e-06	6.50161e-06	1.72841e-06	1.32773e-06
Trichomeriaceae	0	4.8843e-07	0	9.80711e-08	4.20087e-08	9.52834e-08	0	8.75016e-07	0	0	0	0	0	0	0	5.09989e-07	0	0	0	0	0	0	0	0
Trichomonascaceae	3.09723e-06	1.58405e-06	1.97098e-06	3.26599e-06	3.39266e-06	2.74878e-06	2.0988e-06	2.91842e-06	1.52002e-06	1.63153e-06	1.07706e-06	2.73989e-06	1.18554e-06	4.33643e-06	1.18852e-06	1.89013e-06	1.80722e-06	1.63795e-06	6.21384e-07	3.98219e-06	3.16196e-06	5.11017e-06	1.8598e-06	1.19051e-06
Trichosporonaceae	1.58663e-06	1.00806e-06	1.53495e-06	3.68043e-07	1.58821e-06	8.34953e-07	3.87205e-07	2.62378e-06	3.13498e-06	5.75222e-06	1.6381e-06	5.97491e-06	3.50713e-06	1.01408e-05	2.87623e-06	4.95572e-06	5.83515e-06	6.25816e-06	6.86515e-06	1.23929e-05	2.6777e-06	1.55409e-05	1.04871e-05	4.4368e-06
Trigonopsidaceae	0	0	0	0	0	3.4302e-07	1.01265e-07	0	0	8.65972e-08	0	4.34201e-07	2.38409e-07	7.48201e-07	7.98504e-08	8.10646e-08	4.99457e-07	4.92589e-07	7.29865e-07	1.29201e-06	0	1.12406e-06	9.94815e-07	0
Trimorphomycetaceae	8.92189e-07	1.46719e-06	2.83001e-07	3.89844e-07	9.16949e-07	9.33574e-07	1.84215e-06	1.2074e-06	6.70835e-07	8.72447e-07	8.27858e-07	3.33646e-07	3.91905e-07	7.90225e-07	8.69778e-07	1.16265e-06	7.01644e-07	1.13053e-06	6.89217e-07	1.71771e-06	4.22902e-07	1.74412e-06	1.42472e-06	1.08178e-06
Trueperaceae	3.45316e-05	3.94936e-05	4.43232e-05	3.72807e-05	3.92261e-05	3.31917e-05	3.68471e-05	3.49661e-05	4.32847e-05	3.99585e-05	4.69126e-05	4.07704e-05	4.21152e-05	4.19248e-05	4.80786e-05	4.10054e-05	4.07722e-05	3.46581e-05	3.99867e-05	3.66324e-05	3.11334e-05	3.36433e-05	3.59906e-05	3.69716e-05
Trypetheliaceae	0	6.36131e-07	0	5.26076e-08	1.09765e-07	7.51256e-08	2.51529e-07	1.07047e-06	5.09876e-08	8.65972e-08	0	2.161e-07	1.66927e-07	6.17013e-07	1.13462e-07	7.34896e-08	0	0	1.25495e-07	2.32463e-07	0	2.7849e-07	0	2.13345e-07
Tsukamurellaceae	2.88047e-06	5.07363e-06	5.85022e-06	6.10382e-06	8.34258e-06	7.4686e-06	7.90184e-06	5.39147e-06	4.81139e-06	4.60665e-06	7.46098e-06	4.22318e-06	6.67207e-06	4.49523e-06	6.26944e-06	8.74326e-06	5.60827e-06	7.65503e-06	4.10495e-06	4.00991e-06	4.71843e-06	3.9698e-06	4.98233e-06	7.70624e-06
Tuberaceae	7.79972e-07	1.18496e-06	1.28275e-06	1.3093e-06	2.14875e-06	6.83628e-07	3.03429e-07	1.63211e-06	2.81403e-07	1.766e-06	1.4229e-06	2.64651e-06	2.01497e-06	3.7401e-06	8.09679e-07	1.92592e-06	1.57502e-06	3.20082e-06	2.03862e-06	4.43114e-06	1.11761e-06	5.38244e-06	2.94265e-06	1.34455e-06
Tubulinosematidae	0	0	0	4.74242e-07	0	4.04889e-07	0	0	0	0	0	0	0	0	0	0	0	0	0	0	6.15685e-07	0	0	0
Tulasnellaceae	8.63064e-07	7.43985e-07	9.20523e-08	8.2057e-07	6.85545e-07	2.05178e-07	9.56622e-07	6.30592e-07	1.22759e-07	7.91196e-07	5.63886e-07	6.20174e-07	2.63e-07	1.09314e-06	1.66885e-07	4.58499e-07	1.04038e-06	8.99971e-07	7.14845e-08	1.82052e-06	2.48587e-07	1.94047e-06	4.30143e-07	1.18114e-06
Umbilicariaceae	1.12054e-07	4.99455e-07	8.07936e-07	2.94213e-07	0	0	1.41162e-06	3.71419e-08	3.81145e-08	0	2.89869e-07	4.52159e-07	8.16074e-07	3.94968e-07	2.66168e-07	5.93286e-07	2.49729e-07	9.27417e-07	6.18879e-07	5.73196e-07	6.0444e-07	6.63116e-07	2.21939e-07	4.86104e-07
Unikaryonidae	0	0	0	0	1.80675e-07	0	0	6.63953e-08	0	0	0	0	0	8.18293e-08	0	8.05822e-07	3.52027e-07	0	0	0	0	2.01318e-07	3.82992e-07	0
Ustilaginaceae	1.59927e-06	1.61387e-06	5.18825e-07	2.25408e-06	2.8556e-06	1.56188e-06	2.24625e-06	3.69982e-06	3.81793e-06	5.01379e-06	2.58245e-06	5.57823e-06	2.66554e-06	1.34093e-05	1.83464e-06	2.64474e-06	4.91617e-06	6.5496e-06	5.08029e-06	1.05778e-05	2.47619e-06	1.96104e-05	8.42007e-06	3.10307e-06
Vallitaleaceae	5.54547e-07	1.81815e-06	1.93802e-06	2.69257e-06	1.43058e-06	2.80698e-06	1.63886e-06	7.35094e-07	1.85973e-06	2.46194e-06	1.06719e-06	2.29367e-06	1.97015e-06	2.26755e-06	1.48679e-06	1.54198e-06	2.30804e-06	3.33479e-06	1.98273e-06	2.07659e-06	3.84662e-06	3.57904e-06	2.55861e-06	1.865e-06
Valsaceae	3.89788e-06	3.92099e-06	8.13492e-06	2.98978e-06	8.52668e-06	6.81178e-06	4.27646e-06	2.05696e-05	2.50721e-05	3.62151e-05	1.37913e-05	4.35178e-05	2.04821e-05	9.03478e-05	1.98304e-05	2.58192e-05	3.70528e-05	4.952e-05	5.4826e-05	8.16643e-05	1.96775e-05	0.000143429	9.52431e-05	3.12707e-05
Veillonellaceae	1.45581e-05	1.8572e-05	1.60214e-05	1.74878e-05	1.54632e-05	1.80889e-05	1.65762e-05	1.7402e-05	1.54756e-05	1.60824e-05	1.43518e-05	1.38965e-05	1.8915e-05	1.68286e-05	1.62356e-05	1.58815e-05	1.37955e-05	7.66512e-06	1.11689e-05	1.05532e-05	1.64059e-05	9.35409e-06	9.97732e-06	1.58147e-05
Ventosimonadaceae	1.26018e-06	5.8795e-07	6.70282e-07	1.18564e-07	6.91795e-07	3.94235e-07	2.87677e-07	1.69252e-07	2.61972e-07	4.48259e-07	7.45023e-07	3.09736e-07	5.34663e-08	1.2498e-06	6.82538e-07	9.2034e-07	1.71581e-06	5.37313e-07	3.97907e-07	8.65717e-07	1.15806e-06	1.4718e-06	1.5513e-06	1.22085e-06
Venturiaceae	0	8.96367e-08	9.60273e-07	8.7294e-08	8.61444e-08	2.89423e-07	0	5.5588e-07	2.53817e-07	3.74441e-07	1.54218e-07	3.98993e-07	0	9.80468e-07	2.36919e-07	5.52958e-07	5.07483e-07	5.87686e-07	4.45837e-07	1.83688e-06	0	3.40835e-07	6.86606e-07	1.05501e-07
Verrucariaceae	8.01327e-07	1.04477e-07	4.53382e-07	5.95153e-07	4.60014e-07	2.96845e-07	0	9.02163e-07	2.0395e-07	3.21237e-07	4.99112e-08	3.07789e-07	1.9412e-07	8.77408e-07	4.75929e-08	4.3485e-07	0	2.9308e-07	9.45773e-07	1.0827e-06	0	1.9918e-07	2.27055e-07	0
Verrucomicrobia_subdivision_3	0.00573389	0.00750569	0.00604021	0.00731923	0.00617973	0.00596482	0.00487532	0.0057684	0.00415171	0.00441082	0.00432974	0.00427266	0.0047519	0.00450627	0.004757	0.00594192	0.00401915	0.00378984	0.00374695	0.00344263	0.00310038	0.00233447	0.00249128	0.00289403
Verrucomicrobia_subdivision_6	2.12661e-06	3.02676e-06	1.87685e-06	2.18802e-06	1.7427e-06	1.61131e-06	2.47183e-06	2.97707e-06	1.07738e-06	1.55808e-06	7.76802e-07	2.28961e-06	1.34873e-06	1.12801e-06	1.22747e-06	9.69879e-07	0	4.61901e-07	8.73141e-07	1.10729e-06	2.34328e-07	3.45273e-07	8.95782e-07	1.27241e-06
Verrucomicrobiaceae	0.000724679	0.000809539	0.000919502	0.000923874	0.00086928	0.000792782	0.00079225	0.00081769	0.0009336	0.000938568	0.00100208	0.000979048	0.000850082	0.000755927	0.000919175	0.000922778	0.000989231	0.00102424	0.000971314	0.000916674	0.000828557	0.000741044	0.000732105	0.000842996
Vibrionaceae	0.00011543	9.64799e-05	0.000154494	0.000104328	0.000146912	0.000114035	0.000101082	0.000215568	0.000311614	0.000408145	0.000173201	0.000453105	0.000300946	0.000762497	0.000246258	0.000284849	0.00041949	0.000526971	0.000599722	0.000841929	0.000258351	0.00125989	0.0008318	0.000366538
Vicinamibacteraceae	0.00672292	0.00502994	0.00598563	0.00605308	0.00511554	0.00495784	0.00515551	0.00481785	0.00645996	0.00624705	0.00686635	0.00638499	0.00579867	0.00472602	0.00603544	0.00542358	0.00840588	0.00850052	0.00794828	0.00748908	0.00758782	0.0062531	0.0060965	0.00690115
Victivallaceae	2.25152e-06	3.20458e-06	3.08365e-06	4.14308e-06	2.58873e-06	2.28483e-06	2.04953e-06	2.21488e-06	2.79882e-06	2.61267e-06	2.90638e-06	3.94066e-06	1.9524e-06	1.59216e-06	2.66472e-06	1.93629e-06	1.11941e-06	4.72964e-07	1.16727e-06	1.502e-06	3.19359e-06	3.48232e-07	8.88157e-07	2.25609e-06
Violaceomycetaceae	0	0	0	0	0	0	0	0	0	4.39085e-07	0	0	0	0	2.69495e-07	0	0	0	0	0	0	2.08867e-07	0	0
Vulgatibacteraceae	4.3983e-05	6.37746e-05	4.88388e-05	5.82759e-05	6.97332e-05	5.7997e-05	6.60183e-05	6.03059e-05	3.7378e-05	3.73917e-05	3.26534e-05	3.83993e-05	6.47263e-05	5.84245e-05	6.84255e-05	6.26138e-05	3.2284e-05	2.69615e-05	3.18637e-05	2.94448e-05	3.26316e-05	2.38577e-05	3.11986e-05	3.13089e-05
Waddliaceae	9.66193e-07	1.61856e-06	1.00602e-06	1.36728e-06	1.16883e-06	1.45756e-06	1.5289e-07	2.04782e-06	1.46528e-06	3.23874e-06	3.21365e-06	9.39978e-07	1.84943e-06	2.41982e-06	1.84447e-06	2.90515e-06	1.34404e-06	8.92945e-07	1.54927e-06	2.73584e-07	9.02499e-07	1.05016e-06	3.50892e-07	1.99296e-06
Wallemiaceae	2.55808e-06	1.95014e-06	1.58939e-06	2.03615e-06	3.25833e-06	2.62383e-06	2.18214e-06	2.61102e-06	1.7861e-06	3.26307e-06	2.12295e-06	2.60077e-06	2.45414e-06	3.76075e-06	1.93237e-06	2.1806e-06	8.21533e-07	2.34702e-06	1.73691e-06	2.5056e-06	1.12793e-06	2.04594e-06	1.12276e-06	9.51583e-07
Weeksellaceae	0.00010281	0.000115163	0.000123582	0.000114288	0.000109792	0.000124435	0.00341052	0.000102898	0.000118648	0.000118476	0.000115287	0.000116628	0.00011746	0.000109846	0.000132489	0.000117085	0.000147845	0.000157606	0.000139402	0.00012559	0.000197619	0.000112544	0.000109667	0.00012457
Wenzhouxiangellaceae	6.38604e-05	5.47524e-05	5.61185e-05	7.01696e-05	4.96072e-05	4.2386e-05	7.05192e-05	5.77934e-05	6.7792e-05	6.53978e-05	7.70926e-05	6.44765e-05	5.607e-05	5.68291e-05	6.23917e-05	6.81016e-05	6.85928e-05	7.017e-05	6.62148e-05	5.35026e-05	5.42622e-05	5.07429e-05	5.05181e-05	6.11943e-05
Williamwhitmaniaceae	1.1067e-06	1.10504e-06	1.72174e-06	2.53533e-06	1.80553e-06	1.10256e-06	1.61815e-06	8.19639e-07	1.13277e-06	9.79283e-07	1.55335e-06	1.61914e-06	1.39877e-06	1.02037e-06	6.76945e-07	1.43899e-06	9.16536e-07	9.05678e-07	1.33634e-06	9.4784e-07	2.83948e-06	1.22537e-06	1.50575e-06	6.1848e-07
Woeseiaceae	0.000108822	8.27598e-05	0.000112663	0.00010618	8.15969e-05	8.07758e-05	0.00011506	9.69324e-05	0.000132145	0.000115792	0.000121469	0.000112953	0.000114212	9.31948e-05	0.000114298	0.000118834	0.000124413	0.000129126	0.00011711	0.000116575	0.000113729	9.21285e-05	9.27859e-05	0.000108142
Xanthobacteraceae	0.00269159	0.0037332	0.00259792	0.00250128	0.0023283	0.00253628	0.00232613	0.00253873	0.00280275	0.00308121	0.00248752	0.00262905	0.00408043	0.00366595	0.00336917	0.00344063	0.00306901	0.00317121	0.0031765	0.00273638	0.00160559	0.00140222	0.00170489	0.00190991
Xanthomonadaceae	0.00309221	0.00273978	0.00651688	0.00348779	0.00356325	0.00295492	0.00334332	0.00342174	0.00401422	0.00373326	0.00402657	0.00421735	0.00411515	0.00544514	0.00605087	0.00407177	0.00512598	0.00643026	0.00631661	0.00528085	0.00483822	0.00527206	0.00489239	0.00582503
Xenococcaceae	3.90691e-06	4.89265e-06	4.3252e-06	5.13033e-06	4.42962e-06	4.74048e-06	2.72396e-06	3.48773e-06	4.16336e-06	6.02855e-06	7.34929e-06	6.98398e-06	4.78772e-06	4.44828e-06	4.72485e-06	4.62764e-06	4.22636e-06	3.53903e-06	4.00653e-06	5.74944e-06	5.13558e-06	4.15611e-06	6.03546e-06	6.61855e-06
Xylanivirgaceae	0	4.88411e-07	1.01793e-07	9.75107e-07	6.1748e-07	6.85935e-07	5.50689e-07	3.06581e-07	0	5.63954e-07	0	3.1766e-07	0	1.01323e-06	1.46664e-07	9.2352e-08	0	1.4283e-07	0	0	0	1.70504e-07	5.69448e-07	1.26323e-07
Xylariaceae	9.85948e-07	4.67874e-07	1.39526e-06	1.13173e-06	7.9892e-07	5.22313e-07	9.28774e-07	1.34012e-06	1.16987e-06	2.18823e-06	3.12948e-06	1.38615e-06	1.41651e-06	2.64006e-06	9.95399e-07	2.23836e-06	2.22968e-06	1.43235e-06	2.76192e-06	2.56854e-06	8.82668e-07	2.60131e-06	2.40545e-06	1.48412e-06
Yersiniaceae	3.08905e-05	4.20903e-05	3.72716e-05	3.52124e-05	3.7111e-05	3.30782e-05	4.06233e-05	3.81656e-05	3.48725e-05	3.01388e-05	2.79858e-05	3.27563e-05	2.99095e-05	4.47461e-05	3.27001e-05	2.73955e-05	3.01093e-05	3.81526e-05	3.16048e-05	3.75007e-05	3.13434e-05	4.22758e-05	3.89004e-05	3.33539e-05
Zhaonellaceae	2.29999e-05	1.49971e-05	4.5179e-05	8.10679e-06	5.26992e-05	2.77309e-05	8.69493e-06	0.00010767	0.000143892	0.000239882	6.80425e-05	0.000290582	0.000160881	0.000572401	0.000119975	0.000150944	0.000250653	0.000320386	0.00038031	0.000590921	0.000134872	0.000920786	0.000599808	0.000227606
Zoogloeaceae	0.000529563	0.0005008	0.000580426	0.000539255	0.000494656	0.000493264	0.000487394	0.000472282	0.000518845	0.000478766	0.000520779	0.000490781	0.000464693	0.000394917	0.000452722	0.000447439	0.000508333	0.000557799	0.000530404	0.000489243	0.000492002	0.000423992	0.000511451	0.000575063
Zopfiaceae	3.36233e-07	1.1339e-06	8.49263e-07	8.08386e-07	6.66758e-07	9.35498e-07	5.45819e-07	1.57617e-06	5.08548e-07	2.25906e-07	1.27498e-06	4.09224e-07	2.66729e-07	5.60087e-07	1.06305e-06	2.06973e-07	6.01475e-07	8.66709e-07	0	1.45605e-06	1.10849e-06	0	2.72149e-07	1.42653e-06
unclassified	0.604086	0.564763	0.560587	0.580315	0.545395	0.545811	0.536166	0.510318	0.546734	0.560209	0.59634	0.563707	0.567426	0.499877	0.576805	0.565476	0.573884	0.542615	0.555733	0.511421	0.568422	0.470594	0.499222	0.550472
