# Supplementary material
Source: MDPI journal article supplement (https://www.mdpi.com/2073-4395/14/3/635)
Supplement: s1 [file s1 › Table S8.xlsx]

## Sheet: Sheet1
Table S8.	Relative species abundance of 24 samples at the genus level
genus	AIP1	AIP2	AIP3	AIP4	AMP1	AMP2	AMP3	AMP4	BIP1	BIP2	BIP3	BIP4	BMP1	BMP2	BMP3	BMP4	CIP1	CIP2	CIP3	CIP4	CMP1	CMP2	CMP3	CMP4
Aaosphaeria	1.4974e-07	4.85553e-07	4.34077e-07	8.7294e-08	2.99906e-07	2.1758e-07	4.13961e-07	1.29736e-06	1.84779e-07	7.02294e-07	3.38574e-07	9.6828e-07	1.93368e-07	4.91076e-07	6.56939e-07	5.83665e-08	3.95152e-07	4.6986e-07	9.79029e-07	9.05609e-07	7.46371e-07	1.47857e-06	7.71238e-07	2.46168e-07
Aarhusvirus	0	0	1.93668e-07	0	0	0	0	0	0	0	0	0	0	2.64617e-07	0	0	0	0	0	0	0	0	0	0
Abditibacterium	2.26004e-05	2.69406e-05	2.91604e-05	3.37977e-05	3.91308e-05	3.41317e-05	3.88391e-05	2.59602e-05	2.28656e-05	2.46291e-05	2.54395e-05	2.423e-05	2.60124e-05	2.14731e-05	2.58134e-05	2.72463e-05	1.87773e-05	2.13817e-05	1.85146e-05	2.23879e-05	2.37734e-05	2.00087e-05	1.96391e-05	1.93745e-05
Abidjanvirus	7.23333e-07	6.76646e-07	3.05299e-06	1.34983e-06	4.50676e-07	3.33824e-07	1.19698e-06	4.95787e-07	3.3165e-07	2.51615e-07	3.18448e-07	3.80129e-07	5.47195e-08	6.75805e-08	1.19096e-07	5.25703e-07	8.01598e-08	7.42951e-07	9.29592e-08	1.72195e-07	0	1.71907e-07	2.49339e-07	1.35219e-07
Abiotrophia	0	1.85481e-07	0	0	1.9444e-07	7.35044e-08	0	2.57877e-07	2.19975e-07	2.92266e-07	0	0	0	1.78787e-07	0	0	0	0	0	0	0	0	0	0
Absicoccus	0	0	0	0	0	0	0	0	0	0	0	0	0	0	0	3.12678e-07	0	0	0	0	0	0	0	0
Absidia	1.02355e-06	1.28395e-06	2.70275e-06	5.97447e-07	2.333e-06	7.56945e-07	9.01919e-07	4.75315e-06	8.86908e-06	1.02856e-05	4.36315e-06	1.15363e-05	5.9642e-06	2.26395e-05	5.85099e-06	5.14535e-06	1.08232e-05	1.12644e-05	1.85495e-05	2.45346e-05	8.62771e-06	3.77534e-05	2.14778e-05	7.79173e-06
Absiella	0	0	0	0	0	0	0	0	3.44737e-07	0	1.12487e-07	0	0	0	2.14523e-07	0	0	5.05235e-07	3.37151e-07	3.12264e-07	0	2.49394e-07	2.58377e-07	5.73167e-07
Abyssibacter	5.508e-06	3.82575e-06	4.03522e-06	3.89207e-06	4.34669e-06	4.79754e-06	3.53901e-06	3.85207e-06	8.25524e-06	5.85108e-06	8.50191e-06	9.39994e-06	7.93568e-06	2.79036e-06	8.92491e-06	3.05792e-06	8.65043e-06	7.5506e-06	9.63612e-06	8.80857e-06	3.87845e-06	2.35076e-06	3.25884e-06	5.11421e-06
Abyssicoccus	0	0	0	0	0	0	0	0	0	0	0	0	0	0	0	4.6768e-07	0	0	0	0	0	0	0	0
Abyssisolibacter	4.43946e-07	6.90288e-07	1.0795e-06	9.25652e-07	9.13266e-07	5.39032e-07	1.06113e-06	6.41254e-08	4.21011e-07	2.29031e-07	7.05216e-07	1.17028e-06	3.84859e-07	2.79752e-07	5.77485e-07	5.87747e-07	1.24541e-06	2.01279e-06	7.94127e-07	1.29255e-06	1.49504e-06	8.36923e-07	6.96244e-07	1.06125e-06
Acaricomes	2.02905e-07	7.96418e-07	1.15033e-06	9.80711e-08	8.66716e-07	7.21938e-07	2.37797e-07	7.55666e-07	3.88191e-07	1.0076e-07	5.86661e-07	1.72241e-07	4.56005e-07	0	3.54891e-07	2.83495e-07	1.05863e-07	2.18706e-08	0	0	4.09741e-07	1.03144e-07	4.38075e-07	0
Acaromyces	0	4.0245e-07	8.77204e-08	2.93838e-07	2.95332e-07	1.77703e-07	2.18805e-07	1.43546e-07	1.92599e-07	5.50533e-07	1.73255e-07	4.10158e-07	1.8761e-07	4.86595e-07	0	0	0	8.31832e-07	3.95576e-07	3.77421e-07	0	1.25862e-06	1.10969e-07	0
Acaryochloris	2.29939e-05	2.33859e-05	2.55355e-05	2.48316e-05	2.40313e-05	2.07065e-05	2.22866e-05	2.40451e-05	2.50872e-05	2.48834e-05	2.52991e-05	2.51375e-05	2.63585e-05	2.47248e-05	2.90188e-05	2.23905e-05	2.79565e-05	2.95233e-05	2.3172e-05	1.66356e-05	2.77581e-05	1.57194e-05	2.18392e-05	2.53009e-05
Acetanaerobacterium	3.84184e-07	0	3.28952e-07	1.74588e-07	0	1.00233e-07	0	0	0	0	0	0	0	7.46356e-08	7.19351e-07	4.11032e-07	4.189e-07	2.42657e-07	4.85787e-07	2.24964e-07	1.14608e-07	0	0	1.03232e-07
Acetatifactor	2.30005e-07	0	9.81084e-08	3.26456e-07	2.68635e-07	0	1.13006e-07	3.94877e-07	2.12886e-07	5.33554e-07	9.26496e-07	0	2.76477e-07	2.68099e-07	0	0	7.09297e-07	0	2.97225e-07	1.37643e-07	0	2.1986e-07	0	1.26323e-07
Acetitomaculum	0	0	0	1.74588e-07	1.49569e-07	3.39251e-07	3.52582e-07	2.47341e-07	1.69212e-07	2.56937e-07	0	7.66569e-08	0	7.46356e-08	4.42062e-07	3.20695e-07	1.07027e-07	2.70535e-07	0	1.14954e-07	1.93952e-07	9.18098e-08	9.51167e-08	4.19806e-07
Acetivibrio	8.40402e-08	3.79232e-07	7.16946e-08	3.17411e-07	5.5403e-07	4.45267e-07	2.999e-07	3.60705e-07	1.4806e-07	4.73556e-07	7.24673e-08	6.70748e-08	4.71429e-07	6.53061e-08	0	0	0	0	0	0	0	0	0	0
Acetoanaerobium	0	1.74797e-07	0	2.92171e-07	3.88881e-07	1.71028e-07	6.13969e-08	3.10104e-07	6.06231e-08	2.0787e-07	3.41966e-07	2.29322e-07	7.71213e-07	3.20874e-07	6.96292e-07	4.41437e-07	1.39135e-07	4.57442e-07	0	0	1.26069e-07	7.23254e-07	1.36309e-07	0
Acetobacter	4.12685e-05	4.45298e-05	6.6592e-05	3.02302e-05	6.2539e-05	4.67608e-05	3.49498e-05	8.26931e-05	9.84611e-05	0.000152507	5.77467e-05	0.000160252	0.00010619	0.000280626	7.61383e-05	9.94209e-05	0.000139892	0.000200503	0.000206349	0.000293447	8.41585e-05	0.000467359	0.00030285	0.000130033
Acetobacterium	4.3376e-07	8.39522e-07	1.42011e-06	4.52088e-07	1.11205e-06	2.03053e-06	8.30261e-07	2.79056e-07	2.49909e-06	1.37844e-06	3.95319e-07	1.56036e-06	1.37475e-06	1.71343e-06	1.60004e-06	1.51856e-06	1.34872e-06	1.10526e-06	1.41558e-06	1.10506e-06	1.59199e-06	1.60165e-06	1.02426e-06	2.30508e-06
Acetobacteroides	9.5159e-07	4.93729e-07	3.55623e-08	1.01038e-06	3.81561e-07	1.96639e-06	7.65167e-07	1.3919e-06	5.82263e-07	7.41044e-07	5.10976e-07	2.7089e-07	8.48519e-07	9.43652e-07	1.01918e-06	8.0482e-07	1.03435e-06	1.47217e-06	5.25328e-07	0	2.44646e-06	2.13185e-07	7.9754e-07	1.51565e-06
Acetohalobium	2.7694e-07	5.59081e-07	4.06288e-07	2.05442e-07	3.9457e-07	8.84735e-07	1.34438e-07	2.64749e-07	5.2168e-07	6.44239e-07	2.76986e-07	4.28337e-07	1.50099e-07	2.94853e-07	9.22144e-07	8.19287e-07	1.47468e-07	9.72722e-08	0	0	1.17233e-07	1.22863e-07	4.82143e-07	3.7573e-07
Acetomicrobium	4.02872e-06	3.29878e-06	2.0045e-06	2.93549e-06	2.18037e-06	1.93721e-06	3.25103e-06	2.16546e-06	1.93027e-06	1.6743e-06	3.08256e-06	3.18878e-06	1.89187e-06	1.74752e-06	1.80592e-06	1.86777e-06	2.76304e-06	2.83792e-06	2.36219e-06	1.54742e-06	1.58688e-06	8.44642e-07	1.8038e-06	2.8322e-06
Acetonema	1.70812e-06	3.34935e-06	3.27194e-06	3.13135e-06	2.81303e-06	2.81652e-06	3.80495e-06	3.26845e-06	2.30012e-06	3.27484e-06	2.53707e-06	2.79105e-06	3.15671e-06	1.47686e-06	2.65976e-06	2.19669e-06	2.7865e-06	2.39375e-06	6.65828e-07	2.34209e-06	2.58885e-06	2.19216e-06	3.57244e-06	3.35351e-06
Acholeplasma	1.82864e-07	1.06267e-07	3.61802e-07	2.67767e-07	2.57138e-07	0	5.09147e-07	0	2.2209e-07	3.71509e-07	1.06149e-07	4.78228e-08	4.66939e-07	2.86979e-07	0	6.02194e-07	1.08216e-07	5.93872e-07	0	0	0	2.63832e-07	3.81865e-07	2.13345e-07
Achromatium	3.14993e-06	2.08012e-06	4.39729e-06	3.27763e-06	2.46428e-06	4.30182e-06	2.48647e-06	3.33133e-06	2.51184e-06	2.37891e-06	3.63364e-06	3.69505e-06	2.44284e-06	2.41062e-06	3.76369e-06	2.75186e-06	3.15304e-06	3.57581e-06	1.4314e-06	3.51348e-06	2.63677e-06	1.58495e-06	2.85426e-06	1.66133e-06
Achromobacter	0.000203348	0.000195283	0.000210169	0.000180615	0.000176922	0.000175819	0.000187874	0.000240708	0.000218274	0.000154626	0.000180336	0.000169927	0.000157505	0.000137743	0.000157736	0.000145341	0.000163476	0.000177475	0.000155557	0.00017857	0.000182136	0.000146103	0.000165326	0.000220655
Acidaminobacter	1.32636e-06	1.9956e-06	5.5437e-07	1.4079e-06	1.33809e-06	1.49797e-06	1.17862e-06	1.93453e-06	8.55752e-07	2.03932e-06	1.06864e-06	2.03722e-06	1.39044e-06	1.00024e-06	2.23011e-06	1.24833e-06	1.9415e-06	3.09915e-06	1.34355e-06	4.81228e-07	8.79757e-07	1.06107e-06	6.9712e-07	6.10027e-07
Acidaminococcus	4.84967e-07	1.67087e-06	8.4874e-07	1.26936e-06	3.54125e-07	1.57673e-06	2.10741e-07	1.41996e-06	2.53073e-06	1.21719e-06	4.70998e-07	5.39998e-07	1.51174e-06	9.51614e-07	8.70568e-07	5.97401e-07	1.01196e-06	1.00354e-06	6.79441e-07	3.93347e-07	1.0408e-06	6.24236e-07	2.06908e-07	1.01947e-06
Acidianus	4.07166e-07	4.78062e-08	1.47163e-07	1.96693e-07	3.91349e-07	1.01552e-07	0	1.48079e-07	2.79968e-07	4.75586e-07	6.18121e-07	2.33138e-07	2.12759e-07	1.98993e-07	2.6989e-07	3.8399e-07	3.15327e-07	2.55381e-07	2.73001e-07	0	1.16116e-07	1.47636e-07	0	0
Acidibacillus	3.54812e-06	3.3801e-06	4.35096e-06	2.87275e-06	4.24137e-06	3.90762e-06	2.8353e-06	4.17381e-06	1.79318e-06	3.18866e-06	3.57278e-06	3.08748e-06	3.80926e-06	2.16326e-06	2.90658e-06	4.03414e-06	3.74592e-06	1.78551e-06	2.41905e-06	2.96243e-06	2.87662e-06	2.99572e-06	4.2023e-06	2.42236e-06
Acidibrevibacterium	9.4764e-06	1.51902e-05	1.1149e-05	1.4071e-05	1.12911e-05	1.67198e-05	1.20527e-05	1.43777e-05	7.06589e-06	9.43884e-06	1.10846e-05	9.27977e-06	1.28398e-05	8.55903e-06	1.22177e-05	1.24882e-05	6.64905e-06	5.71958e-06	1.04658e-05	8.40354e-06	7.56433e-06	5.31476e-06	7.68398e-06	7.17679e-06
Acidicaldus	8.5308e-06	1.16893e-05	8.01348e-06	8.47072e-06	1.04136e-05	8.35957e-06	9.123e-06	1.20137e-05	5.6534e-06	4.85432e-06	8.3782e-06	7.82577e-06	7.57947e-06	9.74673e-06	9.54135e-06	1.18152e-05	8.34013e-06	4.43859e-06	6.046e-06	7.02393e-06	6.06565e-06	5.09305e-06	4.03217e-06	5.80282e-06
Acidiferrimicrobium	8.37185e-05	8.05677e-05	7.26369e-05	8.0897e-05	0.000118361	0.00012359	0.000118099	0.000117336	9.5415e-05	9.33089e-05	9.44702e-05	9.71654e-05	9.49221e-05	9.5406e-05	0.000100699	9.37531e-05	0.00016705	0.00014651	0.000182283	0.000138682	8.09967e-05	6.94988e-05	7.12881e-05	8.39962e-05
Acidiferrobacter	7.256e-06	7.58566e-06	7.37884e-06	6.9982e-06	9.07356e-06	8.32367e-06	1.03546e-05	1.47537e-05	5.82371e-06	6.37665e-06	5.09028e-06	5.95444e-06	8.91019e-06	7.07177e-06	5.76777e-06	6.32805e-06	2.93755e-06	7.30983e-06	4.07173e-06	5.52478e-06	4.63896e-06	6.14751e-06	6.18036e-06	5.24511e-06
Acidihalobacter	2.03271e-05	1.97103e-05	1.95521e-05	2.02697e-05	2.04481e-05	1.9374e-05	1.8671e-05	2.38237e-05	1.96215e-05	1.58642e-05	2.30058e-05	1.75729e-05	1.88449e-05	1.98369e-05	1.75949e-05	2.08136e-05	1.45106e-05	1.82239e-05	1.01156e-05	1.30466e-05	1.097e-05	1.16293e-05	1.40575e-05	1.37646e-05
Acidilobus	3.35535e-07	4.72756e-07	0	3.97188e-07	0	1.35403e-07	3.02663e-07	9.37834e-08	2.88717e-07	5.43818e-07	2.24973e-07	1.82756e-07	8.75511e-08	9.30388e-08	4.92228e-07	2.99828e-07	3.0339e-07	8.81619e-07	4.64159e-07	0	1.20888e-07	2.28896e-07	8.29497e-07	0
Acidimangrovimonas	2.33047e-06	3.39583e-06	3.09208e-06	3.2525e-06	2.94479e-06	2.53241e-06	3.89004e-06	5.07807e-06	3.40837e-06	4.78098e-06	2.72727e-06	4.46386e-06	2.84685e-06	3.86222e-06	1.91985e-06	3.5741e-06	1.80104e-06	5.22636e-06	3.34424e-06	4.31167e-06	1.87669e-06	1.96095e-06	2.99384e-06	2.85307e-06
Acidimicrobium	1.17795e-05	7.86853e-06	8.23564e-06	1.15761e-05	7.98467e-06	9.49066e-06	9.87226e-06	9.67595e-06	9.63524e-06	1.30434e-05	1.12415e-05	1.36132e-05	7.6359e-06	1.05088e-05	1.20141e-05	8.69367e-06	1.59785e-05	1.42291e-05	1.5754e-05	1.45776e-05	1.18938e-05	7.4714e-06	8.05019e-06	9.14251e-06
Acidiphilium	2.08398e-05	3.11021e-05	2.48989e-05	2.09554e-05	2.64796e-05	2.77175e-05	3.19869e-05	3.16494e-05	1.56936e-05	1.87193e-05	2.08682e-05	1.37939e-05	2.12229e-05	1.97259e-05	1.5832e-05	2.04486e-05	2.10865e-05	1.41155e-05	2.09194e-05	1.5418e-05	1.79298e-05	1.38299e-05	1.57513e-05	2.25018e-05
Acidipila	0.000383215	0.000555698	0.000396287	0.000411986	0.00055227	0.000555245	0.000557302	0.000618058	0.000208951	0.000227579	0.000207054	0.000224144	0.00032358	0.000330615	0.000276125	0.000372295	0.000171572	0.000155688	0.000169271	0.000160368	0.000196519	0.000159058	0.000163992	0.000189042
Acidipropionibacterium	1.64542e-06	2.2008e-06	1.09562e-06	2.8471e-06	2.9032e-06	2.48967e-06	4.18012e-06	1.56889e-06	2.64183e-06	2.56926e-06	1.91647e-06	2.48372e-06	1.13708e-06	1.05028e-06	2.44598e-06	2.72223e-06	3.57753e-07	2.39219e-06	5.95756e-07	1.52587e-06	2.73753e-06	1.71126e-06	8.69502e-07	2.2831e-06
Acidisarcina	7.29117e-05	0.000114332	8.16155e-05	8.28072e-05	0.000112689	0.000108013	0.000116	0.000143733	4.49452e-05	4.46705e-05	3.96542e-05	4.08321e-05	6.45573e-05	6.58958e-05	5.81585e-05	6.75267e-05	3.17876e-05	4.07636e-05	3.06817e-05	3.68326e-05	2.96371e-05	2.69871e-05	3.09594e-05	3.52074e-05
Acidisoma	6.35708e-06	9.73758e-06	9.57273e-06	9.7206e-06	1.20509e-05	9.67097e-06	9.73387e-06	1.73171e-05	6.08727e-06	4.74503e-06	7.22817e-06	5.51803e-06	6.98282e-06	6.97641e-06	5.38785e-06	7.392e-06	7.46594e-06	5.65093e-06	5.28799e-06	5.28372e-06	8.42712e-06	4.93331e-06	4.76893e-06	6.22454e-06
Acidisphaera	0.000101243	0.000133584	0.000105378	0.000107035	0.000108968	0.000102074	0.00012117	0.000130905	7.44564e-05	7.73402e-05	7.89626e-05	7.02302e-05	0.000102981	9.84141e-05	9.23583e-05	0.000103718	7.50693e-05	7.1554e-05	7.47901e-05	6.45631e-05	6.52653e-05	5.98126e-05	6.78123e-05	7.07906e-05
Acidithiobacillus	3.33788e-05	3.39603e-05	3.02552e-05	3.41579e-05	3.59389e-05	3.67379e-05	3.46723e-05	3.94399e-05	3.17202e-05	2.86574e-05	3.46431e-05	3.04667e-05	3.04868e-05	2.98415e-05	3.07107e-05	2.68802e-05	2.80922e-05	2.91947e-05	3.82663e-05	2.90772e-05	2.80373e-05	2.12229e-05	2.76628e-05	2.43006e-05
Acidithrix	6.75574e-06	8.53693e-06	8.25155e-06	7.55034e-06	1.66726e-05	1.28802e-05	1.16222e-05	1.20363e-05	1.11211e-05	1.04513e-05	8.34217e-06	1.01836e-05	1.14306e-05	7.43975e-06	8.00668e-06	6.5122e-06	1.36403e-05	1.62631e-05	1.61961e-05	1.16948e-05	7.21875e-06	7.88137e-06	5.55708e-06	9.00409e-06
Acidobacterium	0.00118058	0.00103805	0.00136686	0.00112914	0.000956961	0.00105733	0.00094938	0.00102954	0.00127579	0.00132029	0.00130794	0.00120432	0.00108543	0.000811147	0.00120732	0.00106244	0.00155752	0.00162766	0.00183426	0.001502	0.00128333	0.00109744	0.0010463	0.00128697
Acidocella	2.16289e-05	2.88438e-05	2.23828e-05	2.29442e-05	2.83474e-05	2.86774e-05	2.67544e-05	3.65362e-05	2.2905e-05	1.79894e-05	1.97687e-05	1.84383e-05	2.36038e-05	2.13349e-05	1.73823e-05	2.22525e-05	2.37865e-05	2.46538e-05	1.57934e-05	1.80643e-05	1.77554e-05	1.62569e-05	1.98964e-05	1.81507e-05
Acidomonas	3.79337e-06	3.64515e-06	1.86541e-06	2.75146e-06	3.20527e-06	2.64756e-06	4.3159e-06	2.37575e-06	1.48405e-06	2.22975e-06	1.89138e-06	2.05744e-06	2.26204e-06	2.36227e-06	1.96617e-06	2.38313e-06	1.89503e-06	2.75086e-06	3.42068e-06	1.4118e-06	1.80741e-06	2.95928e-06	1.40718e-06	1.60728e-06
Acidomyces	0	1.74903e-07	0	1.0098e-06	0	0	0	6.35819e-08	1.05468e-07	1.06764e-07	5.21941e-07	2.38896e-07	4.79732e-08	4.43996e-07	1.07207e-07	3.9977e-07	1.41151e-07	0	0	8.68663e-07	1.27896e-07	7.26495e-07	6.18258e-07	6.57572e-08
Acidothermus	4.04894e-05	7.6432e-05	4.76035e-05	7.02692e-05	0.000151801	0.000157981	0.000170967	0.000157807	3.85283e-05	4.47608e-05	3.19084e-05	3.39094e-05	4.12932e-05	6.25566e-05	4.75915e-05	4.95871e-05	2.62668e-05	2.77948e-05	2.48138e-05	2.24783e-05	2.81396e-05	2.58982e-05	2.50458e-05	2.48077e-05
Acidovorax	0.000359772	0.00036675	0.00033976	0.00029781	0.000282408	0.000305124	0.000282189	0.00032345	0.000668319	0.000261658	0.000294487	0.000284943	0.000254122	0.000221255	0.000255632	0.000240176	0.000314285	0.000373187	0.000348862	0.000334492	0.000298525	0.000247477	0.000267068	0.000315838
Aciduliprofundum	2.21337e-06	1.30225e-06	2.031e-06	1.36326e-06	2.21802e-06	1.72973e-06	1.78661e-06	1.58162e-06	2.51508e-06	3.31067e-06	3.88881e-06	1.41797e-06	2.57963e-06	2.15893e-06	2.67965e-06	2.15977e-06	1.91738e-06	2.45339e-06	1.62721e-06	9.82208e-07	1.6805e-06	2.43458e-06	2.01293e-06	1.94155e-06
Acinetobacter	0.000150783	0.000185146	0.000302139	6.0398e-05	0.000292466	0.000120318	7.20749e-05	0.000316892	0.000479309	0.000717336	0.000208306	0.000741176	0.000411822	0.00139906	0.000323065	0.000395733	0.000727142	0.00114323	0.00102241	0.00146072	0.000419282	0.00228347	0.00152508	0.000585193
Acionnavirus	0	0	0	0	0	0	0	0	0	0	0	0	0	0	0	2.87993e-07	0	0	0	0	0	0	0	0
Acremonium	2.36221e-07	2.95801e-07	2.83148e-07	0	0	0	7.81492e-07	0	0	3.15963e-07	5.63766e-07	2.61592e-07	1.75102e-07	0	2.69495e-07	3.01199e-07	0	4.63708e-07	0	0	0	0	0	0
Acrocarpospora	6.97629e-05	7.26304e-05	7.00109e-05	7.06446e-05	7.68269e-05	7.97517e-05	7.15511e-05	8.18577e-05	7.30181e-05	7.33143e-05	9.13214e-05	7.19681e-05	6.95591e-05	6.2166e-05	6.83295e-05	7.43594e-05	6.38527e-05	7.80441e-05	5.02333e-05	6.18973e-05	7.13453e-05	5.37501e-05	7.26297e-05	6.24008e-05
Actibacterium	2.8005e-06	2.56726e-06	3.1457e-06	4.25947e-06	3.19034e-06	1.79568e-06	1.69771e-06	2.38637e-06	2.63952e-06	2.1464e-06	3.16702e-06	2.64191e-06	2.67874e-06	3.86844e-06	3.01773e-06	3.54641e-06	2.26263e-06	3.32105e-06	2.24754e-06	2.71088e-06	2.2248e-06	2.52883e-06	1.43069e-06	3.05882e-06
Actinoallomurus	4.01423e-05	4.97872e-05	5.56528e-05	4.3665e-05	6.52525e-05	6.68832e-05	7.88744e-05	7.36756e-05	3.26408e-05	6.13827e-05	0.000243923	3.4973e-05	5.7741e-05	4.65865e-05	3.82819e-05	5.30069e-05	2.48517e-05	3.36398e-05	2.66254e-05	3.72045e-05	3.97415e-05	1.94806e-05	0.000482596	2.81677e-05
Actinoalloteichus	1.3624e-05	1.11531e-05	1.86184e-05	1.39302e-05	1.0625e-05	1.65011e-05	1.55707e-05	1.2967e-05	1.29153e-05	8.68615e-06	1.07308e-05	9.13233e-06	1.41934e-05	1.31953e-05	9.08279e-06	1.5304e-05	1.09907e-05	8.21329e-06	1.09952e-05	8.98374e-06	1.27819e-05	8.4808e-06	1.40547e-05	1.51003e-05
Actinobacillus	1.18107e-06	2.34531e-06	1.34716e-06	1.69292e-06	1.88567e-06	9.57623e-07	1.06117e-06	1.30746e-06	1.38864e-06	1.05068e-06	9.47336e-07	3.7515e-07	1.70296e-06	2.11659e-06	2.33529e-06	1.56944e-06	4.11079e-07	7.25028e-07	1.03501e-06	1.45289e-06	1.25948e-06	7.98763e-07	4.15919e-07	5.9877e-07
Actinobaculum	6.82088e-07	1.48643e-06	1.44149e-06	6.34942e-07	6.04677e-07	1.06331e-06	5.65309e-07	1.00442e-06	6.19077e-07	8.79544e-07	1.04976e-06	9.61002e-07	1.48927e-06	5.17672e-07	1.94583e-06	1.4286e-06	4.50656e-07	3.18745e-07	6.43696e-07	7.95452e-07	9.08282e-07	4.42289e-07	5.65087e-07	1.29737e-07
Actinocatenispora	2.4741e-05	2.38484e-05	3.55995e-05	2.09341e-05	2.69159e-05	2.84778e-05	2.80038e-05	4.07162e-05	1.238e-05	1.99304e-05	2.16225e-05	1.7651e-05	1.99106e-05	2.05891e-05	1.8549e-05	2.32806e-05	1.38255e-05	1.11776e-05	6.14958e-06	1.36947e-05	1.68747e-05	1.27238e-05	1.2884e-05	1.33514e-05
Actinocorallia	2.3205e-05	2.73355e-05	0.000125691	3.22638e-05	4.0433e-05	3.801e-05	4.45771e-05	4.10285e-05	2.73172e-05	2.42605e-05	3.30448e-05	2.71009e-05	2.19153e-05	2.7528e-05	2.23322e-05	2.44572e-05	2.28637e-05	2.78089e-05	2.63423e-05	2.14387e-05	2.19125e-05	2.10331e-05	2.63828e-05	2.61752e-05
Actinocrispum	3.7583e-05	3.52847e-05	5.22342e-05	5.18969e-05	4.0109e-05	5.74231e-05	6.13343e-05	4.23042e-05	8.4792e-05	0.000102057	4.42189e-05	0.000123316	0.000407172	4.23844e-05	3.74055e-05	0.00136263	1.95917e-05	2.83295e-05	1.7726e-05	2.28132e-05	1.94074e-05	1.65024e-05	2.58357e-05	2.38345e-05
Actinokineospora	3.48702e-05	4.03439e-05	7.32639e-05	5.30235e-05	4.85216e-05	4.79462e-05	5.36192e-05	5.01699e-05	4.30071e-05	4.01707e-05	4.88366e-05	4.34094e-05	4.30308e-05	3.87681e-05	3.8372e-05	5.98676e-05	3.47473e-05	3.62266e-05	3.46849e-05	2.96281e-05	2.63602e-05	2.60316e-05	3.31305e-05	2.89946e-05
Actinomadura	0.000449739	0.000543462	0.000609518	0.000539436	0.000747513	0.000809432	0.000818374	0.000794438	0.00177254	0.00116202	0.00110463	0.00114738	0.000552773	0.000583093	0.000542251	0.000588952	0.000443885	0.00044518	0.000413018	0.000355586	0.000431569	0.000324164	0.000519193	0.000399931
Actinomyces	4.40387e-05	3.91783e-05	4.22396e-05	4.62266e-05	5.53772e-05	5.44267e-05	5.85081e-05	5.72185e-05	5.68071e-05	5.88338e-05	5.29651e-05	5.70931e-05	4.96656e-05	4.61666e-05	4.76629e-05	4.38553e-05	6.33398e-05	6.87711e-05	7.13402e-05	7.02108e-05	4.64541e-05	3.73329e-05	4.03329e-05	5.03215e-05
Actinomycetospora	3.09329e-05	2.95294e-05	3.64823e-05	2.86617e-05	4.14335e-05	4.20435e-05	3.48726e-05	5.0277e-05	3.37241e-05	3.69693e-05	3.44012e-05	3.35649e-05	3.4892e-05	3.35772e-05	4.10062e-05	3.52335e-05	3.43824e-05	3.86398e-05	3.40892e-05	3.5535e-05	3.10798e-05	2.46991e-05	2.64152e-05	3.0055e-05
Actinophytocola	0.000114485	0.000115227	0.000167308	0.00014741	0.000162741	0.000145488	0.000255766	0.00015518	0.000149448	0.000133332	0.000150133	0.000157771	0.000137308	0.000131577	0.000121722	0.000212016	0.000146766	0.000149896	0.000171745	0.000153533	0.000117741	9.84321e-05	0.000124794	0.000124598
Actinoplanes	0.00118061	0.00159835	0.0013433	0.00212597	0.00126149	0.00357679	0.00196563	0.00497677	0.00126636	0.00139401	0.0018347	0.00112244	0.00183155	0.00145934	0.00160826	0.00116366	0.000861133	0.00237173	0.000741197	0.000918342	0.00203471	0.000884359	0.00398058	0.00119719
Actinopolymorpha	8.57711e-05	9.91044e-05	0.000107719	9.70314e-05	0.000133667	0.000125988	0.000136385	0.000134466	8.18863e-05	8.35084e-05	8.50049e-05	8.17409e-05	9.27985e-05	9.46453e-05	9.30207e-05	8.87931e-05	8.05828e-05	8.84351e-05	7.83821e-05	7.81327e-05	8.51192e-05	6.5011e-05	7.72234e-05	6.78867e-05
Actinopolyspora	7.27037e-06	9.81465e-06	9.94027e-06	9.51941e-06	1.13462e-05	1.70894e-05	1.61805e-05	1.58161e-05	1.35963e-05	1.30484e-05	1.80501e-05	1.09325e-05	1.22894e-05	1.33487e-05	1.32569e-05	1.26628e-05	7.91275e-06	9.99421e-06	7.48812e-06	8.19417e-06	9.396e-06	6.84572e-06	7.82376e-06	8.3686e-06
Actinorugispora	3.40861e-06	4.30685e-06	2.95719e-06	5.18818e-06	4.92789e-06	5.46071e-06	6.11074e-06	4.79747e-06	2.57219e-06	3.21771e-06	4.4305e-06	3.34454e-06	4.27524e-06	3.40538e-06	3.90833e-06	2.10402e-06	4.35765e-06	4.12042e-06	3.36223e-06	5.23229e-06	3.27581e-06	3.75017e-06	5.43347e-06	4.08829e-06
Actinospica	2.23524e-05	3.67111e-05	4.75921e-05	2.60028e-05	5.95241e-05	4.79594e-05	4.65871e-05	7.27322e-05	2.37227e-05	2.48987e-05	3.14307e-05	2.23291e-05	2.56984e-05	4.14321e-05	2.55995e-05	6.35733e-05	3.46966e-05	5.40081e-05	3.29143e-05	4.73941e-05	1.98436e-05	1.66884e-05	4.02956e-05	3.65684e-05
Actinosynnema	1.02671e-05	1.23212e-05	2.57822e-05	1.33046e-05	1.19211e-05	1.72948e-05	1.81149e-05	1.72578e-05	1.89364e-05	1.60905e-05	1.56346e-05	1.9849e-05	4.16708e-05	1.64676e-05	1.63825e-05	0.000111858	1.01457e-05	8.97366e-06	9.8007e-06	9.0302e-06	7.27072e-06	6.11038e-06	1.30028e-05	1.00587e-05
Actinotalea	9.56185e-06	1.3251e-05	1.24529e-05	1.09736e-05	1.60306e-05	1.61479e-05	1.94899e-05	1.56675e-05	1.19319e-05	1.16103e-05	1.24546e-05	1.26607e-05	1.32184e-05	1.38069e-05	1.07208e-05	1.44406e-05	1.42644e-05	1.3676e-05	1.31004e-05	1.39246e-05	1.18361e-05	7.99975e-06	1.223e-05	1.41834e-05
Actinotignum	8.82846e-08	0	1.93668e-07	0	2.65146e-07	7.79592e-08	4.19012e-07	4.00142e-07	5.79934e-08	7.87248e-08	7.61273e-08	2.76268e-07	9.09622e-08	6.14173e-07	8.87226e-08	4.52698e-07	2.90729e-07	0	0	0	3.95141e-07	1.24697e-07	1.15408e-07	2.49365e-07
Acutalibacter	1.32333e-06	3.29935e-07	1.14857e-06	5.99617e-07	6.82438e-07	6.40569e-08	6.98004e-07	3.31e-07	6.61853e-07	5.06088e-07	8.63604e-07	5.53633e-08	7.11976e-07	3.47352e-07	8.61134e-07	6.62238e-07	1.36981e-06	2.83115e-07	7.45081e-07	8.23155e-07	1.33245e-07	3.72597e-07	7.52662e-07	1.24682e-07
Acuticoccus	2.57522e-05	2.15607e-05	2.76102e-05	2.72334e-05	1.54035e-05	1.85825e-05	1.75226e-05	1.57182e-05	2.32675e-05	2.36054e-05	3.21315e-05	2.43604e-05	2.57041e-05	1.8262e-05	2.96791e-05	2.17392e-05	3.43656e-05	3.26745e-05	3.72902e-05	3.01199e-05	2.43626e-05	2.22211e-05	2.42567e-05	2.55304e-05
Adhaeribacter	0.000142298	0.000120775	0.000182039	0.00014806	0.000145916	0.0001489	0.000146537	0.000130074	0.000153795	0.000162162	0.000153019	0.000150246	0.000157595	0.00013736	0.000168904	0.000147809	0.000162022	0.000142894	0.000152786	0.00013993	0.000191682	0.000123548	0.000127022	0.000146935
Adlercreutzia	4.27906e-07	2.73259e-07	6.06129e-07	1.18411e-06	8.50988e-08	4.65124e-07	6.79318e-07	2.36383e-07	5.32158e-07	2.65627e-07	1.98332e-07	3.97188e-07	1.14051e-06	4.46831e-07	1.27328e-06	3.47542e-07	8.55209e-07	2.08371e-06	6.64385e-07	1.51606e-07	3.68558e-07	1.07111e-07	2.36048e-07	1.41185e-07
Advenella	1.64249e-05	1.5003e-05	1.39509e-05	1.49518e-05	1.26544e-05	1.08137e-05	1.32163e-05	1.48946e-05	1.45414e-05	1.05233e-05	1.0626e-05	1.0751e-05	1.14916e-05	1.15185e-05	1.36668e-05	1.30816e-05	1.37338e-05	1.26063e-05	9.83517e-06	8.22688e-06	1.0512e-05	7.84324e-06	1.17396e-05	1.22204e-05
Aequorivita	1.27129e-05	1.28809e-05	1.80297e-05	1.5743e-05	1.44948e-05	1.79425e-05	1.62568e-05	1.42957e-05	2.22892e-05	2.14731e-05	1.85218e-05	1.59804e-05	1.39606e-05	1.54639e-05	2.05282e-05	1.45382e-05	1.99783e-05	1.65019e-05	2.0457e-05	1.61084e-05	2.77105e-05	1.49008e-05	1.64319e-05	2.12711e-05
Aeribacillus	5.02393e-07	8.87341e-07	1.80264e-06	1.09603e-06	2.57046e-06	1.07903e-06	2.63378e-06	1.05319e-06	1.43592e-06	1.57051e-06	8.03326e-07	9.78984e-07	2.22506e-06	1.05106e-06	6.0794e-07	2.13006e-06	5.20691e-07	1.20295e-06	1.45554e-06	1.91819e-06	6.59621e-07	1.0799e-06	5.64724e-07	1.41104e-06
Aeriscardovia	1.30869e-06	1.31807e-06	1.14207e-06	1.6021e-06	1.81858e-06	2.49371e-06	1.22535e-06	2.22949e-06	1.73165e-06	1.39437e-06	1.3703e-06	2.6517e-07	6.42991e-07	6.91122e-07	1.36841e-06	1.16055e-06	1.15511e-06	9.52216e-07	8.80094e-07	6.79275e-07	1.17642e-06	1.41773e-06	1.43919e-06	1.176e-06
Aerococcus	1.0178e-05	1.52929e-05	1.53694e-05	9.90417e-06	2.44902e-05	1.1988e-05	7.98241e-06	1.42496e-05	1.57026e-05	2.01088e-05	8.3788e-06	1.10864e-05	1.33711e-05	1.98978e-05	9.31884e-06	1.2979e-05	1.16451e-05	3.50347e-05	1.65136e-05	1.63726e-05	1.03132e-05	1.66051e-05	1.38347e-05	1.26506e-05
Aeromicrobium	4.76051e-05	6.42882e-05	8.06733e-05	5.82069e-05	8.30695e-05	8.80721e-05	7.93127e-05	8.55495e-05	0.000179289	0.000210975	0.000146621	0.0002089	0.000851169	0.000851408	0.000517621	0.000678934	0.000158369	0.000232694	0.000139108	0.000128331	8.81463e-05	8.72703e-05	0.000116943	0.000100722
Aeromonas	9.28352e-05	0.000189967	0.000234388	2.60603e-05	5.47819e-05	3.08715e-05	3.02735e-05	5.09564e-05	0.000142084	0.000181805	4.38325e-05	8.43121e-05	3.94397e-05	5.8587e-05	3.47632e-05	3.45575e-05	4.48452e-05	0.000103693	4.96756e-05	6.34107e-05	3.83371e-05	7.67969e-05	6.32309e-05	3.87732e-05
Aeropyrum	0	0	1.0214e-07	0	0	0	0	0	7.69913e-08	3.1175e-07	4.84841e-07	0	8.86594e-08	0	4.92228e-07	4.6176e-07	0	1.4283e-07	2.85938e-07	1.32416e-07	0	0	1.09565e-07	0
Aerosticca	8.54664e-06	1.17822e-05	1.14847e-05	1.45757e-05	1.17569e-05	1.13488e-05	1.02016e-05	1.28803e-05	1.08108e-05	1.15388e-05	8.74422e-06	7.44685e-06	1.59393e-05	1.17131e-05	1.29222e-05	1.54689e-05	6.63201e-06	4.28393e-06	5.1676e-06	2.78406e-06	8.02922e-06	5.20172e-06	6.09899e-06	5.43195e-06
Aerosvirus	0	0	0	0	0	0	0	0	0	0	3.7683e-08	0	0	0	0	0	0	0	0	5.23042e-08	7.05986e-07	0	0	0
Aestuariibacter	1.07924e-06	1.14203e-06	1.13086e-06	9.80308e-07	1.816e-06	1.17742e-06	1.65992e-06	1.70874e-06	9.66441e-07	1.17969e-06	9.66385e-07	2.36655e-06	1.86776e-07	3.89532e-07	1.19245e-06	5.71223e-07	9.97109e-07	1.76952e-06	1.56162e-06	1.37236e-06	1.15281e-06	1.29738e-06	4.48237e-07	9.14737e-07
Aestuariicella	6.31412e-06	5.23172e-06	6.65443e-06	5.16976e-06	7.58006e-06	8.23922e-06	7.1282e-06	5.63512e-06	1.25635e-05	3.77126e-06	6.35746e-06	8.15494e-06	5.76275e-06	4.95367e-06	5.16259e-06	6.40575e-06	6.53805e-06	5.88884e-06	5.73515e-06	3.66939e-06	6.14137e-06	5.24311e-06	5.50606e-06	8.04551e-06
Aestuariimicrobium	3.2452e-07	7.73056e-07	7.86194e-07	8.9397e-07	5.61474e-07	1.02996e-06	7.84125e-07	1.09176e-06	8.06272e-07	7.77974e-07	1.09007e-06	8.93031e-07	1.5746e-06	1.10828e-06	3.8078e-07	1.15871e-06	1.24521e-06	6.5569e-07	9.69821e-07	1.42138e-06	6.06479e-07	4.68908e-07	7.6751e-07	8.28633e-07
Aestuariisphingobium	7.41395e-06	6.79028e-06	9.96322e-06	1.00757e-05	7.99687e-06	7.22843e-06	8.35247e-06	8.19237e-06	1.94483e-05	7.82183e-06	8.79936e-06	7.12831e-06	6.11687e-06	9.31346e-06	8.05794e-06	8.00516e-06	8.51803e-06	1.46091e-05	1.55178e-05	1.35035e-05	1.49253e-05	6.81636e-06	8.45048e-06	9.47711e-06
Aestuariispira	4.94041e-06	6.53489e-06	5.32485e-06	6.1434e-06	3.09155e-06	5.8611e-06	5.7592e-06	4.13122e-06	4.89689e-06	7.11426e-06	6.21058e-06	4.96647e-06	5.62952e-06	6.97212e-06	5.25424e-06	3.7205e-06	4.74889e-06	5.0477e-06	5.17085e-06	5.8663e-06	6.66997e-06	5.59116e-06	4.49137e-06	4.78086e-06
Aestuariivirga	1.26705e-05	1.83788e-05	1.47398e-05	1.46414e-05	1.3254e-05	1.3073e-05	1.6151e-05	1.41026e-05	1.50242e-05	1.54324e-05	1.94662e-05	1.16743e-05	1.62604e-05	1.27524e-05	1.15349e-05	1.41613e-05	2.40243e-05	1.96189e-05	1.8825e-05	2.01965e-05	9.78071e-06	1.07166e-05	1.24422e-05	1.89779e-05
Aestuariivita	9.60111e-07	1.05753e-06	4.62785e-07	3.05939e-07	1.21922e-06	1.48983e-06	4.60751e-07	5.03681e-07	7.59129e-07	8.46138e-07	1.01097e-06	5.73384e-07	1.28075e-06	3.75053e-07	5.51503e-07	9.0385e-07	3.18798e-07	7.04934e-07	1.49339e-06	2.51838e-06	9.98712e-07	3.16109e-07	1.15408e-07	3.15101e-07
Aetherobacter	7.15698e-07	3.03048e-06	2.93306e-06	1.38299e-06	1.12677e-06	2.39887e-06	1.49627e-06	1.07962e-06	1.54783e-06	1.66669e-06	1.15428e-06	7.94733e-07	8.50166e-07	4.21556e-07	1.26399e-06	1.26129e-06	2.72812e-06	1.61194e-07	4.84052e-07	7.60632e-07	4.40923e-07	1.73481e-07	1.0045e-06	9.92391e-07
Afifella	8.31852e-06	1.40408e-05	1.30746e-05	1.13629e-05	1.05421e-05	1.14388e-05	1.39309e-05	1.11047e-05	2.15623e-05	1.45499e-05	1.54955e-05	1.46688e-05	1.89279e-05	1.42413e-05	1.21466e-05	1.14239e-05	6.35927e-05	4.35491e-05	3.19646e-05	2.69082e-05	1.32052e-05	1.15603e-05	1.08316e-05	1.40968e-05
Afipia	0.000358858	0.000391385	0.000362557	0.000411568	0.000324289	0.000328385	0.000383305	0.000374349	0.000519219	0.000432111	0.000413473	0.000422293	0.00046705	0.000360201	0.000384857	0.000395286	0.000451908	0.000477435	0.000437593	0.000393369	0.000311665	0.000287862	0.00036249	0.00037036
Agaribacter	1.21391e-07	0	0	1.1033e-07	0	3.21582e-07	0	0	0	0	1.04675e-07	0	0	0	0	3.8607e-08	1.86672e-08	1.56716e-07	3.13737e-07	2.90579e-07	2.45134e-07	3.53914e-08	0	0
Agaribacterium	5.69299e-07	3.81541e-07	7.86333e-07	9.92969e-08	4.3293e-07	4.6574e-07	2.43885e-07	6.47309e-07	1.96156e-07	1.31225e-06	5.15387e-07	1.08752e-06	5.19935e-07	4.81034e-07	1.05402e-06	2.23808e-07	4.2968e-07	2.29146e-07	7.19398e-08	6.6957e-07	6.13993e-07	2.24513e-07	1.88241e-07	6.21788e-07
Agaricus	3.64388e-07	4.44396e-07	3.31208e-07	1.6505e-06	3.82888e-07	2.92347e-07	1.14511e-07	1.16933e-06	1.39347e-06	1.96108e-06	9.66694e-07	2.218e-06	1.92294e-06	6.02675e-06	1.09301e-06	1.64493e-06	2.40884e-06	1.81183e-06	2.96537e-06	5.4122e-06	9.86157e-07	7.12738e-06	7.14324e-06	1.13629e-06
Agarilytica	4.33517e-06	7.32755e-06	3.96374e-06	5.30169e-06	3.56647e-06	7.05712e-06	6.40882e-06	4.46925e-06	4.8317e-06	5.62248e-06	5.33957e-06	5.53209e-06	8.01254e-06	3.51957e-06	6.6307e-06	5.70384e-06	2.01846e-06	5.26287e-06	3.42508e-06	3.33695e-06	3.9912e-06	1.83427e-06	4.03644e-06	3.45718e-06
Agarivorans	2.36844e-06	1.82661e-06	2.67884e-06	1.05257e-06	1.6447e-06	2.05362e-06	2.22437e-06	1.31351e-06	5.86445e-06	4.7308e-06	2.59998e-06	5.49405e-06	2.8703e-06	6.76369e-06	2.38084e-06	4.6e-06	4.7872e-06	7.01386e-06	6.54639e-06	8.94894e-06	2.89246e-06	1.00296e-05	8.89778e-06	3.68556e-06
Agatevirus	0	3.03386e-07	0	0	0	0	0	0	0	0	0	0	0	0	0	0	0	0	0	0	0	0	0	0
Agathobacter	0	0	0	1.1682e-07	0	0	0	0	0	0	0	0	0	0	4.22737e-07	0	0	1.65935e-07	0	0	0	0	0	3.89211e-07
Agathobaculum	3.65599e-07	4.65823e-07	7.84867e-08	2.91765e-07	5.80961e-07	1.61334e-07	2.38371e-07	6.57926e-08	0	9.99199e-08	0	1.35311e-07	0	0	0	1.81523e-07	0	9.47014e-07	5.21897e-07	0	1.71177e-07	7.47311e-07	1.12411e-07	0
Aggregatibacter	3.14684e-07	2.16332e-07	1.97177e-06	7.66118e-07	6.11469e-07	3.57016e-07	2.16595e-07	3.87729e-07	6.03655e-07	3.67655e-08	1.97964e-06	3.34572e-07	1.00246e-06	3.82017e-07	8.73729e-07	1.82395e-07	6.58069e-07	0	2.82364e-07	7.26447e-07	2.45134e-07	7.84412e-07	0	8.62613e-07
Aggregicoccus	0.000202184	0.000231064	0.000202472	0.000203415	0.000221524	0.000199448	0.00020589	0.000187696	0.000163825	0.000169291	0.000167878	0.00016113	0.00019022	0.00015815	0.000207529	0.000202649	0.00012851	0.0001334	0.000118044	0.000120215	0.000160659	0.000120157	0.000143499	0.000144359
Agitococcus	1.39901e-06	3.07373e-06	1.67942e-06	1.25269e-06	1.08078e-06	2.1447e-06	3.90505e-06	2.58668e-06	1.30473e-06	1.56099e-06	2.00516e-06	1.66397e-06	8.68195e-07	1.4485e-06	1.26441e-06	1.33654e-06	1.3452e-06	2.35928e-06	1.43679e-06	1.73038e-06	2.83594e-06	9.50081e-07	1.52775e-06	1.00363e-06
Agreia	2.01387e-06	1.6232e-06	9.39732e-06	3.05401e-06	1.6282e-06	3.84414e-06	3.66887e-06	3.59361e-06	9.20538e-07	3.21049e-06	2.09865e-06	1.96049e-06	1.78974e-06	3.42206e-06	1.85918e-06	2.42035e-06	2.54191e-06	3.01379e-06	1.33186e-06	1.67039e-06	1.74797e-06	1.16289e-06	1.0923e-06	1.34044e-06
Agrobacterium	9.26096e-05	0.00012684	9.53805e-05	0.000106952	0.000122668	0.000110039	0.000109153	0.000185916	0.000109066	8.26191e-05	0.000101624	0.000126133	8.15612e-05	0.000103842	7.43891e-05	0.000104709	8.42788e-05	0.000131292	0.000124162	9.2003e-05	7.26639e-05	6.90333e-05	7.4113e-05	8.97807e-05
Agrococcus	4.59644e-06	3.7417e-06	5.59049e-06	4.31691e-06	5.97929e-06	5.758e-06	4.094e-06	5.32305e-06	6.22178e-06	6.08685e-06	7.51241e-06	5.47847e-06	5.36517e-06	7.44519e-06	6.11674e-06	6.16419e-06	3.98706e-06	9.28244e-06	5.39394e-06	4.0929e-06	9.65139e-06	5.95386e-06	6.01944e-06	6.64657e-06
Agrocybe	1.11133e-06	2.92616e-06	1.1358e-06	3.35841e-06	1.01182e-06	9.37363e-07	1.15433e-06	3.10352e-06	1.52063e-06	2.82242e-06	3.01375e-06	2.6025e-06	1.22865e-06	4.15191e-06	1.93928e-06	1.71564e-06	2.72489e-06	2.09808e-06	2.91456e-06	4.42109e-06	1.19076e-06	8.32929e-06	4.31203e-06	2.08562e-06
Agromyces	5.87687e-05	6.42093e-05	9.33141e-05	7.12707e-05	6.4818e-05	6.95247e-05	6.81359e-05	7.11875e-05	7.96363e-05	9.12354e-05	8.44498e-05	8.15023e-05	8.04155e-05	7.08541e-05	8.24308e-05	7.05131e-05	0.000111476	0.000108283	9.09044e-05	0.000107567	0.000109569	9.19877e-05	9.6248e-05	0.000107208
Ahduovirus	8.36381e-08	4.52901e-07	5.98073e-07	8.31624e-08	5.12546e-07	7.38561e-08	3.35774e-07	2.00319e-07	1.10514e-07	7.45814e-08	4.17587e-07	2.43356e-07	3.39911e-07	6.49936e-08	4.79218e-07	2.44357e-07	2.33e-07	5.39884e-08	2.16164e-07	4.54819e-07	2.1112e-07	1.27319e-07	8.28289e-08	0
Ahniella	3.5067e-05	3.75516e-05	3.99583e-05	3.27703e-05	3.17252e-05	3.50158e-05	3.46855e-05	3.02928e-05	3.74583e-05	3.9156e-05	3.56008e-05	3.34861e-05	3.89165e-05	2.6665e-05	3.62238e-05	4.10865e-05	2.98907e-05	2.90145e-05	3.49872e-05	2.92233e-05	2.23491e-05	2.10676e-05	2.7212e-05	3.25775e-05
Ahrensia	8.24815e-06	8.05943e-06	6.85931e-06	8.4181e-06	7.02125e-06	8.50997e-06	9.09669e-06	1.12422e-05	8.15995e-06	7.62171e-06	1.03339e-05	6.09306e-06	8.25114e-06	6.55243e-06	7.07151e-06	8.18002e-06	1.14218e-05	9.75322e-06	4.49878e-06	1.11489e-05	6.58288e-06	5.50978e-06	6.36014e-06	4.25393e-06
Aidingimonas	4.28852e-06	5.22832e-06	4.74312e-06	7.09504e-06	5.17977e-06	4.35172e-06	4.70784e-06	5.18698e-06	1.83735e-06	2.06468e-06	2.35368e-06	3.41884e-06	4.32235e-06	4.48823e-06	4.69896e-06	3.51765e-06	2.15568e-06	3.15615e-06	1.89273e-06	1.86044e-06	2.69408e-06	1.02073e-06	1.85152e-06	2.63186e-06
Akanthomyces	0	0	0	1.07348e-07	0	0	0	0	3.12127e-07	0	3.05538e-07	0	0	0	0	0	0	0	0	0	0	0	0	0
Akkermansia	2.14997e-06	3.28527e-06	4.16651e-06	2.61058e-06	2.83182e-06	2.14548e-06	2.13824e-06	1.67564e-06	2.7774e-06	4.41469e-07	1.94424e-06	2.0125e-06	2.0772e-06	7.40392e-07	1.82969e-06	4.15366e-06	1.4093e-06	8.45172e-07	2.10926e-06	2.15433e-06	2.83664e-06	1.26449e-06	1.74229e-06	2.39651e-06
Albibacterium	5.54191e-06	3.181e-06	4.73686e-06	5.3109e-06	6.41046e-06	5.259e-06	7.253e-06	4.13047e-06	4.23265e-06	5.17546e-06	4.49181e-06	4.0383e-06	5.07484e-06	3.66861e-06	4.60095e-06	3.97279e-06	5.36848e-06	3.70235e-06	3.05999e-06	2.38384e-06	6.34732e-06	1.82347e-06	5.02676e-06	3.80004e-06
Albidovulum	1.91912e-06	2.83038e-06	2.72762e-06	3.56957e-06	2.94414e-06	2.59051e-06	2.22824e-06	1.47381e-06	1.14097e-06	4.20633e-06	5.25149e-06	4.22317e-06	4.40977e-06	3.00223e-06	3.3832e-06	3.41519e-06	3.17297e-06	3.12525e-06	1.48497e-06	3.55553e-06	3.32089e-06	6.48671e-07	1.75454e-06	1.46947e-06
Albimonas	8.03001e-06	5.19597e-06	6.34489e-06	7.54762e-06	3.82477e-06	5.9272e-06	5.52708e-06	4.22638e-06	5.32847e-06	4.91742e-06	8.495e-06	3.89569e-06	7.23075e-06	5.22687e-06	5.82605e-06	7.00752e-06	7.12203e-06	9.71082e-06	8.12259e-06	6.21757e-06	6.92837e-06	6.42621e-06	1.021e-05	7.78883e-06
Alcaligenes	9.94591e-06	9.16609e-06	1.24097e-05	8.55764e-06	5.16041e-06	7.21121e-06	5.62613e-06	6.04226e-06	7.01902e-06	3.69834e-06	6.80868e-06	6.22027e-06	4.09956e-06	4.12843e-06	8.86094e-06	4.65242e-06	6.39496e-06	5.02854e-06	4.53126e-06	4.2372e-06	6.52232e-06	6.15666e-06	4.66458e-06	6.7316e-06
Alcanivorax	7.58948e-05	8.69691e-05	6.51779e-05	0.000103284	8.04643e-05	8.02876e-05	9.25731e-05	8.54872e-05	5.98589e-05	7.04911e-05	5.97986e-05	6.66709e-05	9.1985e-05	0.000111573	0.000114875	8.80666e-05	4.04505e-05	5.33013e-05	4.55735e-05	5.14345e-05	5.81335e-05	6.03709e-05	6.17899e-05	6.0072e-05
Aldersonia	2.3371e-06	2.59814e-06	1.96881e-06	3.38293e-06	3.27047e-06	6.38514e-06	3.85498e-06	4.73304e-06	3.65379e-06	2.82614e-06	2.63338e-06	3.44362e-06	3.05227e-06	3.40925e-06	3.55251e-06	3.63979e-06	3.06547e-06	1.68121e-06	3.06472e-06	3.57309e-06	2.7867e-06	1.89029e-06	3.54711e-06	1.13766e-06
Algibacter	5.25919e-06	3.06738e-06	2.95056e-06	4.20098e-06	3.69025e-06	3.91357e-06	4.74888e-06	4.58717e-06	3.46433e-06	3.09838e-06	5.44425e-06	4.74911e-06	3.80182e-06	4.16597e-06	5.74659e-06	5.26697e-06	5.7358e-06	5.79341e-06	6.6722e-06	3.65332e-06	5.19323e-06	3.0913e-06	2.6679e-06	6.24982e-06
Algicola	5.32114e-06	6.41236e-06	6.69355e-06	6.78433e-06	4.90136e-06	6.82159e-06	7.51694e-06	6.9087e-06	4.71838e-06	4.29212e-06	1.02914e-05	7.73404e-06	6.58642e-06	6.81554e-06	4.67762e-06	5.56632e-06	7.72413e-06	5.42196e-06	9.07299e-06	8.68053e-06	6.80239e-06	6.31701e-06	5.64083e-06	6.61926e-06
Alginatibacterium	0	2.99545e-07	3.28952e-07	2.83706e-07	2.72368e-07	3.6961e-07	1.99966e-07	9.74373e-08	2.49066e-07	8.03538e-07	1.76517e-07	5.30765e-07	3.42954e-07	6.46842e-08	5.3461e-07	8.43115e-07	0	0	6.05856e-07	6.80635e-07	4.67734e-07	2.26838e-07	3.76331e-07	3.99803e-07
Algiphilus	1.16051e-05	8.42043e-06	8.70348e-06	8.87193e-06	5.50873e-06	5.4674e-06	6.17198e-06	5.13624e-06	1.24222e-05	1.49565e-05	1.75088e-05	1.61058e-05	1.67894e-05	6.29906e-06	1.48703e-05	9.783e-06	1.49807e-05	1.04264e-05	1.30438e-05	9.61923e-06	7.37559e-06	5.86503e-06	6.02811e-06	7.64044e-06
Algisphaera	2.41104e-05	2.90099e-05	3.49566e-05	3.15985e-05	3.6004e-05	3.88838e-05	3.43455e-05	2.7514e-05	1.98563e-05	2.67516e-05	2.21237e-05	2.62785e-05	2.49067e-05	2.17095e-05	2.94134e-05	3.30575e-05	1.5649e-05	1.81612e-05	1.58419e-05	1.39137e-05	2.06953e-05	1.6266e-05	1.70785e-05	2.44707e-05
Algoriella	6.47422e-06	5.62117e-06	4.66577e-06	4.61464e-06	4.48196e-06	4.77297e-06	5.01385e-06	5.12706e-06	6.53074e-06	7.71492e-06	6.39777e-06	5.31669e-06	7.16538e-06	3.72408e-06	5.80703e-06	5.21784e-06	6.74432e-06	5.56979e-06	4.57037e-06	7.70967e-06	6.38131e-06	6.74912e-06	6.58446e-06	7.65105e-06
Algoriphagus	5.50308e-05	6.90137e-05	7.94296e-05	6.67584e-05	6.07391e-05	6.88855e-05	6.8067e-05	5.37793e-05	7.61941e-05	8.18392e-05	7.47502e-05	7.49489e-05	7.67995e-05	6.24193e-05	7.45416e-05	6.74663e-05	8.18649e-05	8.50184e-05	8.82498e-05	7.46408e-05	8.01435e-05	6.19152e-05	5.99311e-05	6.883e-05
Aliagarivorans	3.01127e-07	2.92149e-07	6.2189e-07	1.2576e-06	3.88557e-07	3.97705e-07	8.84642e-07	1.10527e-06	3.62263e-06	1.52903e-06	1.49477e-06	1.18912e-06	6.80537e-07	3.09436e-07	4.5234e-07	1.46769e-06	5.31077e-07	4.89013e-07	1.20742e-06	2.85719e-07	5.23766e-07	8.07836e-07	5.06278e-07	7.08002e-07
Alicycliphilus	3.8886e-05	4.3999e-05	3.09194e-05	3.07442e-05	2.30748e-05	2.69575e-05	2.46693e-05	4.20977e-05	8.12893e-05	2.34159e-05	2.62859e-05	2.80657e-05	2.38684e-05	2.29473e-05	2.38575e-05	1.94914e-05	3.28567e-05	2.84262e-05	3.33117e-05	2.70608e-05	2.46022e-05	2.59916e-05	3.32203e-05	2.99752e-05
Alicyclobacillus	3.72938e-05	5.53385e-05	3.29882e-05	5.21183e-05	5.11983e-05	4.84727e-05	5.29531e-05	5.13782e-05	3.8529e-05	3.94277e-05	3.43443e-05	3.1274e-05	5.43161e-05	4.53683e-05	5.25848e-05	4.84439e-05	2.91553e-05	2.75499e-05	2.53292e-05	2.33268e-05	2.32967e-05	2.4891e-05	2.3336e-05	3.40565e-05
Alienimonas	1.16108e-05	1.39634e-05	1.53588e-05	1.80947e-05	1.38065e-05	1.43688e-05	1.42019e-05	1.35157e-05	1.54565e-05	1.0962e-05	1.13921e-05	1.24985e-05	1.68311e-05	1.44737e-05	1.8007e-05	1.49297e-05	1.13869e-05	1.20917e-05	9.24907e-06	9.36239e-06	1.55893e-05	9.54872e-06	1.07484e-05	1.12759e-05
Aliiarcobacter	0	9.73831e-08	0	0	2.87553e-07	1.90567e-07	0	0	0	0	0	2.68299e-07	0	3.35399e-07	3.6854e-07	0	0	0	0	0	0	0	0	0
Aliicoccus	6.23081e-07	0	1.43147e-07	9.09251e-07	5.85935e-07	3.06548e-07	2.57766e-07	8.27019e-07	3.06247e-07	0	1.94145e-07	1.38362e-07	0	4.16374e-07	5.58946e-07	0	1.03029e-07	0	0	0	2.28279e-08	9.56301e-08	4.09532e-07	3.17373e-07
Aliidiomarina	4.51339e-06	3.82167e-06	3.46095e-06	3.85394e-06	4.64795e-06	3.73501e-06	4.62108e-06	3.49748e-06	4.1647e-06	5.3617e-06	4.95038e-06	6.02139e-06	5.65464e-06	3.03158e-06	4.0416e-06	3.65358e-06	2.6101e-06	2.4209e-06	6.19435e-06	4.31524e-06	3.53556e-06	3.30164e-06	3.01621e-06	3.44348e-06
Aliifodinibius	3.65653e-05	3.61512e-05	3.37304e-05	3.91707e-05	3.30937e-05	3.3082e-05	3.93241e-05	2.6926e-05	4.71961e-05	4.61899e-05	4.16245e-05	4.49611e-05	3.95263e-05	3.74535e-05	4.20856e-05	4.07378e-05	5.1906e-05	5.06581e-05	3.95059e-05	5.20128e-05	5.52971e-05	5.07445e-05	4.52384e-05	6.05573e-05
Aliiglaciecola	3.55094e-06	4.15152e-06	5.88386e-06	4.2474e-06	4.81108e-06	5.01859e-06	5.19409e-06	3.77863e-06	3.6649e-06	3.58037e-06	3.41847e-06	3.83703e-06	2.55753e-06	2.91153e-06	2.80408e-06	3.76266e-06	4.65959e-06	4.92302e-06	3.82856e-06	3.37108e-06	3.16454e-06	2.61699e-06	2.26139e-06	5.10451e-06
Aliihoeflea	3.16921e-06	1.91169e-06	3.08618e-06	2.78173e-06	2.97457e-06	2.30436e-06	2.49663e-06	2.63466e-06	2.15056e-06	1.35953e-06	1.94169e-06	2.00041e-06	2.87767e-06	1.29485e-06	2.46078e-06	2.20202e-06	2.73116e-06	4.89252e-06	2.41363e-06	9.73765e-07	2.98176e-06	1.94356e-06	2.19802e-06	1.77128e-06
Aliikangiella	7.33659e-06	9.76638e-06	9.69028e-06	7.39098e-06	5.99852e-06	5.41136e-06	8.08933e-06	1.13818e-05	1.47813e-05	1.00852e-05	1.55067e-05	1.40052e-05	8.57281e-06	7.69766e-06	1.05266e-05	8.35802e-06	1.28706e-05	1.02418e-05	1.11503e-05	7.73679e-06	1.11144e-05	1.0565e-05	7.7173e-06	7.16804e-06
Aliiroseovarius	4.76444e-06	3.4695e-06	8.73343e-06	6.55326e-06	5.95141e-06	7.80953e-06	6.25785e-06	6.57583e-06	5.63856e-06	6.5089e-06	6.80281e-06	5.7944e-06	6.15055e-06	4.99431e-06	6.32618e-06	5.39055e-06	6.75905e-06	7.70219e-06	6.59751e-06	3.90154e-06	4.94523e-06	4.63856e-06	4.36244e-06	6.62225e-06
Aliishimia	1.23974e-07	2.6867e-07	4.799e-07	6.07259e-07	4.31908e-07	4.34794e-07	2.85357e-07	6.85685e-07	1.06384e-06	5.73058e-07	1.54869e-06	7.13101e-07	1.91378e-07	9.08357e-07	1.25509e-06	9.33113e-07	1.17342e-07	6.32089e-07	0	3.44863e-07	5.9635e-07	2.78676e-07	2.21623e-06	7.59014e-07
Aliivibrio	2.85246e-06	1.68482e-06	2.92789e-06	3.3357e-06	2.14578e-06	2.59195e-06	2.20739e-06	3.41073e-06	2.74854e-06	1.49801e-06	1.48082e-06	2.11599e-06	2.3352e-06	3.25477e-07	1.60162e-06	3.84139e-06	2.0501e-06	1.06295e-06	1.32659e-06	5.10886e-07	1.02569e-06	8.09397e-07	1.03333e-06	1.30968e-06
Alishewanella	1.70643e-06	1.74245e-06	1.79466e-06	1.48771e-06	1.78815e-06	1.91503e-06	5.71125e-07	1.3299e-06	1.91769e-06	2.2207e-06	4.89564e-06	1.79497e-06	1.42658e-06	9.87898e-07	2.36209e-06	2.16206e-06	2.51686e-06	2.78057e-06	3.27001e-06	2.79433e-06	2.60581e-06	1.105e-06	2.44844e-06	1.27207e-06
Alistipes	9.11457e-06	1.03312e-05	1.03163e-05	1.08103e-05	1.24405e-05	1.15821e-05	9.84279e-06	7.18289e-06	9.09585e-06	9.1172e-06	9.59043e-06	9.28913e-06	9.87646e-06	8.72852e-06	9.38459e-06	1.15786e-05	1.31509e-05	1.0608e-05	1.30447e-05	8.03402e-06	1.17163e-05	4.45449e-06	8.55246e-06	7.50789e-06
Aliterella	1.12727e-05	1.41016e-05	1.24661e-05	1.40229e-05	1.24338e-05	1.11489e-05	1.08859e-05	1.07618e-05	1.1288e-05	9.47449e-06	9.92007e-06	1.30249e-05	1.3493e-05	1.1914e-05	1.67976e-05	1.14487e-05	1.27755e-05	1.05025e-05	1.00532e-05	1.05019e-05	1.406e-05	1.42315e-05	1.11691e-05	1.6376e-05
Alkalibacillus	2.98015e-07	0	3.49829e-07	4.03948e-08	0	0	0	1.85251e-07	9.87068e-08	9.99199e-08	2.89869e-07	6.47664e-07	0	1.10536e-06	0	3.6118e-07	4.85583e-07	5.89405e-07	2.17203e-09	3.79512e-07	1.31807e-07	2.14223e-07	2.91022e-07	0
Alkalibacter	0	0	0	1.41853e-07	0	0	0	0	0	0	5.57612e-07	4.03078e-07	1.25073e-07	4.50908e-07	0	0	1.73918e-07	1.00746e-07	5.04221e-07	1.86801e-07	7.87931e-08	0	0	8.57192e-08
Alkalibacterium	2.05651e-07	1.59627e-06	2.24532e-07	1.45757e-07	0	5.19575e-07	8.38431e-08	4.5727e-07	5.18744e-07	6.69909e-07	4.58099e-07	1.12229e-06	1.02256e-06	7.64272e-07	6.10801e-07	9.03205e-07	5.95758e-07	0	1.1613e-06	4.60345e-07	5.13689e-07	8.57582e-07	9.218e-07	6.36951e-07
Alkalibaculum	6.63283e-07	1.40921e-06	1.36929e-06	7.73423e-07	6.62424e-07	4.47697e-07	2.89553e-07	1.67412e-06	9.44494e-07	1.29875e-06	8.17426e-07	4.13216e-07	8.12726e-07	1.28552e-06	1.05372e-06	6.05419e-07	1.99511e-07	9.64408e-08	0	9.53564e-07	6.11094e-07	4.89606e-07	6.06273e-07	2.76671e-07
Alkalicoccus	3.44343e-07	4.62107e-07	8.87647e-08	5.841e-07	0	1.83761e-07	5.32173e-07	6.52018e-07	0	5.6115e-07	0	0	6.18629e-07	5.43347e-08	3.32427e-07	3.4742e-07	0	7.94618e-08	1.21385e-06	7.40062e-07	1.68542e-07	7.99133e-07	2.82267e-07	0
Alkaliflexus	5.224e-07	1.79146e-06	5.30916e-07	3.86621e-07	1.16926e-06	7.57375e-07	2.92495e-07	8.14574e-07	1.17236e-06	1.46507e-06	4.36904e-07	7.08717e-07	1.71161e-06	8.10318e-07	9.49389e-07	1.23716e-06	1.39659e-06	3.1007e-07	4.70347e-07	1.49841e-06	3.5351e-07	9.01172e-07	1.14645e-06	1.96749e-06
Alkalihalobacillus	6.37332e-06	7.30925e-06	9.31969e-06	8.84448e-06	7.5644e-06	5.65856e-06	8.43866e-06	6.53855e-06	7.70131e-06	7.96108e-06	7.0954e-06	7.05135e-06	8.50743e-06	8.03261e-06	8.27293e-06	9.17511e-06	6.90777e-06	6.83714e-06	9.27883e-06	5.56031e-06	7.02015e-06	5.38344e-06	6.33287e-06	7.70948e-06
Alkalilacustris	6.77194e-07	1.48515e-06	3.17706e-07	2.1119e-06	1.08345e-06	7.44109e-07	3.10476e-06	1.39846e-06	2.69318e-06	6.6791e-07	3.09483e-06	1.2797e-06	1.59482e-06	9.55102e-07	6.27095e-07	2.4969e-06	2.78891e-06	3.59611e-06	2.43247e-06	4.32768e-06	6.11963e-07	1.04834e-06	1.25288e-06	6.3815e-07
Alkalilimnicola	1.72457e-05	2.14294e-05	1.72517e-05	1.86533e-05	1.84556e-05	1.73308e-05	1.95726e-05	1.55218e-05	1.90852e-05	2.14382e-05	2.30269e-05	1.75562e-05	2.33489e-05	1.69109e-05	2.07622e-05	2.09999e-05	1.81854e-05	2.32347e-05	2.15577e-05	2.10475e-05	2.09173e-05	1.5223e-05	1.62541e-05	1.63611e-05
Alkalimonas	2.3647e-07	4.17277e-07	4.04702e-07	9.81376e-07	8.03754e-07	9.1142e-07	1.1049e-06	7.15996e-07	7.4873e-07	6.80035e-07	8.96619e-07	3.81805e-07	7.79421e-07	3.62276e-07	1.09801e-06	8.04918e-07	0	1.14813e-06	0	5.77862e-07	8.37249e-07	1.60667e-07	1.70062e-06	8.47468e-07
Alkalinema	2.05553e-05	2.15497e-05	2.21546e-05	2.35298e-05	2.2852e-05	2.33107e-05	2.6378e-05	2.15319e-05	1.85204e-05	1.96672e-05	2.50022e-05	2.165e-05	2.1195e-05	2.18245e-05	2.48334e-05	2.05861e-05	1.69357e-05	1.92377e-05	1.11331e-05	1.16573e-05	1.87098e-05	1.86654e-05	1.64961e-05	1.77005e-05
Alkaliphilus	1.88292e-06	1.13892e-06	1.51984e-06	3.05695e-06	1.54092e-06	2.58946e-06	2.14987e-06	1.33841e-06	2.44433e-06	3.50562e-06	2.56335e-06	3.05918e-06	2.54344e-06	2.08732e-06	1.68482e-06	1.60464e-06	1.70869e-06	9.75361e-07	1.42498e-06	3.28693e-06	3.70515e-06	1.5937e-06	1.27288e-06	2.68309e-06
Alkalispirillum	4.42674e-06	2.45854e-06	2.75616e-06	3.69093e-06	2.67454e-06	3.21156e-06	2.5164e-06	1.87762e-06	4.28831e-06	2.13963e-06	2.36323e-06	2.13535e-06	1.91078e-06	1.6512e-06	3.42104e-06	3.55559e-06	2.99599e-06	2.37396e-06	1.54641e-06	2.31362e-06	1.94674e-06	1.68046e-06	3.84496e-06	2.29325e-06
Alkalispirochaeta	5.2948e-07	1.40521e-06	1.85153e-06	3.01062e-06	7.17283e-07	1.63285e-06	1.25417e-06	1.06209e-06	3.55967e-06	1.53595e-06	3.50339e-06	2.00531e-06	1.12186e-06	2.76311e-06	3.20013e-06	4.17996e-06	1.48704e-06	1.7143e-06	3.10615e-06	9.70285e-07	1.75426e-06	3.20568e-06	2.19577e-06	1.27287e-06
Alkalitalea	1.88897e-07	2.70001e-07	3.88346e-07	1.89078e-07	2.58433e-07	2.41925e-07	2.9487e-07	1.87567e-07	0	5.36506e-07	1.06149e-07	1.74394e-07	0	9.56597e-08	0	9.11976e-08	5.06193e-07	0	0	7.94494e-07	4.83552e-07	3.13301e-07	0	5.10452e-07
Alkanindiges	1.23742e-06	7.72568e-07	1.21509e-06	1.4966e-06	1.25696e-06	2.14421e-06	2.35195e-06	1.38865e-06	1.35719e-06	1.4417e-06	6.42586e-07	1.46348e-06	1.59576e-06	1.05829e-06	1.80828e-06	1.52917e-06	1.42092e-06	6.95162e-07	2.47841e-06	1.39494e-06	1.48539e-06	8.65643e-07	9.24265e-07	2.9153e-06
Allisonella	1.05303e-07	1.01129e-07	9.55928e-08	0	3.27972e-07	1.97896e-07	0	1.80787e-07	0	0	0	0	0	8.18293e-08	2.76405e-07	9.3536e-08	0	0	0	0	0	0	0	0
Alloactinosynnema	2.69338e-05	2.42484e-05	3.58914e-05	4.52401e-05	3.7114e-05	3.32418e-05	4.02949e-05	3.7429e-05	2.95597e-05	2.77079e-05	3.50848e-05	3.58475e-05	3.98651e-05	3.26391e-05	2.41881e-05	4.41419e-05	2.59305e-05	2.9015e-05	3.07851e-05	2.75075e-05	3.13426e-05	2.40382e-05	2.77463e-05	2.26872e-05
Allobacillus	0	9.94539e-07	1.06579e-06	0	1.04699e-07	2.37476e-07	1.89937e-07	5.77128e-08	0	1.16325e-07	4.6007e-08	1.20735e-07	4.8442e-07	0	6.68712e-07	1.14918e-07	4.23453e-07	1.22648e-07	2.45534e-07	0	0	0	1.29188e-07	7.38504e-08
Allobaculum	0	1.01129e-07	0	1.01843e-07	4.20976e-07	0	2.999e-07	0	0	0	0	0	0	0	0	0	0	0	0	0	0	0	0	0
Allobranchiibius	2.37633e-06	2.58672e-06	1.30425e-05	3.32303e-06	2.44422e-06	3.72135e-06	4.27399e-06	2.33044e-06	2.10818e-06	1.99198e-06	2.40842e-06	2.22063e-06	2.01424e-06	1.5491e-06	2.80214e-06	2.15733e-06	2.61654e-06	1.85034e-06	1.10488e-06	2.3944e-06	1.74727e-06	3.9576e-06	2.69853e-06	4.83828e-06
Allocatelliglobosispora	7.53149e-05	6.49241e-05	9.88973e-05	6.46047e-05	8.4296e-05	7.34495e-05	8.71949e-05	9.10352e-05	8.00534e-05	6.40966e-05	8.36705e-05	6.30087e-05	7.44096e-05	6.24197e-05	6.17246e-05	6.98744e-05	4.38048e-05	4.60286e-05	3.47285e-05	4.14552e-05	9.24629e-05	3.86072e-05	6.30544e-05	4.87359e-05
Allochromatium	1.57567e-05	1.44557e-05	1.61643e-05	1.41587e-05	1.4652e-05	1.21907e-05	1.51261e-05	1.17894e-05	1.50725e-05	1.29255e-05	1.36981e-05	1.38195e-05	1.2799e-05	1.11597e-05	1.22603e-05	1.07789e-05	6.94643e-06	1.32593e-05	1.25495e-05	1.10245e-05	1.01356e-05	9.53469e-06	1.02056e-05	1.49242e-05
Allofrancisella	2.95918e-07	3.26327e-07	7.24597e-07	3.21214e-07	3.44578e-07	1.73871e-07	5.36415e-07	2.67864e-07	1.06932e-07	0	0	2.73488e-07	0	0	2.99439e-07	0	0	6.26865e-07	0	0	0	0	3.28694e-07	5.33364e-07
Allokutzneria	1.19496e-05	2.01051e-05	2.39549e-05	1.41472e-05	2.32236e-05	2.03406e-05	2.03831e-05	2.13628e-05	1.6424e-05	1.71222e-05	1.57595e-05	1.24568e-05	1.13111e-05	1.39735e-05	1.83061e-05	2.46002e-05	1.79763e-05	2.15582e-05	1.48851e-05	1.45868e-05	1.18954e-05	1.10019e-05	1.3873e-05	1.09192e-05
Allomyces	0	3.15886e-07	9.79937e-08	1.67872e-07	6.91204e-07	7.64462e-07	6.75463e-08	2.13223e-06	2.2107e-06	1.68209e-06	5.14272e-07	3.71244e-06	1.9133e-06	4.95715e-06	1.88299e-06	2.27953e-06	3.76153e-06	4.25711e-06	4.84296e-06	5.93166e-06	5.53324e-07	1.12058e-05	6.51627e-06	1.51544e-06
Allonocardiopsis	1.18202e-05	1.65705e-05	1.00017e-05	1.33971e-05	1.77528e-05	2.19676e-05	2.60271e-05	2.3211e-05	1.3952e-05	1.59947e-05	1.23969e-05	1.06274e-05	1.8684e-05	1.48083e-05	9.00631e-06	1.54578e-05	9.11905e-06	9.87179e-06	9.31012e-06	9.95349e-06	7.51031e-06	7.62567e-06	9.71979e-06	1.06747e-05
Alloprevotella	8.26467e-07	1.21719e-06	1.21328e-06	1.20782e-06	3.28817e-07	3.88394e-07	3.63727e-07	8.78479e-07	1.53016e-06	5.65348e-07	5.6323e-07	9.23356e-07	5.82768e-07	2.56871e-07	1.13571e-06	1.30741e-06	5.74014e-07	1.13603e-06	1.63689e-07	7.58246e-07	1.46407e-06	6.38951e-07	1.33881e-06	2.29383e-06
Allopseudarcicella	2.77628e-07	3.59937e-07	1.06518e-07	3.98071e-07	1.88212e-07	1.85458e-07	1.11392e-07	6.03215e-07	1.07106e-06	1.09465e-06	2.02781e-07	2.52968e-07	6.55784e-07	1.37189e-06	7.7367e-07	5.24256e-07	2.27207e-07	2.59392e-07	3.96116e-07	4.67461e-07	5.22179e-08	2.88141e-07	4.5278e-07	5.97684e-07
Allorhizocola	7.39218e-05	7.40425e-05	7.76809e-05	7.9858e-05	6.24308e-05	5.67819e-05	7.28444e-05	7.27868e-05	0.000324003	7.63449e-05	0.000110794	0.00011688	0.000211094	0.000107048	0.000123781	0.000104814	7.95869e-05	0.000121217	4.58212e-05	8.0021e-05	0.000146262	9.26718e-05	8.12506e-05	8.46061e-05
Allosalinactinospora	4.45063e-06	6.71203e-06	5.25144e-06	5.8976e-06	6.68023e-06	5.97247e-06	6.66529e-06	5.6812e-06	3.52325e-06	7.59879e-06	7.81151e-06	5.64712e-06	3.51024e-06	4.06512e-06	6.27726e-06	4.96692e-06	6.57147e-06	5.46472e-06	7.11891e-06	4.58935e-06	6.32416e-06	5.10112e-06	6.65282e-06	7.45437e-06
Alloscardovia	0	4.99242e-07	0	0	0	0	0	0	1.13222e-07	0	0	0	6.59392e-07	0	0	0	0	0	0	0	0	0	0	0
Allostreptomyces	6.40874e-06	9.41931e-06	6.8629e-06	1.00405e-05	1.25438e-05	1.30972e-05	1.57279e-05	1.14385e-05	6.68512e-06	9.41645e-06	9.06283e-06	8.03319e-06	5.8401e-06	6.82049e-06	7.37729e-06	6.49727e-06	8.858e-06	9.16431e-06	5.21707e-06	6.90042e-06	9.55015e-06	5.92915e-06	1.18052e-05	5.55742e-06
Alphabaculovirus	1.69712e-07	7.65828e-08	7.23906e-07	1.54248e-07	1.32144e-07	0	0	0	0	0	0	0	0	0	0	0	0	0	0	0	0	0	0	0
Alphaentomopoxvirus	0	8.04693e-07	0	0	0	0	0	0	0	0	0	0	0	0	0	0	0	0	0	0	0	0	0	0
Alphafusellovirus	1.2486e-07	0	6.99821e-08	1.13482e-07	1.06991e-07	1.65385e-07	2.22783e-07	2.49196e-07	0	0	0	0	0	3.48299e-07	0	9.3536e-08	0	0	0	0	0	0	0	0
Alpharetrovirus	2.41086e-07	3.03386e-07	0	0	2.26847e-07	4.28775e-07	0	8.3363e-08	1.59576e-07	0	4.49946e-07	0	7.07484e-08	3.23224e-07	7.98504e-08	0	1.08216e-07	1.13975e-07	3.45751e-07	2.0117e-07	8.48541e-08	1.13692e-06	1.66454e-07	0
Alphatectivirus	0	0	0	0	0	0	0	0	7.12493e-06	4.14561e-08	4.00883e-08	0	0	7.22536e-08	0	0	6.95673e-08	0	0	5.56427e-08	0	0	0	0
Alpinimonas	0	0	3.06421e-07	3.26456e-07	0	1.05725e-07	1.06814e-07	4.16815e-07	0	9.61259e-07	9.2917e-07	0	4.79732e-07	0	0	0	0	0	3.22701e-07	9.24317e-07	2.52138e-07	1.14448e-07	2.30511e-07	1.27823e-06
Alsobacter	3.13138e-05	3.28603e-05	3.21734e-05	3.72567e-05	3.54185e-05	3.36526e-05	3.92278e-05	3.76193e-05	2.63395e-05	2.40865e-05	2.32314e-05	2.84031e-05	3.02375e-05	2.82412e-05	2.93294e-05	2.66694e-05	2.19874e-05	2.35702e-05	2.38638e-05	2.49184e-05	2.12009e-05	1.64781e-05	1.96471e-05	2.15499e-05
Altererythrobacter	0.00177047	0.00138341	0.000932318	0.00126042	0.0018507	0.00179866	0.00184889	0.00194759	0.00237345	0.00214124	0.00168575	0.00204932	0.00188129	0.00210052	0.00181442	0.00196689	0.00167104	0.00171906	0.00170893	0.00141292	0.00115986	0.000954957	0.00134455	0.00128469
Alteribacillus	1.72904e-06	2.36766e-06	1.32511e-06	1.11623e-06	2.20168e-06	2.79834e-06	2.69946e-06	1.47368e-06	2.26006e-06	1.29621e-06	5.67886e-07	1.70591e-06	1.01459e-06	8.06003e-07	2.21455e-06	1.58372e-06	1.9934e-06	1.69463e-06	2.88396e-06	1.58586e-06	9.72436e-07	9.45946e-07	7.81996e-07	4.81576e-07
Alterileibacterium	0	0	0	0	0	0	0	0	0	0	0	2.94751e-07	0	0	0	0	0	0	4.47236e-07	0	0	0	0	0
Alternaria	1.05303e-07	3.99394e-07	0	0	1.9282e-07	9.70812e-08	2.50676e-06	4.71866e-08	0	6.66133e-08	1.55218e-07	8.40455e-08	2.4385e-07	7.18233e-07	4.36279e-07	8.90804e-07	0	0	0	4.54819e-07	0	1.29901e-06	5.67736e-07	0
Alteromonas	1.89528e-05	1.99656e-05	2.66478e-05	2.43339e-05	1.55881e-05	1.65082e-05	2.44787e-05	1.66107e-05	2.3207e-05	2.10771e-05	1.94523e-05	2.09155e-05	2.32891e-05	1.97263e-05	2.0824e-05	2.33534e-05	2.16877e-05	2.63372e-05	2.4502e-05	3.0178e-05	2.32771e-05	1.66983e-05	1.68608e-05	1.58713e-05
Altibacter	1.38155e-06	8.08734e-07	1.71303e-06	2.35979e-06	2.29966e-06	1.12149e-06	8.7871e-07	1.84674e-06	8.33736e-07	1.3794e-06	9.72858e-07	1.28645e-06	7.8711e-07	7.29027e-07	5.10497e-07	2.48615e-06	1.22026e-06	1.9483e-06	1.48495e-06	1.08451e-06	1.44789e-06	1.05436e-06	2.33936e-07	1.19115e-06
Alysiella	0	1.59354e-07	0	0	0	6.35597e-07	0	8.82667e-08	0	2.36174e-07	7.5366e-08	2.09273e-07	0	0	0	0	0	0	0	0	0	0	0	0
Amanita	1.61855e-07	1.12577e-06	6.90392e-08	1.35427e-06	3.03386e-07	1.57509e-07	0	5.63639e-07	2.96219e-07	1.1872e-06	9.66231e-08	1.55464e-06	7.97027e-07	1.78377e-06	7.26154e-07	8.46433e-07	1.3734e-06	1.75046e-06	1.39328e-06	2.34164e-06	2.19678e-06	4.27997e-06	2.92403e-06	6.66115e-07
Amantichitinum	8.10568e-06	7.69892e-06	9.27688e-06	8.4349e-06	1.085e-05	8.27493e-06	1.14714e-05	9.39033e-06	5.71653e-06	5.49568e-06	6.57648e-06	6.49205e-06	6.90769e-06	7.54008e-06	6.04676e-06	6.20571e-06	6.9841e-06	8.80302e-06	6.51133e-06	6.12892e-06	6.20941e-06	6.84473e-06	9.24041e-06	1.27908e-05
Amaricoccus	9.42802e-06	1.49271e-05	1.1529e-05	1.01402e-05	1.05123e-05	1.03168e-05	9.56251e-06	9.42821e-06	1.08566e-05	1.21646e-05	1.06014e-05	1.07392e-05	9.30851e-06	1.02005e-05	1.1097e-05	1.18345e-05	1.25508e-05	1.3442e-05	1.0134e-05	1.08053e-05	1.19052e-05	6.8425e-06	1.24154e-05	1.16343e-05
Amedibacterium	7.40993e-08	0	2.96927e-06	9.31819e-08	0	0	0	0	2.28687e-07	0	0	0	0	0	0	0	0	4.23134e-07	7.05909e-07	0	0	0	8.56992e-08	0
Ameyamaea	1.08306e-06	1.62786e-06	5.30905e-07	5.53124e-07	1.2356e-06	8.46507e-07	7.27064e-07	1.02945e-06	1.01752e-06	1.11602e-06	8.96015e-07	1.07787e-06	1.29135e-06	8.36371e-07	1.22642e-06	1.42878e-06	1.42955e-06	2.57711e-07	1.15527e-06	1.6422e-06	1.93439e-06	7.87111e-07	1.12379e-06	1.25214e-06
Amigovirus	0	0	3.3892e-07	0	0	0	0	0	0	0	4.07384e-07	0	0	0	0	0	0	0	0	0	5.93846e-07	3.53015e-07	7.03709e-08	0
Aminicella	0	0	0	9.23692e-08	0	0	0	0	0	0	0	0	0	0	0	0	0	9.1843e-07	0	0	0	0	0	3.34903e-07
Aminiphilus	1.70078e-06	2.22082e-06	1.1384e-06	1.78018e-06	2.25574e-06	1.97066e-06	2.26307e-06	1.786e-06	8.46213e-07	2.21158e-06	2.83949e-06	1.21185e-06	6.31689e-07	2.49901e-06	6.75923e-07	1.30436e-06	1.11502e-06	1.87749e-06	1.5645e-06	5.39707e-07	1.09389e-06	1.3819e-06	1.00566e-06	1.65371e-06
Aminipila	1.25588e-07	0	9.90675e-07	1.13936e-06	1.81478e-07	9.18805e-08	0	0	0	0	1.03241e-07	2.81579e-07	0	1.6171e-07	3.82461e-07	9.99426e-08	0	0	0	0	0	2.17005e-07	3.37232e-07	0
Aminivibrio	1.31822e-07	4.45244e-07	8.83011e-07	1.16683e-06	1.801e-06	7.10761e-07	8.13796e-07	9.45364e-07	3.10527e-07	9.10097e-07	5.37039e-07	1.14503e-06	8.80294e-07	5.57692e-07	9.20668e-07	2.21589e-06	4.2598e-07	1.13969e-06	2.90033e-07	7.98801e-07	8.13043e-07	1.97565e-07	5.09215e-07	6.98017e-07
Aminobacter	3.79204e-05	3.46269e-05	4.71056e-05	3.82449e-05	3.21283e-05	3.1671e-05	3.29836e-05	3.33903e-05	3.68633e-05	3.20696e-05	4.54336e-05	3.07336e-05	3.59833e-05	3.51125e-05	3.36649e-05	3.15631e-05	5.19114e-05	5.42942e-05	4.55737e-05	3.81187e-05	4.31658e-05	3.03519e-05	4.26856e-05	4.63819e-05
Aminobacterium	3.61603e-07	7.29297e-07	3.28952e-07	1.40686e-06	3.61761e-07	8.03954e-08	1.87035e-07	9.03263e-07	0	6.3283e-07	1.199e-06	5.07901e-07	3.11546e-07	4.46831e-07	9.79286e-07	1.65814e-07	6.3243e-08	1.58927e-06	0	1.12387e-06	8.86838e-07	3.6115e-07	5.40976e-07	1.03356e-06
Aminomonas	1.026e-06	5.63565e-07	4.32452e-06	9.00332e-07	9.23195e-07	1.25505e-06	5.3674e-07	1.18113e-06	5.15512e-07	2.06048e-06	9.13518e-07	6.57111e-07	5.32711e-07	1.06442e-06	7.67454e-07	1.31852e-06	1.40881e-06	5.79157e-07	1.17652e-07	1.15479e-06	6.0444e-07	7.5205e-07	2.93824e-07	1.41754e-06
Ammonifex	5.10673e-06	5.81736e-06	6.05404e-06	5.83749e-06	5.10447e-06	5.86305e-06	8.64965e-06	4.42685e-06	5.74673e-06	5.33949e-06	5.44788e-06	5.86375e-06	6.78528e-06	6.73003e-06	7.84851e-06	4.76198e-06	5.27941e-06	5.55828e-06	2.40841e-06	4.91652e-06	4.30881e-06	1.76694e-06	5.06457e-06	3.99573e-06
Ammoniphilus	4.38206e-06	3.99095e-06	4.70787e-06	6.41224e-06	4.40409e-06	3.36736e-06	3.20552e-06	2.95568e-06	3.49014e-06	3.92662e-06	5.06315e-06	3.76454e-06	4.25292e-06	3.28211e-06	3.78361e-06	4.44469e-06	3.05292e-06	2.70632e-06	3.00113e-06	2.38868e-06	3.02691e-06	2.7032e-06	2.7882e-06	4.07652e-06
Amnibacterium	3.4318e-06	5.66981e-06	6.42109e-06	4.93377e-06	7.04793e-06	4.98434e-06	7.74584e-06	8.90119e-06	3.68702e-06	6.6738e-06	4.52778e-06	4.82508e-06	3.77245e-06	4.53558e-06	4.28354e-06	4.85857e-06	3.47856e-06	5.37291e-06	2.19052e-06	2.41838e-06	4.38788e-06	3.08145e-06	3.75396e-06	5.55908e-06
Amniculibacterium	5.94755e-07	2.26345e-07	0	2.23345e-07	4.42637e-07	0	1.18439e-07	7.57845e-08	2.85153e-07	1.04466e-07	0	1.3415e-07	6.66711e-07	2.51627e-07	9.71153e-08	2.84252e-07	3.60831e-07	3.25488e-07	8.08771e-07	1.05665e-07	1.73994e-07	1.27446e-06	2.67699e-07	2.26712e-07
Amniculicola	1.28532e-07	0	9.09297e-08	0	0	0	0	1.10333e-07	0	7.04457e-07	2.11307e-07	4.20248e-08	1.03001e-07	2.07224e-07	8.76407e-08	7.32721e-07	9.21296e-07	0	0	5.86589e-07	0	0	0	0
Amnimonas	5.48852e-07	8.00741e-07	5.94661e-07	2.84253e-07	3.72899e-07	6.88424e-07	4.82399e-07	4.22686e-07	1.14557e-06	4.96091e-07	5.55639e-07	3.62964e-07	1.16231e-06	4.33548e-07	1.13877e-06	1.13997e-07	4.9189e-07	1.17537e-07	4.18316e-07	1.46266e-06	5.0975e-07	8.7028e-08	0	0
Amorphotheca	2.57064e-07	6.52393e-07	0	0	0	0	6.64445e-07	1.10333e-07	0	0	0	0	0	3.05693e-07	1.05684e-07	0	0	0	1.5472e-07	0	0	0	0	0
Amorphus	4.46652e-06	5.31831e-06	5.63113e-06	7.38632e-06	5.86447e-06	4.48542e-06	5.36899e-06	5.34832e-06	4.50308e-06	7.44547e-06	7.51155e-06	6.12592e-06	5.16531e-06	4.11863e-06	8.5469e-06	4.10666e-06	9.56636e-06	1.6237e-05	8.74394e-06	1.13183e-05	6.24177e-06	4.0856e-06	4.64206e-06	3.79057e-06
Ampelomyces	0	0	4.6312e-08	0	4.22696e-08	0	6.82273e-07	0	4.78207e-08	0	0	0	0	8.43706e-08	0	0	0	0	0	3.89845e-07	0	1.47063e-07	5.37616e-08	0
Ampelovirus	0	0	0	0	0	0	0	0	7.69913e-08	7.79375e-08	0	6.97578e-08	0	1.35837e-07	0	2.91832e-07	0	0	0	0	0	3.34188e-07	1.73112e-07	9.60055e-08
Amphiamblys	0	5.63431e-07	1.08061e-07	0	0	0	1.2228e-06	8.11099e-07	1.49983e-07	3.20291e-07	0	3.5946e-07	7.37273e-08	7.58022e-07	2.55448e-07	0	1.0252e-07	0	0	1.14263e-06	4.58432e-07	6.62168e-07	3.45347e-07	0
Amphibacillus	0	0	0	5.03104e-07	0	0	0	1.08734e-07	3.2187e-07	4.12713e-07	8.36215e-07	2.02196e-07	0	0	0	2.03014e-07	0	6.01791e-07	0	7.45397e-07	0	4.57791e-07	0	0
Amphiplicatus	6.74749e-06	5.08897e-06	7.95555e-06	7.94667e-06	7.35902e-06	7.7589e-06	1.51751e-05	1.11796e-05	6.73175e-06	7.69763e-06	8.83179e-06	7.26482e-06	7.04368e-06	8.0323e-06	6.3307e-06	7.95971e-06	1.07876e-05	1.08643e-05	7.28265e-06	4.49521e-06	6.03342e-06	4.62624e-06	8.30069e-06	7.412e-06
Amphritea	6.28337e-06	4.84533e-06	4.31032e-06	4.52998e-06	2.71371e-06	2.67426e-06	4.32463e-06	2.20824e-06	4.02568e-06	3.07956e-06	5.28237e-06	5.0499e-06	4.57528e-06	4.08624e-06	5.2902e-06	5.23659e-06	3.19401e-06	4.46338e-06	7.70213e-06	2.97761e-06	2.44014e-06	2.14081e-06	4.50208e-06	3.74217e-06
Ampunavirus	0	0	0	0	0	0	9.62643e-08	6.76955e-07	0	0	0	0	0	2.16761e-07	0	0	0	1.20038e-07	0	4.72356e-07	9.24974e-07	8.03335e-08	1.84162e-07	2.76939e-07
Amycolatopsis	0.000436957	0.000496617	0.00107721	0.00294487	0.000596873	0.00098794	0.000634198	0.000652581	0.00053019	0.000646747	0.000502191	0.000572127	0.000528617	0.00050123	0.000451371	0.000858077	0.000371647	0.000987307	0.000375269	0.000796943	0.000337593	0.000307953	0.000576614	0.000438374
Amylibacter	8.22274e-07	9.11548e-07	1.16459e-06	7.78038e-07	2.2161e-06	2.22056e-06	7.8233e-07	9.5379e-07	6.90256e-07	6.53465e-07	1.46683e-06	1.01115e-06	2.43234e-07	1.14832e-06	1.08584e-07	5.95531e-07	1.4729e-06	1.30911e-06	2.46655e-06	1.03367e-06	5.71803e-07	7.20866e-07	1.48356e-06	1.23391e-06
Anabaena	4.25582e-05	4.48535e-05	4.3493e-05	4.93249e-05	4.93109e-05	4.88447e-05	5.84199e-05	4.25607e-05	4.14631e-05	4.12418e-05	4.54633e-05	4.40317e-05	3.87552e-05	3.7329e-05	3.69313e-05	3.90426e-05	3.95808e-05	3.81712e-05	3.13272e-05	3.56417e-05	3.95993e-05	3.39257e-05	3.44959e-05	4.186e-05
Anabaenopsis	5.18051e-06	6.13329e-06	6.45505e-06	6.0718e-06	7.25757e-06	5.0786e-06	8.5006e-06	6.18179e-06	5.02274e-06	5.1804e-06	4.88308e-06	7.05513e-06	5.70631e-06	4.04145e-06	5.74613e-06	5.8236e-06	8.78322e-06	7.8047e-06	7.5134e-06	6.41428e-06	9.21862e-06	5.13116e-06	6.08972e-06	6.51123e-06
Anaeroarcus	0	0	1.0076e-07	4.0271e-07	0	6.48295e-07	5.79059e-07	1.82992e-07	7.69913e-07	3.34018e-07	2.07169e-07	8.50704e-08	2.57164e-07	1.65655e-07	7.39841e-07	5.02038e-07	0	0	0	0	0	5.01037e-07	0	0
Anaerobacillus	1.94572e-06	1.80329e-06	2.66625e-06	2.34592e-06	1.77969e-06	2.35243e-06	2.49974e-06	1.8585e-06	9.55303e-07	1.45189e-06	8.72387e-07	1.80401e-06	1.85481e-06	1.23895e-06	1.46913e-06	1.92175e-06	1.35783e-06	1.76997e-07	3.09057e-06	8.35053e-07	1.08983e-06	1.01089e-06	1.37888e-06	1.60046e-06
Anaerobacterium	2.35079e-06	2.6506e-06	2.72685e-06	4.09886e-06	2.39417e-06	1.85976e-06	2.74414e-06	2.41395e-06	1.79235e-06	3.02329e-06	2.69444e-06	2.70785e-06	2.24455e-06	2.47877e-06	2.98224e-06	4.2153e-06	3.38585e-06	1.22375e-06	8.58875e-07	1.31004e-06	1.94599e-06	1.98041e-06	2.30785e-06	1.72797e-06
Anaerobiospirillum	0	0	0	2.26964e-07	2.32003e-07	0	0	0	8.74901e-08	2.22679e-07	0	0	1.00058e-07	0	4.71325e-07	2.87993e-07	0	6.44776e-07	1.28347e-07	0	0	3.12989e-07	4.1873e-07	0
Anaerobium	9.93202e-08	3.31745e-07	0	0	0	0	2.75441e-08	9.74373e-08	0	0	1.71286e-07	5.09461e-07	5.00292e-07	6.29171e-07	2.01305e-07	1.6874e-07	0	0	0	0	1.03821e-07	0	2.24821e-07	3.50578e-07
Anaerobranca	5.50778e-07	1.02755e-06	4.75379e-07	9.45887e-07	6.77433e-07	5.64005e-07	1.01045e-06	7.08234e-07	2.43748e-07	6.56702e-07	1.26666e-07	3.9356e-07	8.70776e-07	3.94782e-06	1.49849e-07	1.22806e-06	1.07933e-06	1.42227e-06	7.18896e-07	2.90579e-07	1.1123e-06	2.15509e-07	3.21208e-07	2.901e-07
Anaerobutyricum	1.18111e-07	0	0	0	0	0	0	0	0	0	0	0	0	0	0	0	0	0	0	0	0	4.51605e-07	0	0
Anaerococcus	5.98784e-07	2.04986e-07	9.79816e-07	1.05943e-06	2.65146e-07	8.12086e-07	1.13006e-07	6.14973e-08	2.35097e-07	6.13681e-08	3.85461e-07	3.57594e-07	4.55039e-07	3.18184e-07	8.84484e-07	8.82479e-07	0	7.13813e-07	0	1.50957e-06	1.27896e-07	1.21082e-07	1.08532e-06	2.4557e-07
Anaerocolumna	2.2899e-06	2.15676e-06	2.2554e-06	2.09759e-06	2.79221e-06	1.75251e-06	1.18899e-06	1.29828e-06	2.20706e-06	1.95696e-06	2.17698e-06	2.55021e-06	2.4052e-06	2.79458e-06	2.72057e-06	2.73443e-06	1.1772e-06	5.15404e-07	7.10278e-07	8.59054e-07	1.84198e-06	1.70477e-06	7.67464e-07	2.2621e-06
Anaerofilum	0	1.4744e-07	6.7784e-07	4.08695e-07	1.27204e-07	3.60652e-07	5.27601e-07	9.49705e-08	0	9.99199e-08	0	0	7.50889e-07	5.43248e-07	2.01492e-07	0	0	0	1.32058e-06	0	0	1.07111e-07	0	2.43052e-07
Anaerofustis	1.04967e-07	3.82914e-08	3.77466e-07	3.30128e-07	3.3036e-08	5.45226e-07	2.94322e-07	0	7.65302e-07	5.89185e-07	1.11568e-06	1.22378e-06	3.57484e-07	3.94245e-07	5.00209e-07	1.21247e-06	9.10226e-08	0	1.05556e-07	0	1.6495e-07	1.56162e-07	1.1389e-07	0
Anaeroglobus	0	0	0	9.23692e-08	4.47724e-07	8.97437e-08	0	2.05553e-07	0	9.0625e-08	3.97358e-07	0	0	7.10774e-07	0	0	0	0	2.62664e-07	0	0	0	0	0
Anaerohalosphaera	7.06757e-06	7.24666e-06	7.18237e-06	8.01773e-06	9.40622e-06	8.83119e-06	9.24784e-06	8.32354e-06	6.88952e-06	5.98734e-06	6.74241e-06	7.46261e-06	9.22705e-06	9.75218e-06	9.39004e-06	9.37304e-06	3.2355e-06	5.48813e-06	4.60463e-06	5.91402e-06	3.16654e-06	3.8486e-06	3.54977e-06	5.02418e-06
Anaerolactibacter	7.04853e-08	2.88206e-07	0	1.45121e-07	0	1.86725e-07	0	1.53116e-07	7.85625e-08	0	2.30712e-07	0	2.14411e-07	5.47729e-08	3.46086e-07	0	0	0	0	0	0	0	0	0
Anaerolinea	0.000482748	0.000560348	0.000439504	0.000459015	0.000556833	0.000575603	0.000473638	0.000521482	0.00060684	0.000654664	0.000699807	0.000651448	0.000588296	0.000475981	0.000630484	0.000580768	0.0012384	0.00132763	0.00127719	0.0010964	0.000630181	0.000500407	0.000522936	0.000716575
Anaeromassilibacillus	3.4701e-07	8.44283e-07	2.84358e-07	7.48885e-07	5.71883e-08	0	7.59394e-07	0	7.05283e-07	9.16912e-08	3.54663e-07	2.7536e-07	1.20635e-06	3.60607e-07	1.90782e-07	4.84865e-07	4.73855e-07	0	4.03866e-07	2.34576e-07	8.02257e-08	4.05742e-07	1.28759e-06	2.08804e-07
Anaeromicrobium	5.41962e-07	3.48001e-07	8.98501e-07	3.69923e-07	7.87539e-07	5.77323e-07	2.83221e-07	5.68384e-08	5.14648e-07	1.38572e-07	0	8.64578e-07	9.94846e-07	3.53543e-07	1.01004e-06	2.89769e-07	5.70831e-07	7.90395e-07	1.35767e-06	5.75496e-07	3.33829e-07	6.62508e-07	4.24588e-07	4.17415e-07
Anaeromusa	5.67064e-07	9.70279e-07	8.64591e-07	1.00554e-07	8.72488e-08	4.08782e-07	9.62602e-07	0	4.9193e-07	0	1.03577e-06	1.11091e-06	1.10248e-07	1.4635e-06	4.41759e-07	9.68807e-07	1.02047e-06	0	0	2.64831e-07	1.14608e-07	5.13253e-07	0	9.12875e-07
Anaeromyces	2.72287e-07	4.90303e-07	6.58199e-07	6.42397e-07	5.92509e-07	3.02141e-07	9.55896e-07	9.15742e-07	1.15142e-06	3.67692e-07	1.41574e-06	2.07452e-06	9.2819e-07	2.20756e-06	8.46379e-07	1.27537e-06	3.66338e-07	1.17645e-06	2.29268e-06	1.21741e-06	1.03506e-06	4.57586e-06	3.17754e-06	5.02589e-07
Anaeromyxobacter	0.000431447	0.00054241	0.000464087	0.000517976	0.000523872	0.000488382	0.000537321	0.000481305	0.000352895	0.000338519	0.000332527	0.000357144	0.000525329	0.000475924	0.000558827	0.000523072	0.000278785	0.000286244	0.000229013	0.000228144	0.000293441	0.000239667	0.000314812	0.000299182
Anaerophaga	1.56208e-06	1.37751e-06	1.54506e-06	1.55459e-06	1.05405e-06	9.85907e-07	1.17855e-06	1.81493e-06	9.02356e-07	1.19445e-06	2.15179e-06	1.25326e-06	1.92993e-06	2.16457e-07	1.30849e-06	1.7564e-06	5.84997e-07	1.54128e-06	4.84052e-07	7.89713e-07	1.6668e-06	1.4953e-06	1.51853e-07	1.36234e-06
Anaeroplasma	0	6.85916e-08	4.53858e-07	8.61379e-08	0	0	0	0	0	0	6.55356e-08	2.42636e-07	0	2.95297e-07	4.21881e-07	6.34418e-08	3.38762e-07	0	0	0	0	0	0	0
Anaerorhabdus	0	0	9.68342e-08	0	3.53528e-07	1.00233e-07	0	9.74373e-08	0	0	0	9.05945e-08	0	0	1.86663e-07	0	0	0	4.56345e-07	0	0	4.3401e-07	5.27543e-07	1.24682e-07
Anaerosacchariphilus	0	2.74585e-07	0	0	0	4.44648e-07	6.72191e-08	0	0	0	0	0	3.80657e-07	0	0	2.37907e-07	0	0	0	0	0	0	0	0
Anaerosalibacter	4.20651e-07	2.79079e-07	3.3892e-07	9.26755e-07	3.01389e-07	7.68119e-07	4.42236e-07	0	3.17338e-07	5.18328e-07	7.81798e-07	2.5414e-07	1.02368e-06	2.5606e-08	3.24957e-07	1.28368e-06	2.07222e-07	3.07345e-07	1.20155e-07	9.16308e-07	2.61302e-07	3.40376e-07	0	2.84272e-07
Anaerosolibacter	6.98796e-07	1.56362e-06	1.58056e-06	2.17946e-06	2.39515e-06	1.81182e-06	2.49826e-06	1.62883e-06	1.32437e-06	1.96198e-06	1.79495e-06	2.35176e-06	2.11841e-06	1.57052e-06	2.8165e-06	1.58064e-06	8.06614e-07	8.20267e-07	2.02102e-06	9.05697e-07	1.12925e-06	6.75308e-07	1.27619e-06	1.05428e-06
Anaerosphaera	1.27039e-07	0	0	0	1.49569e-07	4.24064e-07	0	0	1.80612e-07	3.95124e-07	2.67255e-08	0	5.38776e-07	1.85795e-07	1.27421e-07	1.60347e-07	1.3687e-07	9.80091e-07	1.20155e-07	2.16761e-07	2.64901e-07	5.25753e-07	3.07305e-07	4.79006e-07
Anaerospora	4.03179e-07	1.34083e-06	1.49729e-06	2.57531e-07	8.73847e-07	4.9246e-07	1.34676e-06	8.89749e-07	1.28757e-07	5.76038e-07	9.16019e-07	7.9195e-07	1.192e-06	1.08808e-06	8.19289e-07	9.45172e-07	1.63688e-07	9.89787e-08	7.6346e-07	5.54173e-07	5.91621e-07	5.98552e-07	8.63947e-07	1.03677e-06
Anaerosporobacter	7.40906e-07	0	1.92834e-07	2.87124e-07	1.63986e-07	6.03296e-07	5.6503e-07	2.07509e-07	1.60399e-07	1.34375e-07	0	3.0068e-07	3.08674e-07	0	1.066e-07	0	8.35618e-07	3.32347e-07	0	0	7.60761e-08	3.63247e-07	1.80325e-07	3.31053e-07
Anaerosporomusa	6.99214e-07	1.13579e-06	2.39016e-06	1.61658e-06	1.78818e-06	7.58843e-07	7.25289e-07	1.06196e-06	7.82846e-07	1.97972e-06	3.57708e-06	9.54211e-07	2.00764e-06	9.71216e-07	2.04622e-06	1.17137e-06	2.32584e-06	1.91634e-06	1.06304e-06	1.42217e-06	1.546e-06	5.98734e-07	9.54908e-07	3.10242e-06
Anaerostipes	3.0504e-07	1.6098e-07	1.05017e-07	2.30254e-07	2.77772e-07	0	3.39018e-07	2.6185e-07	0	0	1.09226e-07	0	7.51948e-07	0	5.42163e-07	0	0	6.09923e-07	0	0	9.00492e-08	8.52519e-08	0	0
Anaerotignum	3.17849e-07	2.10566e-07	0	2.88406e-07	6.41674e-07	0	1.85339e-07	0	1.94915e-07	5.75478e-07	4.22417e-07	6.69539e-07	5.98128e-07	1.5202e-06	1.77684e-06	4.41623e-07	1.23284e-07	3.59584e-07	9.59284e-07	1.57306e-07	8.43551e-07	7.29286e-07	6.50798e-08	0
Anaerotruncus	1.61341e-06	3.61747e-06	3.48134e-06	2.31626e-06	3.12704e-06	2.64754e-06	1.09058e-06	1.2266e-06	2.31996e-06	2.00716e-06	1.49192e-06	1.46251e-06	2.49535e-06	1.29787e-06	2.09971e-06	1.75517e-06	3.43607e-06	3.65092e-06	2.1955e-06	2.1149e-06	4.20419e-06	1.30701e-06	5.22246e-06	2.26326e-06
Anaerovibrio	5.01902e-07	1.19288e-06	7.9567e-07	6.76505e-07	1.68447e-06	1.42739e-06	1.23234e-06	9.26083e-07	2.21593e-07	1.21354e-06	5.63431e-07	7.62575e-07	4.25685e-07	7.4677e-07	3.96535e-07	1.18232e-06	1.0252e-07	5.93872e-08	2.85938e-07	0	0	7.88178e-08	0	6.73478e-07
Anaerovirgula	2.94404e-07	5.2489e-07	3.7946e-07	1.96142e-07	9.8576e-08	2.63412e-08	5.21566e-08	2.50925e-08	3.76444e-07	4.26348e-07	1.6514e-06	6.82535e-07	2.45604e-07	7.65077e-07	3.89744e-07	3.87969e-07	2.1796e-07	7.7021e-08	0	1.39944e-07	9.03566e-08	3.94934e-07	5.78971e-08	1.88434e-07
Anaerovorax	0	0	0	0	0	0	0	0	0	0	0	0	0	0	0	0	0	0	0	0	0	0	0	4.11452e-07
Anaplasma	2.0203e-06	6.05604e-07	1.85152e-06	1.38566e-06	8.16296e-07	2.72845e-06	1.84664e-06	9.37991e-07	3.29954e-06	1.13974e-06	4.90781e-07	1.2338e-06	7.77918e-07	1.86085e-06	1.34208e-06	9.65439e-07	1.9748e-06	3.64109e-07	1.60086e-06	2.99135e-06	2.00714e-05	3.07099e-06	1.09238e-06	1.59301e-06
Ancrocorticia	1.64866e-07	0	0	4.68183e-07	7.56157e-08	8.57551e-08	3.99867e-07	0	3.34745e-07	0	8.374e-08	0	0	3.81327e-07	1.04153e-07	0	1.41151e-07	8.74696e-08	7.21596e-07	4.29786e-07	0	3.23825e-07	9.61735e-08	3.20018e-07
Ancylobacter	2.88718e-05	2.7566e-05	2.78961e-05	3.42583e-05	2.04207e-05	2.07459e-05	1.91839e-05	2.34781e-05	3.65371e-05	3.06125e-05	3.44513e-05	2.83481e-05	3.39911e-05	3.13847e-05	3.24192e-05	2.73067e-05	4.56521e-05	4.22153e-05	4.24025e-05	4.06489e-05	3.49412e-05	2.70572e-05	3.18771e-05	3.8535e-05
Ancylomarina	1.32256e-06	1.13504e-06	4.44824e-06	2.56482e-06	2.69186e-06	2.86997e-06	1.96874e-06	1.34121e-06	1.5836e-06	2.15217e-06	1.1256e-06	3.33334e-06	4.17552e-06	1.90178e-06	1.81645e-06	2.42415e-06	7.88814e-06	3.722e-06	2.54448e-06	1.40575e-06	2.42275e-06	1.42611e-06	9.10441e-07	1.27081e-06
Anderseniella	4.10981e-06	3.43856e-06	3.36155e-06	7.05522e-06	2.43408e-06	2.76803e-06	1.04414e-06	2.64038e-06	3.68987e-06	1.57057e-06	4.82594e-06	4.31879e-06	2.14036e-06	3.14723e-06	4.58158e-06	2.30826e-06	6.92703e-06	4.45917e-06	4.17226e-06	7.09046e-06	5.52764e-06	3.0104e-06	3.91155e-06	3.7642e-06
Andhravirus	0	0	0	0	0	0	0	0	1.18207e-06	1.44329e-07	0	7.48058e-07	2.86008e-07	0	0	4.83214e-07	0	0	0	1.4944e-07	0	0	0	0
Anditalea	2.14149e-06	1.41105e-06	1.91239e-06	1.07746e-06	1.23647e-06	1.6128e-06	1.82621e-06	1.50906e-06	1.75637e-06	1.18633e-06	2.47997e-06	1.61963e-06	7.94178e-07	1.00638e-06	1.6553e-06	2.44851e-06	1.86935e-06	9.74276e-07	1.23709e-06	1.3839e-06	1.42788e-06	7.43466e-07	3.00284e-06	2.05313e-06
Andreesenia	0	4.86915e-07	0	0	0	2.93087e-07	0	3.08329e-07	0	1.27587e-07	0	0	0	0	0	0	0	0	0	0	0	0	0	0
Andreprevotia	3.58264e-05	3.56103e-05	3.97641e-05	2.96478e-05	3.88418e-05	3.48575e-05	4.46353e-05	4.24263e-05	3.17331e-05	2.85857e-05	2.87622e-05	3.21275e-05	3.43563e-05	2.86971e-05	2.96005e-05	3.32954e-05	3.08189e-05	3.1539e-05	2.86342e-05	2.60693e-05	3.25133e-05	2.50525e-05	2.28106e-05	3.22166e-05
Andrewvirus	0	0	0	0	0	0	0	0	0	0	0	3.67146e-07	0	0	0	0	0	0	0	0	0	0	0	0
Aneurinibacillus	1.57492e-05	1.69305e-05	1.7827e-05	1.75148e-05	1.35665e-05	1.78252e-05	1.66034e-05	1.74595e-05	1.86088e-05	1.10121e-05	9.84285e-06	1.28247e-05	1.46586e-05	1.57241e-05	1.48719e-05	1.81674e-05	1.27896e-05	8.86379e-06	1.02966e-05	1.13765e-05	9.08758e-06	1.07378e-05	8.76757e-06	1.27472e-05
Angelakisella	2.87344e-07	4.18341e-07	8.77204e-08	1.35492e-07	3.39145e-07	1.6119e-07	3.14412e-07	0	6.58432e-07	4.10482e-07	8.86659e-08	1.88534e-07	0	1.25704e-07	2.34645e-07	9.8592e-08	3.94841e-07	4.2989e-07	0	1.41363e-07	1.03821e-07	0	1.01831e-07	0
Angulomicrobium	4.48931e-06	4.79294e-06	6.10703e-06	5.95573e-06	4.7093e-06	3.40562e-06	6.99248e-06	6.81533e-06	6.84368e-06	6.74636e-06	8.9199e-06	4.37198e-06	7.08795e-06	4.92743e-06	5.75632e-06	6.14934e-06	8.32977e-06	7.68692e-06	1.01019e-05	6.16362e-06	4.38374e-06	4.5189e-06	6.13492e-06	6.10053e-06
Angustibacter	4.45626e-05	5.56657e-05	5.31734e-05	6.91118e-05	6.53624e-05	6.32777e-05	8.2427e-05	4.86322e-05	3.24528e-05	5.3777e-05	3.84706e-05	3.80652e-05	5.89943e-05	4.93759e-05	7.94912e-05	4.08719e-05	0.000120073	0.000142215	8.14153e-05	0.000136178	0.000327114	0.000271133	0.000488782	0.000371793
Anncaliia	0	0	0	4.74242e-07	0	4.04889e-07	0	0	0	0	0	0	0	0	0	0	0	0	0	0	6.15685e-07	0	0	0
Annulohypoxylon	0	0	1.9451e-07	0	0	3.08718e-07	4.15862e-07	0	6.60563e-07	2.88657e-07	1.96607e-07	1.81977e-07	0	9.84324e-08	0	0	0	9.8118e-08	2.61902e-07	5.45783e-07	0	7.26495e-08	0	0
Anoxybacillus	4.0531e-06	5.55534e-06	4.13058e-06	4.75579e-06	5.4678e-06	5.294e-06	6.05303e-06	6.09515e-06	4.22881e-06	7.11484e-06	9.47622e-06	7.24628e-06	4.65948e-06	4.60855e-06	7.26085e-06	3.77738e-06	3.84457e-06	4.10055e-06	4.69823e-06	4.21162e-06	5.78735e-06	3.42495e-06	6.83385e-06	5.09791e-06
Anoxybacter	1.6704e-06	1.55538e-06	1.66637e-06	2.05107e-06	2.73474e-06	3.09242e-06	1.58821e-06	4.19821e-06	1.77298e-06	1.97973e-06	4.78866e-06	2.05809e-06	3.40284e-06	2.32784e-06	3.90943e-06	3.01825e-06	6.13645e-07	1.38519e-06	2.26503e-06	3.22899e-06	2.0264e-06	2.32996e-06	2.04922e-06	4.30187e-06
Anseongella	7.01794e-06	7.4628e-06	1.07488e-05	8.17159e-06	8.8741e-06	9.88597e-06	8.25644e-06	8.83558e-06	5.76788e-06	9.55725e-06	8.69724e-06	9.33438e-06	8.47899e-06	8.12403e-06	8.0366e-06	8.39021e-06	8.79773e-06	1.00024e-05	1.17543e-05	1.0218e-05	1.55244e-05	1.10077e-05	8.7457e-06	1.10262e-05
Antarcticibacterium	1.95811e-06	2.08539e-06	4.1203e-06	2.62083e-06	1.5039e-06	3.2902e-06	3.16142e-06	1.77049e-06	5.75829e-07	1.60035e-06	2.61858e-06	2.51972e-06	3.69805e-06	2.22715e-06	1.8522e-06	2.39104e-06	1.46733e-06	1.87186e-06	4.10823e-06	3.2442e-06	1.88479e-06	6.38226e-07	2.86335e-06	2.2577e-06
Antarctobacter	1.54043e-06	7.20167e-07	1.22863e-06	1.16638e-06	1.47871e-06	1.18769e-06	1.36679e-06	2.68292e-06	6.16425e-07	7.34854e-07	2.60936e-06	1.38383e-06	1.36288e-06	1.15305e-06	1.29835e-06	9.4889e-07	1.72378e-06	2.44032e-06	1.29284e-06	1.27861e-06	1.00699e-06	8.13927e-07	1.4658e-06	1.36257e-06
Anthracocystis	7.4137e-07	1.6264e-07	0	8.49006e-07	7.01589e-08	5.75095e-07	4.01928e-07	2.49665e-07	6.76412e-07	9.39625e-07	6.99272e-07	3.59576e-07	3.61036e-07	7.70208e-07	0	3.00858e-07	1.11947e-07	0	1.29822e-07	1.07844e-07	9.09776e-08	1.37893e-06	5.23403e-07	0
Antonospora	0	0	9.81084e-08	0	0	0	0	0	0	0	0	0	0	2.68099e-07	0	0	5.12601e-07	0	0	0	0	5.49651e-07	0	0
Antribacter	2.21399e-06	2.6817e-06	2.86568e-06	4.05834e-06	3.66061e-06	4.17916e-06	2.01783e-06	4.3828e-06	3.71459e-06	4.59045e-06	2.27858e-06	1.9503e-06	4.18914e-06	4.48575e-06	2.91449e-06	3.29487e-06	4.53092e-06	4.65495e-06	4.20628e-06	3.61651e-06	2.73895e-06	3.02941e-06	2.94059e-06	2.84649e-06
Antricoccus	1.1101e-05	1.0437e-05	2.08335e-05	9.91144e-06	1.61439e-05	1.11371e-05	1.40603e-05	1.66232e-05	9.51686e-06	1.03569e-05	1.02018e-05	7.76872e-06	1.04555e-05	1.37811e-05	8.64479e-06	1.16891e-05	8.42149e-06	1.04646e-05	7.97312e-06	6.27947e-06	8.38376e-06	4.44478e-06	1.0031e-05	6.30468e-06
Antrodiella	0	0	0	3.45019e-07	2.40294e-07	3.36832e-07	0	6.93408e-07	1.37427e-06	1.27975e-06	1.01832e-06	1.93707e-06	1.26988e-06	1.58665e-06	1.31021e-06	1.06771e-06	1.85782e-06	1.17907e-06	1.86095e-06	2.73529e-06	1.82095e-06	6.18287e-06	4.05201e-06	2.71432e-06
Aokuangvirus	3.54332e-07	0	1.0076e-07	0	0	0	2.10741e-07	0	0	0	0	0	0	0	0	3.94368e-07	0	0	0	2.82725e-07	0	0	1.16968e-07	1.29737e-07
Aphanizomenon	4.39049e-06	5.11331e-06	6.50169e-06	6.62846e-06	8.2096e-06	6.55684e-06	4.26088e-06	5.99967e-06	2.91444e-06	4.73566e-06	4.16149e-06	5.28995e-06	6.21158e-06	4.62837e-06	3.91564e-06	5.30715e-06	3.60997e-06	3.25097e-06	4.23169e-06	3.46526e-06	3.85312e-06	3.85776e-06	3.63332e-06	2.79566e-06
Aphanocapsa	3.24012e-06	3.22467e-06	4.09486e-06	5.15839e-06	4.04636e-06	4.43219e-06	5.02214e-06	4.39382e-06	3.38849e-06	4.22592e-06	4.14661e-06	4.09438e-06	5.7148e-06	3.79275e-06	4.24107e-06	6.15246e-06	4.69725e-06	2.91741e-06	4.24366e-06	6.95937e-06	2.67558e-06	3.47437e-06	4.33237e-06	4.29879e-06
Aphanothece	1.51145e-05	1.50534e-05	1.5215e-05	1.75876e-05	1.28251e-05	1.27374e-05	1.27465e-05	8.38161e-06	1.35389e-05	1.22028e-05	1.39526e-05	1.45774e-05	1.26731e-05	1.17594e-05	1.67897e-05	1.23071e-05	1.41834e-05	8.3295e-06	1.43293e-05	6.86416e-06	1.04556e-05	8.12849e-06	8.79146e-06	1.08729e-05
Apibacter	1.34915e-06	9.73343e-07	8.36652e-07	1.03787e-06	8.61641e-07	1.20334e-06	2.36313e-06	1.29141e-06	1.06617e-06	1.77793e-06	1.23274e-06	1.15382e-06	1.64596e-06	1.54578e-06	1.84573e-06	1.64397e-06	1.14527e-06	1.35107e-06	7.8162e-07	6.94406e-07	1.99978e-06	1.38466e-06	8.27863e-07	7.14992e-07
Apiotrichum	9.01049e-08	1.23958e-07	0	0	4.08254e-07	0	8.03857e-08	3.21543e-07	4.17036e-07	1.28726e-07	2.0935e-07	4.16609e-07	3.786e-08	7.96473e-07	8.98317e-08	4.75008e-07	1.0593e-06	3.2741e-07	1.61351e-07	6.11225e-07	4.77018e-08	4.68226e-07	4.87691e-07	2.13345e-07
Aplosporella	1.06821e-07	1.42781e-07	0	3.2096e-07	0	9.06353e-07	7.25797e-07	8.86927e-07	1.87784e-07	8.52221e-07	3.04509e-07	5.28966e-07	4.06505e-07	1.2735e-06	6.49333e-07	2.6692e-07	0	1.21329e-07	7.29727e-07	0	6.82967e-07	5.58961e-07	7.46174e-08	0
Aquabacter	3.00457e-05	2.1425e-05	2.32958e-05	2.31095e-05	1.43475e-05	1.54811e-05	1.7813e-05	1.82571e-05	3.14368e-05	2.97648e-05	3.4214e-05	2.71903e-05	2.61624e-05	2.29305e-05	2.49349e-05	2.37571e-05	4.31132e-05	3.90579e-05	4.35618e-05	3.28918e-05	3.08902e-05	3.03953e-05	3.55125e-05	3.51703e-05
Aquabacterium	0.000329665	0.000316171	0.000350144	0.000284632	0.000289747	0.000290148	0.000301534	0.000285213	0.000336794	0.000241027	0.000313828	0.000258538	0.00024335	0.000224163	0.000261663	0.000218939	0.00029444	0.000359572	0.000337577	0.000359324	0.000300496	0.000222408	0.000240959	0.000279547
Aqualcavirus	0	0	0	0	0	0	8.1223e-08	1.56306e-07	0	0	0	0	0	2.86979e-07	0	0	0	2.35074e-07	0	0	2.75776e-07	0	3.60651e-07	1.00006e-07
Aquamicrobium	1.77887e-05	1.33845e-05	1.49507e-05	1.90504e-05	1.43331e-05	1.068e-05	1.61174e-05	1.71207e-05	1.28858e-05	1.54512e-05	2.43832e-05	1.21832e-05	1.69035e-05	1.35725e-05	1.27968e-05	1.47609e-05	2.0748e-05	2.79845e-05	1.95027e-05	1.68922e-05	1.13711e-05	1.27954e-05	1.36299e-05	1.45185e-05
Aquaspirillum	5.66246e-06	8.67482e-06	6.14308e-06	8.36701e-06	4.73827e-06	5.18097e-06	9.13471e-06	7.49274e-06	8.67716e-06	4.74772e-06	6.54669e-06	4.14111e-06	4.77229e-06	5.05429e-06	4.76723e-06	6.40357e-06	7.09217e-06	6.11209e-06	5.42204e-06	5.19893e-06	4.61644e-06	5.23183e-06	5.92156e-06	7.3865e-06
Aquibacillus	4.36353e-07	5.05804e-07	6.64576e-07	2.80667e-07	6.19406e-07	6.6194e-07	1.37832e-06	8.96055e-07	4.49146e-07	5.55853e-07	1.68454e-06	1.19986e-06	1.18961e-06	1.42263e-06	3.84785e-07	4.50787e-07	1.13821e-06	6.16177e-07	1.46682e-07	6.02277e-07	5.27799e-07	1.88975e-07	5.52998e-07	0
Aquicella	7.34041e-06	1.43343e-05	1.43197e-05	2.05945e-05	1.97397e-05	1.58216e-05	1.28232e-05	1.50978e-05	2.3391e-05	4.35468e-05	3.24315e-05	4.14812e-05	3.58416e-05	2.24981e-05	2.23358e-05	2.90106e-05	1.25513e-05	1.02392e-05	9.5449e-06	6.07949e-06	5.61797e-06	3.55574e-06	3.89081e-06	7.62115e-06
Aquidulcibacter	9.13649e-07	9.17648e-07	8.11658e-07	7.0562e-07	5.71417e-07	1.70824e-06	7.75761e-07	1.62707e-06	1.69204e-06	1.32479e-06	9.14401e-07	1.91827e-06	1.66959e-06	9.03921e-07	1.16349e-06	8.4873e-07	5.08073e-07	9.78136e-07	1.72767e-06	9.47588e-07	9.5922e-08	6.35683e-07	8.8527e-07	1.50851e-06
Aquifex	1.61512e-06	1.02205e-06	1.03453e-06	2.27672e-06	1.62892e-06	2.40707e-06	2.04892e-06	7.71945e-07	5.80969e-07	7.26775e-07	1.42574e-06	1.59166e-06	1.8815e-06	3.1711e-06	2.34987e-06	1.5241e-06	1.86208e-06	1.69476e-06	1.33231e-06	8.85483e-07	9.77701e-06	1.13072e-06	7.38748e-07	8.84221e-07
Aquiflexum	1.08479e-05	7.13449e-06	1.50854e-05	9.6712e-06	8.04349e-06	1.01264e-05	1.03808e-05	5.79991e-06	6.27843e-06	1.0523e-05	1.09337e-05	8.56754e-06	9.78926e-06	6.98989e-06	8.96378e-06	8.17408e-06	1.60571e-05	1.10459e-05	1.11611e-05	1.3928e-05	1.8523e-05	9.62651e-06	1.15499e-05	1.00158e-05
Aquimarina	2.41673e-05	2.62714e-05	3.19078e-05	2.89172e-05	2.07457e-05	2.56783e-05	3.2473e-05	2.06343e-05	2.62385e-05	3.52858e-05	3.47124e-05	3.01639e-05	3.20808e-05	2.91793e-05	3.13856e-05	2.77456e-05	3.36278e-05	2.83601e-05	3.65777e-05	2.26638e-05	7.62831e-05	2.31641e-05	2.36531e-05	2.76281e-05
Aquimixticola	0	0	0	0	1.91702e-07	0	0	0	0	0	0	0	0	0	0	0	0	3.17847e-07	6.36312e-07	0	0	0	0	0
Aquimonas	9.81904e-06	1.13909e-05	1.38701e-05	1.1949e-05	1.31432e-05	1.16986e-05	1.22521e-05	1.07283e-05	1.32721e-05	1.27547e-05	9.5005e-06	1.13882e-05	9.8393e-06	1.22706e-05	1.07486e-05	1.06816e-05	9.67785e-06	1.16168e-05	9.83792e-06	1.19778e-05	1.09283e-05	8.13231e-06	8.16913e-06	1.01497e-05
Aquincola	0.000479224	0.000740868	0.000436881	0.000335379	0.00031901	0.000321267	0.000281119	0.000270876	0.000533632	0.000329945	0.000444217	0.000362736	0.000345629	0.000265358	0.000369965	0.000278693	0.000552542	0.000656257	0.000516564	0.000570627	0.000484049	0.000373763	0.000443193	0.000497072
Aquirufa	1.24075e-06	1.2461e-06	1.97103e-06	1.43956e-06	9.54507e-07	1.40605e-06	2.13435e-06	1.23519e-06	1.8318e-06	1.62099e-06	1.79079e-06	2.35198e-06	1.70561e-06	1.87071e-06	2.14368e-06	2.30366e-06	2.24687e-06	4.54567e-07	1.4845e-06	2.40173e-06	1.85136e-07	9.94255e-07	1.07214e-06	8.56697e-07
Aquisalibacillus	2.9881e-07	9.98485e-08	4.7593e-07	9.52129e-07	0	8.5976e-07	3.27561e-07	7.04015e-07	0	0	2.92412e-07	1.19244e-07	5.9864e-08	0	2.29357e-07	0	2.46568e-07	4.76771e-07	6.74301e-07	0	0	0	0	0
Aquisalimonas	8.04809e-06	4.01817e-06	7.0193e-06	7.39523e-06	6.3466e-06	6.87129e-06	5.91551e-06	6.00351e-06	5.97192e-06	7.84605e-06	6.26423e-06	5.43849e-06	4.2362e-06	5.16729e-06	5.65106e-06	5.50331e-06	5.53974e-06	5.37912e-06	4.21886e-06	5.24311e-06	5.73621e-06	4.32419e-06	6.51911e-06	5.39435e-06
Aquisphaera	0.000226773	0.000255122	0.000260603	0.000260526	0.00026476	0.00024993	0.000244975	0.000250786	0.000212741	0.000228247	0.000227817	0.000214462	0.000247031	0.00022633	0.000251872	0.000248138	0.0001785	0.00015611	0.000169841	0.000168799	0.000199767	0.000156521	0.000166819	0.000205294
Aquitalea	1.38546e-05	1.86926e-05	1.55352e-05	1.72449e-05	1.36259e-05	1.44025e-05	1.79569e-05	1.5206e-05	1.30356e-05	1.20483e-05	1.0687e-05	9.67045e-06	1.20432e-05	8.78213e-06	1.30751e-05	1.15757e-05	7.69178e-06	7.01231e-06	7.25437e-06	5.58274e-06	1.01618e-05	9.05401e-06	9.7247e-06	1.30246e-05
Arabia	0	1.17732e-07	0	0	1.01573e-07	1.15193e-06	1.16379e-07	0	1.11582e-07	0	6.71659e-07	0	1.04539e-07	0	0	1.05736e-07	5.77244e-07	0	0	0	5.11584e-07	1.21082e-07	0	0
Arachidicoccus	3.19802e-05	3.75392e-05	4.41935e-05	3.85665e-05	3.92911e-05	5.19539e-05	4.64077e-05	3.55327e-05	2.6745e-05	3.42685e-05	2.97246e-05	2.62593e-05	3.66994e-05	3.16699e-05	4.03711e-05	4.06873e-05	3.01794e-05	2.5905e-05	2.23513e-05	2.10959e-05	3.66388e-05	2.98964e-05	2.65567e-05	3.47951e-05
Arboricoccus	6.11618e-06	6.61351e-06	7.91123e-06	7.04423e-06	6.36005e-06	8.75504e-06	6.75184e-06	6.99053e-06	5.03109e-06	7.6118e-06	5.79921e-06	6.33217e-06	9.00901e-06	5.95404e-06	5.41954e-06	7.55488e-06	6.30252e-06	5.53647e-06	6.87255e-06	7.18586e-06	4.00776e-06	4.1337e-06	5.11717e-06	7.3126e-06
Arcanobacterium	2.60901e-07	2.59649e-07	5.41983e-07	1.86536e-06	5.51645e-07	2.75102e-07	2.18476e-06	1.42607e-06	8.29831e-07	8.56427e-07	1.73461e-07	7.5782e-07	9.9909e-07	7.56771e-07	5.66828e-07	1.37641e-06	7.01412e-07	2.54252e-06	1.05469e-06	1.26983e-06	2.01607e-06	5.43463e-07	6.06283e-07	1.09592e-06
Archaeoglobus	2.95468e-06	3.03526e-06	2.93955e-06	3.90964e-06	2.76852e-06	2.38436e-06	3.50164e-06	3.5849e-06	5.39734e-06	2.64427e-06	3.2417e-06	3.8703e-06	3.83191e-06	3.76549e-06	2.41695e-06	2.01669e-06	1.48517e-06	1.31934e-06	2.54906e-06	3.42693e-06	2.97081e-06	3.83487e-06	3.67293e-06	3.80358e-06
Archangium	0.000404867	0.000694544	0.000514822	0.000497374	0.000479146	0.000419576	0.000460674	0.000401716	0.000364049	0.000369005	0.000367184	0.00036254	0.000448786	0.000391932	0.000471148	0.000449257	0.000332437	0.000317555	0.000295536	0.000425947	0.000307419	0.000251163	0.00031153	0.000312785
Arcicella	7.42756e-06	1.13854e-05	1.2178e-05	7.33695e-06	1.09237e-05	1.1995e-05	1.19516e-05	8.11254e-06	8.4493e-06	1.18059e-05	1.07404e-05	8.30517e-06	1.21217e-05	9.20792e-06	1.17067e-05	1.06559e-05	1.33591e-05	6.80533e-06	9.30927e-06	1.12377e-05	1.23747e-05	8.60945e-06	8.01503e-06	9.73119e-06
Arcobacter	1.87368e-06	4.79197e-06	6.03117e-06	2.97857e-06	3.60745e-06	4.25061e-06	5.67668e-06	3.68949e-06	5.13243e-06	4.34041e-06	3.96336e-06	4.57993e-06	3.32034e-06	4.13976e-06	2.63727e-06	4.00856e-06	3.45514e-06	4.92693e-06	3.26646e-06	2.91701e-06	4.25283e-06	5.92098e-06	3.19222e-06	3.51417e-06
Arcticibacter	1.34912e-05	1.0849e-05	1.8443e-05	1.19921e-05	1.20094e-05	1.4624e-05	1.43493e-05	1.1066e-05	1.42474e-05	1.93159e-05	1.69372e-05	1.30731e-05	1.24415e-05	1.22709e-05	1.93357e-05	1.57244e-05	1.82262e-05	1.98639e-05	1.27631e-05	1.48881e-05	1.58331e-05	1.24929e-05	1.84487e-05	1.79439e-05
Arcticibacterium	2.76181e-06	2.75338e-06	4.37492e-06	2.27897e-06	2.27839e-06	2.2672e-06	1.58108e-06	1.2717e-06	2.2408e-06	2.27019e-06	3.53704e-06	2.70859e-06	2.5107e-06	1.70498e-06	3.07123e-06	1.83018e-06	2.75067e-06	2.32187e-06	1.6705e-06	2.32823e-06	1.01492e-05	1.54475e-06	2.65678e-06	2.84835e-06
Ardenticatena	1.22454e-05	1.96429e-05	1.3352e-05	1.53092e-05	1.42746e-05	1.49063e-05	1.13917e-05	1.42111e-05	1.43537e-05	1.5854e-05	1.47048e-05	1.86389e-05	1.78684e-05	1.66391e-05	1.66333e-05	1.11317e-05	1.43374e-05	1.08487e-05	1.57938e-05	1.06869e-05	1.4949e-05	1.0722e-05	9.48156e-06	1.44694e-05
Arenibacter	1.30969e-05	1.19378e-05	1.37696e-05	9.07176e-06	1.16649e-05	1.13329e-05	1.42469e-05	1.18812e-05	1.40306e-05	1.5715e-05	1.52823e-05	1.48391e-05	1.44108e-05	1.26096e-05	1.33204e-05	1.62206e-05	1.48886e-05	1.37386e-05	1.27745e-05	1.12396e-05	1.57156e-05	1.35006e-05	1.48439e-05	1.88569e-05
Arenicella	1.70925e-06	2.09824e-06	1.75172e-06	2.06605e-06	1.32211e-06	2.16955e-06	1.30062e-06	2.83893e-06	1.95713e-06	3.08344e-06	3.89902e-06	1.86406e-06	1.54973e-06	2.06958e-06	1.18409e-06	2.32928e-06	1.96001e-06	4.75883e-06	3.14311e-06	3.15829e-06	1.4867e-06	1.66986e-06	1.49374e-06	2.34816e-06
Arenimonas	0.000127858	0.000110164	0.000194173	0.000124377	0.000122097	0.000110388	0.000107221	0.000101522	0.000169469	0.000147357	0.000169988	0.000169786	0.000141441	0.000129208	0.000187734	0.000148053	0.000242186	0.000227189	0.000266858	0.000213763	0.000188711	0.000154082	0.000166981	0.000208964
Arenitalea	7.5694e-07	7.18997e-07	6.55627e-07	3.01662e-07	4.4265e-07	3.79627e-07	1.91348e-07	4.1818e-07	1.84238e-07	4.78144e-08	1.80488e-07	2.2551e-07	7.38391e-07	2.55281e-07	5.45266e-07	2.06223e-07	3.28952e-07	0	0	1.12482e-07	2.84506e-07	2.82829e-07	5.66613e-07	1.06083e-07
Arequatrovirus	0	0	4.33502e-07	1.69016e-07	0	0	7.54775e-07	0	0	0	7.89331e-07	7.42104e-08	0	0	1.52905e-07	0	0	0	0	0	0	3.41008e-07	0	0
Aresaunavirus	3.39424e-07	1.14227e-06	3.3775e-07	0	0	7.49316e-08	0	2.92312e-07	0	0	0	0	0	0	0	0	0	0	0	0	0	0	0	0
Arhodomonas	3.08302e-06	2.60263e-06	4.24409e-06	6.88078e-06	2.8731e-06	2.76556e-06	3.79202e-06	5.99749e-06	3.68578e-06	3.57995e-06	3.15777e-06	1.74758e-06	3.54353e-06	4.08857e-06	4.28312e-06	4.39384e-06	4.08681e-06	2.82008e-06	4.49769e-06	2.67447e-06	3.03551e-06	3.96733e-06	2.82412e-06	2.13873e-06
Armatimonas	9.47565e-05	0.000136493	0.00013202	0.00014912	0.000199134	0.000209405	0.000212912	0.000185448	0.000136668	0.000134956	0.000149507	0.000147491	0.00013049	0.000113757	0.000160343	0.000140554	8.13438e-05	7.784e-05	7.15742e-05	6.92592e-05	0.00012973	7.94892e-05	0.000112445	0.000138171
Armillaria	3.92136e-06	4.27133e-06	4.45462e-06	3.00156e-06	3.97689e-06	3.49917e-06	3.61195e-06	4.56221e-06	2.6195e-06	3.25344e-06	4.04495e-06	3.57381e-06	3.85004e-06	6.09802e-06	3.36492e-06	4.28583e-06	1.36122e-06	2.94703e-06	1.51347e-06	3.63421e-06	1.8344e-06	5.85889e-06	3.4292e-06	1.33364e-06
Armstrongvirus	2.57064e-07	0	0	0	0	0	0	0	0	0	0	0	0	0	0	5.36457e-07	0	0	0	0	0	0	0	0
Aromatoleum	0.0020281	0.00189091	0.00209689	0.00209861	0.00171934	0.00173093	0.00167941	0.00149984	0.00148943	0.00148894	0.00170466	0.00164013	0.00160122	0.00132813	0.00158482	0.00136773	0.00127108	0.00133896	0.00096623	0.00129546	0.00180797	0.00169285	0.00220092	0.0023635
Arsenicibacter	8.47308e-06	8.53444e-06	1.1925e-05	1.16567e-05	1.13376e-05	1.19173e-05	1.20314e-05	8.6915e-06	9.81739e-06	1.2916e-05	1.0917e-05	9.69513e-06	9.87898e-06	8.54767e-06	1.01381e-05	1.26039e-05	7.80281e-06	5.56283e-06	7.58428e-06	9.41818e-06	1.02565e-05	7.40388e-06	6.65806e-06	9.32141e-06
Arsenicicoccus	3.12596e-06	4.98625e-06	4.3737e-06	4.28272e-06	8.05502e-06	5.71394e-06	4.40483e-06	6.512e-06	5.2078e-06	4.40895e-06	3.07941e-06	3.75855e-06	5.27294e-06	5.10887e-06	4.70677e-06	5.45953e-06	3.757e-06	5.24722e-06	3.76349e-06	4.84905e-06	7.18132e-06	6.13628e-06	9.30977e-06	7.00747e-06
Arsenicitalea	3.31504e-06	5.4549e-06	4.15072e-06	5.88112e-06	3.6427e-06	3.37321e-06	4.06359e-06	3.27609e-06	8.45713e-06	5.64265e-06	7.99455e-06	7.75116e-06	8.08731e-06	6.17481e-06	5.95749e-06	7.1394e-06	1.50009e-05	1.68488e-05	1.06764e-05	1.10297e-05	4.6337e-06	3.13444e-06	3.74715e-06	3.87562e-06
Arsenophonus	0	0	6.1826e-07	1.15127e-07	0	0	6.32268e-07	0	1.12225e-06	9.06164e-07	8.46809e-08	1.70957e-07	3.53161e-07	9.56597e-08	5.11536e-07	8.45891e-10	1.44215e-06	4.2849e-07	0	0	0	8.46044e-07	4.51259e-08	0
Arsukibacterium	7.482e-07	6.78679e-07	1.16788e-06	4.73402e-07	6.28136e-07	8.41168e-07	8.12948e-07	9.07718e-07	2.26887e-07	6.54111e-07	1.56709e-06	1.24355e-06	5.95824e-07	4.24581e-07	8.01548e-07	1.22078e-06	1.7162e-06	1.25547e-06	2.35896e-06	7.01015e-07	1.59048e-06	1.48451e-06	6.59058e-07	1.03901e-06
Arthonia	0	0	8.98342e-08	0	0	0	2.50926e-07	9.03936e-08	0	0	0	2.52136e-07	0	2.45488e-07	0	0	0	0	0	0	1.06323e-07	0	0	0
Arthrinium	0	0	1.84105e-07	0	0	7.56663e-08	0	0	3.10449e-07	0	0	6.839e-08	0	2.51549e-07	1.65218e-07	3.69345e-07	0	1.68412e-07	1.10731e-07	9.12132e-07	1.08948e-07	1.03144e-07	0	6.50591e-07
Arthrobacter	0.000149697	0.000173032	0.000204593	0.000166926	0.000212478	0.000224884	0.000211858	0.000238078	0.000218515	0.000242398	0.000211131	0.000243456	0.000224344	0.000333173	0.000217727	0.000234741	0.000249415	0.000281215	0.000266791	0.000308039	0.000217712	0.000379192	0.000328111	0.000237986
Arthrobotrys	2.66449e-06	2.16597e-06	2.60772e-06	2.66898e-06	2.94321e-06	3.0272e-06	2.49365e-06	2.70501e-06	2.94632e-06	3.02089e-06	2.80858e-06	2.50878e-06	3.30185e-06	2.81504e-06	2.04868e-06	2.31467e-06	1.13207e-06	1.68118e-06	1.32999e-06	2.59453e-06	2.00537e-06	3.66073e-06	2.35239e-06	1.47685e-06
Arthrocladium	0	4.8843e-07	0	9.80711e-08	4.20087e-08	9.52834e-08	0	8.75016e-07	0	0	0	0	0	0	0	5.09989e-07	0	0	0	0	0	0	0	0
Arthroderma	0	0	0	0	0	0	0	0	1.05468e-07	1.06764e-07	0	0	0	9.30388e-08	0	1.99885e-07	0	0	0	4.46663e-07	2.41776e-07	0	0	0
Arthrospira	2.9601e-06	4.73048e-06	4.26826e-06	5.00513e-06	6.00807e-06	4.34381e-06	5.19031e-06	3.94067e-06	5.76154e-06	3.07816e-06	5.26308e-06	3.22685e-06	5.26007e-06	5.02051e-06	6.83968e-06	3.96733e-06	3.13528e-06	3.93376e-06	5.60501e-06	4.14422e-06	5.34469e-06	3.19509e-06	3.71365e-06	4.33535e-06
Arundinibacter	2.9193e-06	3.2009e-06	4.25343e-06	2.24863e-06	4.18601e-06	3.7029e-06	3.36513e-06	4.21604e-06	4.392e-06	8.41542e-06	7.02671e-06	5.3126e-06	4.26533e-06	2.9916e-06	4.34603e-06	4.30124e-06	7.31332e-06	6.96595e-06	6.04653e-06	4.77173e-06	3.8429e-06	2.32573e-06	3.75499e-06	3.41796e-06
Asaccharobacter	6.2879e-08	4.71863e-07	1.74497e-07	5.59435e-07	2.93759e-07	6.39611e-07	5.61346e-07	4.62898e-07	1.84225e-07	3.06153e-07	0	2.50927e-07	0	3.86451e-07	2.75777e-07	4.26692e-07	2.58569e-07	2.89322e-07	0	0	9.0511e-07	3.21334e-07	3.50903e-07	0
Asaccharospora	2.08499e-07	3.97612e-07	7.97458e-08	2.19881e-07	9.81298e-08	0	4.16974e-08	1.27429e-07	1.06163e-06	7.09567e-07	6.52694e-07	9.19303e-07	2.37344e-07	2.88643e-07	4.42583e-07	3.05135e-07	1.81984e-06	1.5635e-06	1.52917e-06	1.32298e-06	1.32365e-06	1.06694e-06	7.18757e-07	2.25267e-06
Asaia	2.32772e-06	2.31552e-06	3.67055e-06	3.04916e-06	3.32904e-06	3.83499e-06	2.35631e-06	3.16406e-06	1.46842e-06	1.85858e-06	1.80949e-06	2.50501e-06	1.63354e-06	2.34493e-06	2.84976e-06	2.31715e-06	4.00936e-06	3.97965e-06	2.46231e-06	1.71863e-06	1.4657e-06	1.17027e-06	1.1116e-06	1.50505e-06
Asanoa	0.000138943	0.000125734	8.76452e-05	0.000118164	0.000146748	0.000131322	0.000143524	0.00019187	0.000109709	0.000108342	0.000158864	9.64206e-05	0.000114639	0.000111722	0.000117567	0.000122678	7.09164e-05	0.000122961	7.21311e-05	6.44251e-05	0.000148318	6.8338e-05	0.00010449	8.98473e-05
Ascidiaceihabitans	1.06565e-08	7.66383e-07	0	0	1.82654e-07	3.18335e-07	2.19203e-07	1.27826e-07	0	9.73177e-08	0	0	8.30753e-08	0	4.22507e-07	0	3.118e-07	7.83581e-07	0	0	3.52993e-07	0	4.92596e-07	1.0268e-07
Ascobolus	9.82043e-08	8.66623e-07	1.67556e-07	0	7.01589e-08	4.94633e-07	2.88793e-07	5.8293e-07	1.12996e-06	8.16777e-07	4.06762e-07	1.40571e-06	3.20565e-07	2.19481e-06	5.42403e-07	3.0181e-07	9.27606e-07	1.27045e-06	2.05689e-06	3.42489e-06	2.5116e-07	4.13137e-06	2.26436e-06	3.34026e-07
Ascochyta	0	0	0	0	0	0	2.51436e-06	5.10386e-08	1.0475e-07	5.30187e-08	5.12694e-08	9.03054e-08	1.19854e-07	0	3.4524e-07	0	0	0	0	7.48303e-07	0	0	4.46166e-07	0
Ascodesmis	5.71254e-08	6.335e-07	2.43668e-08	1.0384e-07	8.89596e-08	2.52221e-08	5.09635e-08	4.7106e-07	3.34745e-07	4.45357e-07	0	4.8455e-07	2.4058e-07	2.50009e-06	1.18836e-07	3.51208e-07	8.52857e-07	1.21329e-07	4.60283e-07	2.66318e-07	2.64745e-07	8.27058e-07	8.65562e-08	0
Ascoidea	0	0	0	0	0	0	0	0	3.94827e-07	8.75702e-08	0	4.94736e-08	1.57395e-07	2.24362e-07	5.09683e-08	2.14583e-07	1.43227e-07	2.40076e-07	0	3.70951e-07	0	9.28698e-07	3.32662e-07	0
Ascosphaera	0	3.24166e-07	0	0	2.55203e-07	0	0	4.96706e-07	9.0578e-08	4.70681e-07	1.39471e-07	1.64136e-07	0	1.17693e-06	2.53642e-07	3.43332e-07	1.14581e-07	8.15338e-07	8.6813e-07	9.86887e-07	0	5.10226e-07	1.25286e-06	1.387e-07
Ascovirus	0	0	0	0	0	0	0	3.4495e-07	0	0	0	0	0	0	0	0	0	0	0	0	0	0	0	0
Asinibacterium	4.13448e-05	3.52844e-05	5.22207e-05	3.51888e-05	4.24181e-05	5.29323e-05	3.86382e-05	3.18148e-05	3.2697e-05	3.64329e-05	3.98313e-05	3.74064e-05	4.46502e-05	3.64728e-05	4.29972e-05	4.11439e-05	4.04505e-05	2.93081e-05	3.51575e-05	3.16905e-05	3.14376e-05	2.51177e-05	2.95016e-05	3.18923e-05
Aspergillus	1.80413e-05	1.91308e-05	2.88977e-05	1.17062e-05	3.85037e-05	2.00511e-05	1.76883e-05	3.89341e-05	4.95836e-05	7.1495e-05	2.65927e-05	7.82668e-05	4.38855e-05	0.00014803	3.88274e-05	4.65664e-05	8.38139e-05	0.000115737	0.000110733	0.00016491	4.19632e-05	0.00023763	0.000174795	6.65246e-05
Asteriusvirus	0	0	0	0	0	0	0	3.68483e-07	0	0	0	0	0	0	0	0	2.2135e-07	0	0	1.18873e-07	1.00282e-07	9.49396e-08	0	0
Asterophora	7.53464e-08	5.94798e-07	1.92834e-07	0	0	0	0	0	0	0	0	0	0	0	0	0	0	0	0	0	0	0	0	0
Asticcacaulis	7.24e-05	9.23822e-05	8.50731e-05	9.63297e-05	9.5249e-05	9.72151e-05	0.000107824	0.000121891	8.60824e-05	6.84479e-05	6.85784e-05	6.98176e-05	7.64977e-05	6.92685e-05	6.81172e-05	8.48577e-05	8.08576e-05	8.06582e-05	6.85775e-05	7.08395e-05	5.53324e-05	4.54123e-05	6.35814e-05	6.70087e-05
Athalassotoga	0	0	1.23244e-07	0	0	6.37848e-08	3.70474e-07	0	0	0	0	0	0	0	0	0	0	0	0	0	1.1031e-07	6.26602e-07	0	0
Atlantibacter	5.33989e-07	5.21938e-07	3.92835e-07	1.9375e-07	2.81382e-07	3.64333e-07	1.32111e-06	3.17014e-07	4.01171e-07	8.08771e-07	8.14958e-07	3.49521e-07	5.68546e-07	5.31272e-07	8.30412e-07	7.72293e-07	1.3527e-07	8.74122e-07	1.61154e-06	5.9737e-07	6.09794e-07	5.38288e-07	2.40434e-07	6.0873e-07
Atopobacter	8.24545e-08	4.97358e-07	0	1.49882e-07	6.4202e-08	0	7.35605e-08	3.31501e-07	7.26333e-08	0	2.844e-07	0	0	0	0	2.06485e-07	0	5.7132e-07	4.28907e-07	0	0	2.90329e-07	1.63314e-07	4.86104e-07
Atopobium	2.36221e-07	1.17732e-07	6.62364e-07	8.759e-07	1.8393e-07	8.53341e-07	0	3.04162e-07	7.54265e-07	4.31916e-07	5.46068e-07	7.99611e-07	5.83674e-07	5.96018e-07	8.28518e-07	1.93275e-07	2.6562e-07	1.02578e-07	5.57755e-07	0	0	0	0	0
Atopococcus	0	0	7.10118e-08	0	3.24067e-07	2.20513e-07	7.42611e-08	7.1454e-08	7.3325e-08	1.48452e-07	0	1.32872e-07	0	2.02741e-07	0	1.38968e-07	0	5.05235e-07	0	3.12264e-07	0	0	0	0
Attisvirus	8.94899e-08	2.69216e-08	2.54479e-08	2.71118e-08	8.59386e-07	6.93826e-07	5.05634e-07	1.09716e-06	0	0	0	0	7.17142e-08	2.31803e-08	2.20747e-07	7.47011e-08	0	0	0	0	0	0	0	0
Aulographum	0	3.53195e-07	0	0	0	0	5.80658e-07	0	0	1.06764e-07	0	1.91117e-07	2.87839e-07	9.70262e-08	0	0	1.39135e-07	1.61194e-07	1.61351e-07	1.4944e-07	0	4.77411e-07	7.69593e-07	0
Aulosira	5.82058e-06	7.80424e-06	1.07568e-05	8.35819e-06	7.30151e-06	7.86591e-06	6.47836e-06	7.58667e-06	6.48265e-06	6.36297e-06	8.55516e-06	6.85538e-06	6.22167e-06	5.79035e-06	6.82764e-06	7.18127e-06	5.86757e-06	3.95608e-06	8.18645e-06	6.42172e-06	9.72072e-06	8.11434e-06	4.77433e-06	5.94504e-06
Aurantibacter	1.69959e-07	1.72711e-07	3.33861e-07	9.13075e-08	9.99538e-07	0	4.05737e-07	3.4495e-07	2.38211e-07	8.95833e-08	3.36424e-07	0	0	0	1.65208e-07	0	1.04825e-06	2.47058e-07	3.11725e-07	3.14788e-07	9.97456e-07	1.92363e-07	1.41895e-07	5.02388e-07
Aurantimicrobium	1.52179e-06	2.214e-06	1.16504e-06	1.53166e-06	9.13568e-07	2.75012e-07	1.43496e-06	9.62548e-07	2.59899e-06	2.74499e-06	3.07163e-06	2.15992e-06	1.52345e-06	1.35263e-06	2.71986e-06	1.66015e-06	2.79256e-07	2.4441e-07	2.43561e-07	6.77129e-07	1.35942e-06	2.47494e-06	1.24266e-06	3.07928e-07
Aurantimonas	2.8862e-05	3.22486e-05	3.50092e-05	3.70019e-05	2.88696e-05	3.0978e-05	2.41757e-05	2.80186e-05	2.95819e-05	2.87237e-05	4.80765e-05	3.40185e-05	5.30165e-05	3.47352e-05	3.00251e-05	3.26013e-05	5.01599e-05	5.04797e-05	4.50541e-05	3.60647e-05	3.64994e-05	2.84142e-05	3.22746e-05	3.74431e-05
Auraticoccus	1.80012e-06	2.10965e-06	2.8245e-06	6.43866e-06	4.09568e-06	6.86222e-06	4.06779e-06	4.46703e-06	3.68532e-06	5.00723e-06	2.73478e-06	1.52695e-06	2.58312e-06	3.38172e-06	4.49969e-06	3.90923e-06	3.2208e-06	2.09076e-06	3.72643e-06	2.55983e-06	2.11361e-06	2.67316e-06	2.56969e-06	2.28043e-06
Aureibacillus	4.46488e-07	6.23467e-07	4.06251e-07	6.4186e-07	6.45028e-07	1.07816e-06	6.69192e-07	6.47505e-07	2.91453e-07	2.02469e-07	0	9.17865e-08	3.7689e-07	4.70524e-07	1.2108e-06	9.36541e-07	6.40751e-08	1.48468e-07	0	0	1.82351e-07	2.1986e-07	1.70835e-07	3.15807e-07
Aureibaculum	5.976e-07	1.04108e-06	7.11595e-07	5.8625e-07	2.69103e-07	8.81573e-07	1.78279e-07	1.164e-06	9.74573e-08	1.04536e-06	9.17064e-07	4.05268e-07	8.64703e-08	5.96165e-07	7.48597e-08	8.76262e-07	1.26252e-08	9.54259e-07	1.42969e-07	0	1.30385e-06	7.88069e-07	7.73455e-07	6.79257e-07
Aureicoccus	6.50585e-07	4.3874e-07	6.32242e-07	3.05529e-07	0	8.97437e-08	3.13451e-07	7.2141e-08	4.27574e-07	3.51831e-07	6.55571e-07	9.82504e-08	0	2.41717e-07	2.29458e-07	1.71549e-07	1.03247e-06	2.71454e-06	8.35426e-07	9.33728e-07	1.72176e-06	1.71573e-07	1.56489e-07	9.04072e-07
Aureimonas	3.89655e-05	4.525e-05	4.25485e-05	5.19206e-05	4.16138e-05	4.69879e-05	5.46448e-05	4.45966e-05	4.45153e-05	4.418e-05	4.66719e-05	3.91108e-05	4.13036e-05	3.91943e-05	3.72217e-05	4.44464e-05	5.90551e-05	5.39846e-05	4.42727e-05	4.81395e-05	3.93444e-05	3.45529e-05	4.45706e-05	4.90445e-05
Aureispira	1.06475e-06	1.55657e-06	2.82123e-06	2.07123e-06	2.95249e-06	2.87048e-06	1.57538e-06	3.15791e-06	3.46191e-06	2.39735e-06	3.99275e-06	3.34538e-06	1.05544e-06	2.04696e-06	5.58154e-06	1.76427e-06	2.52453e-06	4.48447e-06	2.29258e-06	4.01059e-06	4.6888e-06	2.50948e-06	2.95173e-06	3.89548e-06
Aureitalea	1.36302e-06	7.83699e-07	1.24948e-06	1.77622e-06	4.91253e-07	1.10696e-06	1.9758e-06	1.185e-06	1.75749e-06	1.22387e-06	2.11196e-06	1.20709e-06	6.85586e-07	2.43658e-07	7.27942e-07	1.2541e-06	1.4289e-06	3.453e-06	1.1761e-06	2.29402e-06	2.04728e-06	5.6557e-07	1.28029e-06	1.71022e-06
Aureobasidium	1.23913e-06	7.73796e-07	9.67781e-07	1.00432e-06	9.59179e-07	1.09478e-06	1.66796e-06	8.12282e-07	1.4659e-06	2.67991e-07	3.5489e-07	9.5736e-07	9.42852e-07	1.16534e-06	6.10451e-07	6.81705e-07	5.04001e-07	8.23618e-08	8.68659e-07	3.85201e-07	0	1.21966e-07	0	7.16459e-07
Auricularia	6.54252e-07	1.14878e-06	1.02579e-06	9.76315e-07	1.45852e-07	3.73662e-07	3.85538e-07	8.12514e-07	2.42574e-06	1.69503e-06	2.44924e-06	1.23169e-06	1.25808e-06	1.67808e-06	4.73413e-07	4.36303e-07	1.09696e-06	1.30538e-06	8.15646e-07	2.92301e-06	2.13703e-06	3.65401e-06	2.80312e-06	1.24109e-06
Auriculariopsis	7.73467e-08	0	2.83148e-07	0	9.07388e-08	4.11624e-07	0	0	0	0	3.01464e-07	0	0	2.539e-07	0	6.81851e-08	0	0	4.18316e-07	3.80677e-07	1.42984e-07	5.68647e-07	4.89851e-07	0
Auritidibacter	0	0	4.41159e-07	3.05529e-07	1.70135e-07	2.79132e-07	4.0506e-07	0	0	0	0	0	5.36562e-07	8.48979e-08	1.093e-06	5.1618e-07	0	0	6.64385e-07	0	4.58432e-07	1.08502e-07	0	0
Austwickia	1.19455e-06	3.19243e-06	1.98201e-06	1.86917e-06	1.93299e-06	4.75493e-06	3.71325e-06	3.12893e-06	1.81797e-06	1.98246e-06	2.97831e-06	2.47121e-06	3.36156e-06	2.14e-06	2.53622e-06	1.39017e-06	4.58605e-06	3.66862e-06	2.47777e-06	1.58359e-06	2.94101e-06	1.79405e-06	4.84439e-06	3.70327e-06
Avibacterium	8.74018e-07	2.62934e-07	1.50433e-06	4.1472e-07	4.78899e-07	7.048e-07	5.48707e-07	3.03525e-07	1.07985e-06	9.62192e-08	4.187e-07	3.06331e-07	6.03303e-07	4.9136e-07	8.18023e-07	3.42273e-07	0	8.44618e-07	0	9.17617e-08	0	0	1.15408e-07	0
Avipoxvirus	0	1.98858e-07	0	0	0	0	0	0	0	0	0	0	0	0	0	0	0	0	0	0	0	0	0	0
Azoarcus	0.000249661	0.000234207	0.000282158	0.000268388	0.00023338	0.000232391	0.000235688	0.00022234	0.00025317	0.000217712	0.000241897	0.000231255	0.000218175	0.000192178	0.000209292	0.000203676	0.000237706	0.000258891	0.000232909	0.000220219	0.000230894	0.000204743	0.000241705	0.000275397
Azohydromonas	0.000387238	0.000301786	0.000384402	0.00028795	0.000305283	0.00029596	0.00029438	0.000296158	0.000422529	0.000308075	0.000384544	0.000329239	0.000301682	0.000245224	0.000322117	0.000267125	0.000335055	0.000413389	0.00037548	0.000355968	0.000312716	0.000279123	0.00030423	0.000346973
Azomonas	1.35957e-06	1.59396e-06	1.75587e-06	3.13055e-06	2.60805e-06	1.37596e-06	1.27356e-06	1.65452e-06	3.87424e-07	2.1238e-06	8.12394e-07	1.01622e-06	2.29461e-06	7.04015e-07	1.83062e-06	1.46474e-06	1.10785e-06	6.44094e-07	2.78283e-06	1.65719e-06	2.2366e-06	1.08739e-06	9.44249e-07	1.73778e-06
Azonexus	1.39884e-05	1.36661e-05	1.52355e-05	1.62961e-05	1.35514e-05	9.37352e-06	1.0776e-05	1.24432e-05	1.3749e-05	1.70462e-05	1.47137e-05	1.15665e-05	1.44481e-05	1.46987e-05	1.19722e-05	1.40202e-05	1.7143e-05	1.56399e-05	1.27918e-05	1.17739e-05	1.22424e-05	1.04801e-05	1.4859e-05	1.65934e-05
Azorhizobium	2.47986e-05	3.22344e-05	2.60376e-05	3.02868e-05	2.53449e-05	2.5361e-05	2.74688e-05	2.53307e-05	2.61293e-05	2.81874e-05	3.79169e-05	2.98764e-05	3.53253e-05	3.4243e-05	3.3076e-05	2.71459e-05	4.04973e-05	4.21107e-05	3.78173e-05	2.79879e-05	2.76228e-05	1.944e-05	2.16119e-05	2.61899e-05
Azospira	9.89197e-05	0.000172705	0.000120261	0.000128426	0.000136918	0.000107954	0.000160086	0.000125535	0.000132423	0.000241563	0.000116421	0.000123276	0.000118352	0.000133932	0.000108436	0.000123121	9.77681e-05	9.20295e-05	9.82163e-05	7.12551e-05	8.5154e-05	6.16532e-05	6.73871e-05	8.19623e-05
Azospirillum	0.000471259	0.00051118	0.000487991	0.000477013	0.000452129	0.000437009	0.000464257	0.000454633	0.000421499	0.000413909	0.000465307	0.000423308	0.000460546	0.000416945	0.00041725	0.000447826	0.000454412	0.000466346	0.000435071	0.000390901	0.000404792	0.000331688	0.0004074	0.000430217
Azotobacter	3.94916e-05	3.71909e-05	4.47909e-05	4.05637e-05	3.89711e-05	3.71991e-05	3.38859e-05	3.48693e-05	4.14985e-05	3.6281e-05	3.58216e-05	3.72503e-05	3.89035e-05	3.28536e-05	3.8843e-05	3.41434e-05	4.35165e-05	4.1279e-05	3.74317e-05	3.514e-05	3.98274e-05	2.83815e-05	3.39175e-05	4.37547e-05
Azovibrio	1.3055e-05	8.92817e-06	1.42965e-05	1.1187e-05	1.02824e-05	9.85549e-06	9.02837e-06	9.65973e-06	1.84266e-05	1.11712e-05	1.03741e-05	1.06421e-05	1.25197e-05	1.07899e-05	1.06142e-05	1.01049e-05	1.22314e-05	1.14341e-05	1.1917e-05	9.20412e-06	1.0441e-05	9.82025e-06	9.64633e-06	1.24931e-05
Babjeviella	0	0	0	0	0	0	0	7.01184e-08	0	1.45678e-07	0	0	0	2.15156e-07	2.87461e-07	3.79003e-07	0	0	1.05556e-07	0	0	6.2465e-07	0	0
Bacilliculturomica	0	1.0379e-07	0	1.04523e-07	0	1.01552e-07	2.05195e-07	0	0	0	2.97497e-07	9.17865e-08	1.84318e-07	0	0	2.87993e-07	0	0	1.48612e-07	0	0	0	0	0
Bacillus	0.000421728	0.000533591	0.0007166	0.000272907	0.000705172	0.000407905	0.000312725	0.000781467	0.00105169	0.001542	0.000528224	0.00158676	0.000989974	0.0028014	0.000806829	0.000959403	0.00137685	0.00227572	0.0020349	0.00297193	0.000877486	0.00442691	0.00307347	0.00129385
Bacterioplanes	5.04828e-07	1.17999e-06	4.58209e-07	5.86877e-07	5.27706e-07	3.65691e-07	0	2.69502e-07	1.56542e-06	2.85954e-07	4.56435e-07	1.11263e-06	2.44614e-07	9.23569e-07	1.17435e-06	1.47758e-06	5.77263e-07	1.47189e-06	1.28836e-06	9.63689e-07	4.20658e-07	2.1191e-06	1.45244e-06	1.63322e-06
Bacteriovorax	3.16663e-06	4.15144e-06	5.69799e-06	4.82657e-06	3.82576e-06	2.69309e-06	3.96058e-06	1.98501e-06	5.38878e-06	2.70325e-06	7.57868e-06	4.72639e-06	4.04857e-06	5.52984e-06	8.40384e-06	6.16797e-06	3.25282e-06	3.37154e-06	3.46674e-06	5.33385e-06	3.28325e-06	4.46276e-06	4.22228e-06	5.47305e-06
Bacteroides	5.44855e-05	5.55798e-05	6.32654e-05	5.81977e-05	5.27268e-05	6.03204e-05	5.78159e-05	4.77313e-05	5.29196e-05	6.74483e-05	5.50658e-05	5.43838e-05	5.6954e-05	5.5793e-05	6.78399e-05	6.10835e-05	5.74504e-05	5.09546e-05	5.35208e-05	5.31408e-05	6.20577e-05	4.34169e-05	5.24392e-05	5.56882e-05
Badnavirus	1.16536e-07	1.01129e-07	9.20523e-08	0	0	0	0	9.26255e-08	7.3293e-07	5.26731e-07	0	4.64837e-07	8.64703e-08	1.83814e-06	3.82775e-07	9.72775e-08	7.88747e-07	8.13051e-07	9.32004e-07	1.8916e-06	7.54856e-07	2.31153e-06	1.21007e-06	4.74153e-07
Baekduia	6.45472e-05	7.24431e-05	6.47006e-05	6.98926e-05	8.95501e-05	9.48342e-05	8.24249e-05	8.62328e-05	9.41244e-05	0.000104341	9.78515e-05	0.0001001	0.000111334	9.08965e-05	0.000115922	0.000109409	0.000105257	9.26453e-05	0.000102711	0.000103934	0.000106904	0.000119224	0.000114813	0.000127493
Baia	2.08303e-06	1.27432e-06	1.70727e-06	2.02111e-06	8.50747e-07	1.48228e-06	6.73819e-07	1.50165e-06	9.68611e-07	2.15342e-06	9.85294e-07	9.29767e-07	7.67457e-07	9.82451e-07	1.94176e-06	1.15618e-06	8.4524e-07	1.26958e-06	3.62271e-07	5.52099e-07	3.0821e-06	1.59821e-06	6.00504e-07	1.25443e-06
Baikalvirus	0	9.28003e-08	0	0	0	0	0	0	0	0	0	0	0	0	3.3819e-07	0	0	0	4.70606e-07	0	0	0	1.01831e-07	0
Balnearium	2.60901e-07	0	2.89772e-07	4.51555e-07	3.92691e-07	0	3.83479e-07	2.16034e-07	2.11903e-07	7.15023e-08	3.68357e-07	0	6.42577e-08	4.53877e-08	1.07262e-07	6.58631e-08	1.91042e-07	2.25671e-07	4.51782e-07	4.54946e-07	8.82482e-08	0	3.32908e-07	1.1891e-06
Balneatrix	4.36566e-06	3.47819e-06	3.04457e-06	3.15732e-06	2.82146e-06	1.77133e-06	3.93443e-06	3.2034e-06	2.25291e-06	2.19987e-06	2.80628e-06	2.2907e-06	3.56263e-06	3.05056e-06	2.81071e-06	3.88387e-06	1.35331e-06	2.94594e-06	2.25398e-06	3.50922e-06	1.54565e-06	2.94999e-06	2.56317e-06	2.37645e-06
Balneicella	5.69232e-07	0	0	0	1.9631e-07	2.05812e-07	1.03965e-07	7.2141e-08	1.49498e-07	7.56675e-08	0	6.7726e-08	1.86776e-07	9.05578e-08	6.97722e-08	3.09777e-07	4.99457e-07	4.10445e-07	2.19312e-07	2.68226e-07	0	0	4.52755e-07	3.84022e-07
Balneola	8.10199e-06	6.23987e-06	5.07091e-06	9.37856e-06	7.66806e-06	6.73851e-06	4.52187e-06	5.8455e-06	9.86015e-06	9.34096e-06	1.4494e-05	9.14766e-06	1.09029e-05	8.79731e-06	1.15808e-05	1.07769e-05	1.09075e-05	9.99851e-06	9.26005e-06	7.58997e-06	1.12829e-05	6.22033e-06	8.76296e-06	8.01813e-06
Bantamvirus	0	0	0	0	0	0	4.1039e-07	0	0	0	0	0	0	0	0	0	0	0	0	0	0	0	0	0
Baoshanvirus	0	6.11285e-07	3.55059e-08	3.78274e-08	0	0	0	0	0	0	0	0	0	0	0	0	0	0	0	0	0	0	0	0
Bariatricus	2.33071e-07	0	0	0	0	0	0	1.08734e-07	0	0	7.12154e-07	0	1.01509e-07	6.19973e-07	0	3.17209e-07	0	3.2706e-07	3.27378e-07	0	0	0	0	0
Barnesiella	1.12706e-06	2.43155e-06	8.68592e-07	2.25328e-06	1.19642e-06	1.67799e-06	2.64554e-06	1.0803e-06	1.2913e-06	1.68713e-06	8.25191e-07	1.20909e-06	4.64694e-07	7.1338e-07	6.04502e-07	9.93013e-07	1.2232e-06	0	1.10692e-06	1.79433e-06	0	1.65118e-07	2.25163e-07	7.87833e-07
Barnyardvirus	0	3.98765e-07	0	5.55809e-07	0	0	0	0	1.63811e-07	8.38038e-08	0	3.75042e-07	0	0	0	7.24815e-07	7.25699e-07	7.05209e-07	3.3325e-07	3.58904e-07	4.78305e-07	3.44523e-07	0	9.25096e-07
Barrientosiimonas	2.58318e-06	1.8842e-06	2.59016e-06	1.71725e-06	3.83476e-06	2.44509e-06	2.23752e-06	2.03006e-06	2.20262e-06	1.72235e-06	2.32384e-06	1.40243e-06	1.24754e-06	1.7816e-06	3.47256e-06	1.97151e-06	1.62862e-06	2.54081e-06	6.91214e-07	1.62576e-06	3.29534e-06	4.48696e-06	4.07133e-06	4.26423e-06
Bartheletia	0	0	0	0	0	0	0	0	0	3.07648e-07	0	0	0	0	0	0	0	0	0	0	0	0	0	0
Bartonella	2.951e-06	4.03513e-06	3.56333e-06	4.55546e-06	3.84633e-06	2.6095e-06	3.50612e-06	4.62878e-06	5.17738e-06	3.19715e-06	3.31418e-06	2.26468e-06	2.2959e-06	3.41112e-06	3.79609e-06	4.65374e-06	6.00952e-06	5.18329e-06	4.89005e-06	5.47118e-06	3.88668e-06	1.66027e-06	3.03533e-06	2.99895e-06
Basidiobolus	3.16809e-06	2.73557e-06	3.56714e-06	2.2284e-06	4.96374e-06	4.12084e-06	3.02379e-06	4.64303e-06	5.16647e-06	6.08719e-06	3.72058e-06	9.4851e-06	4.01858e-06	1.54505e-05	5.69429e-06	5.87276e-06	7.01491e-06	7.42362e-06	9.29899e-06	1.46268e-05	4.28977e-06	2.83094e-05	1.81228e-05	5.18206e-06
Basilea	2.30005e-07	2.0758e-07	5.45372e-07	0	5.07234e-07	3.93773e-07	2.02059e-07	2.14265e-07	1.37209e-06	2.05099e-07	2.89966e-07	3.54684e-07	9.53121e-07	3.88105e-07	2.91784e-07	2.54856e-07	8.94826e-07	0	3.09963e-07	2.98881e-07	1.16116e-07	3.73982e-07	2.37541e-07	2.74301e-07
Bastillevirus	0	4.20695e-07	0	0	0	0	0	0	0	0	0	0	0	0	0	0	0	0	0	0	0	0	0	0
Batrachochytrium	5.23067e-07	0	1.1568e-06	0	1.17159e-06	4.49368e-07	9.26426e-07	1.73171e-06	4.61341e-06	4.09793e-06	1.70851e-06	5.32886e-06	2.75227e-06	7.13158e-06	3.33704e-06	2.46322e-06	3.36141e-06	4.17375e-06	5.60269e-06	1.0445e-05	3.99926e-06	1.81563e-05	9.72124e-06	3.5741e-06
Baudoinia	2.2127e-07	3.99394e-07	0	0	4.92438e-07	0	9.87014e-08	9.49705e-08	9.74573e-08	0	0	0	0	3.72155e-07	0	0	0	0	0	0	0	0	0	0
Bauldia	0.000103281	0.000111544	0.000102252	9.97129e-05	8.30855e-05	7.55511e-05	9.29624e-05	9.03095e-05	0.000116712	0.00011143	0.000119965	0.000115912	0.000139727	0.000110996	0.000116449	0.000118233	0.000232258	0.000187985	0.000155394	0.000153417	8.18903e-05	7.45975e-05	7.75386e-05	0.000104327
Bavariicoccus	0	0	0	0	0	0	0	0	0	0	0	0	0	0	0	0	0	0	0	0	0	3.59348e-07	0	0
Baxtervirus	0	3.37183e-07	0	0	0	0	0	0	0	0	0	6.97578e-08	1.77796e-07	5.22449e-08	2.26708e-07	1.50911e-07	3.67101e-07	0	0	0	1.35767e-07	0	6.65817e-08	1.895e-07
Bdellovibrio	3.06877e-05	4.98511e-05	5.45486e-05	5.1977e-05	5.55073e-05	4.85969e-05	5.22344e-05	4.39028e-05	5.38066e-05	4.95747e-05	4.7068e-05	4.86662e-05	5.94022e-05	4.22451e-05	5.89004e-05	6.37556e-05	5.67028e-05	6.17795e-05	6.75336e-05	5.88973e-05	4.61879e-05	5.23187e-05	4.23331e-05	6.30503e-05
Beauveria	1.18111e-07	7.23672e-08	7.49653e-07	0	3.6786e-07	6.77583e-07	1.0537e-07	1.01387e-07	2.38726e-07	7.15023e-08	1.70989e-07	1.58265e-07	0	6.23104e-08	2.91346e-07	4.96578e-07	5.92444e-07	1.61194e-07	3.6434e-07	1.27686e-06	6.48884e-07	2.15972e-06	3.72285e-07	2.6271e-07
Beggiatoa	2.81035e-05	2.68251e-05	3.10091e-05	2.97475e-05	3.11335e-05	2.52016e-05	2.76373e-05	2.94826e-05	2.27654e-05	2.99094e-05	3.0889e-05	2.84609e-05	2.4063e-05	2.14854e-05	2.61188e-05	2.59056e-05	2.88819e-05	3.13374e-05	2.31417e-05	2.27572e-05	2.88494e-05	1.8916e-05	2.17498e-05	2.55807e-05
Begomovirus	0	0	0	0	7.01589e-08	9.52834e-08	0	0	9.34741e-07	3.11846e-07	0	2.12897e-07	2.13762e-07	8.53965e-07	8.87226e-08	0	1.00406e-07	1.16325e-07	3.44704e-07	5.39218e-07	1.99926e-07	1.64898e-06	4.5319e-07	0
Beijerinckia	4.88508e-05	5.54378e-05	4.90042e-05	5.9528e-05	4.45851e-05	4.35981e-05	4.83661e-05	4.67792e-05	4.09148e-05	4.94167e-05	5.49035e-05	4.62599e-05	5.50549e-05	5.09441e-05	4.53263e-05	4.64171e-05	5.86741e-05	6.71299e-05	5.36488e-05	5.05096e-05	3.99926e-05	4.0003e-05	4.63419e-05	5.05138e-05
Bellamyvirus	0	0	0	0	0	0	0	0	0	0	0	0	0	0	0	0	3.60719e-07	0	0	0	0	0	0	0
Belliella	1.91308e-06	1.51074e-06	2.40221e-06	5.44594e-07	8.86028e-07	9.62768e-07	2.2383e-06	5.54341e-07	1.46223e-06	3.1309e-06	1.32612e-06	2.95955e-06	2.8407e-06	1.8734e-06	1.46721e-06	1.98797e-06	2.62274e-06	2.54886e-06	1.459e-06	7.88504e-07	5.84303e-06	1.46143e-06	1.0084e-06	6.72194e-07
Bellilinea	1.74302e-05	1.65399e-05	1.59057e-05	1.71345e-05	1.07415e-05	1.50349e-05	9.6886e-06	1.10141e-05	2.43133e-05	2.38284e-05	3.1136e-05	2.47873e-05	2.72249e-05	1.66817e-05	2.68857e-05	2.16181e-05	2.44208e-05	2.63229e-05	2.37793e-05	2.1091e-05	2.60987e-05	2.06612e-05	2.08364e-05	2.21731e-05
Belnapia	3.64613e-05	4.32012e-05	3.52013e-05	3.81453e-05	3.21856e-05	2.77691e-05	3.79769e-05	3.24377e-05	3.1209e-05	3.13399e-05	3.30418e-05	3.1569e-05	2.87254e-05	2.96546e-05	2.92833e-05	3.40088e-05	3.05743e-05	3.5982e-05	3.32317e-05	3.59214e-05	3.65864e-05	2.75168e-05	2.87921e-05	3.57476e-05
Bendigovirus	0	0	2.09053e-07	5.03774e-07	0	1.02906e-07	0	9.09553e-07	2.27785e-07	5.5221e-07	5.81076e-08	1.65107e-07	1.77394e-07	8.50051e-07	1.68695e-06	4.65269e-06	0	0	0	0	0	5.22168e-07	0	0
Bequatrovirus	0	0	0	0	5.62431e-08	0	0	0	6.36292e-08	0	0	0	5.78851e-08	0	2.37571e-07	1.20592e-07	0	0	0	0	0	0	0	0
Bergeriella	0	2.26649e-07	1.65694e-07	1.76528e-07	0	0	4.1153e-07	0	0	0	4.187e-07	2.12994e-07	2.91759e-07	0	7.98504e-08	0	0	0	0	1.16231e-07	0	0	9.61735e-08	0
Bergeyella	1.10901e-06	2.1243e-06	1.09099e-06	1.27848e-06	1.56562e-06	9.50271e-07	2.76213e-06	1.70723e-06	1.86361e-06	1.34603e-06	1.62422e-06	1.69684e-06	2.04929e-06	1.05684e-06	1.1885e-06	2.74198e-06	1.88234e-06	2.2876e-07	1.44968e-06	1.00736e-06	2.94944e-06	8.52795e-07	1.1497e-06	7.67167e-07
Bermanella	9.93212e-07	8.57395e-08	1.44781e-07	2.8802e-07	4.43831e-07	5.78446e-07	6.42813e-07	3.65153e-07	3.77673e-07	7.71624e-07	1.09226e-07	1.93199e-07	3.687e-07	3.00883e-07	5.31236e-07	1.66157e-07	4.36363e-07	4.08825e-07	0	1.51606e-07	6.21467e-07	4.74097e-07	6.0955e-07	3.5124e-07
Bernardetia	3.07115e-07	1.53223e-06	1.11869e-06	8.20208e-07	8.66851e-07	8.96095e-07	1.45912e-06	7.79136e-07	4.71097e-07	1.90849e-06	1.21398e-06	1.71598e-06	6.37425e-07	1.03315e-06	5.82908e-07	1.35387e-06	1.83356e-06	9.30596e-07	8.96392e-07	9.59642e-07	1.05157e-06	8.85074e-07	1.17294e-06	1.70965e-06
Bertelyvirus	8.61101e-08	3.88573e-08	0	0	0	0	0	0	1.64602e-07	6.98469e-07	1.95432e-07	2.40544e-07	3.45029e-08	1.33829e-07	4.3721e-08	5.36985e-07	4.04609e-07	0	0	0	5.19107e-07	0	0	0
Betabaculovirus	9.50019e-08	0	0	0	0	0	0	0	3.34745e-07	0	0	7.58236e-08	0	5.1677e-07	0	7.93023e-08	0	1.22648e-07	2.45534e-07	0	9.5922e-08	1.81624e-07	1.88166e-07	0
Betaentomopoxvirus	0	1.72551e-06	0	0	0	0	0	0	0	0	0	0	0	0	0	0	0	3.22388e-07	0	5.97762e-07	0	1.19353e-07	0	0
Betterkatzvirus	0	1.99697e-07	0	0	0	0	0	0	0	0	0	0	0	2.92307e-07	4.46202e-07	0	0	0	0	0	1.11707e-07	0	0	0
Beutenbergia	2.43778e-06	4.09322e-06	3.83216e-06	2.10316e-06	5.82811e-06	6.21347e-06	5.59835e-06	4.441e-06	4.13856e-06	1.93355e-06	4.43899e-06	2.51019e-06	3.6562e-06	2.6556e-06	2.46369e-06	2.32001e-06	3.17206e-06	4.18501e-06	3.9061e-06	3.29766e-06	1.17724e-06	1.69968e-06	1.76957e-06	1.85511e-06
Bhargavaea	1.2809e-06	1.10227e-06	1.67034e-06	2.00971e-06	2.74155e-06	2.27878e-06	2.5364e-06	8.46621e-07	2.3333e-06	8.91613e-07	2.85723e-06	1.5158e-06	1.70402e-06	1.52135e-06	1.61895e-06	1.64648e-06	1.95561e-06	1.728e-06	1.19989e-06	1.74693e-06	1.89093e-06	1.74121e-06	2.33694e-06	2.50486e-06
Bibersteinia	5.69284e-07	8.01587e-07	3.60203e-07	5.74177e-07	8.89423e-07	8.0511e-07	5.25832e-07	5.64396e-07	5.8321e-07	5.84239e-07	9.76191e-07	7.14425e-07	8.07638e-07	1.13327e-06	6.89326e-07	5.84727e-07	8.22424e-07	3.05641e-07	2.5381e-07	3.52612e-07	0	1.87746e-07	6.16688e-07	1.85202e-07
Bifidobacterium	1.91085e-05	1.78939e-05	2.59789e-05	1.8181e-05	2.67124e-05	2.56411e-05	2.06211e-05	4.33188e-05	4.93892e-05	7.91532e-05	3.41742e-05	8.97105e-05	5.82009e-05	0.00016519	5.31174e-05	5.09625e-05	7.79478e-05	0.000104899	0.000118242	0.000147522	4.83176e-05	0.000255876	0.00016339	7.05593e-05
Bifiguratus	1.4712e-06	1.87603e-06	1.39893e-06	4.79215e-07	5.24925e-07	1.44028e-06	8.32792e-07	1.58156e-06	1.23332e-06	2.19709e-06	1.76888e-06	3.45964e-06	3.54088e-06	5.09448e-06	1.37974e-06	1.74498e-06	3.74997e-06	4.36023e-06	3.17535e-06	4.68398e-06	1.58882e-06	1.05601e-05	7.62433e-06	1.75974e-06
Bifseptvirus	0	0	7.60643e-07	0	0	0	0	0	0	0	0	0	0	0	1.46664e-07	0	0	0	0	0	1.1031e-07	3.58058e-07	2.59668e-07	7.27388e-07
Bilophila	1.24957e-06	2.74018e-06	1.01267e-06	1.06523e-06	8.65542e-07	2.13124e-06	1.88953e-06	5.84084e-07	1.45184e-06	1.53471e-06	9.34194e-07	2.96673e-06	2.81767e-06	1.76667e-06	2.56142e-06	1.29434e-06	7.27311e-07	7.28942e-07	0	1.34113e-07	8.1938e-07	5.91441e-07	7.98103e-07	1.71989e-06
Bimuria	1.34176e-06	9.42429e-07	1.24407e-06	1.21113e-06	1.27961e-06	1.2504e-06	1.92801e-06	1.25743e-06	9.55104e-07	5.22486e-07	1.13063e-06	9.01324e-07	1.02201e-06	1.26702e-06	1.11007e-06	8.55933e-07	2.14053e-07	5.16387e-07	0	4.98838e-07	4.63506e-07	1.29198e-06	2.69022e-07	2.08085e-07
Bingvirus	1.83946e-06	7.65012e-06	2.41317e-06	2.36372e-06	3.06329e-07	3.25142e-07	1.06223e-06	3.14444e-07	7.58454e-06	5.41078e-06	1.73927e-06	5.34361e-06	3.74149e-06	3.58101e-06	4.213e-06	3.62233e-06	1.14486e-06	6.31911e-07	6.87526e-07	1.62334e-06	2.32526e-06	2.26495e-06	1.01235e-07	1.11994e-06
Biostraticola	1.95736e-06	2.8204e-06	2.51024e-06	1.81129e-06	2.28152e-06	1.09904e-06	2.13928e-06	1.40784e-06	1.92071e-06	8.11447e-07	2.01644e-06	8.86033e-07	1.68717e-06	2.33763e-06	6.52252e-07	1.12115e-06	3.48326e-06	1.86603e-06	2.2353e-06	1.37955e-06	7.33103e-07	7.26824e-07	7.10011e-07	1.26362e-06
Bipolaris	3.65501e-07	1.9659e-07	7.45623e-08	0	2.65146e-07	1.82141e-07	5.49385e-06	1.04207e-06	2.4478e-07	1.34548e-06	4.8842e-07	1.13499e-07	2.91554e-07	1.07718e-06	8.27404e-07	1.82395e-07	2.21625e-06	1.48468e-07	3.70509e-07	5.93655e-07	6.02615e-07	1.53504e-06	8.37564e-07	6.00176e-07
Bittarella	1.3045e-07	2.98287e-07	2.27547e-07	3.93115e-07	7.23727e-07	4.60774e-07	3.04861e-07	0	0	9.16912e-08	0	0	8.75511e-08	7.9904e-08	0	0	0	1.41045e-07	1.1889e-07	3.92281e-07	3.30931e-07	0	0	0
Bixzunavirus	8.24535e-07	2.14296e-07	4.90542e-08	8.66084e-07	8.50676e-08	2.44897e-07	0	0	4.24648e-07	8.1675e-07	9.54e-08	8.19461e-07	8.67924e-07	1.18479e-06	4.21882e-07	4.4085e-07	0	2.83875e-07	0	1.3076e-07	2.23413e-07	3.58058e-07	1.08195e-07	2.43052e-07
Bizionia	3.79981e-06	3.20144e-06	4.37501e-06	2.44732e-06	4.3023e-06	2.80607e-06	2.77634e-06	2.65518e-06	1.95205e-06	3.55169e-06	1.1612e-06	2.51447e-06	3.50683e-06	2.25892e-06	4.10658e-06	1.80396e-06	3.60319e-06	1.49253e-06	1.22039e-06	6.39001e-07	1.26947e-06	1.28717e-06	1.1196e-06	2.63379e-06
Bjornvirus	1.13468e-07	1.68191e-08	7.14236e-07	1.6591e-07	0	0	1.22025e-08	1.38938e-08	2.29825e-07	0	0	0	0	2.80654e-08	3.3819e-08	1.90042e-07	3.73409e-07	2.12964e-07	2.15416e-07	1.04946e-05	1.18033e-05	3.00841e-05	8.59846e-06	7.06746e-05
Blastochloris	7.88926e-05	0.000101753	9.17917e-05	9.97161e-05	8.64268e-05	7.38342e-05	8.54881e-05	9.29292e-05	7.79868e-05	7.75085e-05	8.79879e-05	8.84899e-05	9.68011e-05	0.000102215	8.88062e-05	9.52912e-05	8.88661e-05	8.59766e-05	8.53294e-05	7.3932e-05	7.5468e-05	6.29181e-05	7.29984e-05	7.5812e-05
Blastocladiella	0	0	0	0	0	0	0	0	4.50241e-08	1.36732e-07	0	2.44764e-07	0	0	0	0	0	0	0	0	0	4.88578e-08	0	0
Blastococcus	0.000120668	0.000152235	0.000213663	0.000156279	0.000209797	0.000226366	0.000229685	0.000224791	0.000156143	0.000156819	0.000155329	0.000156958	0.00014573	0.000145577	0.000165501	0.000150826	0.000178913	0.000156398	0.000169813	0.00016451	0.000144186	0.000118573	0.000139813	0.000140955
Blastomonas	2.58139e-05	2.33123e-05	2.87881e-05	3.31332e-05	2.99637e-05	2.95353e-05	3.39328e-05	3.17009e-05	4.64241e-05	2.968e-05	2.82584e-05	2.97171e-05	2.44155e-05	2.23795e-05	2.95628e-05	2.73924e-05	3.7922e-05	3.71577e-05	3.71366e-05	4.32887e-05	3.4375e-05	2.56293e-05	2.82524e-05	3.8858e-05
Blastomyces	0	0	6.06198e-08	0	2.9166e-07	0	1.79251e-07	5.59901e-08	0	1.16325e-07	0	8.01813e-08	0	5.52182e-08	1.12058e-07	3.8893e-07	3.63411e-07	1.29696e-07	2.62697e-07	4.8864e-07	1.49627e-06	8.26138e-07	4.28184e-07	0
Blastopirellula	7.75619e-05	8.89774e-05	9.745e-05	9.77891e-05	9.10856e-05	8.08014e-05	7.98518e-05	8.18546e-05	7.81538e-05	9.70318e-05	8.77001e-05	8.18561e-05	9.34734e-05	6.98243e-05	9.23912e-05	8.75423e-05	6.72683e-05	7.87239e-05	0.000106747	6.23622e-05	7.00345e-05	5.33578e-05	6.65732e-05	6.71695e-05
Blattabacterium	1.19728e-07	9.86004e-08	6.44727e-07	1.84738e-07	1.70135e-07	0	3.10313e-07	3.17014e-07	2.68837e-07	5.20269e-07	4.89317e-07	3.29407e-07	4.13473e-07	9.56597e-08	1.01219e-07	1.51996e-07	4.94585e-07	3.93998e-07	7.49022e-07	1.78454e-06	3.15564e-07	2.49394e-07	2.12073e-07	1.00006e-07
Blautia	2.80973e-06	3.85832e-06	3.32624e-06	5.30675e-06	1.89399e-06	1.8936e-06	4.98981e-06	2.11963e-06	3.73209e-06	4.77211e-06	4.36848e-06	5.56169e-06	4.39183e-06	3.82436e-06	4.92727e-06	3.73651e-06	3.37516e-06	3.99546e-06	3.41422e-06	3.46e-06	4.49552e-06	4.22686e-06	4.10437e-06	4.57597e-06
Blumeria	1.02826e-07	0	0	0	0	0	3.95636e-07	8.82667e-08	0	1.83382e-07	0	0	2.95948e-07	0	0	0	0	1.32748e-07	1.32877e-07	0	0	2.94871e-07	1.01831e-07	0
Blyttiomyces	5.60524e-07	3.41557e-07	8.88703e-07	4.01603e-07	1.20367e-06	6.65341e-08	3.96071e-07	7.97493e-07	2.36214e-06	1.89439e-06	1.70605e-06	3.37599e-06	1.32433e-06	4.26485e-06	4.5575e-07	1.32846e-06	2.32731e-06	1.47954e-06	1.41644e-06	3.10968e-06	9.77773e-07	8.01063e-06	2.77815e-06	5.74105e-07
Bogoriella	1.06527e-06	3.07231e-07	5.43248e-07	1.33818e-06	1.23227e-06	5.85108e-07	2.25756e-06	7.74508e-07	7.24096e-07	4.576e-07	1.94933e-06	3.62274e-07	7.01382e-07	9.62352e-07	7.51888e-07	1.40637e-06	5.5492e-07	3.80345e-07	2.35329e-07	6.26036e-07	1.34268e-06	1.0993e-07	5.73748e-07	3.80928e-07
Bombella	5.54658e-07	8.68993e-07	7.72397e-07	8.21856e-07	1.83062e-07	1.75408e-07	3.34902e-07	7.66938e-07	1.02655e-07	7.57202e-07	3.64087e-08	3.48978e-07	7.74097e-07	2.18888e-07	1.73885e-07	3.75952e-07	0	4.51343e-07	1.48612e-07	0	1.17664e-07	0	0	4.63795e-08
Bombiscardovia	0	4.15159e-07	0	1.1682e-07	0	0	0	0	8.89605e-07	3.9279e-07	1.1515e-06	4.52972e-07	2.39445e-07	0	5.20763e-07	2.13028e-07	1.41151e-07	0	0	3.03213e-07	2.59554e-07	1.21082e-07	0	0
Bondarzewia	1.85961e-07	1.01129e-07	1.75322e-07	4.54983e-07	0	1.31229e-06	0	8.71502e-07	5.5204e-07	1.0145e-06	1.13944e-06	1.56413e-06	1.07016e-06	2.81777e-06	1.25093e-06	6.87951e-07	2.16797e-06	3.1302e-06	6.65919e-07	3.14835e-06	9.00933e-07	3.36809e-06	2.13059e-06	1.01624e-06
Bongovirus	0	0	0	0	0	0	0	0	0	2.94104e-07	8.76349e-08	0	4.88658e-07	7.89748e-08	5.8495e-07	6.88284e-08	0	1.15329e-07	0	0	0	0	2.01293e-07	1.11634e-07
Bonnellvirus	0	0	0	0	0	0	0	0	0	0	0	0	0	0	0	0	0	0	0	0	5.11584e-07	2.42165e-07	0	0
Bonordeniella	0	6.25066e-07	8.1046e-08	3.75766e-07	7.82066e-07	9.83247e-09	1.89592e-07	7.93308e-07	8.36862e-08	0	5.17218e-07	5.61987e-07	2.34595e-07	7.1695e-07	7.04562e-08	5.55665e-07	0	1.22648e-07	2.45534e-07	1.00309e-06	1.8244e-07	2.63718e-07	3.32908e-07	4.63375e-07
Bordetella	0.000256636	0.000258791	0.000290123	0.000265114	0.000237357	0.000238879	0.000240489	0.000233377	0.00026891	0.000224316	0.000251827	0.000229711	0.000219179	0.000197241	0.000214105	0.000221291	0.000246797	0.000253902	0.000242123	0.0002244	0.000228491	0.000201429	0.000227099	0.000259337
Borrelia	1.09252e-07	0	4.63342e-07	4.18092e-07	0	3.21582e-07	0	0	0	0	9.91658e-08	9.17865e-08	0	0	0	3.9999e-07	0	1.16886e-06	0	0	2.2889e-07	3.01977e-07	1.04285e-07	0
Borreliella	0	0	0	0	0	0	0	0	0	0	0	0	0	0	0	0	0	0	0	0	3.39416e-07	0	1.10969e-07	0
Bosea	0.00029487	0.000297991	0.000293977	0.00032244	0.000257985	0.000251221	0.000265044	0.000377981	0.000293413	0.000262974	0.000320178	0.00027797	0.000290945	0.000250433	0.000269263	0.000249821	0.000339955	0.000386502	0.000330071	0.000321845	0.000309438	0.00025874	0.000296503	0.000335403
Boseongicola	1.14015e-05	1.04806e-05	1.0492e-05	1.52185e-05	1.0832e-05	9.52483e-06	1.10628e-05	1.08088e-05	9.79587e-06	1.05308e-05	1.12375e-05	1.21309e-05	1.04174e-05	9.37217e-06	8.23546e-06	9.86832e-06	1.09067e-05	9.327e-06	7.20984e-06	6.1156e-06	8.60921e-06	8.11229e-06	8.96669e-06	8.41044e-06
Botryobacter	1.90521e-05	1.47044e-05	2.24352e-05	2.021e-05	1.73979e-05	2.03758e-05	2.0324e-05	1.81655e-05	2.56251e-05	2.40229e-05	2.52144e-05	2.36716e-05	2.44441e-05	2.07765e-05	2.44337e-05	2.29694e-05	2.30232e-05	1.78792e-05	2.41511e-05	2.243e-05	4.30114e-05	1.57824e-05	1.9813e-05	2.5614e-05
Botryobasidium	1.70832e-06	1.48615e-06	1.06601e-06	1.02058e-06	1.52842e-06	1.73822e-06	7.48283e-07	2.11949e-06	9.20773e-07	2.15662e-06	1.10099e-06	1.53733e-06	1.41723e-06	3.56185e-06	1.11181e-06	2.56113e-06	9.3892e-07	1.78827e-06	2.43957e-06	2.09827e-06	8.39033e-07	2.48142e-06	1.73715e-06	5.82218e-07
Botryosphaeria	2.46202e-07	6.95689e-07	2.43138e-07	1.65495e-07	8.2965e-07	8.03954e-08	8.59453e-07	1.10333e-07	9.07153e-07	1.98337e-07	6.07143e-07	4.35569e-07	4.62295e-07	8.99803e-07	1.49719e-07	3.3613e-07	3.56422e-07	1.90517e-06	3.32192e-07	1.93187e-06	7.36681e-07	1.29858e-06	1.25489e-06	2.01064e-07
Botryotinia	0	0	0	3.01662e-07	9.07388e-08	0	4.45566e-07	0	0	0	3.01464e-07	2.82802e-07	1.86776e-07	5.50689e-07	4.65617e-07	0	8.01101e-07	1.50448e-07	3.18156e-07	4.30061e-07	0	3.34188e-07	6.95568e-07	0
Botrytis	1.09732e-06	1.92753e-06	1.6593e-06	1.41675e-06	1.4276e-06	1.28587e-06	2.40055e-06	2.63628e-06	1.92804e-06	2.38214e-06	1.227e-06	2.51752e-06	1.04939e-06	4.23391e-06	1.10873e-06	1.27289e-06	3.78112e-06	1.81931e-06	2.26655e-06	3.75582e-06	1.14316e-06	8.86958e-06	4.05055e-06	1.15952e-06
Boudabousia	8.09276e-08	1.46075e-07	2.90896e-07	6.90761e-07	6.3013e-08	0	0	1.78203e-07	1.84065e-07	8.47147e-08	4.41938e-07	4.15277e-07	7.61314e-08	7.38243e-08	3.12458e-07	2.44883e-07	0	0	1.22767e-07	0	0	0	3.35429e-07	0
Bowdeniella	1.53336e-07	6.70192e-07	2.52004e-07	3.80536e-07	1.09671e-06	1.10494e-06	8.43266e-07	1.97439e-07	8.72945e-08	8.95061e-07	6.97833e-08	4.43798e-07	2.42171e-07	6.71912e-07	4.17076e-07	5.92065e-07	5.93867e-07	4.33984e-07	1.42969e-07	2.88547e-07	1.31714e-07	8.20921e-07	1.60289e-07	3.18972e-07
Bowmanella	2.32801e-06	3.67807e-06	2.53483e-06	3.20947e-06	1.68762e-06	3.71255e-06	2.34095e-06	1.09527e-06	2.904e-06	2.51993e-06	3.22123e-06	1.97209e-06	2.87369e-06	2.37348e-06	2.87813e-06	1.98724e-06	2.64633e-06	4.97009e-06	2.08899e-06	3.78459e-06	2.49725e-06	2.24771e-06	3.9058e-06	2.3044e-06
Brachybacterium	6.02949e-06	8.00674e-06	8.06534e-06	9.1483e-06	8.14607e-06	8.20069e-06	1.07054e-05	7.18517e-06	7.70194e-06	1.04985e-05	7.15318e-06	8.4025e-06	9.13048e-06	1.63019e-05	7.21824e-06	9.71107e-06	3.85075e-06	7.68584e-06	7.84722e-06	5.99805e-06	6.31912e-06	6.53117e-06	5.85065e-06	1.06098e-05
Brachymonas	6.21198e-06	7.48364e-06	7.91898e-06	9.41975e-06	5.66386e-06	9.06142e-06	6.76156e-06	6.47675e-06	1.44428e-05	8.08206e-06	9.89418e-06	7.23586e-06	5.54643e-06	5.86026e-06	5.27284e-06	5.60106e-06	6.00755e-06	1.21033e-05	6.90678e-06	6.35978e-06	9.88377e-06	7.67745e-06	6.62242e-06	6.59457e-06
Brachyspira	1.58209e-06	1.67935e-06	7.07404e-07	1.17091e-06	1.00372e-06	1.41323e-06	1.62138e-06	1.47831e-06	2.75334e-06	2.59292e-06	1.76706e-06	2.19653e-06	2.24516e-06	7.36212e-07	1.50417e-06	1.20293e-06	7.46575e-07	2.8566e-07	3.65477e-07	4.35799e-07	9.10241e-07	7.68023e-07	1.72537e-06	1.12312e-06
Brackiella	0	0	1.06518e-07	0	0	0	4.27255e-07	0	0	0	0	0	0	2.91079e-07	4.54844e-07	0	0	0	0	2.86598e-07	0	0	0	0
Bracovirus	0	2.09404e-07	8.90606e-07	2.57004e-07	5.65807e-07	0	0	1.89941e-07	5.11896e-07	1.03777e-06	0	2.85892e-07	3.83159e-07	3.69259e-07	9.09688e-08	8.4835e-08	1.52178e-07	6.13467e-07	0	1.41253e-06	3.23005e-06	5.81206e-07	9.13312e-07	0
Bradymonas	5.22253e-06	9.03137e-06	8.59896e-06	7.68837e-06	7.23985e-06	8.37053e-06	9.07631e-06	6.37348e-06	5.50632e-06	8.19881e-06	4.2552e-06	5.84073e-06	1.01911e-05	7.20171e-06	8.39577e-06	7.87866e-06	5.40193e-06	6.11306e-06	5.7857e-06	3.58766e-06	3.59641e-06	3.95878e-06	3.32901e-06	2.5412e-06
Bradyrhizobium	0.00941663	0.0177592	0.00918188	0.0108734	0.0114483	0.0108446	0.0154716	0.0168462	0.0140735	0.00818525	0.00832792	0.00894349	0.0104037	0.0117367	0.00750596	0.0108668	0.00857358	0.0107967	0.00907631	0.0097798	0.00682881	0.00906452	0.0115948	0.00927938
Branchiibius	3.44657e-06	3.61168e-06	3.90077e-06	2.66131e-06	6.98022e-06	3.27312e-06	7.54765e-06	5.28676e-06	3.93477e-06	2.32979e-06	2.6494e-06	3.61905e-06	3.28322e-06	5.37999e-06	4.29149e-06	3.44201e-06	1.68513e-06	4.0608e-06	4.14686e-06	4.8973e-06	2.26621e-06	2.55233e-06	5.7311e-06	2.1924e-06
Brasilonema	5.47762e-05	5.48534e-05	5.60337e-05	5.78106e-05	6.25105e-05	6.19177e-05	6.50182e-05	5.16057e-05	4.96947e-05	5.6213e-05	6.04352e-05	6.16923e-05	5.02325e-05	4.95602e-05	4.83424e-05	5.06079e-05	5.97715e-05	5.05459e-05	5.54211e-05	5.38403e-05	6.01896e-05	5.15631e-05	5.22111e-05	5.77534e-05
Bremerella	7.49392e-06	9.00421e-06	1.07297e-05	9.0486e-06	1.00951e-05	8.46054e-06	9.4709e-06	9.16092e-06	6.8425e-06	9.57579e-06	7.62517e-06	8.29462e-06	6.77663e-06	7.46504e-06	8.70911e-06	8.40591e-06	5.91669e-06	6.11619e-06	1.35399e-05	5.24149e-06	6.43615e-06	3.72517e-06	4.6429e-06	6.83337e-06
Brenneria	3.80625e-06	5.50383e-06	3.80536e-06	5.68548e-06	4.06127e-06	5.87856e-06	5.82586e-06	5.47888e-06	3.52655e-06	1.77564e-06	3.38901e-06	3.35721e-06	2.75203e-06	2.8967e-06	2.54259e-06	5.22141e-06	3.78417e-06	2.65454e-06	3.0076e-06	3.18822e-06	4.09701e-06	2.06196e-06	2.71532e-06	2.89098e-06
Breoghania	1.22632e-05	1.71877e-05	1.54752e-05	1.86057e-05	1.27888e-05	1.04576e-05	1.02272e-05	1.11118e-05	1.51185e-05	1.12908e-05	2.02034e-05	1.54582e-05	1.47792e-05	1.20736e-05	1.16328e-05	1.68222e-05	2.50382e-05	2.73052e-05	2.09017e-05	2.01582e-05	1.17266e-05	1.29313e-05	1.52307e-05	1.75832e-05
Brettanomyces	2.34112e-07	0	2.99388e-07	2.12779e-07	0	4.36618e-07	6.96197e-08	6.35819e-08	5.42192e-07	0	0	4.48511e-07	5.69338e-07	6.61448e-07	7.54819e-07	4.40742e-07	5.27692e-07	9.56235e-08	3.41366e-07	2.04883e-07	1.80399e-07	3.4349e-06	7.59418e-07	1.02133e-07
Brevefilum	4.28546e-07	2.91986e-07	4.86633e-07	1.31248e-06	1.08534e-06	5.87634e-07	7.60624e-07	6.01897e-07	1.52465e-06	2.12034e-06	1.49873e-06	1.86035e-06	1.791e-06	6.71821e-07	1.50868e-06	1.3931e-06	4.88494e-07	3.54244e-07	1.06455e-06	5.75166e-07	6.998e-07	1.37104e-06	1.17069e-06	1.0367e-06
Brevibacillus	5.11021e-05	6.93982e-05	5.91202e-05	7.26468e-05	6.09524e-05	6.1823e-05	6.33419e-05	6.10786e-05	5.64371e-05	5.96054e-05	6.01642e-05	4.87644e-05	5.99607e-05	5.7805e-05	6.14125e-05	6.04687e-05	4.87869e-05	4.96558e-05	4.44851e-05	4.87415e-05	5.29703e-05	5.0538e-05	5.13034e-05	4.71512e-05
Brevibacterium	8.8549e-06	9.26473e-06	9.6314e-06	1.11242e-05	1.23512e-05	1.4278e-05	1.28652e-05	1.13364e-05	1.28066e-05	1.57333e-05	1.21367e-05	1.46383e-05	1.06331e-05	9.25743e-06	1.01615e-05	1.2007e-05	8.39638e-06	8.83607e-06	9.10952e-06	7.29066e-06	9.62647e-06	6.20754e-06	7.10492e-06	1.15888e-05
Brevifollis	4.25752e-05	4.15315e-05	4.59394e-05	4.85056e-05	4.60573e-05	4.51768e-05	5.45158e-05	4.89482e-05	4.8781e-05	4.92995e-05	5.2845e-05	5.17285e-05	4.44936e-05	4.0134e-05	4.93322e-05	4.58203e-05	5.04587e-05	4.16906e-05	5.16933e-05	3.73896e-05	3.33624e-05	2.88673e-05	3.57734e-05	4.19966e-05
Brevilactibacter	3.78622e-06	3.77135e-06	2.29419e-06	2.18725e-06	2.65731e-06	3.94408e-06	3.42947e-06	2.50615e-06	2.42541e-06	1.98908e-06	1.86552e-06	1.74606e-06	2.99634e-06	3.61465e-06	2.98068e-06	2.06979e-06	1.62202e-06	1.78883e-06	3.359e-06	1.88465e-06	2.90137e-06	2.2815e-06	2.08178e-06	6.00581e-07
Brevinema	1.58344e-07	9.0667e-08	0	0	0	6.60413e-07	2.16595e-07	5.28357e-07	7.40301e-08	2.58071e-07	1.80392e-07	2.14331e-07	9.49727e-07	2.01113e-07	3.51003e-07	3.44341e-07	0	0	0	0	7.59753e-07	8.18034e-07	2.11059e-07	5.07574e-07
Brevirhabdus	0	7.1615e-07	2.07118e-07	2.43555e-07	3.83479e-07	6.52351e-07	6.92717e-07	5.70494e-07	1.00303e-06	1.66594e-06	8.50455e-07	1.06307e-06	5.16798e-07	5.56327e-07	3.91373e-07	8.62704e-07	1.27075e-06	0	1.60221e-06	8.67326e-07	3.85783e-07	1.21082e-07	8.57049e-07	7.64601e-07
Brevundimonas	0.000167525	0.000193752	0.000199009	0.000218887	0.000239152	0.00022156	0.00027678	0.00024773	0.000172183	0.000166564	0.000171114	0.000153652	0.000162557	0.000157825	0.000167109	0.000191232	0.000178053	0.000185661	0.000167746	0.000159353	0.000154632	0.000124205	0.000164057	0.000162461
Breznakibacter	6.51087e-07	2.02235e-06	4.96937e-07	6.87407e-07	1.39868e-06	7.81827e-07	1.84222e-06	1.3686e-06	4.98151e-07	3.98406e-07	1.55138e-06	6.38719e-07	7.56265e-07	2.0385e-07	1.28401e-07	7.82232e-07	0	6.0212e-07	0	5.85964e-07	4.3977e-07	0	4.23413e-07	9.84991e-07
Bridgettevirus	0	0	3.28952e-07	0	0	0	0	0	0	1.10151e-06	7.61273e-08	0	1.03001e-07	0	1.45183e-07	4.4217e-07	1.69381e-07	1.96236e-07	6.55673e-07	9.25737e-08	0	0	0	0
Brigitvirus	0	0	0	0	0	0	0	0	0	0	0	0	8.86594e-08	0	9.09688e-08	0	0	0	0	0	1.11707e-07	1.05756e-07	1.42434e-06	0
Britbratvirus	0	0	1.50631e-07	0	0	0	0	0	0	0	0	0	0	0	0	4.4217e-07	0	0	0	0	5.38099e-07	0	0	0
Brochothrix	1.39843e-07	0	2.19301e-07	6.355e-08	0	0	0	0	1.50963e-07	1.38759e-07	2.54767e-07	2.33278e-07	1.38081e-06	0	5.22433e-07	7.15276e-08	0	0	0	3.34747e-07	6.12547e-07	5.7527e-07	1.78444e-07	1.65732e-06
Brockia	1.3881e-06	1.67175e-06	1.74917e-06	1.8463e-06	1.19318e-06	2.71435e-06	1.98921e-06	1.23781e-06	6.64463e-07	1.09657e-06	2.01166e-06	9.87424e-07	2.8037e-07	1.68055e-06	5.0784e-07	1.6989e-06	1.41441e-06	0	1.01876e-06	1.83187e-06	1.89607e-06	1.67611e-06	1.62555e-06	1.88502e-06
Bronvirus	0	0	1.7895e-07	0	0	0	0	0	7.60411e-07	5.9193e-07	4.64179e-07	1.64136e-07	7.64333e-07	1.35832e-06	4.72152e-07	3.62812e-07	3.5703e-07	3.61074e-07	3.14011e-07	1.67373e-07	4.63694e-07	1.33675e-07	4.26864e-07	2.43052e-07
Brooklawnia	2.60668e-06	1.4997e-06	3.18326e-06	2.80221e-06	1.98736e-06	2.45232e-06	1.61774e-06	2.13424e-06	3.3454e-06	2.50254e-06	2.9994e-06	4.61049e-06	1.41297e-06	2.35567e-06	2.69696e-06	1.99924e-06	6.61462e-06	4.53012e-06	4.36212e-06	4.14272e-06	1.53933e-06	1.83508e-06	2.15367e-06	2.09934e-06
Brucella	1.2856e-05	1.02192e-05	2.14704e-05	1.41801e-05	1.2078e-05	1.20105e-05	7.24374e-06	1.24768e-05	1.78404e-05	1.13446e-05	1.33427e-05	1.00656e-05	1.40118e-05	9.61013e-06	1.04284e-05	9.15624e-06	1.8469e-05	1.56723e-05	1.96187e-05	1.55701e-05	1.40238e-05	1.06507e-05	1.25499e-05	1.52746e-05
Brujitavirus	0	3.1137e-07	0	0	0	0	0	0	4.81196e-07	0	0	0	0	0	0	0	0	0	0	2.27409e-07	6.71454e-07	9.08118e-08	0	0
Brumimicrobium	2.84525e-06	1.748e-06	3.16831e-06	1.94091e-06	2.34721e-06	1.64039e-06	2.19944e-06	2.39843e-06	3.13752e-06	3.33985e-06	2.72212e-06	2.6536e-06	3.73181e-06	2.04566e-06	2.95407e-06	3.3622e-06	4.67525e-06	3.87973e-06	7.68107e-06	1.93313e-06	1.29103e-05	1.15804e-06	2.7707e-06	2.79427e-06
Brunneoporus	0	0	0	0	0	0	0	0	0	0	0	4.9827e-08	0	0	0	0	6.95673e-08	0	1.61351e-07	7.47202e-08	0	1.79029e-07	4.94607e-07	6.85753e-08
Bruynoghevirus	2.39457e-07	0	6.6198e-07	3.16967e-07	2.58433e-07	0	0	5.07082e-07	9.74573e-08	0	0	0	0	0	9.2135e-08	2.80608e-07	5.62972e-08	0	3.57422e-08	1.18735e-06	4.86781e-06	1.17188e-05	3.72861e-06	2.63892e-05
Bryobacter	0.000126252	0.000148985	0.000134403	0.000128549	0.000147486	0.000141073	0.000147263	0.000168743	8.21971e-05	9.5142e-05	0.000105838	9.78755e-05	9.48277e-05	8.95198e-05	9.42581e-05	0.000109503	8.16631e-05	9.79716e-05	8.95869e-05	7.43257e-05	8.49383e-05	5.23498e-05	5.94224e-05	7.50123e-05
Bryocella	3.95014e-05	8.03754e-05	6.38764e-05	5.48405e-05	9.10431e-05	9.08003e-05	9.61092e-05	0.000116151	1.91735e-05	1.71347e-05	2.05937e-05	1.98687e-05	2.68516e-05	2.83265e-05	2.13663e-05	3.50677e-05	1.99585e-05	1.54653e-05	1.5011e-05	1.55187e-05	1.42555e-05	1.10398e-05	1.54267e-05	1.75089e-05
Buchananella	2.48706e-06	2.14575e-06	2.05926e-06	2.88496e-06	1.20265e-06	3.06109e-06	1.9695e-06	2.04585e-06	1.10536e-06	1.42755e-06	1.60465e-06	1.97762e-06	2.12996e-06	2.25451e-06	9.27494e-07	1.85456e-06	3.67354e-06	2.77212e-06	1.63967e-06	2.18626e-06	1.78463e-06	2.5033e-06	1.24605e-06	2.4449e-06
Buchnera	0	6.57336e-07	1.46201e-07	0	0	0	0	0	0	3.91451e-07	3.54663e-07	0	0	7.9904e-08	0	0	6.14039e-07	0	0	1.31957e-06	2.55792e-07	6.26949e-07	0	0
Budvicia	3.33324e-07	4.81412e-07	2.73122e-07	5.65813e-07	6.64277e-07	1.3213e-06	4.82461e-07	1.21019e-06	9.62394e-07	3.95885e-07	0	2.60779e-07	6.51113e-07	8.96851e-07	2.86366e-07	1.04031e-06	9.73942e-08	1.41259e-06	5.73365e-07	5.52546e-07	1.05474e-06	2.20013e-07	4.39664e-07	8.60647e-07
Burkholderia	0.000797702	0.000878457	0.000894737	0.000951535	0.00237879	0.00167149	0.00147161	0.0016072	0.000994495	0.000832951	0.000861165	0.00130358	0.000825754	0.000780221	0.000964707	0.000970245	0.000994502	0.00116189	0.000906085	0.00120817	0.000994209	0.0011362	0.00151785	0.00165197
Busanvirus	7.04853e-08	2.88586e-07	0	9.68751e-08	0	0	0	0	4.69459e-07	0	6.15285e-07	3.363e-07	0	0	8.35724e-08	0	0	0	0	0	0	0	0	0
Buttersvirus	0	0	0	0	0	0	0	0	1.62644e-07	3.45998e-07	8.93522e-08	2.59043e-07	0	0	0	0	0	0	0	0	0	0	0	0
Buttiauxella	2.75817e-06	1.26868e-06	1.67474e-06	3.01628e-06	1.9003e-06	3.3428e-06	1.31723e-06	2.24477e-06	1.85828e-06	1.34369e-06	1.54648e-06	2.05294e-06	2.04474e-06	7.44965e-07	1.359e-06	1.24693e-06	1.0956e-06	1.0693e-06	8.29474e-07	1.41157e-06	6.07344e-07	1.52887e-06	1.84821e-06	2.50832e-06
Butyricicoccus	1.04915e-06	1.079e-06	1.47181e-06	2.72888e-06	1.30774e-06	1.96394e-06	1.99811e-06	2.70458e-06	9.48892e-07	5.38685e-07	2.39514e-06	1.58358e-06	2.12426e-06	1.83556e-06	2.15829e-06	1.14848e-06	1.49514e-06	8.00246e-07	1.5697e-06	9.3938e-07	1.65735e-06	6.91002e-07	5.18045e-07	1.9412e-07
Butyricimonas	9.5186e-07	1.32937e-06	5.9794e-07	1.342e-06	4.74701e-07	8.78219e-07	5.3828e-07	8.56054e-07	1.68361e-06	5.91868e-07	2.5122e-07	1.03056e-06	8.78302e-07	1.04853e-06	9.02285e-07	8.40496e-07	1.18291e-06	3.72722e-07	2.89746e-07	2.25004e-06	2.01779e-06	1.14113e-06	1.35173e-06	6.50117e-07
Butyrivibrio	1.5077e-06	3.26549e-06	9.96895e-07	1.48628e-06	4.87475e-07	1.77512e-06	5.44058e-07	1.80346e-06	2.25444e-06	2.89447e-06	2.2039e-06	2.9347e-06	1.45446e-06	1.64537e-06	2.27765e-06	2.12833e-06	3.81731e-06	3.3577e-06	2.31748e-06	3.45764e-06	2.55087e-06	2.94705e-06	2.22052e-06	1.63195e-06
Byssochlamys	0	0	1.65277e-07	0	1.74498e-07	0	0	9.61881e-08	0	0	7.04355e-08	9.05945e-08	6.54588e-08	8.47846e-07	3.75158e-07	6.81851e-08	0	3.14951e-07	0	0	1.14608e-07	1.50527e-06	0	0
Byssothecium	0	3.71201e-07	0	0	0	0	2.88793e-07	0	0	2.05099e-07	0	0	5.60327e-07	0	0	5.36457e-07	0	4.51343e-07	0	2.03434e-07	5.5502e-08	0	3.67891e-07	3.78969e-07
Byssovorax	3.91523e-06	5.52069e-06	3.89035e-06	5.07299e-06	4.51305e-06	3.41525e-06	2.90746e-06	5.21732e-06	3.65864e-06	5.7242e-06	5.28634e-06	3.95413e-06	5.65088e-06	2.27373e-06	5.17969e-06	6.40452e-06	2.00112e-06	2.79285e-06	3.44076e-06	2.48992e-06	4.09476e-06	2.23708e-06	4.50259e-06	3.34457e-06
Bythopirellula	2.19325e-05	2.45862e-05	2.33977e-05	2.17576e-05	2.76626e-05	2.27891e-05	2.31036e-05	2.19381e-05	1.99774e-05	1.69884e-05	2.278e-05	2.04896e-05	2.15784e-05	2.01468e-05	2.7518e-05	2.50734e-05	2.401e-05	1.43893e-05	5.9141e-05	1.69773e-05	1.55803e-05	9.46987e-06	1.30175e-05	1.53883e-05
Caballeronia	0.000240452	0.000244794	0.000275303	0.000237524	0.000249315	0.000238055	0.000271459	0.0002714	0.000232447	0.000196608	0.000221682	0.00020218	0.000220485	0.000196804	0.000214974	0.000209253	0.000193559	0.000190387	0.000174348	0.000181664	0.000212054	0.00018399	0.00022698	0.000228876
Cadophora	0	1.08055e-07	4.01008e-07	1.33508e-07	2.40191e-07	1.10257e-07	3.66937e-07	2.48502e-07	6.57254e-07	3.62284e-07	3.01464e-07	2.7536e-07	6.57195e-07	3.61729e-07	5.91832e-07	4.309e-07	1.33417e-07	0	1.32065e-06	3.95367e-07	5.72707e-07	9.49712e-07	6.35539e-07	0
Caedibacter	0	0	0	1.34127e-07	0	0	0	0	7.40301e-08	2.00314e-07	0	8.22337e-08	2.02041e-07	0	7.89828e-08	0	0	0	0	0	0	8.03335e-08	0	0
Caedimonas	1.20821e-06	6.57844e-07	4.45388e-07	4.71281e-07	1.66762e-06	1.59849e-06	1.95834e-06	1.01853e-06	6.06036e-07	2.96048e-07	6.18777e-07	1.50065e-06	1.01653e-06	1.63659e-07	7.7557e-07	4.85969e-07	6.46291e-07	1.4654e-07	8.91037e-07	5.68458e-07	2.45134e-07	6.50397e-07	2.1248e-07	2.53348e-07
Caenibacillus	1.96029e-06	1.65376e-06	1.34304e-06	8.29354e-07	1.53978e-06	2.64296e-06	3.48258e-06	2.12568e-06	1.56954e-06	1.58713e-06	1.55707e-06	2.67036e-06	1.13948e-06	1.94948e-06	2.6295e-06	2.75279e-06	8.56813e-07	3.69641e-07	2.27026e-07	2.10268e-07	3.68427e-07	3.13077e-07	8.21131e-07	1.42578e-06
Caenimonas	0.000540827	0.000477794	0.000411504	0.000391975	0.000390623	0.000417863	0.000349273	0.000378726	0.00293476	0.000454354	0.000449274	0.000402177	0.000375413	0.000319942	0.00037357	0.000334708	0.000455259	0.000584418	0.000486768	0.000471304	0.000438321	0.000348569	0.000381431	0.000405184
Caenispirillum	2.72569e-05	2.43718e-05	2.35894e-05	2.50743e-05	2.25326e-05	1.95726e-05	2.22651e-05	2.11826e-05	2.30526e-05	2.34916e-05	2.69643e-05	2.21554e-05	1.98935e-05	1.53384e-05	2.01607e-05	2.4825e-05	2.68989e-05	2.62543e-05	2.66457e-05	2.36624e-05	1.91399e-05	1.57952e-05	1.71132e-05	2.31967e-05
Caeruleovirus	2.85627e-07	1.54667e-07	0	1.0384e-07	8.89596e-08	2.01777e-07	1.01927e-07	1.47111e-07	0	0	0	0	0	4.43911e-08	0	0	0	0	0	0	0	0	0	0
Cafeteriavirus	4.32682e-07	7.80993e-08	1.47648e-07	0	6.73803e-08	0	0	1.48568e-07	3.04916e-07	1.54332e-07	2.23859e-07	6.90671e-08	1.38695e-07	6.72459e-08	3.55769e-07	5.77886e-07	0	0	0	1.03573e-07	4.36873e-07	2.48159e-07	8.56992e-08	4.75275e-07
Cairneyella	0	0	7.88791e-07	0	0	0	0	0	0	0	0	6.97578e-08	0	6.79184e-08	0	7.29581e-08	0	1.12836e-07	0	3.96887e-07	0	0	1.1389e-07	2.83676e-07
Calcarisporiella	0	0	0	0	0	0	0	0	0	0	0	0	0	0	0	0	0	0	0	0	0	3.09433e-07	0	0
Caldalkalibacillus	3.49828e-06	3.63194e-06	3.13593e-06	4.82405e-06	3.16679e-06	2.36794e-06	2.50696e-06	2.13404e-06	1.95021e-06	2.61457e-06	3.47726e-06	4.96443e-06	3.24985e-06	2.39673e-06	3.03291e-06	3.48694e-06	3.88422e-06	5.78064e-06	2.83542e-06	2.8198e-06	4.38594e-06	2.49911e-06	2.42966e-06	1.82241e-06
Caldanaerobacter	1.47834e-06	6.31013e-07	4.83388e-07	1.49204e-06	8.11385e-07	8.566e-07	1.76469e-06	2.53824e-06	6.35216e-07	6.12943e-07	2.73888e-06	1.72406e-06	1.56398e-06	1.46328e-06	6.82472e-07	8.69806e-07	2.49837e-06	1.16325e-07	1.64212e-06	3.87438e-07	1.53173e-06	6.10384e-07	2.21939e-07	1.98291e-06
Caldanaerobius	2.39678e-06	2.48871e-06	1.83263e-06	1.83201e-06	2.74453e-06	3.52808e-06	1.56473e-06	1.94397e-06	1.5033e-06	3.34748e-06	2.9116e-06	2.96836e-06	1.09118e-06	1.7841e-06	1.66629e-06	1.04555e-06	4.80312e-06	5.40479e-06	2.80208e-06	4.69419e-06	2.87342e-06	2.37462e-06	2.36977e-06	3.49168e-06
Caldanaerovirga	1.05756e-06	7.17094e-08	5.77671e-07	2.19585e-07	8.08625e-08	8.67186e-08	1.03965e-07	1.13677e-07	1.28562e-06	1.32053e-06	1.18187e-06	1.26198e-06	1.90507e-06	7.8475e-07	9.26734e-07	7.522e-07	4.74774e-07	1.28167e-06	4.13167e-07	1.0064e-06	4.8305e-07	9.89536e-07	9.6548e-07	8.09932e-07
Calderihabitans	3.09151e-06	3.62779e-06	4.11484e-06	4.07582e-06	4.21733e-06	5.06725e-06	3.08987e-06	2.88867e-06	1.94977e-06	2.39471e-06	2.40162e-06	4.97362e-06	2.73419e-06	2.50467e-06	4.45396e-06	3.76225e-06	4.99195e-06	2.78292e-06	3.66514e-06	2.55514e-06	3.42348e-06	2.93934e-06	1.59447e-06	3.75282e-06
Caldibacillus	2.91265e-07	1.67924e-06	5.53341e-07	5.20105e-07	1.35866e-06	7.79884e-07	1.22236e-06	9.89478e-07	9.33024e-07	1.14628e-06	7.8976e-07	9.50895e-07	1.39945e-06	1.38968e-06	8.02079e-07	2.6723e-06	2.57392e-06	7.21247e-07	2.21046e-06	4.45823e-07	2.44853e-07	4.42915e-07	2.28978e-06	6.4092e-07
Caldicellulosiruptor	1.98273e-06	2.30402e-06	1.56641e-06	2.85074e-06	2.98118e-07	1.63572e-06	1.37936e-06	1.88305e-06	6.46322e-07	1.58531e-06	1.78208e-06	1.33268e-06	2.00082e-06	1.30069e-06	9.24254e-07	1.12136e-06	2.21568e-06	2.59017e-06	1.1403e-06	1.71823e-06	2.0179e-06	1.71293e-06	1.40461e-06	1.15071e-06
Caldicoprobacter	2.13105e-06	2.02672e-06	1.60074e-06	2.7481e-06	1.72084e-06	2.01418e-06	3.57196e-06	2.51857e-06	2.29969e-06	2.71201e-06	1.68931e-06	1.73046e-06	3.7903e-06	2.38514e-06	2.69723e-06	1.49402e-06	1.921e-06	1.60061e-06	2.07567e-06	3.495e-06	9.86344e-07	2.24422e-06	2.96763e-06	1.80178e-06
Caldilinea	2.77591e-05	2.54422e-05	2.81041e-05	2.83268e-05	2.49825e-05	2.7769e-05	2.40262e-05	2.97603e-05	3.95763e-05	4.07341e-05	4.63014e-05	3.70082e-05	3.92051e-05	3.82625e-05	3.91642e-05	3.36438e-05	3.67739e-05	3.12152e-05	3.57684e-05	3.83273e-05	3.49444e-05	3.25115e-05	3.49473e-05	3.48601e-05
Caldimicrobium	2.91382e-06	2.61021e-06	2.32864e-06	2.73222e-06	4.46712e-06	2.32927e-06	2.42759e-06	2.67031e-06	1.6983e-06	3.05398e-06	2.12735e-06	2.29235e-06	3.61544e-06	2.65581e-06	3.59446e-06	2.93622e-06	9.42383e-07	4.87191e-07	3.60589e-06	9.42955e-07	2.1642e-06	2.39305e-06	1.44474e-06	1.60986e-06
Caldimonas	3.60656e-05	2.92276e-05	3.41618e-05	2.36298e-05	2.79313e-05	3.08701e-05	2.54388e-05	2.4508e-05	2.84632e-05	2.47698e-05	2.84032e-05	2.40657e-05	2.25196e-05	2.34832e-05	2.47512e-05	2.48013e-05	2.88165e-05	3.14487e-05	2.91544e-05	3.16901e-05	3.21304e-05	1.70355e-05	2.09577e-05	2.69847e-05
Caldisalinibacter	3.96494e-07	1.13892e-06	2.11842e-07	8.05896e-07	4.48808e-07	9.5735e-07	5.00151e-07	2.80429e-07	2.81675e-07	3.51231e-07	1.07666e-07	4.52972e-07	9.33905e-07	8.30037e-07	1.80972e-07	1.00632e-07	1.26486e-07	0	0	0	0	2.17005e-07	0	1.07053e-06
Caldisericum	4.8669e-07	6.17642e-06	3.16406e-07	1.11365e-06	7.80386e-07	1.90443e-07	3.34175e-07	4.57955e-07	5.29386e-07	1.14579e-06	3.74465e-07	7.74241e-07	6.81902e-06	3.38624e-06	3.02164e-06	3.39191e-06	1.54959e-06	7.79777e-07	1.46387e-06	4.40206e-07	1.02412e-06	1.58645e-06	1.03785e-06	8.4218e-07
Caldisphaera	5.53176e-07	1.88571e-07	2.57171e-07	0	0	0	1.97403e-07	0	1.41268e-07	0	0	0	1.92773e-07	3.11552e-07	1.569e-07	0	0	0	3.75846e-07	5.29662e-07	6.9903e-07	2.11511e-07	2.1913e-07	1.21526e-07
Calditerricola	3.24947e-06	2.75938e-06	2.00344e-06	3.86088e-06	2.2731e-06	3.2481e-06	2.13658e-06	2.19959e-06	3.47445e-06	2.57037e-06	2.45253e-06	2.39848e-06	3.21286e-06	2.03426e-06	3.21344e-06	2.70371e-06	1.92177e-06	2.54799e-06	2.00069e-06	7.76403e-07	2.02697e-06	3.15244e-06	2.28786e-06	2.66355e-06
Calditerrivibrio	2.12701e-06	2.91477e-06	1.89238e-06	1.01219e-06	7.05858e-07	7.63392e-07	3.67086e-07	1.17576e-06	1.21246e-06	1.28939e-06	8.11746e-07	1.31152e-06	1.16869e-06	1.00288e-06	1.73484e-06	2.19543e-06	2.73644e-06	9.16262e-07	1.33703e-06	2.19059e-06	1.93195e-06	9.7495e-07	1.4557e-06	2.59593e-06
Caldithrix	7.86557e-05	6.94901e-05	7.60129e-05	7.85424e-05	6.98844e-05	7.38208e-05	7.64263e-05	5.65604e-05	7.07686e-05	7.23272e-05	7.9225e-05	7.10296e-05	7.12902e-05	6.07646e-05	7.66607e-05	6.50492e-05	8.72263e-05	8.5642e-05	8.3004e-05	6.50706e-05	8.39057e-05	6.65398e-05	6.84961e-05	7.69852e-05
Caldivirga	1.02826e-07	7.72346e-08	2.98249e-07	0	0	1.55758e-07	0	5.3976e-08	2.68823e-07	4.79961e-07	1.0844e-07	2.64507e-07	2.01557e-07	1.95449e-07	2.50925e-07	8.09013e-07	4.94039e-07	0	6.64385e-07	1.23069e-07	2.29216e-07	0	1.24541e-07	1.24682e-07
Calidifontibacter	1.76597e-06	2.95016e-06	4.71422e-06	2.96203e-06	3.89984e-06	3.22236e-06	6.13517e-06	5.8723e-06	2.90685e-06	2.66545e-06	3.26918e-06	1.96991e-06	3.96225e-06	3.2468e-06	2.87789e-06	2.06253e-06	2.3016e-06	3.13529e-06	3.01255e-06	2.66187e-06	2.97303e-06	3.03472e-06	3.31293e-06	3.53345e-06
Calidithermus	5.80661e-05	6.08794e-05	6.33568e-05	6.68703e-05	6.10345e-05	6.10821e-05	5.52075e-05	5.50905e-05	5.39438e-05	5.25726e-05	5.96579e-05	6.0019e-05	5.41722e-05	5.01575e-05	5.94122e-05	6.01428e-05	5.09502e-05	5.29656e-05	4.36859e-05	5.22343e-05	5.52177e-05	4.37642e-05	5.80417e-05	5.51245e-05
Calocera	3.12739e-07	7.91564e-07	1.47574e-06	1.17501e-06	2.17612e-06	9.22724e-07	2.57997e-07	1.67544e-06	3.66891e-06	4.99308e-06	2.11334e-06	4.40654e-06	3.21905e-06	1.03446e-05	2.99459e-06	2.60708e-06	5.45256e-06	5.89195e-06	5.71929e-06	1.09276e-05	3.36825e-06	1.72115e-05	1.09525e-05	4.50046e-06
Calonectria	0	0	9.81084e-08	0	8.72488e-08	0	0	0	2.9612e-07	0	3.99199e-07	1.78866e-07	8.9796e-08	0	9.2135e-08	0	1.24864e-07	6.6374e-07	2.13875e-07	5.13625e-07	3.48348e-07	0	0	1.23084e-07
Caloramator	1.04922e-06	1.33854e-06	1.19561e-06	3.55957e-06	1.41347e-06	1.37283e-06	1.95377e-06	1.94486e-06	2.31586e-06	1.30912e-06	1.41571e-06	3.2646e-06	1.54265e-06	2.42118e-06	2.47866e-06	1.83708e-06	1.55595e-06	1.96935e-06	1.59299e-06	9.97167e-07	1.64469e-06	8.40379e-07	1.33792e-06	2.06537e-06
Caloranaerobacter	1.17127e-06	1.47682e-06	4.74185e-07	3.91179e-07	4.35966e-07	6.59414e-07	9.76476e-07	2.61555e-07	6.28139e-07	7.56187e-07	7.27638e-07	1.0701e-06	1.9784e-06	1.46791e-06	8.10844e-07	1.88874e-06	8.62129e-07	6.76247e-07	1.3947e-06	1.30867e-06	1.53475e-07	2.18684e-06	9.39859e-07	1.29425e-06
Calorimonas	7.26671e-07	4.54324e-07	8.19726e-07	8.70782e-07	5.25243e-07	5.565e-07	1.56027e-07	3.42505e-07	5.35028e-07	9.38965e-07	1.6567e-06	1.6211e-06	6.8367e-07	1.25784e-06	5.01711e-07	1.2405e-06	3.1615e-07	7.45044e-07	8.89049e-07	0	1.09932e-06	6.0448e-07	4.20986e-07	8.80108e-07
Calothrix	0.000174696	0.000172536	0.000185818	0.000181526	0.000186296	0.000176356	0.000194291	0.000168486	0.000165858	0.000158609	0.000178142	0.000182869	0.000167193	0.000149572	0.000166233	0.000175671	0.000165159	0.000154241	0.000144169	0.000149885	0.000174866	0.000146695	0.000153945	0.000168202
Camelimonas	6.33145e-06	7.52249e-06	9.24179e-06	7.94154e-06	7.85289e-06	5.22958e-06	6.67499e-06	6.49883e-06	5.50777e-06	4.64632e-06	5.49234e-06	6.93115e-06	7.66046e-06	5.8634e-06	6.38159e-06	5.38774e-06	7.17371e-06	8.50462e-06	6.66807e-06	6.78842e-06	6.10943e-06	5.38264e-06	3.79193e-06	7.8882e-06
Caminibacter	0	0	8.57038e-08	4.85115e-07	2.10215e-07	0	2.72003e-07	1.14545e-07	2.35763e-07	0	2.62905e-07	0	8.05068e-08	2.09796e-07	2.21874e-07	3.048e-07	0	0	0	0	1.02614e-07	9.71475e-08	3.0194e-07	0
Caminicella	1.26454e-06	1.64027e-06	7.09729e-07	2.23068e-06	9.96589e-07	2.15183e-06	8.49466e-07	9.29877e-07	1.89565e-06	2.70611e-06	1.00059e-06	1.6106e-06	1.61998e-06	1.17934e-06	1.70331e-06	1.88357e-06	3.98945e-07	7.8581e-07	3.60646e-07	8.45384e-07	1.14705e-06	4.74357e-07	1.75787e-06	2.60684e-06
Campylobacter	2.06153e-05	2.20261e-05	2.1253e-05	2.49161e-05	1.82177e-05	2.2028e-05	1.58717e-05	1.8273e-05	2.56608e-05	1.90927e-05	2.03241e-05	2.13857e-05	2.18671e-05	1.49381e-05	2.16181e-05	2.05709e-05	2.93436e-05	3.14923e-05	3.09324e-05	2.63636e-05	2.26305e-05	2.37134e-05	1.93427e-05	2.15271e-05
Camvirus	2.27716e-07	5.11342e-07	6.54056e-08	9.45685e-08	2.0041e-07	0	0	0	1.0473e-07	4.59667e-07	0	8.30449e-08	4.80808e-07	2.19035e-07	8.21371e-07	1.27997e-07	0	0	0	0	5.75051e-07	4.3972e-07	3.79632e-07	2.82723e-07
Candida	7.94562e-08	1.68307e-07	0	4.012e-08	1.54668e-07	6.18651e-07	2.14604e-07	5.51332e-07	8.20477e-07	1.18087e-07	2.94579e-07	1.00605e-06	9.7279e-08	1.26818e-06	6.18496e-07	4.52431e-07	1.41674e-06	1.07754e-06	6.50788e-07	1.66336e-06	0	3.04068e-06	1.8294e-06	4.38821e-07
Candidatus_Accumulibacter	0.000320769	0.000290406	0.000324861	0.000316332	0.000273566	0.000276663	0.000265709	0.000238363	0.000285083	0.000270562	0.000297903	0.000275654	0.000295947	0.000233855	0.000281369	0.000262968	0.000276731	0.000286698	0.000263894	0.000260351	0.000266495	0.000252204	0.000289145	0.000313625
Candidatus_Acetothermum	5.59829e-06	7.5335e-06	7.58074e-06	8.80353e-06	6.15983e-06	7.76959e-06	5.75245e-06	8.36328e-06	9.79896e-06	7.73958e-06	6.43228e-06	8.70369e-06	8.30793e-06	6.27611e-06	8.75385e-06	6.97424e-06	7.59404e-06	4.73871e-06	8.0912e-06	6.77716e-06	7.74197e-06	7.78309e-06	6.37552e-06	6.79953e-06
Candidatus_Acididesulfobacter	1.75332e-06	1.57412e-06	8.20834e-07	8.52087e-07	1.02744e-06	8.20326e-07	1.70951e-06	6.14001e-07	2.44203e-07	5.44019e-07	3.65961e-07	7.67906e-07	4.37671e-07	6.53855e-07	1.02665e-07	7.90089e-07	5.72375e-07	6.38164e-07	5.8471e-07	7.25333e-07	1.15523e-06	9.39932e-07	5.27781e-08	1.23011e-06
Candidatus_Acidulodesulfobacterium	1.17201e-06	3.71944e-07	1.65921e-06	1.31176e-06	2.76071e-07	5.59722e-07	2.90092e-07	9.74373e-08	7.63285e-07	1.26376e-06	8.84985e-07	8.99763e-07	1.28503e-06	2.22635e-06	7.13332e-07	2.72277e-07	6.46219e-07	5.80664e-07	2.37185e-07	2.92202e-08	2.35329e-07	8.10221e-07	0	7.05923e-08
Candidatus_Adiutrix	1.19728e-07	6.2672e-07	4.38602e-07	3.97079e-07	9.32248e-08	0	2.21482e-07	5.4411e-07	1.13222e-07	1.06764e-07	0	0	0	2.79117e-07	0	0	0	0	0	0	4.83552e-07	0	0	1.31514e-07
Candidatus_Aegiribacteria	1.63046e-06	2.88366e-06	1.61407e-06	1.35184e-06	3.05076e-06	1.47715e-06	2.0464e-06	1.85317e-06	4.0575e-06	1.57494e-06	1.32737e-06	1.19236e-06	2.47799e-06	1.31086e-06	2.49199e-06	1.39149e-06	1.96931e-06	2.05817e-06	1.32317e-06	1.20513e-06	3.14631e-06	2.04406e-06	1.02903e-06	2.10902e-06
Candidatus_Altiarchaeum	1.10635e-07	0	2.37398e-07	3.05529e-07	5.56169e-07	2.38566e-07	0	4.03644e-07	3.61645e-07	6.43399e-07	6.85604e-07	2.9875e-07	5.12118e-07	0	2.66273e-07	3.52169e-07	5.80221e-07	3.99094e-07	4.32557e-07	8.50221e-07	6.98438e-07	5.35056e-07	2.73769e-07	2.52801e-07
Candidatus_Amoebophilus	9.48331e-07	1.65516e-06	1.15899e-06	1.34917e-06	5.19497e-08	1.28224e-06	1.29008e-06	5.04444e-07	1.549e-06	8.68613e-07	8.38152e-07	1.80327e-06	1.09034e-06	8.81615e-07	1.38976e-06	1.18358e-06	1.16972e-06	9.34746e-07	7.74521e-07	7.97498e-07	7.94034e-07	3.7265e-07	8.32135e-07	3.98647e-07
Candidatus_Amulumruptor	0	0	0	0	0	0	0	0	0	6.73534e-07	0	3.87543e-07	0	1.10598e-07	0	0	0	6.96517e-07	1.39439e-07	2.74435e-07	1.08948e-07	1.03144e-07	2.83498e-07	3.6731e-07
Candidatus_Anammoximicrobium	4.01544e-05	5.94751e-05	4.3867e-05	5.85969e-05	4.62559e-05	5.01132e-05	4.83613e-05	4.96277e-05	3.99116e-05	4.9825e-05	4.32054e-05	4.80796e-05	5.28537e-05	4.30303e-05	4.87511e-05	5.1932e-05	4.18554e-05	3.61711e-05	5.809e-05	3.38934e-05	4.09094e-05	2.81003e-05	3.61731e-05	3.63824e-05
Candidatus_Aquiluna	4.49537e-07	1.12686e-07	2.40916e-07	5.14975e-07	3.54552e-07	5.33735e-07	9.38502e-07	1.28627e-06	3.18693e-07	5.01553e-07	1.10022e-07	3.37762e-07	5.00913e-07	9.69261e-07	6.38555e-07	8.06521e-07	4.60125e-07	6.30122e-07	9.19824e-07	7.05182e-07	5.20655e-07	5.11307e-07	1.06703e-06	6.65709e-07
Candidatus_Aramenus	0	1.59354e-07	8.2109e-07	1.6048e-07	6.87415e-08	0	1.57523e-07	7.57845e-08	1.70003e-07	0	1.52255e-07	0	1.98874e-07	0	0	1.4739e-07	0	0	0	0	0	0	0	0
Candidatus_Arcanobacter	8.01851e-08	2.22906e-07	8.87647e-08	1.11884e-07	0	1.08704e-07	0	1.05671e-07	0	1.43005e-07	3.07917e-07	0	2.80164e-07	0	2.39125e-07	0	0	4.84036e-07	0	1.56132e-07	5.18566e-07	9.09994e-07	3.09129e-07	1.12212e-06
Candidatus_Argoarchaeum	1.39495e-06	6.41234e-07	7.9677e-07	6.30457e-08	5.32409e-07	1.03523e-06	5.96954e-07	8.41868e-07	9.73667e-07	1.03859e-06	1.12199e-06	8.01061e-07	3.95602e-07	2.33043e-07	2.1386e-06	1.27174e-06	1.46083e-06	3.51059e-07	4.34406e-07	2.32329e-07	6.37676e-07	2.87726e-07	1.11446e-06	6.5524e-07
Candidatus_Arthromitus	9.50019e-08	0	0	2.59035e-07	0	0	1.69509e-07	0	9.28917e-08	0	3.69621e-07	5.33023e-07	7.61314e-08	0	0	0	0	0	0	0	0	2.35343e-07	0	6.76095e-07
Candidatus_Atelocyanobacterium	1.87961e-07	0	0	0	0	0	0	0	0	3.62751e-07	0	9.96539e-08	0	9.70262e-08	0	1.56899e-07	4.93135e-07	0	1.50594e-07	1.14571e-06	0	6.36627e-07	6.18258e-07	0
Candidatus_Babela	1.03658e-06	4.10308e-07	2.20906e-07	1.36534e-06	4.87763e-07	1.64212e-07	8.07257e-07	8.57281e-07	0	3.35677e-07	1.55083e-06	5.85223e-07	1.40003e-06	5.08066e-07	0	6.06063e-07	2.82302e-07	0	0	4.48321e-07	0	3.63247e-07	1.23652e-07	0
Candidatus_Berkiella	3.29121e-06	3.06777e-06	4.09015e-06	5.88282e-06	2.8502e-06	4.33919e-06	4.95966e-06	3.76041e-06	4.462e-06	8.46473e-06	3.63302e-06	5.89807e-06	2.00983e-06	3.96934e-06	3.90893e-06	6.52582e-06	3.2174e-06	9.24505e-07	3.92738e-06	2.98454e-06	4.6094e-06	3.34421e-06	3.95068e-06	4.59939e-06
Candidatus_Bipolaricaulis	7.84547e-06	7.25222e-06	5.83796e-06	6.93968e-06	6.67153e-06	5.59759e-06	7.18169e-06	6.24787e-06	6.89525e-06	5.21505e-06	6.17672e-06	8.00866e-06	6.03035e-06	6.12652e-06	7.80242e-06	7.86736e-06	4.30524e-06	3.67722e-06	5.95469e-06	2.73021e-06	4.69433e-06	4.61341e-06	4.27068e-06	6.04371e-06
Candidatus_Brocadia	0.000118922	0.000109906	0.000111883	0.000115295	0.00010402	0.000106881	0.000107461	9.67524e-05	9.79384e-05	9.63178e-05	0.000112194	0.000115524	0.000103473	8.95335e-05	0.00010777	0.000102925	0.000100392	9.09414e-05	0.000112107	9.77303e-05	0.00012433	0.000103037	9.46704e-05	0.000101878
Candidatus_Caldatribacterium	1.68426e-06	1.85796e-06	6.85012e-07	7.74603e-07	2.27175e-06	1.69059e-06	2.26716e-06	2.85091e-06	2.71668e-06	1.57267e-06	3.04662e-06	3.57079e-06	2.12296e-06	2.37757e-06	3.83666e-06	2.10971e-06	2.79053e-06	1.57043e-06	2.07169e-06	1.01387e-06	1.75194e-06	1.70158e-06	3.63555e-06	2.17001e-06
Candidatus_Caldiarchaeum	1.88834e-06	2.47234e-06	1.49669e-06	2.34304e-06	2.24233e-06	3.86063e-06	1.61803e-06	2.31484e-06	2.35358e-06	2.79481e-06	2.61222e-06	1.31187e-06	2.26664e-06	2.05303e-06	1.24763e-06	1.47847e-06	2.76296e-07	5.84327e-07	2.18698e-06	1.54616e-06	1.00531e-06	1.75122e-06	9.51398e-07	1.53062e-06
Candidatus_Carbobacillus	1.16352e-06	1.04145e-06	8.59138e-07	3.51174e-06	1.96484e-06	2.64925e-06	2.18354e-06	2.16449e-06	1.20079e-06	1.80068e-06	1.73446e-06	2.37678e-06	1.59547e-06	1.71245e-06	2.84347e-06	1.83762e-06	1.23933e-06	1.26343e-06	3.43151e-07	2.86149e-06	1.478e-06	1.6325e-06	1.93083e-06	2.31865e-06
Candidatus_Cardinium	2.79279e-07	4.31725e-07	2.76157e-07	3.43249e-07	2.94061e-07	7.97888e-07	2.27175e-07	6.96959e-07	8.55459e-08	0	0	3.60187e-07	0	6.65866e-08	1.89316e-07	1.16563e-07	9.54845e-08	0	1.25495e-07	0	9.80536e-08	7.20797e-07	6.12625e-07	9.4123e-08
Candidatus_Chazhemtobacterium	4.21546e-07	2.11049e-07	5.77234e-07	1.19337e-06	8.33376e-07	2.82388e-07	4.13155e-07	2.27463e-07	3.46808e-08	2.95579e-07	4.73328e-07	6.19781e-07	1.52583e-06	1.44539e-07	3.08026e-07	5.01739e-07	5.31706e-07	1.96236e-07	0	9.87004e-07	6.53667e-07	4.90457e-07	1.9506e-07	3.62964e-07
Candidatus_Chloroploca	4.17436e-05	4.53594e-05	5.06987e-05	5.18883e-05	4.85111e-05	5.43927e-05	4.73234e-05	4.15731e-05	4.77068e-05	4.69815e-05	5.61912e-05	5.91025e-05	6.14146e-05	5.61155e-05	5.67567e-05	5.51804e-05	4.3924e-05	5.12396e-05	5.37404e-05	4.66127e-05	5.00808e-05	4.46657e-05	5.11013e-05	4.97375e-05
Candidatus_Chrysopegis	2.93379e-06	1.84212e-06	2.36403e-06	3.3955e-06	3.53878e-06	3.18598e-06	3.66554e-06	3.28237e-06	2.55289e-06	3.48125e-06	2.91888e-06	2.82181e-06	2.7776e-06	3.97584e-06	4.16126e-06	3.43697e-06	2.98082e-06	2.57357e-06	3.64612e-06	2.13281e-06	3.87238e-06	2.94518e-06	2.44019e-06	3.05806e-06
Candidatus_Cloacimonas	5.12908e-06	3.46825e-06	5.47623e-06	2.13331e-06	3.69163e-06	4.70156e-06	6.70012e-06	4.27161e-06	4.89784e-06	3.62091e-06	3.5339e-06	2.92666e-06	3.36896e-06	3.15223e-06	3.71191e-06	3.0159e-06	7.07497e-07	1.99776e-06	4.01043e-06	3.47448e-06	2.34673e-06	2.51801e-06	2.11648e-06	1.64831e-06
Candidatus_Competibacter	3.26793e-05	2.79132e-05	3.99256e-05	3.14466e-05	2.96729e-05	2.82833e-05	2.55417e-05	2.26366e-05	3.08602e-05	2.94882e-05	3.44957e-05	2.87335e-05	2.61461e-05	2.56331e-05	2.9298e-05	2.55619e-05	3.10166e-05	3.42588e-05	3.13437e-05	2.3287e-05	3.14346e-05	2.26138e-05	2.67022e-05	2.80384e-05
Candidatus_Contendobacter	4.34067e-05	5.17936e-05	4.43664e-05	5.249e-05	3.97282e-05	3.84288e-05	4.06121e-05	4.21664e-05	4.16657e-05	4.44493e-05	4.80249e-05	4.85822e-05	4.18119e-05	3.97478e-05	4.7305e-05	4.20234e-05	3.96874e-05	3.95877e-05	3.70692e-05	4.00622e-05	3.72093e-05	3.53217e-05	4.39414e-05	4.74697e-05
Candidatus_Cryosericum	5.93673e-06	6.19354e-06	3.47931e-06	4.44078e-06	5.57679e-06	5.44693e-06	5.23499e-06	4.70728e-06	5.73509e-06	5.37802e-06	6.67393e-06	5.90105e-06	6.26914e-06	5.77869e-06	5.88556e-06	3.99905e-06	2.75201e-06	3.37915e-06	3.43118e-06	3.435e-06	5.55756e-06	3.69644e-06	4.23826e-06	4.56231e-06
Candidatus_Cyclonatronum	6.61895e-07	5.14437e-07	1.88057e-06	7.57925e-07	1.03784e-06	1.81599e-07	2.58989e-07	5.74747e-07	5.90757e-07	8.47447e-07	1.36444e-06	1.06917e-06	1.35683e-06	2.26965e-06	1.02164e-06	2.86286e-07	1.27173e-06	1.69956e-06	1.34068e-06	2.66837e-06	4.10512e-07	2.21983e-06	1.33408e-06	2.21985e-07
Candidatus_Dactylopiibacterium	5.5007e-06	6.96374e-06	4.94846e-06	6.92642e-06	5.57891e-06	8.32497e-06	7.51154e-06	6.4398e-06	9.61412e-06	4.80936e-06	6.81527e-06	6.71392e-06	7.54975e-06	5.39073e-06	5.20004e-06	5.75551e-06	6.09801e-06	5.42184e-06	9.22353e-06	8.21821e-06	7.3979e-06	6.35611e-06	6.50924e-06	5.73554e-06
Candidatus_Desulfofervidus	6.29624e-06	6.73321e-06	8.78749e-06	1.06505e-05	6.75705e-06	6.88567e-06	7.03482e-06	7.05631e-06	6.78518e-06	7.55052e-06	6.8631e-06	7.36347e-06	7.39248e-06	5.01724e-06	6.68576e-06	9.82856e-06	7.36976e-06	8.30616e-06	8.49248e-06	5.35452e-06	7.92532e-06	9.13198e-06	4.23287e-06	7.47673e-06
Candidatus_Desulforudis	5.33424e-06	9.17277e-06	9.92908e-06	6.67626e-06	6.50453e-06	5.87428e-06	7.40863e-06	7.18415e-06	8.22548e-06	8.09339e-06	8.70737e-06	7.64852e-06	5.34611e-06	7.91881e-06	7.42631e-06	8.6916e-06	6.548e-06	1.02127e-05	1.02878e-05	6.04376e-06	5.954e-06	5.5785e-06	4.63263e-06	5.68906e-06
Candidatus_Dichloromethanomonas	5.98642e-07	0	2.0428e-07	4.02215e-07	3.5722e-07	1.55918e-07	1.06814e-07	2.27354e-07	0	4.40782e-07	9.28072e-07	9.55586e-08	0	6.86044e-08	5.7572e-07	9.99426e-08	8.11618e-07	1.56716e-07	0	0	4.58432e-07	1.16037e-07	4.35495e-07	2.63029e-07
Candidatus_Dormibacter	3.19192e-05	3.01909e-05	2.3205e-05	3.1046e-05	5.86441e-05	5.86666e-05	5.76762e-05	5.83227e-05	6.27921e-05	5.30924e-05	4.85417e-05	4.65818e-05	4.75948e-05	3.98484e-05	4.91929e-05	4.43393e-05	5.49726e-05	3.57478e-05	3.86705e-05	4.11195e-05	3.07463e-05	2.99821e-05	2.96039e-05	3.28204e-05
Candidatus_Electronema	2.42546e-06	3.99912e-06	3.58502e-06	2.6487e-06	3.62428e-06	2.08776e-06	1.76268e-06	4.31048e-06	3.58995e-06	3.00975e-06	6.27343e-06	3.1348e-06	2.44876e-06	1.4753e-06	2.1867e-06	3.28712e-06	3.49714e-06	4.79648e-06	2.39008e-06	2.33004e-06	2.54719e-06	2.68685e-06	3.28509e-06	3.64685e-06
Candidatus_Electrothrix	3.0888e-06	4.88851e-06	1.97631e-06	2.85801e-06	1.67436e-06	1.88095e-06	5.0307e-06	3.11466e-06	3.11605e-06	3.21902e-06	4.66245e-06	2.88781e-06	3.5481e-06	2.20642e-06	3.51233e-06	5.98374e-06	3.12697e-06	3.85116e-06	4.1439e-06	2.04597e-06	4.28048e-06	4.98798e-06	3.52574e-06	3.82158e-06
Candidatus_Endobugula	1.04509e-06	3.10936e-06	1.21229e-06	8.07322e-07	7.06028e-07	7.57055e-07	9.81619e-07	6.46891e-07	1.02709e-06	1.07371e-06	1.13402e-06	5.71207e-07	1.5079e-06	1.11079e-06	1.86454e-06	2.113e-06	1.48455e-06	2.0994e-06	9.38324e-07	1.62231e-06	3.22471e-07	1.29587e-06	2.07138e-07	9.18926e-07
Candidatus_Endolissoclinum	3.49287e-06	2.88266e-06	3.61542e-06	5.46113e-06	4.15725e-06	2.63623e-06	4.15041e-06	5.11476e-06	5.13346e-06	3.38264e-06	6.20154e-06	3.91163e-06	4.55316e-06	4.16614e-06	3.28848e-06	3.23811e-06	5.86031e-06	4.71571e-06	5.32292e-06	4.31635e-06	3.06518e-06	3.13236e-06	2.88046e-06	2.7627e-06
Candidatus_Endoriftia	4.74792e-07	4.85044e-07	2.32564e-07	5.08425e-07	3.18274e-07	0	1.82402e-07	6.94319e-07	9.87068e-08	4.70768e-07	9.21321e-07	8.03263e-07	7.49526e-07	0	9.69867e-07	1.15381e-06	5.90213e-07	0	2.65369e-07	5.6959e-07	5.07566e-07	2.48052e-07	1.37037e-06	5.47872e-07
Candidatus_Entotheonella	0.000238953	0.000207139	0.000228218	0.000230223	0.00019487	0.000170404	0.000184435	0.000167416	0.000195898	0.000188134	0.000224368	0.000212341	0.000206623	0.000173023	0.00021473	0.0001978	0.000229338	0.00021699	0.000201715	0.000211101	0.000260893	0.0001941	0.000201439	0.00019587
Candidatus_Eremiobacter	1.03151e-05	1.38774e-05	1.19365e-05	1.3632e-05	1.42278e-05	1.65113e-05	1.46081e-05	1.31263e-05	7.5678e-06	9.79964e-06	1.11997e-05	9.82472e-06	1.27126e-05	8.04783e-06	1.39947e-05	1.0152e-05	9.36647e-06	5.86236e-06	6.51533e-06	5.94086e-06	8.3874e-06	6.26183e-06	8.00713e-06	1.01143e-05
Candidatus_Fermentibacter	8.50793e-07	6.75292e-07	2.52864e-06	1.25519e-06	4.49726e-07	5.63879e-07	3.52022e-07	6.97304e-07	1.16359e-06	3.27172e-06	6.5566e-07	1.58868e-06	1.06753e-06	1.11749e-06	1.11691e-06	9.532e-07	2.53097e-06	5.34749e-07	2.42539e-06	1.01058e-06	2.54588e-07	1.81622e-06	7.60533e-07	9.58638e-07
Candidatus_Finniella	2.24981e-06	1.74887e-06	1.76448e-06	2.29907e-06	1.50684e-06	1.6443e-06	1.46275e-06	1.25302e-06	2.3708e-06	2.16882e-06	2.34569e-06	2.5585e-06	2.63328e-06	3.07326e-06	2.84876e-06	3.10311e-06	1.91953e-06	1.35507e-06	1.34789e-06	5.31832e-07	9.79473e-07	1.08071e-06	6.94384e-07	7.40329e-07
Candidatus_Fonsibacter	3.72954e-07	7.86902e-07	1.42377e-06	1.7269e-07	3.99453e-07	5.32132e-07	0	4.00544e-07	5.65213e-07	1.62889e-06	8.19196e-08	8.37176e-07	5.86704e-07	7.11125e-07	3.98886e-07	5.64585e-07	2.61482e-07	7.62755e-07	9.04588e-07	4.54819e-07	0	4.91559e-07	4.57049e-07	1.1305e-06
Candidatus_Frackibacter	3.00163e-07	2.87279e-07	1.18824e-06	7.53499e-07	9.14788e-07	6.80082e-07	1.16379e-07	2.67818e-07	1.01057e-06	8.32843e-07	3.5101e-07	6.70875e-07	9.20257e-07	5.25235e-07	1.19875e-06	3.35491e-07	6.41107e-07	9.55342e-07	7.82448e-07	1.32704e-06	1.1272e-06	8.98286e-07	4.73497e-07	1.0956e-06
Candidatus_Fukatsuia	3.21742e-07	5.32975e-07	6.70002e-07	0	3.4637e-07	0	6.42449e-07	5.10287e-07	8.74901e-08	1.77131e-07	0	2.37811e-07	0	0	0	0	0	0	0	0	0	0	0	0
Candidatus_Galacturonibacter	8.74018e-08	1.57761e-07	0	1.58875e-07	6.70956e-07	5.17389e-07	0	2.2508e-07	0	0	0	5.49019e-07	2.59411e-07	0	1.43731e-07	0	0	0	0	0	1.08948e-07	2.06289e-07	1.06859e-07	0
Candidatus_Glomeribacter	2.09475e-06	6.97907e-06	4.52419e-06	4.14433e-06	5.44498e-06	5.43418e-06	4.84387e-06	5.82485e-06	6.96914e-06	8.56103e-06	4.0611e-06	5.36723e-06	3.16199e-06	9.99889e-06	3.82083e-06	5.3869e-06	5.72981e-06	4.5826e-06	5.9901e-06	1.05367e-05	3.37166e-06	1.14656e-05	8.59256e-06	5.10316e-06
Candidatus_Hadarchaeum	9.93202e-08	3.58547e-07	1.74883e-07	0	0	0	0	1.64377e-07	0	1.30634e-07	0	2.37811e-07	0	1.00951e-07	8.16652e-08	7.46162e-10	0	5.58186e-07	7.90294e-07	0	5.51552e-07	9.20915e-07	2.1639e-07	0
Candidatus_Hakubanella	8.32696e-06	9.68212e-06	8.13551e-06	9.95891e-06	7.94426e-06	1.10968e-05	7.48719e-06	7.45486e-06	8.06135e-06	9.02637e-06	1.22948e-05	1.10122e-05	9.32711e-06	8.23591e-06	8.19596e-06	1.11937e-05	8.73908e-06	1.07936e-05	8.68985e-06	8.92178e-06	6.88235e-06	8.31411e-06	5.74019e-06	5.39632e-06
Candidatus_Halobonum	1.0973e-06	3.02072e-07	4.80145e-07	7.17299e-07	1.17171e-06	5.29637e-07	7.45207e-07	1.68047e-06	2.61305e-06	2.07057e-06	2.93452e-06	1.52166e-06	2.12149e-06	1.65006e-06	2.1351e-06	2.25197e-06	2.62719e-06	1.85137e-06	1.54054e-06	2.39066e-06	3.46715e-06	2.0809e-06	2.19131e-06	3.62855e-06
Candidatus_Hamiltonella	0	0	0	2.2066e-07	9.45196e-08	0	0	7.66134e-07	0	0	0	0	0	4.71655e-07	0	0	0	0	0	0	0	0	0	0
Candidatus_Hepatobacter	0	0	0	0	0	0	0	0	5.20211e-07	0	0	0	0	0	0	0	0	0	0	0	0	0	0	0
Candidatus_Hepatoplasma	0	7.24411e-07	0	0	0	0	0	0	0	0	0	0	0	0	0	0	0	0	0	0	0	0	0	0
Candidatus_Hodgkinia	0	0	3.98396e-07	3.2161e-08	9.32248e-08	0	0	0	9.36064e-08	3.2885e-08	1.48899e-07	9.55117e-07	1.68156e-07	9.07005e-07	0	0	6.21665e-07	1.23656e-06	0	0	2.27837e-06	3.8859e-08	0	1.30324e-07
Candidatus_Huberarchaeum	0	2.60045e-07	3.27747e-07	0	1.49569e-07	0	0	0	8.46058e-08	0	4.94255e-07	1.99308e-07	7.6968e-08	1.94052e-07	7.89729e-08	0	1.39135e-07	9.67163e-07	0	0	0	2.26464e-07	1.23652e-07	0
Candidatus_Hydrogenedens	9.44946e-06	6.91152e-06	8.72688e-06	8.38286e-06	9.0205e-06	5.76328e-06	9.08815e-06	7.25023e-06	9.93567e-06	8.44552e-06	9.40781e-06	9.75138e-06	7.9738e-06	6.89881e-06	8.73628e-06	8.414e-06	1.15985e-05	9.54182e-06	8.07373e-06	5.14253e-06	7.64058e-06	5.80994e-06	5.63455e-06	8.37899e-06
Candidatus_Ishikawaella	1.3045e-07	1.17732e-07	0	3.55691e-07	0	0	0	0	0	0	0	0	0	0	0	0	0	0	0	1.56132e-07	0	1.24697e-07	0	0
Candidatus_Izimaplasma	0	0	0	3.02619e-07	0	0	5.73339e-07	0	2.92372e-07	0	0	0	0	0	0	0	0	0	0	0	0	3.21334e-07	1.57688e-07	3.69252e-07
Candidatus_Jettenia	3.7798e-05	3.57026e-05	3.41687e-05	3.79385e-05	3.28642e-05	3.21755e-05	3.30053e-05	3.11356e-05	2.82262e-05	2.62709e-05	3.23253e-05	3.10269e-05	3.39545e-05	2.81311e-05	3.45309e-05	3.15361e-05	2.83852e-05	2.17518e-05	2.41533e-05	2.17162e-05	3.26247e-05	2.81464e-05	2.98163e-05	3.09197e-05
Candidatus_Jidaibacter	2.44218e-07	1.43841e-07	0	6.14662e-07	1.12278e-06	6.10104e-07	8.84372e-07	6.21781e-07	9.60875e-07	3.15347e-07	4.84619e-07	1.08673e-06	3.95632e-07	7.97023e-07	5.85849e-07	6.17073e-07	2.2706e-06	7.88474e-07	2.73414e-07	3.37694e-07	2.05945e-07	3.40723e-07	3.60714e-07	8.68907e-07
Candidatus_Kentron	4.14036e-05	4.71463e-05	5.21281e-05	5.55001e-05	5.03125e-05	4.48204e-05	4.85537e-05	4.53332e-05	5.56546e-05	4.91598e-05	5.47944e-05	5.5105e-05	4.24168e-05	4.11474e-05	5.18876e-05	4.99285e-05	5.69435e-05	4.72557e-05	4.9566e-05	4.85926e-05	4.88119e-05	4.64578e-05	4.11682e-05	5.46747e-05
Candidatus_Kinetoplastibacterium	0	9.61955e-08	2.93085e-07	9.68751e-08	6.90616e-07	3.91382e-07	1.96355e-07	3.00107e-07	5.99932e-07	6.6532e-07	1.89788e-07	0	2.87979e-07	4.14136e-07	3.73326e-07	1.89502e-07	7.05252e-07	1.4654e-07	2.93365e-07	3.99185e-07	4.58432e-07	0	4.49642e-07	0
Candidatus_Korarchaeum	1.45065e-07	3.58461e-07	0	8.31752e-07	1.33324e-06	7.42111e-08	9.92495e-08	1.4156e-07	2.99885e-07	3.23392e-08	5.12795e-07	1.19664e-07	6.25964e-07	0	6.91013e-08	4.61499e-07	1.46697e-07	7.29047e-08	0	3.70682e-07	5.47551e-07	3.15054e-07	8.96955e-08	1.651e-07
Candidatus_Koribacter	0.000716627	0.0012962	0.000785797	0.00082786	0.0012336	0.00119065	0.00120074	0.00116611	0.000266742	0.000275732	0.000211687	0.000260785	0.000414778	0.000399672	0.000383452	0.000444931	0.000102088	8.4441e-05	8.5519e-05	9.64911e-05	0.000132234	0.000106318	0.00017217	0.000147169
Candidatus_Kryptobacter	4.70499e-06	4.68954e-06	3.46879e-06	3.02381e-06	5.30453e-06	3.45957e-06	2.97666e-06	3.89127e-06	3.68399e-06	2.61061e-06	4.26003e-06	4.19104e-06	2.90964e-06	2.5011e-06	3.80624e-06	3.42467e-06	3.47548e-06	4.75637e-06	5.86349e-06	2.71082e-06	3.07375e-06	5.37674e-06	3.19144e-06	4.15305e-06
Candidatus_Kryptonium	6.53401e-06	6.5077e-06	7.3358e-06	5.88045e-06	5.6158e-06	3.89946e-06	5.90148e-06	3.32955e-06	5.50231e-06	4.43096e-06	5.44735e-06	5.36337e-06	5.43759e-06	3.71221e-06	5.03274e-06	3.93876e-06	3.64469e-06	5.12962e-06	6.71696e-06	2.85367e-06	3.90452e-06	3.44154e-06	5.16819e-06	4.21122e-06
Candidatus_Kuenenia	1.10207e-05	1.24464e-05	1.14209e-05	1.1737e-05	8.58507e-06	7.43361e-06	9.9689e-06	8.2861e-06	1.36825e-05	1.15275e-05	1.05123e-05	1.1139e-05	1.29674e-05	1.18987e-05	1.27107e-05	1.14195e-05	9.87174e-06	1.00841e-05	8.52939e-06	9.2023e-06	8.25816e-06	8.93348e-06	1.06604e-05	9.67104e-06
Candidatus_Lumbricidophila	2.57064e-07	2.27539e-07	0	0	1.33439e-07	1.51333e-07	7.49751e-08	5.6076e-07	1.01304e-07	0	1.12487e-07	7.0426e-07	5.09725e-07	5.9928e-07	4.41421e-07	1.3905e-07	4.18879e-07	8.29674e-07	1.68575e-07	2.75285e-07	8.12813e-07	0	1.1389e-07	4.29875e-07
Candidatus_Macondimonas	4.75743e-06	6.56553e-06	4.03891e-06	3.65146e-06	3.0465e-06	3.94158e-06	3.33305e-06	3.06482e-06	3.15725e-06	3.0069e-06	5.8156e-06	3.73432e-06	7.83838e-06	8.37133e-06	3.8379e-06	5.63591e-06	2.40887e-06	1.67123e-06	2.39662e-06	1.8493e-06	2.49919e-06	2.00374e-06	2.09789e-06	1.20142e-06
Candidatus_Magnetaquicoccus	3.88351e-06	2.38057e-06	3.31517e-06	4.75809e-06	3.22163e-06	2.50079e-06	1.99127e-06	2.29378e-06	2.33759e-06	1.84732e-06	3.7021e-06	3.14386e-06	1.40315e-06	2.82072e-06	1.71412e-06	1.34813e-06	2.30299e-06	1.03621e-06	2.02964e-06	2.31722e-06	1.34246e-06	1.45457e-06	1.69771e-06	9.96533e-07
Candidatus_Magnetobacterium	2.16618e-05	1.92249e-05	2.32229e-05	1.90207e-05	1.99593e-05	2.04275e-05	1.84145e-05	1.51506e-05	1.77086e-05	2.34898e-05	2.04159e-05	2.28977e-05	1.96141e-05	1.50624e-05	2.0168e-05	1.72244e-05	1.73877e-05	1.69126e-05	1.61177e-05	1.66476e-05	2.21086e-05	2.35017e-05	2.07118e-05	2.20267e-05
Candidatus_Magnetoglobus	3.15891e-06	2.78855e-06	3.6147e-06	4.94337e-06	2.49126e-06	2.89613e-06	4.69026e-06	2.70704e-06	3.72384e-06	5.29143e-06	3.64164e-06	3.05775e-06	4.21636e-06	4.10685e-06	3.8219e-06	3.8897e-06	3.90474e-06	3.23884e-06	7.50079e-06	3.75674e-06	3.06308e-06	3.60477e-06	3.98415e-06	8.3737e-06
Candidatus_Magnetomorum	5.51848e-06	6.22762e-06	4.99119e-06	6.86782e-06	6.81205e-06	6.70268e-06	4.8412e-06	5.16526e-06	6.87947e-06	5.55739e-06	7.16932e-06	4.44845e-06	6.32341e-06	5.22865e-06	7.09197e-06	5.1428e-06	3.51164e-06	8.7256e-06	4.18234e-06	3.04332e-06	4.32137e-06	3.13661e-06	4.55721e-06	4.60339e-06
Candidatus_Magnetoovum	2.83551e-06	3.6122e-06	3.8544e-06	3.77407e-06	4.10977e-06	3.08699e-06	3.23069e-06	2.3785e-06	1.29736e-06	2.14823e-06	2.44507e-06	1.7066e-06	2.71326e-06	2.44308e-06	1.98018e-06	1.54481e-06	3.38589e-06	2.58359e-06	1.8682e-06	2.65858e-06	1.95798e-06	1.14901e-06	2.63641e-06	2.41765e-06
Candidatus_Mancarchaeum	1.40971e-07	1.27226e-07	0	6.40625e-08	1.64647e-07	6.22416e-07	1.25765e-07	6.05054e-08	2.60357e-07	0	0	3.36994e-08	6.76724e-08	1.20394e-07	1.04153e-07	0	0	1.2461e-07	0	0	1.94871e-07	4.27421e-07	0	6.71111e-08
Candidatus_Manganitrophus	0.000102318	8.56918e-05	8.49726e-05	9.06656e-05	7.75887e-05	8.23137e-05	8.51591e-05	7.04918e-05	9.8586e-05	8.76661e-05	8.93207e-05	0.000168501	0.000119248	9.23225e-05	0.000122092	0.000126198	0.000165808	0.000166349	0.000408732	0.000168136	0.000107105	9.24214e-05	8.27299e-05	0.0001104
Candidatus_Marithrix	3.60376e-06	3.17137e-06	3.29664e-06	3.38634e-06	3.13513e-06	2.40086e-06	2.52226e-06	2.72495e-06	5.19783e-06	2.61695e-06	5.42878e-06	5.20022e-06	3.91431e-06	2.43286e-06	3.89548e-06	3.35412e-06	4.61393e-06	5.54634e-06	4.7097e-06	4.00126e-06	4.34754e-06	3.0783e-06	3.48473e-06	4.41945e-06
Candidatus_Mcinerneyibacterium	0	0	2.69502e-07	0	3.88881e-07	0	0	0	2.43724e-07	4.19019e-07	2.21665e-07	8.40455e-08	7.53128e-08	0	7.04562e-08	7.15276e-08	0	0	0	0	0	0	0	0
Candidatus_Methanodesulfokores	3.20203e-07	3.36768e-07	9.57963e-08	4.49733e-07	1.46521e-07	3.14567e-07	5.14213e-07	2.26131e-07	1.78235e-07	5.18186e-07	0	2.91658e-07	9.33879e-08	3.93082e-07	1.50759e-07	1.27531e-07	0	3.69953e-07	0	8.57445e-08	0	2.08896e-07	0	0
Candidatus_Methanofastidiosum	2.68621e-06	3.08293e-06	3.13444e-06	2.54428e-06	2.94293e-06	2.9744e-06	2.00688e-06	1.99764e-06	3.69373e-06	2.91725e-06	3.61924e-06	3.29717e-06	1.66804e-06	3.32496e-06	3.95535e-06	2.94124e-06	1.16187e-06	2.60818e-06	1.93358e-06	3.01006e-06	3.57935e-06	2.37855e-06	2.34943e-06	1.12114e-06
Candidatus_Methanofishera	1.87961e-07	3.53195e-07	5.79927e-07	4.27084e-07	1.91702e-07	1.65978e-07	0	0	1.02787e-06	0	6.72911e-08	5.23593e-07	0	0	0	0	4.49405e-07	5.38337e-07	2.1946e-06	1.33311e-06	4.45403e-06	7.45954e-08	1.93206e-08	7.32899e-08
Candidatus_Methanohalarchaeum	0	0	0	0	0	0	0	0	0	0	0	0	0	4.04276e-07	0	0	1.09432e-07	2.77806e-07	9.23434e-08	6.63869e-07	0	1.48605e-07	0	2.66682e-07
Candidatus_Methanoliparum	0	0	0	0	0	0	0	0	1.01304e-07	0	0	0	0	4.46831e-07	0	0	0	0	0	0	0	0	0	1.26323e-07
Candidatus_Methanolliviera	0	9.37377e-07	2.72789e-07	9.68751e-08	8.29928e-08	6.5885e-07	3.32816e-07	0	0	0	0	0	0	0	0	8.89733e-08	0	3.52612e-07	8.82386e-08	2.45176e-07	0	0	0	0
Candidatus_Methanomethylicus	4.0652e-07	4.13569e-07	1.03559e-07	7.60696e-07	8.95449e-08	0	3.84924e-07	1.37875e-07	2.14394e-07	1.06764e-07	3.27678e-09	4.04393e-07	3.39339e-07	0	3.38137e-07	1.01476e-06	4.10301e-07	0	1.31332e-07	8.16471e-07	1.02614e-07	9.71475e-08	7.04527e-07	0
Candidatus_Methanomethylophilus	0	0	0	4.3647e-07	4.10854e-07	0	0	0	0	6.23103e-07	0	0	1.87979e-07	0	0	0	0	0	0	0	0	0	0	0
Candidatus_Methanoperedens	5.13512e-05	4.04093e-05	4.58607e-05	4.97288e-05	4.61828e-05	4.51426e-05	4.62792e-05	3.88322e-05	3.94205e-05	4.74853e-05	5.7333e-05	4.88225e-05	3.86262e-05	3.98561e-05	4.10618e-05	4.59087e-05	5.22304e-05	5.13592e-05	5.43059e-05	4.57468e-05	6.16781e-05	4.36354e-05	4.96713e-05	5.20962e-05
Candidatus_Methanoplasma	0	0	0	3.40447e-07	5.81659e-08	0	6.66445e-08	0	0	0	6.44154e-08	2.38488e-07	0	0	0	0	0	0	0	0	0	0	0	0
Candidatus_Methanosuratus	3.59185e-07	6.07828e-07	3.80321e-07	1.05989e-06	5.61681e-07	1.11654e-06	3.84543e-07	3.78618e-07	5.20077e-07	6.17983e-07	1.27664e-06	9.95504e-07	5.87671e-07	3.64348e-07	1.85528e-07	1.31346e-06	1.99493e-06	5.64146e-07	1.14489e-06	8.81015e-07	9.60339e-07	1.45688e-06	7.32005e-07	9.75801e-07
Candidatus_Methylomirabilis	9.96503e-05	7.76006e-05	9.88907e-05	9.79478e-05	7.63177e-05	8.23978e-05	8.54298e-05	7.17141e-05	9.90115e-05	9.44994e-05	0.000105908	0.000105429	9.10278e-05	8.23243e-05	9.86322e-05	9.41064e-05	9.49552e-05	9.24183e-05	0.000105503	8.60447e-05	0.000110192	8.93976e-05	9.46422e-05	0.000104043
Candidatus_Methylopumilus	5.52303e-06	1.08528e-05	8.63944e-06	8.71487e-06	4.65048e-06	5.39366e-06	4.17997e-06	4.03988e-06	8.19771e-06	8.42889e-06	9.94837e-06	8.70028e-06	1.03327e-05	9.75615e-06	7.55572e-06	8.602e-06	4.15823e-06	6.57142e-06	3.89616e-06	5.38277e-06	3.70263e-06	4.15572e-06	3.12174e-06	4.05147e-06
Candidatus_Methylospira	8.00482e-06	7.39727e-06	8.65755e-06	7.93825e-06	7.99354e-06	5.83824e-06	7.64481e-06	7.33913e-06	6.37025e-06	4.95886e-06	6.69532e-06	6.2344e-06	7.28092e-06	6.48451e-06	6.09169e-06	7.51186e-06	5.53402e-06	3.38493e-06	3.85945e-06	6.07947e-06	5.59206e-06	3.79261e-06	5.92604e-06	7.09882e-06
Candidatus_Methyloumidiphilus	1.67421e-05	2.01764e-05	1.68109e-05	2.38886e-05	1.9594e-05	2.03418e-05	1.86822e-05	2.09952e-05	1.92108e-05	1.85083e-05	1.8411e-05	1.86005e-05	1.5582e-05	1.4053e-05	1.25282e-05	1.84699e-05	1.97776e-05	2.30733e-05	2.29028e-05	1.77277e-05	2.2081e-05	1.44815e-05	1.52214e-05	1.74043e-05
Candidatus_Micrarchaeum	4.88278e-08	7.34673e-07	2.2874e-07	2.07321e-07	3.0472e-07	0	0	1.05671e-07	4.95741e-07	3.47935e-07	2.73309e-07	3.54226e-07	6.17273e-07	4.55469e-07	4.00502e-07	3.01323e-07	7.81232e-07	7.45522e-07	8.40011e-07	0	2.88902e-07	1.50254e-06	1.21511e-06	1.01905e-06
Candidatus_Micropelagos	4.60258e-07	4.24488e-07	4.6121e-07	3.19021e-07	1.36333e-06	2.11668e-07	7.16543e-07	1.01694e-06	2.29825e-07	6.05263e-07	2.06694e-07	1.39135e-06	1.06663e-06	4.30552e-07	1.07262e-07	1.29479e-06	9.78012e-07	1.62587e-06	5.64727e-07	1.32977e-06	3.64591e-07	1.24697e-07	2.58377e-07	1.26634e-06
Candidatus_Microthrix	2.24555e-05	1.46452e-05	1.56321e-05	1.85486e-05	3.05894e-05	2.79589e-05	2.7238e-05	2.48484e-05	2.3268e-05	3.2551e-05	2.30928e-05	2.1565e-05	2.13546e-05	1.76466e-05	2.19898e-05	2.16537e-05	3.55016e-05	3.50169e-05	3.39031e-05	2.93502e-05	2.09021e-05	1.85697e-05	1.51553e-05	1.90658e-05
Candidatus_Midichloria	9.10435e-08	0	3.55059e-07	0	0	0	1.48522e-07	0	1.05468e-07	0	0	0	0	0	0	0	8.005e-07	7.05223e-07	0	0	2.75776e-07	0	0	2.63029e-07
Candidatus_Moanabacter	2.93411e-06	3.17522e-06	5.23412e-06	4.46956e-06	2.95224e-06	3.42516e-06	2.32565e-06	3.16199e-06	3.15399e-06	3.73225e-06	3.38521e-06	2.52872e-06	2.88189e-06	2.59738e-06	3.81623e-06	4.69668e-06	2.40009e-06	3.91305e-06	4.23319e-06	2.84203e-06	3.95256e-06	2.01733e-06	3.01425e-06	1.91754e-06
Candidatus_Moduliflexus	1.42589e-05	1.39598e-05	1.79298e-05	1.78866e-05	1.5649e-05	1.59472e-05	2.02996e-05	1.9906e-05	1.90925e-05	1.82411e-05	2.10972e-05	1.87242e-05	1.69158e-05	1.56567e-05	2.19276e-05	1.93074e-05	1.6547e-05	1.49423e-05	1.64914e-05	1.77146e-05	1.91719e-05	1.54851e-05	1.66044e-05	1.96814e-05
Candidatus_Moranella	1.2486e-07	0	1.06518e-07	6.58083e-07	9.72201e-08	1.10257e-07	1.11392e-07	1.07181e-07	8.799e-07	0	6.45994e-07	2.98962e-07	1.00058e-07	9.70262e-08	0	6.25355e-07	5.56538e-07	9.67163e-07	4.84052e-07	5.97762e-07	0	0	3.70955e-07	1.37151e-07
Candidatus_Muirbacterium	6.96561e-07	5.5888e-07	4.76576e-07	2.15738e-07	3.49894e-07	1.42267e-07	8.38431e-08	0	3.84115e-07	4.15667e-07	4.23404e-08	0	2.57798e-07	1.40327e-08	6.0391e-08	0	6.81202e-07	1.8472e-07	1.15747e-06	1.79007e-06	2.40531e-06	7.65472e-07	1.04392e-06	2.78058e-07
Candidatus_Nanopelagicus	0	0	0	0	2.48978e-07	1.8084e-07	9.50904e-08	0	4.32535e-07	7.43593e-07	0	1.70141e-07	1.57395e-07	0	1.75281e-07	0	4.75094e-07	9.63232e-07	4.13215e-07	1.27571e-07	0	0	0	0
Candidatus_Nanopusillus	7.18952e-07	2.87072e-07	4.4307e-07	7.66832e-07	7.8584e-07	9.54696e-07	6.58672e-07	8.22629e-07	4.00973e-07	3.88493e-07	3.88898e-07	5.60629e-07	7.26544e-07	7.82397e-07	5.08263e-07	7.58474e-07	4.10267e-07	1.38439e-07	1.56358e-07	1.63519e-07	1.89723e-07	3.27328e-07	3.62131e-07	4.87337e-08
Candidatus_Nanosalinarum	0	0	0	0	0	0	0	0	0	0	0	0	0	0	0	0	0	0	0	4.54819e-07	0	0	0	0
Candidatus_Neoehrlichia	0	3.15521e-07	0	0	0	1.02906e-07	0	0	0	0	0	0	0	0	2.87461e-07	0	0	0	0	0	0	0	0	0
Candidatus_Nephrothrix	6.63489e-06	6.99515e-06	7.05091e-06	4.56603e-06	7.37958e-06	7.73151e-06	4.76165e-06	3.89041e-06	4.24186e-06	5.06887e-06	2.59579e-06	3.29155e-06	8.00667e-06	1.53343e-05	3.50796e-06	4.53327e-06	5.97305e-06	6.00009e-06	3.21142e-06	3.54791e-06	1.18784e-05	1.96163e-06	5.12986e-06	4.17504e-06
Candidatus_Nesciobacter	0	0	8.01746e-08	0	0	0	0	0	1.65573e-07	8.38038e-08	0	7.50083e-08	0	0	0	5.16716e-06	0	0	0	0	0	0	1.86142e-07	0
Candidatus_Nitrosocaldus	8.34547e-06	7.39746e-06	6.02008e-06	7.43864e-06	6.26247e-06	9.16515e-06	8.67581e-06	6.70251e-06	9.21493e-06	9.38694e-06	1.22675e-05	1.25664e-05	8.26984e-06	8.28311e-06	7.89489e-06	1.09909e-05	8.74063e-06	8.71458e-06	9.09814e-06	8.87101e-06	1.15917e-05	8.56968e-06	9.52568e-06	1.04822e-05
Candidatus_Nitrosocosmicus	0.000267338	0.000212889	0.000234455	0.000214597	0.000316888	0.000363227	0.000316062	0.000315871	0.000230187	0.000236942	0.000323026	0.000316066	0.000223171	0.000219185	0.000189341	0.000237644	0.000265163	0.000267725	0.00031937	0.000276373	0.000335626	0.00029629	0.000257416	0.000329129
Candidatus_Nitrosoglobus	1.03502e-05	8.83886e-06	6.20961e-06	6.69341e-06	6.14699e-06	8.49706e-06	5.02691e-06	8.55524e-06	1.01925e-05	5.13553e-06	5.32301e-06	6.66787e-06	3.89114e-06	6.01337e-06	8.59597e-06	4.31817e-06	4.50572e-06	5.67055e-06	7.77368e-06	6.26119e-06	5.85914e-06	6.40996e-06	5.64831e-06	7.56319e-06
Candidatus_Nitrosomarinus	0	1.51429e-07	0	8.27457e-07	0	1.95822e-07	3.97827e-08	1.1198e-07	5.20211e-08	3.81735e-07	2.39101e-07	2.19132e-07	0	0	0	2.69477e-07	5.08807e-07	8.2236e-07	8.44543e-07	3.73601e-07	1.11517e-06	3.04136e-07	9.6284e-07	5.21662e-08
Candidatus_Nitrosopelagicus	1.49464e-06	1.38586e-06	8.69359e-07	1.31956e-06	9.08344e-07	1.29968e-06	1.00949e-06	1.02386e-06	7.08091e-07	1.31456e-06	2.01811e-06	1.45432e-06	1.39205e-06	2.04017e-06	9.17567e-07	8.22931e-07	2.44032e-06	4.42338e-06	1.47041e-06	2.61114e-06	3.5511e-06	3.39384e-06	2.46127e-06	2.15218e-06
Candidatus_Nitrosotalea	0.00018806	0.000347285	9.82127e-05	0.000183669	0.000182261	0.000253899	0.000118644	0.000171756	2.75408e-05	4.29864e-05	3.58059e-05	3.15922e-05	0.000622753	0.00122822	0.000137469	0.000734076	2.09781e-05	2.72226e-05	2.82139e-05	2.63755e-05	3.00677e-05	2.37759e-05	2.88049e-05	2.66098e-05
Candidatus_Nitrosotenuis	1.60534e-05	1.52459e-05	1.37801e-05	1.43008e-05	1.50426e-05	1.76303e-05	1.87971e-05	1.7115e-05	1.67871e-05	1.69237e-05	2.0496e-05	2.2761e-05	1.52928e-05	1.40371e-05	1.37542e-05	1.54535e-05	2.4188e-05	2.5927e-05	2.30518e-05	2.28531e-05	2.41602e-05	2.43547e-05	2.14515e-05	2.77402e-05
Candidatus_Nitrotoga	5.5954e-05	5.93771e-05	5.76516e-05	6.54385e-05	5.32617e-05	5.80877e-05	4.96987e-05	5.19848e-05	5.65611e-05	4.36179e-05	5.9139e-05	5.25585e-05	5.29488e-05	4.06424e-05	5.32248e-05	3.99177e-05	5.32646e-05	4.42989e-05	3.96909e-05	4.29001e-05	4.76705e-05	4.08619e-05	4.74455e-05	6.41979e-05
Candidatus_Nucleicultrix	1.65872e-06	6.68593e-07	7.19024e-07	1.00374e-06	3.13422e-07	8.91853e-07	5.67811e-07	6.15653e-07	5.26436e-07	1.9984e-07	6.31401e-07	4.32531e-07	1.93243e-06	8.69654e-07	4.80596e-07	4.03489e-07	2.49729e-07	8.67967e-07	3.98929e-07	5.22907e-07	0	5.18226e-07	6.93607e-07	8.00251e-07
Candidatus_Odyssella	5.18325e-07	1.02442e-07	4.93855e-07	9.35769e-07	5.2097e-07	9.51109e-07	4.91852e-07	0	2.09833e-06	3.00129e-07	1.50405e-06	1.56153e-06	2.41782e-07	1.15404e-06	4.27634e-07	1.37946e-06	1.8846e-06	9.35912e-07	3.22701e-07	5.87872e-07	6.81666e-07	6.69773e-07	1.21558e-06	1.07871e-07
Candidatus_Omnitrophus	2.64854e-07	7.26404e-07	4.2365e-07	8.36515e-07	2.06225e-07	5.02717e-07	7.68402e-07	1.07952e-07	8.48783e-07	1.23176e-06	1.42168e-07	1.52468e-06	1.34922e-06	5.69889e-07	1.72745e-06	1.59469e-06	1.44794e-06	1.52827e-06	0	8.71745e-07	1.18452e-06	7.08637e-07	1.21093e-06	1.15521e-06
Candidatus_Ozemobacter	4.04956e-06	4.07429e-06	4.61966e-06	3.93885e-06	3.6195e-06	4.02274e-06	3.06934e-06	4.18555e-06	5.24956e-06	2.27044e-06	2.80125e-06	2.21095e-06	3.61737e-06	4.17912e-06	4.2694e-06	4.28377e-06	4.28098e-06	3.50145e-06	2.07396e-06	2.6665e-06	2.04041e-06	2.45167e-06	1.73057e-06	3.51872e-06
Candidatus_Paceibacter	8.91855e-08	1.69547e-07	2.42551e-07	2.97891e-07	0	4.82486e-07	0	3.4495e-07	0	0	5.70517e-07	0	6.68413e-07	4.27685e-07	1.40589e-07	2.83709e-07	2.03361e-07	8.29674e-07	3.32192e-07	1.53836e-07	9.32362e-08	2.82526e-07	5.43589e-07	9.27589e-07
Candidatus_Paracaedibacter	8.9626e-07	2.43933e-06	3.65937e-07	1.77457e-06	2.55588e-06	1.62423e-06	2.23575e-06	1.35305e-06	2.54405e-06	1.70056e-06	1.49606e-06	1.29374e-06	1.23117e-06	3.10355e-06	2.78896e-06	1.47176e-06	2.09343e-06	2.4065e-06	1.94886e-06	1.6106e-06	8.86363e-07	1.46633e-06	7.67986e-07	4.03501e-07
Candidatus_Paracaedimonas	1.29145e-06	3.51865e-06	1.98186e-06	3.86782e-07	8.74164e-07	1.41178e-06	9.2162e-07	4.07754e-08	3.30607e-06	1.14839e-06	9.06703e-07	1.86673e-06	6.92306e-07	3.96982e-07	7.49859e-07	9.0658e-07	1.02565e-06	2.85053e-06	5.69638e-07	1.3166e-06	0	3.93169e-07	4.57146e-07	3.47846e-07
Candidatus_Parvarchaeum	3.2371e-07	5.55596e-07	1.84105e-07	0	0	0	9.62643e-08	7.89755e-08	2.8068e-07	0	1.72377e-07	0	8.64703e-08	3.57465e-07	8.87226e-08	0	2.29163e-07	0	0	2.46137e-07	9.33719e-07	6.03666e-07	6.69278e-07	4.0346e-07
Candidatus_Pelagibacter	7.91545e-06	7.81736e-06	8.94225e-06	7.78347e-06	7.96484e-06	9.90225e-06	8.09475e-06	5.03199e-06	6.87452e-06	6.5725e-06	6.50004e-06	8.34741e-06	9.3758e-06	1.1242e-05	6.84462e-06	6.52214e-06	1.01128e-05	9.51972e-06	7.52225e-06	7.88192e-06	9.76042e-06	8.80434e-06	8.12336e-06	1.11119e-05
Candidatus_Peribacter	1.44817e-06	1.37672e-06	3.28528e-07	1.62236e-06	7.25836e-07	8.51746e-07	2.67558e-07	1.10196e-06	1.58201e-07	5.33819e-08	5.4657e-07	8.9433e-08	0	8.04223e-07	7.04562e-08	3.79646e-07	8.25374e-08	0	3.39889e-07	0	9.38811e-08	0	0	8.99615e-07
Candidatus_Phaeomarinobacter	6.69562e-06	4.2565e-06	3.32608e-06	4.15325e-06	3.37843e-06	3.78852e-06	3.40508e-06	3.19088e-06	4.33694e-06	4.43017e-06	3.92684e-06	4.64246e-06	5.57592e-06	3.77299e-06	3.63001e-06	5.56233e-06	6.27911e-06	5.62207e-06	7.11402e-06	4.55069e-06	2.26606e-06	2.49613e-06	2.30816e-06	4.36741e-06
Candidatus_Photodesmus	0	0	0	0	0	0	1.06814e-07	0	0	2.9976e-07	3.09723e-07	0	0	0	0	0	1.33417e-07	0	1.5472e-07	0	1.20888e-07	0	0	2.63029e-07
Candidatus_Phycorickettsia	0	0	5.57624e-07	1.1033e-07	1.9631e-07	4.68272e-07	0	0	0	8.56456e-08	3.31279e-07	6.79662e-07	0	7.46356e-08	0	8.01737e-08	0	0	0	2.29908e-07	0	3.44287e-07	0	0
Candidatus_Phycosocius	1.48956e-06	1.09545e-06	4.76218e-07	2.15142e-06	9.98446e-07	5.87765e-07	1.1728e-06	1.71369e-06	8.01329e-07	6.45149e-07	1.19137e-06	2.2311e-07	2.92422e-06	8.45928e-07	1.97269e-06	1.1545e-06	1.25399e-06	2.12341e-06	4.94923e-07	1.46754e-06	1.64758e-06	6.26898e-07	1.56623e-06	1.1243e-06
Candidatus_Phytoplasma	6.0703e-07	1.23999e-06	8.83783e-07	5.69783e-07	1.49734e-06	8.88267e-07	1.20395e-06	4.75469e-07	5.91427e-07	8.4527e-07	1.30844e-06	1.0307e-06	1.50061e-06	1.94853e-06	4.15854e-07	6.49327e-07	7.70479e-07	9.30678e-07	1.38054e-06	1.51414e-06	1.80551e-06	1.38961e-06	1.59417e-06	8.4536e-07
Candidatus_Planktophila	1.11629e-06	7.07666e-07	4.99017e-06	4.74496e-07	1.03409e-06	1.46235e-06	7.49494e-07	5.83369e-07	1.19366e-07	8.49542e-07	6.56735e-07	9.35937e-07	9.49087e-07	3.85839e-07	3.94011e-07	2.52855e-06	1.59193e-06	2.03418e-06	2.13863e-06	1.3919e-06	2.52138e-07	6.04215e-07	5.79007e-07	1.02611e-06
Candidatus_Prometheoarchaeum	3.82782e-07	2.83526e-07	5.44251e-08	1.15967e-07	1.38959e-06	5.91502e-07	5.69154e-07	0	0	6.25776e-07	3.70449e-07	3.05508e-07	2.04499e-07	1.48726e-07	1.04913e-07	1.59762e-07	0	0	0	7.63564e-08	3.55119e-07	3.32419e-07	2.97194e-07	1.40154e-07
Candidatus_Promineofilum	3.20004e-05	3.00654e-05	2.69861e-05	3.3198e-05	2.90012e-05	2.85393e-05	3.08775e-05	2.56019e-05	4.0573e-05	4.19974e-05	4.93888e-05	4.18897e-05	4.0071e-05	3.47322e-05	4.64773e-05	3.39587e-05	3.9741e-05	4.14911e-05	3.77286e-05	4.07134e-05	4.1402e-05	3.40024e-05	3.7407e-05	3.23131e-05
Candidatus_Protochlamydia	4.39999e-06	5.83345e-06	3.83231e-06	5.15296e-06	7.2077e-06	4.90373e-06	4.26284e-06	4.54557e-06	6.08477e-06	7.24364e-06	8.01431e-06	5.38171e-06	2.36888e-05	2.9019e-05	1.27329e-05	2.57656e-05	5.13053e-06	2.45525e-06	4.06064e-06	3.2572e-06	6.11435e-06	4.51608e-06	5.65695e-06	4.33931e-06
Candidatus_Puniceispirillum	1.4714e-06	1.19701e-06	2.13646e-06	3.01003e-06	1.62808e-06	1.74714e-06	1.5767e-06	7.67609e-07	6.47432e-07	1.0368e-06	2.39382e-06	1.75372e-06	1.64736e-06	1.17216e-06	2.71941e-07	1.063e-06	2.3903e-06	2.14096e-06	2.54622e-06	6.31595e-07	7.82164e-07	6.60358e-07	7.5324e-07	2.51529e-06
Candidatus_Reconcilibacillus	2.54256e-06	2.724e-06	2.96423e-06	3.8184e-06	2.57268e-06	1.77108e-06	4.70308e-06	2.28456e-06	1.46176e-06	2.0436e-06	2.35738e-06	1.72093e-06	1.4375e-06	2.46024e-06	2.8073e-06	3.21441e-06	1.76633e-06	3.27932e-06	8.27182e-07	8.70156e-07	1.25898e-06	2.07813e-06	1.14805e-06	2.58266e-06
Candidatus_Regiella	0	4.50745e-07	0	3.13569e-07	0	8.97437e-08	0	0	0	8.65972e-08	0	0	7.78232e-08	1.5093e-07	0	9.59975e-08	5.487e-07	1.25373e-07	1.25495e-07	0	1.24607e-06	0	0	0
Candidatus_Reidiella	3.75211e-06	1.64181e-06	2.52211e-06	3.40144e-06	1.90517e-06	3.10135e-06	2.68606e-06	3.33144e-06	4.46367e-06	2.45535e-06	3.68599e-06	5.32782e-06	2.36494e-06	2.17191e-06	2.3866e-06	1.60761e-06	1.93034e-06	3.41055e-06	1.77585e-06	2.39619e-06	1.81994e-06	1.7574e-06	1.92393e-06	1.54429e-06
Candidatus_Rhabdochlamydia	2.33796e-07	1.47777e-06	2.7768e-07	2.51075e-06	5.13289e-07	4.08557e-07	7.36911e-07	1.94829e-06	1.21685e-06	2.36929e-06	4.60655e-07	1.34218e-06	3.42657e-06	4.83758e-06	2.23542e-06	3.91906e-06	1.67921e-07	3.00895e-07	0	9.94192e-07	6.75194e-07	3.68589e-07	7.1811e-07	3.88607e-07
Candidatus_Roseilinea	4.25902e-06	5.97634e-06	6.75837e-06	5.11526e-06	7.01653e-06	5.69915e-06	8.52045e-06	4.19979e-06	7.66498e-06	7.29605e-06	8.72482e-06	8.36382e-06	8.0609e-06	6.19159e-06	5.35617e-06	6.68367e-06	6.56448e-06	7.51799e-06	7.27369e-06	4.28941e-06	5.62843e-06	4.565e-06	3.71905e-06	6.08795e-06
Candidatus_Rubidus	5.01809e-07	2.31172e-07	4.65728e-07	9.62148e-08	4.69519e-07	1.46168e-06	4.25934e-07	5.86146e-08	8.71899e-07	4.09675e-07	0	1.24394e-06	1.9946e-06	2.95667e-06	1.53058e-06	2.75132e-06	1.55831e-07	1.18728e-06	9.03564e-08	0	7.05986e-08	4.35856e-07	6.92449e-08	4.06957e-07
Candidatus_Saccharicenans	3.22467e-06	3.13681e-06	1.57466e-06	3.30564e-06	3.16144e-06	2.21472e-06	4.63375e-06	3.20603e-06	1.26364e-06	1.4189e-06	1.95594e-06	8.80052e-07	9.92054e-07	2.1463e-06	2.31001e-06	2.6404e-06	2.97786e-06	2.33472e-06	1.57863e-06	2.51852e-06	3.61647e-06	1.17038e-06	7.46925e-07	1.12117e-06
Candidatus_Saccharimonas	7.06344e-06	5.22495e-06	9.42398e-06	9.28348e-06	3.24934e-06	4.60869e-06	2.8968e-06	1.93631e-06	2.0646e-05	3.13797e-05	2.08217e-05	1.58862e-05	1.4972e-05	1.07616e-05	2.35233e-05	1.62428e-05	1.0981e-05	1.26733e-05	1.3655e-05	1.19734e-05	3.00397e-05	2.721e-05	2.33432e-05	2.37613e-05
Candidatus_Scalindua	3.08502e-05	3.15453e-05	2.56892e-05	3.48576e-05	2.91909e-05	2.60356e-05	2.73222e-05	2.90672e-05	2.6812e-05	3.59427e-05	2.64192e-05	3.05766e-05	3.04389e-05	2.84822e-05	2.52495e-05	2.7508e-05	2.56289e-05	2.3753e-05	3.32865e-05	2.00965e-05	2.63594e-05	2.28785e-05	2.08257e-05	2.45698e-05
Candidatus_Schmidhempelia	0	0	0	0	0	0	0	0	0	0	3.05538e-07	0	0	0	2.69495e-07	0	4.9237e-06	0	0	0	0	0	5.16753e-07	0
Candidatus_Similichlamydia	0	0	0	0	0	0	0	0	3.99955e-07	0	0	0	0	3.77324e-07	0	0	0	0	0	0	0	0	0	0
Candidatus_Soleaferrea	5.98642e-08	6.48331e-07	3.92433e-07	1.08819e-07	3.26287e-07	1.58588e-07	2.67035e-07	1.9918e-07	0	5.33819e-08	1.03241e-07	0	1.41361e-07	7.59531e-07	1.96891e-07	1.99885e-07	0	0	1.48612e-07	4.18433e-07	0	3.41008e-07	0	0
Candidatus_Solibacter	0.00215624	0.00253099	0.00235781	0.0022513	0.00285657	0.00279565	0.00267997	0.00264431	0.00136196	0.00136374	0.00153923	0.00154432	0.00159826	0.0015364	0.00161915	0.00192024	0.000953066	0.000914995	0.000870238	0.000802473	0.00100618	0.000826301	0.000925605	0.00102142
Candidatus_Stahlbacteria	6.3323e-06	9.2077e-06	5.4095e-06	8.1954e-06	6.57654e-06	5.22222e-06	4.57329e-06	6.26138e-06	4.96561e-06	5.56714e-06	6.77594e-06	7.03299e-06	6.78798e-06	8.7647e-06	6.15591e-06	6.40392e-06	4.4893e-06	3.82378e-06	6.5303e-06	6.46314e-06	7.63072e-06	6.20506e-06	3.537e-06	5.54002e-06
Candidatus_Stoquefichus	0	0	0	0	0	0	0	0	0	0	0	0	2.82994e-07	6.86044e-08	0	0	0	0	1.01145e-06	1.56132e-07	0	1.24697e-07	0	0
Candidatus_Sulfobium	6.40825e-06	7.93057e-06	7.27995e-06	7.39373e-06	7.07543e-06	6.28088e-06	5.57329e-06	7.65854e-06	6.35869e-06	6.57432e-06	6.04139e-06	4.03409e-06	7.24773e-06	6.44583e-06	9.58688e-06	7.30664e-06	7.48492e-06	3.76421e-06	7.18145e-06	5.19887e-06	2.57484e-06	5.32713e-06	6.93256e-06	5.69243e-06
Candidatus_Sulfopaludibacter	0.00221885	0.00269746	0.00226053	0.00237648	0.00305222	0.00302264	0.00282375	0.00282956	0.00129855	0.00130704	0.00147804	0.00145769	0.00153742	0.0014349	0.00153086	0.00176027	0.000982265	0.000879512	0.000916534	0.000867804	0.00106429	0.000887386	0.000923632	0.00101339
Candidatus_Sulfotelmatobacter	0.000685182	0.00102726	0.000791113	0.00074911	0.00111108	0.00107279	0.00110349	0.00109483	0.000237805	0.000247205	0.000208876	0.000240991	0.000365289	0.000396873	0.000347525	0.000457533	0.00010429	9.26029e-05	9.2307e-05	9.76049e-05	0.000133585	0.000109406	0.000160328	0.000147694
Candidatus_Sulfotelmatomonas	0.000233639	0.000418456	0.000316227	0.000230828	0.000363738	0.000506872	0.000402226	0.000881173	7.12758e-05	8.24079e-05	6.76299e-05	7.39927e-05	0.000215275	0.000234577	0.00020584	0.000280888	4.0762e-05	3.5829e-05	3.81342e-05	3.98407e-05	4.46731e-05	3.75492e-05	4.54919e-05	4.74178e-05
Candidatus_Sumerlaea	2.68176e-06	2.87341e-06	3.41442e-06	2.65648e-06	1.66947e-06	3.60492e-06	4.43028e-06	3.83901e-06	2.84152e-06	3.33225e-06	4.03913e-06	4.10434e-06	4.6784e-06	2.7431e-06	2.9864e-06	4.38466e-06	2.2596e-06	3.11229e-06	4.68719e-06	2.47425e-06	3.06331e-06	1.97621e-06	2.49701e-06	2.4353e-06
Candidatus_Symbiobacter	1.66607e-06	2.80012e-06	1.85488e-06	2.62703e-06	3.11209e-06	2.42581e-06	1.65135e-06	1.86118e-06	2.59334e-06	1.60988e-06	2.96422e-06	2.02806e-06	1.3266e-06	2.66123e-06	2.87872e-06	3.49501e-06	2.24474e-06	3.88425e-06	2.44975e-06	2.60591e-06	1.87486e-06	2.74366e-06	2.48564e-06	2.20795e-06
Candidatus_Symbiothrix	5.40419e-07	8.35338e-07	4.59059e-07	6.77659e-07	5.30033e-07	4.54698e-07	6.85456e-07	7.46534e-08	1.54627e-06	1.29628e-06	1.62129e-06	1.78427e-06	6.12518e-07	5.97401e-07	1.35139e-06	7.23988e-07	1.44033e-06	1.13384e-06	2.25341e-06	2.35783e-07	4.99986e-07	1.36487e-06	1.09361e-06	8.54422e-07
Candidatus_Syntrophoarchaeum	5.18142e-07	3.41713e-07	7.31003e-08	8.67254e-07	3.81745e-07	4.95649e-07	7.48079e-07	7.10408e-07	1.0399e-06	4.9517e-07	7.21212e-07	1.49177e-06	8.34698e-07	1.47778e-06	3.31643e-07	5.23134e-07	7.36628e-07	5.86216e-07	1.25484e-06	1.49998e-06	5.45719e-07	8.68409e-07	9.72541e-08	1.19132e-06
Candidatus_Syntrophocurvum	0	3.19903e-07	0	2.11833e-07	1.81478e-07	3.21582e-07	0	0	1.04042e-07	2.7078e-07	0	9.42672e-08	2.55649e-07	3.63455e-07	9.71153e-08	0	5.06207e-07	0	4.34406e-07	0	0	0	0	0
Candidatus_Syntrophonatronum	0	0	2.72967e-07	1.72297e-07	8.19929e-08	2.14683e-08	5.2635e-07	2.71181e-07	0	0	0	0	0	0	0	0	2.86453e-07	0	0	1.02557e-07	0	0	0	0
Candidatus_Syntrophosphaera	8.48561e-08	1.76431e-07	4.78328e-07	2.31372e-07	3.90577e-07	0	1.51406e-07	0	0	9.86551e-08	1.908e-07	8.83009e-08	0	2.17853e-07	9.09688e-08	1.84704e-07	2.46568e-07	0	4.47309e-07	0	0	3.2606e-07	0	0
Candidatus_Tenderia	1.46407e-05	1.34665e-05	1.52203e-05	1.5205e-05	1.16104e-05	1.40395e-05	1.38916e-05	1.58921e-05	1.24253e-05	1.75546e-05	1.66532e-05	1.53304e-05	1.75312e-05	1.15985e-05	1.68564e-05	1.59307e-05	9.67722e-06	1.4072e-05	1.01142e-05	1.32141e-05	1.53905e-05	1.08032e-05	1.22429e-05	1.5896e-05
Candidatus_Termititenax	5.74943e-07	1.28173e-06	3.46678e-07	5.27959e-07	1.7858e-06	8.03926e-07	6.61069e-07	2.96478e-07	3.68207e-07	1.69299e-06	9.59715e-07	3.95422e-07	2.04036e-07	1.24686e-06	5.8725e-07	2.80857e-07	1.67921e-07	4.44297e-07	1.56027e-06	1.43299e-07	4.10457e-08	1.38912e-07	0	5.94793e-07
Candidatus_Thalassarchaeum	1.40173e-06	4.34455e-06	2.74939e-06	1.88228e-06	8.05858e-07	4.71165e-07	2.14565e-07	4.41082e-07	1.47864e-07	6.0941e-07	4.4017e-06	9.74965e-08	1.66447e-06	3.69631e-06	2.74372e-06	3.38147e-06	1.40901e-06	1.23656e-06	1.81877e-08	3.83908e-07	1.72237e-06	1.69236e-07	1.40191e-07	5.45668e-06
Candidatus_Thermochlorobacter	6.55926e-06	3.95997e-06	5.28747e-06	4.73439e-06	5.68988e-06	5.6595e-06	6.92725e-06	5.76235e-06	5.16999e-06	5.34894e-06	6.72693e-06	4.5977e-06	5.39009e-06	4.32782e-06	5.99241e-06	7.09904e-06	4.00034e-06	1.8003e-06	3.3345e-06	4.2862e-06	6.62686e-06	4.34142e-06	3.28689e-06	6.73563e-06
Candidatus_Thermokryptus	4.65469e-06	6.10882e-06	6.98256e-06	5.82425e-06	7.71491e-06	6.75671e-06	6.41093e-06	4.10692e-06	6.22091e-06	7.34014e-06	4.83355e-06	5.49702e-06	3.74195e-06	4.61757e-06	6.0305e-06	4.91745e-06	3.96733e-06	3.2342e-06	4.84466e-06	5.222e-06	4.35003e-06	5.18408e-06	4.20216e-06	8.0838e-06
Candidatus_Thiodiazotropha	1.25787e-05	1.02989e-05	1.01987e-05	1.70645e-05	9.01765e-06	1.07686e-05	1.78163e-05	1.10211e-05	1.04333e-05	9.86723e-06	1.0113e-05	1.15077e-05	9.28224e-06	8.72554e-06	1.02382e-05	8.74947e-06	8.08012e-06	1.07936e-05	1.14422e-05	9.27837e-06	1.13456e-05	8.07995e-06	8.60818e-06	1.10247e-05
Candidatus_Thiodubiliella	4.43635e-07	1.56199e-07	5.43684e-07	1.24044e-07	7.77761e-08	6.45056e-07	0	1.49934e-07	6.67424e-07	1.02427e-06	1.92982e-07	2.50769e-07	2.62947e-07	9.8317e-07	9.19637e-07	8.58072e-07	1.60578e-06	3.50856e-07	9.52401e-07	1.07594e-06	8.12e-07	2.38323e-06	1.45027e-06	1.45698e-06
Candidatus_Thioglobus	7.68604e-06	5.30035e-06	5.88373e-06	7.00262e-06	5.83807e-06	3.78684e-06	5.10458e-06	4.97302e-06	8.5123e-06	6.96168e-06	6.45342e-06	7.06564e-06	5.61445e-06	1.06843e-05	6.33468e-06	4.84759e-06	7.61043e-06	6.27902e-06	7.0495e-06	1.20214e-05	1.91338e-05	9.73473e-06	1.02509e-05	8.01597e-06
Candidatus_Thiosymbion	1.23887e-05	1.06733e-05	1.22414e-05	1.18096e-05	1.00686e-05	9.74755e-06	1.0608e-05	7.59997e-06	1.30965e-05	1.47398e-05	1.05541e-05	9.13261e-06	1.26731e-05	9.24124e-06	1.36836e-05	1.00845e-05	9.10632e-06	9.19954e-06	1.11321e-05	8.08192e-06	1.10009e-05	1.10144e-05	7.36366e-06	1.3469e-05
Candidatus_Tokpelaia	6.63585e-07	3.8768e-07	1.15392e-06	6.76904e-07	2.80351e-07	3.06159e-07	9.34521e-07	9.61099e-07	1.45993e-06	1.05066e-06	5.97382e-07	2.45506e-07	7.21938e-07	1.66693e-06	6.22726e-07	1.68291e-06	1.53337e-06	2.01411e-06	1.41626e-06	1.54267e-06	6.79975e-07	1.22189e-06	6.99402e-07	1.02681e-06
Candidatus_Tremblaya	0	0	0	0	2.00159e-07	0	0	0	0	0	0	0	0	0	0	5.36457e-07	0	0	0	0	0	0	0	0
Candidatus_Udaeobacter	7.98215e-05	7.0692e-05	8.27601e-05	7.00029e-05	6.7137e-05	7.26741e-05	6.56483e-05	6.1045e-05	6.0809e-05	6.68781e-05	6.35684e-05	6.50385e-05	7.23391e-05	5.73996e-05	6.44833e-05	7.21539e-05	5.4677e-05	4.25633e-05	4.14884e-05	4.27562e-05	6.6938e-05	5.53176e-05	6.17973e-05	6.72851e-05
Candidatus_Vecturithrix	2.69307e-05	2.51156e-05	2.3851e-05	2.60602e-05	2.07524e-05	2.32322e-05	2.17272e-05	1.68277e-05	3.51491e-05	2.98711e-05	3.20397e-05	2.92392e-05	3.19566e-05	3.63405e-05	2.81924e-05	4.1195e-05	2.35654e-05	2.2949e-05	2.38441e-05	2.25177e-05	3.05877e-05	2.08347e-05	2.23219e-05	2.87067e-05
Candidatus_Viridilinea	2.94528e-05	3.20473e-05	3.14133e-05	2.66225e-05	3.35144e-05	2.99548e-05	2.91782e-05	3.06692e-05	3.44724e-05	2.92422e-05	3.75501e-05	4.27169e-05	4.11032e-05	3.77451e-05	3.90131e-05	3.54062e-05	3.01505e-05	2.95734e-05	2.25587e-05	2.65921e-05	3.03487e-05	2.51129e-05	3.13044e-05	3.97083e-05
Candidatus_Xiphinematobacter	3.89093e-07	0	5.64466e-07	5.5165e-07	5.75276e-07	8.17783e-07	0	4.26288e-07	8.4371e-07	1.09967e-06	1.03997e-06	4.26631e-07	6.47716e-07	1.83082e-07	2.45162e-07	1.22619e-07	3.97025e-07	9.48199e-08	0	0	1.14608e-07	5.79788e-07	3.85197e-07	9.55214e-08
Candidimonas	6.88403e-05	8.25775e-05	6.85237e-05	9.96238e-05	6.95709e-05	6.98401e-05	7.07708e-05	6.50223e-05	5.28098e-05	5.97014e-05	5.8169e-05	5.88044e-05	6.78331e-05	6.43098e-05	7.27876e-05	6.00525e-05	4.22099e-05	4.55199e-05	3.46162e-05	4.513e-05	5.41022e-05	4.71397e-05	5.49249e-05	6.21731e-05
Canibacter	7.04853e-08	0	0	0	1.09765e-07	1.4398e-07	3.31759e-07	1.46743e-07	0	0	0	0	3.08261e-07	0	0	8.38599e-08	3.14175e-07	0	0	0	1.42336e-07	0	0	0
Cantharellus	6.67189e-08	0	0	0	1.03899e-07	0	0	5.72723e-08	1.39257e-06	3.24979e-07	9.30444e-08	3.52372e-07	0	0	1.09718e-07	5.56932e-08	0	9.01264e-07	1.39439e-07	7.98537e-08	0	0	2.13719e-07	2.37051e-07
Capnocytophaga	9.85938e-06	8.871e-06	1.00364e-05	1.17792e-05	6.29112e-06	7.67197e-06	1.09171e-05	7.69257e-06	1.14727e-05	8.77456e-06	8.76228e-06	9.66423e-06	9.38697e-06	9.46388e-06	1.05307e-05	8.80353e-06	1.38135e-05	1.24724e-05	1.55314e-05	1.17024e-05	1.14643e-05	6.55896e-06	9.85564e-06	1.0082e-05
Caprobacter	4.73099e-07	0	1.56335e-07	3.40447e-07	2.65234e-07	0	0	9.24987e-07	2.93613e-07	2.16675e-07	2.76775e-07	7.64855e-07	1.46855e-07	1.11568e-07	4.1377e-07	2.86895e-07	0	0	0	0	0	3.17267e-07	0	0
Caproiciproducens	1.46254e-06	1.80065e-06	1.15178e-06	1.89359e-06	8.56813e-07	9.04293e-07	1.37297e-06	1.47675e-06	7.56002e-07	8.57674e-07	2.9167e-07	6.66245e-07	9.75946e-07	8.97599e-07	1.44199e-06	8.54275e-07	4.71954e-07	2.34684e-07	9.25782e-08	4.6083e-08	1.50086e-07	1.10414e-07	1.90652e-07	1.69173e-07
Capronia	0	7.73336e-08	1.05411e-07	7.8651e-08	2.682e-07	0	1.54404e-07	1.41812e-06	0	7.71659e-08	0	2.17638e-07	6.86676e-08	1.75729e-07	0	3.59054e-07	6.20279e-07	2.05156e-07	1.02678e-07	9.50985e-08	0	3.79759e-07	0	0
Capsulimonas	0.000107007	0.000152205	0.000119305	0.000135669	0.000174751	0.000186206	0.000188901	0.000160858	0.000114282	0.000117156	0.00011438	0.000110012	0.00011369	0.00011508	0.000130524	0.000127266	7.76433e-05	6.66462e-05	5.97095e-05	6.3764e-05	0.000103012	7.73178e-05	9.46831e-05	0.000104899
Capulavirus	0	0	0	0	0	0	0	0	0	0	0	0	0	0	5.20763e-08	0	0	0	0	0	3.63162e-08	0	1.69359e-05	2.68943e-06
Carboxydocella	2.77655e-06	3.86413e-06	1.94587e-06	3.99322e-06	2.04542e-06	2.26873e-06	1.49017e-06	2.48505e-06	2.09957e-06	5.30444e-06	3.43544e-06	3.0635e-06	3.97618e-06	2.80365e-06	4.40764e-06	3.72391e-06	2.57256e-06	2.9569e-06	2.67326e-06	1.91709e-06	3.97884e-06	4.59346e-06	5.27823e-06	4.68393e-06
Carboxydothermus	1.77166e-06	3.18129e-06	3.6205e-06	3.14364e-06	2.38009e-06	2.34325e-06	1.94543e-06	3.01906e-06	2.35549e-06	2.98038e-06	3.00841e-06	4.19371e-06	2.03258e-06	3.54345e-06	2.70827e-06	4.25294e-06	4.15103e-06	4.10704e-06	1.64927e-06	1.57362e-06	3.85442e-06	2.05257e-06	3.02757e-06	2.56127e-06
Carboxylicivirga	4.22807e-07	9.86004e-08	2.46149e-07	3.64266e-07	5.7395e-07	0	2.19645e-07	3.21543e-07	9.0578e-08	1.19347e-06	4.54217e-07	4.26522e-07	8.40432e-07	9.65385e-07	4.49158e-07	8.6175e-07	5.86712e-07	8.90626e-07	8.1038e-07	5.04136e-07	7.35235e-07	0	1.08195e-07	1.81142e-07
Cardiobacterium	3.16447e-06	2.62171e-06	2.65708e-06	2.60219e-06	2.0157e-06	1.8667e-06	1.6989e-06	2.90515e-06	2.84981e-06	2.76195e-06	2.89852e-06	1.46879e-06	2.19357e-06	2.39612e-06	3.32483e-06	4.15217e-06	2.94548e-06	2.10985e-06	1.14466e-06	2.97999e-06	1.95345e-06	2.0321e-06	1.53962e-06	2.28047e-06
Carideicomes	1.76398e-05	3.34898e-05	4.06249e-05	4.56135e-06	2.13751e-05	4.69407e-06	3.4322e-06	4.97764e-06	1.941e-05	3.3478e-05	4.9024e-06	8.91127e-06	2.43997e-06	8.27035e-06	2.29569e-06	4.46508e-06	4.00575e-06	5.09331e-05	6.70265e-06	8.29778e-06	2.5867e-06	9.91968e-06	8.36043e-06	5.51832e-06
Carnimonas	1.15002e-07	0	0	1.04523e-07	0	0	1.02598e-07	0	1.95196e-07	2.92641e-07	7.87749e-07	4.2807e-07	9.21591e-08	6.40884e-07	8.00938e-07	9.48744e-07	1.18773e-07	1.37605e-07	4.47701e-07	3.92785e-07	0	1.57344e-06	2.3714e-07	2.3416e-07
Carnobacterium	5.56699e-08	1.59102e-06	3.77268e-07	1.01194e-07	9.9349e-08	1.62618e-07	6.0939e-08	6.07688e-07	1.71092e-07	5.6637e-07	1.2601e-07	5.0677e-07	1.76285e-06	5.57635e-07	1.13809e-06	6.27494e-07	0	8.23618e-08	3.29768e-07	3.05426e-07	4.2645e-06	0	5.28538e-07	8.07789e-07
Caryophanon	6.01e-07	6.19186e-07	8.35817e-07	9.11862e-07	8.50676e-08	7.0807e-08	7.19973e-07	2.8135e-07	3.73291e-07	1.43005e-07	7.0356e-07	5.49558e-07	7.2581e-07	6.85799e-07	6.8127e-07	3.7545e-07	6.72484e-07	2.54003e-07	1.0362e-07	6.08525e-07	2.42885e-07	3.65618e-07	1.9063e-07	6.31786e-07
Casimicrobium	9.75585e-05	7.86284e-05	0.000111352	8.83946e-05	7.75978e-05	8.65531e-05	7.34332e-05	6.59431e-05	7.35509e-05	7.62883e-05	9.08512e-05	7.05085e-05	6.20481e-05	5.03013e-05	7.61719e-05	6.49987e-05	6.87379e-05	5.92262e-05	5.49071e-05	5.59966e-05	6.81379e-05	6.70501e-05	8.10015e-05	8.64143e-05
Castellaniella	4.09795e-05	8.30877e-05	4.28612e-05	0.000152755	9.9715e-05	8.25386e-05	9.92642e-05	6.28674e-05	2.24155e-05	2.3067e-05	1.94912e-05	2.67554e-05	4.81633e-05	3.53038e-05	5.87233e-05	4.41755e-05	5.21677e-05	5.04056e-05	2.69269e-05	7.69351e-05	0.000270118	0.000109026	0.000196418	0.000138943
Catabacter	4.37209e-07	9.98485e-08	3.52424e-07	3.09497e-07	5.22389e-07	7.61881e-07	1.01265e-07	1.80787e-07	6.08955e-07	2.95965e-07	3.92897e-07	1.76602e-07	7.95615e-07	4.21317e-07	0	3.04609e-07	4.93135e-07	9.4729e-07	1.42969e-07	1.32416e-07	1.11707e-07	1.05756e-07	1.23652e-07	1.71168e-07
Catalinimonas	2.30219e-05	2.47892e-05	3.18388e-05	2.53805e-05	2.28851e-05	2.44372e-05	2.80539e-05	2.03631e-05	2.40965e-05	2.69276e-05	2.7133e-05	2.68463e-05	2.84428e-05	1.79439e-05	2.80826e-05	2.29547e-05	2.20167e-05	2.45628e-05	2.12658e-05	1.97726e-05	3.17318e-05	1.87226e-05	2.43808e-05	2.94474e-05
Catellatospora	0.000147272	0.000137439	0.000141221	0.000136235	0.000181794	0.000145707	0.000169879	0.000197435	0.000180008	0.000125036	0.000172732	0.000134511	0.000174559	0.000134973	0.000138511	0.000145674	0.000103338	0.00013336	9.7797e-05	0.000113014	0.000190685	0.000107749	0.000128316	0.000128541
Catelliglobosispora	4.59309e-05	5.19944e-05	4.85936e-05	4.47418e-05	5.08622e-05	4.3337e-05	4.85783e-05	5.3972e-05	0.00012742	5.1709e-05	6.31052e-05	6.22853e-05	0.000102106	5.13614e-05	6.20148e-05	5.23661e-05	6.03323e-05	6.03588e-05	3.46317e-05	0.000124956	7.84655e-05	4.68013e-05	4.56977e-05	5.30714e-05
Catenaria	1.21391e-07	3.33297e-07	1.81859e-07	2.00041e-07	1.33403e-07	6.5365e-07	2.16595e-07	9.35102e-07	1.38658e-06	8.81442e-07	1.1024e-06	2.95766e-06	7.84065e-07	2.85386e-06	8.39152e-07	1.16492e-06	2.22933e-06	1.60282e-06	2.24597e-06	3.41777e-06	1.10512e-06	5.36994e-06	3.78755e-06	1.56781e-06
Catenibacillus	3.71004e-07	2.3986e-07	0	0	8.60841e-07	5.25031e-08	1.31018e-07	0	0	0	0	0	4.00234e-07	2.28885e-07	0	1.45916e-07	0	0	0	0	0	0	0	0
Catenibacterium	3.45079e-06	2.93697e-06	3.68066e-06	3.09062e-06	3.50968e-06	3.79768e-06	3.98323e-06	3.8995e-06	1.46738e-06	2.53104e-06	3.31401e-06	2.97121e-06	2.09547e-06	2.53791e-06	3.63572e-06	2.43492e-06	1.91053e-06	2.39944e-06	3.61999e-06	1.97485e-06	4.58176e-06	3.08173e-06	3.47415e-06	2.70972e-06
Catenisphaera	0	0	0	3.40447e-07	0	0	1.11392e-07	0	0	0	0	0	0	0	0	0	0	0	0	0	0	0	0	0
Catenovulum	2.95432e-06	4.71903e-06	3.23959e-06	2.4265e-06	3.70773e-06	3.47157e-06	3.67761e-06	2.50045e-06	3.47175e-06	5.33336e-06	3.99613e-06	3.35037e-06	2.69414e-06	3.2862e-06	4.0157e-06	5.58952e-06	3.72714e-06	3.36567e-06	6.04345e-06	5.46872e-06	2.45004e-06	2.34996e-06	1.36538e-06	1.51704e-06
Catenulispora	7.9546e-05	0.000102671	0.00012272	0.000242767	0.000149519	0.000170138	0.000155204	0.000215546	7.16677e-05	8.84278e-05	8.65252e-05	6.54883e-05	8.24527e-05	9.25287e-05	7.28229e-05	0.000102537	0.000312471	0.000394926	0.000484501	0.000557542	0.000116259	0.000218969	0.000206233	0.000142183
Catenuloplanes	2.88897e-05	2.64557e-05	2.38091e-05	3.02716e-05	3.07717e-05	3.13677e-05	3.53715e-05	4.75159e-05	2.63279e-05	2.51836e-05	5.47298e-05	2.37823e-05	2.64411e-05	2.29259e-05	2.84638e-05	2.55812e-05	1.79817e-05	3.66858e-05	2.04399e-05	1.88018e-05	3.99197e-05	1.4405e-05	5.85743e-05	2.0969e-05
Catonella	0	0	0	0	0	0	0	3.04162e-07	0	0	0	0	0	0	0	0	0	0	0	0	0	0	0	0
Catovirus	0	0	0	0	0	0	0	0	0	0	0	0	0	0	0	0	0	0	0	0	0	0	4.38259e-07	0
Caulimovirus	5.59737e-07	0	4.93551e-07	1.04984e-07	7.61108e-07	5.04967e-07	4.23533e-08	1.87775e-06	2.51482e-06	3.39333e-06	1.03476e-06	3.50078e-06	2.61226e-06	8.13889e-06	1.66129e-06	2.26153e-06	2.98964e-06	4.95434e-06	5.16511e-06	7.26264e-06	1.26324e-06	1.1457e-05	8.15834e-06	1.92244e-06
Caulobacter	0.000724859	0.000898297	0.000795488	0.000928661	0.00111544	0.00102592	0.00126371	0.00125571	0.000648696	0.000540149	0.000532697	0.000679874	0.000595819	0.000627956	0.000556659	0.000707846	0.0004881	0.000501791	0.000474501	0.000463074	0.000551641	0.000464111	0.000689715	0.000661549
Caulochytrium	5.36207e-08	0	5.60381e-07	0	1.81478e-07	8.48127e-08	0	7.83095e-07	6.8301e-07	6.04511e-07	8.97214e-08	9.23983e-07	5.73929e-07	1.58951e-06	6.93685e-07	5.21129e-07	1.13358e-06	4.19988e-07	2.03982e-06	2.2572e-06	8.26001e-07	4.14221e-06	1.544e-06	1.02984e-06
Caviibacter	0	0	0	3.13569e-07	0	0	4.1039e-07	0	0	0	0	0	0	1.78733e-07	0	0	0	0	0	0	0	0	0	0
Cecembia	8.09942e-06	6.22777e-06	7.96677e-06	4.46329e-06	7.19417e-06	6.20344e-06	4.58551e-06	6.58418e-06	1.09886e-05	1.46345e-05	5.41378e-06	1.52914e-05	1.05566e-05	2.59071e-05	1.12421e-05	1.07094e-05	1.34118e-05	1.48959e-05	1.54942e-05	2.32422e-05	1.27694e-05	3.29759e-05	1.78747e-05	1.27825e-05
Cedecea	1.79509e-06	1.60546e-06	1.04742e-06	3.87709e-07	8.2484e-07	8.23916e-07	4.96199e-07	1.24487e-06	1.00812e-06	5.43172e-07	1.39093e-06	5.60458e-07	1.22179e-06	4.84781e-07	7.44397e-07	3.38475e-07	4.11525e-07	9.53541e-07	0	1.16254e-06	4.97173e-07	1.32998e-06	2.4382e-07	1.0434e-06
Ceetrepovirus	0	0	0	0	0	0	0	0	0	4.65299e-07	0	0	0	0	0	0	1.45364e-07	0	4.51782e-07	6.24527e-07	4.07747e-06	0	0	1.43292e-07
Celeribacter	2.77995e-06	5.53506e-06	4.23095e-06	4.8851e-06	3.2962e-06	5.07552e-06	5.885e-06	3.31911e-06	5.16661e-06	3.59503e-06	4.40055e-06	5.75996e-06	3.62051e-06	4.6276e-06	2.80731e-06	3.95968e-06	4.5988e-06	5.97061e-06	2.62118e-06	6.22265e-06	3.94964e-06	4.09765e-06	3.02913e-06	3.3759e-06
Celerinatantimonas	5.32938e-07	3.84782e-07	0	0	4.61796e-07	5.92629e-07	1.11392e-07	3.72846e-07	0	0	3.58886e-07	0	1.70831e-07	9.70262e-08	0	1.77947e-07	1.21743e-07	0	9.33433e-08	1.72906e-07	0	0	3.20158e-07	1.20007e-07
Cellulomonas	0.000122784	0.000126176	0.000160895	0.000138175	0.000188721	0.000178362	0.000193786	0.000191749	0.000129491	0.000156865	0.000156747	0.000127519	0.000139168	0.00016564	0.000133464	0.000152351	0.000134633	0.000146232	0.000137978	0.000133401	0.000158916	0.000112432	0.000157027	0.000156332
Cellulophaga	5.15946e-06	7.13601e-06	7.67132e-06	7.26407e-06	5.4608e-06	7.93412e-06	5.88274e-06	6.34167e-06	6.79521e-06	1.08977e-05	6.21998e-06	7.05955e-06	8.13405e-06	7.80088e-06	1.05868e-05	7.21001e-06	8.5284e-06	9.1768e-06	9.18196e-06	8.21141e-06	1.2659e-05	6.36524e-06	5.77286e-06	8.85649e-06
Cellulosilyticum	7.64987e-07	5.76327e-07	9.43827e-08	5.05831e-07	6.07823e-07	1.17029e-06	6.96556e-07	2.54139e-07	3.51684e-06	1.1275e-06	1.14871e-06	1.56104e-06	2.38261e-07	1.19793e-06	4.49064e-07	1.05197e-06	6.212e-07	2.89513e-07	0	2.61521e-07	1.93802e-06	1.04434e-07	1.07087e-06	5.74219e-07
Cellulosimicrobium	7.75806e-06	8.44558e-06	6.95584e-06	8.62709e-06	1.21523e-05	1.40419e-05	1.62979e-05	1.25242e-05	1.44234e-05	1.37094e-05	1.36663e-05	1.25288e-05	8.67486e-06	9.17175e-06	1.17582e-05	1.30896e-05	1.00586e-05	1.25337e-05	7.70398e-06	1.32189e-05	1.01682e-05	8.80465e-06	1.07479e-05	1.17216e-05
Cellvibrio	3.63324e-05	3.70958e-05	4.73361e-05	4.8744e-05	3.52813e-05	3.19888e-05	4.65863e-05	4.09413e-05	4.34255e-05	4.04058e-05	4.56725e-05	3.69083e-05	3.99357e-05	3.6357e-05	4.00346e-05	3.83909e-05	5.31905e-05	5.80776e-05	3.87519e-05	4.48401e-05	3.54845e-05	2.56216e-05	3.45542e-05	3.64054e-05
Cenarchaeum	1.04874e-06	1.38224e-06	2.21598e-06	2.02127e-06	9.54629e-07	1.3446e-06	1.17951e-06	1.44669e-06	1.28134e-06	1.8983e-06	4.83481e-07	2.19335e-06	1.72788e-06	1.77239e-06	8.52659e-07	1.00836e-06	1.67711e-07	2.78962e-07	1.03715e-06	1.1515e-06	9.96165e-07	6.35723e-07	3.97376e-07	3.51745e-07
Cenococcum	7.16469e-07	1.14414e-06	5.39957e-07	5.76048e-07	9.64172e-07	1.54365e-06	1.97102e-06	4.52468e-07	8.04568e-07	8.39691e-07	2.05544e-07	8.15616e-07	1.48063e-06	1.16294e-06	1.44086e-06	3.82127e-07	4.63816e-07	6.8992e-07	1.00449e-06	8.59283e-07	1.71243e-06	9.48712e-07	9.05599e-07	1.69472e-06
Centipeda	2.13402e-07	4.39405e-07	0	5.54226e-08	0	1.33837e-07	3.79114e-07	1.04517e-07	0	0	0	4.03224e-08	0	0	0	3.60287e-07	0	0	0	0	0	0	0	0
Cephaloticoccus	8.38491e-06	8.07118e-06	9.70285e-06	6.57089e-06	7.57524e-06	8.71287e-06	6.13461e-06	9.98123e-06	9.10642e-06	7.76693e-06	6.1198e-06	9.9711e-06	1.47959e-05	8.60666e-06	8.6845e-06	1.08762e-05	8.83398e-06	1.07618e-05	5.41661e-06	1.05292e-05	5.87474e-06	5.61845e-06	5.52832e-06	8.73009e-06
Ceraceosorus	2.30005e-07	6.22739e-07	9.20799e-07	2.4079e-07	6.04718e-07	1.13174e-06	3.60834e-07	7.27017e-07	7.07972e-07	9.00442e-07	2.41366e-07	1.86523e-06	9.63089e-07	4.21579e-06	6.4283e-07	1.22897e-06	2.1479e-06	1.69015e-06	1.85969e-06	3.47112e-06	2.75455e-07	5.45881e-06	2.40792e-06	9.26957e-07
Cerasibacillus	8.99773e-07	4.33766e-07	6.38631e-07	1.64915e-07	5.25872e-07	5.14844e-08	7.24718e-07	1.24011e-07	7.63612e-07	1.30681e-06	5.41886e-07	3.31436e-07	8.75511e-08	4.74084e-07	4.81556e-07	1.92828e-07	2.8929e-07	8.57321e-07	5.35373e-07	7.10777e-07	4.30264e-07	8.46928e-07	4.25138e-07	2.26816e-07
Ceratobasidium	1.07903e-07	6.81298e-07	0	6.11359e-07	3.49163e-07	0	0	3.58238e-07	6.08237e-07	1.236e-06	7.46198e-08	6.6919e-07	7.2483e-07	7.41811e-07	3.13395e-07	6.95284e-07	3.78178e-07	5.60815e-07	5.21631e-07	1.59654e-06	1.51044e-06	2.93576e-06	2.82817e-06	3.22166e-07
Ceratocystis	0	0	3.72812e-07	0	0	0	0	4.22686e-07	3.29963e-07	5.56697e-07	7.92811e-07	6.54384e-07	3.04656e-07	3.73044e-07	0	3.12678e-07	1.39135e-07	0	0	0	0	0	2.47303e-07	1.37151e-07
Cercospora	3.97281e-07	5.94433e-07	2.06104e-06	3.19219e-07	7.73342e-08	1.01552e-07	0	2.49975e-07	7.68992e-07	1.0567e-06	8.56432e-08	9.17865e-08	2.38776e-07	4.36575e-07	0	2.48721e-07	1.22469e-06	2.56445e-07	5.44119e-07	6.25282e-07	1.00282e-07	1.88201e-06	2.27779e-07	8.45399e-07
Cereibacter	2.20144e-06	1.1051e-06	2.13406e-06	2.32641e-06	1.87982e-06	2.46609e-06	1.51234e-06	1.57786e-06	1.28643e-06	1.09295e-06	1.01857e-06	9.74288e-07	2.50734e-06	1.35264e-06	1.20986e-06	1.74022e-06	1.8004e-06	2.02824e-06	4.23487e-07	1.3885e-06	1.86916e-06	8.0803e-07	1.33615e-06	1.83724e-06
Cesiribacter	7.50109e-06	6.17251e-06	8.21496e-06	6.83759e-06	4.98687e-06	9.78554e-06	6.37866e-06	4.2262e-06	9.06615e-06	6.63288e-06	8.36282e-06	7.87329e-06	9.52925e-06	6.34267e-06	1.12105e-05	9.93717e-06	8.60318e-06	9.5575e-06	1.09162e-05	6.72609e-06	9.24032e-06	6.36963e-06	7.89305e-06	1.00594e-05
Cetia	0	0	0	4.00959e-07	4.64005e-07	0	9.74676e-08	1.70515e-07	0	0	0	0	3.50205e-07	0	0	1.82395e-07	0	0	0	0	0	0	0	0
Cetobacterium	1.96427e-07	4.83928e-08	4.57438e-08	9.74694e-08	0	0	1.06814e-07	9.20573e-08	9.44678e-08	9.56289e-08	0	5.33023e-07	8.59398e-08	6.53679e-07	7.9073e-07	1.34279e-07	5.93418e-07	6.92244e-08	4.15043e-07	8.78568e-07	9.0666e-07	6.38419e-07	7.92119e-07	1.56864e-07
Cetovirus	0	0	0	0	0	0	8.76114e-08	0	1.96495e-07	8.19751e-07	2.11702e-07	1.38844e-07	3.39524e-07	0	0	1.04226e-07	3.47836e-07	0	0	4.48321e-07	3.15172e-07	2.81672e-07	6.18258e-08	0
Cetraspora	0	3.33001e-07	0	0	5.44433e-08	0	8.1904e-08	1.36789e-07	3.9587e-07	0	7.31709e-08	0	1.51625e-07	1.34859e-07	0	1.75099e-07	0	0	2.19312e-07	5.07807e-07	2.11796e-07	8.11135e-08	3.2135e-07	1.52226e-07
Chachezhania	1.90004e-07	1.99729e-07	1.11287e-07	4.02215e-07	2.95887e-07	2.11451e-07	5.20403e-07	3.08329e-07	9.22694e-07	1.1116e-06	1.49254e-06	1.0132e-06	6.27209e-07	5.2586e-07	4.04593e-07	4.70919e-07	9.89468e-07	0	8.59368e-07	2.61521e-07	1.91844e-07	2.0526e-07	4.00818e-07	3.31791e-07
Chaetomium	2.12792e-07	2.85026e-07	3.37094e-07	5.19347e-07	1.00307e-06	2.947e-07	5.63936e-06	5.51991e-07	9.16183e-07	4.56379e-07	2.04578e-06	0	6.23314e-07	8.62055e-07	0	6.51094e-07	7.33937e-07	1.10597e-06	8.8708e-07	2.19858e-07	4.89903e-07	0	2.27779e-07	8.73805e-07
Chakrabartia	5.25526e-06	3.953e-06	3.37976e-06	4.25225e-06	3.0283e-06	3.53816e-06	4.81595e-06	4.49946e-06	6.83021e-06	4.56841e-06	6.56368e-06	3.00075e-06	6.88857e-06	3.41978e-06	4.94381e-06	4.70814e-06	5.51013e-06	5.02387e-06	9.02214e-06	5.98202e-06	5.28943e-06	3.49475e-06	3.58666e-06	4.59186e-06
Chakrabartyvirus	0	4.04514e-07	0	0	0	0	0	0	0	0	0	0	1.01214e-06	5.90594e-08	9.9813e-08	1.01331e-07	0	0	0	0	0	0	0	0
Chalara	1.20328e-06	3.59248e-07	9.06058e-07	2.81837e-06	3.3607e-07	1.07658e-06	3.64213e-07	1.49464e-07	7.54799e-07	5.41728e-07	2.05218e-06	1.35481e-06	9.42372e-07	6.95605e-07	1.50436e-06	7.83048e-07	4.36449e-07	1.4283e-07	1.20155e-07	3.7497e-07	7.67376e-08	4.38203e-07	1.12685e-06	5.10403e-07
Chamaesiphon	2.39377e-05	2.65991e-05	2.44874e-05	2.36221e-05	2.11067e-05	2.06703e-05	2.81848e-05	1.87001e-05	2.06417e-05	2.39554e-05	2.40758e-05	2.59002e-05	2.42425e-05	2.08335e-05	2.67962e-05	2.44715e-05	1.58225e-05	1.68162e-05	1.55447e-05	1.17745e-05	2.3816e-05	1.47003e-05	1.638e-05	1.9237e-05
Changchengzhania	1.38836e-06	1.59942e-07	1.29547e-06	1.71869e-06	8.03446e-07	1.48492e-06	1.3624e-06	1.18564e-06	4.05494e-07	8.86834e-07	0	6.34159e-07	8.34186e-07	5.39689e-07	1.62037e-07	5.57037e-07	8.25076e-07	1.6089e-06	1.79952e-07	8.32182e-07	3.25283e-06	1.40906e-06	1.18183e-06	1.53436e-06
Chania	2.8704e-07	8.56851e-07	6.89196e-07	7.07726e-07	5.31459e-07	1.22453e-06	7.24057e-07	9.937e-07	9.62391e-08	2.32582e-07	7.11e-08	2.68006e-07	5.29915e-07	5.70312e-07	3.88201e-07	4.40752e-07	3.5741e-07	5.39449e-07	4.80105e-07	4.18433e-07	9.74169e-07	8.66996e-07	8.16568e-08	4.44171e-07
Charlievirus	0	0	0	0	6.45769e-07	0	1.13831e-07	0	0	0	0	0	0	0	0	0	0	0	0	0	0	0	0	0
Chelativorans	4.70904e-05	3.92378e-05	4.43261e-05	4.23004e-05	3.83026e-05	3.7056e-05	4.2688e-05	3.84398e-05	5.50163e-05	4.76329e-05	5.47815e-05	4.66994e-05	4.96925e-05	4.01881e-05	4.49626e-05	4.65714e-05	6.63694e-05	7.29475e-05	6.40798e-05	5.69016e-05	4.50114e-05	3.81775e-05	4.34201e-05	5.52935e-05
Chelatococcus	6.76395e-05	7.23455e-05	7.22989e-05	7.74383e-05	6.4705e-05	5.39728e-05	5.98127e-05	5.69054e-05	7.24648e-05	6.48993e-05	7.94973e-05	6.34704e-05	7.47175e-05	5.91368e-05	6.04365e-05	6.08644e-05	8.60376e-05	9.05913e-05	8.74488e-05	8.18666e-05	6.45268e-05	6.47126e-05	7.27685e-05	8.63404e-05
Chengkuizengella	1.80333e-06	2.77383e-06	1.30103e-06	2.65064e-06	2.63856e-06	1.20648e-06	1.64374e-06	2.0089e-06	7.13719e-07	2.11193e-06	1.9936e-06	1.63244e-06	2.38021e-06	3.14992e-06	1.05446e-06	1.5654e-06	9.29e-07	9.20653e-07	3.08014e-07	5.98647e-07	9.41055e-07	1.44842e-06	1.3646e-06	2.57054e-06
Chenonavirus	0	2.39031e-07	3.58464e-07	0	0	0	0	0	7.7769e-08	0	0	4.06356e-07	9.18692e-08	2.48568e-07	4.24271e-07	3.04851e-07	1.41791e-07	0	0	1.05665e-07	8.91396e-08	2.46618e-07	4.20176e-07	1.75793e-07
Cheoctovirus	3.90767e-07	2.24311e-06	5.98477e-07	5.82554e-07	9.94369e-07	1.1323e-06	3.12006e-07	1.22218e-06	3.791e-06	3.22413e-06	2.53622e-06	3.37398e-06	3.84446e-06	1.42169e-06	1.74476e-06	2.27412e-06	5.12624e-07	1.10342e-06	7.44766e-07	1.39903e-06	1.42159e-06	1.25596e-06	1.45052e-06	1.43257e-06
Chiangmaivirus	0	0	0	3.13569e-07	0	0	0	0	0	0	0	0	1.41283e-06	0	1.28612e-06	1.9459e-07	0	0	0	0	0	0	3.76331e-07	0
Chiayiivirga	2.8504e-05	2.66829e-05	3.43077e-05	2.91658e-05	2.74077e-05	3.21045e-05	2.89137e-05	2.70266e-05	3.34434e-05	2.84333e-05	2.60973e-05	3.01311e-05	2.95338e-05	2.45768e-05	2.94876e-05	3.60188e-05	2.96317e-05	4.11395e-05	3.68575e-05	3.07877e-05	2.9742e-05	2.417e-05	2.18896e-05	3.21877e-05
Chimaeribacter	9.5791e-07	5.38754e-07	9.66751e-07	6.0727e-07	5.43178e-07	5.71572e-07	1.03972e-06	1.31372e-06	8.85194e-07	1.2612e-06	3.68572e-07	8.58088e-07	1.7781e-06	1.81065e-06	1.41879e-06	1.81042e-06	9.28991e-07	4.72639e-07	4.40047e-07	2.09636e-06	3.57892e-07	8.84885e-07	7.23878e-07	9.56341e-07
Chishuiella	4.04638e-08	1.92588e-07	6.92043e-07	4.68502e-07	0	3.57313e-08	1.19482e-06	0	0	2.22679e-07	4.30663e-07	0	2.32543e-07	8.18293e-08	2.69495e-07	8.79013e-08	3.41605e-07	9.93024e-07	7.64906e-07	1.4944e-07	1.02614e-07	1.75888e-07	3.0194e-07	3.7536e-07
Chitinibacter	4.89699e-06	7.17882e-06	8.14625e-06	6.67862e-06	8.44039e-06	6.9446e-06	6.81746e-06	6.72403e-06	6.7925e-06	4.11444e-06	7.84115e-06	6.91548e-06	7.07889e-06	4.34692e-06	6.47896e-06	7.59382e-06	4.72411e-06	6.71542e-06	5.58913e-06	4.13049e-06	4.66704e-06	5.19851e-06	7.20736e-06	4.79497e-06
Chitinilyticum	1.12378e-05	1.08569e-05	9.3107e-06	1.18054e-05	1.05273e-05	9.015e-06	9.09894e-06	8.46988e-06	1.129e-05	8.17363e-06	8.82492e-06	7.76918e-06	7.35078e-06	7.42596e-06	9.74323e-06	8.3352e-06	6.50945e-06	9.10633e-06	8.55931e-06	6.75426e-06	5.65093e-06	5.16967e-06	6.92982e-06	8.00903e-06
Chitinimonas	7.14606e-05	6.36477e-05	7.82616e-05	6.75076e-05	6.42005e-05	6.2277e-05	6.61765e-05	7.00448e-05	6.03809e-05	5.34673e-05	6.06037e-05	5.96595e-05	6.24402e-05	4.87568e-05	5.55251e-05	5.61211e-05	6.41294e-05	8.56761e-05	0.000103994	7.13828e-05	6.02564e-05	5.25809e-05	6.24725e-05	6.86637e-05
Chitiniphilus	1.0664e-05	1.33486e-05	1.34608e-05	1.43635e-05	1.23043e-05	1.1202e-05	1.16501e-05	1.12981e-05	1.55804e-05	8.0179e-06	1.31153e-05	1.57458e-05	1.14359e-05	1.04525e-05	1.05271e-05	1.33715e-05	1.71413e-05	1.4709e-05	1.45303e-05	1.49649e-05	1.39812e-05	1.16619e-05	1.54141e-05	1.86429e-05
Chitinispirillum	3.10642e-06	3.56181e-06	1.57983e-06	2.8633e-06	4.39314e-06	3.84487e-06	2.42684e-06	2.80122e-06	2.40993e-06	2.58888e-06	2.06784e-06	2.93135e-06	3.13949e-06	2.97411e-06	2.40799e-06	3.16244e-06	1.36577e-06	8.43225e-07	2.07631e-06	1.67815e-06	9.91573e-07	9.08547e-07	2.39761e-06	1.18108e-06
Chitinivibrio	0	1.82382e-07	4.4463e-07	3.30981e-07	0	0	4.8308e-07	2.1684e-07	0	2.54144e-07	3.05538e-07	6.59871e-07	6.73042e-07	1.05701e-06	0	3.83714e-07	3.62411e-07	0	3.98163e-07	1.53836e-07	5.10105e-08	9.6586e-08	6.60283e-07	0
Chitinivorax	3.40394e-05	2.95033e-05	3.88924e-05	3.1944e-05	2.91901e-05	2.95266e-05	3.02122e-05	2.82876e-05	3.02571e-05	2.54498e-05	3.46467e-05	2.70396e-05	2.95387e-05	2.42749e-05	2.88204e-05	2.88508e-05	3.79877e-05	3.88719e-05	3.48598e-05	3.29995e-05	3.06132e-05	2.91284e-05	2.81852e-05	3.9986e-05
Chitinolyticbacter	1.05524e-05	1.02869e-05	1.42294e-05	1.07958e-05	9.22847e-06	8.11303e-06	1.15826e-05	1.25053e-05	9.19695e-06	1.09765e-05	1.15342e-05	8.87598e-06	9.43075e-06	9.01647e-06	1.00772e-05	9.06949e-06	1.03807e-05	1.28397e-05	1.08893e-05	1.3066e-05	1.15766e-05	1.01652e-05	1.00836e-05	1.08134e-05
Chitinophaga	0.000625289	0.000804009	0.000926457	0.000773241	0.000828335	0.00083014	0.000718505	0.000788376	0.000784785	0.000697378	0.000701892	0.00075084	0.00081114	0.000738353	0.000735021	0.000784456	0.000814849	0.000766082	0.000746891	0.000736473	0.00106226	0.000571709	0.000629292	0.000766474
Chlamydia	9.98895e-06	9.3271e-06	4.27106e-06	4.5265e-06	8.95473e-06	1.01306e-05	8.05876e-06	9.24707e-06	8.02049e-06	6.66821e-06	5.97635e-06	4.68787e-06	8.8392e-06	9.67025e-06	6.49107e-06	9.67489e-06	9.08271e-06	9.78749e-06	2.99612e-06	4.12796e-06	1.17026e-05	7.76522e-06	7.49586e-06	9.75811e-06
Chloracidobacterium	0.000121168	0.000102524	0.000125367	0.000108309	9.35933e-05	0.000103781	0.000106686	8.50534e-05	0.000112259	0.000119081	0.000132811	0.000123997	0.000111758	0.000101073	0.000132628	0.000119711	9.83565e-05	9.02382e-05	9.67401e-05	9.75979e-05	0.000127838	0.000106328	0.000120751	0.000134711
Chloriridovirus	0	0	0	0	0	0	0	0	0	2.88657e-07	0	0	0	0	0	0	0	0	0	0	0	0	0	0
Chlorobaculum	1.51664e-05	1.23181e-05	1.69167e-05	1.5597e-05	1.23802e-05	1.59808e-05	1.54415e-05	1.69e-05	1.36105e-05	1.56667e-05	1.44823e-05	1.32931e-05	1.37234e-05	1.09342e-05	1.51768e-05	1.42455e-05	1.73115e-05	1.47184e-05	1.46177e-05	1.05745e-05	1.62666e-05	1.39453e-05	1.79805e-05	1.92823e-05
Chlorobium	3.05789e-05	3.60103e-05	3.77121e-05	3.25284e-05	3.4871e-05	3.18248e-05	3.71858e-05	3.11734e-05	2.78474e-05	3.19138e-05	3.41294e-05	3.06753e-05	2.78271e-05	2.47529e-05	3.17545e-05	3.00568e-05	2.89214e-05	2.17729e-05	3.01018e-05	2.39829e-05	3.17422e-05	2.55244e-05	2.22761e-05	2.16531e-05
Chlorociboria	6.11201e-08	5.5161e-08	3.84626e-07	0	0	3.93843e-07	0	5.36068e-07	8.84957e-08	3.23252e-07	0	1.81295e-07	3.85219e-07	0	4.27071e-07	7.94864e-07	6.61189e-07	0	0	1.20239e-07	1.83851e-07	6.51735e-07	9.01627e-08	9.51644e-07
Chloroflexus	6.92965e-05	8.14786e-05	6.75949e-05	7.75092e-05	7.37701e-05	6.8604e-05	6.97607e-05	6.48988e-05	7.30423e-05	7.00359e-05	7.75098e-05	7.05403e-05	8.06474e-05	7.24663e-05	8.39641e-05	7.92079e-05	5.8633e-05	6.90222e-05	5.74353e-05	5.08484e-05	6.62987e-05	5.19772e-05	5.77219e-05	6.09209e-05
Chlorogloea	4.58681e-06	4.30431e-06	5.71279e-06	4.65513e-06	5.12545e-06	5.53027e-06	4.88319e-06	6.06091e-06	5.81573e-06	4.54398e-06	6.09224e-06	4.87014e-06	4.98701e-06	6.09157e-06	5.02221e-06	6.07241e-06	5.19477e-06	4.77115e-06	6.36102e-06	4.05964e-06	5.40404e-06	3.61773e-06	6.16726e-06	4.46192e-06
Chlorogloeopsis	2.85581e-05	2.60929e-05	2.2723e-05	2.75561e-05	2.72471e-05	2.33875e-05	3.07386e-05	2.28569e-05	2.02929e-05	2.59845e-05	2.2823e-05	2.18489e-05	2.54039e-05	2.36693e-05	2.69345e-05	2.41245e-05	1.76179e-05	2.00187e-05	1.67742e-05	2.05994e-05	2.31036e-05	1.91213e-05	1.96396e-05	2.54644e-05
Chloroherpeton	2.32721e-06	2.94916e-06	2.83341e-06	3.313e-06	2.48365e-06	2.78742e-06	2.72172e-06	4.65967e-06	2.2094e-06	3.1572e-06	3.90072e-06	2.37254e-06	2.23723e-06	2.69414e-06	2.45521e-06	2.34667e-06	2.34146e-06	3.3735e-06	1.37899e-06	1.60359e-06	1.52089e-06	1.47234e-06	2.28245e-06	1.5976e-06
Chlorovirus	0	9.93492e-07	0	7.76207e-07	8.61444e-08	0	0	4.94681e-07	1.63811e-07	3.16508e-07	0	4.34836e-07	7.86977e-08	2.95297e-07	8.07476e-08	1.63951e-07	0	1.96236e-07	1.96427e-07	0	0	7.26495e-08	0	0
Choanephora	0	1.6783e-07	0	0	1.49681e-06	4.41172e-07	0	8.44565e-07	3.99228e-07	1.55227e-06	3.6287e-07	8.68944e-07	1.37602e-06	3.48425e-06	6.60482e-07	3.72445e-07	1.19152e-06	6.56509e-07	1.90538e-06	1.83017e-06	1.46514e-06	4.96508e-06	2.35663e-06	8.94169e-07
Choiromyces	2.94288e-07	4.04514e-08	4.30671e-07	4.88846e-07	1.47136e-07	4.71207e-07	1.1996e-07	3.84752e-08	7.93725e-08	4.46181e-07	2.89869e-07	7.66569e-08	1.84592e-07	4.87782e-07	2.56225e-07	1.22564e-07	7.20034e-07	1.0148e-06	1.48612e-07	9.36568e-07	0	7.65846e-07	0	9.89747e-08
Chondrocystis	1.19681e-06	1.73e-06	1.40968e-06	1.48647e-06	1.99873e-06	1.42607e-06	2.52461e-06	1.39425e-06	1.7101e-06	3.32068e-06	2.23008e-06	2.1569e-06	1.49406e-06	2.48715e-06	1.75123e-06	1.87226e-06	1.17774e-06	1.37277e-06	1.97614e-06	3.86417e-06	2.99053e-06	4.73019e-06	4.33262e-06	3.02258e-06
Chondromyces	0.000250077	0.00042633	0.000304105	0.000341948	0.000334183	0.000369556	0.00038081	0.000342276	0.000282028	0.000271843	0.000262447	0.0002749	0.00032981	0.000299867	0.000328408	0.000342649	0.000203975	0.000260568	0.00017551	0.000190002	0.000194143	0.000114266	0.000216078	0.000171651
Christensenella	1.34123e-06	5.24174e-07	9.73701e-07	1.31089e-06	6.60835e-07	1.92427e-06	2.14096e-06	8.20439e-07	3.47044e-07	8.54951e-08	4.33239e-07	4.86797e-07	3.89152e-07	1.69796e-07	6.45561e-07	7.49327e-07	3.84582e-07	6.44552e-07	1.33246e-06	8.06916e-07	0	1.04434e-07	6.78263e-07	4.62677e-07
Chromatium	3.37384e-06	1.39662e-06	9.09605e-07	3.27636e-06	2.18774e-06	2.02151e-06	1.87215e-06	2.77839e-06	9.34671e-07	1.67756e-06	3.489e-06	2.53022e-06	2.31708e-06	1.96645e-06	1.79548e-06	2.03032e-06	3.23193e-06	1.4553e-06	2.91004e-06	3.43919e-06	1.22908e-06	2.32431e-06	1.33863e-06	2.91466e-06
Chromatocurvus	1.48518e-06	1.67201e-06	2.40761e-06	3.18015e-06	2.53277e-06	3.73471e-06	2.86075e-06	2.94041e-06	3.25851e-06	2.97078e-06	3.95463e-06	3.00466e-06	3.02412e-06	3.60292e-06	2.57743e-06	2.71922e-06	1.93088e-06	2.36137e-06	1.78953e-06	2.81306e-06	1.75586e-06	7.57336e-07	1.82256e-06	3.61731e-06
Chromobacterium	5.02758e-05	4.8865e-05	5.70445e-05	5.29686e-05	5.88774e-05	4.9199e-05	5.06363e-05	5.41194e-05	5.60488e-05	4.50167e-05	4.79175e-05	4.66898e-05	5.03953e-05	3.96792e-05	4.79316e-05	5.0651e-05	5.39733e-05	6.50426e-05	7.72547e-05	6.05416e-05	4.31267e-05	3.4101e-05	4.26775e-05	4.8067e-05
Chromohalobacter	2.96709e-06	5.3009e-06	2.97003e-06	4.36026e-06	1.96362e-06	3.46161e-06	2.50412e-06	4.06173e-06	2.35696e-06	2.5749e-06	1.30143e-06	2.81031e-06	2.32501e-06	3.61955e-06	3.28254e-06	2.94806e-06	3.78326e-06	2.98986e-06	1.06e-06	1.68876e-06	2.73159e-06	2.69017e-06	4.4877e-06	2.83581e-06
Chroococcidiopsis	4.28331e-05	3.73063e-05	4.37044e-05	4.7934e-05	4.84705e-05	4.6986e-05	4.95061e-05	4.31232e-05	4.86969e-05	4.42431e-05	5.3478e-05	5.08668e-05	4.38357e-05	3.83993e-05	5.2298e-05	4.22001e-05	4.09538e-05	3.74931e-05	4.24702e-05	4.62415e-05	4.9377e-05	3.92872e-05	4.75789e-05	5.23424e-05
Chroococcus	0	0	0	0	0	0	0	0	3.39667e-07	0	0	0	0	0	0	0	0	0	0	0	0	0	0	0
Chroogloeocystis	5.36509e-06	3.9915e-06	4.40008e-06	3.56649e-06	3.52841e-06	2.81391e-06	3.22119e-06	6.15727e-06	3.02894e-06	2.42592e-06	4.1106e-06	3.63186e-06	4.36554e-06	4.89371e-06	4.50323e-06	4.25291e-06	2.70655e-06	3.46558e-06	3.41324e-06	4.48236e-06	3.10777e-06	2.85069e-06	4.13937e-06	5.80867e-06
Chryseobacterium	7.79442e-05	8.56915e-05	9.79383e-05	8.52351e-05	8.35033e-05	9.66709e-05	0.00336633	7.64702e-05	8.75073e-05	8.73036e-05	9.05791e-05	8.68874e-05	8.48813e-05	8.34593e-05	0.000101922	8.55189e-05	0.000116238	0.000124514	0.000107208	9.39561e-05	0.000158006	8.57599e-05	8.39653e-05	9.1925e-05
Chryseoglobus	2.02183e-07	1.33825e-06	5.77805e-07	8.04213e-07	7.70765e-07	1.53147e-06	2.13628e-07	5.44335e-07	9.22797e-07	1.59449e-06	9.38237e-07	1.37865e-06	1.74663e-06	1.89505e-06	9.44557e-07	6.19314e-07	2.55536e-06	1.76954e-06	1.81716e-06	3.08228e-06	2.08397e-06	7.87669e-07	1.12855e-06	1.45969e-06
Chryseolinea	0.000130309	0.000203785	0.000307402	0.000160632	0.000166121	0.000137007	0.000586892	0.000157682	0.00024828	0.000385704	0.000220994	0.000227946	0.000213037	0.000191971	0.000171208	0.000199584	0.000210244	0.000239114	0.000337903	0.000240752	0.000188918	0.000140514	0.00015607	0.000149366
Chryseomicrobium	1.79839e-07	9.73831e-08	6.13682e-08	1.30761e-07	2.80058e-08	1.67619e-07	3.88667e-07	3.08752e-08	0	1.46125e-07	7.01245e-08	2.00948e-07	2.30587e-07	6.0847e-08	6.52851e-07	1.20096e-07	0	0	0	4.30487e-08	0	0	0	7.90168e-08
Chryseotalea	7.39573e-06	2.21856e-05	2.97275e-05	1.81716e-05	1.49683e-05	1.29447e-05	4.16926e-05	1.09319e-05	2.7697e-05	4.84973e-05	2.31367e-05	2.36905e-05	2.08494e-05	1.85211e-05	2.03079e-05	2.06312e-05	1.33888e-05	1.61369e-05	2.16122e-05	1.52632e-05	1.34092e-05	8.23457e-06	1.10349e-05	9.44682e-06
Chrysiogenes	1.92318e-06	3.09009e-06	1.73325e-06	2.34801e-06	2.09611e-06	2.23961e-06	3.15755e-06	2.13115e-06	2.91383e-06	1.42261e-06	1.65346e-06	1.22559e-06	1.4823e-06	1.65138e-06	2.76084e-06	1.29908e-06	1.27502e-06	2.14697e-06	1.14201e-06	1.42067e-06	7.67628e-07	1.15324e-06	5.46809e-07	1.53563e-06
Chrysoporthe	1.09252e-07	0	0	3.45381e-07	8.74101e-07	2.96845e-07	0	3.26203e-07	0	0	2.73423e-07	0	1.79592e-07	0	0	0	4.14443e-07	6.0019e-07	1.41182e-07	2.22571e-07	9.38811e-08	0	3.24586e-07	0
Chrysosporum	1.13729e-06	1.51505e-06	1.3184e-06	1.52842e-06	1.39971e-06	5.47833e-07	6.69964e-07	1.19427e-06	8.43427e-07	1.29957e-06	1.14988e-06	7.56587e-07	8.1778e-07	1.0843e-06	5.27209e-07	6.67995e-07	9.27378e-07	7.2815e-07	1.32993e-06	3.3997e-06	2.00149e-06	1.6642e-06	1.04142e-06	1.91963e-06
Chthoniobacter	0.000462284	0.00110176	0.000679801	0.000830978	0.0017757	0.00117717	0.00193891	0.00190642	0.000532911	0.000507056	0.000557837	0.000567783	0.000595228	0.000735422	0.000586138	0.000743151	0.00048248	0.000443224	0.000416113	0.000382579	0.000383282	0.000383095	0.000410206	0.000509284
Chthonobacter	1.5475e-05	1.13743e-05	1.57351e-05	2.07229e-05	1.06101e-05	1.0613e-05	1.41188e-05	1.4404e-05	1.25146e-05	1.24556e-05	1.67606e-05	1.51739e-05	1.4882e-05	1.14932e-05	1.34279e-05	1.31187e-05	2.6628e-05	2.44834e-05	1.93041e-05	1.48984e-05	1.3248e-05	9.37141e-06	1.18946e-05	1.41859e-05
Chthonomonas	9.3469e-05	0.000159318	0.000114908	0.000178779	0.000239221	0.000272105	0.000273947	0.000242786	0.000115056	0.000128372	0.000117904	0.000127329	9.7595e-05	9.54139e-05	0.000128625	0.000114796	7.20581e-05	6.04275e-05	6.28754e-05	5.57896e-05	0.000111379	7.37995e-05	7.63266e-05	9.49538e-05
Chunghsingvirus	1.16536e-07	5.91101e-07	4.97082e-08	1.67023e-07	1.04699e-07	1.57268e-07	2.31923e-07	2.15461e-07	0	0	5.79738e-08	0	5.38776e-08	0	0	0	0	0	0	0	0	0	0	0
Chytriomyces	8.89461e-07	8.51358e-07	1.39074e-06	2.20752e-07	1.40406e-06	6.85738e-07	5.12339e-07	3.22807e-07	5.29229e-07	2.34813e-06	1.8513e-06	2.80348e-06	1.4619e-06	5.22183e-06	8.41576e-07	1.67967e-06	2.01327e-06	4.09402e-06	2.33922e-06	3.75052e-06	1.27974e-06	5.7069e-06	4.79609e-06	1.12487e-06
Ciceribacter	3.83987e-06	4.15421e-06	3.0146e-06	3.63155e-06	4.74182e-06	3.55208e-06	3.5093e-06	4.0741e-06	2.9148e-06	3.04168e-06	2.71271e-06	3.08586e-06	2.75773e-06	4.23039e-06	1.78137e-06	4.80462e-06	4.40681e-06	5.35927e-06	4.30079e-06	3.49854e-06	2.77789e-06	3.78423e-06	3.08997e-06	4.83888e-06
Cimpunavirus	0	1.29312e-07	1.22233e-07	4.25772e-07	5.5782e-07	6.3262e-08	0	1.22995e-07	1.53019e-06	1.56151e-06	6.17542e-07	1.25644e-06	4.13119e-06	1.8775e-06	4.94692e-06	2.71061e-06	3.60719e-07	0	0	0	0	0	0	0
Cinunavirus	0	0	0	9.57079e-08	0	0	0	0	0	0	0	0	0	0	0	0	0	0	0	0	0	0	8.34276e-07	0
Citreicella	1.18901e-06	8.62822e-07	5.4148e-07	7.71389e-07	1.3046e-06	3.62159e-07	2.15189e-06	1.19505e-06	1.99296e-06	1.84259e-06	1.66524e-06	1.91363e-06	1.58576e-06	5.66411e-07	1.05839e-06	1.22437e-06	1.53293e-06	4.38141e-07	8.04941e-07	4.49661e-07	1.95656e-07	8.52689e-07	1.20876e-06	7.11635e-07
Citreimonas	1.08469e-06	1.61469e-06	5.68915e-07	1.33832e-06	1.5938e-06	1.02888e-06	1.71139e-06	1.87588e-06	4.19036e-07	1.09544e-06	1.4398e-06	1.82023e-06	1.02087e-06	1.76446e-06	2.07091e-06	1.8893e-06	7.08339e-07	2.66777e-06	1.68575e-07	2.49783e-06	1.49093e-06	8.93201e-07	1.60623e-06	1.01743e-06
Citricoccus	1.57295e-06	2.92084e-06	2.62168e-06	2.60765e-06	3.56092e-06	2.9119e-06	2.98328e-06	3.04623e-06	4.47491e-06	3.21838e-06	1.80324e-06	2.46273e-06	2.90097e-06	1.50378e-06	3.13902e-06	4.07711e-06	1.98169e-06	3.85855e-06	2.02153e-06	1.60091e-06	3.3305e-06	2.32851e-06	5.09955e-06	2.11933e-06
Citrobacter	0.000106688	0.000109126	0.000222508	7.80391e-05	7.21465e-05	9.23892e-05	7.44366e-05	6.07235e-05	0.000106822	0.000130684	0.000129504	0.000119696	0.000189362	0.000113185	0.00013685	0.000130788	0.000196728	0.000194272	0.000177696	0.000158589	0.000103666	0.000110977	9.38428e-05	0.000149146
Citromicrobium	1.8213e-05	1.37702e-05	1.55807e-05	2.04853e-05	2.19249e-05	1.92772e-05	2.05258e-05	2.0387e-05	2.83182e-05	2.39942e-05	2.23838e-05	2.09782e-05	1.8642e-05	1.94446e-05	2.17657e-05	1.71101e-05	2.92561e-05	2.9181e-05	2.96515e-05	2.76387e-05	2.11682e-05	1.88744e-05	2.15603e-05	2.27987e-05
Cladonia	6.06957e-08	1.09556e-07	0	0	0	0	0	0	5.34662e-08	0	5.23375e-08	4.84429e-08	0	0	0	0	0	1.56716e-07	2.35303e-07	4.35868e-07	0	0	2.40434e-07	0
Cladophialophora	2.36394e-07	0	0	0	0	0	3.24892e-07	2.84911e-07	1.71296e-07	1.03599e-06	4.91965e-07	6.29248e-07	2.80164e-07	1.23488e-07	9.45597e-08	3.65821e-07	1.7708e-07	4.0784e-07	6.95102e-07	4.0277e-07	1.8111e-07	8.42802e-07	2.10063e-07	3.5453e-07
Cladosporium	0	0	5.14223e-08	0	0	1.64212e-07	0	0	1.63811e-07	0	0	3.36762e-07	4.83041e-08	9.36805e-08	0	0	0	0	0	1.44287e-07	6.08609e-08	2.30474e-07	5.47406e-07	1.02133e-07
Clathrospora	0	0	0	0	0	0	5.46134e-07	0	0	0	0	7.39384e-07	0	0	9.84457e-08	0	0	4.63708e-07	1.41182e-07	0	0	0	0	0
Clavibacter	3.78497e-06	4.28639e-06	3.48176e-06	5.2094e-06	5.16191e-06	5.83595e-06	5.75406e-06	6.08746e-06	5.70191e-06	4.48567e-06	3.84011e-06	3.8629e-06	4.2377e-06	3.84399e-06	3.47732e-06	4.9948e-06	3.83915e-06	3.84524e-06	2.86325e-06	2.59713e-06	4.04426e-06	3.91832e-06	5.49395e-06	3.40933e-06
Claviceps	1.69165e-07	4.26055e-07	5.40789e-07	0	0	0	0	0	9.10628e-07	2.1556e-07	0	4.63552e-07	3.50205e-07	3.82719e-07	5.07285e-07	0	0	0	0	1.02486e-06	1.76496e-07	9.82905e-08	0	0
Clavispora	8.7559e-06	8.10127e-06	6.21184e-06	7.59754e-06	8.91483e-06	8.52772e-06	7.33049e-06	7.71764e-06	5.35124e-06	5.40626e-06	4.52103e-06	3.86839e-06	4.51027e-06	4.06091e-06	4.36226e-06	5.33491e-06	9.28321e-07	1.17875e-06	7.38874e-07	2.71588e-07	1.83851e-07	5.78165e-07	7.34356e-07	7.21416e-07
Cloacibacillus	8.84469e-07	3.23997e-07	6.72913e-07	4.51946e-07	1.28726e-06	1.02282e-06	9.30646e-07	8.35048e-07	3.72989e-07	6.14431e-07	7.53465e-07	6.72033e-07	4.62762e-07	9.11511e-07	1.05047e-06	9.86546e-07	6.76072e-07	2.17424e-06	1.35822e-06	6.35141e-07	2.4928e-06	1.06607e-06	1.34138e-06	1.71358e-06
Cloacibacterium	1.95963e-06	1.33941e-06	1.13488e-06	2.3309e-06	4.20316e-06	3.15791e-06	5.59759e-06	2.46305e-06	2.938e-06	1.9435e-06	1.65339e-06	3.67407e-06	3.44588e-06	1.88537e-06	2.56291e-06	3.63544e-06	2.40878e-06	2.72335e-06	1.91858e-06	1.48484e-06	2.16522e-06	3.17329e-06	1.24821e-06	1.70069e-06
Clohesyomyces	0	1.06595e-07	4.72724e-07	4.78552e-07	3.44017e-07	0	6.01247e-07	1.01387e-07	1.04042e-07	1.92438e-07	0	0	9.46499e-08	9.17816e-08	5.57514e-07	9.8592e-08	4.08592e-07	0	1.25048e-06	4.68395e-07	1.19254e-07	0	1.29188e-07	0
Clostridiisalibacter	0	0	3.10676e-07	0	0	0	3.29468e-07	0	0	1.08247e-07	1.06149e-07	2.90657e-07	0	0	2.76405e-07	3.05419e-07	0	0	0	0	0	0	2.4382e-07	0
Clostridioides	3.04431e-06	3.94439e-06	3.91131e-06	4.64598e-06	7.00948e-06	6.291e-06	4.3246e-06	2.70686e-06	3.29511e-06	3.11485e-06	2.89999e-06	4.3266e-06	3.80561e-06	2.86267e-06	3.02542e-06	4.14325e-06	4.45509e-06	8.0105e-06	4.16949e-06	3.5681e-06	2.8028e-06	3.45425e-06	4.04149e-06	3.46246e-06
Clostridium	7.93267e-05	8.5952e-05	8.49257e-05	8.96273e-05	7.82586e-05	8.40285e-05	8.61963e-05	7.9345e-05	8.63534e-05	9.43766e-05	8.86072e-05	8.17377e-05	9.55352e-05	9.43505e-05	9.42128e-05	9.44617e-05	6.913e-05	7.59526e-05	8.59913e-05	7.6275e-05	8.1495e-05	8.34388e-05	7.94384e-05	7.46972e-05
Cnuella	8.57168e-05	5.5578e-05	0.000116353	7.68024e-05	8.60535e-05	0.000101449	8.14675e-05	7.62595e-05	0.000109403	0.00011724	0.000123104	0.000119291	0.000119086	9.83703e-05	0.00012034	0.000102663	0.00013036	0.000107352	0.000119482	0.000100479	0.000107204	8.3031e-05	8.83705e-05	0.000116543
Cnuibacter	9.57229e-07	1.35185e-06	2.72275e-07	7.56383e-07	9.0958e-07	6.39364e-07	1.21092e-06	1.34559e-06	7.7769e-08	3.72851e-07	3.53251e-07	3.21686e-07	9.66473e-07	1.45406e-06	7.47199e-07	6.12001e-07	0	6.44776e-07	0	0	0	0	0	1.15752e-06
Cobetia	8.48914e-06	5.00921e-06	1.81012e-05	3.0126e-06	1.64766e-05	1.02597e-05	4.71645e-06	3.99865e-05	5.70589e-05	8.36198e-05	2.18711e-05	0.000103041	6.10494e-05	0.000193941	4.54678e-05	5.71014e-05	8.40309e-05	0.000106174	0.000129459	0.000211625	4.60188e-05	0.000316348	0.000209127	8.02219e-05
Coccidioides	1.09252e-07	1.97201e-07	6.52421e-07	4.88495e-07	8.50676e-08	0	5.56139e-07	9.37834e-08	4.28163e-07	3.34018e-07	1.0592e-06	5.33607e-07	5.84681e-07	2.41032e-07	3.59327e-07	3.64791e-07	8.52199e-07	0	7.0068e-07	7.84562e-07	1.1031e-07	6.09796e-07	2.1639e-07	0
Cochleicola	1.7882e-07	9.62966e-08	2.47447e-07	1.96142e-07	8.68306e-07	0	6.12367e-07	4.60869e-07	2.53731e-07	1.16805e-06	2.25265e-07	3.98383e-07	7.01846e-07	5.49144e-07	1.17593e-06	5.01365e-07	6.49294e-07	0	0	1.03573e-07	1.13139e-07	1.06532e-06	1.06859e-07	6.1542e-07
Cocleimonas	2.12295e-06	1.8443e-06	1.57096e-06	1.70652e-06	2.26269e-06	1.6131e-06	1.54958e-06	1.54121e-06	2.6242e-06	2.05578e-06	2.37203e-06	2.13334e-06	2.97734e-06	1.66109e-06	1.35051e-06	2.10934e-06	2.25864e-06	4.20253e-06	1.30957e-06	1.93474e-06	2.05896e-06	1.34297e-06	3.02101e-06	9.51044e-07
Coemansia	3.80008e-07	0	2.69436e-07	0	9.94227e-07	5.89157e-08	0	9.14752e-07	1.06279e-06	1.58183e-06	6.38695e-08	8.46524e-07	1.07557e-06	3.44593e-06	3.56149e-07	1.0067e-06	1.69531e-06	1.1545e-06	2.16344e-06	4.67924e-06	4.00226e-07	4.63849e-06	2.98334e-06	1.01002e-06
Cognatishimia	1.03095e-06	3.06496e-06	2.17458e-06	2.10894e-06	2.00613e-06	4.60668e-06	1.12171e-06	2.47247e-06	1.55675e-06	2.29579e-06	1.14663e-06	1.16111e-06	2.6785e-06	1.79562e-06	2.78883e-06	3.73972e-06	2.70121e-06	2.2828e-06	1.82889e-06	1.96959e-06	6.22807e-07	6.4724e-07	5.38114e-07	3.47671e-07
Cognatiyoonia	4.43401e-07	6.00422e-07	1.29553e-06	1.15716e-06	6.13939e-07	9.56201e-07	6.96864e-07	5.59638e-07	1.33655e-06	5.24535e-07	7.41224e-07	1.3169e-06	5.48481e-07	4.33426e-07	2.79246e-07	9.59975e-08	3.47836e-07	7.07053e-07	5.31273e-07	1.3076e-07	1.36228e-06	5.27665e-07	1.14356e-06	1.56442e-06
Cohaesibacter	4.44481e-06	4.97536e-06	6.75039e-06	6.02795e-06	3.72078e-06	5.16999e-06	5.90346e-06	2.2724e-06	3.07814e-06	5.6284e-06	8.62137e-06	5.95442e-06	5.65441e-06	5.75359e-06	3.53018e-06	5.18264e-06	6.7542e-06	9.65775e-06	5.90822e-06	6.28948e-06	4.33278e-06	3.31373e-06	4.36326e-06	1.05097e-05
Cohnella	4.97308e-05	5.68463e-05	6.33346e-05	6.24618e-05	5.2196e-05	5.69595e-05	6.18451e-05	5.81043e-05	5.45164e-05	6.24956e-05	6.36386e-05	5.77359e-05	6.36253e-05	5.13605e-05	6.01467e-05	5.8639e-05	6.84727e-05	6.80075e-05	7.21827e-05	6.24939e-05	5.90167e-05	5.07702e-05	5.51909e-05	5.90696e-05
Coleofasciculus	1.65158e-05	1.53576e-05	1.60373e-05	1.62683e-05	1.57465e-05	1.71425e-05	1.92626e-05	1.46504e-05	1.99181e-05	1.68712e-05	1.84542e-05	1.67767e-05	1.43985e-05	1.30695e-05	1.72252e-05	1.47373e-05	1.47584e-05	1.42439e-05	1.25545e-05	1.61347e-05	1.76898e-05	1.63769e-05	1.62771e-05	1.58107e-05
Coleophoma	3.17399e-07	7.19652e-07	1.76132e-07	6.28156e-07	1.04171e-07	1.21543e-07	5.44627e-07	3.72046e-07	2.30132e-07	6.13681e-08	1.81605e-07	5.86224e-07	1.66009e-07	1.01643e-06	5.65869e-08	5.74473e-08	0	6.6374e-07	0	1.53836e-07	0	1.00659e-07	2.86508e-07	1.01058e-07
Colidextribacter	0	5.4778e-07	0	0	0	0	2.16595e-07	9.28455e-08	8.36862e-08	3.07648e-07	0	3.79118e-07	0	5.98797e-07	9.9813e-08	1.01331e-07	0	0	0	2.27409e-07	0	0	0	0
Colletotrichum	3.0447e-06	2.07206e-06	4.61902e-06	3.33348e-06	3.69072e-06	3.39436e-06	5.93361e-06	5.61624e-06	6.90159e-06	8.61447e-06	1.70872e-05	8.44137e-06	9.33513e-06	1.46919e-05	5.01372e-06	6.59404e-06	6.61537e-06	1.3487e-05	1.14944e-05	1.67463e-05	5.73567e-06	2.19119e-05	1.69951e-05	6.66709e-06
Collimonas	8.97416e-05	9.99789e-05	0.000101364	9.83066e-05	9.43e-05	9.43689e-05	0.00010403	0.000104276	8.49252e-05	6.9163e-05	7.97683e-05	7.6776e-05	8.18692e-05	7.44895e-05	8.03308e-05	7.93674e-05	6.03912e-05	6.13711e-05	5.60207e-05	6.35435e-05	6.21891e-05	5.63755e-05	6.53995e-05	6.87434e-05
Collinsella	1.32212e-05	1.47255e-05	1.1734e-05	1.786e-05	1.32949e-05	1.40748e-05	1.35047e-05	1.35694e-05	1.26592e-05	1.45915e-05	1.6577e-05	1.41946e-05	1.35386e-05	1.0435e-05	1.06224e-05	1.06843e-05	1.51142e-05	1.5526e-05	2.16815e-05	1.8478e-05	1.38793e-05	1.44753e-05	1.38336e-05	1.53094e-05
Colossusvirus	8.31024e-07	2.32001e-07	5.48253e-08	0	1.50269e-07	2.48791e-07	5.73339e-08	0	1.13222e-07	1.50947e-07	1.10832e-07	0	1.49918e-07	1.4982e-07	3.15892e-07	0	5.19436e-07	0	0	0	2.59554e-07	0	1.73749e-07	2.36343e-07
Colwellia	9.10197e-06	1.44261e-05	1.33074e-05	1.1528e-05	1.22677e-05	1.72378e-05	1.84704e-05	1.61977e-05	1.4964e-05	1.27986e-05	1.30788e-05	1.09965e-05	1.36173e-05	1.42635e-05	1.06905e-05	1.30944e-05	1.14088e-05	1.62044e-05	1.42846e-05	1.33369e-05	1.24607e-05	1.01384e-05	1.43523e-05	1.14537e-05
Comamonas	0.000108038	0.000126909	0.000105298	9.44273e-05	8.54147e-05	8.72128e-05	8.26057e-05	0.000116065	0.000170604	7.64893e-05	8.59365e-05	7.62466e-05	7.20587e-05	6.35475e-05	6.88222e-05	7.34619e-05	8.06884e-05	9.44455e-05	8.02427e-05	8.08706e-05	8.24189e-05	7.18661e-05	7.86878e-05	8.92528e-05
Commensalibacter	1.41947e-06	2.1611e-07	4.95047e-07	4.04782e-07	7.01431e-07	3.14357e-07	4.43895e-07	9.77271e-07	4.74633e-07	2.13527e-07	1.47776e-07	1.93258e-07	5.40725e-07	2.37546e-07	0	5.28848e-07	1.34003e-06	3.57674e-07	6.18879e-07	4.61691e-07	5.79411e-07	6.58143e-07	5.63567e-07	1.10588e-06
Compostimonas	1.62328e-06	8.77352e-07	5.05718e-07	2.2388e-06	1.0258e-06	6.78675e-07	2.85723e-06	8.39088e-07	1.66119e-06	2.32378e-06	1.5165e-06	1.53104e-06	2.2691e-06	1.50346e-06	1.35476e-06	1.18891e-06	1.92745e-06	7.73977e-07	3.67497e-07	2.42492e-06	1.36565e-06	1.25119e-06	2.31699e-06	1.20837e-06
Conchiformibius	1.09252e-07	2.95801e-07	3.73763e-07	2.11833e-07	0	1.02906e-07	0	0	0	2.07833e-07	0	4.59941e-07	1.09432e-06	5.09388e-07	1.13174e-07	8.58742e-07	0	5.7132e-07	0	1.45289e-07	1.24293e-07	0	3.60651e-07	1.28007e-07
Conexibacter	0.000138933	0.000162897	0.000159958	0.000167935	0.00021537	0.000202772	0.000206297	0.000201214	0.000229824	0.000229958	0.000230385	0.000231888	0.000241023	0.000210187	0.000298697	0.000244408	0.000299673	0.000266575	0.000354731	0.000292734	0.000254993	0.000309744	0.000291209	0.000300954
Conexivisphaera	0	1.11099e-07	3.15052e-07	1.11884e-07	3.83403e-07	1.08704e-07	1.09823e-07	4.22686e-07	9.74573e-08	0	2.862e-07	0	0	0	0	0	1.23284e-07	0	0	0	3.48348e-07	0	0	2.43052e-07
Confluentibacter	6.78674e-06	4.89791e-06	6.27538e-06	6.39842e-06	4.33648e-06	5.7604e-06	6.35775e-06	4.96446e-06	7.51587e-06	7.0962e-06	6.24616e-06	6.18661e-06	7.85431e-06	6.82562e-06	7.93274e-06	7.64664e-06	1.38219e-05	1.10919e-05	9.22461e-06	8.92652e-06	9.15276e-06	4.79074e-06	7.02238e-06	1.12924e-05
Confluentimicrobium	1.28538e-06	9.52844e-07	2.15803e-06	2.76494e-06	1.12696e-06	1.59082e-06	3.01145e-06	2.34842e-06	2.92479e-06	2.28805e-06	3.09967e-06	2.01726e-06	8.1737e-07	7.09694e-07	2.3863e-06	2.85475e-06	4.15613e-06	3.64382e-06	2.7902e-06	1.94303e-06	1.89933e-06	1.64344e-06	2.60042e-06	2.24085e-06
Congregibacter	3.16756e-06	2.65229e-06	3.60424e-06	3.21566e-06	4.14782e-06	2.86159e-06	2.78941e-06	3.10452e-06	3.10098e-06	3.78476e-06	3.24737e-06	3.31829e-06	3.98098e-06	3.96558e-06	3.12869e-06	2.96962e-06	3.40681e-06	2.74881e-06	2.33608e-06	2.33384e-06	2.90512e-06	1.94558e-06	2.89526e-06	3.96071e-06
Conidiobolus	3.59318e-07	9.50365e-08	5.74623e-07	1.51068e-07	9.60577e-07	7.96278e-07	9.41368e-07	1.28004e-06	1.55535e-06	1.53159e-06	7.68543e-07	3.20046e-06	7.60365e-07	4.51826e-06	5.99643e-07	1.58237e-06	2.55654e-06	2.85339e-06	2.32822e-06	3.54727e-06	2.35125e-06	9.82425e-06	4.15941e-06	2.52677e-06
Coniella	0	7.17094e-08	0	0	0	0	4.45566e-07	0	5.96285e-07	1.41705e-07	9.66701e-07	0	0	0	1.56301e-07	0	8.85402e-08	7.93645e-07	0	4.48321e-07	0	0	9.2081e-08	0
Coniferiporia	0	0	0	2.63113e-07	0	0	0	0	0	0	0	0	0	0	0	0	0	0	0	0	0	0	0	0
Coniochaeta	8.07048e-07	1.56874e-06	3.28952e-07	1.06311e-06	9.28438e-07	1.18749e-06	3.52036e-06	1.68522e-06	3.44737e-07	1.43296e-06	3.74278e-06	1.50155e-06	8.54171e-07	7.66284e-07	4.58964e-07	2.37433e-06	6.56529e-07	1.14279e-06	1.20198e-06	4.71358e-07	1.19034e-06	3.22252e-07	7.07491e-07	1.55813e-06
Coniophora	1.12054e-07	1.01129e-07	0	3.01662e-07	0	0	0	0	3.29963e-07	9.99199e-08	3.46803e-07	4.62071e-07	4.71429e-07	3.68384e-07	6.70831e-07	1.87072e-07	2.70539e-07	4.63708e-07	0	6.75828e-07	1.22567e-07	0	1.1857e-07	5.05562e-07
Coniothyrium	0	0	0	0	0	9.89482e-08	0	0	2.13865e-07	1.9984e-07	0	0	1.35432e-07	3.77324e-07	9.2135e-08	5.01542e-07	7.98313e-08	0	0	8.57445e-08	0	0	0	0
Conservatibacter	0	0	0	1.86912e-07	0	0	1.83469e-07	8.82667e-08	4.5289e-07	0	3.14025e-07	2.94751e-07	0	3.19616e-07	0	8.58331e-08	0	1.32748e-07	0	0	1.03821e-07	0	2.03662e-07	0
Consotaella	4.41787e-06	5.3937e-06	2.67623e-06	5.42626e-06	5.86756e-06	5.25164e-06	7.60615e-06	5.91351e-06	4.41369e-06	5.30945e-06	4.01036e-06	3.23292e-06	5.39356e-06	2.88378e-06	4.5109e-06	5.16883e-06	5.20438e-06	5.28587e-06	5.55822e-06	3.18209e-06	3.02893e-06	3.00709e-06	3.69793e-06	3.94168e-06
Conyzicola	5.21411e-07	4.63409e-07	6.22483e-07	8.66944e-07	6.35897e-07	7.14675e-07	1.06248e-06	2.2508e-07	1.4318e-06	2.68713e-07	2.44925e-07	1.0711e-06	4.3434e-07	3.8061e-07	7.69743e-07	1.41726e-07	3.27445e-07	1.51975e-06	2.08646e-06	1.53338e-06	1.77751e-06	1.28753e-06	1.2814e-06	1.22564e-06
Coopervirus	0	3.58278e-07	2.0428e-08	1.08369e-06	0	5.08459e-08	0	1.50053e-07	8.4374e-08	0	4.94011e-07	0	4.83041e-08	0	0	0	0	5.52133e-06	1.18897e-05	0	0	0	0	1.45119e-07
Coprinellus	6.72019e-07	2.84821e-06	1.05357e-06	2.39747e-07	1.51043e-06	1.37735e-06	5.8454e-07	1.28753e-06	1.64716e-06	1.167e-06	1.24716e-06	1.69468e-06	2.22722e-06	2.92478e-06	8.41982e-07	2.41241e-06	2.10605e-06	2.34047e-06	6.39615e-06	5.77713e-06	2.1381e-06	5.29677e-06	3.7429e-06	1.08011e-06
Coprinopsis	7.22329e-08	1.22836e-06	1.57439e-06	7.27532e-07	5.97129e-07	4.58512e-07	7.64452e-08	1.50857e-06	4.72051e-07	2.13294e-06	1.36415e-06	2.28002e-06	2.85849e-06	4.8328e-06	1.61007e-06	1.12967e-06	2.43902e-06	4.14622e-06	4.32359e-06	3.80705e-06	1.05622e-06	8.21501e-06	5.47803e-06	3.59776e-06
Coprobacillus	6.82703e-07	3.86859e-07	1.36147e-07	9.20023e-07	1.90935e-06	1.07194e-07	3.79519e-07	1.53068e-06	7.58535e-08	1.15179e-07	3.12354e-07	1.23164e-06	6.90058e-08	4.10782e-07	4.75911e-07	8.5002e-07	1.60884e-07	5.19293e-07	0	4.81428e-07	4.3472e-08	0	1.27916e-07	2.37878e-07
Coprobacter	2.02206e-07	1.03958e-06	3.6623e-07	2.83102e-07	9.12027e-07	9.22184e-07	8.28532e-07	1.17179e-06	8.7434e-07	1.45173e-06	4.48508e-07	5.2889e-07	4.82839e-07	7.2136e-07	2.19561e-06	9.42376e-07	4.53159e-07	2.53563e-07	0	0	0	3.73673e-07	0	2.60235e-07
Coprococcus	3.79516e-06	3.67438e-06	3.48875e-06	3.57411e-06	3.72421e-06	4.16797e-06	6.0297e-06	3.14417e-06	2.31035e-06	2.7704e-06	1.96027e-06	1.73087e-06	2.23921e-06	3.35134e-06	1.92496e-06	4.05793e-06	2.30329e-06	3.17306e-06	2.39442e-06	1.71241e-06	2.24194e-06	1.41158e-06	2.18358e-06	2.39132e-06
Coprothermobacter	1.74739e-06	1.67379e-06	2.65533e-06	7.3994e-07	1.85453e-06	1.38646e-06	1.73253e-06	1.11987e-06	1.12555e-06	2.19676e-06	2.53627e-06	1.32665e-06	1.93818e-06	1.34643e-06	1.38887e-06	2.67461e-06	8.66247e-07	1.13662e-06	1.82531e-06	7.71971e-07	1.71792e-06	1.52786e-06	1.69131e-06	1.24368e-06
Coraliomargarita	1.2242e-05	8.41751e-06	8.15718e-06	1.44277e-05	8.55887e-06	8.10635e-06	8.64929e-06	6.92043e-06	1.11641e-05	9.90872e-06	1.21943e-05	1.09449e-05	1.17557e-05	9.06312e-06	6.2908e-06	1.15528e-05	1.02866e-05	7.94401e-06	8.74807e-06	7.90705e-06	9.79498e-06	6.51758e-06	1.08795e-05	9.26407e-06
Corallincola	1.85694e-06	9.92195e-07	2.1321e-06	1.65048e-06	1.42223e-06	1.12043e-06	1.15385e-06	1.53253e-06	3.20454e-06	1.33298e-06	2.93289e-06	1.00381e-06	1.49112e-06	1.02245e-06	9.88558e-07	3.11385e-06	1.7394e-06	1.18622e-06	1.03609e-06	2.20099e-06	2.3025e-06	1.43324e-06	1.37084e-06	1.38682e-06
Corallococcus	0.000626675	0.000816724	0.00069666	0.000708544	0.00076596	0.000683124	0.000705969	0.000620135	0.00057731	0.000590076	0.000567191	0.000576943	0.000673381	0.000647318	0.000722437	0.000747351	0.000523436	0.000524072	0.000500183	0.000633719	0.000543822	0.000475016	0.000544441	0.00049976
Coralvirus	0	0	0	0	2.17593e-07	0	0	6.80109e-07	0	4.10197e-07	0	0	4.63847e-08	0	0	0	0	0	0	0	0	2.1986e-07	0	2.52646e-07
Cordyceps	6.56357e-07	1.96729e-06	1.82961e-06	1.27544e-06	1.51826e-06	1.14726e-06	1.00102e-06	1.58418e-06	5.55251e-07	6.46228e-07	7.90621e-07	3.77069e-07	5.8679e-07	2.6761e-07	4.49364e-07	4.43664e-07	1.09432e-07	4.76771e-07	2.5381e-07	6.97906e-07	0	3.75492e-07	6.08886e-07	2.80611e-07
Coriobacterium	0	1.74447e-07	0	9.92969e-08	0	1.09338e-06	0	2.31176e-07	1.36318e-07	6.13948e-07	4.57853e-07	2.20397e-07	3.1857e-07	2.14585e-07	4.40982e-07	0	0	0	0	0	1.22567e-07	0	1.66454e-07	3.66433e-08
Corndogvirus	0	0	3.92433e-07	0	0	0	4.45566e-07	0	0	2.88657e-07	0	0	0	8.93663e-08	0	0	0	7.12647e-07	0	0	0	0	0	0
Corticibacter	2.81885e-06	3.30747e-06	2.26097e-06	2.09906e-06	1.48152e-06	4.20601e-06	2.98498e-06	1.25618e-06	3.43752e-06	2.76779e-06	2.92787e-06	3.79212e-06	3.32384e-06	3.15336e-06	1.89232e-06	1.28203e-06	3.18745e-06	4.00747e-06	2.10531e-06	2.78356e-06	2.46961e-06	1.076e-06	3.87647e-06	3.06584e-06
Corticimicrobacter	1.20832e-06	1.23999e-06	2.74634e-06	2.03113e-06	1.54044e-06	1.11006e-06	2.02727e-06	7.50004e-07	1.55591e-06	5.22191e-07	1.70644e-06	3.64693e-07	1.10139e-06	1.43165e-06	2.0904e-06	1.78132e-06	2.81712e-06	1.02782e-06	4.82533e-07	1.67095e-06	1.02673e-06	1.89398e-06	7.60614e-07	4.73772e-07
Corynebacterium	2.16672e-05	2.7739e-05	2.49038e-05	2.6315e-05	2.93696e-05	3.55717e-05	3.2753e-05	3.09624e-05	3.0373e-05	2.77941e-05	2.8699e-05	2.68578e-05	2.73417e-05	2.67523e-05	2.36468e-05	2.94448e-05	2.83316e-05	3.03338e-05	2.57109e-05	2.22345e-05	2.66933e-05	2.28023e-05	2.2428e-05	2.67787e-05
Corynespora	0	1.73363e-07	2.94325e-07	1.62847e-07	0	0	0	4.90635e-08	2.22678e-07	1.08247e-07	5.28333e-07	2.17169e-07	2.8325e-07	6.06639e-07	4.87087e-07	4.69497e-07	0	1.09549e-07	0	0	3.42712e-07	4.10904e-07	0	3.72837e-07
Cosenzaea	0	0	0	0	0	0	0	8.62376e-08	8.84957e-08	0	0	0	1.61014e-07	2.34201e-07	0	1.6772e-07	0	0	0	2.40479e-07	0	0	0	0
Costertonia	0	4.25191e-07	3.20396e-07	1.04523e-07	4.52699e-07	1.24767e-06	1.02598e-07	0	2.10935e-07	1.96186e-07	2.95553e-07	9.68858e-08	3.83786e-07	1.33173e-07	1.40912e-07	5.02489e-07	0	2.94354e-07	5.44051e-07	1.02557e-07	0	0	0	0
Couchioplanes	2.91819e-05	5.32559e-05	3.15431e-05	3.37065e-05	3.50804e-05	4.65518e-05	4.4589e-05	7.69957e-05	3.34439e-05	3.68174e-05	5.25923e-05	2.9505e-05	3.52169e-05	3.63327e-05	3.19813e-05	3.35111e-05	2.49999e-05	5.53126e-05	2.2352e-05	2.44196e-05	8.02682e-05	2.28607e-05	6.97728e-05	2.04504e-05
Coxiella	5.57118e-06	8.64415e-06	5.25662e-06	7.1526e-06	5.03766e-06	4.51124e-06	4.9718e-06	4.65062e-06	5.76313e-06	6.144e-06	7.44406e-06	5.70204e-06	6.89051e-06	4.20153e-06	6.12782e-06	6.20652e-06	3.08398e-06	3.67298e-06	5.8807e-06	4.90604e-06	3.56298e-06	6.20477e-06	3.9084e-06	4.52023e-06
Crassaminicella	2.28832e-07	8.49611e-07	3.09041e-07	1.57414e-06	6.1688e-07	3.27265e-07	0	9.21736e-07	6.19082e-07	1.07814e-07	0	5.39447e-07	7.20881e-07	2.84232e-07	5.44434e-08	1.10565e-06	1.83116e-07	7.34995e-07	1.63689e-07	0	0	0	0	1.14292e-07
Crateriforma	1.23075e-06	2.05307e-06	1.98354e-06	1.17991e-06	2.68773e-07	1.48036e-06	1.69786e-06	9.52472e-07	1.66226e-06	1.39997e-06	1.51929e-06	9.37233e-07	2.42778e-06	1.54656e-06	1.4073e-06	1.23169e-06	5.56538e-07	2.97761e-07	1.79303e-06	2.12491e-06	2.32877e-07	5.32879e-07	1.05205e-06	1.54058e-06
Craurococcus	2.1449e-06	3.57976e-06	1.17614e-06	2.09034e-06	2.22961e-06	2.00232e-06	1.32984e-06	2.80182e-06	2.61875e-06	2.65667e-06	1.81936e-06	4.46779e-06	1.814e-06	2.79561e-06	1.94815e-06	1.74144e-06	3.8204e-06	1.31017e-06	3.18681e-06	1.70231e-06	1.33294e-06	9.17112e-07	1.08427e-06	1.66834e-06
Crenalkalicoccus	1.5705e-05	2.51974e-05	1.49044e-05	2.06211e-05	1.39791e-05	1.74511e-05	1.79515e-05	2.01802e-05	1.31373e-05	1.64874e-05	2.13768e-05	1.22822e-05	1.62118e-05	1.7482e-05	1.97542e-05	1.74346e-05	1.54669e-05	1.99339e-05	1.82903e-05	1.48033e-05	1.63439e-05	1.13152e-05	1.38118e-05	1.31056e-05
Crenobacter	2.53155e-05	2.7068e-05	2.21589e-05	2.48558e-05	2.24788e-05	1.97665e-05	2.4423e-05	1.94096e-05	2.48188e-05	2.0587e-05	2.04064e-05	2.32987e-05	2.47297e-05	1.63113e-05	2.12887e-05	1.91878e-05	1.94542e-05	2.95251e-05	2.35908e-05	2.14807e-05	2.21306e-05	1.81858e-05	2.79232e-05	2.32003e-05
Crenothrix	9.71806e-06	1.61613e-05	1.21095e-05	1.1277e-05	8.76956e-06	7.29614e-06	9.72045e-06	1.01889e-05	1.0412e-05	1.30243e-05	8.52043e-06	9.48885e-06	1.23225e-05	7.9477e-06	1.45081e-05	8.96861e-06	1.11282e-05	8.73622e-06	9.34187e-06	7.55263e-06	8.39948e-06	5.76251e-06	1.04952e-05	1.19374e-05
Criblamydia	9.06654e-07	1.68382e-06	1.65087e-06	1.04671e-06	1.78673e-06	7.24261e-07	9.66101e-07	3.78156e-07	7.88629e-07	1.83135e-06	7.72604e-07	8.30153e-07	2.04529e-06	2.56594e-06	1.72338e-06	1.48478e-06	1.14023e-06	7.97626e-07	1.27108e-06	1.31235e-06	6.86785e-07	6.13225e-07	2.47371e-07	3.99267e-07
Cribrihabitans	4.55342e-07	4.32221e-07	6.74485e-07	1.22007e-06	8.47683e-07	5.89727e-07	1.0537e-07	7.08756e-07	0	3.31227e-07	1.96286e-07	5.05491e-07	1.03044e-07	7.3214e-07	8.80752e-07	6.05019e-07	3.04357e-07	2.19017e-07	4.51782e-07	6.97389e-07	1.19254e-07	1.12901e-07	0	0
Cricetibacter	0	2.99545e-07	0	0	0	0	0	0	6.99921e-08	2.12557e-07	0	2.86676e-07	8.86594e-08	8.59726e-08	0	2.65302e-07	1.23284e-07	0	0	0	1.60451e-07	1.05756e-07	0	0
Criibacterium	3.49607e-07	6.31042e-08	0	1.09179e-07	0	1.23487e-07	6.23793e-08	2.85281e-07	0	0	0	1.11612e-07	1.33918e-07	0	0	9.10517e-08	0	0	0	1.67373e-07	2.45189e-07	8.48168e-08	0	7.68044e-08
Crinalium	1.4752e-05	1.96948e-05	1.65967e-05	1.59148e-05	1.70096e-05	1.83807e-05	2.30274e-05	1.43667e-05	1.66741e-05	2.0758e-05	1.7753e-05	1.84331e-05	1.70798e-05	1.94581e-05	1.70425e-05	2.13028e-05	1.99715e-05	1.76413e-05	2.12662e-05	1.63073e-05	1.66755e-05	1.21119e-05	1.51895e-05	1.92841e-05
Croceibacter	0	0	0	0	9.72201e-08	4.349e-07	7.48368e-07	3.60235e-07	0	0	1.09226e-07	0	0	1.04649e-06	0	0	1.41151e-07	0	0	0	0	2.1986e-07	0	0
Croceibacterium	1.04582e-05	9.97909e-06	9.17025e-06	1.09872e-05	1.20444e-05	1.38071e-05	1.59024e-05	1.4719e-05	3.30474e-05	1.66705e-05	1.42472e-05	1.44874e-05	1.38702e-05	1.19635e-05	1.32657e-05	1.13765e-05	2.33245e-05	2.40696e-05	3.05704e-05	2.02398e-05	1.50413e-05	1.22053e-05	1.22198e-05	1.66608e-05
Croceicoccus	7.72356e-05	6.22316e-05	5.25128e-05	6.22505e-05	8.11463e-05	7.02035e-05	8.03922e-05	8.27987e-05	0.000301175	8.56136e-05	8.34927e-05	8.80397e-05	6.93236e-05	7.8141e-05	6.39655e-05	6.89088e-05	0.000101852	0.000136898	0.00011314	0.000133159	0.000105096	6.74393e-05	7.77737e-05	9.40403e-05
Croceitalea	6.57805e-07	1.14541e-06	5.74687e-07	6.27451e-07	1.58009e-06	1.38713e-06	1.97717e-06	1.36368e-06	1.35514e-06	1.34565e-06	9.68316e-07	8.31262e-07	6.43217e-07	3.55954e-07	4.54246e-07	8.80094e-07	2.11021e-07	1.34328e-07	5.68347e-07	4.45593e-07	4.52555e-07	1.07111e-07	0	0
Croceivirga	8.82846e-08	4.82793e-07	5.82618e-07	6.81027e-07	0	6.80552e-07	7.15359e-08	3.47892e-07	7.75609e-07	9.39379e-07	7.88157e-07	6.91406e-07	7.19289e-07	7.4774e-07	3.85128e-07	5.24029e-07	8.30634e-07	8.24971e-07	5.9445e-07	2.46029e-07	0	0	4.40116e-07	1.37151e-07
Crocinitomix	4.65328e-06	1.07641e-05	9.76455e-06	9.29206e-06	7.64159e-06	6.08337e-06	6.417e-06	5.05183e-06	4.89125e-06	5.25419e-06	6.20099e-06	7.14039e-06	3.8694e-06	6.93228e-06	5.11799e-06	5.54412e-06	3.82282e-06	5.37791e-06	6.73798e-06	4.58012e-06	1.69919e-05	3.09334e-06	2.68182e-06	5.04271e-06
Crocosphaera	6.86949e-06	6.92208e-06	4.45986e-06	7.45206e-06	9.91254e-06	1.17996e-05	9.35839e-06	8.46861e-06	6.10254e-06	6.61728e-06	7.75775e-06	7.57894e-06	8.18785e-06	5.94967e-06	7.23882e-06	5.93949e-06	3.72204e-06	5.85509e-06	5.99047e-06	6.45123e-06	6.95374e-06	6.50337e-06	5.70326e-06	6.78997e-06
Cronobacter	2.84878e-06	2.50409e-06	4.72822e-06	1.68042e-06	3.20101e-06	3.40768e-06	3.62562e-06	3.45394e-06	3.94118e-06	5.46862e-06	3.33797e-06	6.09755e-06	3.70354e-06	1.21155e-05	4.48087e-06	5.21219e-06	5.65299e-06	8.7557e-06	6.22543e-06	1.05272e-05	3.76116e-06	1.39323e-05	1.17645e-05	2.94331e-06
Crossiella	1.35877e-05	1.75188e-05	1.60676e-05	1.56035e-05	1.82221e-05	1.40853e-05	1.94608e-05	1.95646e-05	1.50167e-05	1.32563e-05	1.5681e-05	1.35068e-05	1.61709e-05	1.88964e-05	1.55166e-05	2.48956e-05	1.17901e-05	1.28945e-05	8.16928e-06	8.87563e-06	7.86426e-06	9.05114e-06	1.30225e-05	1.16072e-05
Crucibulum	7.28348e-08	3.6623e-07	3.10676e-07	2.64792e-07	9.45196e-08	0	3.03795e-07	9.49705e-08	0	5.2205e-07	0	0	1.07007e-06	5.3608e-07	7.09191e-07	1.01331e-07	1.23284e-07	1.0628e-06	4.70606e-07	7.94494e-07	3.3512e-07	8.69754e-07	8.97822e-07	2.66682e-07
Cruoricaptor	3.30523e-07	4.22957e-07	1.43273e-07	1.00554e-07	1.08101e-06	7.59418e-07	1.79185e-06	3.08443e-07	1.08731e-06	6.64952e-07	2.6288e-07	0	1.24728e-07	2.16924e-07	1.9823e-07	4.31841e-07	1.21743e-07	6.79236e-07	7.05909e-07	0	1.80398e-06	9.28299e-08	1.09565e-07	3.64578e-07
Cryobacterium	2.50996e-05	3.53259e-05	3.39389e-05	3.08515e-05	3.69025e-05	3.23612e-05	3.50025e-05	3.63425e-05	3.21308e-05	3.47441e-05	3.04997e-05	3.02645e-05	3.5857e-05	3.56214e-05	3.68945e-05	4.24381e-05	3.57169e-05	2.90303e-05	3.06299e-05	2.71299e-05	2.89887e-05	2.71523e-05	3.01952e-05	2.62897e-05
Cryocola	1.21391e-07	7.65828e-08	7.21122e-07	6.29998e-07	0	1.32828e-06	0	0	7.39856e-07	0	9.78779e-08	3.57732e-07	0	0	9.2135e-08	9.47508e-08	0	3.13433e-07	1.56869e-07	0	0	4.64149e-07	0	0
Cryomorpha	1.24643e-06	2.30024e-06	1.59455e-06	3.11618e-06	1.65577e-06	1.66204e-06	2.14583e-06	2.29158e-06	1.42579e-06	3.12754e-06	2.18284e-06	2.47464e-06	1.39012e-06	2.19887e-06	3.14946e-06	4.49209e-06	1.146e-06	2.2107e-06	5.9046e-07	1.22454e-06	1.00193e-06	1.46119e-06	6.25591e-07	6.49513e-07
Cryomyces	0	3.03386e-07	0	0	0	9.76957e-08	0	3.79882e-07	3.94827e-07	3.20291e-07	0	3.07755e-07	0	0	0	0	0	5.78645e-07	0	0	4.86019e-07	0	0	0
Cryphonectria	5.74375e-07	8.69829e-07	7.23906e-08	3.85619e-07	1.98216e-07	1.49863e-07	1.23221e-06	2.91366e-07	2.84212e-07	2.27002e-07	6.44154e-08	1.92542e-07	2.04003e-07	9.09165e-07	1.08409e-07	1.31363e-06	2.563e-07	1.92882e-07	1.09656e-07	1.20223e-06	3.42712e-07	5.69721e-07	0	3.39377e-07
Cryptobacterium	0	4.99242e-07	0	0	0	0	0	0	0	0	1.07666e-07	0	0	0	9.09688e-08	6.60721e-07	7.26822e-07	1.68412e-07	7.91664e-07	0	5.26855e-07	0	0	0
Cryptococcus	0.000648972	0.000651808	0.000557123	0.000604273	0.000613079	0.000620428	0.000563031	0.000643137	0.00066855	0.000730759	0.000646455	0.000611433	0.000714832	0.000645811	0.000592017	0.000725051	2.46727e-06	3.63943e-06	4.01256e-06	5.9252e-06	2.47372e-06	7.6866e-06	5.09491e-06	4.33246e-06
Cryptosporangium	6.08018e-05	6.7651e-05	8.09759e-05	6.65489e-05	9.60858e-05	0.000110253	0.000115067	0.000110981	6.23772e-05	6.14401e-05	8.23529e-05	5.59214e-05	5.89728e-05	6.46482e-05	6.02458e-05	5.87685e-05	5.7937e-05	6.92969e-05	5.90008e-05	5.44647e-05	5.84072e-05	4.1931e-05	5.76553e-05	4.47662e-05
Cucumibacter	2.08595e-06	3.47573e-06	3.05875e-06	2.53326e-06	2.02305e-06	3.22322e-06	3.44773e-06	3.93169e-06	8.70491e-06	7.11644e-06	5.89161e-06	3.40337e-06	4.6817e-06	2.39131e-06	3.86272e-06	4.1156e-06	5.90969e-05	2.62954e-05	1.95735e-05	2.72396e-05	1.6681e-06	2.63179e-06	2.30943e-06	4.34209e-06
Cucurbitaria	0	0	0	0	0	0	2.92403e-07	1.64894e-07	8.46058e-08	3.42582e-07	0	1.53314e-07	8.75511e-08	0	0	0	0	0	0	0	0	3.13301e-07	0	0
Cudoniella	4.51478e-07	3.82914e-08	2.83148e-07	4.90626e-07	1.32144e-07	0	1.97403e-07	4.08782e-07	0	9.86551e-08	7.78451e-07	4.41505e-07	0	0	2.72906e-07	0	0	4.70149e-07	1.42969e-07	1.32416e-10	0	4.23022e-07	1.09565e-07	0
Culturomica	3.2371e-07	9.73831e-08	6.12758e-07	9.46527e-07	3.47233e-07	4.21526e-07	3.56111e-07	3.01921e-07	7.82003e-07	5.01067e-07	1.14558e-06	4.41448e-07	1.71886e-07	5.17552e-07	2.67416e-07	7.64709e-07	7.74933e-07	1.90488e-06	5.05726e-07	4.04309e-07	3.83852e-07	7.37224e-07	2.1913e-07	5.32978e-07
Cumulibacter	5.04323e-06	6.50989e-06	1.15854e-05	8.40759e-06	9.85749e-06	9.98268e-06	9.85925e-06	1.1125e-05	5.17219e-06	7.44358e-06	4.67635e-06	6.82197e-06	8.54341e-06	7.53706e-06	7.90418e-06	6.43947e-06	7.58909e-06	3.50066e-06	6.35679e-06	5.65253e-06	8.43051e-06	4.24094e-06	6.60398e-06	5.31877e-06
Cuneatibacter	1.21391e-07	3.28668e-07	1.03559e-07	2.09955e-07	1.53851e-07	5.37479e-07	4.81322e-07	0	1.09147e-06	0	1.24312e-07	3.70043e-07	7.6968e-08	4.90144e-07	0	2.02433e-08	0	0	0	0	2.45134e-07	1.28809e-07	7.48016e-07	0
Cuniculiplasma	4.77888e-07	7.2643e-07	2.95296e-07	2.99267e-07	6.73803e-08	3.82077e-07	1.54404e-07	1.48568e-07	0	3.48974e-07	7.46198e-08	1.38134e-07	0	2.50222e-07	0	4.35571e-07	0	0	0	0	0	0	8.56992e-08	2.85165e-07
Cupriavidus	0.000835672	0.000822373	0.00172356	0.000847404	0.000734833	0.000778396	0.000786977	0.00111849	0.000759554	0.000615205	0.000818392	0.000678219	0.000609174	0.000532286	0.000564594	0.000563681	0.000657474	0.000792931	0.000619543	0.00065043	0.000683903	0.000615646	0.000758761	0.000896969
Curtobacterium	1.56018e-05	2.02205e-05	1.96073e-05	1.73907e-05	2.10293e-05	1.941e-05	2.23534e-05	2.29243e-05	1.34415e-05	1.5547e-05	1.67631e-05	1.42042e-05	1.79843e-05	1.96842e-05	1.97367e-05	1.79381e-05	1.29471e-05	1.55775e-05	1.61739e-05	1.20455e-05	1.03913e-05	1.10065e-05	1.20755e-05	1.62198e-05
Curvibacter	0.000115051	0.000109404	0.000117679	9.09472e-05	9.60518e-05	9.97628e-05	8.5485e-05	0.000103987	0.000235677	9.5696e-05	0.000100975	9.59293e-05	8.0838e-05	7.35503e-05	8.70567e-05	7.89897e-05	0.000107328	0.000128605	0.00011303	0.00010326	9.23613e-05	8.00361e-05	8.73556e-05	9.90057e-05
Curvularia	2.33071e-07	0	2.98249e-07	2.1341e-07	0	1.90567e-07	2.12631e-05	3.70502e-07	0	0	0	0	0	9.43311e-08	2.99439e-07	2.02661e-07	0	0	0	0	0	0	0	0
Cuspidothrix	2.1698e-06	2.42014e-06	2.50638e-06	1.98719e-06	2.0028e-06	1.39669e-06	1.24854e-06	1.59881e-06	1.46124e-06	9.96494e-07	1.2661e-06	1.87933e-06	2.46504e-06	2.32844e-06	1.17969e-06	3.15239e-06	1.2457e-06	1.49308e-06	2.8719e-06	1.3108e-06	1.13215e-06	1.39289e-06	7.19717e-07	1.90947e-06
Cutaneotrichosporon	8.92811e-07	4.96163e-07	2.55702e-07	1.73502e-07	4.91001e-07	1.43875e-07	2.74993e-07	4.79708e-07	1.17544e-07	1.10923e-06	2.70361e-07	5.9279e-07	8.45721e-07	7.7997e-07	1.04153e-07	1.28851e-06	2.89844e-07	6.3713e-07	0	1.24343e-06	4.11189e-07	1.0726e-06	1.04476e-06	2.85712e-07
Cutibacterium	1.06445e-05	1.11643e-05	1.19416e-05	1.11958e-05	1.25893e-05	1.36469e-05	8.72403e-06	1.28669e-05	9.37667e-06	1.1522e-05	8.93608e-06	1.2892e-05	1.05826e-05	1.1053e-05	1.17494e-05	1.01348e-05	1.16135e-05	1.13892e-05	1.25086e-05	1.2613e-05	1.26322e-05	1.13637e-05	1.14413e-05	1.24585e-05
Cyanobacterium	1.03602e-06	1.65209e-06	1.91308e-06	2.77383e-06	1.41387e-06	3.41993e-06	1.74866e-06	2.04582e-06	3.50118e-06	1.68063e-06	1.49351e-06	2.03827e-06	1.84984e-06	1.99567e-06	1.31862e-06	2.01782e-06	2.19897e-06	2.52145e-06	8.74523e-07	1.78738e-06	2.77775e-06	8.22705e-07	5.28571e-07	3.54725e-07
Cyanobium	2.56312e-05	2.34689e-05	2.58659e-05	2.79605e-05	2.35925e-05	2.17383e-05	2.41243e-05	2.20393e-05	2.71023e-05	2.19288e-05	2.58417e-05	2.30397e-05	2.12618e-05	2.54342e-05	1.90506e-05	2.20608e-05	2.60916e-05	2.53542e-05	2.6804e-05	2.09174e-05	3.26727e-05	2.24561e-05	2.71758e-05	2.50211e-05
Cyanosarcina	6.92934e-06	7.49488e-06	1.07995e-05	7.64322e-06	9.19345e-06	7.72376e-06	7.49849e-06	8.52774e-06	7.18169e-06	8.79816e-06	9.91244e-06	1.00702e-05	8.04464e-06	8.24469e-06	8.63449e-06	5.65332e-06	1.09517e-05	1.11504e-05	5.80104e-06	1.11715e-05	8.70832e-06	5.62504e-06	8.2919e-06	1.12151e-05
Cyanothece	3.51107e-05	3.85941e-05	3.94964e-05	3.82488e-05	3.59986e-05	3.56004e-05	3.84398e-05	3.67329e-05	3.94038e-05	3.85914e-05	3.89962e-05	4.27139e-05	3.91041e-05	3.45121e-05	4.34214e-05	3.8614e-05	4.47349e-05	4.04107e-05	3.99597e-05	4.32221e-05	4.02587e-05	3.12235e-05	2.98754e-05	3.98644e-05
Cyberlindnera	1.13509e-07	0	0	1.93203e-07	6.18674e-08	6.41443e-07	0	3.85475e-07	5.31144e-07	6.77983e-07	1.64573e-07	4.8921e-07	4.63847e-07	1.39027e-06	1.89119e-07	7.66264e-07	2.70331e-07	2.63607e-07	7.0784e-07	2.37171e-06	5.31494e-07	2.9722e-06	1.28309e-06	1.57355e-07
Cyclobacterium	1.74572e-05	1.76196e-05	1.88795e-05	2.28745e-05	1.48386e-05	2.0482e-05	2.1815e-05	1.89614e-05	2.37723e-05	3.08473e-05	2.40942e-05	2.49206e-05	2.41627e-05	1.98464e-05	2.4864e-05	2.39926e-05	3.35876e-05	2.36737e-05	2.46365e-05	2.37674e-05	2.86912e-05	1.77193e-05	1.97894e-05	2.21555e-05
Cycloclasticus	6.02833e-06	6.67034e-06	7.04926e-06	6.79509e-06	6.75972e-06	5.50402e-06	9.42436e-06	5.40501e-06	7.46959e-06	7.30803e-06	6.59205e-06	9.62606e-06	7.47666e-06	7.63843e-06	7.57649e-06	9.24758e-06	4.31353e-06	4.83311e-06	6.9422e-06	5.51376e-06	7.32671e-06	6.03401e-06	6.97988e-06	9.00481e-06
Cylindrobasidium	0	0	1.49125e-07	7.94376e-08	2.87256e-07	0	0	4.6009e-07	1.13222e-07	8.26734e-07	0	1.60363e-07	9.86492e-08	9.33762e-07	2.69495e-07	2.87993e-07	2.66833e-07	1.54569e-07	0	7.90154e-07	6.81521e-07	1.51361e-06	5.82476e-07	1.31514e-07
Cylindrospermopsis	8.48484e-06	8.5328e-06	9.04033e-06	9.77587e-06	6.1019e-06	6.06207e-06	6.70069e-06	8.36437e-06	6.66665e-06	5.48364e-06	3.82802e-06	7.54817e-06	9.93949e-06	7.77501e-06	5.27735e-06	6.07901e-06	4.03484e-06	4.68523e-06	5.87958e-06	6.6909e-06	5.69456e-06	3.50033e-06	4.57473e-06	5.13453e-06
Cylindrospermum	2.54433e-05	3.1889e-05	3.41227e-05	2.72079e-05	3.42653e-05	3.71315e-05	2.87199e-05	2.74297e-05	2.46462e-05	2.92668e-05	2.83862e-05	2.73831e-05	2.38896e-05	2.52321e-05	3.35308e-05	3.00288e-05	2.82605e-05	3.08827e-05	3.11823e-05	2.82561e-05	3.32649e-05	2.85001e-05	2.96107e-05	3.53271e-05
Cyphellophora	0	0	2.90503e-07	0	2.95887e-07	0	0	5.03612e-07	0	0	0	0	0	0	0	3.8399e-07	1.43227e-07	6.6374e-07	0	0	0	0	0	0
Cysteiniphilum	6.58147e-07	9.21202e-07	5.58931e-06	1.16436e-06	1.60564e-06	8.20236e-07	1.26838e-06	3.14647e-07	3.37488e-07	2.00923e-07	1.75389e-07	5.72186e-07	1.56867e-07	2.55511e-07	1.01854e-06	4.45113e-07	3.4936e-07	1.71094e-07	6.78552e-07	1.4944e-07	0	5.93774e-07	4.02545e-07	1.64776e-07
Cystobacter	0.000206508	0.000255183	0.000232407	0.000246176	0.000221875	0.000225808	0.000259402	0.000196087	0.000186255	0.000176821	0.000177067	0.000173718	0.000239693	0.000208341	0.000253187	0.000245351	0.000141698	0.00016293	0.000122546	0.000224835	0.000148329	0.000124935	0.000161057	0.000150218
Cytobacillus	7.22583e-06	5.40802e-06	8.91713e-06	7.58515e-06	8.43758e-06	6.09093e-06	8.07612e-06	4.07623e-06	7.05583e-06	6.84148e-06	6.12806e-06	6.38776e-06	6.51172e-06	6.33172e-06	7.17033e-06	7.24577e-06	5.43569e-06	4.82485e-06	4.10978e-06	6.03026e-06	7.99557e-06	4.46582e-06	4.09871e-06	7.36793e-06
Cytophaga	2.05642e-05	4.55602e-05	2.93544e-05	3.1046e-05	4.15284e-05	3.19879e-05	5.48456e-05	3.48806e-05	3.30281e-05	6.88524e-05	2.96108e-05	2.8687e-05	2.85456e-05	3.1774e-05	2.64355e-05	3.18863e-05	1.50834e-05	1.16733e-05	2.13873e-05	1.82806e-05	4.67766e-05	1.28917e-05	1.15124e-05	1.62108e-05
Cytospora	3.58879e-07	5.80002e-08	1.6623e-07	1.7523e-07	2.74928e-07	2.55203e-07	3.7095e-07	8.95527e-07	3.13523e-07	6.7152e-07	1.98332e-07	5.12925e-08	5.3204e-07	3.44412e-07	2.21937e-07	9.59975e-08	0	0	0	1.37643e-07	0	2.1986e-07	0	0
Dacryopinax	1.16536e-07	2.25372e-07	5.13885e-07	1.03166e-07	0	4.71906e-07	1.11392e-07	1.00036e-07	4.22385e-07	9.65326e-07	1.02699e-06	9.05548e-07	8.56858e-07	1.55719e-06	1.02665e-07	1.02758e-07	1.98764e-07	7.92453e-07	6.60034e-07	1.12368e-06	2.48587e-07	3.09776e-06	1.19281e-06	7.04847e-07
Dactylella	5.98254e-07	2.1611e-07	0	1.08819e-07	1.55592e-06	4.67307e-07	1.59465e-06	8.4987e-07	1.50512e-06	7.48261e-07	7.63417e-07	9.22923e-07	7.6262e-07	2.74892e-06	8.76407e-08	1.58652e-06	1.23131e-06	1.93717e-06	5.72905e-07	1.66719e-06	7.58327e-07	1.40257e-06	0	1.37855e-06
Dactylellina	6.85693e-07	6.36995e-07	2.17973e-06	1.32221e-06	1.51443e-06	1.74017e-06	9.71869e-07	1.20913e-06	1.20747e-06	1.41445e-06	5.58035e-07	4.93149e-07	1.34694e-06	2.36011e-06	1.31495e-06	1.11258e-06	2.06968e-07	1.68412e-07	2.68918e-07	3.42077e-07	2.95221e-07	6.19716e-07	2.90976e-07	5.52532e-07
Dactylococcopsis	1.02167e-06	1.15444e-06	1.47564e-06	1.21022e-06	7.56157e-08	1.79115e-06	6.9556e-07	9.17201e-07	9.25713e-07	1.57029e-06	1.77782e-06	6.2805e-07	1.09338e-06	2.21473e-06	7.13453e-07	1.01237e-06	1.89988e-06	1.88762e-06	2.7511e-06	2.70178e-06	1.27378e-06	2.29274e-06	2.39673e-06	5.19834e-07
Dactylosporangium	0.000189327	0.000198896	0.000172767	0.000188873	0.000195933	0.000181773	0.000249196	0.000385872	0.000210666	0.00018257	0.000596388	0.00024101	0.000176681	0.000162075	0.000214913	0.000181183	0.000180755	0.000182776	0.000157876	9.56479e-05	0.00020205	0.000173568	0.000177387	0.000189191
Daedalea	1.09181e-06	6.43868e-07	1.00128e-06	1.40688e-06	4.71728e-07	6.52157e-07	5.45396e-07	9.29587e-07	7.30951e-07	7.89638e-07	1.19304e-06	9.8852e-07	7.73107e-07	6.98617e-07	8.01724e-07	8.27978e-07	2.97883e-07	1.71179e-07	7.92971e-07	2.8821e-07	6.34643e-07	6.14154e-07	1.20215e-06	2.68769e-07
Daejeonella	1.59558e-05	1.39257e-05	2.09273e-05	1.87344e-05	1.02628e-05	1.52571e-05	1.76041e-05	1.45695e-05	2.04099e-05	2.37323e-05	2.07137e-05	2.06136e-05	2.48606e-05	2.06885e-05	2.55878e-05	2.20634e-05	2.53678e-05	2.22516e-05	2.27836e-05	2.27143e-05	3.11162e-05	1.7297e-05	1.84409e-05	2.77466e-05
Dakarella	0	5.1221e-07	9.68342e-08	1.03166e-07	0	0	3.03795e-07	0	0	1.94844e-07	4.36904e-07	0	0	2.95297e-07	2.69495e-07	1.89502e-07	0	0	0	0	2.55792e-07	0	0	0
Daldinia	0	0	0	0	0	0	9.682e-07	2.8135e-07	2.19975e-07	2.22679e-07	2.0935e-07	2.98962e-07	0	5.06622e-07	7.48597e-08	1.04226e-07	0	0	0	9.99918e-07	0	0	0	1.35219e-07
Dankookia	1.96932e-05	2.20762e-05	2.16032e-05	1.91023e-05	2.14721e-05	1.68139e-05	1.76321e-05	1.86672e-05	2.07817e-05	2.21629e-05	2.067e-05	1.86782e-05	1.87804e-05	1.61286e-05	2.02108e-05	1.72268e-05	1.76157e-05	2.03432e-05	1.77396e-05	1.7599e-05	1.45583e-05	1.49099e-05	1.55895e-05	1.98968e-05
Dasania	8.48653e-07	1.3165e-06	8.53079e-07	1.10308e-06	1.69494e-06	1.44181e-06	3.53539e-06	2.65202e-06	1.24401e-06	1.88754e-06	1.07685e-06	8.65945e-07	2.61545e-06	1.00953e-06	8.1921e-07	1.09363e-06	2.56262e-06	1.48332e-06	3.49659e-07	3.61011e-07	6.79061e-07	5.97231e-07	8.40351e-08	1.92184e-07
Debaryomyces	0	0	0	0	0	7.56663e-08	0	0	1.06932e-07	3.29313e-07	0	1.71894e-07	3.33263e-07	4.20152e-07	0	0	3.89577e-07	0	7.78422e-07	1.46112e-06	1.73036e-07	6.42402e-07	3.69985e-07	5.0705e-07
Dechloromonas	0.000120695	0.000126607	0.000143851	0.0001219	0.000156197	9.98381e-05	8.90778e-05	0.000110919	0.000138496	0.00016091	0.000119149	0.000165753	0.000127308	0.000213909	0.000121506	0.000112606	0.000168668	0.000293211	0.000178265	0.000213668	0.000133007	0.00027874	0.000229961	0.000158764
Decorospora	0	0	0	0	0	0	0	0	0	0	0	0	0	3.88105e-07	0	0	0	0	0	0	0	0	0	0
Decurrovirus	0	3.53195e-07	0	0	0	0	0	0	2.96785e-06	3.23639e-06	2.30254e-06	2.38967e-06	2.48098e-07	6.62863e-07	1.10402e-07	3.88142e-07	0	0	0	0	0	0	0	0
Deefgea	4.02583e-06	3.15988e-06	4.51523e-06	4.33827e-06	5.08378e-06	1.4534e-06	3.17891e-06	3.32026e-06	5.92726e-06	2.79825e-06	4.21655e-06	4.79324e-06	3.47103e-06	1.75297e-06	2.23267e-06	3.31232e-06	4.57136e-06	6.32817e-06	4.35553e-06	3.14934e-06	3.02671e-06	2.68068e-06	3.27389e-06	2.70294e-06
Deferribacter	1.15448e-06	9.30533e-07	1.54843e-06	1.04741e-06	1.18006e-06	6.53388e-07	1.87968e-06	1.87922e-06	8.96242e-07	2.35966e-06	1.13052e-06	1.48404e-06	1.09979e-06	1.80412e-06	1.44621e-06	4.39574e-07	7.112e-07	1.28354e-06	8.32319e-07	5.43951e-07	1.17687e-06	1.03218e-06	6.67041e-07	1.4808e-06
Deferrisoma	6.60127e-06	1.09483e-05	8.44775e-06	9.58748e-06	5.07407e-06	7.23337e-06	8.78407e-06	8.73623e-06	5.82643e-06	9.45649e-06	8.84919e-06	8.64942e-06	1.02855e-05	7.45783e-06	1.03923e-05	1.03804e-05	8.64133e-06	7.29887e-06	9.42956e-06	7.84924e-06	9.83165e-06	5.49927e-06	8.9581e-06	8.1559e-06
Defluviicoccus	3.29369e-05	4.34363e-05	3.91677e-05	3.28751e-05	3.17741e-05	3.4749e-05	3.39964e-05	3.53038e-05	3.82155e-05	3.45118e-05	3.03483e-05	3.15473e-05	3.73503e-05	3.50513e-05	3.37072e-05	3.34463e-05	3.22788e-05	3.14104e-05	3.62965e-05	3.8709e-05	2.91691e-05	2.18644e-05	3.00043e-05	3.09306e-05
Defluviimonas	6.74731e-06	5.51327e-06	5.6607e-06	1.19616e-05	6.21769e-06	7.25935e-06	6.8374e-06	9.0585e-06	6.94079e-06	6.85884e-06	7.4352e-06	7.74978e-06	6.3681e-06	5.94945e-06	8.96236e-06	8.33662e-06	1.28397e-05	1.04164e-05	1.41421e-05	1.14833e-05	7.60011e-06	5.70925e-06	9.33739e-06	9.95854e-06
Defluviitalea	1.50107e-07	5.15877e-07	6.84058e-08	2.28018e-07	3.11175e-07	4.4285e-07	6.23793e-08	1.56896e-07	5.37685e-07	3.15087e-07	7.92041e-07	9.30103e-08	5.60327e-08	0	3.20427e-07	3.35423e-07	6.06138e-07	1.03519e-07	3.32329e-07	3.09457e-07	2.13172e-07	1.53297e-07	1.19114e-07	4.76504e-08
Defluviitoga	0	0	0	0	0	0	0	0	0	0	4.12964e-07	0	0	0	0	0	0	0	0	0	0	0	0	0
Dehalobacter	1.58696e-06	9.33178e-07	1.48763e-06	2.25853e-06	1.85955e-06	1.29532e-06	1.42998e-06	1.32511e-06	1.68655e-06	2.08508e-06	2.40174e-06	1.16682e-06	2.09903e-06	1.6379e-06	1.76523e-06	2.28948e-06	4.86971e-07	1.04271e-06	8.37617e-07	5.44246e-07	8.01257e-07	3.42201e-07	3.32047e-07	9.68644e-07
Dehalobacterium	1.28532e-07	2.49262e-08	0	4.4781e-07	6.72535e-07	7.90679e-07	3.04034e-07	6.48014e-07	2.0531e-07	4.36762e-07	1.06149e-07	2.55211e-07	5.73752e-07	0	2.15596e-07	7.03525e-07	9.73942e-08	3.76119e-07	0	0	1.29777e-07	4.45583e-07	1.2405e-06	3.94543e-07
Dehalococcoides	5.61855e-06	5.91224e-06	5.81171e-06	5.40466e-06	4.0793e-06	6.46592e-06	3.72161e-06	4.02695e-06	4.34575e-06	4.64192e-06	4.86254e-06	5.06554e-06	6.14066e-06	4.71467e-06	6.76703e-06	4.82664e-06	4.92995e-06	3.04756e-06	6.19108e-06	1.55667e-06	3.78583e-06	3.21507e-06	5.4111e-06	5.53756e-06
Dehalogenimonas	9.0174e-06	1.17633e-05	1.09263e-05	1.20202e-05	1.24888e-05	1.28241e-05	1.43228e-05	1.12403e-05	8.64768e-06	1.11001e-05	1.20229e-05	1.07887e-05	1.18815e-05	9.39316e-06	7.61247e-06	9.49069e-06	1.00413e-05	8.21461e-06	9.15451e-06	9.27471e-06	9.29084e-06	1.11841e-05	7.41682e-06	1.21476e-05
Deinobacterium	1.14095e-05	1.48456e-05	1.66296e-05	1.63255e-05	1.51631e-05	1.17925e-05	1.57102e-05	1.44753e-05	1.60256e-05	1.30105e-05	1.57574e-05	1.40586e-05	1.41633e-05	1.47243e-05	1.92157e-05	1.50105e-05	1.26786e-05	1.28196e-05	1.26178e-05	1.38624e-05	1.31237e-05	1.24083e-05	1.27022e-05	1.27687e-05
Deinococcus	0.000222198	0.000232016	0.000223494	0.000227524	0.000237508	0.000225776	0.000234718	0.000201498	0.00022865	0.00022761	0.000246251	0.000227203	0.000231471	0.000222646	0.000257891	0.000241615	0.000199605	0.000202888	0.000195057	0.000175094	0.000208404	0.000167383	0.000211735	0.000221004
Delepquintavirus	0	0	0	0	0	2.33878e-07	0	1.51569e-07	0	0	0	0	0	0	0	0	0	0	0	0	0	0	0	0
Delftia	4.03607e-05	5.17416e-05	3.74715e-05	3.88105e-05	3.06658e-05	3.05305e-05	2.96286e-05	6.93978e-05	6.04363e-05	2.79302e-05	3.1193e-05	2.64939e-05	3.19549e-05	2.25613e-05	2.69592e-05	2.71555e-05	3.24104e-05	3.6955e-05	3.83308e-05	3.36701e-05	2.45915e-05	2.01312e-05	2.62411e-05	3.4109e-05
Delitschia	8.44033e-08	2.92149e-08	0	1.94593e-07	2.52052e-08	0	5.69154e-08	5.55753e-08	0	3.07901e-07	0	7.77102e-08	2.59411e-08	3.61709e-07	5.35608e-07	5.47071e-07	7.21438e-08	5.96454e-07	8.36633e-08	1.54975e-07	0	7.11696e-07	1.70975e-07	1.06673e-07
Delphinella	0	0	0	5.67411e-07	0	0	0	3.70525e-07	0	0	0	1.90531e-07	8.9796e-08	3.48299e-07	0	3.74144e-07	0	0	4.91067e-07	0	0	3.63247e-07	0	0
Demequina	1.14873e-05	1.2019e-05	1.66538e-05	1.94426e-05	1.71581e-05	1.64798e-05	1.93021e-05	1.7094e-05	1.26115e-05	1.2817e-05	1.07669e-05	1.39376e-05	1.70265e-05	1.4986e-05	1.53424e-05	1.60968e-05	1.73249e-05	1.75099e-05	1.34635e-05	9.97258e-06	1.07953e-05	1.25946e-05	1.7985e-05	1.11697e-05
Demetria	1.09853e-06	6.61827e-07	2.68091e-06	1.44257e-06	1.17797e-06	2.55527e-06	1.37717e-06	1.67501e-06	7.09932e-07	1.69373e-06	7.93296e-07	1.56277e-06	4.18895e-07	9.19817e-07	1.99028e-06	1.99085e-06	5.68247e-07	6.70792e-07	4.48682e-07	4.44112e-07	9.04563e-07	3.71763e-07	2.49812e-06	2.12057e-06
Deminuibacter	4.45311e-05	5.52709e-05	6.75069e-05	5.4603e-05	6.74367e-05	7.41706e-05	5.85241e-05	6.03175e-05	3.01519e-05	3.64215e-05	3.60806e-05	3.21795e-05	4.98506e-05	4.24101e-05	4.44182e-05	4.92291e-05	3.37817e-05	2.50922e-05	2.56449e-05	2.95888e-05	3.81615e-05	3.07869e-05	3.11527e-05	3.64024e-05
Demosthenesvirus	0	0	5.96499e-08	0	0	0	0	0	4.73034e-07	0	6.02928e-08	0	3.28919e-07	0	0	1.75099e-07	0	0	0	0	0	0	1.12411e-07	0
Dendrosporobacter	9.96267e-07	5.88228e-07	6.35684e-07	1.55908e-06	1.57043e-06	8.52716e-07	1.09166e-06	1.77375e-06	2.17879e-06	1.32071e-06	3.69669e-07	1.53138e-06	8.72166e-07	7.67194e-07	1.35424e-06	1.0755e-06	1.3527e-07	4.30884e-07	2.10009e-06	1.2042e-06	1.67811e-06	8.53347e-07	7.96324e-07	1.74285e-06
Dendrothele	6.44308e-07	3.01219e-07	3.19553e-07	4.02215e-07	9.22056e-07	7.42111e-08	1.4162e-07	4.27208e-07	1.0123e-06	1.37745e-06	1.00872e-06	7.43433e-07	1.18722e-07	1.67279e-06	4.9208e-07	7.18486e-07	7.84877e-07	6.71262e-07	3.31995e-07	2.834e-06	3.01153e-07	3.09982e-06	1.69292e-06	6.84289e-07
Denitratisoma	3.70923e-05	3.75721e-05	4.40999e-05	3.47314e-05	3.56215e-05	3.39959e-05	3.77502e-05	3.24126e-05	3.90886e-05	3.85665e-05	3.91754e-05	3.70259e-05	3.69719e-05	3.13646e-05	3.5417e-05	3.73826e-05	3.18696e-05	2.82499e-05	2.62097e-05	3.14732e-05	3.16351e-05	2.78478e-05	2.98864e-05	3.42684e-05
Denitrobacterium	0	0	0	0	0	0	0	0	0	1.9984e-07	2.89869e-07	8.9433e-08	0	0	0	0	1.24864e-07	0	0	1.34113e-07	0	0	0	0
Denitrobaculum	1.71551e-05	1.45136e-05	1.45149e-05	1.93103e-05	1.19633e-05	1.21217e-05	1.48459e-05	1.62356e-05	1.85279e-05	1.62331e-05	2.27661e-05	2.00318e-05	1.5654e-05	1.19108e-05	1.41579e-05	1.37154e-05	2.0226e-05	1.97549e-05	1.79766e-05	1.28718e-05	1.26774e-05	9.83473e-06	1.05129e-05	1.21826e-05
Denitromonas	1.74229e-05	1.35992e-05	1.8123e-05	1.87195e-05	1.65204e-05	1.55334e-05	1.18685e-05	1.10636e-05	1.1205e-05	1.53612e-05	1.41311e-05	1.58319e-05	9.54091e-06	9.78781e-06	1.34873e-05	1.25091e-05	1.25411e-05	1.59732e-05	9.63394e-06	1.69536e-05	1.35954e-05	1.20464e-05	1.48402e-05	1.7168e-05
Denitrovibrio	1.37073e-06	2.46587e-06	9.70727e-07	1.55733e-06	7.27671e-07	1.73777e-06	1.38843e-06	1.09764e-06	1.64185e-06	1.40763e-06	5.16546e-07	1.37032e-06	1.93472e-06	9.94407e-07	1.36527e-06	1.01253e-06	3.67368e-07	2.32239e-06	4.78116e-07	8.69845e-07	2.97071e-07	4.26676e-07	1.00036e-06	1.05916e-06
Dentipellis	1.29171e-07	2.74366e-07	4.52981e-07	2.20491e-07	6.34611e-07	2.17707e-07	1.35607e-07	1.15223e-06	4.91584e-07	3.06405e-07	9.10168e-07	9.20039e-07	6.71225e-07	1.43216e-06	3.15477e-07	1.26526e-06	1.1482e-06	1.79037e-06	2.37661e-06	2.1503e-06	1.94457e-06	4.82459e-06	2.50271e-06	6.17601e-07
Dermabacter	0	1.94766e-07	1.84105e-07	6.25534e-07	2.95887e-07	4.20573e-07	2.26012e-07	3.70502e-07	4.07002e-07	5.01491e-07	2.38165e-07	7.52892e-08	1.01509e-07	3.11389e-07	3.0408e-07	1.95808e-07	1.41151e-07	7.42315e-07	2.98534e-07	0	2.48784e-07	0	0	5.98847e-07
Dermacoccus	2.01265e-06	4.33455e-06	2.45215e-06	3.92405e-06	3.03973e-06	6.11889e-06	4.25434e-06	6.13884e-06	3.37431e-06	4.59189e-06	2.52594e-06	2.83605e-06	3.34189e-06	2.5317e-06	3.06224e-06	5.2587e-06	1.77139e-06	1.53646e-06	1.58739e-06	1.94559e-06	2.87421e-06	1.91417e-06	3.48366e-06	2.2576e-06
Dermatophilus	0	9.98016e-07	7.12364e-07	7.202e-07	2.38521e-06	1.36428e-06	9.31191e-07	1.37607e-06	2.72109e-07	6.42774e-07	7.22257e-07	8.0531e-07	1.13173e-07	4.07754e-07	8.98317e-08	3.57352e-07	1.3527e-07	0	5.71876e-07	0	4.97173e-07	5.56979e-07	9.37692e-07	6.37413e-07
Derxia	3.53984e-05	3.42197e-05	3.98553e-05	3.59706e-05	3.64972e-05	3.24627e-05	3.84304e-05	3.91228e-05	3.91736e-05	3.28209e-05	3.54883e-05	3.11766e-05	3.07943e-05	2.36838e-05	3.64497e-05	2.64912e-05	3.0766e-05	3.71906e-05	3.54976e-05	2.8774e-05	3.01232e-05	2.54808e-05	3.63774e-05	3.58722e-05
Desertiactinospora	3.32109e-06	4.77872e-06	7.1728e-06	4.81098e-06	4.75914e-06	8.57729e-06	8.3835e-06	5.9363e-06	6.55392e-06	6.41662e-06	6.39493e-06	5.65481e-06	4.47506e-06	6.47952e-06	5.99298e-06	5.95491e-06	5.52233e-06	4.44081e-06	6.45939e-06	3.75208e-06	3.57367e-06	4.32442e-06	5.7796e-06	2.73353e-06
Desertifilum	1.86232e-05	2.2703e-05	1.88626e-05	2.13941e-05	1.88317e-05	1.93032e-05	2.14346e-05	1.86253e-05	1.68457e-05	1.86776e-05	1.79027e-05	2.07493e-05	1.73144e-05	1.94921e-05	2.12202e-05	1.90006e-05	1.6264e-05	1.60686e-05	1.80425e-05	1.48186e-05	1.73329e-05	1.79909e-05	1.7963e-05	1.67449e-05
Desertihabitans	1.11885e-06	2.57706e-06	1.96592e-06	1.58719e-06	4.27602e-06	3.71324e-06	3.43151e-06	6.0139e-06	2.67099e-06	2.41338e-06	3.7542e-06	4.00109e-06	3.90258e-06	1.9932e-06	1.4652e-06	2.76763e-06	2.1394e-06	1.86923e-06	3.50946e-06	1.01876e-06	2.67702e-06	1.70867e-06	3.1332e-06	2.49334e-06
Desertimonas	9.12017e-05	6.39874e-05	8.90412e-05	8.14255e-05	7.45031e-05	7.88345e-05	7.46914e-05	6.60603e-05	0.000126825	0.000113039	0.000124727	0.000124904	0.000114036	9.23969e-05	0.000120762	9.83933e-05	0.00012442	0.000102661	0.000116904	0.000101338	9.791e-05	7.84964e-05	7.76269e-05	9.09828e-05
Desmonostoc	0	3.82914e-07	0	2.93612e-07	0	0	0	1.78513e-07	1.75975e-07	1.36732e-07	6.61105e-08	4.41407e-07	2.58881e-07	2.86979e-07	5.69134e-07	2.69663e-07	0	0	0	0	7.74107e-08	2.1986e-07	7.59265e-08	0
Desmospora	1.71723e-06	1.89141e-06	1.13178e-06	1.22546e-06	2.27818e-06	2.00443e-06	1.45951e-06	1.80916e-06	2.70907e-06	2.36007e-06	2.25029e-06	2.03995e-06	2.21151e-06	2.50655e-06	1.92928e-06	1.31909e-06	7.41705e-07	1.38682e-06	2.68076e-06	2.22798e-06	1.89266e-06	2.14753e-06	1.33716e-06	1.86407e-06
Desnuesiella	6.67432e-07	3.494e-07	3.47393e-07	3.92373e-07	3.09575e-07	5.54258e-07	1.16788e-06	1.44857e-06	8.7992e-07	1.0228e-06	6.73836e-07	5.78151e-07	2.96063e-07	1.32669e-06	5.69974e-07	3.92426e-07	2.0835e-06	1.6577e-06	1.31996e-06	9.27039e-07	2.93342e-07	1.42964e-07	1.21533e-06	1.06159e-07
Desulfacinum	1.27548e-05	1.29009e-05	1.27298e-05	1.75066e-05	1.51009e-05	1.3832e-05	1.49935e-05	1.19647e-05	9.03484e-06	1.24789e-05	1.2688e-05	1.22439e-05	1.64154e-05	1.30994e-05	1.54505e-05	1.33861e-05	1.08481e-05	1.20697e-05	1.6265e-05	1.09856e-05	1.03796e-05	1.04275e-05	9.93811e-06	1.05088e-05
Desulfallas	8.10197e-06	7.6933e-06	1.22259e-05	1.0889e-05	1.05969e-05	1.13079e-05	1.02338e-05	1.05009e-05	9.94613e-06	9.73607e-06	1.07694e-05	8.88606e-06	1.37981e-05	9.72377e-06	1.14276e-05	9.92705e-06	1.29775e-05	1.01581e-05	9.38308e-06	8.26931e-06	1.18618e-05	1.19376e-05	1.06061e-05	1.03868e-05
Desulfamplus	2.01256e-06	1.8802e-06	1.01071e-06	2.19708e-06	8.8663e-07	8.99985e-07	7.94151e-07	1.88129e-06	1.98914e-06	1.85574e-06	1.33244e-06	3.29468e-06	9.65453e-07	1.48254e-06	2.02545e-06	1.53931e-06	8.11555e-07	3.50903e-06	3.51625e-06	1.92906e-06	1.73138e-06	1.69811e-06	2.3494e-06	3.01726e-06
Desulfarculus	4.56251e-06	6.12888e-06	5.15856e-06	6.15031e-06	9.06478e-06	8.95374e-06	7.72581e-06	5.08396e-06	6.64712e-06	5.75215e-06	7.46937e-06	6.87901e-06	8.11774e-06	5.24694e-06	7.88939e-06	5.6072e-06	9.6997e-06	9.09631e-06	9.80929e-06	9.16656e-06	9.23453e-06	4.72992e-06	5.36661e-06	9.69987e-06
Desulfatibacillum	8.8927e-06	9.82285e-06	1.08508e-05	1.12235e-05	9.07526e-06	9.76655e-06	9.1605e-06	1.02337e-05	7.58573e-06	8.96773e-06	9.16458e-06	7.90252e-06	8.62047e-06	5.72984e-06	8.69965e-06	8.62208e-06	6.84362e-06	6.26869e-06	7.14284e-06	4.89314e-06	9.31677e-06	6.3668e-06	6.08522e-06	7.8978e-06
Desulfatiglans	1.67907e-05	1.92441e-05	2.04021e-05	1.87953e-05	1.53214e-05	1.59527e-05	2.54854e-05	1.78292e-05	1.49586e-05	1.88017e-05	1.96816e-05	2.10949e-05	1.85832e-05	1.6902e-05	2.22693e-05	1.94217e-05	2.02097e-05	1.84644e-05	2.42437e-05	1.79981e-05	2.09824e-05	1.39774e-05	2.01598e-05	2.2008e-05
Desulfatirhabdium	1.31219e-05	1.09425e-05	1.06895e-05	1.2393e-05	1.24318e-05	8.62539e-06	1.10891e-05	9.17034e-06	1.1406e-05	1.00977e-05	1.14039e-05	1.11954e-05	1.33755e-05	9.90507e-06	1.44559e-05	1.18207e-05	1.14509e-05	1.15541e-05	1.31848e-05	1.06885e-05	1.26712e-05	1.03674e-05	1.29167e-05	1.26716e-05
Desulfatitalea	1.97771e-05	2.02171e-05	2.04736e-05	2.14715e-05	1.79863e-05	1.72567e-05	1.75977e-05	1.6047e-05	1.73821e-05	1.81415e-05	1.989e-05	1.83773e-05	2.02926e-05	1.65352e-05	1.86641e-05	1.97851e-05	1.83132e-05	1.98211e-05	1.90168e-05	1.56755e-05	2.18636e-05	1.67275e-05	1.94266e-05	2.23343e-05
Desulfitibacter	5.4748e-07	1.96964e-06	1.03369e-06	7.20597e-07	1.8059e-06	2.03149e-06	7.64427e-07	8.16757e-07	1.5809e-06	1.23999e-06	1.32961e-06	9.09625e-07	1.86482e-06	1.45122e-06	1.16255e-06	2.56638e-06	1.34336e-06	4.23134e-07	2.0338e-06	6.88769e-07	1.55267e-06	1.28142e-06	1.04305e-06	8.2921e-07
Desulfitobacterium	8.20673e-06	9.17071e-06	7.73673e-06	9.07104e-06	7.73837e-06	7.96499e-06	7.55794e-06	6.7863e-06	5.6228e-06	6.84139e-06	8.78157e-06	3.97558e-06	1.11494e-05	7.62322e-06	8.42834e-06	6.07984e-06	7.62486e-06	8.37668e-06	3.86202e-06	3.94606e-06	4.49605e-06	2.78912e-06	5.04057e-06	4.90565e-06
Desulfobacca	2.8253e-05	3.23996e-05	3.53354e-05	3.38238e-05	3.62602e-05	3.02139e-05	3.70816e-05	3.31333e-05	2.75867e-05	3.25253e-05	3.63083e-05	2.84483e-05	3.53436e-05	3.2318e-05	3.45761e-05	3.42598e-05	2.9618e-05	3.03664e-05	2.83268e-05	2.66344e-05	3.22131e-05	2.63965e-05	3.22517e-05	3.28614e-05
Desulfobacter	1.16725e-05	1.01854e-05	1.68193e-05	1.4906e-05	1.18407e-05	1.14203e-05	8.5085e-06	1.36829e-05	1.06339e-05	1.15883e-05	1.55546e-05	1.04941e-05	1.40468e-05	1.13832e-05	1.52733e-05	1.2793e-05	1.03803e-05	9.66534e-06	1.02685e-05	1.12559e-05	9.67451e-06	9.68506e-06	1.01221e-05	1.27821e-05
Desulfobacterium	2.83678e-05	2.90044e-05	2.83991e-05	3.24484e-05	2.65947e-05	2.9116e-05	2.71959e-05	2.9977e-05	2.58945e-05	2.66463e-05	2.56887e-05	2.55303e-05	2.75656e-05	2.7394e-05	2.41482e-05	3.79197e-05	2.44063e-05	2.32196e-05	2.49263e-05	2.18991e-05	2.51902e-05	2.35911e-05	2.41151e-05	1.9587e-05
Desulfobacula	7.84358e-06	8.26888e-06	7.04225e-06	9.26847e-06	7.21556e-06	6.38422e-06	7.3407e-06	8.51526e-06	1.03483e-05	8.45586e-06	8.4562e-06	8.85469e-06	9.2268e-06	7.24286e-06	8.07092e-06	7.89819e-06	9.62993e-06	5.45622e-06	6.27115e-06	6.1302e-06	7.28299e-06	6.97466e-06	7.77518e-06	6.80177e-06
Desulfobaculum	2.43821e-06	2.18044e-06	3.65583e-06	1.09134e-06	8.50805e-07	1.21469e-06	1.16077e-06	1.24824e-06	1.45407e-06	2.14738e-06	2.11597e-06	1.10791e-06	1.7854e-06	3.08791e-06	1.86816e-06	2.53107e-06	1.55663e-06	1.6518e-06	1.76951e-06	1.19473e-06	1.38329e-06	8.39827e-07	1.78245e-06	1.72419e-06
Desulfobotulus	1.77589e-06	3.77804e-06	1.98029e-06	2.58223e-06	2.45875e-06	3.92726e-06	4.02815e-06	2.86084e-06	1.64237e-06	1.84301e-06	1.69294e-06	1.88221e-06	1.98996e-06	1.688e-06	2.71015e-06	2.67861e-06	2.95657e-06	2.43383e-06	6.40512e-06	2.15809e-06	2.51522e-06	1.3557e-06	1.22589e-06	2.03688e-06
Desulfobulbus	3.0587e-05	2.78165e-05	3.52221e-05	3.07005e-05	2.74348e-05	2.78443e-05	3.04918e-05	2.66663e-05	3.10971e-05	3.39609e-05	3.68119e-05	2.96406e-05	3.36815e-05	2.57739e-05	3.19398e-05	3.22944e-05	3.43614e-05	3.01476e-05	2.90852e-05	3.18725e-05	3.81379e-05	2.73841e-05	3.1589e-05	3.04775e-05
Desulfocapsa	6.98872e-06	4.71829e-06	7.41429e-06	4.82013e-06	8.40324e-06	7.79074e-06	7.10922e-06	5.04801e-06	7.40577e-06	7.76297e-06	8.65817e-06	4.32927e-06	5.9833e-06	4.63304e-06	6.13464e-06	8.11456e-06	3.5323e-06	5.02525e-06	6.05189e-06	6.87066e-06	7.09052e-06	4.38761e-06	3.38638e-06	3.42585e-06
Desulfocarbo	3.74941e-06	3.5348e-06	5.62405e-06	4.17986e-06	5.4029e-06	5.53126e-06	4.96696e-06	4.67681e-06	3.73564e-06	4.7852e-06	6.67985e-06	4.1559e-06	2.35517e-06	3.50218e-06	4.26009e-06	4.95693e-06	6.52145e-06	7.51782e-06	7.35995e-06	4.49488e-06	5.7138e-06	2.3262e-06	4.21165e-06	3.37513e-06
Desulfococcus	1.82984e-05	1.66422e-05	1.91043e-05	2.02891e-05	1.72904e-05	1.39982e-05	1.80464e-05	1.55429e-05	1.84196e-05	1.72528e-05	1.46382e-05	1.68948e-05	1.99689e-05	1.33786e-05	1.85525e-05	1.74336e-05	1.68655e-05	2.2573e-05	1.98866e-05	1.57043e-05	1.20213e-05	1.28671e-05	1.73337e-05	1.81588e-05
Desulfocucumis	4.18146e-07	1.17357e-06	6.52231e-07	1.22819e-06	9.51157e-07	1.63889e-06	1.55199e-06	7.51987e-07	1.89059e-06	1.97308e-06	2.29437e-06	8.01777e-07	6.24795e-07	8.5462e-07	2.02453e-06	2.06688e-06	1.17796e-06	1.62981e-06	1.42292e-06	1.49381e-06	8.10661e-07	2.69409e-07	1.72854e-06	4.73327e-07
Desulfocurvibacter	9.08805e-06	9.35413e-06	7.00377e-06	6.67176e-06	8.66423e-06	8.52411e-06	8.15527e-06	9.86896e-06	8.19368e-06	6.73347e-06	7.51316e-06	7.90182e-06	8.80447e-06	1.01083e-05	1.03949e-05	1.06611e-05	9.53974e-06	8.76778e-06	6.58164e-06	5.21398e-06	6.727e-06	5.67264e-06	6.54573e-06	6.72821e-06
Desulfocurvus	2.5014e-06	4.40365e-06	2.35459e-06	2.1876e-06	3.55673e-06	4.19622e-06	4.11143e-06	2.20639e-06	2.58519e-06	3.11252e-06	3.25103e-06	2.04305e-06	3.27336e-06	3.21987e-06	3.75712e-06	2.92356e-06	1.90551e-06	3.54618e-06	3.33849e-06	2.44745e-06	2.8937e-06	3.24197e-06	2.50636e-06	1.84642e-06
Desulfofarcimen	3.49805e-06	1.63296e-06	2.84031e-06	3.31468e-06	2.8861e-06	1.90631e-06	1.81275e-06	2.76113e-06	4.04676e-06	3.72842e-06	2.73551e-06	1.92816e-06	2.58452e-06	3.02721e-06	2.15314e-06	2.8284e-06	1.79614e-06	3.10775e-06	1.61847e-06	1.37827e-06	2.32141e-06	2.52763e-06	2.62211e-06	2.04583e-06
Desulfofundulus	7.77487e-06	1.20271e-05	8.66302e-06	7.4274e-06	8.74889e-06	1.01221e-05	9.57979e-06	1.12891e-05	8.30626e-06	7.87579e-06	1.16275e-05	9.27391e-06	1.08378e-05	1.11652e-05	1.01021e-05	1.14236e-05	1.32624e-05	1.54995e-05	1.39115e-05	1.39095e-05	1.4367e-05	1.10934e-05	9.72724e-06	1.27563e-05
Desulfofustis	5.27086e-06	4.21764e-06	4.47142e-06	4.94854e-06	5.35853e-06	5.21262e-06	7.36223e-06	4.53271e-06	4.35511e-06	4.86718e-06	4.56471e-06	3.85997e-06	3.91485e-06	4.09857e-06	5.09511e-06	6.80259e-06	3.71332e-06	6.18078e-06	9.91017e-06	6.73477e-06	4.6745e-06	2.92665e-06	4.7133e-06	2.76937e-06
Desulfoglaeba	3.73078e-06	3.72211e-06	4.40743e-06	5.25349e-06	2.75482e-06	2.80931e-06	4.09822e-06	5.2015e-06	5.94379e-06	5.31817e-06	5.08273e-06	4.89295e-06	4.5238e-06	4.90568e-06	5.30306e-06	5.62441e-06	3.43615e-06	2.71756e-06	4.5873e-06	3.95717e-06	5.61347e-06	4.46179e-06	2.72138e-06	3.28873e-06
Desulfohalobium	2.52383e-06	1.21626e-06	1.42242e-06	2.29968e-06	4.29591e-07	6.87421e-07	8.62514e-07	7.00174e-07	1.10631e-06	1.67838e-06	1.72876e-06	1.72137e-06	1.38952e-06	1.261e-06	1.36247e-06	1.10442e-06	8.49354e-07	1.47962e-06	2.56338e-07	2.66671e-06	7.59659e-07	1.33481e-07	5.00259e-07	8.01695e-07
Desulfohalotomaculum	4.00934e-07	4.91586e-07	7.5925e-07	7.9762e-07	6.61637e-07	3.90845e-07	7.39775e-07	1.16936e-06	8.14728e-07	1.78742e-07	1.67742e-06	3.60055e-07	6.56149e-07	1.35437e-06	1.04879e-06	4.82572e-07	1.68152e-06	6.29952e-07	8.42876e-07	2.90245e-07	0	2.14223e-07	4.46909e-07	7.31957e-07
Desulfohalovibrio	3.16648e-06	2.94297e-06	4.4632e-06	5.86282e-06	3.95853e-06	4.19561e-06	3.33839e-06	3.24543e-06	3.8118e-06	4.19907e-06	3.39329e-06	4.36916e-06	5.28736e-06	3.87331e-06	6.36941e-06	5.70376e-06	4.84679e-06	5.22411e-06	4.57989e-06	4.13217e-06	2.98285e-06	5.34387e-06	1.9809e-06	3.90881e-06
Desulfoluna	2.84928e-06	4.56208e-06	3.17346e-06	3.08773e-06	4.97759e-06	6.00103e-06	3.59507e-06	5.93872e-06	3.46433e-06	3.50327e-06	5.87258e-06	4.84037e-06	6.26447e-06	4.58061e-06	4.99129e-06	5.90313e-06	3.50386e-06	5.85529e-06	6.64393e-06	2.49715e-06	3.32193e-06	2.58954e-06	5.54569e-06	3.74129e-06
Desulfomicrobium	7.45627e-06	6.37233e-06	1.09735e-05	1.02317e-05	1.10795e-05	7.45163e-06	9.85408e-06	1.07287e-05	9.61156e-06	1.13138e-05	1.16523e-05	1.03663e-05	9.21674e-06	8.16918e-06	1.16556e-05	9.5296e-06	1.13051e-05	1.0053e-05	8.79037e-06	1.17817e-05	9.40425e-06	8.3341e-06	9.60825e-06	1.30727e-05
Desulfomonile	1.5184e-05	2.43769e-05	1.7396e-05	2.70455e-05	1.9811e-05	1.85071e-05	1.79274e-05	1.50004e-05	1.35981e-05	1.45965e-05	1.85166e-05	1.65355e-05	1.77025e-05	1.4905e-05	1.58126e-05	1.8157e-05	1.36496e-05	1.17886e-05	1.59325e-05	1.15766e-05	1.62008e-05	1.07593e-05	1.53576e-05	1.50759e-05
Desulfonatronospira	1.14945e-06	1.75433e-06	1.27733e-06	1.57024e-06	1.80939e-06	1.78949e-06	2.56631e-06	2.70712e-06	2.25555e-06	7.72482e-07	7.08277e-07	1.32228e-06	1.78229e-06	9.30715e-07	1.96006e-06	7.57348e-07	9.66937e-07	7.73465e-07	2.2444e-06	1.14489e-06	4.71809e-07	1.52708e-06	1.29877e-06	4.89708e-07
Desulfonatronovibrio	2.49459e-06	2.65984e-06	4.86795e-06	1.61785e-06	2.40858e-06	3.13599e-06	3.08726e-06	2.74919e-06	1.93787e-06	2.56954e-06	1.33195e-06	8.6929e-07	2.75989e-06	3.40055e-06	2.64161e-06	9.38386e-07	1.19758e-06	2.30316e-06	0	2.74977e-06	2.49311e-06	2.31787e-06	2.57255e-06	3.04187e-06
Desulfonatronum	1.29367e-05	1.39224e-05	1.46388e-05	1.56506e-05	1.51063e-05	1.88665e-05	1.55119e-05	1.3828e-05	1.29184e-05	1.55096e-05	1.31537e-05	1.36003e-05	1.39864e-05	1.52656e-05	1.61867e-05	1.5111e-05	1.28816e-05	1.48268e-05	1.65273e-05	1.3703e-05	1.22667e-05	1.32251e-05	1.12054e-05	1.19589e-05
Desulfonauticus	1.49766e-05	1.28694e-05	1.29328e-05	1.27762e-05	1.36675e-05	1.71701e-05	1.17469e-05	1.08741e-05	1.202e-05	1.27877e-05	1.47603e-05	1.38365e-05	1.09479e-05	1.30322e-05	1.30956e-05	1.2846e-05	1.45837e-05	1.34469e-05	1.32514e-05	1.41787e-05	1.84315e-05	1.42773e-05	1.41831e-05	1.65802e-05
Desulfonema	3.88617e-06	5.67789e-06	5.19293e-06	7.63928e-06	4.13794e-06	5.30179e-06	6.76458e-06	3.99643e-06	4.85206e-06	6.76283e-06	5.13755e-06	5.45296e-06	6.37202e-06	5.71924e-06	5.61089e-06	4.92714e-06	7.71843e-06	9.77579e-06	1.04172e-05	5.93234e-06	5.95733e-06	4.58921e-06	4.47578e-06	4.44111e-06
Desulfonispora	0	0	7.10118e-08	3.78274e-07	8.83819e-08	7.35044e-08	2.0253e-07	0	0	0	0	6.6436e-08	0	0	0	0	0	1.4654e-07	1.48572e-06	0	5.34838e-07	0	3.37232e-07	0
Desulfopila	2.01377e-05	1.65932e-05	1.54864e-05	1.98451e-05	1.5988e-05	1.7894e-05	1.55807e-05	1.79772e-05	2.06533e-05	1.83336e-05	2.14101e-05	2.11965e-05	1.77258e-05	1.72051e-05	2.14406e-05	1.67945e-05	1.74467e-05	1.55601e-05	1.72232e-05	1.45019e-05	1.57499e-05	1.41685e-05	1.33313e-05	1.73155e-05
Desulfoplanes	5.53176e-07	4.91846e-07	3.82565e-07	3.04511e-07	2.87997e-07	9.76957e-08	3.11896e-07	0	6.94983e-07	5.45554e-07	6.12082e-07	1.12082e-06	9.33879e-08	8.59726e-08	4.4554e-07	8.20324e-07	8.41678e-07	9.52802e-07	1.42469e-06	7.86218e-07	5.25812e-07	1.05756e-07	3.34538e-07	9.18119e-07
Desulfoprunum	1.90326e-06	3.15408e-06	2.53254e-06	2.77705e-06	1.83022e-06	2.07245e-06	2.54056e-06	2.70208e-06	2.57657e-06	2.03941e-06	3.65342e-06	1.247e-06	2.60713e-06	1.15786e-06	2.50102e-06	2.52822e-06	1.44536e-06	2.41912e-06	8.54283e-07	1.59781e-06	1.4602e-06	1.09238e-06	3.22572e-06	1.70742e-06
Desulforegula	2.14064e-06	2.67138e-06	2.90606e-06	2.87769e-06	3.63295e-06	3.53332e-06	2.83123e-06	2.00967e-06	3.12938e-06	1.21231e-06	2.96131e-06	1.94889e-06	3.41838e-06	1.00462e-06	3.53813e-06	1.91955e-06	7.40937e-07	1.31531e-06	2.58081e-06	1.21345e-06	1.08809e-06	8.95513e-07	2.38179e-06	2.21536e-06
Desulforhopalus	4.9932e-06	6.38018e-06	5.2095e-06	6.68199e-06	4.75917e-06	4.38029e-06	5.71511e-06	6.76928e-06	6.13439e-06	4.01047e-06	6.86679e-06	5.62809e-06	5.58954e-06	5.53859e-06	5.14098e-06	6.27092e-06	7.64517e-06	5.44333e-06	1.11754e-05	1.10941e-05	8.99143e-06	8.44659e-06	6.03007e-06	8.51728e-06
Desulfosalsimonas	1.9039e-06	1.19964e-06	1.94658e-06	3.64942e-06	1.98555e-06	1.41073e-06	2.96037e-06	1.58694e-06	1.16778e-06	1.86e-06	2.62292e-06	1.55727e-06	2.8425e-06	1.74772e-06	2.06527e-06	1.70839e-06	1.6328e-06	1.0836e-06	3.5407e-06	1.51069e-06	2.2837e-06	9.87536e-07	2.39081e-06	1.73872e-06
Desulfosarcina	2.56861e-05	2.94966e-05	2.6261e-05	3.69467e-05	2.81194e-05	2.52492e-05	2.78806e-05	2.43703e-05	2.65875e-05	2.80402e-05	3.12341e-05	3.19156e-05	3.34405e-05	2.53349e-05	3.21635e-05	2.83091e-05	2.86514e-05	2.71045e-05	3.09812e-05	2.8229e-05	2.72341e-05	2.41698e-05	2.45874e-05	3.04845e-05
Desulfosoma	9.56729e-07	1.14207e-06	1.92472e-06	2.89009e-06	2.46988e-06	1.65084e-06	1.26322e-06	1.47592e-06	2.05379e-06	1.73712e-06	2.32168e-06	1.25098e-06	2.13912e-06	1.81071e-06	2.56309e-06	2.76924e-06	1.40442e-06	1.22985e-06	2.10388e-06	1.28013e-06	1.62925e-06	1.17084e-06	7.52699e-07	1.1416e-06
Desulfospira	7.42723e-07	1.23467e-06	1.27642e-06	2.19891e-06	1.74432e-06	2.6178e-06	1.53071e-06	1.75932e-06	1.32145e-06	1.51609e-06	1.04785e-06	2.375e-07	1.406e-06	1.1426e-06	1.20913e-06	5.83221e-07	1.03768e-06	1.5232e-06	7.71544e-07	7.2087e-07	1.56997e-06	1.50334e-06	3.61648e-07	1.42762e-06
Desulfosporosinus	2.55617e-05	2.67341e-05	2.55532e-05	2.61932e-05	3.04219e-05	2.89635e-05	2.8828e-05	2.81947e-05	2.18413e-05	2.18726e-05	2.84591e-05	2.25497e-05	2.70266e-05	2.38499e-05	2.68239e-05	2.41464e-05	2.5878e-05	1.58693e-05	1.86516e-05	2.2224e-05	2.32953e-05	2.0943e-05	2.14109e-05	2.31634e-05
Desulfotalea	2.39772e-06	1.13638e-06	1.36106e-06	2.12389e-06	1.29432e-06	5.26853e-07	1.23044e-06	2.09514e-06	1.58332e-06	9.53778e-07	1.20814e-06	9.35267e-07	2.96151e-06	7.05552e-07	2.36947e-06	6.80917e-07	2.41203e-06	1.25201e-06	1.67772e-06	1.6306e-06	1.0552e-06	1.36437e-06	8.96451e-07	1.07736e-06
Desulfothermus	4.04673e-07	1.11936e-06	5.69824e-07	2.49529e-07	6.07626e-08	1.80005e-07	0	2.8312e-07	1.62535e-06	1.43113e-07	7.11657e-07	2.33061e-07	9.51169e-07	6.06414e-08	2.99641e-07	1.60347e-07	4.34795e-08	3.37903e-07	2.57085e-07	9.34003e-08	1.31986e-06	9.53178e-07	6.73979e-07	5.44574e-07
Desulfotignum	4.54143e-06	3.66323e-06	2.98316e-06	4.18618e-06	2.52804e-06	2.51565e-06	1.98137e-06	5.05722e-06	2.5678e-06	3.19981e-06	4.35557e-06	2.8067e-06	3.29658e-06	3.33949e-06	2.0157e-06	3.1546e-06	2.93037e-06	2.70606e-06	4.0877e-06	2.46831e-06	1.70035e-06	2.19428e-06	2.67172e-06	4.27528e-06
Desulfotomaculum	2.75307e-05	3.16674e-05	2.73103e-05	3.33467e-05	2.99699e-05	2.95191e-05	2.27658e-05	3.06092e-05	2.41976e-05	2.79844e-05	2.93337e-05	2.71607e-05	2.74636e-05	2.68125e-05	3.02501e-05	2.7618e-05	2.81075e-05	2.57208e-05	2.7499e-05	2.53588e-05	2.93279e-05	2.48483e-05	2.44192e-05	2.87535e-05
Desulfovermiculus	1.23088e-06	3.67115e-06	2.40579e-06	2.71621e-06	2.4558e-06	1.97135e-06	1.09714e-06	1.22137e-06	1.76894e-06	1.7085e-06	4.24195e-07	9.99719e-07	2.14424e-06	1.32507e-06	2.19967e-06	2.18538e-06	2.26485e-06	6.02219e-07	8.63796e-07	1.42112e-06	9.85892e-07	1.46939e-06	6.61183e-07	1.31536e-06
Desulfovibrio	0.000110474	0.000115053	0.000124115	0.000125872	0.000125188	0.000116245	0.000123913	0.000119659	0.000106577	0.000107618	0.000107865	0.000110625	0.000119415	0.000106949	0.000116089	0.000118195	0.000100235	0.000110775	0.000103761	0.00010097	0.000100624	8.78061e-05	9.61964e-05	9.58669e-05
Desulfovirgula	3.65866e-06	4.01476e-06	4.31978e-06	3.81979e-06	1.99268e-06	3.82228e-06	3.67364e-06	2.17754e-06	2.98861e-06	3.80403e-06	4.12623e-06	3.36244e-06	3.4864e-06	3.37314e-06	2.39646e-06	4.24335e-06	3.95082e-06	2.31984e-06	3.53039e-06	4.81134e-06	1.9958e-06	2.55069e-06	2.06611e-06	2.2098e-06
Desulfurella	3.31127e-07	9.39051e-08	1.97516e-07	4.47375e-07	4.83892e-07	9.52802e-07	3.61469e-07	1.58997e-07	6.93615e-08	5.4318e-07	1.20136e-06	3.97802e-07	9.156e-07	7.97021e-07	5.79839e-07	3.9122e-07	7.52953e-07	9.66175e-07	1.49762e-06	1.01837e-06	3.57763e-07	3.05659e-07	3.35532e-07	4.40448e-07
Desulfuribacillus	4.12527e-07	7.83598e-07	1.20262e-07	1.24243e-07	1.14922e-06	1.82953e-07	0	5.32548e-07	5.91533e-07	8.10081e-07	5.88753e-07	1.3875e-07	8.89599e-07	8.51812e-07	3.66955e-07	3.61175e-07	8.11618e-07	9.08954e-07	7.80652e-07	8.15401e-07	3.71579e-07	9.28299e-08	8.14869e-07	8.90233e-08
Desulfurispira	5.94538e-07	4.58666e-07	6.60679e-07	9.57012e-07	9.10371e-07	1.95391e-07	4.01475e-07	5.87488e-07	1.19465e-06	1.9984e-07	1.22114e-06	8.42573e-07	1.13934e-06	9.19916e-07	1.79526e-06	1.69184e-06	8.85663e-07	4.33984e-07	3.43642e-07	7.1328e-07	1.47779e-07	7.62781e-07	1.05117e-06	1.80223e-06
Desulfurispirillum	1.60235e-06	1.46992e-06	1.28397e-06	2.21402e-06	1.61116e-06	9.02329e-07	5.06669e-07	1.43285e-06	4.62224e-07	1.90654e-07	4.93132e-07	7.50572e-07	9.18683e-07	9.12583e-07	1.3045e-06	3.49615e-07	1.09532e-06	6.72434e-07	8.54464e-07	2.49191e-07	5.81205e-07	6.8169e-07	1.25121e-06	7.22487e-07
Desulfurispora	4.13434e-06	2.84342e-06	3.71881e-06	3.63669e-06	2.78948e-06	3.17921e-06	5.83623e-06	3.23874e-06	3.17746e-06	2.73121e-06	3.79779e-06	4.69743e-06	4.69211e-06	3.04136e-06	3.66453e-06	2.59145e-06	3.48667e-06	2.41414e-06	2.37443e-06	2.00992e-06	3.79024e-06	3.51713e-06	4.11292e-06	5.12069e-06
Desulfurivibrio	5.74794e-06	1.18688e-05	1.15478e-05	8.6015e-06	8.5028e-06	6.21418e-06	7.43075e-06	8.96515e-06	9.66481e-06	6.75985e-06	8.1784e-06	9.85416e-06	9.30987e-06	9.01326e-06	9.10951e-06	1.07541e-05	1.19324e-05	8.72199e-06	1.01751e-05	7.68339e-06	6.841e-06	6.26602e-06	7.47647e-06	5.80318e-06
Desulfurobacterium	4.12978e-06	1.99976e-06	2.69019e-06	4.19234e-06	2.69826e-06	2.48341e-06	3.9577e-06	1.64567e-06	2.02003e-06	4.50919e-06	2.76547e-06	2.67149e-06	3.87855e-06	3.53285e-06	3.60131e-06	4.20018e-06	2.84923e-06	9.18516e-07	4.12216e-06	1.58084e-06	4.07178e-06	1.95762e-06	3.56257e-06	3.11655e-06
Desulfurococcus	0	0	0	0	0	0	0	0	0	0	0	2.61592e-07	0	0	0	0	4.23453e-07	0	0	0	0	1.21082e-07	0	0
Desulfuromonas	8.47116e-05	8.50736e-05	8.22663e-05	8.47247e-05	7.17168e-05	7.55642e-05	8.15368e-05	7.15019e-05	7.58852e-05	7.52436e-05	7.89314e-05	7.59064e-05	8.88686e-05	6.49525e-05	8.43231e-05	9.04729e-05	7.57595e-05	6.97017e-05	7.65399e-05	6.53801e-05	7.34606e-05	5.6294e-05	6.55857e-05	7.30135e-05
Desulfuromusa	1.9481e-06	1.48218e-06	2.89231e-06	2.67971e-06	2.22025e-06	6.43672e-07	1.90402e-06	6.47179e-07	2.29335e-06	1.05841e-06	1.83326e-06	1.44403e-06	1.26738e-06	2.12104e-06	2.17897e-06	2.3989e-06	1.28031e-06	4.80503e-07	5.26928e-07	4.67767e-07	1.47819e-06	1.8128e-06	1.67543e-06	1.6684e-06
Dethiobacter	1.71799e-06	9.99244e-07	1.91914e-06	3.17773e-06	2.05523e-06	2.79074e-06	1.46565e-06	1.74686e-06	9.91129e-07	1.28729e-06	1.69927e-06	1.26215e-06	2.8517e-06	1.95171e-06	2.7499e-06	2.48332e-06	1.47064e-06	1.05377e-06	1.91008e-06	1.17766e-06	2.58295e-06	1.8109e-06	2.43579e-06	2.95962e-06
Dethiosulfatarculus	1.63961e-06	1.13742e-06	1.66437e-06	2.37086e-06	2.24538e-06	1.24273e-06	1.78731e-06	2.03199e-06	1.57136e-06	3.66019e-07	3.64279e-06	1.11335e-06	1.87202e-06	1.67107e-06	2.47603e-06	2.33914e-06	1.70071e-06	2.76213e-06	3.36625e-06	2.88196e-06	3.42299e-07	2.76475e-06	1.97523e-06	1.12014e-06
Dethiosulfatibacter	3.67299e-07	8.00378e-07	0	3.32586e-07	8.10517e-07	9.79815e-07	4.30264e-07	2.98244e-07	4.43891e-07	0	7.04311e-07	3.62478e-07	2.8395e-07	5.38971e-07	0	1.44472e-07	0	1.23995e-07	1.24116e-07	2.86598e-07	1.93952e-07	9.18098e-08	1.90233e-07	0
Dethiosulfovibrio	0	3.50322e-07	2.07118e-07	1.67987e-07	7.52272e-07	9.80266e-07	5.10151e-07	9.7679e-07	1.06932e-07	2.1501e-07	4.6715e-07	9.63941e-07	6.9825e-07	4.10174e-07	1.98259e-07	7.63218e-07	1.34714e-06	6.22804e-07	6.23177e-07	2.90579e-07	8.79848e-07	4.6804e-07	5.99438e-07	8.07558e-07
Detrevirus	0	0	0	0	0	0	0	4.41333e-07	0	0	0	0	0	0	0	0	0	0	0	0	0	0	0	0
Devosia	0.000158626	0.000204613	0.000183542	0.000237936	0.000275763	0.000270701	0.000278517	0.000288462	0.000248173	0.000237797	0.000208732	0.000219099	0.000272559	0.000220732	0.00022521	0.000234776	0.000351533	0.000350296	0.000255273	0.000262036	0.000170772	0.000127965	0.000187711	0.000227404
Devriesea	3.20576e-07	1.35113e-06	1.75162e-06	9.67158e-07	1.14166e-06	4.14473e-07	4.16823e-07	5.89128e-07	5.78943e-07	7.55708e-07	1.06207e-06	2.35763e-07	3.24836e-07	1.92449e-07	5.74681e-07	6.28968e-07	5.48783e-07	1.09239e-06	5.00292e-07	2.13486e-07	7.53325e-07	1.3718e-06	5.3029e-07	1.07251e-06
Dialister	8.63514e-07	1.69714e-06	1.69947e-06	9.37376e-07	1.85503e-06	1.05797e-06	7.1418e-07	1.56163e-06	1.01159e-06	1.03689e-06	1.38573e-06	1.19798e-06	1.20103e-06	6.15785e-07	1.34794e-06	1.59303e-06	1.08619e-06	1.05139e-06	1.80789e-07	6.54137e-07	7.39431e-07	4.25496e-07	6.91621e-07	1.52033e-06
Diaminobutyricibacter	4.44327e-06	4.46659e-06	3.30907e-06	4.33961e-06	6.75528e-06	4.26657e-06	4.61546e-06	6.44524e-06	2.93947e-06	3.71293e-06	3.04971e-06	2.98788e-06	6.2823e-06	4.80064e-06	5.22023e-06	7.26519e-06	3.19377e-06	1.04475e-06	1.39774e-06	8.06566e-07	2.24833e-06	2.92439e-06	3.54959e-06	2.66787e-06
Diaminobutyricimonas	1.78151e-06	1.95461e-06	3.86243e-06	3.69272e-06	3.97436e-06	3.65131e-06	2.34665e-06	4.89857e-06	1.97161e-06	2.69985e-06	3.01973e-06	2.28937e-06	4.18107e-06	3.77892e-06	2.5839e-06	3.1665e-06	2.43069e-06	1.79023e-06	1.94906e-06	2.97304e-06	4.63303e-07	2.62189e-06	2.25896e-06	2.60231e-06
Diaphorobacter	2.6383e-05	2.59358e-05	2.52725e-05	2.45006e-05	1.93761e-05	1.98519e-05	2.26844e-05	2.33821e-05	3.8398e-05	1.88647e-05	2.1914e-05	2.12717e-05	2.06775e-05	1.65506e-05	1.83427e-05	1.89318e-05	2.18602e-05	2.34348e-05	1.88909e-05	2.07751e-05	1.89052e-05	1.47803e-05	2.4236e-05	2.25074e-05
Diaporthe	7.94562e-08	1.11348e-07	2.3288e-07	3.97353e-07	4.32667e-07	7.42111e-08	3.52647e-07	8.2416e-07	8.71447e-07	5.12167e-07	7.92073e-07	1.30858e-06	5.833e-07	1.39034e-06	2.2509e-07	8.46064e-07	1.7619e-06	1.8385e-06	3.36823e-06	1.29021e-06	8.6851e-07	1.9813e-06	3.08424e-06	9.28347e-07
Dichelobacter	2.24439e-07	5.84298e-07	0	3.12746e-07	0	0	0	3.00107e-07	1.02655e-07	3.1175e-07	0	0	0	9.17816e-08	9.58205e-08	2.95776e-07	0	0	0	0	0	0	0	0
Dichomitus	6.88203e-08	3.57912e-07	3.09966e-07	9.93458e-07	0	1.07832e-07	1.40372e-07	1.18152e-07	3.79214e-07	4.771e-07	8.67711e-07	1.94358e-07	2.75979e-07	1.48372e-07	0	3.31723e-07	8.10454e-07	2.71933e-07	0	2.17621e-07	1.58867e-07	5.09432e-08	2.32845e-07	3.42877e-07
Dichotomicrobium	1.14476e-05	6.29666e-06	5.04357e-06	6.08855e-05	2.10748e-06	2.448e-06	6.92194e-06	2.74657e-06	7.89024e-06	5.22554e-06	5.87891e-05	3.74273e-06	1.35829e-05	4.21074e-06	4.58322e-06	4.46602e-06	2.19552e-05	4.4234e-05	2.60392e-05	1.47937e-05	1.1759e-05	8.21454e-06	4.8568e-06	1.06534e-05
Dickeya	9.10598e-06	1.01797e-05	1.63606e-05	7.35637e-06	1.86023e-05	1.23122e-05	1.23892e-05	3.91402e-05	4.70034e-05	7.69669e-05	2.44007e-05	8.72337e-05	5.05373e-05	0.000157612	4.19322e-05	4.79928e-05	7.32e-05	9.3446e-05	0.000117817	0.000184704	5.09549e-05	0.000270131	0.000179744	7.11015e-05
Dictyobacter	0.000334852	0.000507309	0.000248238	0.000505684	0.000489218	0.000563935	0.000799478	0.000495997	0.000239432	0.000298492	0.000249127	0.000248654	0.000455697	0.000532842	0.000404456	0.000445791	0.000107691	9.64225e-05	9.55835e-05	0.000105344	0.000156054	0.000123231	0.000148348	0.000146001
Dictyoglomus	4.29183e-06	4.79104e-06	4.64095e-06	5.26392e-06	4.31104e-06	5.32073e-06	4.98075e-06	4.6429e-06	5.60349e-06	5.89748e-06	6.24641e-06	4.68987e-06	5.53631e-06	5.15517e-06	5.01868e-06	4.99432e-06	1.51837e-06	2.52633e-06	4.52932e-06	2.14401e-06	2.57474e-06	2.34734e-06	3.02183e-06	4.15488e-06
Didymella	1.22669e-06	8.85673e-07	1.11711e-06	1.32718e-06	1.82392e-06	1.18816e-06	2.55742e-05	1.68366e-06	8.84365e-07	6.27871e-07	1.12442e-06	3.51906e-07	1.35367e-06	1.37643e-06	1.41851e-06	1.03446e-06	3.38762e-07	1.06449e-07	1.96427e-07	1.03573e-07	1.03821e-07	5.34791e-07	9.72541e-08	2.26782e-07
Didymosphaeria	0	0	7.53155e-08	6.68551e-08	5.98578e-08	6.01075e-07	1.13831e-07	4.00964e-07	0	1.13777e-07	2.862e-07	4.05131e-07	1.36605e-07	2.40342e-07	5.7462e-07	2.13016e-07	7.10906e-08	0	0	0	0	2.53172e-07	0	0
Dielma	2.42783e-07	0	0	1.1033e-07	0	0	0	0	0	0	0	0	0	0	0	0	0	4.70149e-07	4.18316e-07	2.90579e-07	9.80536e-07	0	0	6.66705e-07
Dietzia	4.07099e-06	6.75651e-06	4.62797e-06	6.43912e-06	8.77695e-06	9.70017e-06	8.96905e-06	7.48302e-06	7.30294e-06	8.82951e-06	7.00878e-06	7.66811e-06	6.1031e-06	5.36315e-06	7.17892e-06	7.15405e-06	5.15618e-06	4.17492e-06	5.45814e-06	4.25006e-06	6.97996e-06	4.82099e-06	4.79419e-06	1.02336e-05
Dimargaris	8.91855e-08	1.94766e-07	2.33007e-07	4.12663e-07	3.40367e-07	0	2.88793e-07	1.1244e-06	1.79094e-06	1.91352e-06	1.13505e-06	1.51308e-06	9.43504e-07	3.02251e-06	9.59312e-07	6.72106e-07	1.41598e-06	2.22174e-06	3.11834e-06	2.56219e-06	1.77075e-06	6.08089e-06	3.46393e-06	2.56503e-06
Dinghuibacter	3.1353e-05	7.3434e-05	4.46033e-05	4.33495e-05	8.9219e-05	8.12211e-05	7.37663e-05	8.38439e-05	2.16728e-05	2.22244e-05	2.0137e-05	2.27086e-05	3.11289e-05	3.2768e-05	3.10365e-05	5.03907e-05	2.61227e-05	2.27479e-05	2.19416e-05	1.84176e-05	2.78686e-05	1.84173e-05	2.39948e-05	2.64942e-05
Dinoroseobacter	2.35905e-06	1.23461e-06	1.51146e-06	2.27817e-06	1.8163e-06	1.6647e-06	2.19601e-06	1.82105e-06	2.9856e-06	1.95229e-06	1.83035e-06	2.27928e-06	3.27173e-06	2.89521e-06	1.89397e-06	1.59473e-06	4.14185e-07	1.42917e-06	2.05941e-06	2.06238e-07	6.27933e-07	8.11185e-07	5.89349e-07	3.86855e-07
Diplocarpon	0	0	0	0	0	0	0	0	0	0	0	1.5854e-07	0	7.718e-08	0	3.31628e-07	0	0	0	0	0	3.79759e-07	0	0
Diplodia	1.28532e-07	0	0	0	0	0	0	7.57845e-08	0	0	3.96663e-07	6.45905e-08	7.07484e-08	8.01533e-07	0	0	2.95134e-07	1.04478e-07	4.3832e-07	9.19146e-07	0	2.48243e-07	8.74305e-08	0
Diplorickettsia	0	0	0	0	0	0	0	0	0	6.83662e-08	3.96663e-07	3.03295e-07	0	0	2.76405e-07	2.35349e-07	0	0	0	0	0	0	0	0
Dismasvirus	0	0	3.13162e-07	0	0	0	0	0	0	0	0	0	0	0	0	0	0	0	0	0	0	0	0	0
Dissoconium	0	0	0	0	0	0	0	0	0	1.16325e-07	0	0	3.63849e-07	0	0	0	0	0	5.30701e-07	3.12264e-07	0	6.23484e-07	5.09154e-07	0
Dissulfuribacter	2.45732e-06	2.93363e-06	2.41666e-06	2.99303e-06	4.15025e-06	3.34473e-06	1.78856e-06	1.0303e-06	7.98208e-07	2.96608e-06	2.26249e-06	7.66828e-07	1.87773e-06	2.2895e-06	1.11617e-06	2.25864e-06	1.20173e-06	7.68629e-07	1.709e-06	9.08643e-07	1.70871e-06	1.8185e-06	1.76049e-06	3.11786e-06
Dissulfurirhabdus	6.1665e-06	5.88049e-06	1.0802e-05	8.38263e-06	7.6315e-06	4.50336e-06	6.93622e-06	7.92297e-06	8.32268e-06	7.98456e-06	7.18564e-06	6.83527e-06	7.55107e-06	7.60647e-06	9.5627e-06	8.33543e-06	6.66958e-06	7.92662e-06	3.92405e-06	6.40881e-06	5.70513e-06	4.02068e-06	6.43177e-06	5.3467e-06
Diutina	0	0	2.18387e-07	0	0	1.31931e-07	0	1.62845e-07	9.38918e-08	3.77792e-07	1.86747e-07	4.39835e-07	4.19048e-07	2.62582e-07	1.90546e-07	9.01151e-07	2.40479e-07	8.28955e-07	0	1.99191e-06	5.10609e-07	1.72171e-06	1.15826e-06	2.08379e-07
Diversispora	1.70104e-05	5.91975e-05	2.86636e-05	3.30059e-05	3.58609e-05	1.42304e-05	1.98147e-05	2.53706e-05	2.5671e-05	2.35792e-05	1.07808e-05	1.60117e-05	9.38666e-06	1.49467e-05	7.90138e-06	2.36765e-05	1.93381e-05	6.54899e-06	2.81399e-05	1.41362e-05	7.68791e-06	4.1385e-05	2.23515e-05	8.52278e-06
Dokdonella	0.00090315	0.00085358	0.00147358	0.00123082	0.000983495	0.00147529	0.00122757	0.00083131	0.00154184	0.000826347	0.000742123	0.000879239	0.00111033	0.0010895	0.000823422	0.00121218	0.00052886	0.000532764	0.000280596	0.000337007	0.000483446	0.000559862	0.00114478	0.0016594
Dokdonia	2.27745e-06	2.22894e-06	1.39125e-06	1.23856e-06	2.43495e-06	9.57419e-07	1.31368e-06	6.7239e-07	2.84786e-06	4.05713e-06	1.29413e-06	2.36334e-06	2.13065e-06	1.50811e-06	1.2228e-06	2.38477e-06	4.09281e-06	2.95707e-06	2.99847e-06	2.50318e-06	3.88906e-06	3.17864e-06	1.10121e-06	2.53412e-06
Dolichospermum	1.59189e-05	1.53456e-05	1.55761e-05	1.70733e-05	1.71466e-05	1.54336e-05	1.54239e-05	1.90974e-05	1.69131e-05	1.83464e-05	1.91359e-05	1.46627e-05	1.929e-05	1.59233e-05	1.66649e-05	1.58823e-05	1.90235e-05	1.6215e-05	1.98638e-05	1.2562e-05	1.65658e-05	1.61596e-05	1.61091e-05	1.66087e-05
Dolosicoccus	6.16954e-07	9.28003e-08	8.59835e-07	3.29993e-07	4.80382e-07	5.12926e-07	8.25608e-07	8.82667e-08	9.52518e-07	8.51536e-07	3.54663e-07	6.43249e-07	5.17891e-07	7.19136e-07	5.91832e-07	6.00831e-07	1.14581e-06	0	1.06089e-06	1.23069e-07	1.76496e-06	2.94871e-07	2.03662e-07	3.38843e-07
Dolosigranulum	0	0	0	0	0	0	0	0	0	0	0	0	0	0	0	0	0	0	0	1.35855e-07	2.29216e-07	2.25251e-07	0	2.49365e-07
Domibacillus	2.4924e-06	2.1347e-06	2.89952e-06	2.39951e-06	1.50237e-06	3.22024e-06	1.09583e-06	2.03282e-06	2.36626e-06	2.33482e-06	2.53991e-06	9.44794e-07	1.38028e-06	1.34994e-06	2.09551e-06	2.87688e-06	1.57105e-06	1.13504e-06	1.31061e-06	1.65096e-06	2.39053e-06	2.60766e-06	1.3646e-06	2.11742e-06
Dominikia	0	2.19112e-07	0	0	0	0	0	0	0	0	0	0	4.86395e-07	0	0	0	0	0	0	0	0	0	0	0
Donghicola	1.2041e-06	1.34151e-06	7.10651e-07	3.33719e-07	1.19561e-06	3.9995e-07	1.72604e-06	1.41991e-06	6.51468e-07	2.60136e-06	4.35589e-07	1.18482e-06	5.0759e-07	9.02572e-07	3.66989e-07	4.80149e-07	1.60599e-06	2.15288e-06	8.58724e-07	2.30685e-06	7.66992e-07	4.69501e-07	7.29104e-07	6.46872e-07
Dongia	0.000648323	0.000689836	0.000804182	0.000758751	0.000779982	0.000758838	0.00139664	0.00180165	0.000805421	0.000702765	0.000623898	0.000576414	0.000776518	0.000718231	0.00043826	0.000824929	0.000468849	0.00124655	0.000674853	0.000544775	0.000306826	0.000304476	0.000449992	0.00042091
Dorea	6.3074e-07	4.63416e-07	1.30392e-06	7.47828e-07	9.20149e-07	4.45978e-07	1.12117e-06	5.33573e-07	1.91516e-06	2.47595e-06	1.07716e-06	1.96472e-06	1.34807e-06	1.12199e-06	1.14828e-06	2.00833e-06	1.20511e-06	1.48686e-06	1.71792e-06	1.81391e-06	1.26782e-06	2.83997e-06	2.14527e-06	1.97843e-06
Dothidotthia	0	0	0	4.2254e-07	0	0	0	0	0	0	0	1.48421e-07	0	0	0	0	1.03611e-07	0	0	2.22571e-07	0	0	0	2.04267e-07
Dothistroma	2.53525e-06	3.5439e-06	6.26756e-06	9.22708e-07	7.66116e-06	2.79801e-06	4.07819e-06	7.6114e-06	1.03771e-05	1.5011e-05	5.20881e-06	1.9613e-05	9.71198e-06	3.06139e-05	8.22959e-06	1.132e-05	2.00434e-05	2.32213e-05	2.06248e-05	2.926e-05	1.15858e-05	4.37459e-05	3.18594e-05	1.23403e-05
Draconibacterium	1.22539e-05	9.2728e-06	7.15335e-06	8.53791e-06	7.31835e-06	8.98811e-06	8.90974e-06	7.36204e-06	7.38724e-06	1.08928e-05	1.02257e-05	1.23212e-05	9.72789e-06	9.74303e-06	7.71137e-06	9.49385e-06	1.0998e-05	9.68192e-06	9.88946e-06	1.25269e-05	1.38432e-05	1.03583e-05	1.01915e-05	1.14149e-05
Drancourtella	2.49719e-07	1.6783e-07	3.3647e-07	4.72524e-07	6.87415e-08	7.79592e-08	0	4.54707e-07	0	3.27462e-07	3.22997e-07	0	1.75102e-07	2.05813e-07	0	0	0	0	0	0	0	2.38705e-07	0	1.9395e-07
Drechmeria	0	0	0	0	0	0	0	1.51569e-07	2.78282e-07	2.92266e-07	1.52255e-07	1.40925e-07	0	2.74418e-07	0	0	3.89577e-07	0	2.28173e-07	1.05665e-07	0	8.43908e-08	1.74861e-07	2.90926e-07
Drechslerella	2.1884e-07	6.39124e-07	1.12276e-06	0	1.96762e-06	0	4.3319e-07	1.07359e-06	8.13658e-07	6.3586e-07	1.53688e-06	7.61306e-07	6.50584e-07	1.29157e-06	2.66168e-07	2.19398e-06	6.18078e-07	5.42905e-07	6.22036e-07	9.78075e-07	1.26069e-07	4.26643e-07	5.4764e-07	1.04354e-07
Drulisvirus	0	0	0	0	0	5.86174e-07	0	9.49705e-08	0	0	0	0	0	0	0	0	0	0	0	0	0	0	0	0
Duganella	0.000261219	0.00023905	0.000308788	0.00031041	0.00026295	0.000258572	0.000289144	0.000277236	0.000348378	0.000257339	0.000303446	0.000257879	0.000249524	0.000211767	0.000262668	0.000233032	0.000301137	0.00030972	0.000325311	0.000286262	0.000275625	0.000255557	0.000297891	0.000318117
Duncaniella	0	8.48175e-08	1.25473e-07	1.95604e-08	2.4305e-07	1.02906e-07	2.67653e-07	8.06739e-08	0	4.20211e-07	3.01464e-07	2.6e-07	0	3.47788e-07	3.23959e-07	2.90756e-07	8.87597e-07	0	1.44802e-07	4.0234e-07	2.35329e-07	3.43343e-07	0	2.56015e-07
Duodenibacillus	0	5.22061e-07	0	0	2.34669e-07	1.77424e-07	0	0	0	1.79167e-07	0	0	0	7.80671e-08	0	0	0	0	0	1.20239e-07	0	0	0	0
Dyadobacter	0.000127573	0.000136022	0.000157435	0.00013899	0.000115643	0.000131514	0.000126812	0.000117078	0.000142697	0.000149577	0.000141389	0.00014048	0.000145746	0.000129578	0.000137272	0.000156027	0.000165705	0.000159446	0.000157029	0.000147176	0.000181419	0.000110406	0.00011698	0.000150571
Dyella	0.000934427	0.00101137	0.00195467	0.000597801	0.000820446	0.000781116	0.000862774	0.00104384	0.00086261	0.000565836	0.00051463	0.000564204	0.00075152	0.00177451	0.000639836	0.000897871	0.000473181	0.000470759	0.000404259	0.000422256	0.000377361	0.000336368	0.000486588	0.000543145
Dysgonomonas	1.22193e-05	8.45012e-06	1.22428e-05	1.04246e-05	1.03638e-05	1.13319e-05	1.0986e-05	1.55015e-05	9.73728e-06	1.29005e-05	1.01171e-05	9.81425e-06	1.08969e-05	8.81693e-06	1.49374e-05	1.33061e-05	1.67337e-05	1.20379e-05	1.04337e-05	1.44274e-05	1.30332e-05	8.96952e-06	5.91119e-06	1.14383e-05
Dysosmobacter	0	0	0	2.10896e-07	1.2045e-07	0	0	0	1.36268e-07	4.21284e-07	0	0	0	0	6.35976e-08	0	0	0	9.99517e-08	0	1.56192e-07	7.39353e-08	4.5959e-07	0
Echinicola	5.10324e-06	7.93927e-06	8.18711e-06	8.86958e-06	8.90491e-06	6.57094e-06	8.18796e-06	8.05745e-06	5.32848e-06	1.15867e-05	8.48105e-06	7.70473e-06	8.03959e-06	4.94917e-06	8.18525e-06	8.10094e-06	5.92891e-06	8.44291e-06	7.95973e-06	7.41967e-06	7.56619e-06	4.80706e-06	3.86563e-06	6.65233e-06
Ectothiorhodosinus	4.32026e-06	7.14206e-06	3.65889e-06	2.61112e-06	2.75904e-06	4.78865e-06	2.45629e-06	3.52111e-06	3.15416e-06	2.16922e-06	2.08944e-06	2.59166e-06	3.44481e-06	1.74967e-06	2.3988e-06	2.85109e-06	2.07497e-06	2.59129e-06	2.06689e-06	4.54464e-06	3.77879e-06	3.58389e-06	2.6337e-06	2.18416e-06
Ectothiorhodospira	1.5559e-05	1.58384e-05	1.91559e-05	1.50929e-05	1.18389e-05	1.09727e-05	1.32822e-05	1.50087e-05	1.40424e-05	1.93196e-05	1.5324e-05	1.60837e-05	1.31358e-05	1.25877e-05	1.43505e-05	1.80438e-05	1.51797e-05	1.56664e-05	1.24313e-05	1.45582e-05	1.19357e-05	1.15724e-05	1.05649e-05	1.51744e-05
Edaphobacillus	2.08099e-07	5.63431e-07	0	9.45685e-08	0	9.18805e-08	0	3.26203e-07	4.16473e-07	3.39897e-07	4.86385e-07	2.07201e-07	3.89116e-07	5.44349e-07	0	2.02661e-07	0	0	0	0	0	0	0	0
Edaphobacter	0.000758119	0.00134642	0.00104695	0.0010304	0.00146036	0.00144807	0.00150026	0.00172366	0.000402671	0.000416279	0.000401347	0.000420044	0.00124768	0.000553797	0.000485444	0.000676462	0.000340039	0.000316594	0.000310007	0.00031413	0.000381779	0.000298634	0.000355709	0.000353609
Edaphocola	1.4959e-06	9.92435e-07	1.16929e-06	1.44932e-06	1.89156e-06	2.69337e-06	1.49143e-06	2.94917e-06	1.54735e-06	2.36928e-06	1.30682e-06	1.87381e-06	8.86977e-07	4.47926e-07	6.28725e-07	5.4319e-07	2.06928e-06	1.051e-06	3.05481e-07	1.62204e-06	3.73919e-07	9.51859e-07	2.42127e-07	2.05111e-06
Edaphovirga	1.01854e-06	9.95804e-07	7.58221e-07	1.83387e-06	1.05834e-06	2.03372e-06	1.14656e-07	6.76116e-07	3.25421e-07	1.40844e-06	9.59176e-07	6.08072e-07	5.8622e-07	7.5667e-07	4.44565e-07	5.35974e-07	1.35188e-06	8.23072e-07	9.23736e-07	5.57681e-07	1.18158e-06	7.48219e-07	2.9847e-07	1.26328e-06
Edwardsiella	4.12229e-06	2.57659e-06	2.82991e-06	1.15829e-06	3.04716e-06	3.49458e-06	3.0928e-06	2.39306e-06	3.04372e-06	3.21221e-06	1.00312e-06	2.6837e-06	2.20656e-06	3.39773e-06	2.06831e-06	2.48992e-06	1.99616e-06	3.37773e-06	5.26142e-07	1.8504e-06	2.48751e-06	1.97343e-06	1.2305e-06	1.58728e-06
Effusibacillus	1.65976e-05	1.85844e-05	2.10575e-05	1.93043e-05	1.73441e-05	1.88064e-05	1.98386e-05	1.72618e-05	1.32424e-05	1.35223e-05	1.76887e-05	1.58271e-05	1.52355e-05	1.45755e-05	1.58887e-05	1.5563e-05	1.05082e-05	9.57627e-06	9.74937e-06	1.2227e-05	1.32455e-05	1.03431e-05	1.04599e-05	1.4954e-05
Eggerthella	1.10448e-06	1.26283e-06	6.57335e-07	1.20404e-06	7.06648e-07	1.26074e-06	1.8791e-06	4.09908e-07	6.78937e-07	8.7449e-07	1.50085e-06	1.47539e-06	5.08503e-07	1.59177e-06	6.11009e-07	1.04187e-06	7.78471e-07	2.12681e-06	8.85116e-07	8.02982e-07	8.03461e-07	7.31046e-07	6.87401e-07	9.61642e-07
Eggerthia	0	0	0	1.29167e-07	5.53285e-08	0	0	0	6.25945e-08	1.90091e-07	4.90185e-07	0	0	0	0	2.80608e-07	1.45364e-07	2.60148e-07	1.68575e-07	2.16869e-06	0	0	1.65488e-07	7.80532e-08
Egibacter	1.24327e-05	1.38514e-05	1.08063e-05	1.45173e-05	1.26366e-05	1.64552e-05	1.8016e-05	1.3581e-05	1.81619e-05	1.85435e-05	2.01909e-05	1.71025e-05	1.66007e-05	1.5286e-05	1.40652e-05	1.70984e-05	2.59181e-05	2.83267e-05	2.08495e-05	2.00092e-05	1.23673e-05	1.43213e-05	1.80019e-05	1.41896e-05
Egicoccus	8.72989e-06	1.19392e-05	1.02076e-05	1.27357e-05	1.21415e-05	1.54147e-05	1.761e-05	1.63438e-05	1.18251e-05	1.45866e-05	1.42259e-05	1.31269e-05	1.29822e-05	1.15107e-05	1.55399e-05	1.44677e-05	1.71514e-05	1.20018e-05	1.69044e-05	1.24751e-05	8.77804e-06	7.13554e-06	9.66125e-06	1.01691e-05
Ehrlichia	1.34509e-06	3.16324e-07	0	7.2742e-07	0	3.65017e-07	5.06197e-07	2.84911e-07	5.51916e-07	1.11339e-07	5.39302e-07	2.38645e-07	8.37542e-08	8.7646e-07	4.24202e-07	9.64434e-07	1.10955e-06	2.8566e-07	0	1.9802e-07	4.63817e-06	6.19618e-07	3.28694e-07	1.21526e-07
Eikenella	8.78698e-07	1.28049e-06	9.40184e-07	1.99023e-06	2.0512e-06	2.07024e-06	1.52101e-06	1.68921e-06	1.08551e-06	6.11033e-07	1.16771e-06	1.96751e-06	1.11566e-06	6.84293e-07	1.1313e-06	1.95205e-06	2.28165e-06	1.45849e-06	1.68861e-06	1.37793e-06	1.32022e-06	2.6985e-07	1.50852e-06	6.46996e-07
Eilatimonas	4.55496e-06	3.44587e-06	4.07841e-06	4.55005e-06	2.39855e-06	3.55027e-06	6.32633e-06	4.99029e-06	3.78267e-06	5.01475e-06	5.91132e-06	4.64255e-06	3.39566e-06	3.59925e-06	5.19332e-06	3.16728e-06	4.21776e-06	8.32474e-06	4.94484e-06	7.84347e-06	5.46097e-06	3.94644e-06	4.12822e-06	3.75876e-06
Eisenbergiella	4.52078e-07	0	3.51811e-07	5.15147e-07	2.00038e-07	2.26523e-07	2.35846e-07	6.6428e-07	2.71734e-07	4.00501e-07	1.39567e-07	1.04116e-07	9.15265e-07	3.05526e-07	6.82642e-07	3.8388e-07	1.90969e-07	0	0	5.00408e-07	2.86566e-07	0	0	0
Eisenibacter	1.51013e-06	1.61392e-06	7.01879e-07	1.16009e-06	9.81636e-07	1.70266e-06	1.36178e-06	8.01621e-07	1.73194e-06	2.18289e-06	2.76945e-06	2.10717e-06	2.68124e-06	1.21648e-06	9.36563e-07	1.4095e-06	3.11243e-06	1.62946e-06	7.00517e-07	2.77068e-06	2.15377e-06	1.1618e-06	1.10015e-06	1.01031e-06
Ekhidna	2.46234e-06	3.14122e-06	3.57223e-06	2.72253e-06	3.50875e-06	4.17745e-06	2.4855e-06	3.59365e-06	2.43335e-06	5.96402e-06	2.97753e-06	3.04617e-06	2.16955e-06	3.47915e-06	4.59659e-06	3.36938e-06	3.36952e-06	5.12386e-06	5.75747e-06	4.78507e-06	4.96039e-06	2.52315e-06	2.66826e-06	4.36478e-06
Elaphomyces	0	3.19785e-07	6.22341e-07	2.14696e-07	1.8393e-07	7.20287e-07	4.01472e-07	1.80363e-07	2.65487e-07	4.70682e-07	1.00644e-06	0	3.89116e-07	3.54486e-07	2.26943e-07	3.91025e-07	3.79458e-07	3.67245e-07	0	0	2.03203e-07	8.79441e-08	4.94139e-07	0
Eleftheria	7.7151e-07	4.56932e-07	2.71145e-06	5.1625e-07	4.9005e-07	1.12967e-06	1.6472e-06	3.211e-06	5.9876e-07	8.29122e-08	3.8487e-07	7.34292e-08	2.2123e-07	2.64617e-07	3.8298e-07	4.24902e-07	0	0	0	1.4265e-06	2.78679e-07	0	0	3.62285e-08
Elerivirus	0	0	0	0	0	0	0	0	1.2443e-06	0	0	0	0	0	0	0	0	0	0	0	0	0	0	0
Elioraea	5.34421e-05	5.61618e-05	5.42544e-05	5.12139e-05	4.55627e-05	4.60193e-05	4.50449e-05	4.72208e-05	4.48474e-05	4.41281e-05	5.59698e-05	4.02402e-05	5.03648e-05	4.81688e-05	4.5586e-05	4.79996e-05	5.88369e-05	6.35371e-05	5.83966e-05	5.27291e-05	4.9073e-05	3.8903e-05	4.53664e-05	5.24307e-05
Elizabethkingia	4.78527e-06	6.99876e-06	5.34209e-06	5.18793e-06	4.58183e-06	6.23717e-06	7.75727e-06	4.81603e-06	4.83168e-06	7.24833e-06	4.94421e-06	6.57763e-06	6.3185e-06	5.89412e-06	6.94864e-06	6.45528e-06	7.11417e-06	6.81779e-06	9.88582e-06	6.97809e-06	1.12572e-05	5.01253e-06	4.81952e-06	6.74845e-06
Ellagibacter	0	0	0	0	0	0	0	0	0	0	0	4.1034e-07	0	0	0	0	1.43227e-07	3.3187e-07	0	0	0	0	0	0
Elsinoe	0	0	0	1.58875e-07	4.53694e-08	1.98972e-07	7.05062e-07	4.26865e-07	4.42479e-08	1.46009e-07	7.73289e-07	4.0047e-07	1.262e-07	1.64135e-06	2.29257e-07	1.04226e-07	3.95868e-07	6.48481e-08	5.34644e-07	9.24827e-07	1.3931e-07	2.1003e-06	8.61807e-07	1.28646e-06
Elstera	1.77764e-05	1.46644e-05	1.32707e-05	1.27769e-05	1.23976e-05	1.06069e-05	1.2112e-05	1.42098e-05	1.06583e-05	1.19896e-05	1.23942e-05	1.23359e-05	1.2991e-05	8.67642e-06	1.35209e-05	1.3359e-05	1.06582e-05	1.65763e-05	1.23577e-05	9.68646e-06	1.12615e-05	9.22529e-06	1.02949e-05	1.12104e-05
Elusimicrobium	0	5.70665e-07	1.84105e-07	0	0	5.28448e-07	0	1.02776e-07	3.42677e-07	9.98575e-07	5.58899e-07	1.77512e-06	9.01343e-07	3.20904e-07	1.722e-06	1.35106e-06	1.02817e-06	5.40974e-07	9.73099e-07	7.00439e-07	8.83806e-07	1.38396e-06	5.80749e-07	5.44874e-07
Emalynvirus	7.21191e-08	4.58605e-07	6.0602e-07	2.27506e-07	1.04398e-07	1.21021e-07	4.95664e-07	3.30514e-08	9.63136e-07	1.28623e-06	8.61062e-07	7.02069e-07	1.38694e-06	6.66066e-07	8.05568e-07	2.63806e-06	1.50999e-07	8.74696e-08	1.75109e-07	1.62183e-07	2.05228e-07	0	0	7.28561e-07
Embleya	1.66886e-05	2.00366e-05	1.89397e-05	1.74884e-05	2.86218e-05	2.95887e-05	3.37455e-05	3.18213e-05	1.60102e-05	2.23048e-05	1.59845e-05	1.86944e-05	1.63038e-05	1.97098e-05	1.83557e-05	2.12264e-05	1.63895e-05	1.77633e-05	1.51883e-05	1.89094e-05	1.60872e-05	1.30566e-05	1.44814e-05	1.62386e-05
Emcibacter	2.26033e-05	1.62381e-05	2.00275e-05	2.52844e-05	1.89734e-05	1.42848e-05	3.41623e-05	2.60214e-05	1.028e-05	1.25167e-05	1.85517e-05	1.32242e-05	1.27301e-05	1.48822e-05	1.54433e-05	1.80733e-05	1.58644e-05	1.42537e-05	2.09715e-05	1.64975e-05	1.49592e-05	1.00687e-05	1.41689e-05	1.69149e-05
Emdodecavirus	0	4.15159e-07	0	0	0	0	3.39018e-07	0	6.85293e-07	2.4586e-08	5.6128e-07	6.60168e-08	8.33642e-08	4.28507e-08	2.50214e-07	1.49104e-06	0	0	0	0	4.25293e-07	0	0	0
Emergencia	2.24107e-07	1.8781e-07	3.47355e-07	4.57267e-07	0	7.08914e-07	3.83425e-07	4.81395e-07	9.09575e-07	7.51558e-07	1.44023e-07	6.23742e-07	5.00445e-07	1.9106e-06	9.50047e-07	4.25538e-07	1.01647e-06	9.64603e-07	5.50542e-07	1.30722e-06	7.84482e-07	1.95929e-06	2.26323e-06	1.36558e-06
Emmonsia	0	0	0	0	0	0	0	0	0	3.1175e-07	0	0	0	0	0	0	0	1.50448e-07	0	0	0	0	0	0
Empedobacter	6.0255e-06	7.00141e-06	4.59955e-06	7.84871e-06	4.97479e-06	6.27574e-06	1.03414e-05	5.94958e-06	7.52701e-06	6.59048e-06	6.32527e-06	7.28579e-06	7.35756e-06	8.09176e-06	6.93913e-06	6.89649e-06	8.73978e-06	8.30572e-06	6.92494e-06	8.03613e-06	8.31489e-06	6.38199e-06	7.48704e-06	8.441e-06
Emticicia	6.28919e-05	4.86191e-05	8.03886e-05	6.21061e-05	5.4825e-05	5.34232e-05	5.20733e-05	4.85129e-05	5.81907e-05	6.73977e-05	5.76549e-05	6.08062e-05	7.3636e-05	5.98636e-05	7.02199e-05	7.34911e-05	6.13689e-05	5.50471e-05	5.9731e-05	6.27731e-05	7.9777e-05	5.08382e-05	4.74407e-05	5.60466e-05
Encephalitozoon	0	0	0	0	1.80675e-07	0	0	6.63953e-08	0	0	0	0	0	8.18293e-08	0	8.05822e-07	3.52027e-07	0	0	0	0	2.01318e-07	3.82992e-07	0
Endobacter	1.75024e-06	2.18767e-06	2.78275e-06	2.92485e-06	2.22106e-06	1.33112e-06	3.61554e-06	3.62895e-06	2.52656e-06	1.28823e-06	2.52311e-06	2.42465e-06	2.57786e-06	2.65702e-06	2.33741e-06	1.43128e-06	1.26961e-06	1.21856e-06	2.16356e-06	1.09041e-06	2.73232e-06	1.05082e-06	2.81813e-06	1.2423e-06
Endocarpon	8.01327e-07	1.04477e-07	4.53382e-07	5.95153e-07	4.60014e-07	2.96845e-07	0	9.02163e-07	2.0395e-07	3.21237e-07	4.99112e-08	3.07789e-07	1.9412e-07	8.77408e-07	4.75929e-08	4.3485e-07	0	2.9308e-07	9.45773e-07	1.0827e-06	0	1.9918e-07	2.27055e-07	0
Endoconidiophora	0	5.67484e-08	0	0	0	0	0	0	0	5.60702e-08	4.33761e-07	0	0	0	0	0	0	0	8.12557e-08	0	0	0	0	0
Endogone	1.26252e-06	9.24861e-07	1.84175e-06	9.83095e-07	2.57307e-06	1.53921e-06	1.25758e-06	4.4571e-07	2.48763e-06	4.07719e-06	1.24516e-06	2.84149e-06	2.04156e-06	5.35186e-06	1.63253e-06	1.56838e-06	3.61167e-06	1.5576e-06	4.58584e-06	5.30869e-06	9.98981e-07	8.17862e-06	4.27577e-06	3.24754e-06
Endomicrobium	1.07903e-07	0	3.0228e-07	6.73441e-07	0	3.007e-07	7.15247e-07	3.89749e-07	5.47118e-07	1.30243e-06	8.1461e-07	1.45762e-06	3.18399e-06	2.04174e-07	2.14014e-06	1.44946e-06	2.64569e-06	2.48445e-06	2.16687e-06	1.70022e-06	1.9071e-06	1.67921e-06	1.32498e-06	1.68577e-06
Endozoicomonas	7.87422e-06	8.55806e-06	1.00987e-05	1.31081e-05	8.59866e-06	8.92208e-06	8.83727e-06	9.3379e-06	1.30604e-05	1.12082e-05	8.2288e-06	8.5071e-06	1.33571e-05	1.10344e-05	1.21815e-05	9.84988e-06	8.70636e-06	1.05901e-05	1.04957e-05	9.29357e-06	8.01886e-06	6.5609e-06	9.99963e-06	7.8897e-06
Eneladusvirus	0	0	0	3.1775e-07	0	0	0	0	0	0	0	0	0	0	0	0	0	0	0	0	0	0	0	0
Enhydrobacter	0.000843461	0.00110337	0.000900405	0.000950806	0.00082394	0.000715592	0.000761672	0.000968789	0.000886457	0.000780368	0.000752385	0.000655349	0.000960573	0.000840414	0.000615896	0.000858774	0.000602138	0.000645149	0.000550869	0.000551461	0.00037092	0.000312544	0.000356142	0.000487257
Enhygromyxa	8.71812e-05	0.000115449	0.000160884	0.000134849	9.90698e-05	9.99418e-05	0.000124351	8.02714e-05	0.000156594	0.000234065	0.000144155	0.000136485	0.000143338	0.000115985	0.000151602	0.000146885	9.96426e-05	0.000125075	0.000131975	7.81983e-05	8.01419e-05	5.93141e-05	8.12896e-05	7.6663e-05
Enorma	0	2.02257e-07	4.16549e-08	4.90355e-07	4.89861e-07	1.29351e-07	1.8459e-07	2.81905e-07	7.6823e-07	1.35011e-06	1.0844e-07	1.43087e-07	3.0639e-07	2.54694e-07	1.20445e-07	8.15174e-08	0	0	5.64727e-07	2.75285e-07	1.16116e-07	6.20037e-07	0	9.86073e-07
Enquatrovirus	0	0	0	0	1.55211e-07	0	2.93198e-07	1.06684e-06	0	0	4.01952e-07	9.30103e-08	6.15057e-07	3.12282e-07	3.59327e-08	8.74987e-08	0	0	0	0	0	0	0	0
Ensifer	0.000276295	0.000226158	0.000363279	0.000224936	0.000261775	0.00025579	0.000231065	0.00368937	0.000268057	0.000253673	0.000282866	0.000241068	0.000216648	0.000214981	0.000185919	0.000177836	0.000330626	0.000454036	0.000310659	0.000349337	0.000266955	0.000258691	0.000255274	0.000333274
Enteractinococcus	5.53316e-07	5.27196e-07	1.88765e-07	1.40115e-06	1.01739e-06	4.65787e-07	1.20016e-06	3.16643e-07	1.02154e-06	3.87606e-07	3.32497e-07	6.17732e-07	2.44298e-07	9.98799e-08	0	1.4253e-06	0	2.35074e-07	0	8.79941e-07	7.04895e-07	4.42082e-07	3.76859e-07	0
Enterobacillus	9.11223e-07	1.16997e-06	9.90195e-07	2.04744e-06	0	7.84369e-07	1.4175e-06	1.51035e-06	9.93256e-07	6.00379e-07	1.20149e-06	4.40309e-07	6.53771e-07	3.87286e-07	7.69832e-07	6.59983e-07	1.08878e-06	1.75043e-06	4.5878e-07	0	6.31022e-07	6.89713e-07	1.43068e-07	7.23114e-07
Enterobacter	4.54789e-05	3.71682e-05	7.79185e-05	2.48192e-05	6.98153e-05	4.20716e-05	2.2418e-05	0.000145536	0.000197563	0.000306616	9.21423e-05	0.000342259	0.000197011	0.000667799	0.000147189	0.000191356	0.000294378	0.000369757	0.000458273	0.000701052	0.000221385	0.00104698	0.000701284	0.000266159
Enterocloster	1.16358e-06	1.28996e-06	3.14084e-07	1.10933e-06	4.17441e-07	1.75763e-07	9.61154e-07	6.99748e-07	8.9155e-07	1.77153e-06	1.35666e-06	4.8223e-07	2.25999e-06	1.58121e-06	8.97543e-07	1.03321e-06	2.76303e-06	4.09548e-06	4.35301e-06	3.71368e-06	9.22589e-07	8.05726e-07	2.66576e-07	1.14764e-06
Enterococcus	0.00140513	0.000609859	0.00278411	0.000353048	0.00282715	0.00176471	0.000507499	0.00697022	0.00989038	0.0158603	0.00406972	0.0184289	0.0101517	0.0345607	0.00765589	0.00975576	0.0161051	0.0204747	0.0256323	0.0383936	0.00858539	0.0590067	0.0392673	0.0144616
Enterocytozoon	0	0	0	0	0	0	0	0	0	2.92266e-07	0	0	4.4612e-08	5.35508e-07	0	5.52713e-08	0	2.26526e-07	0	7.92487e-08	0	5.69638e-07	6.55729e-08	1.45463e-07
Enterorhabdus	3.40526e-07	4.33722e-07	4.84171e-07	4.12663e-07	2.60671e-07	9.9374e-07	6.13139e-07	4.00427e-07	9.59461e-07	4.11899e-07	0	4.80447e-07	3.64227e-07	5.58233e-07	3.71352e-07	0	7.8161e-07	3.8722e-07	0	2.15687e-07	1.12716e-06	4.43223e-07	3.26652e-07	1.24682e-07
Enteroscipio	0	0	0	4.96485e-07	0	0	2.45022e-07	8.82667e-08	8.36862e-08	0	0	0	0	2.95297e-07	0	0	0	0	0	0	0	0	0	0
Enterospora	7.9819e-08	9.61955e-08	3.82431e-07	4.3101e-07	4.74896e-07	4.19933e-07	4.0506e-07	1.82992e-07	3.26229e-07	2.45546e-07	9.19097e-08	1.93772e-07	3.71328e-06	6.45224e-06	9.33316e-08	1.57661e-07	6.63166e-07	2.75209e-07	0	4.67637e-07	7.54059e-06	4.36078e-07	3.95234e-08	4.91127e-07
Enterovibrio	4.41185e-06	2.69508e-06	3.23536e-06	5.27406e-06	3.66534e-06	4.5652e-06	3.19823e-06	6.2513e-06	4.04172e-06	4.16274e-06	3.82003e-06	3.23204e-06	2.865e-06	3.61411e-06	3.6776e-06	4.64085e-06	2.93409e-06	4.4385e-06	6.12126e-06	2.55521e-06	3.62722e-06	2.18984e-06	3.39473e-06	4.90118e-06
Enterovirga	3.94423e-05	3.71363e-05	3.26094e-05	4.22661e-05	3.10757e-05	3.21092e-05	3.32193e-05	2.83306e-05	3.66829e-05	3.3288e-05	4.03669e-05	3.83968e-05	4.30493e-05	3.49695e-05	3.84446e-05	3.24196e-05	5.6938e-05	5.88738e-05	4.71988e-05	3.95541e-05	4.07709e-05	3.14252e-05	4.43994e-05	4.43798e-05
Entomomonas	0	0	8.43e-07	0	0	3.7195e-07	0	1.1198e-07	1.71092e-07	4.98369e-07	0	2.19763e-07	0	8.18293e-08	1.73169e-07	0	4.32863e-07	8.14131e-07	1.18898e-06	1.13577e-06	1.82086e-07	3.09433e-08	0	0
Entomoplasma	0	0	0	0	0	0	0	0	0	1.56501e-08	0	1.84544e-08	5.26623e-08	6.7777e-06	0	1.82852e-08	0	0	0	0	0	0	0	0
Eoetvoesia	1.19486e-05	1.27954e-05	8.23847e-06	1.09691e-05	8.44876e-06	1.08808e-05	1.26359e-05	9.95545e-06	7.74888e-06	7.85966e-06	6.57714e-06	8.26305e-06	9.61462e-06	1.08856e-05	9.62275e-06	1.19552e-05	4.88693e-06	9.59874e-06	6.01229e-06	7.59354e-06	8.31876e-06	7.41397e-06	7.97986e-06	1.45861e-05
Ephemeroptericola	2.04575e-06	1.14926e-06	2.44509e-06	2.51477e-06	2.83271e-06	1.52865e-06	2.84016e-06	1.87179e-06	2.87898e-06	2.75527e-06	4.12829e-06	3.23342e-06	1.89992e-06	9.56447e-07	2.48215e-06	3.12177e-06	2.05257e-06	4.52431e-06	1.58276e-06	2.0348e-06	2.19162e-06	2.02397e-06	1.26355e-06	3.0128e-06
Epibacterium	1.64773e-06	1.72164e-06	1.65747e-06	2.28154e-06	1.54769e-06	3.14427e-06	1.99454e-06	1.83223e-06	1.75939e-06	2.24404e-06	3.95215e-06	1.67851e-06	2.91462e-06	1.70064e-06	2.04429e-06	1.80536e-06	1.62397e-06	3.28298e-06	4.07408e-06	1.82887e-06	2.4963e-06	2.29374e-06	9.78066e-07	2.03624e-06
Epichloe	0	0	0	1.39364e-07	0	0	0	0	6.75362e-08	5.4693e-07	0	2.79031e-07	0	1.81116e-07	0	9.38569e-07	0	3.44011e-07	9.9075e-08	0	0	0	0	0
Epicoccum	0	0	3.74265e-07	0	0	0	1.92172e-05	0	2.24246e-07	0	0	0	0	0	0	0	0	0	0	1.0517e-06	0	7.11878e-07	2.8196e-07	9.32092e-08
Epidermidibacterium	3.34919e-06	2.61025e-06	8.29881e-06	1.75927e-06	5.02312e-06	2.54595e-06	5.78805e-06	4.71666e-06	1.52984e-06	1.46446e-06	1.07123e-06	1.77366e-06	2.16647e-06	4.91783e-06	1.88834e-06	2.56007e-06	3.22365e-06	1.11593e-06	3.47443e-06	7.84009e-07	2.65682e-06	1.1254e-06	2.72585e-06	2.94143e-06
Epidermophyton	0	0	0	0	0	0	0	0	0	0	0	9.56205e-07	0	0	0	0	0	0	0	0	0	0	0	0
Epulopiscium	2.64211e-06	2.03786e-06	2.51164e-06	1.88827e-06	2.54582e-06	2.37205e-06	1.66305e-06	1.44655e-06	1.77916e-06	2.1794e-06	2.03081e-06	2.99808e-06	3.17597e-06	1.84929e-06	2.22296e-06	2.94504e-06	2.01001e-06	6.30989e-07	3.574e-07	1.06472e-06	2.53713e-06	2.33752e-06	2.00265e-06	2.45682e-06
Eracentumvirus	1.20582e-07	1.13943e-06	6.57806e-07	2.45178e-07	7.69389e-07	5.34254e-07	4.3319e-07	2.31564e-07	4.75255e-08	0	0	0	1.72941e-07	0	2.21807e-07	9.00717e-08	0	0	0	0	0	0	0	0
Ereboglobus	1.46439e-05	2.04536e-05	1.95764e-05	2.06058e-05	2.00159e-05	1.9251e-05	1.94678e-05	1.71467e-05	1.56292e-05	1.75678e-05	1.59283e-05	1.42999e-05	2.6702e-05	1.86381e-05	2.1844e-05	2.24499e-05	1.71024e-05	2.05301e-05	1.52498e-05	1.58863e-05	1.25487e-05	1.21332e-05	1.57237e-05	1.37761e-05
Eremomyces	0	0	0	1.07348e-07	5.24269e-07	2.89423e-07	5.18533e-07	1.25415e-06	1.11582e-07	3.38859e-07	0	5.35886e-07	0	9.00749e-07	2.79995e-07	0	5.37423e-07	3.13433e-07	6.27475e-07	1.04563e-06	0	4.42417e-07	8.55156e-07	2.59474e-07
Eremothecium	0	0	0	1.15127e-07	3.94516e-07	1.07194e-07	3.20442e-07	3.17142e-07	6.41594e-07	6.99219e-07	1.03347e-06	1.6664e-07	0	7.8083e-07	0	2.02661e-07	8.41902e-07	1.56716e-07	6.29684e-07	1.03412e-06	1.31714e-07	1.24575e-06	3.39436e-07	7.2161e-07
Ermolevavirus	0	0	0	0	2.11724e-07	5.04283e-07	0	3.69238e-07	0	0	3.3746e-07	1.44766e-07	5.26959e-07	0	4.57034e-07	9.3536e-08	9.31982e-07	7.46452e-07	1.61351e-07	9.37869e-07	7.13598e-07	0	3.70955e-07	9.05712e-08
Errantivirus	0	0	0	1.65495e-07	0	7.0807e-08	0	0	1.11582e-07	1.65018e-06	0	5.52322e-07	1.45919e-07	2.23423e-07	4.16611e-07	0	4.62115e-07	0	1.17652e-07	1.51606e-07	1.30572e-06	0	0	3.83022e-07
Erwinia	7.29699e-06	7.06077e-06	7.23162e-06	9.28599e-06	6.80059e-06	8.92495e-06	6.32227e-06	7.72713e-06	7.72168e-06	6.46437e-06	8.50857e-06	5.92431e-06	6.88516e-06	5.35347e-06	6.54126e-06	7.0594e-06	6.79071e-06	8.07475e-06	9.6121e-06	7.75946e-06	8.49037e-06	4.26391e-06	5.10434e-06	5.61739e-06
Erysipelatoclostridium	2.53302e-06	9.85922e-07	2.20677e-06	1.30842e-06	2.04012e-06	2.60095e-06	8.43584e-07	5.86276e-06	4.77294e-06	1.06038e-05	4.68583e-06	8.34375e-06	6.79258e-06	3.10249e-05	5.53546e-06	6.15659e-06	7.11442e-06	1.20731e-05	1.43589e-05	2.13076e-05	4.76978e-06	2.96633e-05	2.14164e-05	7.84212e-06
Erysipelothrix	1.19964e-06	2.01647e-06	5.37296e-07	7.65602e-07	2.86807e-07	1.09581e-06	9.25861e-07	9.39859e-07	2.64289e-07	5.80685e-07	4.19658e-07	4.41696e-07	3.9168e-07	6.29771e-07	4.40916e-07	1.24592e-06	4.73746e-07	1.19928e-06	1.42969e-07	0	2.15925e-06	3.87939e-07	9.54174e-07	1.02086e-06
Erysiphe	2.17302e-06	2.38005e-06	2.23876e-06	2.14351e-06	2.29145e-06	3.58526e-06	2.74349e-06	1.98407e-06	3.72586e-06	2.09975e-06	1.80677e-06	2.65123e-06	2.70964e-06	4.53738e-06	1.73463e-06	2.1329e-06	1.37551e-06	9.99039e-07	1.61354e-06	3.85501e-06	2.37869e-05	4.86897e-06	2.49107e-06	1.3613e-06
Erythrobacter	0.000237305	0.000210964	0.000215345	0.000226309	0.00026902	0.000286439	0.000288623	0.000287069	0.00048431	0.000268677	0.000253196	0.000258034	0.000252243	0.000247719	0.000243939	0.00023635	0.000361661	0.000382696	0.000369468	0.000330192	0.000283989	0.000215905	0.000236091	0.000287864
Erythromicrobium	9.50723e-07	2.8987e-06	9.49803e-07	1.76633e-06	1.71603e-06	1.57641e-06	1.88745e-06	3.49626e-06	2.34997e-06	9.87283e-07	3.31396e-06	2.33291e-06	2.37875e-06	2.27724e-06	2.10481e-06	2.24293e-06	3.85021e-06	4.04767e-06	1.24359e-06	2.25538e-06	3.81855e-06	2.55235e-06	2.21439e-06	5.18139e-06
Escherichia	8.23917e-05	7.16897e-05	0.000140455	4.60754e-05	0.0001455	9.53231e-05	5.96123e-05	0.000255828	0.000361124	0.000555998	0.000163777	0.000652488	0.000349654	0.00125701	0.000275548	0.000339605	0.000544732	0.000701899	0.000822983	0.00128316	0.000298412	0.00198951	0.00131695	0.000479612
Escovopsis	2.72063e-07	9.17213e-08	8.67004e-08	1.84738e-07	3.98037e-08	8.97437e-08	9.06676e-08	0	0	0	0	0	2.44329e-07	1.5795e-07	8.35643e-08	8.37322e-07	0	0	1.31332e-07	2.43275e-07	0	2.51515e-07	2.01293e-07	4.46537e-07
Esteya	0	0	0	0	0	0	3.68904e-07	0	2.04402e-07	0	0	0	0	0	0	3.87388e-07	3.44758e-07	1.99709e-07	0	9.25737e-08	1.56192e-07	7.39353e-08	0	0
Estrella	2.30005e-07	1.9178e-07	0	4.57148e-07	1.18808e-06	1.40313e-06	8.64484e-07	3.39554e-07	1.13406e-06	9.96588e-07	4.45125e-07	1.39675e-06	3.02591e-06	2.42945e-06	1.90163e-06	1.88669e-06	8.72187e-07	1.45594e-07	1.59078e-07	6.90048e-07	3.78856e-07	4.9057e-07	4.8764e-07	0
Ethanoligenens	2.5293e-07	9.86004e-08	7.36465e-07	1.79526e-07	4.48878e-07	1.88495e-07	4.38057e-07	1.09804e-06	5.64791e-07	0	6.04286e-07	7.943e-07	6.67056e-08	5.79445e-07	3.63604e-07	1.35636e-06	6.09278e-07	3.65563e-07	3.81572e-07	4.94769e-07	5.04276e-07	4.26833e-07	3.88222e-07	3.9811e-07
Eubacterium	3.86127e-06	5.64199e-06	4.1085e-06	6.9082e-06	4.6124e-06	4.4365e-06	5.4916e-06	3.92842e-06	5.27942e-06	8.15279e-06	3.41353e-06	4.23867e-06	4.4804e-06	3.9724e-06	6.13506e-06	4.61875e-06	3.40274e-06	4.57529e-06	3.23038e-06	2.75546e-06	3.23861e-06	2.96851e-06	4.58842e-06	4.26257e-06
Eudoraea	3.4984e-06	3.17584e-06	3.23426e-06	2.57222e-06	9.09645e-07	2.82821e-06	4.53657e-06	2.40236e-06	4.56163e-06	5.7512e-06	5.57737e-06	3.41511e-06	3.35011e-06	3.45237e-06	4.59735e-06	4.41619e-06	8.70614e-06	7.8353e-06	7.88224e-06	4.36354e-06	4.97247e-06	2.55186e-06	7.0206e-06	3.93585e-06
Euhalothece	1.81922e-06	3.03897e-06	1.94452e-06	2.16754e-06	4.17781e-06	3.66453e-06	2.78471e-06	2.79884e-06	3.41682e-06	3.45181e-06	2.84473e-06	2.39112e-06	2.73489e-06	2.45597e-06	1.59864e-06	2.84216e-06	2.81669e-06	1.14327e-06	1.97123e-06	1.99446e-06	2.93169e-06	2.28263e-06	2.38732e-06	1.35595e-06
Euryhalocaulis	2.66571e-06	3.34514e-06	3.33966e-06	2.98417e-06	4.18499e-06	1.85136e-06	3.5252e-06	5.03e-06	3.6053e-06	5.62992e-06	3.20271e-06	2.74663e-06	2.48738e-06	2.39371e-06	2.74098e-06	4.38369e-06	7.05535e-06	7.78727e-06	2.78759e-06	2.79569e-06	3.11824e-06	4.46595e-06	4.32174e-06	3.66736e-06
Eutypa	8.91855e-08	0	0	0	0	7.08792e-07	2.0253e-07	0	3.44737e-07	2.88657e-07	7.19124e-07	3.07755e-07	5.60327e-07	7.71994e-07	0	2.23341e-07	0	0	1.50594e-07	1.39478e-07	3.43824e-07	3.21334e-07	8.61078e-07	0
Euzebya	2.09345e-05	2.4253e-05	2.71804e-05	3.00163e-05	3.94188e-05	4.02677e-05	3.60444e-05	4.29481e-05	3.99343e-05	3.39893e-05	3.67795e-05	3.97204e-05	3.25742e-05	3.03536e-05	3.14777e-05	3.19372e-05	6.42938e-05	5.91988e-05	7.5409e-05	4.64066e-05	3.22213e-05	2.95308e-05	2.95903e-05	2.64502e-05
Euzebyella	5.62095e-07	3.36119e-07	8.57062e-07	1.12395e-06	1.18328e-06	6.14109e-07	3.60374e-07	2.1866e-06	1.47315e-07	9.28046e-07	3.03566e-07	6.42083e-07	1.02968e-06	4.76413e-07	6.06984e-07	1.13905e-06	5.1685e-07	8.31421e-07	1.31982e-06	3.35839e-07	1.76146e-07	2.72435e-07	1.0727e-06	5.65781e-07
Evtepia	0	0	0	0	5.7673e-08	0	0	0	0	0	0	2.95584e-07	0	0	0	0	0	0	0	0	0	0	0	8.13606e-08
Ewingella	1.15653e-06	1.74171e-06	1.35538e-06	7.95721e-07	1.74908e-06	7.1255e-07	6.70304e-07	6.66685e-07	9.23071e-07	1.25205e-06	1.2718e-06	1.50469e-06	4.39262e-07	1.5289e-06	6.73428e-07	1.77438e-06	1.47483e-06	7.00843e-07	3.2504e-06	4.09956e-07	4.60171e-07	7.19983e-07	1.5713e-06	3.4465e-07
Exidia	7.22329e-08	1.11099e-07	6.16218e-08	1.27325e-06	1.00821e-07	5.71701e-08	0	1.11151e-07	1.7769e-07	4.09277e-07	1.65814e-06	3.63992e-07	2.70414e-07	1.34801e-06	5.11342e-07	1.08086e-07	4.51116e-07	5.53731e-07	1.4352e-06	1.55812e-06	1.06323e-07	1.7658e-06	1.04207e-06	5.69981e-07
Exiguobacterium	4.908e-06	3.80659e-06	3.34808e-06	2.97095e-06	3.30811e-06	2.59975e-06	4.50055e-06	3.99686e-06	2.81434e-06	2.4433e-06	4.11374e-06	4.48948e-06	5.33885e-06	5.27004e-06	3.81136e-06	2.79779e-06	2.85612e-06	4.22033e-06	2.91193e-06	4.63458e-06	3.46195e-06	3.78328e-07	2.21189e-06	3.21435e-06
Exilibacterium	1.36279e-05	1.23066e-05	1.33514e-05	1.4006e-05	1.34522e-05	1.66992e-05	1.93694e-05	1.85024e-05	9.7011e-06	9.90636e-06	9.97871e-06	8.99006e-06	9.57005e-06	6.89956e-06	8.69718e-06	9.50812e-06	1.12e-05	6.94394e-06	1.05714e-05	1.04853e-05	8.42041e-06	6.99723e-06	6.97175e-06	5.36402e-06
Exilispira	0	1.79273e-07	0	1.8054e-07	0	2.63112e-07	0	0	0	0	2.5693e-07	0	5.52392e-07	0	5.36308e-07	0	9.54845e-08	0	4.84945e-07	0	0	7.37178e-07	9.83593e-08	2.18194e-07
Exophiala	1.5675e-06	7.04146e-07	1.00835e-06	3.16467e-07	1.12648e-06	4.75927e-07	1.75505e-06	5.42004e-07	9.06491e-07	1.28446e-06	8.81975e-07	1.23501e-06	7.97196e-07	2.6259e-06	5.61896e-07	8.34807e-07	1.46488e-06	2.47163e-06	1.29477e-06	2.82653e-06	1.26748e-06	4.39294e-06	2.54784e-06	7.82993e-07
Exserohilum	5.91441e-07	4.77471e-07	0	0	4.34141e-07	2.90149e-07	6.68858e-07	2.25644e-07	1.15776e-07	5.85996e-08	0	0	1.57987e-07	2.55332e-07	5.40341e-08	2.74279e-07	3.66143e-07	2.54517e-07	0	0	0	3.14086e-07	3.25399e-07	3.60923e-07
Extensimonas	1.37285e-05	1.3478e-05	1.04061e-05	1.11087e-05	1.00433e-05	7.86169e-06	6.70651e-06	1.02809e-05	1.45749e-05	9.07976e-06	1.1356e-05	8.51299e-06	8.92503e-06	7.33829e-06	8.20155e-06	6.97827e-06	1.33277e-05	1.04188e-05	9.31058e-06	1.05268e-05	6.54159e-06	7.45742e-06	6.84925e-06	9.8562e-06
Eyrevirus	0	0	0	0	0	3.95793e-07	0	0	0	0	0	0	0	0	0	0	0	0	0	0	0	0	0	0
Ezakiella	0	0	0	0	0	0	0	0	0	0	0	0	0	0	0	0	3.34508e-07	1.23249e-06	0	2.61521e-07	0	0	0	3.78969e-07
Facklamia	2.36913e-07	4.2887e-07	1.06518e-07	0	3.46787e-07	0	9.62643e-08	3.85058e-07	1.01716e-06	7.97178e-07	2.93755e-07	0	0	1.94052e-07	3.51553e-07	4.13757e-07	0	0	5.57755e-07	0	0	0	7.4191e-07	5.48603e-07
Faecalibacillus	0	0	0	0	0	0	0	0	0	0	0	0	0	0	0	0	4.28106e-07	1.11596e-06	2.48232e-07	0	0	0	0	0
Faecalibacterium	4.5466e-06	4.17023e-06	3.69869e-06	4.72304e-06	3.40626e-06	3.71367e-06	3.65069e-06	3.18946e-06	7.30679e-06	4.9004e-06	5.20024e-06	3.70533e-06	4.53205e-06	4.46555e-06	6.27997e-06	3.48969e-06	4.88089e-06	4.36705e-06	3.88936e-06	2.60676e-06	3.96827e-06	3.73586e-06	4.9883e-06	5.73375e-06
Faecalibaculum	1.00462e-07	4.3104e-08	9.81084e-08	9.13075e-08	0	2.78976e-07	2.68876e-07	8.62376e-08	4.05217e-07	4.10197e-07	7.04922e-07	0	0	4.91001e-07	0	9.59975e-08	0	0	0	5.7163e-08	0	0	0	2.52646e-07
Faecalicatena	1.43282e-07	8.65256e-07	0	3.66368e-07	1.67346e-07	6.3262e-08	3.36724e-07	1.73477e-07	3.53983e-07	2.81233e-07	0	7.75208e-07	2.87053e-07	2.77272e-07	0	6.40837e-07	5.41384e-07	0	0	1.71489e-07	0	1.21296e-06	2.30816e-07	7.8693e-08
Faecalicoccus	1.06588e-07	9.61955e-08	0	9.68751e-08	1.65986e-07	0	0	0	0	9.50457e-08	1.83819e-07	0	0	4.14136e-07	0	1.77947e-07	2.37547e-07	1.37605e-07	2.75477e-07	0	0	0	0	0
Faecalitalea	0	0	0	0	0	0	0	0	0	3.1175e-07	0	0	0	0	0	0	0	0	3.01188e-07	0	0	0	0	2.56015e-07
Falsibacillus	2.08528e-06	1.27779e-06	9.02662e-07	1.18263e-06	1.26461e-06	1.83013e-06	9.48256e-07	1.67451e-06	2.845e-06	2.11829e-06	1.71291e-06	1.32792e-06	2.11949e-06	1.31338e-06	2.13235e-06	1.50861e-06	1.62513e-06	4.90923e-07	2.05841e-07	1.54354e-06	1.0561e-06	6.48371e-07	1.06013e-06	4.28042e-07
Falsirhodobacter	4.80296e-07	9.57334e-07	7.70077e-07	1.33706e-06	4.76753e-07	4.78487e-07	9.19439e-07	1.1929e-06	6.94529e-07	1.1122e-06	1.21954e-06	1.34547e-06	8.61335e-07	5.77456e-07	7.91974e-07	6.48724e-07	1.3794e-06	2.14044e-06	1.93285e-06	2.52398e-07	2.10812e-06	1.27976e-06	9.92638e-07	1.69705e-06
Falsochrobactrum	7.92784e-07	2.79898e-06	1.25825e-06	2.13164e-06	1.60078e-06	1.1938e-06	1.22261e-06	3.05009e-07	1.21778e-06	1.13831e-06	3.78514e-07	1.72273e-06	1.63687e-06	1.05771e-06	1.53761e-06	2.02725e-06	1.57294e-06	1.22514e-06	2.29067e-06	2.47003e-06	1.55367e-06	2.02093e-07	1.34638e-06	0
Fangia	1.77384e-07	2.66465e-07	7.10118e-08	2.965e-07	5.16867e-07	7.35044e-08	3.71305e-07	1.42908e-07	0	1.48452e-07	0	4.15674e-07	1.15511e-06	2.58737e-07	0	0	0	0	0	9.9627e-08	8.40459e-08	1.59137e-07	8.24344e-08	0
Fannyhessea	0	0	0	0	0	0	0	0	0	0	0	0	0	0	0	0	4.0025e-07	0	0	0	0	0	0	0
Fastidiosibacter	7.34469e-08	0	1.30441e-07	0	0	0	0	0	3.29963e-07	0	5.79738e-07	0	0	0	0	6.90076e-07	0	1.43485e-06	0	0	0	3.03807e-07	0	2.61833e-07
Fastidiosipila	1.0671e-06	2.26218e-06	2.64275e-06	1.76439e-06	1.138e-06	1.16439e-06	9.31385e-07	1.62451e-06	1.29539e-06	4.06534e-07	1.03088e-06	9.39687e-07	1.21396e-06	9.54482e-07	1.7708e-06	1.8808e-06	3.58837e-07	1.60324e-06	1.4599e-06	1.29684e-06	7.50453e-07	1.937e-07	7.07213e-07	1.01974e-06
Fermentimonas	2.50154e-07	3.62366e-07	3.31053e-07	1.50368e-06	2.31855e-07	9.07995e-08	7.56048e-07	2.02775e-07	3.49603e-07	8.02326e-07	6.56257e-07	1.30388e-07	4.2412e-07	3.17305e-07	3.95598e-07	8.23934e-07	5.64604e-07	0	2.58185e-07	7.73094e-07	1.43449e-05	5.27117e-07	3.02792e-07	4.44295e-07
Ferrimicrobium	5.20269e-06	6.24933e-06	4.10258e-06	5.74761e-06	6.02281e-06	1.06732e-05	6.36799e-06	6.81394e-06	8.7015e-06	7.04033e-06	4.73745e-06	5.33309e-06	5.60674e-06	7.69203e-06	5.93653e-06	7.96098e-06	8.12755e-06	7.06542e-06	8.83875e-06	9.48409e-06	4.0804e-06	3.85709e-06	4.06668e-06	3.78982e-06
Ferrimonas	5.47103e-06	4.79601e-06	5.35439e-06	5.58095e-06	5.7934e-06	4.66165e-06	3.73962e-06	5.94828e-06	4.42428e-06	7.35548e-06	5.19418e-06	4.87773e-06	4.88053e-06	3.4993e-06	4.10516e-06	5.32112e-06	3.21284e-06	5.22921e-06	5.76494e-06	4.25497e-06	5.04444e-06	3.89372e-06	5.22293e-06	4.24566e-06
Ferriphaselus	1.25244e-05	1.41402e-05	1.37602e-05	1.28482e-05	1.24299e-05	1.34119e-05	1.31459e-05	8.726e-06	1.16607e-05	1.43443e-05	1.05613e-05	1.38595e-05	1.31253e-05	1.23792e-05	1.65709e-05	1.32186e-05	1.66676e-05	1.27446e-05	1.18754e-05	1.19119e-05	1.03418e-05	1.09668e-05	1.08914e-05	1.30473e-05
Ferrithrix	3.97963e-06	4.51545e-06	3.68551e-06	4.77169e-06	4.2838e-06	7.93747e-06	4.31965e-06	4.87171e-06	6.97305e-06	7.50823e-06	3.12914e-06	5.1808e-06	4.57024e-06	6.40241e-06	6.1495e-06	4.78327e-06	5.85802e-06	4.86136e-06	8.41257e-06	7.99696e-06	4.14658e-06	5.73143e-06	6.2077e-06	5.61591e-06
Ferroglobus	5.35113e-07	0	1.43885e-07	4.06012e-07	0	1.04297e-07	0	4.73141e-07	4.09153e-07	3.32866e-07	2.17715e-07	3.06186e-07	6.30999e-08	3.82042e-07	2.76151e-07	0	1.17807e-06	1.01654e-07	9.06473e-07	0	1.80098e-07	1.60519e-07	0	0
Ferroplasma	0	0	1.43389e-07	0	0	1.00233e-07	0	0	4.93534e-08	0	6.91431e-08	0	2.71471e-07	1.05848e-07	3.26062e-07	6.6934e-08	7.80753e-07	4.35862e-07	9.44973e-07	1.34113e-07	1.11868e-06	1.07111e-07	2.91762e-07	4.35589e-07
Ferrovibrio	3.94257e-05	4.69483e-05	4.14906e-05	3.67093e-05	3.09416e-05	3.3929e-05	3.48068e-05	2.84084e-05	4.54842e-05	4.24307e-05	6.34741e-05	4.73355e-05	4.07801e-05	3.35413e-05	3.71234e-05	3.65507e-05	5.194e-05	7.26785e-05	5.44342e-05	4.27859e-05	3.31332e-05	2.56577e-05	2.99079e-05	3.97915e-05
Ferrovum	3.59353e-05	3.63892e-05	3.63574e-05	3.69788e-05	3.2171e-05	3.54276e-05	3.36591e-05	3.65493e-05	3.38997e-05	2.55305e-05	3.067e-05	2.43605e-05	3.42457e-05	2.5168e-05	3.09284e-05	2.87573e-05	2.91862e-05	3.2154e-05	3.12257e-05	3.21025e-05	2.63902e-05	2.30439e-05	2.81635e-05	3.48211e-05
Ferruginibacter	0.000322104	0.00056497	0.000358698	0.00052497	0.000468121	0.000622397	0.000469527	0.000397375	0.000310525	0.000780978	0.000322744	0.000345721	0.000530977	0.000447095	0.000611098	0.00050315	0.000438013	0.000401992	0.000267295	0.000437835	0.00112498	0.00061597	0.000735323	0.000845784
Ferruginivarius	1.82481e-05	2.28415e-05	1.77868e-05	1.93855e-05	1.36062e-05	1.34319e-05	1.19174e-05	1.18865e-05	1.27901e-05	1.27994e-05	1.65783e-05	1.85674e-05	1.78921e-05	1.61209e-05	1.37809e-05	1.35934e-05	1.45679e-05	1.66634e-05	1.55045e-05	1.12943e-05	1.25224e-05	8.09535e-06	1.12238e-05	1.26043e-05
Fertoebacter	1.87223e-06	8.92983e-07	4.2365e-07	2.3965e-06	2.12128e-06	1.23781e-06	1.82041e-06	1.22644e-06	2.01854e-06	6.90509e-07	8.00592e-07	6.89959e-07	8.79028e-07	8.56266e-07	1.18477e-06	2.14219e-06	4.97583e-07	2.48714e-06	1.4806e-06	1.28005e-06	7.17894e-07	4.55259e-07	1.34025e-06	2.31686e-06
Fervidicella	7.40693e-08	0	3.87214e-07	3.90946e-07	3.12734e-07	4.69577e-07	9.06676e-08	7.88526e-07	3.39258e-07	5.09451e-07	5.4281e-07	1.4648e-07	7.53128e-08	9.47855e-07	7.84955e-07	4.85784e-07	1.65075e-07	7.94618e-08	0	1.21638e-07	7.35647e-07	3.97684e-07	1.08195e-07	5.97349e-07
Fervidicoccus	0	0	1.11287e-07	0	0	0	0	3.98934e-07	0	0	4.43238e-07	2.86676e-07	3.86489e-07	0	4.43613e-07	0	0	6.35694e-07	0	0	0	7.05076e-07	0	0
Fervidicola	5.67378e-07	9.9324e-07	1.0214e-07	2.6628e-07	7.41195e-07	8.91477e-07	1.11498e-06	1.09092e-06	7.54817e-08	2.14159e-07	1.50318e-06	4.77793e-08	5.3593e-07	5.12568e-07	5.3613e-07	5.9664e-07	3.81938e-07	1.44392e-06	0	6.29851e-07	3.39416e-07	0	0	1.32566e-06
Fervidobacterium	1.95202e-06	1.27728e-06	9.3357e-07	1.68199e-06	2.46082e-06	1.65501e-06	1.76002e-06	1.33132e-06	2.59072e-06	1.41923e-06	2.80176e-06	1.51467e-06	1.08105e-06	1.19231e-06	1.59882e-06	1.80601e-06	3.0026e-06	2.88255e-06	3.32589e-06	2.00536e-06	1.01451e-06	1.87387e-06	2.27103e-06	1.1726e-06
Fibrella	1.75019e-05	1.35822e-05	1.92662e-05	1.28955e-05	1.53471e-05	1.61419e-05	1.8036e-05	1.20848e-05	1.52761e-05	1.51824e-05	1.65239e-05	1.87534e-05	1.89452e-05	1.36254e-05	1.87861e-05	1.73672e-05	1.99423e-05	1.89407e-05	1.57125e-05	1.52925e-05	1.89728e-05	1.49119e-05	1.4498e-05	1.69156e-05
Fibrisoma	2.4019e-05	1.97719e-05	2.8981e-05	1.9732e-05	2.18361e-05	2.59412e-05	2.60138e-05	2.16098e-05	2.53653e-05	2.57877e-05	2.74912e-05	2.68952e-05	2.63478e-05	2.25729e-05	2.73162e-05	2.4843e-05	2.76521e-05	2.55171e-05	2.6395e-05	2.516e-05	2.63415e-05	1.85855e-05	1.78043e-05	2.32468e-05
Fibrobacter	3.28172e-05	3.23917e-05	3.89523e-05	3.90339e-05	4.35202e-05	4.05506e-05	4.07927e-05	3.68663e-05	2.94769e-05	3.23597e-05	2.82249e-05	2.70676e-05	3.86329e-05	3.1293e-05	4.32964e-05	4.32988e-05	2.1424e-05	2.4922e-05	2.04342e-05	2.1563e-05	1.69729e-05	1.35893e-05	2.35781e-05	2.20765e-05
Fibroporia	0	0	0	0	0	0	0	0	0	0	0	2.52136e-07	1.68773e-07	4.19954e-07	0	4.76281e-07	2.75644e-07	0	1.99786e-07	5.04136e-07	3.95141e-07	9.95531e-07	5.4329e-07	2.43677e-07
Fibularhizoctonia	2.39457e-07	2.85314e-07	1.09651e-07	4.75017e-07	1.14698e-07	2.19225e-07	3.52899e-07	4.71657e-08	9.5802e-07	4.23877e-07	6.45873e-07	3.88743e-07	3.93488e-08	9.39079e-07	8.81511e-07	4.19521e-07	1.33417e-07	0	7.1334e-07	5.92243e-07	0	5.4758e-07	5.25831e-07	5.28541e-07
Ficleduovirus	0	0	1.91186e-07	0	0	0	0	0	0	1.35544e-07	0	0	1.2181e-07	1.2489e-06	8.02965e-08	1.85718e-07	0	0	0	6.36746e-07	0	0	0	0
Fictibacillus	5.94447e-06	5.10053e-06	6.06419e-06	5.04437e-06	3.15419e-06	6.25433e-06	4.66472e-06	4.96661e-06	4.0031e-06	7.18381e-06	7.40935e-06	8.59835e-06	7.40843e-06	5.77262e-06	4.75961e-06	8.48209e-06	8.69897e-06	7.84333e-06	7.86952e-06	6.49078e-06	4.02016e-06	5.23332e-06	4.86712e-06	3.77439e-06
Filibacter	1.74309e-07	4.14122e-07	0	1.79109e-07	3.19405e-07	8.95574e-07	5.36992e-07	9.37834e-08	2.90533e-07	7.97683e-07	4.1885e-07	2.58169e-07	2.73424e-07	3.47088e-07	1.35595e-07	1.37657e-07	7.56603e-07	2.83435e-07	1.06552e-07	0	6.70366e-07	0	4.82836e-07	8.15141e-07
Filifactor	0	0	9.09297e-08	3.875e-07	0	0	0	0	0	0	0	0	0	0	0	0	0	0	0	0	0	0	0	0
Filimonas	9.87124e-05	0.000141168	0.000150161	0.000139344	0.000152631	0.000168078	0.00014059	0.00014089	9.94266e-05	9.70837e-05	9.40562e-05	0.00010114	0.000127406	0.000108472	0.000111366	0.000116069	0.000107608	9.54437e-05	8.99489e-05	9.72261e-05	0.000125948	8.19752e-05	9.05389e-05	0.000121291
Filobacillus	0	2.1611e-07	1.0214e-07	1.08819e-07	9.80632e-07	4.46224e-07	3.36149e-07	1.02776e-07	2.10935e-07	1.06764e-07	1.03241e-07	0	0	0	0	0	0	1.54569e-07	0	4.12928e-07	0	0	0	0
Filomicrobium	1.53535e-05	1.48398e-05	1.74239e-05	2.34896e-05	8.68092e-06	8.74269e-06	9.36192e-06	1.27963e-05	1.12258e-05	1.28414e-05	2.09622e-05	1.65497e-05	1.57855e-05	1.48211e-05	1.29991e-05	1.57993e-05	2.17949e-05	2.36432e-05	2.59981e-05	1.80066e-05	1.50654e-05	1.03884e-05	1.19114e-05	1.30853e-05
Fimbriiglobus	9.53086e-05	0.000107339	0.00011374	0.000133963	0.000129941	0.000128976	0.000126199	0.000113991	0.000107219	8.90379e-05	0.000101566	0.000106549	0.000102463	9.1703e-05	0.00011336	0.000111186	8.27642e-05	7.94565e-05	7.86383e-05	7.65864e-05	8.23142e-05	6.9022e-05	8.25314e-05	8.54131e-05
Fimbriimonas	0.000150883	0.00022074	0.00015961	0.000243571	0.000247156	0.000309221	0.000240375	0.000240173	0.000166991	0.000179182	0.000177429	0.000181889	0.000181301	0.000141456	0.000234286	0.00018497	7.92891e-05	5.86077e-05	7.56581e-05	6.39013e-05	0.000135858	0.000132762	0.000155098	0.000174688
Finegoldia	1.6808e-07	1.73834e-07	2.15084e-07	4.71103e-07	1.07706e-07	1.70086e-07	0	0	0	7.93985e-07	1.81605e-07	1.5373e-07	2.84865e-07	5.33339e-07	4.12457e-07	3.215e-07	1.17342e-07	6.35694e-07	0	2.41577e-07	0	0	5.89781e-07	2.70438e-07
Fipvunavirus	0	0	0	0	0	3.16634e-07	7.99735e-08	0	0	0	0	0	0	0	0	4.9296e-07	0	8.87177e-07	3.35482e-07	0	0	0	0	0
Fischerella	9.31496e-05	9.04254e-05	9.67576e-05	9.54141e-05	9.51787e-05	9.19989e-05	0.000107519	8.81332e-05	8.86817e-05	8.05829e-05	0.000103933	9.55998e-05	7.9868e-05	7.37528e-05	8.98658e-05	7.90245e-05	8.94089e-05	7.76272e-05	7.77126e-05	8.13322e-05	9.95524e-05	8.24506e-05	8.52511e-05	9.3191e-05
Fishburnevirus	4.34023e-07	1.86331e-07	1.17421e-07	0	6.73803e-08	1.14623e-07	3.8601e-08	1.48568e-07	0	1.84104e-07	1.18687e-07	0	0	2.67395e-07	0	1.14895e-07	1.76064e-07	1.34966e-06	2.38617e-07	6.61914e-07	0	1.76508e-07	0	0
Fistulina	0	0	0	3.26456e-07	0	0	0	0	0	1.02549e-07	2.862e-07	8.18435e-07	4.00234e-07	3.74191e-07	0	0	0	1.6353e-07	6.32249e-07	5.64534e-07	0	1.76836e-06	6.9896e-07	1.92011e-07
Flagellimonas	4.90944e-06	2.47581e-06	2.81816e-06	3.97913e-06	3.90208e-06	4.44818e-06	3.46527e-06	3.32201e-06	4.45642e-06	4.23461e-06	4.59757e-06	3.9081e-06	4.23777e-06	6.11801e-06	6.60332e-06	4.76795e-06	8.08884e-06	6.84525e-06	1.16683e-05	8.75417e-06	6.19439e-06	5.64637e-06	3.86369e-06	6.73098e-06
Flammeovirga	4.72862e-06	6.0977e-06	6.1328e-06	7.92047e-06	6.61688e-06	5.70516e-06	6.46028e-06	3.50934e-06	6.29227e-06	8.16944e-06	6.07431e-06	6.70493e-06	8.81984e-06	7.01518e-06	8.62059e-06	5.42246e-06	5.07588e-06	1.34317e-05	8.26397e-06	8.27306e-06	6.8561e-06	5.76641e-06	7.00262e-06	7.18676e-06
Flammulina	3.68436e-06	3.22782e-06	0	0	2.61289e-06	2.48066e-06	2.34607e-06	3.12834e-06	2.24258e-06	2.49322e-06	0	0	1.27286e-06	1.83122e-06	1.50759e-06	2.32659e-06	2.02769e-06	3.51758e-06	0	0	1.29865e-06	2.02513e-06	1.7122e-06	2.07645e-06
Flaumdravirus	0	0	0	0	0	2.53048e-07	6.39132e-08	0	0	0	0	0	0	0	0	0	0	0	0	0	0	0	0	0
Flaviaesturariibacter	6.37457e-05	3.43636e-05	7.54819e-05	5.65967e-05	5.31516e-05	7.21049e-05	6.08293e-05	5.0256e-05	6.95851e-05	8.51007e-05	8.7323e-05	7.2046e-05	7.9735e-05	6.51606e-05	9.61725e-05	7.48746e-05	7.39485e-05	6.60161e-05	6.41933e-05	5.83172e-05	8.13431e-05	5.84721e-05	6.31648e-05	7.11939e-05
Flavicella	1.10635e-07	9.98485e-08	2.83148e-07	4.09718e-07	0	0	7.45849e-07	3.83535e-07	2.07445e-07	4.93275e-07	0	6.58092e-08	3.04526e-07	0	1.02665e-07	1.98088e-07	9.18813e-08	7.51224e-07	0	9.86871e-08	0	7.88178e-08	6.06163e-07	9.05712e-08
Flaviflexus	1.49818e-06	5.92976e-07	4.42394e-07	1.66683e-06	1.51949e-06	1.37541e-06	1.2637e-06	1.05248e-06	1.62074e-06	6.15734e-07	9.63609e-07	2.42952e-07	4.1409e-07	4.78372e-07	3.39389e-07	9.31159e-07	2.99778e-06	3.27361e-06	3.79408e-06	1.59374e-06	2.3096e-06	1.15697e-06	1.57983e-06	1.04986e-06
Flavihumibacter	0.000253342	0.000237665	0.000535067	0.000233361	0.000236219	0.000283082	0.000202884	0.000202135	0.000254287	0.000288664	0.000298042	0.000286593	0.000301593	0.000237199	0.000304973	0.000286484	0.000378135	0.000327429	0.000347045	0.00029764	0.0003275	0.000248648	0.000229427	0.000294558
Flavilitoribacter	2.13027e-05	1.78897e-05	2.49023e-05	1.47284e-05	1.64153e-05	1.58089e-05	1.71535e-05	1.5938e-05	2.07002e-05	2.20745e-05	2.29944e-05	2.10947e-05	2.18267e-05	1.83489e-05	2.61854e-05	1.85518e-05	2.92725e-05	2.80245e-05	2.95295e-05	2.40444e-05	2.70369e-05	1.89264e-05	2.18118e-05	2.0362e-05
Flavimaricola	1.06906e-06	2.15837e-06	2.24741e-06	1.67737e-06	1.11797e-06	1.40576e-06	3.27094e-06	1.62426e-06	2.05417e-06	2.71294e-06	1.95541e-06	1.56388e-06	2.53538e-06	1.69914e-06	1.72429e-06	1.86505e-06	1.43015e-06	7.40917e-07	5.5679e-07	9.06899e-07	9.5002e-07	1.15269e-06	1.52291e-06	1.54705e-06
Flavimarina	7.88036e-07	9.97662e-07	5.34637e-07	4.21137e-07	8.45351e-07	6.71216e-07	7.81039e-07	6.64567e-07	1.15236e-06	7.97374e-07	9.02793e-07	2.44661e-07	6.30378e-07	7.20668e-07	2.66168e-07	7.09375e-07	6.54202e-07	4.35657e-07	4.08237e-07	1.07572e-06	1.64529e-06	4.21778e-07	5.32932e-07	9.86257e-07
Flavimobilis	4.28776e-07	6.59088e-07	1.32531e-06	1.78427e-06	1.26495e-06	1.76095e-06	1.25988e-06	1.97044e-06	1.31491e-06	1.17438e-06	1.2536e-06	2.83919e-06	1.91326e-06	9.94852e-07	1.88699e-06	1.79715e-06	2.31727e-06	2.17657e-06	1.24177e-06	1.43688e-06	2.02151e-06	1.65107e-06	1.1246e-06	1.92301e-06
Flavipsychrobacter	6.61916e-06	1.11275e-05	7.44383e-06	9.17019e-06	1.26031e-05	1.31536e-05	1.38501e-05	1.59565e-05	1.24947e-05	1.49454e-05	1.36703e-05	1.24838e-05	1.2554e-05	9.28129e-06	1.19084e-05	1.25534e-05	7.98547e-06	6.93078e-06	4.3559e-06	6.39929e-06	1.29924e-05	5.41466e-06	6.15337e-06	8.24826e-06
Flaviramulus	9.3706e-07	6.19705e-07	1.63725e-06	1.35213e-06	1.0707e-06	1.90354e-06	1.67864e-06	1.03553e-06	1.96609e-06	2.18031e-06	2.71696e-07	1.79283e-06	2.60155e-06	1.02437e-06	2.19406e-06	1.0822e-06	2.10315e-06	3.72447e-06	2.19329e-06	2.6279e-06	2.4985e-06	3.07018e-06	2.42709e-06	1.22309e-06
Flavisolibacter	0.00268905	0.00181581	0.00397144	0.00242142	0.00317586	0.00384445	0.00306177	0.00283402	0.00324101	0.00370172	0.00377097	0.00358147	0.00338748	0.00348234	0.00475314	0.0031653	0.00283629	0.00253318	0.00253639	0.0023722	0.00352861	0.00308231	0.00302124	0.00387472
Flavivirga	4.22618e-06	2.28559e-06	2.91581e-06	2.449e-06	3.29319e-06	2.46966e-06	3.81236e-06	2.4791e-06	3.81062e-06	5.13213e-06	2.77853e-06	4.80309e-06	5.00174e-06	3.71986e-06	5.90497e-06	2.53847e-06	6.04569e-06	2.06167e-06	2.26922e-06	3.60892e-06	3.75562e-06	4.46689e-06	1.63634e-06	3.28593e-06
Flavobacterium	0.000359457	0.000349139	0.000497554	0.000392976	0.000365784	0.00040446	0.000410652	0.000306504	0.000413094	0.000420351	0.000409029	0.000432607	0.000453633	0.00038054	0.000458923	0.000426374	0.000487627	0.00045202	0.000490282	0.000468523	0.000703158	0.000342791	0.000353009	0.000414364
Flavonifractor	7.72351e-07	2.29539e-06	1.55766e-06	2.21718e-06	3.34114e-06	2.64203e-06	2.59729e-06	2.32277e-06	1.45452e-06	2.06429e-06	9.67277e-07	1.39489e-06	1.49214e-06	2.38095e-06	1.94891e-06	3.29408e-06	2.18334e-06	4.65134e-07	3.37151e-07	1.56425e-06	2.64726e-06	1.63021e-06	5.46151e-07	7.75666e-07
Flectobacillus	6.30993e-06	6.44961e-06	7.30048e-06	6.28606e-06	8.02453e-06	5.70471e-06	4.61896e-06	5.84689e-06	7.11054e-06	6.15186e-06	6.64729e-06	6.09568e-06	6.82481e-06	7.80073e-06	6.37592e-06	8.77338e-06	6.00359e-06	9.40305e-06	6.78979e-06	7.34678e-06	1.2363e-05	5.19644e-06	3.12235e-06	9.48563e-06
Flexibacter	3.46068e-06	6.44972e-06	5.33402e-06	3.87872e-06	2.95043e-06	2.86245e-06	4.33013e-06	3.20711e-06	4.62524e-06	3.87748e-06	2.81084e-06	3.93314e-06	5.56544e-06	4.54434e-06	5.19377e-06	4.57566e-06	2.90582e-06	4.82224e-06	1.49604e-06	2.47995e-06	4.83901e-06	3.08106e-06	2.46517e-06	1.8974e-06
Flexilinea	2.81382e-06	2.7718e-06	2.42546e-06	2.97414e-06	2.81108e-06	3.4056e-06	2.38517e-06	1.84995e-06	1.57741e-06	2.67468e-06	2.78134e-06	2.71067e-06	3.22374e-06	1.65975e-06	2.33968e-06	3.03278e-06	1.62841e-06	2.24784e-06	1.27576e-06	2.45975e-06	1.92399e-06	5.97476e-07	1.95713e-06	1.72127e-06
Flexistipes	1.9309e-07	1.11099e-07	8.64559e-07	3.92691e-07	4.59665e-07	1.00233e-07	1.06814e-07	1.1198e-07	1.40511e-06	7.11082e-07	1.21311e-06	7.22342e-07	7.07651e-07	3.73499e-07	6.98897e-07	1.50467e-06	4.09557e-07	1.66537e-06	7.65761e-07	1.36272e-06	1.49997e-06	3.3757e-07	7.0088e-07	1.51568e-06
Flexithrix	6.61245e-06	7.17157e-06	1.19777e-05	5.71287e-06	8.18671e-06	8.52325e-06	9.36351e-06	9.05133e-06	7.62256e-06	1.06947e-05	9.56871e-06	1.08126e-05	1.03193e-05	7.29314e-06	8.80844e-06	7.45956e-06	7.26693e-06	5.71624e-06	7.89871e-06	9.37936e-06	1.11983e-05	3.17779e-06	4.40337e-06	7.36601e-06
Flexivirga	1.00016e-05	1.17669e-05	2.19883e-05	1.39231e-05	1.5171e-05	1.88667e-05	2.18457e-05	2.45721e-05	1.14732e-05	1.47296e-05	1.16823e-05	9.40226e-06	1.21283e-05	1.16492e-05	1.09758e-05	1.17409e-05	7.79543e-06	7.82865e-06	8.62395e-06	6.76605e-06	7.42436e-06	9.75783e-06	1.1351e-05	1.30389e-05
Flintibacter	2.42783e-07	0	3.10676e-07	0	0	1.07194e-07	0	1.04204e-07	0	1.08247e-07	0	9.68858e-08	0	0	9.9813e-08	0	0	6.09923e-07	0	0	0	0	0	1.29737e-07
Floricoccus	1.19728e-07	2.06656e-07	2.0428e-07	4.35274e-07	0	0	0	0	1.05468e-07	0	0	8.71972e-08	0	3.39592e-07	8.98317e-08	2.91083e-07	2.43485e-07	2.82089e-07	0	1.3076e-07	0	1.04434e-07	0	0
Fluoribacter	9.28936e-07	1.24203e-06	1.03057e-06	5.20131e-07	1.06918e-06	2.08008e-06	1.35577e-06	1.0662e-06	1.226e-06	1.54522e-06	2.31763e-06	1.28188e-06	1.0261e-06	2.2148e-06	1.88907e-06	2.81636e-06	3.11916e-07	1.12012e-06	1.13246e-06	1.11755e-06	8.47139e-07	9.95756e-07	6.63885e-07	1.24682e-07
Fluviibacterium	1.09321e-06	6.21429e-07	5.02183e-07	1.33165e-06	6.2125e-07	1.2597e-06	1.19585e-06	5.72867e-07	8.10435e-08	2.13747e-07	8.97538e-07	5.90859e-07	7.00684e-07	6.70405e-07	3.36895e-07	3.0262e-07	1.45924e-06	1.18198e-06	1.83004e-06	3.86164e-07	6.13001e-07	7.53021e-07	3.67354e-07	3.87642e-07
Fluviicoccus	6.58022e-06	8.33876e-06	8.22815e-06	6.6684e-06	5.24052e-06	7.718e-06	6.78768e-06	8.97305e-06	5.17279e-06	4.36641e-06	6.45595e-06	6.11894e-06	4.6612e-06	5.03546e-06	5.45037e-06	6.45256e-06	3.6699e-06	3.87958e-06	3.15521e-06	5.61994e-06	5.10673e-06	3.42889e-06	4.85632e-06	7.19506e-06
Fluviicola	1.67634e-05	1.40527e-05	1.7189e-05	1.81751e-05	1.21121e-05	1.40899e-05	1.09045e-05	1.27275e-05	1.71078e-05	2.3119e-05	1.75478e-05	2.27633e-05	1.7564e-05	1.76811e-05	2.14756e-05	2.1877e-05	2.10646e-05	1.77502e-05	1.77881e-05	1.63256e-05	7.20709e-05	1.58343e-05	1.35584e-05	3.53591e-05
Fluviispira	5.6307e-07	4.64619e-07	1.17228e-06	5.78153e-07	5.33548e-07	8.31425e-07	8.04454e-07	1.48251e-06	4.1477e-07	1.08281e-06	1.29959e-06	3.33146e-07	6.6892e-07	1.14992e-06	1.19409e-06	5.4641e-07	0	1.58924e-07	1.00619e-06	4.63065e-07	5.92422e-07	9.97042e-07	2.01771e-06	1.17136e-06
Fodinibius	1.95355e-06	2.36313e-06	2.33983e-06	1.59737e-06	1.94628e-06	2.01845e-06	1.33057e-06	1.61568e-06	1.3604e-06	1.36307e-06	2.9081e-06	2.20747e-06	1.97557e-06	1.66456e-06	1.72046e-06	1.414e-06	7.23817e-07	1.23761e-06	1.3342e-06	1.07951e-06	1.17111e-06	8.88538e-07	6.012e-07	7.77533e-07
Fodinicola	2.79204e-05	3.71195e-05	3.67137e-05	3.11435e-05	5.64164e-05	4.74167e-05	5.53336e-05	5.32549e-05	2.81259e-05	3.40698e-05	3.13819e-05	2.63512e-05	3.61226e-05	2.68696e-05	3.04441e-05	3.74686e-05	3.02972e-05	3.47624e-05	2.67566e-05	2.18403e-05	2.40558e-05	1.59515e-05	2.53828e-05	2.40929e-05
Fodinicurvata	8.16546e-06	1.21948e-05	7.16972e-06	8.03521e-06	7.10679e-06	6.43292e-06	9.26449e-06	8.45288e-06	6.89793e-06	9.04025e-06	1.40426e-05	1.08116e-05	7.27773e-06	6.41835e-06	6.52622e-06	9.44193e-06	1.12452e-05	8.85068e-06	1.02874e-05	5.38532e-06	4.43425e-06	7.8318e-06	5.8556e-06	5.84601e-06
Fomitiporia	0	1.57761e-07	3.48845e-07	3.13569e-07	0	1.07194e-07	0	3.9657e-07	6.91666e-07	2.83036e-07	7.82824e-07	0	2.0528e-07	4.60287e-07	1.2608e-07	7.29581e-08	3.4326e-07	8.2156e-07	1.71435e-06	4.42135e-07	5.88691e-07	1.83748e-06	3.15882e-07	5.40499e-07
Fomitopsis	9.09464e-07	1.0599e-06	7.80068e-07	8.01739e-07	6.56335e-07	4.20573e-07	4.86331e-07	1.08445e-06	2.44335e-06	3.22739e-06	4.3891e-06	2.28373e-06	4.25944e-07	1.98703e-06	5.2883e-07	6.21728e-07	1.07839e-06	1.67764e-06	2.58102e-06	3.27375e-06	4.83418e-06	6.45591e-06	3.70449e-06	2.6191e-06
Fonsecaea	5.1004e-07	8.83101e-07	1.50045e-06	7.49627e-07	6.31557e-07	2.71513e-06	1.76299e-06	9.65684e-07	6.14984e-07	2.03765e-06	1.38061e-06	5.7935e-07	5.50319e-07	2.27623e-06	5.08897e-07	6.94112e-07	4.98564e-07	8.21229e-07	6.90749e-07	1.35793e-06	3.53899e-07	6.46815e-07	1.27659e-06	7.56153e-07
Fontibacillus	5.74234e-07	2.49738e-06	1.01301e-06	1.67976e-06	8.95732e-07	5.21191e-07	2.32781e-06	5.52083e-07	1.63493e-06	3.14816e-07	9.18063e-07	2.21382e-06	8.07104e-07	1.35596e-06	2.19553e-06	1.30262e-06	1.43501e-06	4.87923e-07	1.73919e-06	1.41958e-06	1.62892e-06	1.46755e-06	7.34462e-07	2.96091e-06
Fonticella	4.43462e-07	1.25825e-06	5.39614e-07	7.15654e-08	8.95449e-08	7.23208e-07	4.40989e-07	1.07181e-07	1.06363e-06	5.3587e-07	4.47152e-07	2.98757e-07	1.06675e-06	6.92033e-08	9.79135e-07	9.53889e-07	8.77425e-08	1.01654e-07	0	3.48694e-07	2.75178e-07	5.84372e-07	7.79828e-07	2.93465e-07
Fontimonas	3.35946e-05	1.60641e-05	2.11573e-05	2.9291e-05	1.5518e-05	1.42505e-05	1.27296e-05	1.59572e-05	4.65496e-05	5.07601e-05	6.31019e-05	5.53102e-05	3.90441e-05	2.00625e-05	3.73328e-05	3.18081e-05	4.1586e-05	3.75589e-05	3.76365e-05	3.53775e-05	1.43613e-05	1.20315e-05	1.03818e-05	1.99482e-05
Formivibrio	7.25387e-06	9.45493e-06	8.15359e-06	9.69497e-06	8.76557e-06	8.1604e-06	8.10428e-06	7.06328e-06	7.45982e-06	7.7233e-06	9.93486e-06	5.61965e-06	5.73606e-06	5.89469e-06	1.0289e-05	7.43835e-06	4.59401e-06	8.86489e-06	4.56131e-06	5.20963e-06	1.08226e-05	4.89319e-06	7.57029e-06	6.78806e-06
Formosa	5.93145e-06	4.45912e-06	3.8502e-06	4.06465e-06	2.28567e-06	3.68341e-06	2.87658e-06	4.50624e-06	3.68484e-06	4.95538e-06	6.19907e-06	4.31881e-06	4.56777e-06	2.99993e-06	4.10802e-06	3.65039e-06	2.77456e-06	3.6047e-06	5.01474e-06	7.1058e-06	6.19882e-06	3.1459e-06	3.72698e-06	4.20778e-06
Fortiea	7.13509e-06	4.37648e-06	8.25335e-06	5.23772e-06	5.62394e-06	6.16422e-06	1.00435e-05	4.90728e-06	5.05662e-06	4.45444e-06	6.23221e-06	4.78539e-06	7.15562e-06	5.30727e-06	5.92641e-06	5.00719e-06	6.16073e-06	3.37699e-06	5.44932e-06	7.71795e-06	5.08623e-06	5.39855e-06	6.53554e-06	5.25568e-06
Foturvirus	0	0	0	0	0	0	0	0	0	0	1.46719e-07	9.05945e-08	0	0	9.33316e-08	0	1.26486e-07	0	0	6.06049e-07	3.43824e-07	0	3.13626e-08	1.24682e-07
Fournierella	0	3.24166e-07	0	9.57079e-08	0	2.69231e-07	0	0	0	0	0	2.52136e-07	0	0	3.26076e-07	0	0	0	0	0	0	0	0	0
Francisella	9.69088e-07	2.78386e-06	8.05741e-07	2.53054e-06	1.12612e-06	1.40506e-06	2.72899e-06	2.24615e-06	7.81631e-07	1.89507e-06	1.99873e-06	1.09641e-06	1.29108e-06	1.51802e-06	1.29115e-06	1.84124e-06	6.90633e-07	2.27465e-06	2.18254e-06	6.20523e-07	4.11808e-06	2.48841e-06	3.15504e-06	1.22651e-06
Franconibacter	6.00521e-07	1.02192e-06	5.08163e-07	6.76615e-07	7.24168e-07	5.30125e-07	3.5439e-07	3.15212e-07	4.16958e-07	6.13681e-08	3.06032e-07	1.02827e-07	9.38384e-07	5.30558e-07	6.08473e-07	6.13053e-07	1.18773e-07	6.1797e-07	4.77234e-07	5.1806e-07	2.63654e-07	3.58058e-07	1.03329e-07	1.14266e-06
Frankia	0.000555837	0.000514385	0.00458681	0.000546529	0.000722021	0.000744577	0.000767077	0.000823804	0.000484537	0.000536848	0.000422213	0.000470443	0.000440163	0.000632821	0.000420354	0.000486579	0.000482329	0.000539864	0.00045815	0.000483031	0.000359282	0.000542622	0.000531189	0.000386974
Frateuria	0.00010645	0.000132755	0.000138169	0.000160785	0.000148085	0.000155582	0.000174601	0.000156876	9.92539e-05	9.9945e-05	7.90481e-05	9.28028e-05	0.000134989	0.000157928	0.000150382	0.000148554	7.82058e-05	6.78441e-05	5.64424e-05	8.28444e-05	0.000194746	9.04192e-05	0.000149775	0.000137558
Frederiksenia	1.61855e-07	0	0	0	0	0	0	0	3.63223e-07	7.21644e-08	4.21649e-07	1.96501e-07	1.63502e-07	1.25775e-07	3.03656e-07	0	2.70539e-07	7.55164e-07	2.09158e-07	4.84298e-07	4.75642e-07	7.73582e-08	0	0
Fretibacterium	3.48508e-07	1.04742e-06	1.83037e-07	5.68163e-07	7.7656e-07	1.01647e-06	9.0915e-07	7.397e-07	6.98287e-07	3.44961e-07	1.53808e-07	8.77663e-07	9.33879e-08	5.11011e-07	7.26956e-07	6.65674e-07	2.04298e-06	1.59466e-06	1.17258e-06	1.24193e-06	1.44943e-06	1.05847e-06	1.84946e-06	7.19671e-07
Friedmanniella	1.75067e-05	2.41903e-05	4.9824e-05	2.03292e-05	3.08455e-05	3.04984e-05	3.35757e-05	3.22056e-05	1.90023e-05	2.09095e-05	1.71969e-05	1.8108e-05	2.40633e-05	2.0459e-05	2.31368e-05	2.22235e-05	1.55777e-05	1.70429e-05	1.66536e-05	1.44678e-05	1.6863e-05	1.54323e-05	1.80486e-05	1.90378e-05
Friedmanniomyces	9.82043e-08	8.93334e-07	7.57211e-07	7.001e-07	7.17067e-07	9.10993e-07	2.79032e-06	6.82807e-07	2.86938e-07	1.69732e-07	1.13925e-06	8.83009e-08	5.49928e-07	4.73579e-07	4.30581e-07	7.26406e-07	2.48148e-07	1.08292e-06	1.31275e-06	5.56503e-07	4.88533e-07	2.07141e-07	6.69006e-07	6.7372e-07
Frigidibacter	2.34833e-06	2.08039e-06	1.00263e-06	1.79802e-06	3.31754e-06	2.15934e-06	1.99948e-06	2.03299e-06	1.57165e-06	8.31889e-07	4.93148e-07	3.61722e-07	8.06789e-07	6.66747e-07	1.27907e-06	1.39541e-06	2.30019e-06	2.0487e-06	3.64388e-06	1.16641e-06	2.18267e-06	9.60014e-07	2.29224e-06	1.27917e-06
Frigoribacterium	6.58826e-06	5.45174e-06	1.34377e-05	4.32323e-06	8.01604e-06	8.44147e-06	8.02926e-06	9.58388e-06	5.42897e-06	7.30021e-06	5.27252e-06	5.09967e-06	5.52668e-06	6.02075e-06	7.78657e-06	7.30361e-06	6.01528e-06	5.55116e-06	6.52951e-06	4.89158e-06	4.40735e-06	2.50835e-06	4.27317e-06	5.09188e-06
Frischella	0	0	3.24184e-07	0	0	0	0	0	0	0	0	0	0	0	0	0	0	0	0	0	0	0	0	0
Frisingicoccus	0	0	0	0	0	0	0	0	0	0	8.73809e-07	0	0	0	0	0	0	0	0	0	0	0	0	0
Fromanvirus	1.59713e-06	8.2269e-07	8.08778e-07	1.34228e-07	2.00047e-07	3.47655e-07	5.6503e-08	4.9897e-07	4.82096e-07	5.57323e-07	7.79648e-07	1.13339e-06	1.27106e-06	6.66285e-07	1.46498e-06	1.41483e-06	8.32519e-07	5.94902e-07	2.36167e-07	6.87503e-07	1.324e-06	4.29059e-07	6.87276e-07	1.69137e-06
Frondihabitans	3.58832e-06	5.40697e-06	1.30792e-05	4.6939e-06	5.94197e-06	7.87982e-06	8.55505e-06	7.64497e-06	2.87129e-06	2.96168e-06	4.78579e-06	3.50727e-06	3.11847e-06	3.79589e-06	4.20672e-06	3.22247e-06	1.58962e-06	1.81132e-06	1.09399e-06	2.24035e-06	1.7162e-06	8.28712e-07	3.1812e-06	2.68604e-06
Fructobacillus	0	0	0	3.1775e-07	0	0	0	0	1.01163e-08	0	6.11076e-07	0	0	0	0	0	0	0	0	4.54819e-07	0	0	0	4.43746e-07
Fuerstia	2.24337e-05	2.23969e-05	2.58731e-05	3.01671e-05	2.57253e-05	2.23331e-05	2.14591e-05	2.09765e-05	2.61824e-05	2.74625e-05	2.79553e-05	2.80758e-05	2.45284e-05	2.54793e-05	3.06469e-05	2.60946e-05	2.31348e-05	2.60315e-05	1.96936e-05	1.91809e-05	2.74273e-05	1.71921e-05	1.69236e-05	2.40521e-05
Fulvimarina	6.62335e-06	5.15468e-06	6.78713e-06	7.6676e-06	6.51316e-06	7.21129e-06	7.5644e-06	6.64485e-06	4.46044e-06	6.40373e-06	8.51363e-06	5.8883e-06	6.67717e-06	5.35404e-06	6.81737e-06	4.79321e-06	1.09871e-05	7.83709e-06	8.10528e-06	6.42148e-06	5.21883e-06	4.91143e-06	4.80881e-06	4.30165e-06
Fulvimonas	2.4491e-05	2.5987e-05	2.69644e-05	3.43003e-05	3.18879e-05	3.24568e-05	3.11113e-05	3.20068e-05	2.24916e-05	2.62009e-05	1.78022e-05	1.98994e-05	3.21474e-05	3.41768e-05	3.51938e-05	3.61853e-05	1.0335e-05	9.36634e-06	1.56198e-05	1.2321e-05	2.24688e-05	1.40025e-05	2.11661e-05	2.32176e-05
Fulvivirga	3.14078e-05	4.16458e-05	3.8332e-05	3.28021e-05	3.1374e-05	2.99971e-05	4.70984e-05	3.2738e-05	4.00068e-05	5.6285e-05	3.70367e-05	3.7302e-05	3.76818e-05	3.37502e-05	3.55786e-05	3.32155e-05	3.65347e-05	2.92395e-05	3.44198e-05	3.50079e-05	3.71776e-05	1.89491e-05	2.12712e-05	2.78573e-05
Fundicoccus	0	0	0	0	0	0	0	0	0	0	0	0	0	0	0	2.70215e-07	0	0	0	0	0	0	0	0
Funneliformis	2.27018e-07	2.9256e-07	7.93216e-08	4.87843e-07	7.2398e-08	0	0	0	8.27168e-07	2.21126e-06	5.45946e-07	5.58062e-08	1.64158e-07	0	1.86663e-07	0	0	2.8566e-07	0	0	0	0	2.76243e-07	1.21526e-07
Furculomyces	0	0	2.94325e-07	0	0	0	2.96104e-07	0	0	0	0	5.91167e-08	0	0	0	0	0	2.8687e-07	0	0	0	7.08024e-07	0	0
Fusarium	1.96772e-06	6.31768e-06	5.2928e-06	4.87089e-06	5.01101e-06	9.62206e-06	5.96851e-06	9.79352e-06	1.07647e-05	6.5547e-06	1.03374e-05	1.04939e-05	8.3913e-06	1.21722e-05	5.77419e-06	8.79956e-06	5.99685e-06	7.82987e-06	7.28667e-06	1.47436e-05	7.95897e-06	1.51882e-05	9.79616e-06	5.34311e-06
Fusibacter	4.81001e-07	3.33427e-07	6.30514e-07	9.79793e-07	1.22095e-06	7.58541e-07	1.4141e-06	8.0055e-07	2.15624e-07	1.12953e-07	0	9.55586e-08	2.72324e-07	1.30604e-06	2.9506e-07	1.05736e-07	0	4.57442e-07	8.2565e-07	2.82725e-07	1.27896e-07	5.83588e-07	4.98191e-07	1.39138e-07
Fusicatenibacter	1.48139e-07	6.68477e-08	0	3.09497e-07	0	1.18059e-07	1.62094e-07	2.54328e-07	0	0	0	0	0	0	3.04514e-07	6.18289e-08	4.86971e-07	0	0	0	0	0	0	0
Fusobacterium	1.38349e-06	1.93391e-06	2.31233e-06	2.37095e-06	2.81389e-06	2.46657e-06	2.26024e-06	1.43333e-06	1.37445e-06	2.65649e-06	2.44645e-06	1.65203e-06	1.69438e-06	1.00829e-06	1.97415e-06	2.66441e-06	2.93353e-06	5.8082e-07	1.20677e-06	1.58907e-06	2.50941e-06	2.26142e-06	2.34436e-06	1.15691e-06
Gaetbulibacter	1.31473e-05	5.73062e-06	1.38376e-05	1.34414e-05	8.29657e-06	9.85075e-06	7.71159e-06	7.24007e-06	1.53149e-05	1.53605e-05	1.83954e-05	1.45088e-05	1.47505e-05	1.15867e-05	1.47413e-05	1.68044e-05	2.10686e-05	2.19701e-05	2.67943e-05	2.25996e-05	2.02041e-05	1.64993e-05	1.44059e-05	1.49785e-05
Gaeumannomyces	5.27945e-07	6.91932e-08	1.93014e-07	2.10884e-07	5.67117e-07	2.14388e-07	7.73903e-07	5.16144e-07	3.23523e-07	6.93799e-07	1.6151e-07	1.93772e-07	3.83223e-07	8.22411e-07	1.48594e-07	1.27997e-07	6.26025e-07	1.4283e-07	4.3074e-07	1.09214e-06	4.27234e-07	6.16191e-07	1.10969e-07	1.21526e-07
Gaiavirus	0	1.09234e-06	0	0	8.40174e-08	0	0	0	6.75362e-08	6.83662e-08	0	0	1.22879e-07	0	0	2.55993e-07	0	0	0	0	0	0	0	0
Gaiella	0.00035127	0.000402677	0.000380793	0.00036679	0.00040388	0.000407993	0.000407126	0.00044185	0.000443343	0.00044256	0.000425113	0.000407447	0.000471265	0.000405957	0.000437911	0.000434761	0.000279632	0.000222525	0.000851231	0.000235541	0.000332148	0.000285304	0.000387432	0.000359199
Gajwadongvirus	0	0	0	0	0	0	0	0	2.04402e-07	6.89713e-08	0	6.17325e-08	0	0	0	0	0	0	0	0	0	0	0	0
Galactobacillus	2.77056e-07	0	1.31969e-07	4.21792e-07	0	0	0	1.4846e-07	0	0	0	0	3.09916e-08	2.40419e-07	0	0	0	0	0	0	0	0	0	0
Galactobacter	2.30898e-07	6.70716e-07	4.83384e-07	2.48242e-07	6.41556e-07	1.29096e-07	6.84101e-08	8.87773e-07	5.43749e-07	8.96917e-07	7.32199e-07	9.85363e-07	1.16182e-06	4.15562e-07	2.9656e-07	5.09003e-07	1.75644e-06	4.1803e-07	1.60469e-06	3.31853e-07	9.44684e-07	8.05817e-07	6.24222e-07	8.33149e-07
Galactomyces	0	0	0	0	0	0	0	0	9.62391e-08	9.74219e-08	0	0	1.75102e-07	3.39592e-07	0	0	4.86971e-07	4.23134e-07	2.82364e-07	3.92281e-07	1.1031e-07	6.26602e-07	4.32781e-07	2.40014e-07
Galaxyvirus	0	0	0	0	0	0	0	0	0	1.37943e-07	6.66956e-08	0	5.57848e-07	3.49689e-07	6.35976e-08	1.29129e-07	8.61895e-08	0	0	0	2.92469e-07	1.47871e-07	4.5959e-07	4.24803e-07
Galbibacter	2.55594e-06	2.64643e-06	3.58946e-06	3.49405e-06	1.56236e-06	2.32836e-06	2.84834e-06	1.47702e-06	3.12875e-06	3.1691e-06	3.08357e-06	2.99418e-06	3.29119e-06	1.39523e-06	2.2947e-06	1.95455e-06	4.57273e-06	5.22185e-06	5.99062e-06	2.86445e-06	4.11763e-06	1.72536e-06	2.9858e-06	2.89981e-06
Galbitalea	1.58112e-06	1.22219e-06	1.16972e-05	2.19675e-06	3.29841e-06	1.7798e-06	1.92305e-06	1.8202e-06	1.03883e-06	1.50959e-06	1.57443e-06	2.16346e-06	1.54681e-06	1.30583e-06	2.8514e-07	1.40583e-06	2.14788e-06	1.4654e-07	2.63399e-07	1.11796e-06	9.21557e-07	7.11359e-07	2.13719e-07	5.23666e-07
Galerina	5.53176e-07	2.56848e-06	6.60679e-07	7.03877e-07	4.29513e-07	9.76957e-08	4.93507e-07	3.78549e-07	1.09988e-07	1.33034e-06	1.0292e-06	2.52136e-07	1.77319e-07	4.78478e-07	9.09688e-08	6.82167e-07	7.39703e-07	1.27917e-06	3.37151e-07	1.22437e-06	1.03408e-06	3.21889e-06	1.85406e-06	6.17682e-07
Gallaecimonas	3.3811e-06	5.21139e-06	6.5679e-06	5.11411e-06	4.53958e-06	6.24614e-06	5.57446e-06	6.76811e-06	6.40201e-06	5.51933e-06	4.87103e-06	7.37702e-06	7.71768e-06	4.65291e-06	7.29711e-06	6.0809e-06	7.98045e-06	7.02221e-06	3.08554e-06	6.84636e-06	4.57624e-06	2.92355e-06	4.29389e-06	3.30834e-06
Gallibacterium	5.40473e-07	1.08494e-06	3.22721e-07	7.74565e-07	1.82497e-07	1.41614e-07	6.61388e-07	9.6675e-08	2.09039e-07	1.9731e-07	1.93246e-07	6.94125e-07	1.10443e-06	1.88446e-07	7.995e-07	4.31705e-08	0	2.8566e-07	0	1.05993e-06	4.46827e-07	6.93038e-07	9.93647e-07	0
Gallicola	1.31103e-07	2.07616e-06	7.68684e-08	7.0092e-07	3.44578e-07	8.77041e-08	0	9.49705e-08	3.84956e-08	0	1.57519e-06	2.28298e-07	2.10123e-07	3.39592e-08	0	1.73804e-07	2.0272e-07	2.1939e-07	5.82193e-07	0	0	5.5975e-07	3.32908e-07	0
Gallionella	5.03303e-05	5.83311e-05	5.42883e-05	4.89155e-05	5.0856e-05	5.09862e-05	4.73927e-05	5.22418e-05	5.18298e-05	4.45558e-05	5.13526e-05	4.83558e-05	5.60367e-05	4.39136e-05	4.55925e-05	4.70947e-05	5.31516e-05	4.96684e-05	4.458e-05	5.27178e-05	3.63462e-05	4.05336e-05	4.28407e-05	4.78237e-05
Gamaleyavirus	0	0	3.10676e-07	2.2066e-07	3.59944e-07	0	1.35511e-07	1.3644e-06	0	1.37657e-07	0	0	1.66287e-06	6.65356e-07	7.40774e-07	8.60945e-07	0	0	0	0	0	2.32075e-07	0	0
Gamarada	0	3.66283e-07	0	0	0	0	0	8.82667e-08	0	0	0	0	0	0	0	0	0	0	0	4.3234e-07	0	0	0	0
Gammaretrovirus	1.19728e-07	2.95075e-07	0	0	1.54668e-07	6.83151e-07	9.62643e-08	1.88034e-07	8.74901e-08	4.42827e-07	3.14025e-07	0	1.75538e-07	2.3821e-07	1.6333e-07	9.99426e-08	0	0	4.26209e-07	0	1.00282e-07	9.49396e-08	5.17297e-07	2.9024e-07
Gammasphaerolipovirus	0	0	0	0	0	0	0	0	0	0	0	0	0	0	4.92228e-07	0	0	0	0	0	0	0	0	0
Gammatectivirus	0	6.68477e-08	3.15942e-07	0	1.15346e-07	0	0	0	0	0	0	0	0	0	0	0	0	0	0	0	0	0	0	0
Gandjariella	1.73886e-05	1.61719e-05	2.61744e-05	1.86515e-05	2.0165e-05	2.41802e-05	2.20676e-05	2.19106e-05	1.5167e-05	1.23716e-05	1.44516e-05	1.50775e-05	1.67697e-05	1.64983e-05	1.38452e-05	1.8459e-05	1.26724e-05	1.37096e-05	1.19629e-05	1.24504e-05	1.27211e-05	1.06615e-05	1.32626e-05	1.0593e-05
Ganoderma	2.99024e-07	1.84046e-07	4.0191e-07	2.72945e-06	9.3393e-07	1.11666e-06	2.93956e-07	1.4975e-06	5.97842e-07	5.2487e-07	3.96954e-07	8.08338e-07	4.25107e-08	1.39892e-06	0	8.89555e-07	5.14441e-07	8.56834e-07	0	2.19942e-06	1.97691e-06	2.69022e-06	1.88147e-06	3.99487e-07
Garciella	1.53336e-07	0	4.10873e-07	0	3.58179e-07	6.13442e-07	4.78788e-07	2.63252e-07	1.35072e-07	6.83662e-08	0	6.47099e-07	0	4.7662e-07	0	1.27997e-07	0	0	0	0	0	0	0	0
Gardnerella	1.28532e-07	0	1.3474e-07	2.3364e-07	1.58716e-06	1.64212e-07	0	4.63128e-07	8.40199e-07	3.8479e-07	5.16964e-07	3.67953e-07	2.98162e-07	2.57924e-06	1.71108e-07	6.15513e-07	9.43932e-07	5.5645e-06	1.09274e-06	1.74261e-06	1.29777e-07	4.10694e-07	1.17355e-06	2.52646e-07
Garicola	1.50693e-07	6.80003e-08	0	3.01662e-07	3.0472e-07	0	1.34438e-07	9.49705e-08	2.92372e-07	4.70313e-07	6.49707e-08	0	4.39821e-07	0	1.23906e-07	4.88357e-07	4.92361e-07	1.39303e-07	4.18316e-07	9.01796e-08	0	7.20232e-08	2.11466e-07	0
Gayadomonas	1.05939e-06	4.38402e-07	1.46272e-06	6.07782e-07	5.43842e-07	4.01044e-07	7.79221e-07	3.33867e-07	0	1.15873e-06	4.62441e-07	5.7732e-07	2.66328e-07	1.34916e-07	8.6433e-07	6.98086e-07	5.72907e-07	5.66378e-07	0	1.29146e-07	3.47457e-07	1.12901e-07	5.44406e-07	3.78e-07
Geitlerinema	2.31856e-05	2.04683e-05	2.3029e-05	1.87852e-05	2.36544e-05	2.62607e-05	2.03208e-05	1.93332e-05	1.96405e-05	2.11345e-05	2.54019e-05	1.99464e-05	2.24756e-05	1.88958e-05	1.83144e-05	2.26126e-05	1.6825e-05	1.68588e-05	1.37212e-05	1.45269e-05	2.04735e-05	1.81609e-05	2.18535e-05	1.89837e-05
Gelasinospora	0	0	0	0	1.29217e-07	0	4.93507e-08	0	9.74573e-08	0	0	0	0	4.29863e-08	9.09688e-08	6.00288e-07	0	0	0	0	0	2.11511e-07	0	0
Gelatoporia	1.27329e-06	1.99481e-06	2.03952e-06	1.41608e-06	7.63362e-07	1.01433e-06	1.17058e-06	1.78631e-06	2.29825e-07	9.84704e-07	2.72021e-06	1.58973e-06	1.10316e-06	2.03159e-06	8.33922e-07	1.97866e-07	7.09294e-07	9.89286e-07	6.15268e-07	1.00171e-06	1.0479e-06	1.57276e-06	1.24903e-06	1.41185e-07
Gelidibacter	9.2014e-06	8.3104e-06	8.3737e-06	7.72263e-06	7.91608e-06	1.20005e-05	9.13354e-06	7.93559e-06	1.13416e-05	1.39864e-05	1.20501e-05	1.00546e-05	8.74822e-06	8.22224e-06	9.83417e-06	1.1748e-05	1.02877e-05	1.13112e-05	7.65311e-06	8.00358e-06	1.20189e-05	1.03621e-05	1.0179e-05	1.3234e-05
Gellertiella	1.36938e-06	3.19727e-06	3.49672e-06	2.28804e-06	3.29826e-06	6.59428e-07	1.78311e-06	5.46673e-07	2.01313e-06	1.71358e-06	2.86515e-06	1.49996e-06	2.35116e-06	1.1242e-06	1.42258e-06	1.96734e-06	2.5187e-06	5.64664e-06	3.0228e-06	3.39245e-06	9.44264e-07	1.62671e-06	1.14393e-06	1.29742e-06
Gelria	3.29818e-08	0	2.81367e-08	2.86261e-07	0	0	0	0	3.14811e-07	2.35283e-07	6.89384e-07	9.98874e-07	0	1.83563e-07	3.78239e-07	9.32594e-08	0	4.1791e-07	1.66096e-07	1.88483e-07	0	0	7.79785e-08	2.59474e-07
Gemella	5.6226e-07	3.1511e-07	2.20462e-07	0	1.33826e-07	0	1.70098e-06	0	1.14912e-07	1.02549e-07	1.41506e-07	0	6.27232e-07	4.41028e-07	0	0	0	0	0	0	0	2.1986e-07	0	3.78969e-07
Geminicoccus	3.47636e-05	3.72069e-05	4.41069e-05	4.0797e-05	3.4388e-05	2.83515e-05	3.79412e-05	3.48618e-05	3.8334e-05	3.14058e-05	3.93367e-05	3.61519e-05	3.84137e-05	3.23081e-05	3.45547e-05	3.32449e-05	4.91746e-05	4.52238e-05	3.68867e-05	4.54162e-05	4.031e-05	3.41512e-05	4.28741e-05	4.07973e-05
Geminisphaera	7.70484e-06	7.32082e-06	7.8955e-06	1.21421e-05	7.74755e-06	1.3753e-05	9.85349e-06	1.04212e-05	9.4843e-06	8.11677e-06	8.67848e-06	6.47034e-06	1.05238e-05	7.59911e-06	5.67803e-06	1.02358e-05	7.35716e-06	8.15522e-06	7.88934e-06	1.15602e-05	5.4753e-06	8.67918e-06	6.56695e-06	5.48385e-06
Geminocystis	6.66947e-06	3.48381e-06	5.55733e-06	5.88303e-06	4.55287e-06	5.0013e-06	6.40388e-06	3.18299e-06	7.12626e-06	5.31906e-06	6.82386e-06	5.34221e-06	6.13621e-06	3.30537e-06	5.33738e-06	7.89093e-06	5.29484e-06	7.90261e-06	8.62299e-06	6.01439e-06	7.57071e-06	6.84104e-06	4.65262e-06	5.51511e-06
Gemmata	0.000160142	0.000187964	0.000207708	0.000205602	0.000210549	0.000201614	0.000205588	0.000193318	0.000173698	0.000175325	0.000186816	0.000178135	0.000183354	0.000157156	0.000184332	0.000177797	0.000163732	0.000155068	0.000157413	0.000140302	0.000159504	0.00014282	0.00015599	0.000164868
Gemmatimonas	0.00273072	0.00247588	0.00261192	0.0026225	0.00279105	0.00281505	0.00258766	0.0023021	0.00219625	0.00228797	0.00224892	0.00226261	0.00259367	0.00251159	0.00280339	0.00270194	0.00214462	0.00197	0.00185458	0.00197421	0.00286186	0.0020679	0.00233964	0.00251611
Gemmatirosa	0.00513498	0.00475427	0.00526535	0.00481987	0.0058629	0.00575247	0.0056281	0.00496438	0.00387486	0.0040006	0.00400817	0.00392906	0.00470906	0.00481041	0.00551521	0.00498773	0.00313303	0.00289355	0.00254761	0.00296704	0.00525049	0.00383095	0.00443111	0.00465698
Gemmiger	1.25741e-06	6.19792e-07	7.23009e-07	1.3149e-06	1.42906e-06	1.0808e-06	3.34509e-07	1.41603e-06	3.83768e-07	9.50457e-08	4.64087e-07	8.34194e-07	5.52779e-07	7.30305e-08	1.77445e-07	9.8592e-08	1.00406e-07	0	7.9539e-07	1.35855e-07	2.18874e-07	6.55667e-07	4.61518e-07	6.54466e-07
Gemmobacter	1.12319e-05	1.34086e-05	1.2983e-05	1.26668e-05	1.43519e-05	1.24918e-05	1.09616e-05	1.3058e-05	1.32863e-05	9.56409e-06	1.07521e-05	1.10938e-05	1.01814e-05	1.24172e-05	1.07742e-05	1.03044e-05	1.46483e-05	1.53045e-05	1.95471e-05	1.51054e-05	8.15951e-06	8.05499e-06	9.68125e-06	1.00441e-05
Geoalkalibacter	6.66067e-06	9.81338e-06	6.7803e-06	9.65707e-06	8.4471e-06	8.62144e-06	9.23022e-06	7.14666e-06	6.53147e-06	7.82654e-06	7.82768e-06	8.54127e-06	8.05947e-06	7.52526e-06	8.12592e-06	9.2852e-06	1.2029e-05	9.41549e-06	1.09592e-05	7.49647e-06	7.70366e-06	6.19782e-06	7.39584e-06	9.7575e-06
Geobacillus	2.11475e-05	1.74131e-05	1.60475e-05	2.2934e-05	1.88927e-05	2.03901e-05	1.87971e-05	1.87045e-05	2.29822e-05	2.30749e-05	2.04809e-05	1.77606e-05	2.13248e-05	1.51629e-05	1.85548e-05	2.35544e-05	2.32386e-05	1.70865e-05	2.24531e-05	1.517e-05	1.94875e-05	1.63338e-05	1.50968e-05	2.06837e-05
Geobacter	0.000268458	0.000289274	0.00027998	0.000294145	0.000294384	0.000275808	0.000293287	0.000256394	0.000259281	0.000257696	0.000273211	0.00026204	0.000289915	0.000244315	0.000303705	0.000281473	0.000248197	0.000225076	0.000233636	0.000212288	0.000248282	0.000218495	0.000225713	0.000255521
Geodermatophilus	0.000178449	0.000207046	0.00022824	0.000207907	0.000290033	0.000304661	0.000293197	0.000287165	0.000192571	0.000214022	0.000205253	0.000195241	0.000197019	0.000200609	0.000218273	0.000214991	0.000192105	0.000195121	0.000192649	0.000176988	0.000186003	0.000154176	0.000180845	0.000167853
Geofilum	1.20126e-06	7.76005e-07	1.34487e-06	1.95525e-06	1.16885e-06	1.7654e-06	1.42426e-06	2.34682e-06	1.55097e-06	2.04986e-06	2.16626e-06	1.28354e-06	9.37197e-07	3.41346e-07	2.14366e-06	8.96213e-07	3.17598e-06	2.55843e-06	1.92881e-06	2.51345e-06	1.53885e-06	1.78704e-06	2.01666e-06	2.39273e-06
Geoglobus	1.97757e-06	1.38338e-06	1.29034e-06	1.78798e-06	1.78541e-06	1.42742e-06	1.79166e-06	1.40751e-06	2.18671e-06	1.35801e-06	1.50972e-06	2.16763e-06	1.28285e-06	1.90957e-06	2.35363e-06	2.4126e-06	8.37187e-07	5.30562e-07	6.53857e-07	7.92863e-07	1.01586e-06	4.16798e-07	1.04162e-06	1.34107e-06
Geomicrobium	2.22208e-07	7.09003e-07	8.50045e-07	4.85412e-07	1.80675e-07	2.42326e-07	3.68904e-07	1.29151e-06	1.24711e-06	5.91912e-07	3.23315e-07	1.11414e-06	8.75672e-07	6.44478e-07	6.75354e-07	5.44266e-07	1.07272e-06	1.57841e-06	3.01987e-07	1.31509e-06	8.28431e-07	1.36615e-06	8.66978e-07	1.10606e-06
Geomonas_Khan_et_al._2020	0.000281827	0.000201373	0.000298108	0.000226282	0.000273329	0.00025921	0.000246721	0.000236392	0.000284068	0.000179687	0.000222529	0.00019074	0.00017861	0.000153097	0.000195366	0.000155989	0.000164838	0.000201795	0.000172543	0.000192707	0.000201275	0.000173047	0.000171794	0.000184078
Geomonas_Xu_et_al._2019	4.66255e-05	4.58473e-05	4.91471e-05	4.54054e-05	4.44603e-05	4.74436e-05	5.33646e-05	4.91747e-05	5.37425e-05	4.88105e-05	4.7671e-05	4.1829e-05	4.70874e-05	4.0298e-05	4.64036e-05	4.65468e-05	4.59154e-05	3.98702e-05	4.10253e-05	3.75731e-05	4.34268e-05	3.5028e-05	3.73255e-05	4.10672e-05
Geopsychrobacter	4.11583e-06	4.67851e-06	5.36579e-06	4.5028e-06	2.56709e-06	4.12745e-06	4.62931e-06	2.44021e-06	5.43555e-06	4.81771e-06	6.72145e-06	4.46703e-06	4.20139e-06	3.47012e-06	2.72831e-06	3.52112e-06	5.47078e-06	1.68147e-06	3.63919e-06	4.73093e-06	4.69143e-06	2.9988e-06	3.28145e-06	3.05273e-06
Georgenia	3.58984e-05	4.53615e-05	4.32582e-05	3.99478e-05	5.27645e-05	5.27904e-05	5.4315e-05	5.67432e-05	5.02751e-05	4.80026e-05	5.61226e-05	4.26353e-05	4.65168e-05	4.86099e-05	5.17983e-05	4.72517e-05	4.33665e-05	4.68724e-05	4.3585e-05	4.12665e-05	4.40954e-05	4.56799e-05	5.6214e-05	4.79766e-05
Georhizobium	2.51777e-06	5.38548e-06	2.0825e-06	4.06498e-06	9.54981e-07	3.02289e-06	2.77636e-06	2.15082e-05	3.12271e-06	2.5003e-06	2.31666e-06	2.84174e-06	2.72957e-06	2.35162e-06	1.86576e-06	1.75733e-06	2.08806e-06	4.67409e-06	2.36946e-06	5.47883e-06	1.29228e-06	1.59453e-06	2.39304e-06	2.79102e-06
Geosmithia	0	1.99697e-07	8.47299e-08	0	6.12578e-07	0	9.87014e-08	0	0	1.77131e-07	4.95829e-07	3.96351e-07	4.11815e-07	3.94692e-07	0	5.44667e-07	1.10675e-07	7.55547e-07	3.85041e-07	0	3.00846e-07	8.3404e-07	6.67362e-07	4.24658e-07
Geosporobacter	8.84165e-07	7.51209e-07	5.85868e-07	1.32505e-06	1.67755e-06	2.56857e-06	1.34862e-06	9.27264e-07	7.4958e-07	6.64733e-07	1.39388e-06	1.44505e-06	1.48831e-06	1.95116e-06	1.32662e-06	9.99539e-07	2.75586e-06	1.30653e-06	2.71379e-07	1.19545e-06	7.52545e-07	3.55519e-07	1.77292e-06	1.64368e-06
Geothermobacter	8.88692e-06	1.28099e-05	8.94439e-06	8.35261e-06	9.43629e-06	1.03441e-05	7.83535e-06	9.33489e-06	1.02467e-05	1.06133e-05	7.9133e-06	9.28568e-06	1.29106e-05	1.04432e-05	9.38461e-06	1.05567e-05	8.96464e-06	1.11122e-05	7.04888e-06	5.26496e-06	9.92078e-06	4.24081e-06	5.03631e-06	7.64488e-06
Geothrix	4.22491e-05	5.6378e-05	5.29193e-05	5.42569e-05	5.42517e-05	4.76119e-05	4.53527e-05	4.62666e-05	4.32162e-05	3.78368e-05	3.7924e-05	3.87435e-05	4.54265e-05	3.92272e-05	5.14655e-05	4.80132e-05	3.20868e-05	3.92358e-05	2.9585e-05	2.76143e-05	3.23072e-05	2.79855e-05	2.88737e-05	3.54891e-05
Geotoga	0	0	0	0	0	0	0	3.53067e-07	0	0	0	0	0	0	0	0	0	0	0	0	0	0	0	0
Geotrichum	2.91183e-07	0	0	0	6.73803e-08	6.83005e-08	0	1.06665e-06	3.68675e-07	5.25909e-07	2.89818e-07	1.1403e-06	9.47663e-07	3.27242e-06	2.90051e-07	5.60197e-07	5.67308e-07	2.15701e-06	2.4075e-06	2.18546e-06	3.68286e-07	4.28635e-06	1.96533e-06	7.96715e-07
Geovibrio	1.6318e-06	1.38892e-06	3.53714e-06	2.96382e-06	7.99066e-07	3.25619e-06	1.0426e-06	2.79836e-06	1.25545e-06	8.80048e-07	2.79268e-06	2.87324e-06	1.85735e-06	9.08524e-07	2.83207e-06	1.98427e-06	2.06898e-06	2.10317e-06	1.69575e-06	1.75618e-06	1.56542e-06	1.41868e-06	1.35877e-06	1.73816e-06
Ghiorsea	1.00313e-06	1.14773e-06	1.67805e-06	6.99246e-07	1.56158e-06	1.82518e-06	1.32874e-06	1.83013e-06	5.96712e-07	1.26836e-06	5.67194e-07	1.27051e-06	1.13672e-06	5.17311e-07	8.73693e-07	8.11437e-07	4.05336e-07	6.75049e-07	1.27442e-06	6.36445e-07	2.26524e-06	7.69651e-07	2.86574e-07	8.12811e-07
Ghobesvirus	0	0	0	4.59177e-08	0	2.24795e-07	0	0	1.33511e-07	4.50506e-08	2.04071e-06	4.03224e-08	4.04861e-08	7.85183e-08	0	4.21723e-08	0	0	0	0	2.75776e-07	0	9.01627e-08	0
Gibbsiella	1.60033e-06	2.12918e-06	1.04642e-06	1.09899e-06	1.86533e-06	1.37029e-06	1.23548e-06	1.09305e-06	1.1776e-06	6.54232e-07	7.58477e-07	7.35703e-07	1.20744e-06	1.06569e-06	8.74788e-07	2.06144e-06	7.489e-07	1.02625e-06	5.16733e-07	1.43956e-07	1.03933e-06	7.68888e-07	1.03058e-06	1.78251e-06
Giesbergeria	2.50408e-06	2.53988e-06	3.73897e-06	3.2223e-06	3.59741e-06	1.56026e-06	3.47531e-06	2.57973e-06	8.59257e-06	1.35129e-06	2.23196e-06	1.49616e-06	2.53849e-06	1.55107e-06	2.1684e-06	1.51809e-06	2.94399e-06	2.39428e-06	3.64156e-06	2.06149e-06	2.25538e-06	2.76059e-06	2.80616e-06	1.55121e-06
Gigaspora	1.63748e-05	4.8044e-05	3.05962e-05	2.26004e-05	1.79221e-05	7.785e-06	8.44453e-06	1.46939e-05	3.41893e-05	3.1544e-05	1.73845e-05	2.833e-05	1.39982e-05	3.22984e-05	8.30982e-06	1.91842e-05	2.12744e-05	2.15994e-05	3.2483e-05	3.74248e-05	1.17327e-05	6.78413e-05	3.92174e-05	1.50332e-05
Gilliamella	6.06439e-07	2.21479e-06	1.39346e-06	1.32746e-06	9.98052e-07	1.27529e-06	1.16223e-06	1.28378e-06	1.21652e-06	4.85153e-07	1.07914e-06	4.86765e-07	1.87117e-06	1.22403e-06	9.36736e-07	1.54802e-06	5.00057e-06	1.16784e-06	2.14015e-06	6.46372e-07	1.4522e-06	1.63066e-06	1.276e-06	1.37843e-06
Gillianvirus	0	0	2.38236e-07	0	3.00239e-07	0	0	0	1.14061e-07	5.56898e-07	1.11653e-07	0	1.55646e-07	0	5.32336e-08	3.17209e-07	0	0	0	0	0	0	0	0
Gillisia	4.04891e-06	4.27215e-06	4.80944e-06	4.76012e-06	4.90646e-06	7.08557e-06	8.24324e-06	5.9265e-06	3.14883e-06	3.60104e-06	3.76791e-06	4.32702e-06	3.67486e-06	3.2816e-06	4.37529e-06	3.28945e-06	3.84553e-06	4.3965e-06	2.79687e-06	3.31409e-06	7.23078e-06	5.37264e-06	3.77404e-06	4.81919e-06
Gilvibacter	3.52427e-07	4.50745e-07	1.57454e-07	6.40625e-08	2.21916e-07	2.92265e-07	1.08511e-06	2.20667e-07	1.87279e-07	9.025e-07	7.29348e-07	5.34972e-07	2.91837e-07	2.46092e-07	1.30503e-06	1.12745e-06	9.28377e-07	1.00746e-07	4.03377e-07	1.77762e-07	1.81621e-07	1.34753e-07	1.40742e-07	6.46224e-07
Gilvimarinus	1.75982e-06	1.81004e-06	2.05405e-06	1.97973e-06	1.21842e-06	1.24437e-06	1.8531e-06	1.17713e-06	4.57366e-06	3.06185e-06	5.29452e-06	2.91436e-06	5.25845e-06	2.04167e-06	2.54896e-06	4.36571e-06	3.06655e-06	4.64906e-06	1.75289e-06	2.33731e-06	2.66447e-06	1.53635e-06	1.70634e-06	2.79314e-06
Gimesia	2.00563e-05	2.62317e-05	2.65666e-05	2.72385e-05	2.15825e-05	2.32533e-05	2.48909e-05	2.22071e-05	2.21548e-05	2.3426e-05	2.02489e-05	2.27543e-05	2.47231e-05	2.15151e-05	2.37024e-05	2.30874e-05	1.90164e-05	1.63083e-05	2.7046e-05	1.76395e-05	2.14749e-05	1.37814e-05	1.95039e-05	2.01502e-05
Glaciecola	2.60851e-06	3.42967e-06	5.13933e-06	3.89685e-06	3.34862e-06	4.41575e-06	4.47727e-06	1.65718e-06	5.93829e-06	5.43516e-06	3.51042e-06	3.44821e-06	4.68024e-06	3.77e-06	3.42974e-06	4.3843e-06	5.36194e-06	5.39475e-06	3.35396e-06	5.95641e-06	1.10181e-05	3.18819e-06	2.26101e-06	7.34927e-06
Glaciibacter	6.33689e-06	3.27471e-06	4.51456e-06	7.12463e-06	3.04123e-06	3.74507e-06	2.66857e-06	6.0794e-06	8.56746e-06	1.43452e-05	4.83936e-06	1.36652e-05	9.99695e-06	0.000178351	8.83012e-06	9.21229e-06	8.18346e-06	1.44127e-05	1.70856e-05	2.79457e-05	7.07297e-06	4.23816e-05	2.69063e-05	1.19024e-05
Glaciihabitans	1.37065e-06	3.00774e-06	4.23572e-06	2.13215e-06	3.15351e-06	3.79184e-06	2.95059e-06	5.21364e-06	1.71816e-06	4.51896e-06	2.24268e-06	2.09175e-06	3.39016e-06	1.69586e-06	1.80825e-06	2.97049e-06	5.45925e-06	3.81557e-06	4.1764e-06	2.54284e-06	2.24837e-06	1.12814e-06	1.18594e-06	1.96865e-06
Glaciimonas	4.37318e-05	4.3033e-05	4.58649e-05	4.63613e-05	4.75361e-05	4.37996e-05	4.07341e-05	4.67957e-05	4.03364e-05	3.84928e-05	4.1016e-05	3.61144e-05	3.46496e-05	3.57776e-05	4.09501e-05	3.99374e-05	3.0205e-05	2.92717e-05	2.64052e-05	3.29863e-05	3.07328e-05	2.67249e-05	3.27115e-05	3.80869e-05
Glaesserella	4.53077e-07	6.57336e-07	2.62924e-07	3.29551e-07	0	9.52834e-08	9.74676e-08	5.7494e-07	7.50593e-07	2.09172e-07	1.34822e-06	4.84781e-07	5.36545e-07	3.64564e-07	1.20055e-06	6.41424e-07	5.48808e-07	1.35947e-07	0	1.29146e-07	5.4786e-07	1.21082e-07	0	6.95692e-07
Glarea	2.44139e-07	7.58397e-08	5.6859e-08	0	2.06648e-07	8.50352e-07	5.32487e-07	6.08284e-07	1.44316e-07	8.7081e-08	4.21039e-08	5.23029e-07	1.46259e-07	5.65464e-07	2.28363e-07	3.96903e-07	0	1.09549e-07	0	5.54391e-07	8.56779e-08	0	8.40351e-08	9.69752e-08
Gleimia	1.2486e-07	0	1.19676e-06	0	0	3.40498e-07	0	0	3.39667e-07	0	6.98665e-07	0	4.37756e-07	0	0	9.11976e-08	0	0	0	0	0	0	0	2.74301e-07
Gliomastix	0	0	0	0	0	0	0	0	0	6.49479e-08	4.44722e-07	0	0	0	0	0	0	0	0	0	0	0	0	0
Globicatella	0	0	0	6.355e-07	1.45001e-07	1.02906e-07	0	0	2.99966e-07	4.12932e-07	0	1.86021e-07	9.33879e-08	9.05578e-08	0	0	0	0	1.48612e-07	0	3.48348e-07	5.21652e-07	0	2.52646e-07
Gloeobacter	8.97981e-05	9.77719e-05	9.77749e-05	9.74969e-05	9.74533e-05	0.000104011	0.000104098	9.83541e-05	7.47459e-05	8.518e-05	8.98653e-05	8.79852e-05	8.7985e-05	8.06271e-05	0.000100955	8.82252e-05	8.20315e-05	7.18901e-05	7.10642e-05	6.93244e-05	9.14876e-05	6.45192e-05	8.10316e-05	9.31289e-05
Gloeocapsa	2.46539e-05	1.68401e-05	1.61588e-05	2.07417e-05	1.95351e-05	2.19753e-05	1.71702e-05	1.66519e-05	1.7711e-05	1.5957e-05	2.25241e-05	1.85362e-05	2.22892e-05	1.78813e-05	1.70989e-05	2.18646e-05	1.98593e-05	1.90501e-05	1.91255e-05	1.76619e-05	2.06159e-05	2.05279e-05	1.88415e-05	2.10787e-05
Gloeocapsopsis	1.48473e-05	1.59896e-05	1.3802e-05	1.46158e-05	1.58831e-05	1.56495e-05	1.34962e-05	1.13563e-05	1.04537e-05	1.31765e-05	1.41557e-05	1.33992e-05	1.52978e-05	1.76904e-05	1.49515e-05	1.4069e-05	1.42915e-05	1.29989e-05	9.74518e-06	1.15039e-05	1.20101e-05	1.15039e-05	1.55976e-05	1.96036e-05
Gloeomargarita	2.4038e-06	2.66367e-06	2.413e-06	2.30766e-06	3.37308e-06	2.37167e-06	2.4252e-06	3.5e-06	1.78343e-06	1.0057e-06	3.25774e-06	2.5107e-06	2.63883e-06	1.40878e-06	3.32278e-06	3.25207e-06	1.34221e-06	1.95001e-06	8.44703e-07	1.37752e-06	1.88582e-06	1.71534e-06	1.34708e-06	1.20365e-06
[truncated: 2,485 more rows]
