# Supplementary material
Source: MDPI journal article supplement (https://www.mdpi.com/2073-4395/14/3/635)
Supplement: s1 [file s1 › Table S9.xlsx]

## Sheet: Sheet1
Table S9.	Relative species abundance of 24 samples at the species level
species	AIP1	AIP2	AIP3	AIP4	AMP1	AMP2	AMP3	AMP4	BIP1	BIP2	BIP3	BIP4	BMP1	BMP2	BMP3	BMP4	CIP1	CIP2	CIP3	CIP4	CMP1	CMP2	CMP3	CMP4
ANME-1_cluster_archaeon_AG-394-G06	6.4821e-07	4.42155e-07	1.21722e-06	1.13053e-06	1.04962e-06	4.01163e-07	8.64761e-07	2.38934e-07	6.74941e-07	2.53715e-07	3.89171e-07	5.16994e-07	3.49608e-07	3.1061e-07	3.54731e-07	7.94892e-07	2.31174e-07	0	1.56869e-07	1.06931e-06	4.66856e-07	6.16041e-07	3.07502e-07	3.99753e-07
ANME-1_cluster_archaeon_AG-394-G21	7.1905e-07	4.71463e-07	7.19806e-07	4.18291e-07	4.18946e-07	7.53324e-07	4.25319e-07	0	2.64005e-07	5.51961e-07	5.94542e-07	5.90448e-07	5.77354e-07	2.89294e-07	5.71512e-07	4.14099e-07	6.82391e-07	1.82411e-06	1.40938e-06	2.80802e-07	3.34316e-07	7.95842e-07	2.68667e-07	1.10989e-07
ANME-1_cluster_archaeon_GoMg1	9.39215e-07	7.61643e-07	1.06407e-06	1.31981e-06	1.68218e-06	2.18161e-06	1.84813e-06	1.47768e-06	2.02609e-07	1.83214e-06	1.35969e-06	1.07515e-06	8.34268e-07	4.38884e-07	7.90477e-07	1.18318e-06	5.55899e-07	8.93994e-07	7.17356e-07	1.06986e-06	7.74107e-08	1.22863e-07	1.41895e-07	6.15415e-07
ANME-1_cluster_archaeon_GoMg2	0	2.64444e-07	6.77613e-07	3.56451e-07	9.49199e-07	9.89482e-08	9.13813e-07	5.36911e-07	2.79946e-07	1.3168e-06	7.72263e-07	1.56537e-06	6.7347e-08	1.57775e-06	5.40357e-07	1.96294e-07	2.23507e-07	1.40786e-06	5.93484e-07	5.92123e-07	2.63428e-07	0	4.46798e-07	9.52136e-07
ANME-1_cluster_archaeon_GoMg3.2	4.98848e-07	6.31842e-07	1.08061e-07	1.35165e-06	5.98224e-07	1.04083e-06	1.21351e-06	6.29361e-07	1.00203e-06	1.63818e-06	6.84103e-07	4.46421e-07	1.68025e-06	1.00919e-06	5.60017e-07	1.25846e-06	6.06542e-07	7.21003e-07	1.04215e-06	9.25048e-07	3.25454e-07	4.33615e-07	1.21914e-06	7.32799e-07
ANME-1_cluster_archaeon_GoMg4	6.65741e-08	2.41183e-07	6.36799e-07	8.70058e-07	8.89541e-08	8.95284e-07	4.19066e-07	3.88617e-07	5.03991e-07	5.29459e-07	6.07293e-07	6.12116e-07	1.35918e-06	3.05055e-07	4.18126e-07	3.9344e-07	2.31891e-07	5.01492e-07	3.00387e-07	0	1.03021e-06	3.39871e-07	4.60405e-08	2.04267e-07
ANME-1_cluster_archaeon_ex4572_4	0	0	0	0	0	0	0	0	0	3.03653e-07	0	9.05945e-08	0	0	9.33316e-08	9.47508e-08	0	1.4654e-07	0	0	1.14608e-07	0	0	0
ANME-2_cluster_archaeon	1.78361e-05	1.87768e-05	1.78056e-05	1.73461e-05	2.00444e-05	2.16392e-05	1.91526e-05	1.79331e-05	1.75413e-05	1.8559e-05	2.01651e-05	2.02797e-05	1.69358e-05	1.71571e-05	1.46907e-05	1.56797e-05	1.67461e-05	2.00013e-05	1.70208e-05	1.79311e-05	2.35611e-05	1.69888e-05	1.87466e-05	1.95796e-05
ANME-2_cluster_archaeon_HR1	9.60459e-08	4.98064e-07	0	0	0	0	1.21835e-07	0	3.3112e-07	1.22688e-06	6.17754e-08	0	5.69264e-07	4.44039e-07	5.8906e-08	3.39753e-07	0	0	1.76477e-07	3.01093e-07	9.96929e-08	4.21585e-07	2.02866e-07	0
Aaosphaeria_arxii	1.4974e-07	4.85553e-07	4.34077e-07	8.7294e-08	2.99906e-07	2.1758e-07	4.13961e-07	1.29736e-06	1.84779e-07	7.02294e-07	3.38574e-07	9.6828e-07	1.93368e-07	4.91076e-07	6.56939e-07	5.83665e-08	3.95152e-07	4.6986e-07	9.79029e-07	9.05609e-07	7.46371e-07	1.47857e-06	7.71238e-07	2.46168e-07
Abditibacterium_utsteinense	2.26004e-05	2.69406e-05	2.91604e-05	3.37977e-05	3.91308e-05	3.41317e-05	3.88391e-05	2.59602e-05	2.28656e-05	2.46291e-05	2.54395e-05	2.423e-05	2.60124e-05	2.14731e-05	2.58134e-05	2.72463e-05	1.87773e-05	2.13817e-05	1.85146e-05	2.23879e-05	2.37734e-05	2.00087e-05	1.96391e-05	1.93745e-05
Abelson_murine_leukemia_virus	0	0	0	0	0	0	0	0	0	0	0	0	0	0	0	0	0	0	4.26209e-07	0	0	0	0	1.81142e-07
Abiotrophia_defectiva	0	1.85481e-07	0	0	1.9444e-07	7.35044e-08	0	2.57877e-07	2.19975e-07	2.92266e-07	0	0	0	1.78787e-07	0	0	0	0	0	0	0	0	0	0
Absicoccus_porci	0	0	0	0	0	0	0	0	0	0	0	0	0	0	0	3.12678e-07	0	0	0	0	0	0	0	0
Absidia_glauca	6.8982e-07	8.99122e-07	2.34529e-06	9.68751e-08	2.1962e-06	6.59249e-07	5.08604e-07	3.8489e-06	6.23584e-06	7.37225e-06	2.98682e-06	8.18024e-06	4.71817e-06	1.85393e-05	5.54397e-06	3.99558e-06	8.66169e-06	9.89837e-06	1.34006e-05	1.84223e-05	7.555e-06	2.62379e-05	1.55762e-05	6.51633e-06
Absidia_repens	3.33733e-07	3.84827e-07	3.57465e-07	5.00572e-07	1.368e-07	9.76957e-08	3.93315e-07	9.04253e-07	2.63324e-06	2.91335e-06	1.37633e-06	3.35609e-06	1.24604e-06	4.10025e-06	3.07014e-07	1.14977e-06	2.16152e-06	1.36604e-06	5.14895e-06	6.11233e-06	1.0727e-06	1.15155e-05	5.90162e-06	1.2754e-06
Absiella_sp._AM29-15	0	0	0	0	0	0	0	0	0	0	0	0	0	0	0	0	0	5.05235e-07	3.37151e-07	3.12264e-07	0	0	2.58377e-07	5.73167e-07
Absiella_sp._AM54-8XD	0	0	0	0	0	0	0	0	3.44737e-07	0	1.12487e-07	0	0	0	2.14523e-07	0	0	0	0	0	0	2.49394e-07	0	0
Abyssibacter_profundi	5.508e-06	3.82575e-06	4.03522e-06	3.89207e-06	4.34669e-06	4.79754e-06	3.53901e-06	3.85207e-06	8.25524e-06	5.85108e-06	8.50191e-06	9.39994e-06	7.93568e-06	2.79036e-06	8.92491e-06	3.05792e-06	8.65043e-06	7.5506e-06	9.63612e-06	8.80857e-06	3.87845e-06	2.35076e-06	3.25884e-06	5.11421e-06
Abyssicoccus_albus	0	0	0	0	0	0	0	0	0	0	0	0	0	0	0	4.6768e-07	0	0	0	0	0	0	0	0
Abyssisolibacter_fermentans	4.43946e-07	6.90288e-07	1.0795e-06	9.25652e-07	9.13266e-07	5.39032e-07	1.06113e-06	6.41254e-08	4.21011e-07	2.29031e-07	7.05216e-07	1.17028e-06	3.84859e-07	2.79752e-07	5.77485e-07	5.87747e-07	1.24541e-06	2.01279e-06	7.94127e-07	1.29255e-06	1.49504e-06	8.36923e-07	6.96244e-07	1.06125e-06
Acanthamoeba_castellanii_medusavirus	0	3.38058e-07	0	0	7.01589e-08	0	0	0	8.10435e-08	0	0	4.75087e-08	0	4.96029e-07	0	0	0	4.65302e-07	5.91998e-07	2.20228e-07	0	6.62826e-07	2.71457e-07	9.89747e-08
Acanthamoeba_castellanii_mimivirus	0	0	0	0	0	0	0	0	4.3995e-07	0	0	0	0	0	0	0	0	0	0	0	0	0	0	0
Acanthamoeba_polyphaga_lentillevirus	0	0	0	0	0	2.46318e-07	0	0	0	0	0	0	0	0	0	0	0	0	0	0	0	0	0	0
Acanthamoeba_polyphaga_mimivirus	0	0	0	0	0	0	3.39018e-07	0	0	0	2.00976e-07	0	0	2.71673e-07	0	3.9977e-07	0	0	0	1.39478e-07	0	5.35277e-07	0	1.28007e-07
Acanthocystis_turfacea_Chlorella_virus_Br0604L	0	0	0	0	0	0	0	0	0	0	0	3.13518e-07	7.86977e-08	0	8.07476e-08	1.63951e-07	0	0	0	0	0	0	0	0
Acanthocystis_turfacea_Chlorella_virus_Canal-1	0	0	0	0	0	0	0	0	0	6.77718e-08	0	1.21318e-07	0	2.95297e-07	0	0	0	1.96236e-07	1.96427e-07	0	0	7.26495e-08	0	0
Acanthocystis_turfacea_Chlorella_virus_NTS-1	0	3.94401e-07	0	0	0	0	0	0	0	0	0	0	0	0	0	0	0	0	0	0	0	0	0	0
Acanthocystis_turfacea_Chlorella_virus_TN603.4.2	0	5.99091e-07	0	0	8.61444e-08	0	0	0	0	0	0	0	0	0	0	0	0	0	0	0	0	0	0	0
Acaricomes_phytoseiuli	2.02905e-07	7.96418e-07	1.15033e-06	9.80711e-08	8.66716e-07	7.21938e-07	2.37797e-07	7.55666e-07	3.88191e-07	1.0076e-07	5.86661e-07	1.72241e-07	4.56005e-07	0	3.54891e-07	2.83495e-07	1.05863e-07	2.18706e-08	0	0	4.09741e-07	1.03144e-07	4.38075e-07	0
Acaromyces_ingoldii	0	4.0245e-07	8.77204e-08	2.93838e-07	2.95332e-07	1.77703e-07	2.18805e-07	1.43546e-07	1.92599e-07	5.50533e-07	1.73255e-07	4.10158e-07	1.8761e-07	4.86595e-07	0	0	0	8.31832e-07	3.95576e-07	3.77421e-07	0	1.25862e-06	1.10969e-07	0
Acaryochloridaceae_cyanobacterium_CSU_3_4	2.92798e-07	1.65547e-07	1.22003e-06	1.08078e-07	4.76603e-07	5.77979e-07	7.35904e-07	6.81815e-07	0	2.04072e-07	7.45097e-07	4.77437e-07	5.57945e-08	9.7232e-07	1.42318e-07	5.45531e-07	9.05457e-07	0	7.58023e-08	7.91778e-07	3.55362e-07	1.64689e-07	1.73917e-07	5.88828e-07
Acaryochloridaceae_cyanobacterium_CSU_5_19	6.85504e-07	4.20695e-07	0	0	2.48098e-07	8.86809e-07	0	0	9.5051e-08	0	8.86659e-08	2.54309e-07	3.41812e-07	0	5.1973e-07	2.57499e-07	3.5632e-07	1.11508e-06	0	0	0	5.93339e-07	2.5133e-07	2.40955e-07
Acaryochloridaceae_cyanobacterium_RL_2_7	2.00867e-06	5.4635e-07	3.62776e-07	4.57267e-07	9.72201e-08	2.47142e-07	0	3.21543e-07	3.79582e-07	7.40207e-07	1.3379e-06	7.80969e-07	5.14176e-07	7.30462e-07	2.32537e-07	7.65567e-07	0	2.07342e-07	2.87149e-07	3.07672e-07	4.20035e-07	4.52616e-07	1.05556e-07	6.39565e-07
Acaryochloridaceae_cyanobacterium_RU_4_10	6.65795e-06	6.75835e-06	6.63085e-06	6.29479e-06	6.54716e-06	5.43397e-06	4.57517e-06	5.92033e-06	5.4808e-06	5.52609e-06	6.02267e-06	5.43236e-06	5.89432e-06	6.67909e-06	6.35003e-06	5.20006e-06	5.45039e-06	5.70859e-06	6.29837e-06	5.69916e-06	7.82131e-06	5.52807e-06	7.6836e-06	6.80559e-06
Acaryochloridaceae_cyanobacterium_SU_2_1	8.24909e-07	1.84028e-06	8.88726e-07	7.27443e-07	1.13487e-06	4.2016e-07	2.97556e-07	7.15861e-07	6.88169e-07	2.87491e-07	4.17113e-07	2.69612e-07	3.96311e-07	1.97797e-07	1.86804e-07	2.33214e-07	9.93818e-08	1.45636e-06	7.57828e-07	0	4.18607e-07	3.09433e-07	3.46225e-07	6.33964e-07
Acaryochloris_marina	3.35153e-06	6.1585e-06	6.30249e-06	5.98111e-06	5.94587e-06	4.96156e-06	5.5642e-06	6.19992e-06	5.5229e-06	7.76019e-06	6.4014e-06	6.67605e-06	5.61697e-06	7.50206e-06	7.7132e-06	6.8207e-06	7.53393e-06	5.97321e-06	5.30384e-06	4.28461e-06	5.9586e-06	3.91627e-06	6.31845e-06	9.70239e-06
Acaryochloris_sp._CCMEE_5410	6.15296e-06	6.36374e-06	7.18112e-06	8.11333e-06	5.92607e-06	3.98457e-06	6.02145e-06	6.15842e-06	5.7442e-06	4.09543e-06	7.96255e-06	6.20926e-06	6.41164e-06	4.95139e-06	9.55854e-06	5.63364e-06	6.56522e-06	6.78457e-06	4.87387e-06	5.12679e-06	8.63555e-06	3.51324e-06	5.93139e-06	3.48416e-06
Acaryochloris_sp._CRU_2_0	5.52772e-06	4.01016e-06	4.00469e-06	3.42226e-06	2.66496e-06	3.51764e-06	2.98933e-06	3.2925e-06	4.13949e-06	5.08396e-06	2.48138e-06	3.70782e-06	4.96899e-06	3.96228e-06	2.27441e-06	3.84968e-06	6.8982e-06	9.51619e-06	4.50474e-06	3.16071e-06	5.99295e-06	3.00963e-06	4.42914e-06	6.59294e-06
Acaryochloris_sp._RCC1774	6.33976e-06	5.35014e-06	5.32401e-06	5.64976e-06	7.38361e-06	6.16705e-06	5.86977e-06	6.46563e-06	7.50551e-06	5.0131e-06	6.47529e-06	5.95219e-06	7.69501e-06	6.72001e-06	7.69096e-06	4.87902e-06	4.26377e-06	4.67965e-06	6.3048e-06	2.09089e-06	4.59056e-06	3.32549e-06	3.70706e-06	4.29779e-06
Acaryochloris_sp._RU_4_1	1.48848e-06	1.18356e-06	1.64985e-06	1.37455e-06	1.92921e-06	2.07568e-06	1.60379e-06	1.7562e-06	1.95945e-06	2.62766e-06	1.97851e-06	2.1557e-06	1.56438e-06	1.37198e-06	1.40519e-06	9.95964e-07	2.6954e-06	2.02381e-06	7.20913e-07	1.34474e-06	2.08917e-06	1.34118e-06	4.83191e-07	1.10658e-06
Acaryochloris_sp._SU_5_25	1.33438e-07	3.19785e-07	1.07335e-06	2.90625e-07	1.81622e-07	0	2.38089e-07	1.72475e-07	2.15624e-07	3.03044e-07	0	4.36491e-07	1.01509e-07	2.17089e-07	3.76549e-07	2.11473e-07	0	5.45908e-07	1.46378e-06	6.27917e-07	4.91308e-07	6.13563e-07	9.69931e-07	1.1708e-07
Acetanaerobacterium_elongatum	3.84184e-07	0	3.28952e-07	1.74588e-07	0	1.00233e-07	0	0	0	0	0	0	0	7.46356e-08	7.19351e-07	4.11032e-07	4.189e-07	2.42657e-07	4.85787e-07	2.24964e-07	1.14608e-07	0	0	1.03232e-07
Acetatifactor_muris	2.30005e-07	0	9.81084e-08	3.26456e-07	2.68635e-07	0	1.13006e-07	3.94877e-07	2.12886e-07	5.33554e-07	9.26496e-07	0	2.76477e-07	2.68099e-07	0	0	7.09297e-07	0	2.97225e-07	1.37643e-07	0	2.1986e-07	0	1.26323e-07
Acetitomaculum_ruminis	0	0	0	1.74588e-07	1.49569e-07	3.39251e-07	3.52582e-07	2.47341e-07	1.69212e-07	2.56937e-07	0	7.66569e-08	0	7.46356e-08	4.42062e-07	3.20695e-07	1.07027e-07	2.70535e-07	0	1.14954e-07	1.93952e-07	9.18098e-08	9.51167e-08	4.19806e-07
Acetivibrio_ethanolgignens	8.40402e-08	3.79232e-07	7.16946e-08	3.17411e-07	5.5403e-07	4.45267e-07	2.999e-07	3.60705e-07	1.4806e-07	4.73556e-07	7.24673e-08	6.70748e-08	4.71429e-07	6.53061e-08	0	0	0	0	0	0	0	0	0	0
Acetoanaerobium_noterae	0	6.21105e-08	0	2.92171e-07	0	6.07713e-08	6.13969e-08	2.02923e-07	6.06231e-08	2.0787e-07	3.41966e-07	2.29322e-07	5.71096e-07	3.20874e-07	6.96292e-07	4.41437e-07	0	4.57442e-07	0	0	0	7.23254e-07	1.36309e-07	0
Acetoanaerobium_sticklandii	0	1.12686e-07	0	0	3.88881e-07	1.10257e-07	0	1.07181e-07	0	0	0	0	2.00117e-07	0	0	0	1.39135e-07	0	0	0	1.26069e-07	0	0	0
Acetobacter_aceti	2.1307e-06	1.95348e-06	1.6118e-06	7.87878e-07	2.74481e-06	2.29642e-06	1.32932e-06	1.32938e-06	3.19057e-06	1.39193e-06	2.68281e-06	1.18422e-06	1.34251e-06	1.85945e-06	1.01026e-06	3.3543e-07	3.26064e-06	3.69963e-06	1.65998e-06	2.18071e-06	2.093e-06	1.23764e-06	1.11245e-06	3.33114e-06
Acetobacter_ascendens	8.5688e-08	3.19785e-07	0	1.05917e-07	9.07388e-08	2.08593e-07	0	0	0	0	1.47776e-07	0	0	1.81116e-07	0	0	0	7.03564e-07	1.10731e-07	5.57911e-07	1.04077e-06	8.19087e-08	0	0
Acetobacter_cerevisiae	3.28857e-07	3.95148e-07	4.98373e-07	1.40403e-07	5.12216e-07	3.96743e-07	7.99544e-08	1.99651e-07	1.09526e-07	3.77627e-07	1.94482e-07	4.94229e-07	3.53522e-07	0	5.75632e-07	9.17712e-08	1.83763e-07	6.13358e-07	0	1.31583e-07	1.11004e-07	0	7.94093e-08	5.43427e-07
Acetobacter_cibinongensis	5.61872e-07	2.88616e-07	0	0	3.25018e-07	6.78873e-07	0	5.01142e-07	8.01487e-07	7.1185e-07	1.21088e-07	6.86241e-07	4.81358e-07	3.77593e-07	1.57272e-07	1.09293e-06	2.59718e-07	4.58795e-07	0	8.66107e-07	6.83426e-07	8.79441e-08	5.82308e-07	2.04474e-07
Acetobacter_estunensis	7.98065e-07	3.65737e-07	1.72404e-07	8.92557e-08	8.8891e-07	2.58486e-07	4.29982e-07	2.07294e-07	4.9531e-07	8.75702e-08	3.816e-07	0	2.29642e-07	3.67126e-07	9.6964e-07	2.01579e-07	7.98313e-08	5.12037e-07	1.42969e-07	2.53461e-07	1.44669e-07	6.84811e-08	0	0
Acetobacter_fabarum	1.09252e-07	0	3.93427e-07	0	1.91702e-07	0	1.16433e-06	6.34758e-07	1.14912e-07	0	5.49479e-07	0	0	2.71167e-07	0	1.02758e-07	0	0	1.10731e-07	0	0	1.04434e-07	0	9.4123e-08
Acetobacter_farinalis	0	0	0	1.98594e-07	0	3.85898e-07	0	0	0	0	1.02576e-06	0	3.04526e-07	2.51549e-07	8.87226e-08	0	1.41151e-07	0	0	0	1.69974e-07	0	2.50887e-07	2.78277e-07
Acetobacter_ghanensis	8.23065e-07	0	4.29215e-07	4.72246e-07	8.95449e-08	6.09313e-07	1.16661e-06	0	7.09597e-08	5.22249e-07	3.47309e-08	7.26643e-08	3.22769e-08	8.93663e-08	3.49914e-07	5.05849e-07	0	0	0	0	4.06674e-08	4.16445e-07	3.60466e-07	0
Acetobacter_indonesiensis	1.96409e-07	6.42372e-07	1.05392e-06	6.46915e-07	1.83463e-07	9.80008e-07	1.05936e-06	7.02083e-07	5.86923e-07	3.48734e-07	4.13923e-07	4.60346e-07	8.10551e-07	9.24424e-07	9.55629e-07	9.09691e-07	0	0	1.06552e-07	1.97374e-07	7.71734e-07	2.9022e-07	4.99111e-07	5.4318e-07
Acetobacter_lambici	9.82043e-08	3.94401e-07	3.76351e-07	7.73402e-07	8.83819e-08	0	8.77859e-07	0	3.13116e-07	7.91995e-07	1.06149e-07	8.71972e-08	9.09622e-08	1.76411e-07	0	9.11976e-08	7.41861e-07	2.53563e-07	0	2.35075e-07	5.82346e-07	5.63237e-07	0	1.20007e-07
Acetobacter_lovaniensis	5.98676e-07	4.82135e-07	1.93668e-07	3.52088e-07	3.27581e-07	0	3.44003e-07	1.37664e-07	1.43909e-07	1.15905e-06	0	0	8.08833e-07	2.77466e-07	1.31863e-07	4.01604e-07	0	0	4.65327e-07	5.03536e-07	5.90791e-07	7.80812e-08	1.12411e-07	1.76157e-07
Acetobacter_malorum	1.81217e-05	1.70301e-05	4.19648e-05	3.89821e-06	3.53583e-05	1.45507e-05	6.36462e-06	5.39882e-05	7.55829e-05	0.000129437	3.43712e-05	0.000136075	7.89616e-05	0.000260869	5.75957e-05	7.34589e-05	0.000120585	0.000171932	0.000189616	0.000273175	6.35866e-05	0.000448438	0.00028584	0.000106452
Acetobacter_musti	1.44496e-06	1.97424e-06	5.56742e-07	6.26971e-07	1.87931e-06	1.46721e-06	1.61318e-06	2.48953e-06	7.10872e-07	1.06195e-06	1.06795e-06	3.45669e-07	1.17608e-06	4.90064e-07	5.64645e-07	1.84411e-06	6.28769e-07	4.70149e-07	1.19759e-06	5.00637e-07	1.11963e-06	2.75702e-07	9.99891e-07	1.30123e-06
Acetobacter_nitrogenifigens	6.09465e-07	1.09917e-06	3.11237e-07	9.23692e-08	8.05529e-07	1.46296e-06	4.36282e-07	5.57809e-07	4.92672e-07	4.72111e-07	3.71247e-07	7.3258e-07	7.5035e-07	1.25243e-06	1.10357e-06	2.0969e-06	1.0835e-06	1.50343e-06	0	1.03807e-06	7.87107e-07	8.12786e-07	5.24497e-07	1.88591e-06
Acetobacter_oeni	5.97641e-07	1.30265e-06	1.68285e-06	8.47051e-07	1.02787e-06	1.92904e-06	1.50886e-06	2.14847e-07	1.40705e-07	9.60354e-07	1.70532e-07	8.66875e-07	6.98701e-07	3.66046e-07	6.09007e-07	1.08232e-06	4.69983e-07	5.37313e-08	1.13586e-06	0	2.47251e-07	1.16404e-06	5.33248e-07	1.24931e-06
Acetobacter_okinawensis	1.28532e-07	7.79244e-07	4.73318e-07	3.45681e-07	4.22748e-07	4.5449e-07	5.07905e-09	8.9332e-07	9.95737e-07	1.10151e-06	1.90624e-07	0	5.0225e-07	9.98799e-08	2.18015e-07	5.06654e-08	0	0	1.42268e-07	1.74012e-07	7.07072e-07	2.45726e-07	4.31197e-07	5.15531e-07
Acetobacter_orientalis	2.27018e-07	5.08721e-07	7.48593e-07	9.10799e-07	3.60286e-07	5.07139e-07	3.87466e-07	7.98879e-07	9.13136e-07	1.15416e-06	1.79443e-07	6.36345e-07	1.49261e-06	1.15406e-06	8.18797e-07	9.3536e-08	9.64299e-08	1.41269e-06	1.66096e-07	8.77325e-07	2.03188e-07	1.13888e-06	0	5.42079e-07
Acetobacter_orleanensis	1.61707e-06	1.91544e-06	2.37123e-06	1.91427e-06	2.36114e-06	1.5445e-06	1.28739e-06	3.09346e-06	1.82122e-06	1.26008e-06	1.85961e-06	2.82969e-06	1.31482e-06	9.85414e-07	1.03829e-06	1.85808e-06	1.13837e-06	2.43398e-06	4.33597e-07	1.66298e-06	2.04576e-06	1.15074e-06	2.37474e-06	2.00032e-06
Acetobacter_oryzifermentans	0	0	1.44781e-07	0	6.60719e-08	4.4959e-07	0	1.45683e-07	0	0	0	0	0	0	0	3.08274e-07	0	0	0	0	0	0	0	4.31485e-07
Acetobacter_oryzoeni	0	0	1.7169e-07	8.36185e-08	0	0	7.12109e-07	0	0	9.74219e-08	9.42075e-08	0	0	7.1493e-08	0	7.6798e-08	0	2.82089e-07	1.41182e-07	1.3076e-07	9.28929e-08	2.51894e-07	1.82224e-07	0
Acetobacter_papayae	0	0	3.72812e-07	2.37127e-07	9.21614e-07	7.05294e-07	7.15359e-08	6.88318e-08	6.09514e-07	0	5.62433e-07	2.64903e-07	6.36736e-07	0	0	4.55988e-07	0	0	0	6.24527e-07	2.20621e-07	1.11396e-07	0	2.40014e-07
Acetobacter_pasteurianus	7.6272e-07	1.76129e-06	1.05863e-06	1.27337e-06	1.10888e-06	1.86806e-06	1.04544e-06	9.90195e-07	1.80019e-06	7.47867e-07	1.69403e-06	1.13337e-06	1.69597e-06	9.42006e-07	1.85016e-06	1.58456e-06	4.65276e-07	3.1026e-06	1.08353e-06	5.18884e-07	7.10952e-07	8.22147e-07	1.67231e-06	1.22046e-06
Acetobacter_peroxydans	3.79567e-07	7.73927e-07	5.69178e-08	0	6.06442e-07	9.70211e-07	7.25592e-07	3.68376e-07	7.78205e-07	5.1795e-07	2.79196e-07	9.84259e-07	7.94132e-07	7.73878e-07	3.27948e-07	7.94722e-07	4.2968e-07	4.97805e-07	3.27378e-07	6.06425e-07	0	0	5.01775e-07	1.39138e-07
Acetobacter_persici	2.46202e-07	9.47877e-07	3.93046e-07	9.42475e-07	1.73393e-07	8.79261e-07	7.17453e-07	8.73999e-07	8.35116e-07	5.52748e-08	5.51489e-07	6.34544e-07	5.99129e-07	4.61129e-07	5.44056e-07	6.71109e-07	4.79604e-07	7.74363e-07	2.91955e-07	1.23069e-07	2.22347e-07	5.92531e-08	2.03662e-07	3.84772e-07
Acetobacter_pomorum	3.0138e-06	3.40906e-06	3.63053e-06	3.09973e-06	3.26955e-06	4.09195e-06	4.07584e-06	3.96449e-06	1.5837e-06	3.75463e-06	3.02456e-06	5.67311e-06	1.9248e-06	1.98306e-06	1.88577e-06	2.65154e-06	4.82561e-06	5.33601e-06	4.71835e-06	4.74449e-06	2.51608e-06	3.43779e-06	2.51477e-06	3.82144e-06
Acetobacter_senegalensis	1.19367e-06	3.22912e-07	4.86818e-07	9.06726e-07	1.57881e-06	1.80457e-06	2.39478e-07	1.82684e-06	2.36253e-07	7.04337e-07	1.06746e-06	7.60444e-07	6.9165e-07	2.69321e-07	9.83336e-07	8.69688e-07	2.07843e-07	3.35925e-07	2.47326e-07	5.60278e-07	5.11918e-07	1.0993e-07	1.40361e-07	5.46698e-07
Acetobacter_sicerae	0	1.09556e-07	5.73107e-07	2.03786e-07	5.83066e-07	6.18193e-07	4.58671e-07	5.51667e-08	0	0	2.0935e-07	5.86773e-07	9.84399e-07	1.29844e-07	1.05684e-07	2.08622e-07	1.3527e-07	0	1.56869e-07	2.90579e-07	1.22567e-07	0	1.01831e-07	0
Acetobacter_sp.	8.47344e-07	4.25077e-07	0	6.14585e-07	3.5848e-07	0	1.11392e-07	1.49595e-06	2.0531e-07	2.90146e-07	1.21428e-06	7.90368e-07	1.52609e-06	4.90756e-07	1.04153e-07	8.58331e-08	2.76421e-07	7.17357e-07	3.22701e-07	1.32416e-07	1.20888e-07	5.23767e-07	1.1857e-07	5.48603e-07
Acetobacter_sp._46_36	3.74579e-07	0	1.96217e-07	1.04523e-07	8.95449e-08	1.14319e-06	4.1039e-07	0	7.0913e-07	2.13889e-07	1.07666e-07	1.9144e-07	0	0	1.02665e-07	2.87993e-07	0	2.42758e-07	3.09963e-07	0	3.68254e-07	2.1986e-07	0	1.26323e-07
Acetobacter_sp._BCRC_14118	0	1.6783e-07	0	6.47754e-07	1.81936e-07	0	1.65902e-07	7.98156e-08	0	0	0	7.42104e-08	0	0	0	2.32845e-07	0	0	0	0	0	0	0	0
Acetobacter_sp._CAG:267	1.28532e-07	1.16e-07	4.03334e-07	1.10628e-07	0	0	0	0	0	3.2474e-07	0	0	2.72887e-07	0	9.33316e-08	4.29165e-07	3.84451e-07	5.93872e-10	0	0	0	4.3972e-07	0	0
Acetobacter_sp._CAG:977	6.67067e-07	3.47531e-07	6.48368e-08	4.56538e-07	0	1.02906e-07	0	8.62376e-08	3.03913e-07	0	0	3.57989e-07	9.21591e-08	2.455e-07	5.34012e-07	9.72775e-08	6.49294e-07	1.48468e-07	4.498e-07	0	7.67376e-08	8.73705e-07	7.52662e-08	0
Acetobacter_sp._DmW_043	1.49852e-07	5.96792e-07	1.20262e-07	7.68046e-07	1.35779e-07	2.48966e-07	3.10262e-07	1.46257e-07	9.62391e-08	9.74219e-08	6.0779e-08	0	8.75511e-08	2.79342e-07	0	3.04835e-07	0	0	0	8.43615e-08	0	0	6.98034e-08	1.54848e-07
Acetobacter_sp._DmW_125123	0	0	0	0	0	0	0	0	0	0	0	0	0	0	0	0	2.92183e-07	0	0	0	0	0	0	0
Acetobacter_sp._DmW_125127	0	5.97834e-07	4.69646e-07	2.80545e-07	0	3.007e-07	2.33922e-07	9.58841e-08	2.13865e-07	2.95965e-07	0	0	5.38865e-07	0	0	0	2.58553e-07	0	3.13737e-07	0	0	0	2.40434e-07	4.00023e-07
Acetobacter_sp._DsW_059	2.55962e-07	4.44221e-07	8.08442e-07	3.71206e-07	5.28085e-07	9.44679e-07	0	1.33701e-07	3.84956e-08	1.85269e-07	5.16233e-07	7.23464e-07	3.68636e-07	2.24696e-07	3.23394e-07	1.32477e-07	9.73942e-08	0	0	0	2.04364e-07	1.61126e-07	4.58822e-07	0
Acetobacter_sp._DsW_063	5.6436e-07	6.6286e-08	1.41617e-06	8.64987e-08	2.14415e-07	6.74952e-07	8.8777e-07	6.53253e-07	4.46688e-07	4.61428e-07	5.05977e-07	1.35257e-06	4.72937e-07	4.24201e-07	3.50871e-07	8.67927e-07	0	1.48468e-07	7.22411e-07	0	5.63163e-07	0	5.52751e-07	2.64235e-07
Acetobacter_sp._DsW_54	0	0	0	0	0	0	0	0	0	0	0	0	0	0	0	0	0	4.9059e-07	0	0	0	0	0	0
Acetobacter_sp._KACC_21233	8.50614e-07	2.85121e-07	1.2273e-06	3.2249e-06	1.45938e-06	1.34525e-06	1.16255e-06	1.24164e-06	1.04253e-06	5.56885e-07	5.58906e-07	6.03354e-07	1.25997e-06	5.02843e-07	7.98504e-08	1.02576e-06	2.0945e-07	1.95471e-06	2.63539e-07	1.03756e-06	9.17456e-07	5.12909e-07	4.81239e-07	4.48026e-07
Acetobacter_sp._LMG_1627	6.53895e-07	1.26731e-06	3.99496e-07	1.88304e-06	5.54759e-07	6.01256e-07	5.20635e-07	2.03572e-07	9.7133e-07	1.31196e-06	1.01433e-06	2.0517e-07	5.63324e-07	1.59762e-06	9.09511e-07	5.25622e-07	3.4648e-07	1.65935e-07	1.37738e-07	6.03948e-07	4.96508e-07	1.4847e-06	8.01446e-08	8.8894e-08
Acetobacter_sp._LMG_1636	6.38158e-07	1.5803e-06	3.22981e-07	7.73357e-07	1.14997e-06	1.83101e-07	3.83036e-06	1.71096e-06	5.16519e-07	1.075e-07	3.84575e-07	0	1.21284e-06	4.76861e-07	7.69827e-07	2.14583e-07	2.59718e-07	0	4.82786e-07	0	5.97993e-07	2.25844e-07	4.06665e-07	5.12029e-07
Acetobacter_sp._LMG_1637	0	1.98402e-07	0	1.57823e-07	9.01379e-08	2.55562e-07	0	0	0	0	0	0	0	0	0	0	0	0	0	0	0	0	0	0
Acetobacter_syzygii	2.95769e-07	0	2.18801e-07	1.9375e-07	2.94606e-08	0	9.10224e-07	3.24791e-08	8.11103e-07	1.01218e-07	4.46834e-07	3.23302e-07	1.02003e-06	1.34367e-07	4.2239e-07	7.42946e-07	9.09967e-07	3.72478e-07	2.93365e-07	4.53532e-07	3.34426e-07	5.07917e-07	6.25589e-07	8.60128e-07
Acetobacter_thailandicus	0	9.61955e-08	2.72789e-07	2.97891e-07	0	0	0	0	3.90012e-07	2.9976e-07	0	0	0	0	0	0	0	0	0	0	2.1524e-07	5.09432e-07	0	1.1708e-07
Acetobacter_tropicalis	1.76924e-06	1.5651e-06	9.45474e-07	1.31019e-06	1.78175e-06	1.84271e-06	3.05992e-07	2.77175e-06	3.89033e-07	1.54488e-06	1.58602e-06	1.12192e-06	2.09782e-06	1.62693e-06	5.64402e-07	2.63493e-06	9.95426e-07	1.88565e-06	7.98554e-07	1.18217e-06	9.41081e-07	9.53381e-07	7.23056e-07	4.91313e-07
Acetobacteraceae_bacterium	0.000124441	0.000166588	0.000132945	0.00011487	0.000127204	0.000116247	0.000143964	0.000141772	9.33943e-05	9.58925e-05	9.33091e-05	9.44321e-05	0.000130132	0.000127889	0.000113539	0.000134355	0.000110343	0.000112433	0.000108944	8.64748e-05	7.86827e-05	7.44945e-05	8.0563e-05	9.04692e-05
Acetobacteraceae_bacterium_AT-5844	1.09259e-05	8.42052e-06	1.14029e-05	1.30829e-05	8.47541e-06	9.20018e-06	8.69792e-06	6.41267e-06	1.15569e-05	8.94339e-06	1.08463e-05	7.85054e-06	1.24881e-05	7.45931e-06	9.85053e-06	1.10421e-05	1.1415e-05	9.13745e-06	7.83355e-06	9.57525e-06	1.21016e-05	1.19451e-05	1.30577e-05	1.08688e-05
Acetobacteraceae_bacterium_KEBCLARHB70R	6.30845e-06	9.68025e-06	7.01109e-06	1.04026e-05	6.86874e-06	7.77743e-06	6.74941e-06	1.12391e-05	7.377e-06	5.54643e-06	6.6303e-06	5.69334e-06	5.4585e-06	8.16265e-06	6.07851e-06	7.46905e-06	5.70426e-06	7.9157e-06	3.21622e-06	2.7344e-06	4.24335e-06	3.48989e-06	3.96158e-06	7.79704e-06
Acetobacteraceae_bacterium_SCN_69-10	1.77161e-06	5.72012e-06	3.50044e-06	3.9548e-06	4.65223e-06	4.43795e-06	4.95909e-06	4.20419e-06	2.14212e-06	3.44213e-06	1.65783e-06	1.90076e-06	3.6728e-06	3.1121e-06	1.5081e-06	2.61691e-06	1.51057e-06	1.78427e-06	6.96509e-07	1.93926e-06	6.653e-07	2.71221e-06	2.5522e-06	2.86376e-06
Acetobacterium_bakii	0	1.55398e-07	1.05017e-07	0	9.58508e-08	3.80463e-07	0	5.28357e-08	0	0	0	0	5.9073e-07	0	3.03656e-07	0	6.85874e-08	0	3.42259e-07	1.79333e-07	0	1.68782e-07	0	2.04847e-07
Acetobacterium_dehalogenans	9.29806e-08	0	1.99561e-07	1.69016e-07	7.2398e-08	9.07995e-08	0	1.76533e-07	1.09946e-06	5.97944e-07	0	5.43045e-07	2.31424e-07	3.68918e-07	4.74905e-07	3.88075e-07	4.14443e-07	1.20038e-07	0	7.78389e-07	1.46027e-06	3.55519e-07	2.27779e-07	6.12801e-07
Acetobacterium_fimetarium	6.02771e-08	0	1.02845e-07	0	3.29535e-07	2.62256e-07	4.34746e-07	0	8.55459e-08	0	0	0	9.86492e-08	9.566e-07	0	0	4.76116e-07	5.02901e-07	1.01194e-06	1.47336e-07	1.31714e-07	7.45768e-07	9.61735e-08	3.80583e-07
Acetobacterium_malicum	0	0	0	0	0	5.93689e-07	0	0	0	0	0	0	0	0	0	0	0	0	0	0	0	0	0	0
Acetobacterium_paludosum	0	0	3.8004e-07	7.04629e-08	0	0	5.95222e-08	0	0	2.37977e-07	5.75313e-08	0	0	1.82498e-07	0	1.44134e-07	0	0	0	0	0	0	0	4.62677e-07
Acetobacterium_sp.	1.10635e-07	0	5.14452e-07	0	0	2.93087e-07	9.87014e-08	0	1.94915e-07	9.86551e-08	0	0	0	0	0	0	0	0	0	0	0	0	0	0
Acetobacterium_sp._KB-1	5.41036e-08	3.70692e-07	4.0523e-08	5.4786e-08	4.79056e-07	3.59122e-07	1.85653e-07	0	5.56513e-08	0	4.39498e-08	1.86299e-07	4.3433e-08	2.05416e-07	1.91966e-07	2.37907e-07	0	0	6.13834e-08	0	0	1.08793e-07	6.67047e-08	5.80597e-07
Acetobacterium_sp._MES1	0	0	0	0	0	0	0	0	0	0	0	0	1.01509e-07	0	3.12458e-07	0	0	0	0	0	0	0	0	0
Acetobacterium_wieringae	1.15764e-07	3.13432e-07	7.76691e-08	1.57823e-07	1.35207e-07	5.11123e-08	5.16385e-08	4.96865e-08	5.61395e-07	4.43861e-07	2.93838e-07	6.79373e-07	0	0	0	5.61853e-07	3.89577e-07	1.50448e-07	0	0	0	2.22792e-07	6.33599e-07	6.35798e-08
Acetobacterium_woodii	0	0	0	0	0	0	0	0	5.02117e-07	0	0	1.51647e-07	3.09004e-07	0	3.17053e-07	1.86594e-07	0	3.3187e-07	0	0	0	0	0	0
Acetobacteroides_hydrogenigenes	9.5159e-07	4.93729e-07	3.55623e-08	1.01038e-06	3.81561e-07	1.96639e-06	7.65167e-07	1.3919e-06	5.82263e-07	7.41044e-07	5.10976e-07	2.7089e-07	8.48519e-07	9.43652e-07	1.01918e-06	8.0482e-07	1.03435e-06	1.47217e-06	5.25328e-07	0	2.44646e-06	2.13185e-07	7.9754e-07	1.51565e-06
Acetohalobium_arabaticum	2.7694e-07	5.59081e-07	4.06288e-07	2.05442e-07	3.9457e-07	8.84735e-07	1.34438e-07	2.64749e-07	5.2168e-07	6.44239e-07	2.76986e-07	4.28337e-07	1.50099e-07	2.94853e-07	9.22144e-07	8.19287e-07	1.47468e-07	9.72722e-08	0	0	1.17233e-07	1.22863e-07	4.82143e-07	3.7573e-07
Acetomicrobium_flavidum	7.16456e-07	1.28779e-06	3.8096e-07	7.13098e-07	4.01616e-07	3.29954e-07	5.14723e-07	9.80099e-07	6.22334e-07	3.55917e-07	2.12299e-07	6.55536e-07	2.91837e-07	3.96879e-07	1.53295e-07	9.71261e-07	7.05755e-08	8.1765e-08	2.87772e-07	4.48744e-07	2.47476e-07	0	3.34498e-07	5.37751e-07
Acetomicrobium_hydrogeniformans	2.18892e-06	1.41095e-06	1.16788e-06	1.01053e-06	5.56427e-07	1.02534e-06	1.92487e-06	8.18705e-07	9.87302e-07	8.79214e-07	1.32037e-06	1.75815e-06	1.24781e-06	7.71716e-07	1.2796e-06	3.41393e-07	1.6097e-06	1.54466e-06	1.00786e-06	5.80585e-07	8.23332e-07	2.04251e-07	9.21842e-07	1.63229e-06
Acetomicrobium_mobile	1.0163e-07	1.8781e-07	2.48541e-07	3.78274e-07	4.92197e-07	3.67522e-07	0	9.37834e-08	1.87895e-07	1.90205e-07	2.5122e-07	1.74394e-07	0	2.48771e-07	8.35643e-08	8.68549e-08	2.26498e-07	0	3.93996e-07	0	0	0	0	3.60021e-07
Acetomicrobium_thermoterrenum	1.02172e-06	4.1223e-07	2.07118e-07	8.33592e-07	7.30128e-07	2.14388e-07	8.11442e-07	2.72876e-07	1.32744e-07	2.48967e-07	1.29867e-06	6.00692e-07	3.52217e-07	3.30159e-07	2.89458e-07	4.68261e-07	8.56266e-07	1.21149e-06	6.7256e-07	5.18096e-07	5.16077e-07	6.40392e-07	5.47463e-07	3.02145e-07
Acetonema_longum	1.70812e-06	3.34935e-06	3.27194e-06	3.13135e-06	2.81303e-06	2.81652e-06	3.80495e-06	3.26845e-06	2.30012e-06	3.27484e-06	2.53707e-06	2.79105e-06	3.15671e-06	1.47686e-06	2.65976e-06	2.19669e-06	2.7865e-06	2.39375e-06	6.65828e-07	2.34209e-06	2.58885e-06	2.19216e-06	3.57244e-06	3.35351e-06
Acetothermia_bacterium_64_32	4.35841e-07	1.71479e-07	6.79004e-07	2.70342e-07	4.99556e-07	8.38909e-08	8.47545e-08	5.57807e-07	5.20561e-07	8.52975e-07	5.96627e-07	2.83102e-07	2.11923e-07	4.95742e-07	8.29743e-07	3.99185e-07	1.44292e-06	5.86787e-07	1.92787e-06	1.06735e-06	8.25703e-07	4.03961e-07	4.55361e-07	1.80221e-07
Acholeplasma_axanthum	0	0	0	0	0	0	0	0	0	0	0	0	0	0	0	0	0	5.93872e-07	0	0	0	2.63832e-07	0	0
Acholeplasma_laidlawii	0	0	0	0	6.54366e-08	0	9.73927e-08	0	2.2209e-07	0	0	0	0	0	0	0	0	0	0	0	0	0	0	0
Acholeplasma_oculi	0	1.06267e-07	1.64875e-07	2.67767e-07	0	0	2.38478e-07	0	0	1.7514e-07	0	0	0	0	0	0	0	0	0	0	0	0	0	0
Acholeplasma_sp.	1.82864e-07	0	1.96927e-07	0	1.91702e-07	0	1.73276e-07	0	0	1.96368e-07	1.06149e-07	4.78228e-08	4.66939e-07	2.86979e-07	0	6.02194e-07	1.08216e-07	0	0	0	0	0	3.81865e-07	2.13345e-07
Acholeplasmataceae_bacterium	7.02622e-07	1.39496e-06	1.91356e-06	1.32402e-06	1.2236e-06	1.6815e-06	1.81106e-06	1.47195e-06	1.82784e-06	1.67855e-06	2.10489e-06	1.16555e-06	2.29806e-06	9.8032e-07	2.05532e-06	2.21212e-06	2.95387e-06	4.05786e-06	3.23073e-06	1.22376e-06	1.0257e-06	1.99157e-06	2.43896e-06	2.83451e-06
Acholeplasmataceae_bacterium_Mahy22	0	0	0	0	0	0	0	0	0	0	0	0	0	0	0	0	5.41079e-07	5.8616e-07	0	1.35855e-07	1.14608e-07	0	0	0
Acholeplasmatales_bacterium	4.10096e-07	2.47787e-07	3.22543e-07	2.39338e-07	1.37689e-06	1.46942e-06	8.95285e-07	4.62604e-07	0	0	0	0	1.30736e-07	3.39123e-07	3.83282e-07	0	0	0	6.04841e-07	0	4.66941e-07	0	0	9.05712e-08
Achromatium_sp._WMS1	5.14128e-07	0	1.24525e-06	4.6728e-07	2.48023e-07	5.31836e-07	0	8.15507e-08	0	0	8.19196e-08	3.44123e-07	5.38776e-07	1.47649e-07	0	0	0	1.44661e-07	0	0	2.26278e-07	0	0	2.08708e-07
Achromatium_sp._WMS2	1.2952e-06	1.08065e-06	1.86231e-06	1.36824e-06	8.65043e-07	9.01322e-07	1.05151e-06	1.50353e-06	1.15414e-06	5.39195e-07	8.72716e-07	8.95832e-07	2.18999e-07	5.96441e-07	1.09651e-06	1.23914e-06	1.28089e-06	7.27164e-07	7.45044e-07	4.18433e-07	7.71187e-07	9.28299e-08	1.05026e-06	3.13245e-07
Achromatium_sp._WMS3	1.3406e-06	9.99462e-07	1.28974e-06	1.44212e-06	1.35122e-06	2.86866e-06	1.43496e-06	1.74625e-06	1.35771e-06	1.83972e-06	2.67901e-06	2.45509e-06	1.68506e-06	1.66653e-06	2.66718e-06	1.51272e-06	1.87215e-06	2.70399e-06	6.8636e-07	3.09505e-06	1.6393e-06	1.49212e-06	1.80401e-06	1.13937e-06
Achromobacter_aegrifaciens	3.38114e-06	3.0013e-06	3.51786e-06	2.07798e-06	2.61044e-06	4.07437e-06	4.09636e-06	2.807e-06	2.94835e-06	1.76715e-06	3.35427e-06	3.5878e-06	2.71012e-06	2.22532e-06	3.11724e-06	1.7696e-06	1.78385e-06	1.24987e-06	1.58222e-06	4.01586e-06	3.70889e-06	1.63005e-06	1.82575e-06	3.23468e-06
Achromobacter_agilis	3.04535e-06	3.14657e-06	3.38606e-06	1.57593e-06	1.65284e-06	3.13391e-06	1.39085e-06	1.58804e-06	1.16053e-06	1.70128e-06	1.96792e-06	1.62481e-06	1.41845e-06	1.28712e-06	2.32857e-06	2.0942e-06	2.40109e-06	1.18597e-06	1.4886e-06	3.08595e-06	2.41471e-06	1.69024e-06	2.37059e-06	2.97058e-06
Achromobacter_aloeverae	1.13524e-05	8.67228e-06	1.0936e-05	1.07677e-05	9.43598e-06	1.0489e-05	1.05043e-05	1.49867e-05	8.97295e-06	8.37266e-06	1.31021e-05	7.5519e-06	8.00033e-06	6.83898e-06	7.98826e-06	7.8012e-06	8.4833e-06	8.13409e-06	8.43708e-06	7.01203e-06	9.07192e-06	6.95042e-06	8.51064e-06	1.15475e-05
Achromobacter_animicus	1.83801e-06	2.50115e-06	1.54215e-06	2.28559e-06	2.10935e-06	1.34234e-06	1.79727e-06	1.32664e-06	1.95529e-06	2.83248e-06	1.38459e-06	1.94127e-06	1.21456e-06	6.585e-07	9.32069e-07	1.94847e-06	7.8633e-07	6.57926e-06	4.8533e-06	4.65906e-06	4.41323e-06	1.35981e-06	2.60324e-06	5.64846e-06
Achromobacter_anxifer	4.48984e-06	3.95716e-06	4.90751e-06	6.52128e-06	4.69068e-06	3.79796e-06	5.26984e-06	3.55065e-06	5.28561e-06	3.6832e-06	4.00921e-06	4.37843e-06	3.55736e-06	3.02523e-06	3.22381e-06	4.39552e-06	3.98769e-06	6.22653e-06	3.01218e-06	2.32231e-06	5.60711e-06	4.77574e-06	3.91455e-06	5.41892e-06
Achromobacter_arsenitoxydans	4.0103e-06	2.6611e-06	3.74484e-06	3.43815e-06	3.37985e-06	1.67228e-06	3.84381e-06	1.59604e-06	3.11867e-06	2.69816e-06	4.09842e-06	2.06502e-06	1.98007e-06	3.90997e-06	2.58276e-06	1.57108e-06	2.26483e-06	3.80202e-06	1.50954e-06	2.75142e-06	3.53228e-06	2.52767e-06	2.35687e-06	4.38386e-06
Achromobacter_deleyi	1.19052e-05	9.31381e-06	6.43449e-06	6.41435e-06	7.13761e-06	8.55702e-06	7.97936e-06	2.72369e-05	8.32169e-06	6.68949e-06	7.76796e-06	8.47817e-06	6.5917e-06	6.78888e-06	6.92409e-06	6.40855e-06	6.65748e-06	7.17214e-06	5.67024e-06	6.37065e-06	6.43715e-06	6.73857e-06	8.65458e-06	8.1522e-06
Achromobacter_denitrificans	6.59819e-06	8.31589e-06	9.47299e-06	7.48407e-06	7.02152e-06	4.7452e-06	4.32632e-06	9.06944e-06	8.68036e-06	3.92044e-06	6.35103e-06	6.19815e-06	5.1997e-06	5.94524e-06	6.74304e-06	5.44906e-06	8.30116e-06	8.65879e-06	5.42105e-06	6.54527e-06	5.97395e-06	5.45407e-06	6.21679e-06	8.89986e-06
Achromobacter_dolens	2.05058e-06	1.68051e-06	1.69991e-06	2.32931e-06	1.89033e-06	2.15425e-06	2.54426e-06	3.05593e-06	4.72694e-06	1.10082e-06	2.60357e-06	1.65712e-06	2.85123e-06	2.99018e-06	1.16673e-06	3.25844e-06	1.2455e-06	1.4712e-06	4.3529e-07	1.40372e-06	2.72314e-06	2.304e-06	1.53819e-06	4.29796e-06
Achromobacter_insolitus	7.30999e-06	7.50925e-06	9.42444e-06	5.21119e-06	5.96081e-06	7.37589e-06	6.76135e-06	6.24368e-06	8.27881e-06	4.91492e-06	6.99036e-06	5.71009e-06	5.35507e-06	4.13779e-06	7.37164e-06	4.85404e-06	9.20965e-06	6.32945e-06	8.16257e-06	8.36443e-06	8.48115e-06	6.41724e-06	4.5212e-06	1.00766e-05
Achromobacter_insuavis	3.286e-06	4.32492e-06	2.42231e-06	3.48077e-06	2.7107e-06	3.09905e-06	3.43296e-06	1.98607e-05	3.91106e-06	3.47354e-06	3.99808e-06	3.49602e-06	3.22243e-06	3.19138e-06	2.56792e-06	2.19179e-06	2.41518e-06	3.74915e-06	2.05686e-06	2.50527e-06	1.92111e-06	2.5838e-06	4.9999e-06	2.37975e-06
Achromobacter_kerstersii	3.67054e-06	1.61788e-06	2.87746e-06	2.53292e-06	2.75217e-06	1.7985e-06	2.71551e-06	1.51867e-06	5.56139e-06	2.73108e-06	1.72097e-06	2.18173e-06	1.37366e-06	2.66272e-06	1.23464e-06	2.86923e-06	2.62699e-06	1.36638e-06	1.67493e-06	2.63261e-06	3.14793e-06	2.01387e-06	1.29067e-06	2.46957e-06
Achromobacter_marplatensis	2.14295e-06	2.31903e-06	2.52284e-06	1.46861e-06	3.07603e-06	2.95801e-06	2.12104e-06	3.71247e-06	1.32484e-06	1.53181e-06	1.8681e-06	2.70648e-06	1.95858e-06	1.43899e-06	2.81114e-06	1.46136e-06	6.87011e-07	1.77462e-06	1.69901e-06	1.57099e-06	1.62122e-06	1.57027e-06	1.22814e-06	1.14498e-06
Achromobacter_mucicolens	5.4966e-06	6.25573e-06	1.15336e-05	5.30205e-06	4.94132e-06	4.87791e-06	6.6213e-06	5.81355e-06	7.57479e-06	6.7161e-06	7.09655e-06	6.48776e-06	5.48352e-06	3.56808e-06	4.33833e-06	4.44169e-06	4.18311e-06	1.05801e-05	2.82223e-06	9.49222e-06	7.26157e-06	4.45592e-06	5.10556e-06	7.35546e-06
Achromobacter_pestifer	2.49972e-06	3.41193e-06	5.60072e-06	3.90127e-06	3.74012e-06	4.32117e-06	4.29361e-06	3.88736e-06	3.84602e-06	2.83993e-06	3.91099e-06	4.20667e-06	3.49521e-06	2.48619e-06	2.74653e-06	2.60537e-06	5.95027e-06	1.57754e-06	2.58592e-06	4.00532e-06	2.66478e-06	2.85192e-06	3.10388e-06	2.28586e-06
Achromobacter_phage_JWF	0	0	0	0	0	0	7.53146e-07	0	0	0	0	0	0	0	0	0	0	0	0	0	0	0	0	0
Achromobacter_phage_Motura	8.16839e-08	4.42319e-07	0	0	0	0	0	0	0	0	0	0	0	0	0	0	0	0	0	0	3.52993e-07	0	0	0
Achromobacter_phage_phiAxp-2	0	0	0	0	0	0	0	0	0	0	0	0	8.05068e-08	0	0	3.3544e-07	0	0	0	0	0	0	0	0
Achromobacter_phage_vB_Ade_ART	0	0	0	0	0	0	6.17025e-06	0	0	0	0	0	0	0	1.4259e-08	0	0	0	0	0	0	0	0	0
Achromobacter_phage_vB_AxyP_19-32_Axy04	0	0	0	0	6.60719e-08	0	0	2.91366e-07	0	0	0	0	0	0	0	0	0	0	0	0	0	0	0	0
Achromobacter_phage_vB_AxyP_19-32_Axy10	0	0	0	0	7.61656e-08	1.59133e-07	0	8.7675e-07	7.93725e-08	0	0	0	2.40704e-07	0	0	6.07566e-07	0	0	0	0	0	0	0	0
Achromobacter_phage_vB_AxyP_19-32_Axy12	0	0	0	0	0	0	0	0	0	0	0	0	0	1.38609e-07	2.19996e-07	5.95576e-07	0	0	0	1.3076e-07	0	3.13301e-07	0	0
Achromobacter_phage_vB_AxyP_19-32_Axy13	0	0	0	0	1.67197e-07	0	0	1.63101e-07	0	0	0	0	1.52263e-07	6.80903e-07	9.84457e-08	3.96511e-07	0	0	0	0	0	0	0	0
Achromobacter_phage_vB_AxyP_19-32_Axy22	0	0	0	0	2.02542e-07	0	4.64132e-08	4.26044e-07	0	0	0	0	1.02685e-07	2.02138e-07	1.28331e-07	1.30282e-07	0	0	0	0	0	0	0	0
Achromobacter_phage_vB_AxyP_19-32_Axy24	0	0	0	0	1.2262e-07	6.95312e-08	0	3.62088e-07	0	0	1.35795e-07	0	0	0	0	0	0	0	0	0	0	0	0	0
Achromobacter_piechaudii	3.88938e-06	5.84477e-06	3.43076e-06	4.04666e-06	3.87753e-06	4.11495e-06	2.69683e-06	4.64115e-06	5.41311e-06	3.86081e-06	4.76622e-06	4.4771e-06	4.26996e-06	2.67668e-06	4.24463e-06	3.69548e-06	3.73563e-06	4.21732e-06	5.02154e-06	3.29357e-06	4.37064e-06	3.23414e-06	4.10605e-06	6.31729e-06
Achromobacter_pulmonis	5.06718e-06	3.85817e-06	4.46658e-06	6.53474e-06	6.00711e-06	4.80158e-06	4.79334e-06	6.55965e-06	7.01872e-06	5.18184e-06	2.97954e-06	3.35763e-06	3.0028e-06	4.57716e-06	3.25265e-06	3.81651e-06	3.08907e-06	2.59121e-06	4.47092e-06	2.88923e-06	3.44147e-06	1.05894e-06	2.49795e-06	3.54208e-06
Achromobacter_ruhlandii	5.7392e-06	4.4286e-06	3.40801e-06	5.34801e-06	3.66935e-06	3.55344e-06	3.51575e-06	6.52915e-06	4.60513e-06	6.27533e-06	4.20503e-06	3.98047e-06	4.90969e-06	4.46466e-06	3.44582e-06	6.27885e-06	3.96647e-06	4.7908e-06	1.38312e-06	4.20774e-06	5.34074e-06	4.48132e-06	3.55612e-06	4.29908e-06
Achromobacter_sp.	9.0379e-06	5.90232e-06	6.44742e-06	4.09819e-06	5.08989e-06	6.32122e-06	4.88411e-06	8.12316e-06	6.7314e-06	2.82724e-06	6.4764e-06	5.073e-06	4.19681e-06	2.86311e-06	5.23443e-06	4.27332e-06	6.32586e-06	4.23316e-06	4.89251e-06	4.70009e-06	5.93108e-06	4.68252e-06	4.68467e-06	5.21006e-06
Achromobacter_sp._2789STDY5608615	1.29388e-06	5.00279e-07	1.85311e-06	1.52354e-06	3.65709e-07	1.39367e-06	2.75894e-06	1.73155e-06	9.27004e-07	3.93569e-07	1.46885e-06	3.51763e-07	1.53181e-07	9.63747e-07	8.21312e-07	5.45765e-07	2.07583e-07	1.21329e-07	0	0	1.89832e-07	9.71475e-08	4.40827e-07	1.82778e-07
Achromobacter_sp._2789STDY5608621	6.54047e-07	1.46863e-06	6.47373e-07	9.26049e-07	2.30108e-07	5.56345e-07	1.00322e-06	8.0726e-07	1.05468e-07	1.18119e-06	7.69049e-07	7.54486e-07	4.41879e-07	8.63036e-07	6.42529e-07	5.50022e-07	3.85163e-07	0	5.44992e-07	1.12482e-07	2.32232e-07	6.14315e-08	9.30711e-08	7.05923e-08
Achromobacter_sp._2789STDY5608628	1.57481e-07	4.92416e-07	3.30188e-07	3.82967e-07	2.70346e-07	4.28775e-07	2.29336e-07	4.95964e-07	2.35066e-07	2.40875e-07	1.12939e-06	7.75199e-07	3.07236e-07	3.2014e-07	7.18181e-07	2.31987e-06	2.31218e-06	1.63926e-07	1.39439e-07	2.25143e-07	4.67914e-07	8.58802e-08	6.86954e-08	3.85207e-07
Achromobacter_sp._2789STDY5608633	0	0	0	0	0	0	0	0	0	3.89688e-07	0	2.98962e-07	9.21591e-08	0	0	0	0	0	4.91067e-07	8.25855e-07	0	0	1.23652e-07	7.57938e-07
Achromobacter_sp._AONIH1	5.04227e-06	6.74955e-06	6.92175e-06	8.27315e-06	4.65812e-06	6.2898e-06	4.5941e-06	6.25028e-06	7.53291e-06	5.14565e-06	7.44257e-06	5.65631e-06	3.68842e-06	4.1002e-06	3.62396e-06	4.9816e-06	6.10777e-06	5.4865e-06	4.77444e-06	5.71559e-06	5.37976e-06	4.45415e-06	6.13983e-06	7.32314e-06
Achromobacter_sp._B4U2B	8.58169e-07	5.09933e-07	2.44521e-06	6.00002e-07	4.72903e-07	1.16796e-06	1.55164e-06	8.42047e-07	1.6664e-06	1.70898e-06	7.02474e-07	1.03519e-06	7.41911e-07	2.80899e-07	3.96295e-07	2.38388e-06	1.22086e-06	1.3892e-06	6.34826e-07	2.75285e-07	7.53872e-07	2.17981e-07	1.14189e-06	1.23465e-06
Achromobacter_sp._B7	1.50645e-06	2.59124e-07	4.25895e-07	1.06381e-06	7.13652e-07	2.05812e-07	4.96757e-07	1.04076e-06	5.1815e-07	7.9067e-07	5.96386e-07	4.84484e-07	9.55074e-07	3.3855e-07	2.34343e-07	1.86801e-07	6.95673e-07	1.50448e-07	1.25495e-06	0	3.78207e-07	1.20582e-06	9.40828e-08	0
Achromobacter_sp._Bel	2.18841e-06	3.46357e-06	1.21323e-06	1.669e-06	7.04716e-07	2.55282e-06	2.56685e-06	1.83343e-06	2.20621e-06	7.4638e-07	1.78837e-06	2.66737e-06	2.05631e-06	1.26314e-06	1.23739e-06	1.31759e-06	1.83546e-06	8.88888e-07	4.20059e-07	1.98062e-06	2.00998e-06	1.17505e-06	1.42297e-06	1.95915e-06
Achromobacter_sp._DH1f	4.07684e-06	1.38752e-06	2.96652e-06	1.81602e-06	2.30555e-06	3.13871e-06	3.34395e-06	3.54315e-06	3.17427e-06	2.19541e-06	1.00235e-06	1.06323e-06	2.75824e-06	9.13313e-07	1.95247e-06	1.15249e-06	8.85752e-07	7.90003e-07	6.49233e-07	7.78027e-07	1.748e-06	1.01062e-06	2.3889e-06	8.41277e-07
Achromobacter_sp._DMS1	5.61601e-06	4.98329e-06	4.89071e-06	4.07499e-06	5.75163e-06	4.79984e-06	4.29997e-06	4.6773e-06	4.19224e-06	3.40869e-06	3.7468e-06	4.14782e-06	2.21778e-06	3.00248e-06	5.24626e-06	2.3606e-06	4.79519e-06	4.02648e-06	4.79219e-06	5.56286e-06	2.84269e-06	2.88099e-06	5.04361e-06	5.4807e-06
Achromobacter_sp._HZ01	3.9064e-06	3.86832e-06	4.29009e-06	2.68822e-06	2.14491e-06	2.47618e-06	1.80644e-06	2.57143e-06	5.44229e-06	4.05988e-06	3.69052e-06	3.32299e-06	2.79858e-06	2.25592e-06	3.2836e-06	2.66395e-06	2.41607e-06	1.18437e-06	1.01047e-06	4.0077e-06	2.65515e-06	2.14782e-06	4.17913e-06	4.82265e-06
Achromobacter_sp._HZ28	6.81232e-06	5.78809e-06	7.56315e-06	6.80942e-06	5.65837e-06	5.45323e-06	6.14445e-06	5.75171e-06	7.04159e-06	4.66584e-06	4.41444e-06	5.76369e-06	6.99285e-06	5.11427e-06	5.27688e-06	3.6665e-06	6.2664e-06	6.47575e-06	3.56693e-06	6.53521e-06	6.1602e-06	6.36853e-06	7.4449e-06	7.69359e-06
Achromobacter_sp._HZ34	5.83622e-06	3.50382e-06	3.48162e-06	4.57294e-06	2.48096e-06	3.56073e-06	5.27951e-06	3.58211e-06	3.80001e-06	2.82539e-06	3.11313e-06	2.69693e-06	3.93931e-06	3.53261e-06	3.70804e-06	3.35458e-06	1.72031e-06	3.04928e-06	1.70261e-06	3.88858e-06	2.82304e-06	2.63429e-06	2.71185e-06	4.16493e-06
Achromobacter_sp._K91	9.10435e-08	5.93754e-07	7.70938e-07	3.36328e-07	3.80371e-07	0	6.76016e-07	8.82667e-08	5.76742e-07	1.76139e-07	7.09322e-07	1.00856e-06	4.18578e-07	3.31453e-07	2.07961e-07	7.74782e-07	6.0536e-07	7.81749e-08	0	5.44748e-07	0	4.75795e-07	0	5.46334e-07
Achromobacter_sp._KAs_3-5	9.20019e-08	0	1.56973e-07	0	5.44234e-07	8.12417e-08	1.64156e-07	3.15902e-07	4.24163e-07	3.98002e-07	0	0	0	0	7.56477e-08	0	4.10081e-07	1.23556e-06	0	4.40456e-07	4.3092e-07	4.3972e-07	9.11118e-08	1.01058e-07
Achromobacter_sp._KS-M25	5.04771e-06	8.39287e-06	6.83122e-06	7.56323e-06	6.6221e-06	7.68429e-06	9.92185e-06	5.25157e-06	7.90226e-06	3.9419e-06	5.54016e-06	5.58581e-06	6.12904e-06	5.91026e-06	4.66075e-06	2.90041e-06	4.24705e-06	4.78361e-06	6.27018e-06	6.05062e-06	6.97436e-06	4.6447e-06	4.5817e-06	6.93588e-06
Achromobacter_sp._LC458	1.36268e-06	2.05719e-06	1.08786e-06	1.57685e-06	9.9585e-07	6.31669e-07	2.67153e-07	1.46992e-06	2.02006e-06	1.28561e-06	7.2994e-07	7.29892e-07	8.94671e-07	5.8763e-07	8.21133e-07	7.80585e-07	4.87205e-07	7.05532e-07	0	1.65094e-07	4.95875e-07	1.35607e-06	4.79946e-07	1.18525e-07
Achromobacter_sp._MFA1_R4	2.53794e-06	1.22769e-06	3.3418e-06	1.48515e-06	2.51653e-06	2.73145e-06	2.10984e-06	2.41641e-06	1.92241e-06	2.07106e-06	1.43288e-06	2.31319e-06	1.96034e-06	2.16646e-06	1.96003e-06	2.31107e-06	2.84788e-06	2.75835e-06	5.59293e-06	8.9229e-06	4.27488e-06	2.12605e-06	3.52211e-06	7.46717e-06
Achromobacter_sp._MYb9	4.01264e-07	1.71841e-06	7.88176e-07	8.95904e-07	7.36847e-07	1.01048e-06	6.81599e-07	2.00281e-06	1.66137e-06	1.30267e-06	1.51248e-06	2.09961e-06	1.63363e-06	3.05369e-07	6.37803e-07	9.58259e-07	1.00001e-06	8.14603e-07	2.46541e-06	2.01071e-06	2.15317e-06	1.82572e-06	1.53465e-06	1.18234e-06
Achromobacter_sp._NFACC18-2	1.24781e-06	2.2301e-06	2.01717e-06	2.65073e-06	1.68425e-06	7.04828e-07	1.56319e-06	1.40934e-06	1.90145e-06	1.18688e-06	1.82448e-06	1.4975e-06	2.06441e-06	2.03579e-06	2.60132e-06	1.27206e-06	1.73066e-06	9.94999e-07	1.25224e-06	3.22118e-06	1.8718e-06	1.73302e-06	1.40493e-06	5.92141e-06
Achromobacter_sp._RTa	5.11335e-06	6.49261e-06	3.59244e-06	3.06396e-06	4.4182e-06	3.05809e-06	3.15191e-06	2.47508e-06	4.3088e-06	2.43081e-06	3.667e-06	2.69616e-06	4.0293e-06	1.94776e-06	2.58253e-06	3.54766e-06	2.73223e-06	2.76855e-06	6.28666e-06	3.37938e-06	3.21582e-06	2.04106e-06	2.74277e-06	2.43783e-06
Achromobacter_sp._RW408	1.3045e-07	5.88659e-07	7.7901e-07	0	6.61175e-07	7.87547e-08	1.62501e-06	1.88538e-07	0	1.05321e-07	0	1.96501e-07	0	1.01371e-07	0	2.11651e-07	9.84793e-07	1.68412e-07	5.05726e-07	1.56132e-07	2.21763e-07	1.24697e-07	0	3.89211e-07
Achromobacter_sp._Root170	6.96949e-07	2.4147e-07	4.44968e-07	6.08416e-07	1.51436e-07	0	0	4.39518e-07	7.3576e-07	7.94769e-07	3.42554e-07	7.09347e-07	4.46432e-07	5.98871e-07	7.7243e-07	1.89858e-07	6.72276e-07	5.42648e-07	1.08601e-07	7.20635e-07	8.8042e-07	2.73134e-07	2.41733e-06	2.14951e-06
Achromobacter_sp._Root565	3.17928e-07	5.64985e-07	2.69985e-07	1.64496e-07	7.60128e-07	5.49664e-07	9.70493e-07	1.17794e-06	1.67227e-06	1.02372e-06	7.17243e-07	1.18311e-06	3.93302e-07	2.24521e-07	1.84266e-06	4.55732e-07	1.63767e-06	2.3048e-06	1.16392e-06	2.05302e-06	1.04034e-06	8.06253e-07	1.87713e-07	7.07636e-07
Achromobacter_sp._Root83	3.53122e-06	3.53759e-06	5.33583e-06	3.07264e-06	3.89602e-06	3.67571e-06	2.93453e-06	5.63631e-06	3.62084e-06	3.51824e-06	3.65778e-06	3.25206e-06	3.1032e-06	3.35119e-06	2.96841e-06	3.16278e-06	1.71301e-06	3.2678e-06	1.46476e-06	3.78672e-06	3.34693e-06	3.32677e-06	3.73297e-06	3.81499e-06
Achromobacter_sp._SLBN-14	8.5688e-08	7.00518e-07	9.08818e-07	4.52794e-07	1.51787e-07	3.53609e-07	6.23793e-08	1.63091e-06	9.22513e-07	1.11736e-06	1.37069e-06	3.13688e-07	3.19116e-07	3.96325e-07	6.47488e-07	6.29678e-07	1.07508e-06	1.6946e-06	1.8246e-06	3.83773e-07	1.78189e-06	1.37785e-06	3.10413e-07	1.26436e-06
Achromobacter_sp._UMC46	3.35824e-06	7.94025e-07	2.72373e-06	1.79086e-06	2.63261e-06	1.12821e-06	1.96871e-06	8.48172e-07	3.54614e-06	1.4795e-06	3.41912e-06	1.61911e-06	2.44931e-06	1.17241e-06	1.0928e-06	1.27734e-06	8.39754e-07	2.44033e-07	1.56515e-06	2.03782e-07	1.1968e-06	1.13002e-06	9.34367e-07	8.56989e-07
Achromobacter_sp._UMC71	9.61926e-07	2.48332e-06	1.87436e-06	1.35593e-06	1.45862e-06	2.72256e-06	1.67179e-06	1.57417e-06	2.7288e-06	1.57824e-06	1.83845e-06	2.10584e-06	2.47936e-06	2.53608e-06	1.72398e-06	2.41327e-06	3.01899e-06	1.35825e-06	9.84892e-07	1.50356e-06	2.75594e-06	2.66967e-06	1.7893e-06	1.88348e-06
Achromobacter_spanius	8.82261e-06	6.94051e-06	1.01228e-05	9.17243e-06	9.79666e-06	8.3954e-06	9.71196e-06	9.65427e-06	7.53668e-06	6.52696e-06	7.85387e-06	6.24605e-06	5.95387e-06	5.23269e-06	5.23888e-06	4.49083e-06	4.75036e-06	6.46894e-06	1.95516e-06	3.61709e-06	9.27943e-06	6.81616e-06	8.17349e-06	1.04688e-05
Achromobacter_veterisilvae	3.06997e-06	1.95983e-06	4.50827e-06	2.21655e-06	2.45216e-06	3.28522e-06	2.78305e-06	3.62559e-06	4.20613e-06	2.31545e-06	1.79787e-06	3.19795e-06	2.41907e-06	2.44689e-06	3.49023e-06	1.51378e-06	3.65381e-06	3.45547e-06	4.71891e-06	4.05485e-06	4.67172e-06	3.47623e-06	3.84813e-06	3.0411e-06
Achromobacter_virus_Axp3	0	0	0	0	5.81659e-08	0	0	0	0	0	0	0	4.78912e-07	0	2.45693e-07	1.24715e-07	0	0	0	0	0	0	0	0
Achromobacter_xylosoxidans	3.17352e-05	3.3763e-05	3.00188e-05	2.54431e-05	2.93532e-05	2.46101e-05	2.99462e-05	3.65998e-05	3.68137e-05	2.35335e-05	2.64276e-05	2.70168e-05	2.5196e-05	2.01103e-05	2.75476e-05	2.24138e-05	2.50881e-05	3.58928e-05	3.2807e-05	2.6004e-05	2.52857e-05	2.32543e-05	2.55069e-05	3.80813e-05
Acidaminobacter_hydrogenoformans	9.20019e-08	2.27425e-07	6.11167e-08	7.06645e-07	4.73804e-07	6.18561e-07	7.91246e-08	2.51433e-07	1.4665e-07	6.18886e-07	4.19023e-07	5.31488e-07	3.50655e-07	0	4.33473e-07	5.91552e-07	1.21233e-06	1.12234e-06	1.12738e-06	0	3.67841e-07	3.71319e-07	3.81865e-07	1.06673e-07
Acidaminobacter_sp.	1.23436e-06	1.76817e-06	4.93253e-07	7.01251e-07	8.64289e-07	8.79407e-07	1.0995e-06	1.6831e-06	7.09102e-07	1.42043e-06	6.49619e-07	1.50573e-06	1.03978e-06	1.00024e-06	1.79663e-06	6.56776e-07	7.29173e-07	1.97682e-06	2.16168e-07	4.81228e-07	5.11916e-07	6.89753e-07	3.15254e-07	5.03355e-07
Acidaminococcaceae_bacterium	7.07925e-07	4.18477e-07	6.27121e-07	7.41565e-07	9.49254e-07	7.82886e-07	9.31166e-07	4.57124e-07	9.83471e-07	3.9764e-08	4.91108e-07	5.12251e-07	4.75162e-07	9.82824e-07	1.52272e-07	4.1365e-07	3.6476e-07	4.20594e-07	3.16939e-07	4.59624e-07	6.97882e-07	8.90346e-07	8.87482e-07	1.39869e-06
Acidaminococcus_fermentans	2.82e-07	6.38582e-07	6.26574e-08	2.14696e-07	9.58508e-08	7.94317e-07	2.10741e-07	6.75916e-08	8.64317e-07	2.97164e-07	0	1.75381e-07	9.52428e-07	7.9266e-07	5.71129e-07	1.6967e-07	5.66245e-07	1.00354e-06	0	1.21638e-07	4.10457e-07	1.94295e-07	0	7.8144e-07
Acidaminococcus_intestini	0	0	0	0	0	0	0	0	0	0	0	0	0	0	0	2.23341e-07	0	0	0	0	6.30345e-07	0	0	0
Acidaminococcus_intestini_CAG:325	1.18111e-07	6.3957e-07	5.89865e-07	5.70286e-07	0	3.1289e-07	0	2.02775e-07	0	0	0	2.39596e-07	0	7.07483e-08	0	0	0	0	0	0	0	0	0	0
Acidaminococcus_massiliensis	0	0	0	0	0	0	0	0	0	0	1.86089e-07	8.61207e-08	2.59411e-07	0	0	0	3.65228e-07	0	0	0	0	1.04434e-07	0	0
Acidaminococcus_sp._AM05-11	0	0	1.96217e-07	4.84375e-07	8.95449e-08	0	0	2.96158e-07	0	0	0	0	0	0	2.99439e-07	0	0	0	6.79441e-07	0	0	0	0	0
Acidaminococcus_sp._AM33-14BH	0	1.14319e-07	0	0	0	0	0	0	4.46326e-07	4.51812e-07	1.09226e-07	0	0	0	0	0	0	0	0	0	0	0	1.25444e-07	0
Acidaminococcus_sp._BV3L6	8.48561e-08	0	0	0	0	0	0	0	0	0	1.75683e-07	0	6.80009e-08	0	0	7.08331e-08	0	0	0	0	0	0	0	0
Acidaminococcus_timonensis	0	2.78401e-07	0	0	1.68729e-07	4.69527e-07	0	8.53437e-07	1.22009e-06	4.68219e-07	0	3.89002e-08	2.319e-07	8.82057e-08	0	1.33556e-07	8.0491e-08	0	0	2.7171e-07	0	3.25507e-07	8.14646e-08	2.3803e-07
Acidianus_sulfidivorans	4.07166e-07	4.78062e-08	1.47163e-07	1.96693e-07	9.96889e-08	1.01552e-07	0	1.48079e-07	2.79968e-07	4.75586e-07	6.18121e-07	2.33138e-07	2.12759e-07	1.01967e-07	2.6989e-07	3.8399e-07	3.15327e-07	2.55381e-07	2.73001e-07	0	1.16116e-07	1.47636e-07	0	0
Acidibacillus_ferrooxidans	2.13093e-06	2.0299e-06	3.84318e-06	2.21618e-06	3.33066e-06	2.7236e-06	1.94792e-06	3.05765e-06	1.39321e-06	1.65835e-06	3.19291e-06	1.99078e-06	2.97764e-06	1.3899e-06	1.61762e-06	3.15373e-06	1.75357e-06	1.49985e-06	1.3184e-06	2.48293e-06	2.87662e-06	2.88996e-06	2.42707e-06	1.72647e-06
Acidibacillus_sulfuroxidans	1.41718e-06	1.3502e-06	5.07772e-07	6.56565e-07	9.10713e-07	1.18403e-06	8.87377e-07	1.11616e-06	3.99973e-07	1.53031e-06	3.79872e-07	1.09671e-06	8.31619e-07	7.73358e-07	1.28895e-06	8.80405e-07	1.99235e-06	2.8566e-07	1.10065e-06	4.79501e-07	0	1.05756e-07	1.77524e-06	6.95895e-07
Acidibrevibacterium_fodinaquatile	9.4764e-06	1.51902e-05	1.1149e-05	1.4071e-05	1.12911e-05	1.67198e-05	1.20527e-05	1.43777e-05	7.06589e-06	9.43884e-06	1.10846e-05	9.27977e-06	1.28398e-05	8.55903e-06	1.22177e-05	1.24882e-05	6.64905e-06	5.71958e-06	1.04658e-05	8.40354e-06	7.56433e-06	5.31476e-06	7.68398e-06	7.17679e-06
Acidicaldus_sp.	8.5308e-06	1.16893e-05	8.01348e-06	8.47072e-06	1.04136e-05	8.24931e-06	9.123e-06	1.20137e-05	5.6534e-06	4.85432e-06	8.3782e-06	7.82577e-06	7.17924e-06	9.74673e-06	9.54135e-06	1.1711e-05	8.34013e-06	4.43859e-06	6.046e-06	7.02393e-06	6.06565e-06	5.09305e-06	4.03217e-06	5.80282e-06
Acidicaldus_sp._USBA-GBX-499	0	0	0	0	0	1.10257e-07	0	0	0	0	0	0	4.00234e-07	0	0	1.04226e-07	0	0	0	0	0	0	0	0
Acidiferrimicrobium_australe	8.37185e-05	8.05677e-05	7.26369e-05	8.0897e-05	0.000118361	0.00012359	0.000118099	0.000117336	9.5415e-05	9.33089e-05	9.44702e-05	9.71654e-05	9.49221e-05	9.5406e-05	0.000100699	9.37531e-05	0.00016705	0.00014651	0.000182283	0.000138682	8.09967e-05	6.94988e-05	7.12881e-05	8.39962e-05
Acidiferrobacter_sp.	6.06957e-07	0	0	2.94213e-07	6.21729e-07	0	0	2.77877e-07	1.06932e-07	4.69503e-07	9.30444e-08	3.66013e-07	3.55858e-07	2.82993e-07	7.98504e-08	3.03992e-07	2.16431e-07	7.52238e-07	1.25495e-07	1.18067e-06	0	3.34188e-07	4.57194e-07	1.06673e-07
Acidiferrobacter_sp._SPIII_3	2.44059e-06	2.83194e-06	2.84151e-06	1.82073e-06	3.73394e-06	3.15318e-06	5.71357e-06	1.07776e-05	2.81991e-06	1.46127e-06	1.90575e-06	1.80818e-06	3.87797e-06	2.68432e-06	2.19985e-06	1.34255e-06	6.17535e-07	3.39477e-06	1.42089e-06	9.25796e-07	8.63053e-07	1.1989e-06	2.31548e-06	1.73624e-06
Acidiferrobacter_thiooxydans	4.20845e-06	4.75371e-06	4.53733e-06	4.88326e-06	4.7179e-06	5.17048e-06	4.64105e-06	3.69821e-06	2.89687e-06	4.44588e-06	3.09149e-06	3.78025e-06	4.67637e-06	4.10446e-06	3.48807e-06	4.68151e-06	2.10359e-06	3.16282e-06	2.52534e-06	3.41832e-06	3.77591e-06	4.61442e-06	3.40769e-06	3.40219e-06
Acidiferrobacteraceae_bacterium	1.8186e-05	1.53969e-05	1.55216e-05	1.30485e-05	1.45524e-05	9.80392e-06	1.2137e-05	1.63105e-05	2.10937e-05	1.89587e-05	1.8867e-05	1.50038e-05	1.86295e-05	1.62697e-05	1.58136e-05	1.73925e-05	1.94695e-05	1.84781e-05	1.6377e-05	1.85135e-05	1.86821e-05	1.15812e-05	1.39397e-05	1.99369e-05
Acidihalobacter_ferrooxidans	3.63209e-06	4.24818e-06	3.94518e-06	4.08531e-06	4.01984e-06	3.6703e-06	4.13507e-06	5.11479e-06	4.90766e-06	3.52955e-06	4.94848e-06	2.7851e-06	3.87539e-06	3.27889e-06	3.30522e-06	5.37856e-06	4.75991e-06	7.38575e-06	3.14237e-06	2.43841e-06	2.37812e-06	3.97041e-06	2.98219e-06	3.66283e-06
Acidihalobacter_prosperus	1.6695e-05	1.54621e-05	1.56069e-05	1.61844e-05	1.64283e-05	1.57037e-05	1.45359e-05	1.87089e-05	1.47138e-05	1.23347e-05	1.80573e-05	1.47878e-05	1.49695e-05	1.6558e-05	1.42897e-05	1.5435e-05	9.75074e-06	1.08382e-05	6.97325e-06	1.06082e-05	8.59187e-06	7.65886e-06	1.10753e-05	1.01018e-05
Acidilobales_archaeon	9.47653e-07	1.16908e-06	1.60143e-06	8.156e-07	5.3336e-07	9.89482e-08	4.42705e-07	4.63423e-07	1.3009e-06	8.05106e-07	8.58897e-07	8.8256e-08	3.67755e-07	5.0803e-07	1.0914e-06	5.72832e-07	7.44211e-07	9.488e-07	6.90021e-07	9.77646e-07	9.81877e-07	8.02853e-07	1.41228e-06	2.1906e-07
Acidilobus_saccharovorans	0	2.76773e-07	0	0	0	1.35403e-07	2.05195e-07	0	0	0	0	0	0	0	0	0	0	0	0	0	0	0	0	0
Acidilobus_sp.	1.19728e-07	0	0	0	0	0	0	0	0	0	0	9.55586e-08	0	0	2.95337e-07	0	3.0339e-07	4.63708e-07	4.64159e-07	0	1.20888e-07	2.28896e-07	0	0
Acidilobus_sp._7A	2.15807e-07	1.95983e-07	0	3.97188e-07	0	0	9.74676e-08	9.37834e-08	2.88717e-07	5.43818e-07	2.24973e-07	8.71972e-08	8.75511e-08	0	0	0	0	4.1791e-07	0	0	0	0	1.08195e-07	0
Acidimangrovimonas_indica	5.60651e-07	1.39756e-06	8.60258e-07	1.72717e-06	1.00178e-06	5.33305e-07	8.48351e-07	2.21828e-06	2.17983e-06	9.27448e-07	1.64014e-06	1.99177e-06	1.06829e-06	1.66028e-06	7.77983e-07	1.44865e-06	5.61013e-07	1.79655e-06	1.02486e-06	1.98695e-06	9.37861e-07	2.73517e-07	1.38405e-06	1.56511e-06
Acidimangrovimonas_sediminis	1.76982e-06	1.99827e-06	2.23183e-06	1.52534e-06	1.94301e-06	1.99911e-06	3.04169e-06	2.85979e-06	1.22853e-06	3.85353e-06	1.08714e-06	2.47209e-06	1.77855e-06	2.20194e-06	1.14187e-06	2.12545e-06	1.24003e-06	3.42981e-06	2.31939e-06	2.32472e-06	9.3883e-07	1.68744e-06	1.60979e-06	1.28796e-06
Acidimicrobiaceae_bacterium	0.000505268	0.000470593	0.000509572	0.000590646	0.000684095	0.000683821	0.000686593	0.000631633	0.000661468	0.000690804	0.000645467	0.000646988	0.000579914	0.000551031	0.000623499	0.000555901	0.000937222	0.00089142	0.000995077	0.000858577	0.000556256	0.000477049	0.000498389	0.000583136
Acidimicrobiaceae_bacterium_TMED130	9.45033e-07	2.44048e-07	3.21089e-07	1.33459e-06	4.18552e-07	6.5323e-07	1.09564e-06	4.73193e-07	8.61224e-07	4.29014e-07	7.1179e-07	8.38605e-07	3.80712e-07	3.14173e-07	8.37749e-07	4.64325e-07	1.36869e-06	3.36823e-07	1.0362e-07	1.53703e-06	1.22567e-07	5.6925e-07	3.64171e-07	3.2723e-07
Acidimicrobiaceae_bacterium_TMED189	2.53339e-07	1.62083e-07	1.08061e-07	1.63228e-07	0	0	0	0	4.92946e-07	3.74414e-07	5.16205e-08	9.55586e-08	0	2.79117e-07	2.95337e-07	8.32522e-08	0	0	4.91067e-07	0	0	0	0	1.31514e-07
Acidimicrobiaceae_bacterium_TMED224	0	1.05174e-07	1.93668e-07	7.81966e-07	0	1.11854e-07	2.14271e-07	0	2.0531e-07	0	0	4.65052e-08	4.96996e-07	0	0	1.05736e-07	1.29859e-07	1.05313e-06	6.02376e-07	0	1.17664e-07	4.36903e-07	1.15408e-07	2.67146e-07
Acidimicrobiaceae_bacterium_TMED244	0	0	0	0	0	0	0	0	0	0	0	3.07755e-07	0	0	0	0	0	9.95609e-07	1.11899e-06	0	0	0	0	0
Acidimicrobiaceae_bacterium_TMED77	4.42541e-07	9.98485e-08	2.94325e-07	8.7294e-08	0	1.99248e-07	0	0	0	4.65299e-07	0	6.1131e-07	2.62915e-07	3.04112e-07	2.14523e-07	3.12678e-07	5.52039e-07	7.39808e-07	7.55038e-07	2.29908e-07	0	0	6.77012e-07	4.29875e-07
Acidimicrobiales_bacterium	0.000322857	0.000292006	0.000296463	0.0003754	0.000472515	0.000445197	0.000448594	0.000442204	0.000452978	0.000475563	0.000422978	0.000408894	0.000368347	0.000333311	0.0004191	0.000364281	0.000630282	0.000585	0.000640845	0.000571135	0.000356157	0.000314854	0.000333593	0.000372038
Acidimicrobiales_bacterium_20-64-4	2.13461e-07	1.84666e-07	1.60349e-07	1.70833e-07	8.54696e-07	3.46662e-07	0	2.63911e-07	0	1.9731e-07	2.43116e-07	1.64136e-07	1.91529e-07	2.92122e-07	7.72746e-08	0	0	1.32748e-07	1.32877e-07	3.69206e-07	0	1.05756e-07	0	2.25895e-07
Acidimicrobiales_bacterium_MED-G01	1.69221e-06	1.86218e-06	1.34868e-06	1.29578e-06	1.61106e-06	9.14549e-07	1.84358e-06	1.17487e-06	1.43448e-06	1.11331e-06	1.40928e-06	1.47379e-06	2.12707e-06	7.2651e-07	1.58732e-06	1.4029e-06	6.42083e-07	9.995e-07	1.40323e-06	9.70016e-07	4.22345e-07	6.69391e-07	7.6683e-07	1.10326e-06
Acidimicrobiales_bacterium_mtb01	1.03059e-05	1.27005e-05	1.29484e-05	1.57415e-05	1.34184e-05	1.45144e-05	1.23707e-05	1.40424e-05	1.76468e-05	2.02424e-05	1.82762e-05	1.41195e-05	1.26715e-05	1.2397e-05	1.57631e-05	1.36841e-05	2.20913e-05	2.23301e-05	2.8167e-05	2.41379e-05	1.57041e-05	1.10677e-05	1.38623e-05	1.63552e-05
Acidimicrobiia_bacterium	0.00187247	0.00168906	0.00175729	0.00217358	0.00283089	0.00280266	0.00259357	0.00260798	0.0028492	0.00283491	0.00261291	0.0027108	0.00224509	0.00200854	0.00243442	0.00214663	0.00402271	0.00361551	0.00404869	0.00351748	0.00203064	0.00187768	0.00180889	0.00210416
Acidimicrobiia_bacterium_BACL6_MAG-120322-bin79	4.55642e-07	8.14351e-07	5.4147e-07	3.36742e-07	4.69339e-07	2.89179e-07	3.03795e-07	0	1.05325e-06	4.89263e-07	3.9548e-07	3.70373e-07	5.31956e-07	7.79218e-07	3.47145e-07	1.05986e-06	2.56478e-07	6.00272e-07	4.76994e-07	1.41995e-06	0	6.43167e-07	6.29973e-07	7.13612e-07
Acidimicrobiia_bacterium_BACL6_MAG-120910-bin40	1.06707e-06	5.65238e-07	6.59772e-07	4.72009e-07	1.1407e-06	9.35341e-07	2.0796e-06	1.21047e-06	4.89296e-07	1.11668e-06	1.61123e-06	5.72955e-07	8.3579e-07	5.12208e-07	2.16592e-07	5.64366e-07	8.13974e-07	1.26487e-06	1.41182e-07	1.21127e-06	1.84879e-06	9.95407e-07	9.12558e-07	5.8289e-07
Acidimicrobiia_bacterium_BACL6_MAG-120924-bin43	0	9.73831e-08	0	0	5.91775e-08	1.90567e-07	0	0	4.27729e-07	0	0	3.28756e-07	9.7279e-08	0	0	9.49099e-07	0	0	1.56869e-07	0	1.03371e-06	0	1.20217e-07	1.18525e-07
Acidimicrobiia_bacterium_BACL6_MAG-121220-bin61	1.71348e-07	2.0758e-07	3.02389e-07	7.83895e-07	5.12773e-07	0	8.29666e-07	8.72403e-08	1.59517e-07	3.70933e-07	4.03875e-07	0	3.79896e-07	2.79117e-07	6.03288e-07	0	0	0	0	3.80394e-07	2.81339e-07	5.3065e-07	2.3714e-07	2.61833e-07
Acidimicrobium_ferrooxidans	5.87472e-06	3.78295e-06	4.7454e-06	8.33818e-06	5.09204e-06	5.16111e-06	7.31722e-06	5.42954e-06	4.27428e-06	7.32967e-06	5.52065e-06	7.10527e-06	4.31349e-06	5.64914e-06	5.33777e-06	6.03424e-06	9.08588e-06	8.45714e-06	8.44117e-06	7.07228e-06	6.231e-06	3.37221e-06	3.70542e-06	5.29611e-06
Acidimicrobium_sp.	3.01466e-06	1.27425e-06	1.24049e-06	1.23228e-06	4.30322e-07	2.81716e-06	6.85479e-07	1.00291e-06	3.26587e-06	3.01795e-06	3.43734e-06	4.72957e-06	1.91616e-06	2.01984e-06	2.28229e-06	1.40068e-06	3.814e-06	2.93582e-06	3.92731e-06	2.91708e-06	2.49537e-06	2.78342e-06	1.83872e-06	2.92622e-06
Acidimicrobium_sp._BACL17_MAG-120823-bin42	1.01705e-06	1.11237e-06	5.77237e-07	1.80858e-07	8.17564e-07	5.97078e-07	2.07931e-07	1.61468e-06	6.93098e-07	7.43337e-07	8.77459e-07	5.40132e-07	4.22805e-07	6.07102e-07	2.19519e-06	8.79013e-08	6.49294e-07	5.94393e-07	1.20906e-06	1.17953e-06	5.88322e-07	2.01318e-07	3.37232e-07	2.56015e-07
Acidimicrobium_sp._BACL17_MAG-120924-bin0	1.0752e-06	7.84639e-07	6.9125e-07	1.87145e-07	1.08407e-06	6.98905e-07	5.87415e-07	0	1.2504e-06	9.38587e-07	5.69275e-07	1.5854e-07	3.23921e-07	3.65073e-07	1.50157e-06	4.5011e-07	1.4209e-06	1.52991e-06	4.25362e-07	1.98937e-06	1.40375e-06	6.71524e-07	1.10165e-06	5.30822e-07
Acidimicrobium_sp._BACL19_MAG-120924-bin39	6.97394e-07	3.60283e-07	5.67029e-07	1.54629e-06	3.64579e-07	1.01213e-07	5.12272e-07	1.03799e-06	1.51586e-07	8.34715e-07	6.52485e-07	3.55114e-07	5.79016e-07	7.59921e-07	4.46427e-07	3.35237e-07	6.49292e-07	2.45324e-07	1.75113e-06	1.14298e-06	8.27847e-07	4.42937e-07	4.21225e-07	0
Acidimicrobium_sp._BACL27_MAG-120823-bin4	1.00462e-07	5.5404e-07	4.14235e-07	9.13075e-08	1.96093e-07	1.15193e-07	5.61946e-07	5.90828e-07	0	1.79167e-07	1.84264e-07	7.24591e-07	8.05068e-08	1.10772e-06	2.5086e-07	3.85505e-07	3.59164e-07	4.66519e-07	0	2.76371e-07	3.47474e-07	0	6.45942e-07	1.33341e-07
Acidiphilium_angustum	2.21494e-07	1.23908e-07	8.34885e-07	3.73559e-07	7.08897e-08	2.00466e-07	8.74614e-07	9.74521e-07	1.60399e-07	1.659e-07	4.80166e-07	4.16464e-07	0	6.57036e-07	0	0	5.95481e-07	0	3.80315e-07	0	0	4.85738e-07	0	1.81778e-07
Acidiphilium_cryptum	7.765e-07	1.40454e-06	7.68066e-07	9.58377e-07	6.01054e-07	1.19554e-06	1.01561e-06	1.40244e-06	6.33876e-07	3.71797e-07	1.33261e-06	8.93515e-07	1.48459e-06	1.18465e-06	5.47351e-07	7.67345e-07	1.47724e-06	5.30416e-07	9.61899e-07	5.76547e-07	2.84969e-07	7.55271e-07	1.30263e-06	1.13587e-06
Acidiphilium_multivorum	4.79601e-06	4.83347e-06	4.27153e-06	2.9151e-06	5.23139e-06	6.89635e-06	5.34218e-06	4.06536e-06	3.17156e-06	2.3144e-06	2.66616e-06	1.76301e-06	2.80949e-06	2.02412e-06	1.70832e-06	2.95537e-06	3.95015e-06	1.51127e-06	1.92309e-06	1.82918e-06	1.66574e-06	1.14564e-06	1.58893e-06	2.28334e-06
Acidiphilium_rubrum	1.73406e-06	3.4077e-06	3.58945e-06	2.55536e-06	2.85839e-06	2.17441e-06	4.14141e-06	3.17668e-06	1.39414e-06	3.07117e-06	5.44003e-06	2.34043e-06	2.75697e-06	1.59084e-06	2.47681e-06	2.24804e-06	2.58194e-06	1.21245e-06	2.13585e-06	2.57569e-06	2.58672e-06	1.30691e-06	1.33626e-06	2.60746e-06
Acidiphilium_sp._20-67-58	1.37857e-06	1.41513e-06	9.9317e-07	9.34179e-07	8.74544e-07	2.06406e-06	2.09788e-06	2.23246e-06	1.00888e-06	8.75496e-07	8.9972e-07	1.34346e-07	2.2568e-06	1.58888e-06	1.26349e-06	6.73958e-07	4.7709e-07	1.01659e-06	7.64362e-07	1.96556e-07	1.05292e-06	1.16103e-06	1.46041e-06	1.89011e-06
Acidiphilium_sp._21-60-14	3.91286e-07	1.33308e-07	4.78045e-07	8.48634e-07	4.96631e-07	9.21918e-07	4.06405e-07	6.91696e-07	5.13275e-07	7.67101e-07	1.4924e-07	5.89435e-07	2.46971e-07	4.52789e-08	4.79102e-08	1.20874e-07	2.8929e-07	0	0	1.03573e-07	1.17664e-07	4.99671e-07	8.56992e-08	6.40036e-08
Acidiphilium_sp._21-62-4	5.63932e-07	1.7088e-06	5.72824e-07	2.0776e-07	2.5628e-07	6.77764e-07	9.8419e-07	1.34397e-06	0	4.32986e-07	0	2.79031e-07	8.5737e-07	6.27229e-07	2.87461e-07	5.81048e-07	0	0	1.17285e-06	0	0	0	0	1.39138e-07
Acidiphilium_sp._21-66-27	8.59336e-07	1.76416e-06	6.36429e-07	1.25184e-06	9.33374e-07	2.38681e-06	1.22359e-06	1.74254e-06	5.2744e-07	1.11339e-07	1.07666e-07	2.85675e-07	3.82668e-07	1.94052e-07	1.81478e-07	4.54277e-07	1.10675e-07	0	0	0	3.78207e-07	0	0	4.17415e-07
Acidiphilium_sp._21-68-69	1.09252e-07	3.42958e-07	9.32029e-08	3.22044e-07	4.67783e-07	0	0	9.62795e-07	2.05896e-07	5.25421e-07	5.65635e-07	6.44874e-07	4.71011e-07	8.97183e-07	4.61932e-07	1.22389e-07	2.62894e-07	2.16797e-07	6.02465e-07	7.45219e-07	2.91204e-07	4.70687e-07	0	0
Acidiphilium_sp._34-60-192	8.09801e-07	2.30407e-06	3.01526e-06	1.97164e-06	2.79033e-06	2.64807e-06	3.53823e-06	2.20069e-06	1.37785e-06	1.41174e-06	1.2057e-06	1.04695e-06	2.22736e-06	2.03364e-06	2.18594e-06	2.63529e-06	2.83295e-06	5.90386e-07	1.50613e-06	2.35642e-06	1.83104e-06	1.51893e-06	2.74616e-06	3.74296e-06
Acidiphilium_sp._34-64-41	9.35076e-07	3.2389e-06	1.55642e-06	1.71185e-06	2.17943e-06	1.97214e-06	3.76533e-06	1.23509e-06	6.09838e-07	1.23388e-06	9.46415e-07	6.83608e-07	1.25175e-06	2.31876e-06	6.35124e-07	2.35104e-06	8.41216e-07	1.5828e-06	1.41747e-06	1.27092e-06	1.85515e-06	1.63661e-06	1.56241e-06	1.07283e-06
Acidiphilium_sp._37-60-79	9.28712e-07	1.56156e-06	1.49871e-06	1.54849e-06	1.08352e-06	5.92328e-07	6.40217e-07	1.12321e-06	5.70983e-07	1.3338e-06	1.07089e-06	5.52342e-07	1.20131e-06	9.34953e-07	6.69359e-07	1.09445e-06	1.88633e-06	2.999e-06	2.23289e-06	6.51829e-07	3.24357e-06	9.68201e-07	1.00569e-06	1.75769e-06
Acidiphilium_sp._37-64-53	2.18504e-07	5.46834e-07	0	0	3.53528e-07	0	3.20714e-07	9.74373e-08	3.84956e-07	0	0	1.75498e-07	1.1128e-09	0	0	9.2352e-08	0	0	0	0	3.48348e-07	0	2.1913e-07	8.97247e-08
Acidiphilium_sp._37-67-22	2.63114e-07	2.51332e-06	2.27013e-07	6.58683e-07	9.61501e-07	2.50112e-07	1.15346e-06	8.26118e-07	7.38206e-07	8.0887e-07	9.44371e-07	3.01113e-07	6.2266e-07	7.04872e-07	7.44865e-07	5.53047e-07	8.14696e-07	4.84343e-07	1.66829e-06	8.30225e-08	8.16083e-07	3.91787e-07	5.71247e-07	1.30537e-06
Acidiphilium_sp._C61	1.17025e-06	2.46515e-06	1.23441e-06	1.91386e-06	2.5376e-06	2.0461e-06	2.73772e-06	2.79272e-06	1.24713e-06	1.45258e-06	8.96899e-07	8.72826e-07	1.22568e-06	1.08475e-06	1.65468e-06	2.04515e-06	1.93393e-06	5.24413e-07	2.11605e-06	1.91467e-06	1.5474e-06	1.11516e-06	1.5439e-06	3.24128e-06
Acidiphilium_sp._CAG:727	1.02826e-07	0	0	0	0	0	0	0	0	0	0	0	2.47203e-07	7.9904e-08	2.53642e-07	8.58331e-08	0	0	0	0	0	0	0	0
Acidiphilium_sp._JA12-A1	3.3446e-06	2.32812e-06	2.92274e-06	1.43663e-06	2.5224e-06	2.38767e-06	3.00689e-06	3.99209e-06	1.10757e-06	1.64017e-06	2.76382e-06	1.18941e-06	2.39987e-06	2.72655e-06	6.09599e-07	2.37255e-06	1.49552e-06	1.1074e-06	2.00636e-06	9.13708e-07	1.4809e-06	1.27514e-06	8.21368e-07	1.34123e-06
Acidiphilium_sp._PM	2.23652e-06	1.01015e-06	2.20673e-06	1.34735e-06	2.26096e-06	1.30371e-06	7.38443e-07	2.78961e-06	2.04156e-06	2.20264e-06	1.39888e-06	1.62534e-06	7.80068e-07	1.03321e-06	2.10401e-06	1.29556e-06	1.53714e-06	2.33962e-06	2.0314e-06	2.20062e-06	4.29925e-07	1.09912e-06	1.50744e-06	1.23163e-06
Acidipila_dinghuensis	4.6548e-05	7.42274e-05	5.8946e-05	5.44085e-05	7.46975e-05	8.0276e-05	8.25007e-05	9.71455e-05	2.02017e-05	2.18355e-05	2.15035e-05	2.55076e-05	3.73425e-05	3.82389e-05	3.24954e-05	4.805e-05	1.70167e-05	1.52539e-05	1.86201e-05	1.65733e-05	2.29276e-05	1.63689e-05	1.95301e-05	1.98727e-05
Acidipila_rosea	6.80615e-05	0.000111968	7.17053e-05	7.56053e-05	0.000112288	0.000111811	0.000111887	0.000134351	2.789e-05	3.27436e-05	2.86565e-05	3.64661e-05	5.33365e-05	5.55399e-05	4.7959e-05	6.98063e-05	2.5698e-05	1.92915e-05	2.35276e-05	2.38271e-05	2.32402e-05	1.74358e-05	2.06847e-05	2.69182e-05
Acidipila_sp.	0.000167998	0.000222189	0.000158241	0.000170185	0.00021871	0.000213335	0.000213635	0.000207742	0.000111308	0.000113227	0.000107363	0.000109306	0.000151626	0.000158915	0.000128658	0.000163619	8.57855e-05	7.76871e-05	8.63942e-05	7.89858e-05	0.000109194	8.45858e-05	8.79299e-05	0.000101684
Acidipila_sp._4G-K13	8.53024e-05	0.000126536	8.96866e-05	9.39865e-05	0.000122392	0.000120682	0.000124176	0.000152745	3.83784e-05	5.1358e-05	4.30103e-05	4.51747e-05	6.88391e-05	6.73622e-05	5.69229e-05	7.62506e-05	3.4391e-05	3.61481e-05	3.40595e-05	3.49254e-05	3.1789e-05	3.37909e-05	3.01298e-05	3.25374e-05
Acidipila_sp._EB88	1.53051e-05	2.07764e-05	1.77081e-05	1.78006e-05	2.41819e-05	2.91406e-05	2.51035e-05	2.60746e-05	1.11725e-05	8.41436e-06	6.52114e-06	7.68963e-06	1.24365e-05	1.05593e-05	1.00896e-05	1.45689e-05	8.68051e-06	7.30751e-06	6.66992e-06	6.0566e-06	9.36818e-06	6.8765e-06	5.71729e-06	8.03012e-06
Acidipropionibacterium_acidipropionici	3.39071e-07	1.09261e-06	6.15061e-07	1.55646e-06	1.24581e-06	1.6736e-06	8.25138e-07	1.24799e-06	1.00265e-06	0	2.94955e-07	9.73428e-07	3.988e-07	2.47591e-07	8.23176e-07	1.5839e-06	1.2815e-07	1.06598e-06	0	1.35855e-07	1.16116e-07	1.07668e-06	3.32908e-07	2.02117e-07
Acidipropionibacterium_jensenii	2.2127e-07	4.92911e-07	0	4.56538e-08	4.09889e-08	2.58744e-07	1.358e-06	1.47323e-07	2.1869e-07	1.4997e-06	5.08316e-07	3.68215e-07	0	2.38793e-07	4.95476e-07	3.03992e-07	0	3.09139e-07	4.34406e-07	0	7.89083e-07	1.22863e-07	1.1857e-07	1.24682e-07
Acidipropionibacterium_thoenii	3.39109e-07	0	9.81084e-08	6.09508e-07	3.72899e-07	1.01552e-07	4.1039e-07	0	0	2.9907e-07	1.98332e-07	2.7536e-07	9.21591e-08	1.78733e-07	3.57011e-07	0	0	4.33984e-07	0	0	1.07592e-06	1.81928e-07	1.04285e-07	1.07204e-06
Acidipropionibacterium_timonense	7.4597e-07	4.94585e-07	3.82454e-07	4.61669e-07	8.69583e-07	8.29888e-08	5.2941e-07	1.07181e-07	1.65573e-07	4.11803e-07	6.71748e-07	3.5781e-07	3.41646e-07	7.30305e-08	5.3483e-07	3.12857e-07	1.01452e-07	3.87555e-07	1.61351e-07	4.96674e-07	0	0	0	0
Acidipropionibacterium_virtanenii	0	1.20696e-07	0	1.73812e-07	3.73912e-07	3.72789e-07	1.05719e-06	6.63953e-08	1.25491e-06	3.5868e-07	2.43116e-07	5.0891e-07	3.04475e-07	3.1213e-07	2.35484e-07	5.21483e-07	1.2815e-07	1.95532e-07	0	8.93344e-07	7.56414e-07	3.2979e-07	3.13739e-07	8.84261e-07
Acidisarcina_polymorpha	7.29117e-05	0.000114332	8.16155e-05	8.28072e-05	0.000112689	0.000108013	0.000116	0.000143733	4.49452e-05	4.46705e-05	3.96542e-05	4.08321e-05	6.45573e-05	6.58958e-05	5.81585e-05	6.75267e-05	3.17876e-05	4.07636e-05	3.06817e-05	3.68326e-05	2.96371e-05	2.69871e-05	3.09594e-05	3.52074e-05
Acidisoma_sp._L85	3.59684e-06	5.14199e-06	5.78541e-06	4.31647e-06	5.42277e-06	3.6386e-06	4.41802e-06	7.59783e-06	2.30278e-06	2.395e-06	2.35602e-06	1.61573e-06	2.94825e-06	1.86847e-06	2.83689e-06	3.22628e-06	2.78579e-06	2.35603e-06	2.27416e-06	1.85209e-06	3.51824e-06	2.5089e-06	1.71419e-06	2.83549e-06
Acidisoma_sp._S159	2.76024e-06	4.59559e-06	3.78733e-06	5.40413e-06	6.62815e-06	6.03237e-06	5.31585e-06	9.71923e-06	3.78448e-06	2.35003e-06	4.87215e-06	3.9023e-06	4.03456e-06	5.10794e-06	2.55096e-06	4.16573e-06	4.68015e-06	3.2949e-06	3.01383e-06	3.43163e-06	4.90888e-06	2.4244e-06	3.05474e-06	3.38905e-06
Acidisphaera_rubrifaciens	1.11447e-05	1.5438e-05	1.11055e-05	1.18662e-05	1.64441e-05	1.13433e-05	1.41934e-05	1.48324e-05	7.99001e-06	1.29568e-05	6.8508e-06	7.33824e-06	1.1472e-05	1.19949e-05	1.36683e-05	1.3858e-05	1.26385e-05	1.03425e-05	1.01811e-05	6.12799e-06	5.80543e-06	8.00256e-06	7.7802e-06	9.0637e-06
Acidisphaera_sp._L21	1.30661e-05	2.49477e-05	1.72209e-05	1.45714e-05	1.57173e-05	1.60704e-05	2.04401e-05	2.29928e-05	9.97787e-06	1.28342e-05	1.49532e-05	1.11947e-05	1.59124e-05	1.37861e-05	1.07291e-05	1.47368e-05	1.19176e-05	1.52018e-05	1.21427e-05	1.20889e-05	1.14634e-05	1.3901e-05	1.16151e-05	1.51095e-05
Acidisphaera_sp._S103	7.70317e-05	9.31981e-05	7.70512e-05	8.05976e-05	7.68062e-05	7.46606e-05	8.65363e-05	9.30796e-05	5.64886e-05	5.15492e-05	5.71586e-05	5.16973e-05	7.55967e-05	7.26331e-05	6.79608e-05	7.51233e-05	5.05132e-05	4.60097e-05	5.24663e-05	4.63462e-05	4.79965e-05	3.79091e-05	4.8417e-05	4.66174e-05
Acidithiobacillales_bacterium_SG8_45	1.60718e-06	9.35507e-07	2.45878e-06	1.68085e-06	1.6482e-06	3.26492e-06	1.375e-06	2.09053e-06	4.39789e-06	2.14455e-06	3.99839e-06	2.4251e-06	2.92338e-06	2.1445e-06	2.30636e-06	3.05968e-06	2.40693e-06	3.00529e-06	4.26056e-06	5.55329e-06	2.43991e-06	2.38576e-06	7.34522e-07	3.17403e-06
Acidithiobacillales_bacterium_SM1_46	1.95936e-05	1.93611e-05	1.82027e-05	2.23571e-05	1.58916e-05	1.5385e-05	1.70666e-05	1.75735e-05	1.64626e-05	2.10088e-05	2.04567e-05	2.039e-05	1.88675e-05	1.79713e-05	1.74073e-05	1.75595e-05	1.99074e-05	1.86982e-05	1.59252e-05	1.53328e-05	1.87115e-05	1.06907e-05	1.36788e-05	1.665e-05
Acidithiobacillales_bacterium_SM23_46	7.91982e-06	7.86852e-06	9.52926e-06	9.38758e-06	5.31828e-06	6.71616e-06	8.78834e-06	7.50012e-06	6.1934e-06	8.55467e-06	7.7433e-06	7.43754e-06	8.34019e-06	6.2006e-06	9.42535e-06	9.09968e-06	7.3643e-06	4.73394e-06	5.8447e-06	7.69139e-06	8.12925e-06	7.11696e-06	5.95512e-06	5.75509e-06
Acidithiobacillus_albertensis	5.67544e-07	0	2.17826e-07	2.60451e-07	0	0	6.39132e-08	1.94875e-07	0	9.99199e-08	2.93634e-07	0	0	1.7415e-07	1.8427e-07	3.74144e-07	0	0	1.5472e-07	0	3.62664e-07	0	0	0
Acidithiobacillus_caldus	3.00455e-06	2.77009e-06	3.40061e-06	3.12919e-06	4.26084e-06	3.24973e-06	4.43609e-06	4.92079e-06	1.90276e-06	2.46351e-06	3.61593e-06	4.52518e-06	2.13268e-06	2.87387e-06	2.12417e-06	2.78499e-06	1.61986e-06	1.71202e-06	1.21348e-06	2.99566e-06	9.80685e-07	5.25257e-07	1.7141e-06	1.92295e-06
Acidithiobacillus_ferrianus	2.99656e-06	2.91973e-06	4.32888e-06	3.32478e-06	4.1326e-06	3.89091e-06	3.34293e-06	2.33254e-06	1.81434e-06	1.84007e-06	2.61701e-06	1.92933e-06	1.50273e-06	1.76788e-06	2.03337e-06	3.69539e-06	1.55164e-06	2.86584e-06	3.80143e-06	1.06617e-06	2.29377e-06	1.17936e-06	1.78681e-06	2.23903e-06
Acidithiobacillus_ferridurans	1.12237e-06	1.37288e-06	3.55548e-07	1.99334e-06	1.47053e-06	1.39145e-06	1.44433e-06	1.75992e-06	1.27283e-06	1.56686e-06	3.71873e-06	1.5334e-06	1.95786e-06	6.17856e-07	1.08449e-06	1.10418e-06	1.29658e-06	1.11036e-06	8.58313e-07	4.95186e-07	2.33492e-06	1.5278e-06	1.77287e-06	1.60268e-06
Acidithiobacillus_ferrivorans	4.52658e-06	8.99332e-06	5.5824e-06	6.63361e-06	6.31213e-06	6.85632e-06	7.11682e-06	9.03082e-06	5.0482e-06	6.72346e-06	4.37732e-06	2.91589e-06	6.41779e-06	7.08391e-06	6.95418e-06	4.10143e-06	4.3132e-06	3.37618e-06	4.5403e-06	5.01734e-06	5.04924e-06	6.77987e-06	3.74584e-06	3.81156e-06
Acidithiobacillus_ferrooxidans	7.13137e-06	5.93607e-06	5.07796e-06	5.21177e-06	4.79465e-06	5.98345e-06	5.09173e-06	5.69371e-06	7.44567e-06	3.48941e-06	6.27163e-06	5.55216e-06	6.72913e-06	4.36639e-06	5.99184e-06	4.3515e-06	7.32631e-06	7.85445e-06	1.80295e-05	8.66185e-06	5.72403e-06	4.871e-06	7.13693e-06	4.41922e-06
Acidithiobacillus_phage_AcaML1	0	0	0	3.73824e-07	0	0	0	0	0	0	0	0	0	0	0	0	0	0	0	0	0	0	0	0
Acidithiobacillus_sp.	3.67332e-06	2.91212e-06	2.11989e-06	2.44316e-06	2.56671e-06	2.77185e-06	3.25089e-06	3.01962e-06	3.52603e-06	5.4822e-06	5.18965e-06	4.67904e-06	3.99779e-06	5.03193e-06	5.4734e-06	2.3575e-06	4.64959e-06	3.70862e-06	4.36082e-06	1.92725e-06	2.38312e-06	1.11995e-06	2.99056e-06	2.58528e-06
Acidithiobacillus_sp._AMD_consortium	5.46687e-07	3.26401e-07	8.08493e-07	6.23935e-07	6.93948e-07	3.5651e-07	5.45274e-08	1.03485e-07	1.13994e-06	1.09004e-07	4.54322e-07	2.17827e-07	2.44898e-07	4.70545e-07	3.15974e-07	0	2.43485e-07	0	9.41212e-08	5.53122e-07	9.65333e-07	5.52194e-07	4.69749e-07	8.03153e-07
Acidithiobacillus_sp._GGI-221	0	3.9664e-07	1.11287e-07	8.0952e-07	1.97258e-07	5.75967e-07	0	2.2396e-07	4.05217e-07	1.12953e-07	3.27678e-07	2.03683e-07	0	1.9976e-07	0	8.50255e-07	1.41151e-07	1.0353e-06	2.22473e-07	1.06124e-06	0	0	1.25444e-07	0
Acidithiobacillus_sp._SH	1.02487e-06	1.10279e-06	7.86297e-07	8.6685e-07	1.18444e-06	5.63355e-08	9.12322e-07	1.89424e-06	1.4687e-06	7.81771e-07	1.09707e-06	1.87542e-06	8.60841e-07	6.50699e-07	1.23604e-06	6.51681e-07	8.32568e-07	4.77968e-07	2.10354e-07	5.99779e-07	1.07811e-06	2.86459e-07	6.06945e-07	9.03041e-07
Acidithiobacillus_sulfuriphilus	3.94475e-06	2.5773e-06	3.23248e-06	2.95108e-06	1.91401e-06	4.94718e-06	1.81157e-06	4.04217e-06	3.64343e-06	2.92544e-06	2.55393e-06	2.9121e-06	2.63131e-06	4.01849e-06	1.90143e-06	3.40519e-06	2.61848e-06	4.47335e-06	1.11751e-06	3.87977e-06	2.55862e-06	1.28476e-06	1.82645e-06	1.48553e-06
Acidithiobacillus_thiooxidans	4.84017e-06	4.65299e-06	4.2335e-06	5.91024e-06	8.41177e-06	6.65818e-06	7.14717e-06	6.2238e-06	4.0531e-06	3.06282e-06	4.12614e-06	4.12272e-06	4.01177e-06	2.58602e-06	3.41155e-06	3.20395e-06	3.49931e-06	2.58064e-06	3.66326e-06	2.81977e-06	4.30681e-06	3.09629e-06	5.48707e-06	4.5282e-06
Acidithrix_ferrooxidans	6.75574e-06	8.53693e-06	8.25155e-06	7.55034e-06	1.66726e-05	1.28802e-05	1.16222e-05	1.20363e-05	1.11211e-05	1.04513e-05	8.34217e-06	1.01836e-05	1.14306e-05	7.43975e-06	8.00668e-06	6.5122e-06	1.36403e-05	1.62631e-05	1.61961e-05	1.16948e-05	7.21875e-06	7.88137e-06	5.55708e-06	9.00409e-06
Acidobacteria_bacterium	0.163446	0.14622	0.154659	0.156187	0.149771	0.148965	0.149771	0.139809	0.151228	0.154453	0.164353	0.155848	0.142272	0.123817	0.151271	0.141951	0.166822	0.157855	0.162911	0.147221	0.168517	0.141462	0.13846	0.158058
Acidobacteria_bacterium_13_1_20CM_2_55_15	7.90258e-05	9.19047e-05	7.74193e-05	0.00011146	8.4126e-05	7.97691e-05	8.68328e-05	7.12992e-05	5.68062e-05	6.5941e-05	7.10475e-05	6.5078e-05	6.98675e-05	5.95941e-05	6.02051e-05	6.31545e-05	5.5727e-05	4.66914e-05	4.78532e-05	4.95873e-05	7.07337e-05	5.18416e-05	5.92155e-05	5.79357e-05
Acidobacteria_bacterium_13_1_20CM_2_57_8	0.000126464	0.000133816	0.000129924	0.000156565	0.000120674	0.000120022	0.000120702	0.000107492	9.82367e-05	0.000110416	0.00011584	0.000114591	0.000104658	8.87995e-05	0.000107299	0.000103795	0.000102422	8.95922e-05	8.27683e-05	7.91023e-05	0.000118892	9.24381e-05	0.000103067	9.89839e-05
Acidobacteria_bacterium_13_1_20CM_2_60_10	4.60486e-05	5.12942e-05	3.50478e-05	3.51804e-05	4.39695e-05	4.60188e-05	3.73018e-05	4.34038e-05	2.03678e-05	2.42699e-05	2.40947e-05	2.11366e-05	3.18152e-05	3.82802e-05	2.21558e-05	4.08974e-05	1.46373e-05	1.5851e-05	1.86194e-05	1.83846e-05	2.20683e-05	1.32077e-05	1.72029e-05	1.80666e-05
Acidobacteria_bacterium_13_1_20CM_2_65_9	0.00110479	0.000908578	0.000956855	0.000959213	0.000884361	0.000868371	0.000858268	0.000812886	0.000977314	0.00096581	0.00107047	0.000991004	0.000905051	0.000766803	0.000954814	0.000894432	0.00109335	0.0009778	0.00100591	0.000927299	0.00112752	0.000945717	0.000920167	0.00105496
Acidobacteria_bacterium_13_1_20CM_2_68_14	1.8365e-05	1.91675e-05	2.71826e-05	2.29652e-05	2.10526e-05	1.8386e-05	1.8821e-05	1.65595e-05	1.91706e-05	2.30383e-05	3.19024e-05	2.20344e-05	1.69095e-05	1.75377e-05	1.8073e-05	1.92333e-05	1.68723e-05	1.42833e-05	1.42067e-05	1.26858e-05	1.86376e-05	1.55005e-05	1.56746e-05	2.08799e-05
Acidobacteria_bacterium_13_1_20CM_2_68_7	1.89491e-05	1.6979e-05	1.95362e-05	1.38564e-05	1.31085e-05	1.3153e-05	1.48706e-05	1.19104e-05	1.81686e-05	1.75969e-05	1.95685e-05	1.95814e-05	1.60214e-05	1.26131e-05	1.60061e-05	1.66818e-05	2.08594e-05	1.70566e-05	1.65381e-05	1.86581e-05	1.67576e-05	1.29792e-05	1.42858e-05	1.7465e-05
Acidobacteria_bacterium_13_1_20CM_3_53_8	0.000793578	0.00070017	0.0007869	0.000798238	0.000777917	0.000814722	0.000813738	0.000712264	0.000777963	0.000762681	0.000969125	0.000824376	0.000617286	0.000621407	0.000706196	0.000636777	0.000900874	0.000799676	0.000782132	0.000783469	0.00106035	0.000885387	0.000841322	0.00102899
Acidobacteria_bacterium_13_1_20CM_3_58_11	3.53479e-05	4.37228e-05	2.78332e-05	3.24285e-05	3.75142e-05	3.24383e-05	4.98042e-05	6.33206e-05	1.88256e-05	1.43591e-05	1.39902e-05	1.42833e-05	1.95842e-05	2.61313e-05	1.93662e-05	2.9157e-05	9.70199e-06	1.00362e-05	9.24891e-06	1.07119e-05	1.02027e-05	7.97762e-06	1.20764e-05	9.33856e-06
Acidobacteria_bacterium_13_1_20CM_4_56_7	0.000356448	0.000513964	0.000372084	0.000347349	0.00050357	0.000491652	0.000489833	0.000507452	0.000124412	0.00013424	0.000102821	0.000141621	0.00020546	0.000260474	0.000203125	0.000298968	2.44385e-05	1.23823e-05	1.82457e-05	2.26839e-05	3.85242e-05	2.64738e-05	4.94519e-05	4.079e-05
Acidobacteria_bacterium_13_1_20CM_4_57_11	4.08781e-05	6.48475e-05	4.32998e-05	3.92037e-05	4.98147e-05	5.65968e-05	5.1814e-05	5.34319e-05	2.11931e-05	2.4481e-05	2.32166e-05	2.08691e-05	2.49471e-05	3.81343e-05	2.52097e-05	4.04502e-05	2.15082e-05	1.5435e-05	1.90191e-05	2.06932e-05	2.22368e-05	1.69913e-05	1.92787e-05	2.20637e-05
Acidobacteria_bacterium_13_1_20CM_58_21	5.33978e-05	7.34527e-05	4.67003e-05	5.53887e-05	7.11938e-05	6.8507e-05	6.61974e-05	7.33603e-05	2.65606e-05	2.57065e-05	2.75348e-05	2.4707e-05	3.15017e-05	3.75354e-05	3.40845e-05	4.38584e-05	1.9265e-05	1.7734e-05	1.55826e-05	1.67938e-05	2.3522e-05	1.73558e-05	1.94138e-05	2.08293e-05
Acidobacteria_bacterium_13_1_40CM_2_56_11	6.9329e-05	7.21269e-05	6.0685e-05	7.07103e-05	5.87722e-05	5.96567e-05	5.97926e-05	5.56893e-05	4.90209e-05	5.17294e-05	6.2185e-05	5.29708e-05	4.93581e-05	4.58133e-05	4.80874e-05	5.28898e-05	3.78135e-05	3.7642e-05	4.29223e-05	4.06383e-05	5.43342e-05	4.04538e-05	4.56419e-05	4.84443e-05
Acidobacteria_bacterium_13_1_40CM_2_56_5	7.30971e-05	8.06608e-05	7.5665e-05	9.46049e-05	7.20789e-05	6.47335e-05	6.64978e-05	6.64542e-05	4.40267e-05	4.77752e-05	6.35162e-05	5.30388e-05	5.44698e-05	5.46145e-05	5.77916e-05	6.12668e-05	4.94043e-05	4.06983e-05	4.82363e-05	4.22608e-05	6.82355e-05	4.73534e-05	4.87538e-05	5.33319e-05
Acidobacteria_bacterium_13_1_40CM_2_60_7	3.14064e-05	4.82881e-05	2.33462e-05	3.13549e-05	3.26469e-05	3.74274e-05	3.65396e-05	3.53463e-05	9.67193e-06	1.31743e-05	1.26676e-05	1.06513e-05	1.99382e-05	3.19789e-05	1.67569e-05	3.14466e-05	6.44853e-06	5.76062e-06	6.99998e-06	5.98943e-06	9.10225e-06	5.23525e-06	7.42044e-06	9.20291e-06
Acidobacteria_bacterium_13_1_40CM_2_64_6	0.000187945	0.00016765	0.000168812	0.000161845	0.000159636	0.000149797	0.000148212	0.000155802	0.000140232	0.000155084	0.000157268	0.000152157	0.000151888	0.000124536	0.000147105	0.000143322	0.000167447	0.000138705	0.000152672	0.000143605	0.000159666	0.000124961	0.000137423	0.000141019
Acidobacteria_bacterium_13_1_40CM_2_68_10	1.71607e-05	1.26736e-05	1.57708e-05	1.28362e-05	1.16979e-05	1.33425e-05	1.23552e-05	1.15689e-05	1.19231e-05	1.5676e-05	2.37228e-05	2.06882e-05	9.5824e-06	1.09156e-05	1.23076e-05	1.53083e-05	1.26177e-05	1.54349e-05	1.52786e-05	1.0097e-05	1.204e-05	9.75116e-06	1.10541e-05	1.94879e-05
Acidobacteria_bacterium_13_1_40CM_2_68_5	3.02179e-05	3.51087e-05	3.88746e-05	3.16669e-05	2.7177e-05	3.06707e-05	2.59126e-05	2.73999e-05	2.69845e-05	3.72474e-05	4.4534e-05	3.08189e-05	2.7399e-05	2.71855e-05	3.02154e-05	3.43541e-05	3.3609e-05	3.45393e-05	2.85314e-05	3.35215e-05	2.97272e-05	3.00669e-05	2.59562e-05	3.27252e-05
Acidobacteria_bacterium_13_1_40CM_3_55_6	0.000201273	0.000202821	0.000181595	0.000188136	0.000177964	0.000185458	0.00019958	0.000166898	0.000198696	0.000194574	0.000248431	0.000215014	0.000154729	0.000148486	0.00015891	0.0001547	0.000240711	0.000230197	0.000248384	0.000222712	0.000279996	0.00022995	0.000211339	0.000264897
Acidobacteria_bacterium_13_1_40CM_3_56_11	6.81129e-05	7.59194e-05	6.48283e-05	7.76574e-05	6.28484e-05	5.52567e-05	6.65948e-05	6.00148e-05	5.10128e-05	5.25852e-05	5.8585e-05	5.50772e-05	4.96468e-05	4.70686e-05	5.27254e-05	4.91946e-05	5.77916e-05	4.5609e-05	3.85711e-05	4.18624e-05	6.13682e-05	4.63695e-05	4.8481e-05	5.56577e-05
Acidobacteria_bacterium_13_1_40CM_3_65_5	0.000434023	0.000365944	0.000381096	0.000394359	0.00035898	0.000329847	0.000330407	0.000328221	0.00036011	0.000375224	0.000421757	0.000376619	0.000347381	0.000308161	0.00036488	0.000341418	0.000362547	0.00034655	0.000328329	0.000346696	0.00037895	0.000328629	0.000336907	0.000371669
Acidobacteria_bacterium_13_1_40CM_4_57_6	2.98653e-05	4.10428e-05	2.34836e-05	2.78618e-05	3.11875e-05	3.2713e-05	3.3033e-05	2.89787e-05	1.55774e-05	1.29934e-05	1.54381e-05	1.30881e-05	1.68584e-05	2.61033e-05	1.55607e-05	2.41032e-05	1.25214e-05	1.02799e-05	1.02589e-05	8.71354e-06	1.35403e-05	1.16494e-05	1.11482e-05	1.36015e-05
Acidobacteria_bacterium_13_1_40CM_4_58_4	0.000228308	0.000344365	0.000223096	0.000224328	0.000317112	0.000321042	0.00032495	0.000301491	8.43215e-05	8.93e-05	8.328e-05	9.12096e-05	0.000114653	0.000128193	0.000104783	0.000149771	5.71217e-05	4.64165e-05	4.80202e-05	4.6996e-05	6.88002e-05	5.47663e-05	6.18508e-05	6.39441e-05
Acidobacteria_bacterium_13_1_40CM_4_61_5	2.09884e-05	3.33166e-05	1.48859e-05	2.03604e-05	2.26704e-05	2.44395e-05	2.26066e-05	2.19029e-05	8.00769e-06	9.52499e-06	7.78603e-06	8.26096e-06	1.52155e-05	2.14202e-05	8.80355e-06	2.24306e-05	6.7618e-06	6.35604e-06	6.5366e-06	5.23026e-06	8.49195e-06	5.61663e-06	4.97285e-06	8.81571e-06
Acidobacteria_bacterium_13_1_40CM_4_65_8	0.000872574	0.000735003	0.000760317	0.000768442	0.000708797	0.0006737	0.000667687	0.000647451	0.000779131	0.000760379	0.000867165	0.000806205	0.000724248	0.000606141	0.00075098	0.000689992	0.000841	0.000722609	0.000778572	0.000720305	0.000865467	0.000735754	0.000715733	0.000783511
Acidobacteria_bacterium_13_1_40CM_4_69_4	1.02662e-05	1.16758e-05	1.22813e-05	1.20719e-05	9.36355e-06	9.46603e-06	8.41261e-06	5.68736e-06	8.53137e-06	1.09589e-05	1.27821e-05	8.77971e-06	8.5184e-06	8.26325e-06	1.1395e-05	9.53245e-06	1.04834e-05	9.71021e-06	1.61237e-05	9.38109e-06	8.85931e-06	6.43235e-06	5.25219e-06	9.06972e-06
Acidobacteria_bacterium_13_1_40CM_56_16	6.12946e-05	7.39465e-05	5.71635e-05	7.29589e-05	6.59314e-05	5.74766e-05	6.22759e-05	5.98798e-05	3.95479e-05	4.4875e-05	4.66746e-05	4.36285e-05	4.61897e-05	4.94719e-05	4.64718e-05	5.98571e-05	4.09526e-05	3.66373e-05	3.44786e-05	3.24872e-05	5.50368e-05	3.4866e-05	4.13726e-05	4.23946e-05
Acidobacteria_bacterium_13_1_40CM_65_14	0.000963515	0.000786865	0.000826179	0.000837808	0.000755646	0.000737629	0.000757644	0.000701926	0.000883126	0.000863432	0.000969589	0.000932993	0.000811156	0.000698761	0.000841971	0.000774766	0.000974087	0.000941236	0.000923662	0.000864703	0.00101779	0.000857077	0.000836201	0.000928528
Acidobacteria_bacterium_13_2_20CM_2_57_12	3.18705e-05	4.243e-05	2.60316e-05	3.1685e-05	3.47748e-05	3.26708e-05	3.20241e-05	3.74697e-05	1.5347e-05	1.59496e-05	1.62317e-05	1.42499e-05	2.14204e-05	2.40383e-05	1.47878e-05	2.69904e-05	1.07122e-05	1.14299e-05	1.07308e-05	1.086e-05	1.63369e-05	1.29179e-05	1.45901e-05	1.35582e-05
Acidobacteria_bacterium_13_2_20CM_2_57_6	4.29592e-05	5.44409e-05	3.49205e-05	4.61537e-05	4.24234e-05	4.66503e-05	3.97732e-05	4.68056e-05	2.0946e-05	1.84887e-05	2.06171e-05	2.22498e-05	2.70342e-05	2.8647e-05	2.49836e-05	3.43863e-05	1.24262e-05	1.30289e-05	1.55017e-05	1.23616e-05	1.81383e-05	1.47258e-05	1.7518e-05	1.48856e-05
Acidobacteria_bacterium_13_2_20CM_2_66_4	0.000320355	0.000266492	0.000271517	0.000266476	0.000268335	0.000257893	0.000253683	0.00024414	0.000265591	0.000264572	0.000293237	0.000288152	0.000270076	0.000218222	0.000276452	0.000255213	0.000262125	0.000245677	0.000236854	0.000231397	0.000278607	0.00024297	0.00024315	0.000264553
Acidobacteria_bacterium_13_2_20CM_56_17	2.88892e-05	3.36019e-05	2.70705e-05	2.72772e-05	3.25649e-05	3.44416e-05	4.02492e-05	3.32022e-05	1.4484e-05	1.36789e-05	1.56896e-05	1.29055e-05	1.55558e-05	1.58075e-05	1.37993e-05	1.56013e-05	8.0543e-06	7.51074e-06	8.33042e-06	7.95444e-06	1.36311e-05	8.91e-06	1.03135e-05	1.00227e-05
Acidobacteria_bacterium_13_2_20CM_57_17	4.73393e-05	6.19594e-05	3.26843e-05	3.81287e-05	5.28463e-05	5.05459e-05	4.02948e-05	4.94905e-05	1.98742e-05	2.16254e-05	1.77574e-05	2.10813e-05	2.71695e-05	3.81819e-05	2.45151e-05	3.48845e-05	1.54214e-05	1.37601e-05	1.33838e-05	1.23391e-05	1.64299e-05	1.44073e-05	1.47105e-05	1.36077e-05
Acidobacteria_bacterium_13_2_20CM_57_7	1.51535e-05	2.49058e-05	1.34654e-05	1.55186e-05	1.83831e-05	1.71437e-05	1.56746e-05	1.64334e-05	6.56306e-06	4.78223e-06	5.54115e-06	5.6172e-06	1.08279e-05	1.33299e-05	7.0789e-06	1.22005e-05	6.59213e-06	5.35825e-06	7.15871e-06	6.23906e-06	6.3336e-06	3.56697e-06	4.76918e-06	7.07615e-06
Acidobacteria_bacterium_13_2_20CM_58_27	5.28734e-05	7.56602e-05	4.73679e-05	5.76342e-05	7.31938e-05	6.60288e-05	6.24713e-05	6.77138e-05	2.78004e-05	2.92336e-05	3.09372e-05	2.78646e-05	3.27684e-05	3.6229e-05	3.84629e-05	3.89136e-05	2.56145e-05	1.86293e-05	2.34793e-05	1.73701e-05	2.90902e-05	1.92229e-05	2.36353e-05	2.40436e-05
Acidobacteria_bacterium_21-70-11	9.5228e-06	1.05579e-05	1.40894e-05	1.03651e-05	1.21981e-05	1.38381e-05	9.328e-06	1.26393e-05	1.059e-05	8.30386e-06	8.63556e-06	1.03158e-05	1.19663e-05	1.01803e-05	8.17005e-06	1.0631e-05	5.97305e-06	6.96041e-06	7.69189e-06	5.46346e-06	6.13122e-06	6.51279e-06	6.2315e-06	7.06789e-06
Acidobacteria_bacterium_37-65-4	5.28922e-05	5.00049e-05	5.13008e-05	5.84339e-05	5.05381e-05	5.48705e-05	5.28499e-05	4.61712e-05	5.44242e-05	5.37485e-05	4.3859e-05	5.17348e-05	5.89816e-05	5.02508e-05	5.36876e-05	5.82421e-05	4.96028e-05	5.06099e-05	5.00566e-05	4.02344e-05	4.80977e-05	3.77661e-05	3.48899e-05	3.80625e-05
Acidobacteria_bacterium_37-71-11	2.29158e-05	3.27514e-05	2.59128e-05	3.26942e-05	2.97743e-05	2.98807e-05	2.23644e-05	2.7286e-05	2.2624e-05	2.74268e-05	2.42453e-05	2.18076e-05	2.45653e-05	2.27428e-05	2.94865e-05	2.53018e-05	2.11228e-05	1.75442e-05	1.42205e-05	1.22416e-05	2.02665e-05	1.56051e-05	1.50383e-05	2.2302e-05
Acidobacteria_bacterium_AB60	0.000190894	0.000384709	0.000246595	0.00019767	0.00034294	0.000417389	0.000367108	0.000676347	6.82184e-05	8.66493e-05	6.02545e-05	8.64865e-05	0.000194685	0.000216686	0.000172488	0.000274091	5.03902e-05	4.05484e-05	3.87363e-05	4.35024e-05	4.92373e-05	4.32913e-05	4.6392e-05	4.67195e-05
Acidobacteria_bacterium_ADurb.Bin051	3.81787e-05	2.48022e-05	3.52765e-05	3.35676e-05	2.93767e-05	3.03031e-05	2.88836e-05	2.8266e-05	7.16865e-05	7.41565e-05	8.0432e-05	6.55517e-05	5.1369e-05	3.92236e-05	7.41463e-05	5.74395e-05	8.25155e-05	7.2223e-05	7.00907e-05	6.53852e-05	8.13194e-05	6.75613e-05	7.51771e-05	8.60455e-05
Acidobacteria_bacterium_ADurb.Bin340	8.57487e-06	9.52952e-06	8.42496e-06	1.01921e-05	6.62892e-06	9.39557e-06	1.11493e-05	6.3185e-06	7.82627e-06	6.75284e-06	7.40488e-06	6.45418e-06	9.20881e-06	6.84783e-06	8.04926e-06	8.10003e-06	9.17122e-06	5.26877e-06	7.26909e-06	7.04774e-06	7.56098e-06	7.00652e-06	6.72541e-06	3.95555e-06
Acidobacteria_bacterium_CG_4_9_14_3_um_filter_49_7	7.94173e-07	3.94755e-07	6.90937e-07	6.13072e-07	8.18891e-07	1.01308e-06	7.42003e-07	9.9036e-07	7.13593e-07	1.02549e-07	5.39002e-07	1.10029e-06	7.92113e-07	9.63398e-07	8.24008e-07	1.12509e-06	5.62591e-07	2.55284e-07	1.12262e-06	2.01917e-06	6.69226e-07	1.62452e-06	7.01375e-07	1.33341e-07
Acidobacteria_bacterium_Mor1	4.1456e-05	3.07888e-05	4.48766e-05	4.01557e-05	2.87739e-05	3.00588e-05	2.80316e-05	2.83009e-05	4.75097e-05	5.09151e-05	5.53714e-05	5.72906e-05	4.37619e-05	2.94986e-05	4.63564e-05	4.51882e-05	8.08302e-05	6.55516e-05	6.27486e-05	4.64448e-05	5.97897e-05	3.69013e-05	4.13417e-05	5.1469e-05
Acidobacteria_bacterium_OLB17	0.000375484	0.000356737	0.000332262	0.000399886	0.000414487	0.000511625	0.00048566	0.000396116	0.000489302	0.000442026	0.00052005	0.000516189	0.000509734	0.000410447	0.000558629	0.000453697	0.000321901	0.000342288	0.000273501	0.000304625	0.000396604	0.000401463	0.000470156	0.000533164
Acidobacteria_bacterium_Pan2503	0.000337423	0.000382443	0.00032179	0.000335875	0.00036891	0.000356247	0.000367148	0.000377277	0.000527539	0.000519016	0.000448694	0.000462249	0.000306662	0.00030283	0.000265118	0.00033919	0.000222741	0.000233381	0.0002179	0.000206196	0.000225399	0.000178792	0.000186035	0.000221095
Acidobacteria_bacterium_RBG_13_68_16	4.32988e-05	4.81363e-05	5.65985e-05	4.44663e-05	4.42663e-05	5.33049e-05	4.39398e-05	5.38093e-05	5.42089e-05	4.71548e-05	5.92353e-05	5.65533e-05	4.90271e-05	4.45165e-05	4.70937e-05	4.99814e-05	4.73293e-05	4.9661e-05	5.57269e-05	4.42761e-05	4.70283e-05	4.23787e-05	4.28294e-05	4.99332e-05
Acidobacteria_bacterium_RBG_16_64_8	1.62962e-05	1.47328e-05	2.30261e-05	2.20536e-05	1.63005e-05	1.64831e-05	1.71132e-05	1.81049e-05	1.69043e-05	1.55355e-05	1.80201e-05	1.88061e-05	1.7349e-05	1.54741e-05	2.26403e-05	2.12984e-05	1.49061e-05	1.73532e-05	1.32833e-05	1.56067e-05	2.32301e-05	1.88357e-05	1.85862e-05	2.73994e-05
Acidobacteria_bacterium_RBG_16_68_9	4.19366e-05	3.14466e-05	4.44999e-05	3.4737e-05	2.78959e-05	3.48912e-05	3.19196e-05	3.09295e-05	4.00779e-05	3.60593e-05	4.17135e-05	4.20481e-05	3.6658e-05	3.19578e-05	4.00814e-05	3.42607e-05	3.74636e-05	3.2186e-05	4.47135e-05	3.96808e-05	3.73959e-05	2.77454e-05	3.29292e-05	3.35794e-05
Acidobacteria_bacterium_RBG_16_70_10	6.43114e-05	5.55093e-05	6.32908e-05	6.26438e-05	5.51473e-05	4.74304e-05	4.26076e-05	4.73767e-05	6.67948e-05	7.11708e-05	9.52493e-05	7.61217e-05	6.91079e-05	5.46095e-05	7.24307e-05	7.16861e-05	9.28162e-05	8.54241e-05	8.30023e-05	7.10281e-05	8.28508e-05	6.83917e-05	6.9706e-05	8.44887e-05
Acidobacteria_bacterium_RIFCSPHIGHO2_01_FULL_67_28	1.61301e-05	2.01556e-05	1.64451e-05	1.46942e-05	1.62008e-05	1.72766e-05	1.64598e-05	1.46405e-05	1.12444e-05	1.29363e-05	9.46352e-06	1.11246e-05	1.05885e-05	1.12576e-05	1.12881e-05	1.41434e-05	9.29311e-06	6.54455e-06	8.76606e-06	6.47647e-06	1.33794e-05	1.07734e-05	1.21885e-05	1.21047e-05
Acidobacteria_bacterium_RIFCSPHIGHO2_02_FULL_67_57	1.37502e-05	2.02553e-05	1.50885e-05	1.42199e-05	1.93131e-05	1.77632e-05	2.08245e-05	1.76222e-05	1.51143e-05	1.42804e-05	1.57667e-05	1.18969e-05	1.16592e-05	1.0745e-05	1.21703e-05	1.43348e-05	9.82956e-06	9.81479e-06	1.41343e-05	1.06026e-05	1.25795e-05	1.14988e-05	8.57764e-06	8.69933e-06
Acidobacteria_bacterium_RIFCSPHIGHO2_12_FULL_67_30	1.62561e-05	2.01217e-05	1.71321e-05	1.80009e-05	1.98991e-05	2.08121e-05	2.06246e-05	1.77213e-05	1.07756e-05	1.01144e-05	1.25058e-05	1.34527e-05	1.39684e-05	1.34247e-05	1.14261e-05	1.0332e-05	1.2347e-05	9.60026e-06	1.24471e-05	9.79985e-06	1.30738e-05	1.12929e-05	1.59477e-05	1.32331e-05
Acidobacteria_bacterium_RIFCSPLOWO2_02_FULL_59_13	5.39314e-05	5.26703e-05	5.46512e-05	5.46976e-05	5.36133e-05	5.5471e-05	5.04363e-05	5.46931e-05	4.81363e-05	4.1012e-05	4.57473e-05	4.78591e-05	4.97849e-05	4.97361e-05	4.98227e-05	5.43391e-05	5.38286e-05	4.36567e-05	5.50488e-05	4.30869e-05	3.831e-05	3.60457e-05	3.9322e-05	3.90414e-05
Acidobacteria_bacterium_RIFCSPLOWO2_02_FULL_60_20	4.91123e-05	4.66395e-05	3.87595e-05	4.8425e-05	4.3337e-05	4.9359e-05	5.16159e-05	4.7802e-05	3.39371e-05	3.30005e-05	4.05992e-05	4.12531e-05	4.05883e-05	3.33396e-05	4.05563e-05	4.31959e-05	4.44336e-05	4.36843e-05	5.5657e-05	4.1596e-05	4.26578e-05	3.69947e-05	3.29472e-05	3.90971e-05
Acidobacteria_bacterium_RIFCSPLOWO2_02_FULL_61_28	9.52916e-05	8.57756e-05	7.83156e-05	8.74184e-05	7.47326e-05	8.3181e-05	7.45954e-05	8.91488e-05	8.05014e-05	7.60621e-05	9.21781e-05	7.90321e-05	6.89752e-05	6.8263e-05	7.79207e-05	7.93265e-05	8.79629e-05	8.31812e-05	9.60894e-05	7.17093e-05	8.01921e-05	6.147e-05	6.11411e-05	7.84461e-05
Acidobacteria_bacterium_RIFCSPLOWO2_02_FULL_64_15	0.000221525	0.000203021	0.000210535	0.000225505	0.000185527	0.000185277	0.000195092	0.000170965	0.000223996	0.000221036	0.000237869	0.000230735	0.000213931	0.000166215	0.000224491	0.000209974	0.000247702	0.000234287	0.000231	0.000222307	0.000234216	0.000186943	0.000191303	0.000222674
Acidobacteria_bacterium_RIFCSPLOWO2_02_FULL_65_29	0.00186166	0.00161582	0.00154741	0.0016474	0.00145284	0.00140148	0.00142978	0.00133292	0.00163361	0.00159539	0.00186958	0.00171293	0.00149204	0.00128178	0.00159008	0.00142818	0.00217454	0.00205254	0.00203616	0.00186964	0.00202132	0.00168398	0.00158755	0.00179966
Acidobacteria_bacterium_RIFCSPLOWO2_02_FULL_67_21	0.000526425	0.000320617	0.000436821	0.000471518	0.000283805	0.000294985	0.000357733	0.00027179	0.000608658	0.00057255	0.000630106	0.000602585	0.000536642	0.000422088	0.000592884	0.000535153	0.000816196	0.000817465	0.000890862	0.000703008	0.000636048	0.000469525	0.000511014	0.00055184
Acidobacteria_bacterium_RIFCSPLOWO2_02_FULL_67_36	0.000482341	0.000340474	0.00041288	0.000450328	0.000410524	0.000392211	0.000393904	0.000371554	0.000542962	0.00055612	0.000542516	0.000531063	0.000456173	0.000358517	0.000486184	0.000429324	0.000496319	0.000428497	0.000453615	0.000446571	0.000585444	0.000502841	0.00043101	0.000529924
Acidobacteria_bacterium_RIFCSPLOWO2_02_FULL_68_18	0.000155623	9.85403e-05	0.00012434	0.000129628	8.47623e-05	9.16785e-05	9.34978e-05	8.4324e-05	0.000158884	0.000157298	0.000174362	0.000168477	0.000145645	0.000112966	0.000157658	0.000142165	0.000223278	0.000222786	0.000254503	0.000197457	0.000181278	0.000141674	0.00014571	0.000164684
Acidobacteria_bacterium_RIFCSPLOWO2_12_FULL_54_10	3.84297e-05	4.45551e-05	3.43274e-05	3.35666e-05	3.97794e-05	3.73283e-05	3.75134e-05	3.92167e-05	2.49998e-05	2.82396e-05	3.334e-05	2.86308e-05	3.09387e-05	2.92072e-05	3.01075e-05	3.2968e-05	3.39058e-05	3.03868e-05	2.91909e-05	2.13221e-05	2.82364e-05	2.47917e-05	2.96202e-05	3.00329e-05
Acidobacteria_bacterium_RIFCSPLOWO2_12_FULL_59_11	4.9256e-05	4.10804e-05	4.13485e-05	4.70718e-05	4.14041e-05	4.11968e-05	4.67418e-05	3.9476e-05	5.1351e-05	4.4748e-05	4.94585e-05	4.79327e-05	4.46899e-05	3.58626e-05	4.6523e-05	4.52381e-05	5.06767e-05	3.96822e-05	4.89177e-05	4.54482e-05	5.81915e-05	4.74648e-05	3.83478e-05	5.04813e-05
Acidobacteria_bacterium_RIFCSPLOWO2_12_FULL_60_22	9.78668e-05	0.00011943	0.000100096	0.00011448	0.000119524	0.000101821	0.00010609	0.000105638	8.04742e-05	8.1326e-05	9.91817e-05	8.92041e-05	8.83841e-05	8.87207e-05	9.27882e-05	9.11381e-05	9.91946e-05	9.90571e-05	0.000102001	8.29902e-05	9.12157e-05	7.09202e-05	7.2014e-05	8.14039e-05
Acidobacteria_bacterium_RIFCSPLOWO2_12_FULL_65_11	0.000797701	0.000667837	0.000695984	0.000751938	0.000686911	0.000646087	0.000670211	0.000625178	0.000742616	0.000703914	0.000791294	0.000731447	0.000703524	0.000595279	0.000718306	0.000685871	0.000820073	0.000804825	0.000821356	0.000721543	0.000735477	0.000610514	0.000621931	0.000694971
Acidobacteria_bacterium_RIFCSPLOWO2_12_FULL_66_10	0.000328122	0.0002688	0.000288895	0.000285285	0.000248591	0.000239693	0.000248712	0.000230527	0.000303028	0.000315612	0.000318786	0.000307093	0.000268027	0.000224206	0.000300578	0.000247838	0.000340445	0.000331373	0.000349909	0.000311968	0.000302815	0.000252984	0.000243476	0.000288417
Acidobacteria_bacterium_RIFCSPLOWO2_12_FULL_66_21	0.00651906	0.00439011	0.00536113	0.00585749	0.00545476	0.00547758	0.00531473	0.00503495	0.00731992	0.00744443	0.00726266	0.00717093	0.00598386	0.00493201	0.00652319	0.00565548	0.0065375	0.00589907	0.00581118	0.00596307	0.0077775	0.00696624	0.006187	0.00718538
Acidobacteria_bacterium_RIFCSPLOWO2_12_FULL_67_14	0.00157284	0.00104138	0.00137761	0.00142712	0.000899589	0.000966734	0.00108605	0.000912214	0.00175971	0.00173312	0.00183635	0.00182299	0.00165254	0.0012695	0.00174073	0.00158193	0.00255679	0.00254174	0.00263439	0.00214102	0.00196292	0.00145111	0.00157673	0.00166717
Acidobacteria_bacterium_RIFCSPLOWO2_12_FULL_67_14b	0.00228122	0.0014043	0.0025578	0.0020637	0.00126515	0.00140934	0.00121881	0.00116654	0.00305566	0.0031689	0.00323331	0.00287941	0.00225751	0.00156464	0.00260209	0.00209146	0.00386059	0.00403914	0.00439661	0.00371938	0.00320448	0.00274292	0.00253745	0.00312639
Acidobacteria_bacterium_RIFCSPLOWO2_12_FULL_68_19	0.0018006	0.00117991	0.00154441	0.00161608	0.00103962	0.00107423	0.00122567	0.0010114	0.00205229	0.00201626	0.00217344	0.00213606	0.00186589	0.00146134	0.00200369	0.00180008	0.00297951	0.00300849	0.00312439	0.00252664	0.00233981	0.00174273	0.00185192	0.00196737
Acidobacteria_bacterium_SCGC_AG-212-P17	6.10767e-05	9.87013e-05	7.67248e-05	5.55651e-05	0.000106542	9.99325e-05	0.000133331	0.000111973	2.50835e-05	2.86619e-05	2.65564e-05	3.02968e-05	3.4569e-05	3.6166e-05	3.2708e-05	4.65121e-05	2.16566e-05	1.73285e-05	1.58155e-05	1.58924e-05	2.34939e-05	2.05756e-05	2.10451e-05	2.75306e-05
Acidobacteria_bacterium_SCN_69-37	0.00123147	0.000850016	0.00116364	0.00116438	0.000951249	0.000918834	0.000791425	0.000823068	0.00127245	0.00135588	0.00128411	0.00123688	0.0012332	0.00103564	0.00129993	0.00127827	0.00157333	0.00162085	0.00162287	0.00138298	0.00125899	0.000994703	0.000961535	0.00114272
Acidobacteriaceae_bacterium	0.000247147	0.000479927	0.000307521	0.000297713	0.000741058	0.000697008	0.000655683	0.00122269	0.000197359	0.000152015	0.000175898	0.000219696	0.000245919	0.000368958	0.000218727	0.000342421	0.000397632	0.000415351	0.000531534	0.000508222	0.000157932	0.000185203	0.000282624	0.000305746
Acidobacteriaceae_bacterium_KBS_146	5.78747e-05	0.000104334	7.78942e-05	7.69078e-05	0.000114913	0.000111786	0.000122137	0.000152397	2.7561e-05	3.17902e-05	2.89905e-05	3.12722e-05	6.53778e-05	3.97673e-05	4.13487e-05	5.23192e-05	2.53088e-05	2.49836e-05	2.64962e-05	2.07567e-05	2.24441e-05	1.81048e-05	2.76905e-05	2.29293e-05
Acidobacteriaceae_bacterium_KBS_83	0.000145558	0.000207809	0.000170576	0.000156816	0.000226814	0.000217667	0.000233457	0.000262508	8.32146e-05	8.41939e-05	8.09782e-05	8.39902e-05	0.000117371	0.000120645	0.000109675	0.00013425	6.7027e-05	5.44375e-05	6.08674e-05	5.61711e-05	7.6172e-05	6.76922e-05	6.95196e-05	6.72062e-05
Acidobacteriaceae_bacterium_KBS_89	0.000145053	0.000228899	0.000200114	0.000188836	0.000280313	0.000269909	0.000298655	0.00033412	6.654e-05	6.89203e-05	7.17741e-05	7.06807e-05	0.000100303	9.31984e-05	8.72988e-05	0.00012383	5.76963e-05	5.22793e-05	4.45725e-05	4.7402e-05	6.07664e-05	5.62407e-05	6.11211e-05	6.23836e-05
Acidobacteriaceae_bacterium_TAA_166	3.17089e-05	6.96376e-05	5.19968e-05	5.28043e-05	8.02691e-05	7.55952e-05	8.03522e-05	9.44064e-05	1.59195e-05	1.67663e-05	1.44679e-05	1.56054e-05	3.18503e-05	2.84471e-05	2.13644e-05	3.5382e-05	9.28969e-06	1.32909e-05	1.23222e-05	1.31277e-05	1.51144e-05	1.18522e-05	1.48478e-05	1.22838e-05
Acidobacteriaceae_bacterium_URHE0068	0.000251233	0.000521033	0.000306733	0.000250637	0.000439048	0.000542707	0.000457953	0.00076066	8.67403e-05	0.00010349	8.55227e-05	9.12757e-05	0.000251375	0.000257228	0.000224453	0.000342911	6.01207e-05	4.99055e-05	4.6713e-05	4.36876e-05	6.275e-05	5.45037e-05	5.71892e-05	6.101e-05
Acidobacteriales_bacterium	0.00146522	0.00184279	0.00137172	0.00123022	0.00169128	0.00159874	0.00160711	0.00162856	0.000595953	0.000651017	0.000504505	0.000583158	0.000698739	0.000793086	0.000746016	0.000889099	0.00032214	0.000238606	0.000242058	0.000262619	0.000439471	0.0003775	0.00063406	0.000528147
Acidobacteriales_bacterium_13_1_40CM_3_55_5	8.69878e-05	0.000108078	8.95115e-05	7.78447e-05	0.00012283	0.000121902	0.00012514	0.00011388	2.09875e-05	2.35425e-05	2.28399e-05	2.668e-05	3.57589e-05	3.59047e-05	3.25933e-05	4.84856e-05	1.28558e-05	9.31732e-06	1.30249e-05	8.74983e-06	1.64156e-05	1.18558e-05	1.67653e-05	1.7027e-05
Acidobacteriales_bacterium_13_2_20CM_2_55_5	4.46408e-05	6.37061e-05	4.35787e-05	4.17156e-05	5.80174e-05	6.5739e-05	6.69736e-05	6.74903e-05	1.46584e-05	1.57987e-05	1.00441e-05	1.24687e-05	2.08337e-05	1.93715e-05	1.98917e-05	2.35072e-05	6.34512e-06	4.06382e-06	3.93792e-06	3.55683e-06	9.91217e-06	6.47578e-06	8.65003e-06	9.33989e-06
Acidobacteriales_bacterium_13_2_20CM_55_8	0.000272075	0.000381701	0.000296757	0.000268658	0.000406734	0.000402556	0.000418468	0.000400124	8.78591e-05	0.000101092	8.39444e-05	9.32463e-05	0.000135907	0.0001386	0.000125181	0.00016953	4.29469e-05	3.42063e-05	3.63532e-05	3.78752e-05	5.84413e-05	4.18799e-05	5.76243e-05	5.47112e-05
Acidobacteriales_bacterium_59-55	0.000115429	0.000235576	0.000160718	0.000260321	0.000334918	0.000268159	0.000304822	0.000280327	5.07931e-05	5.98296e-05	5.09453e-05	5.17483e-05	9.9437e-05	8.11069e-05	6.97055e-05	0.000104695	3.03211e-05	2.87116e-05	3.44744e-05	2.97286e-05	3.54471e-05	3.13238e-05	3.20843e-05	3.48934e-05
Acidobacteriia_bacterium	0.00140698	0.00170144	0.00141867	0.00153594	0.00167092	0.00168575	0.00179154	0.00208381	0.000983734	0.00100351	0.00107778	0.00108222	0.00114038	0.00104078	0.00110691	0.00130291	0.000957847	0.000907519	0.000919776	0.000808938	0.000858356	0.000634196	0.000731527	0.000779194
Acidobacteriia_bacterium_12-62-4	2.70515e-05	3.2121e-05	2.53629e-05	3.32664e-05	2.85004e-05	2.91205e-05	3.25201e-05	2.98839e-05	2.5591e-05	2.45297e-05	2.96676e-05	2.57819e-05	2.45614e-05	2.06624e-05	2.55709e-05	2.52643e-05	2.61796e-05	2.42172e-05	2.44007e-05	1.74022e-05	1.91006e-05	1.27041e-05	1.41177e-05	2.54847e-05
Acidobacteriia_bacterium_AA117	0.000732601	0.0014053	0.000946915	0.000728462	0.00143977	0.00139908	0.00167646	0.00156015	0.000298747	0.000322429	0.000285027	0.000301228	0.000404588	0.000418964	0.00037911	0.000502068	0.000188944	0.00013303	0.000150195	0.000161523	0.000232451	0.000204593	0.000245446	0.000245414
Acidobacteriia_bacterium_SbA2	0.000112372	0.000170257	0.000116235	0.000136327	0.000154299	0.0001572	0.000161124	0.000149781	6.69723e-05	6.90088e-05	6.3416e-05	6.60463e-05	8.35196e-05	9.26896e-05	8.03612e-05	9.42938e-05	4.47282e-05	4.2259e-05	5.10331e-05	4.02913e-05	5.60717e-05	4.07051e-05	4.86809e-05	5.07863e-05
Acidobacterium_ailaaui	7.15361e-05	0.000101426	7.86379e-05	6.889e-05	0.000100039	0.000102723	9.40881e-05	0.000110717	2.70992e-05	3.65225e-05	3.11778e-05	3.30478e-05	5.16145e-05	5.00163e-05	4.36243e-05	5.51686e-05	2.30878e-05	2.08976e-05	1.8174e-05	1.6544e-05	2.56811e-05	2.36236e-05	2.40625e-05	2.5221e-05
Acidobacterium_capsulatum	2.23864e-05	4.20386e-05	2.86619e-05	2.69424e-05	3.67455e-05	4.01666e-05	3.66094e-05	4.75066e-05	1.2923e-05	1.35767e-05	1.09272e-05	1.17634e-05	2.14248e-05	2.18751e-05	1.70717e-05	2.11958e-05	1.09268e-05	8.74993e-06	9.44226e-06	7.28123e-06	9.07172e-06	8.50744e-06	9.69986e-06	9.31721e-06
Acidobacterium_sp.	0.000851868	0.000540683	0.00100109	0.000783715	0.000462521	0.000533162	0.000453884	0.000441301	0.00110731	0.00114559	0.00114688	0.00103414	0.000829689	0.000561862	0.000983621	0.000766082	0.00142776	0.00150078	0.00170681	0.00139063	0.00114676	0.000976426	0.000914869	0.00114817
Acidobacterium_sp._4Y35	0.000139669	0.000215127	0.000161976	0.000152319	0.00022256	0.000240972	0.000226777	0.000267794	7.87548e-05	7.59673e-05	7.29154e-05	7.60445e-05	0.000110335	0.000107833	9.87491e-05	0.000131503	6.1332e-05	5.79055e-05	5.90905e-05	4.99507e-05	5.86267e-05	5.48789e-05	5.966e-05	6.24655e-05
Acidobacterium_sp._S8	9.5116e-05	0.000138779	9.64189e-05	9.68555e-05	0.000135096	0.000140303	0.000138021	0.000162024	4.93184e-05	4.86383e-05	4.59429e-05	4.898e-05	7.23646e-05	6.9561e-05	6.39513e-05	8.84171e-05	3.44152e-05	3.9327e-05	4.07473e-05	3.7599e-05	4.31942e-05	3.40048e-05	3.80121e-05	4.17943e-05
Acidocella_aminolytica	3.72906e-06	5.53184e-06	4.30643e-06	5.79881e-06	5.18071e-06	2.59121e-06	3.44486e-06	5.27341e-06	4.44397e-06	2.74813e-06	2.74935e-06	2.60833e-06	3.21766e-06	4.63237e-06	2.0936e-06	4.33298e-06	4.04848e-06	4.26794e-06	2.40275e-06	5.22437e-06	2.81497e-06	3.0882e-06	3.65947e-06	3.05925e-06
Acidocella_aromatica	3.54154e-06	3.33942e-06	1.91358e-06	3.10146e-06	2.74711e-06	1.91214e-06	3.25421e-06	4.91403e-06	2.87167e-06	1.21646e-06	2.75912e-06	2.01145e-06	2.47843e-06	2.20579e-06	2.04522e-06	2.3482e-06	2.73426e-06	5.21067e-06	1.36762e-06	1.7676e-06	2.57018e-06	1.16944e-06	1.74091e-06	1.10772e-06
Acidocella_facilis	2.4339e-06	1.57582e-06	1.40287e-06	5.61721e-07	1.3939e-06	1.32574e-06	1.92181e-06	2.55407e-06	1.46687e-06	5.31753e-07	4.284e-07	7.77398e-07	6.62409e-07	6.46817e-07	9.06081e-07	6.26462e-07	1.29274e-06	1.41045e-07	2.91484e-07	6.74892e-08	1.32497e-06	1.42076e-06	3.97632e-07	2.31942e-06
Acidocella_sp.	2.43523e-06	2.3122e-06	1.96286e-06	2.46543e-06	3.10069e-06	2.89061e-06	5.08453e-06	3.82976e-06	2.75201e-06	3.53287e-06	1.87257e-06	3.30598e-06	2.37436e-06	1.89878e-06	2.09078e-06	3.08653e-06	3.8962e-06	2.50153e-06	1.53815e-06	2.43322e-06	1.88758e-06	2.22125e-06	3.62948e-06	3.18622e-06
Acidocella_sp._20-57-95	2.12696e-06	3.00563e-06	2.55826e-06	1.03111e-06	3.01425e-06	2.88486e-06	3.268e-06	2.58433e-06	2.16617e-06	1.54021e-06	1.82795e-06	1.13835e-06	2.86942e-06	1.89951e-06	1.80943e-06	2.067e-06	3.12297e-06	2.52273e-06	3.06624e-06	1.96055e-06	2.60487e-06	5.13138e-07	1.77363e-06	1.21988e-06
Acidocella_sp._20-58-15	6.42651e-07	2.66009e-06	7.5387e-07	2.50044e-06	2.39365e-06	3.72519e-06	1.96701e-06	4.02436e-06	2.15254e-06	8.70807e-07	6.16874e-07	1.42951e-06	1.35129e-06	1.80104e-06	1.05467e-06	1.14188e-06	2.07371e-06	1.96909e-06	8.51296e-07	7.93079e-07	1.61711e-06	6.17358e-07	1.821e-06	8.98491e-07
Acidocella_sp._20-61-6	1.65442e-06	1.53886e-06	1.32859e-06	1.27942e-06	2.26614e-06	2.5158e-06	7.67891e-07	1.5259e-06	1.20924e-06	1.8775e-06	2.03748e-06	8.92527e-07	1.79559e-06	1.25974e-06	9.64953e-07	1.29318e-06	6.29718e-07	1.99264e-06	6.19372e-07	5.90352e-07	1.27131e-06	8.15018e-07	1.15462e-06	5.63362e-07
Acidocella_sp._20-63-7	6.61431e-07	1.78793e-06	7.3359e-07	1.22693e-06	8.51509e-07	2.0994e-06	7.4976e-07	2.20674e-06	1.08406e-06	9.447e-07	7.46988e-07	9.20269e-07	1.51163e-06	1.39702e-06	1.08057e-06	2.28919e-06	8.77425e-08	8.96e-07	5.5765e-07	4.0234e-07	2.8079e-07	8.71248e-07	9.66941e-07	8.34772e-07
Acidocella_sp._21-58-7	2.95772e-06	3.36745e-06	4.86669e-06	2.58346e-06	3.12837e-06	4.81417e-06	2.51316e-06	5.62766e-06	2.71104e-06	2.15349e-06	4.40909e-06	3.12511e-06	4.39203e-06	2.80982e-06	3.01194e-06	3.1335e-06	2.73675e-06	2.95637e-06	2.06132e-06	2.96057e-06	1.86892e-06	1.64926e-06	1.0061e-06	2.19331e-06
Acidocella_sp._35-58-6	4.35743e-07	1.63903e-06	2.6297e-07	2.88249e-07	1.78771e-06	1.55708e-06	9.71305e-07	3.96226e-07	6.0705e-07	5.38593e-07	7.72878e-07	9.17865e-08	1.08023e-06	8.17594e-07	3.53965e-07	2.95218e-07	1.32835e-07	4.9059e-07	9.77662e-07	8.469e-07	4.30136e-07	6.4377e-07	1.10611e-06	2.15217e-07
Acidocella_sp._MX-AZ02	1.01028e-06	2.08554e-06	2.2931e-06	2.10717e-06	2.4834e-06	2.3612e-06	2.81189e-06	3.59966e-06	1.44037e-06	2.03493e-06	1.548e-06	2.13755e-06	1.87072e-06	1.9664e-06	1.97109e-06	1.63837e-06	3.03111e-06	1.70523e-06	2.05988e-06	1.01782e-06	1.08456e-06	3.24744e-06	2.64048e-06	2.55302e-06
Acidomonas_methanolica	3.79337e-06	3.64515e-06	1.86541e-06	2.75146e-06	3.20527e-06	2.64756e-06	4.3159e-06	2.37575e-06	1.48405e-06	2.22975e-06	1.89138e-06	2.05744e-06	2.26204e-06	2.36227e-06	1.96617e-06	2.38313e-06	1.89503e-06	2.75086e-06	3.42068e-06	1.4118e-06	1.80741e-06	2.95928e-06	1.40718e-06	1.60728e-06
Acidomyces_sp._richmondensis	0	1.74903e-07	0	1.0098e-06	0	0	0	6.35819e-08	1.05468e-07	1.06764e-07	5.21941e-07	2.38896e-07	4.79732e-08	4.43996e-07	1.07207e-07	3.9977e-07	1.41151e-07	0	0	8.68663e-07	1.27896e-07	7.26495e-07	6.18258e-07	6.57572e-08
Acidothermales_bacterium	2.55109e-05	3.88333e-05	3.39143e-05	3.50822e-05	8.3659e-05	7.89682e-05	9.32501e-05	7.70566e-05	2.41521e-05	2.74332e-05	2.68291e-05	2.36904e-05	2.59651e-05	3.24676e-05	2.80119e-05	2.97147e-05	2.17283e-05	1.99544e-05	1.61397e-05	1.29331e-05	1.9166e-05	1.71239e-05	2.15063e-05	1.89599e-05
Acidothermus_cellulolyticus	4.04894e-05	7.6432e-05	4.76035e-05	7.02692e-05	0.000151801	0.000157981	0.000170967	0.000157807	3.85283e-05	4.47608e-05	3.19084e-05	3.39094e-05	4.12932e-05	6.25566e-05	4.75915e-05	4.95871e-05	2.62668e-05	2.77948e-05	2.48138e-05	2.24783e-05	2.81396e-05	2.58982e-05	2.50458e-05	2.48077e-05
Acidovorax_anthurii	1.14427e-05	7.20047e-06	8.75982e-06	1.16758e-05	6.8872e-06	6.69572e-06	9.86083e-06	9.02059e-06	1.99618e-05	8.55148e-06	9.11237e-06	9.4252e-06	5.93986e-06	6.13746e-06	8.1744e-06	6.23415e-06	1.2313e-05	1.57019e-05	1.63144e-05	1.27017e-05	9.04398e-06	6.35177e-06	7.76616e-06	1.08292e-05
Acidovorax_avenae	1.77002e-05	1.93219e-05	2.0978e-05	1.57931e-05	1.45459e-05	1.38387e-05	1.52426e-05	1.39003e-05	2.78348e-05	1.3272e-05	1.53626e-05	1.511e-05	1.56822e-05	1.1115e-05	1.414e-05	1.2492e-05	1.32707e-05	1.76898e-05	2.25839e-05	1.75998e-05	1.5748e-05	1.08661e-05	1.06457e-05	1.69933e-05
Acidovorax_caeni	2.68987e-06	5.43078e-06	3.62534e-06	1.77099e-06	2.56789e-06	3.03161e-06	1.77748e-06	4.74194e-06	8.3788e-06	2.00805e-06	3.18623e-06	2.60403e-06	2.71017e-06	2.37786e-06	3.10557e-06	1.95117e-06	2.49029e-06	4.66294e-06	2.34634e-06	3.34751e-06	2.22646e-06	1.83934e-06	1.55959e-06	2.91259e-06
Acidovorax_carolinensis	6.57548e-06	5.41027e-06	7.15409e-06	3.39269e-06	4.57709e-06	5.67596e-06	5.49173e-06	5.50781e-06	8.34125e-06	4.34472e-06	4.06886e-06	3.95039e-06	2.87122e-06	3.28489e-06	3.62934e-06	5.1688e-06	5.31008e-06	6.64106e-06	4.71573e-06	9.21888e-06	4.42453e-06	5.61622e-06	3.31558e-06	6.09516e-06
Acidovorax_cattleyae	5.92584e-06	5.81339e-06	4.28076e-06	4.67054e-06	4.30185e-06	5.82888e-06	5.38847e-06	5.52851e-06	4.37416e-06	2.56154e-06	4.25245e-06	3.6658e-06	2.37767e-06	2.80525e-06	3.27961e-06	2.64525e-06	3.17369e-06	5.29449e-06	4.85438e-06	4.19731e-06	4.96204e-06	3.80244e-06	4.20194e-06	3.58507e-06
Acidovorax_cavernicola	1.47976e-05	2.05716e-05	1.33901e-05	9.38374e-06	1.20533e-05	1.39396e-05	1.48197e-05	2.42207e-05	3.13167e-05	9.34736e-06	1.01754e-05	1.41647e-05	9.31573e-06	9.74072e-06	7.96393e-06	7.7408e-06	1.08204e-05	1.36888e-05	1.21607e-05	1.00217e-05	7.87964e-06	1.3143e-05	1.51259e-05	1.77766e-05
Acidovorax_citrulli	7.11153e-06	6.62591e-06	7.418e-06	6.70766e-06	6.42898e-06	7.36885e-06	5.07564e-06	9.40164e-06	1.07327e-05	3.45621e-06	4.53602e-06	4.22374e-06	4.72799e-06	5.29474e-06	4.95289e-06	4.66207e-06	7.13251e-06	1.1025e-05	8.81997e-06	8.11079e-06	6.40793e-06	4.67857e-06	5.86811e-06	6.55194e-06
Acidovorax_delafieldii	1.18282e-05	1.90742e-05	1.22299e-05	1.04162e-05	8.88119e-06	1.18629e-05	1.13895e-05	1.55685e-05	2.42652e-05	7.29649e-06	7.79803e-06	9.40398e-06	5.69408e-06	6.11686e-06	7.99665e-06	8.88264e-06	8.33756e-06	9.78542e-06	7.65444e-06	9.41442e-06	1.14931e-05	8.62979e-06	8.73886e-06	1.00129e-05
Acidovorax_ebreus	1.92726e-06	1.79822e-06	7.50634e-07	7.73493e-07	9.23754e-07	1.13751e-06	1.09215e-06	7.3035e-07	1.32682e-06	9.56107e-07	1.07578e-06	1.48758e-06	5.46349e-07	6.02521e-07	7.08329e-07	5.17483e-07	6.05383e-07	2.75578e-07	5.69634e-07	2.65886e-06	1.2338e-06	4.27215e-07	1.2196e-06	7.34619e-07
Acidovorax_facilis	2.51456e-06	5.6207e-06	4.85351e-06	1.82845e-06	1.93362e-06	3.47473e-06	1.36331e-06	9.4141e-07	6.33888e-06	1.89856e-06	2.39204e-06	3.26353e-06	3.06164e-06	1.06509e-06	1.36897e-06	1.18442e-06	3.60371e-06	3.16719e-06	3.67856e-06	2.38608e-06	2.78185e-06	4.78493e-06	3.54251e-06	4.07295e-06
Acidovorax_kalamii	3.11861e-06	4.52596e-06	6.66006e-06	3.49099e-06	2.93732e-06	3.93647e-06	2.47655e-06	5.45076e-06	4.93868e-06	1.52392e-06	2.83971e-06	1.44628e-06	2.77532e-06	2.38248e-06	1.34503e-06	2.27855e-06	1.8244e-06	2.56363e-06	2.88246e-06	2.66346e-06	2.25962e-06	2.81275e-06	3.45773e-06	3.74884e-06
Acidovorax_konjaci	1.46863e-05	1.43624e-05	1.20323e-05	1.07321e-05	8.85693e-06	9.72324e-06	1.02344e-05	1.22272e-05	2.72756e-05	7.83961e-06	1.03516e-05	1.02607e-05	8.09193e-06	9.53122e-06	1.16429e-05	9.32068e-06	1.10207e-05	1.71182e-05	2.0775e-05	1.42986e-05	1.02417e-05	6.87489e-06	1.15289e-05	9.26566e-06
Acidovorax_oryzae	5.51615e-06	3.83033e-06	2.84345e-06	3.22506e-06	5.6374e-06	2.72477e-06	4.0222e-06	4.0418e-06	1.03858e-05	3.63303e-06	4.24923e-06	3.73628e-06	3.07094e-06	2.74944e-06	3.86987e-06	6.13955e-06	4.07647e-06	3.53007e-06	3.54952e-06	4.77921e-06	3.48383e-06	9.7692e-07	2.37852e-06	5.14848e-06
Acidovorax_radicis	1.29059e-05	1.12524e-05	1.49602e-05	8.2637e-06	1.10384e-05	9.47048e-06	7.41579e-06	7.63114e-06	2.29621e-05	1.16682e-05	1.0918e-05	8.67071e-06	1.0792e-05	9.28186e-06	1.34487e-05	1.02411e-05	7.93964e-06	1.07287e-05	9.12244e-06	9.06686e-06	1.12036e-05	8.76611e-06	1.20411e-05	8.70232e-06
Acidovorax_soli	1.80521e-05	1.81783e-05	1.79952e-05	1.32983e-05	1.39083e-05	1.24662e-05	1.15623e-05	1.3841e-05	3.58443e-05	1.4563e-05	1.79728e-05	1.59228e-05	1.39146e-05	1.11625e-05	1.31633e-05	1.46269e-05	1.42819e-05	2.28474e-05	1.6541e-05	1.47953e-05	1.32803e-05	1.43035e-05	1.51563e-05	1.84658e-05
Acidovorax_sp.	1.1712e-05	1.10863e-05	9.68671e-06	1.10512e-05	8.51923e-06	1.04702e-05	9.03624e-06	1.00778e-05	2.45829e-05	7.8925e-06	9.742e-06	8.57137e-06	1.10196e-05	9.03481e-06	1.17428e-05	8.13591e-06	1.25721e-05	1.0235e-05	9.88171e-06	1.2647e-05	8.64656e-06	8.80956e-06	7.06819e-06	1.11972e-05
Acidovorax_sp._100	1.56882e-06	2.30493e-06	1.73351e-06	1.4008e-06	8.53604e-07	1.77762e-06	5.53992e-07	1.35008e-06	6.74719e-06	1.87389e-06	1.23789e-06	1.11299e-06	1.61906e-06	1.4467e-06	2.68224e-06	1.1593e-06	1.87466e-06	1.72848e-06	2.55542e-06	1.24432e-06	1.30811e-06	6.85969e-07	1.24279e-06	2.21641e-06
Acidovorax_sp._106	2.93705e-06	3.4001e-06	1.43467e-06	2.59868e-06	1.54685e-06	1.76507e-06	7.72323e-07	2.04981e-06	5.32947e-06	1.97109e-06	3.15322e-06	3.11526e-06	2.22415e-06	1.63635e-06	1.76489e-06	2.22205e-06	2.35228e-06	2.15548e-06	1.70776e-06	3.52384e-06	2.41753e-06	1.83189e-06	1.54356e-06	3.52126e-06
Acidovorax_sp._107	4.50987e-06	4.70825e-06	2.24397e-06	2.31658e-06	2.0379e-06	1.39824e-06	1.5153e-06	2.19266e-06	5.71032e-06	1.42982e-06	1.58452e-06	2.22633e-06	1.98341e-06	2.87658e-06	7.59099e-07	1.43724e-06	1.65371e-06	1.56363e-06	1.10887e-06	2.85704e-06	3.3267e-06	1.27977e-06	6.51092e-07	2.72859e-06
Acidovorax_sp._16-35-5	5.88628e-06	5.07801e-06	6.46266e-06	5.51042e-06	4.52306e-06	5.33559e-06	5.40484e-06	7.21247e-06	9.03325e-06	7.28406e-06	3.57686e-06	5.9021e-06	3.99625e-06	2.07772e-06	3.6244e-06	3.80325e-06	4.02038e-06	7.34374e-06	4.79708e-06	2.79266e-06	4.84831e-06	4.30476e-06	4.1711e-06	4.55442e-06
Acidovorax_sp._16-64-162	0	0	3.217e-07	1.81918e-07	0	0	0	0	0	0	1.55392e-07	0	7.30885e-08	0	2.91346e-07	0	0	1.72268e-07	0	0	0	0	0	0
Acidovorax_sp._1608163	3.16883e-06	4.04677e-06	3.6489e-06	4.14661e-06	5.22705e-06	1.69459e-06	5.31768e-06	3.76312e-06	3.75214e-06	1.90873e-06	2.35607e-06	2.20057e-06	2.5848e-06	1.18366e-06	1.67951e-06	2.38743e-06	1.74677e-06	2.84715e-06	1.47835e-06	5.82465e-06	2.30355e-06	1.4663e-06	2.13771e-06	1.21933e-06
Acidovorax_sp._17-64-282	0	1.01129e-07	6.84058e-08	9.86234e-07	1.69053e-07	8.17797e-07	2.88131e-07	2.42022e-07	3.38682e-07	4.02137e-07	4.87614e-07	0	2.55724e-07	5.95775e-08	1.18463e-06	6.86131e-07	2.68057e-07	0	5.13388e-07	2.27387e-06	0	0	4.53125e-07	0
Acidovorax_sp._210-6	3.66769e-06	7.02215e-06	4.05634e-06	4.06485e-06	3.11996e-06	3.17378e-06	3.10934e-06	3.43095e-06	1.26931e-05	3.71384e-06	3.42514e-06	4.00695e-06	3.1819e-06	1.98878e-06	5.17764e-06	2.62612e-06	3.70952e-06	3.66745e-06	2.00074e-06	2.62457e-06	5.21815e-06	3.70752e-06	2.38903e-06	4.4243e-06
Acidovorax_sp._24-64-9	0	1.0379e-07	6.21353e-08	1.98594e-07	0	0	5.77966e-07	0	0	1.29896e-07	0	2.90657e-07	5.83674e-08	5.65986e-08	0	4.30207e-07	8.11618e-08	0	1.88242e-07	3.48694e-07	1.4708e-07	6.96224e-08	7.21301e-08	3.20018e-07
Acidovorax_sp._28-64-14	5.74954e-07	5.55999e-07	1.63024e-07	2.42662e-07	2.61747e-08	2.96845e-08	2.3753e-07	0	6.03996e-07	4.25659e-07	1.09474e-06	5.73163e-07	8.01262e-07	5.25469e-07	3.22971e-07	4.08936e-07	1.47481e-06	1.8201e-06	2.52448e-06	9.40975e-07	1.68784e-06	2.05872e-07	4.66072e-07	7.02793e-07
Acidovorax_sp._30	1.26251e-06	2.15246e-06	2.84377e-06	1.36605e-06	1.34392e-06	8.61324e-07	9.10352e-07	1.2002e-06	2.06121e-06	6.24252e-07	1.11707e-06	7.98098e-07	9.11856e-07	7.87076e-07	8.31472e-07	3.51822e-07	1.75528e-06	6.22982e-07	1.06338e-06	1.29584e-06	5.15913e-07	6.15355e-07	6.89697e-07	1.84044e-06
Acidovorax_sp._32-64-7	5.95249e-07	7.96049e-07	1.02603e-06	0	6.3197e-07	5.60085e-07	1.16379e-07	7.81528e-08	6.25945e-08	3.06416e-07	0	3.07344e-07	0	3.04112e-07	1.07262e-07	2.27994e-07	0	0	0	0	0	0	3.51854e-07	7.80532e-08
Acidovorax_sp._35-64-16	0	3.33297e-07	0	0	0	0	0	0	1.08438e-07	2.19542e-07	0	0	5.91895e-07	0	0	0	0	3.17847e-07	3.18156e-07	1.47336e-07	0	0	0	0
Acidovorax_sp._39-64-12	3.09516e-06	3.11812e-06	2.45129e-06	2.71087e-06	1.5345e-06	2.24412e-06	1.1099e-06	4.14915e-06	8.14282e-06	1.95474e-06	2.84143e-06	3.24927e-06	1.48574e-06	3.10977e-06	2.78521e-06	2.50544e-06	3.72101e-06	3.93895e-06	4.31769e-06	2.98253e-06	2.65499e-06	9.16517e-07	2.38446e-06	3.53e-06
Acidovorax_sp._56	2.58254e-06	3.1891e-06	3.29953e-06	1.25372e-06	1.6997e-06	1.44089e-06	1.69971e-06	1.22872e-06	5.1208e-06	1.00118e-06	1.79976e-06	1.30626e-06	1.68723e-06	1.46072e-06	1.67848e-06	1.81283e-06	2.85516e-06	3.42242e-06	1.61076e-06	2.69268e-06	2.35351e-06	5.96795e-07	1.50193e-06	1.6119e-06
Acidovorax_sp._59	0	0	0	0	0	0	0	0	0	0	0	0	0	0	2.53642e-07	1.79405e-07	0	0	0	8.94769e-07	2.17004e-07	6.84811e-08	0	0
Acidovorax_sp._62	2.93603e-06	2.06615e-06	2.15706e-06	3.69e-06	9.73119e-07	3.19734e-06	1.86616e-06	2.46795e-06	6.185e-06	1.67448e-06	1.58705e-06	2.26622e-06	2.37712e-06	2.86833e-06	2.26537e-06	1.90466e-06	1.7959e-06	3.09393e-06	4.6938e-06	4.2597e-06	2.68875e-06	1.53999e-06	1.53856e-06	1.02176e-06
Acidovorax_sp._65-7	1.46972e-06	1.02508e-06	1.35551e-06	8.33962e-07	6.37624e-07	9.2092e-07	8.38345e-07	2.19436e-06	3.81321e-06	3.71741e-07	6.97356e-07	7.96987e-07	2.18587e-06	8.12702e-07	5.76737e-07	5.22388e-07	8.6376e-07	3.67963e-07	3.18409e-07	7.79974e-07	2.95356e-07	1.23993e-06	8.34785e-07	1.29737e-07
Acidovorax_sp._69	4.35403e-06	2.39537e-06	4.17287e-06	2.02717e-06	2.63968e-06	4.75318e-06	2.34857e-06	4.54031e-06	2.00632e-06	2.02984e-06	2.2185e-06	2.12154e-06	1.6031e-06	1.66703e-06	1.37056e-06	1.16715e-06	3.22954e-06	3.07423e-06	3.5726e-06	2.98016e-06	2.66258e-06	3.80453e-06	1.70925e-06	2.58143e-06
Acidovorax_sp._93	8.37742e-07	2.08601e-06	4.9606e-07	1.51485e-06	1.21471e-06	2.53646e-06	1.31595e-06	1.39442e-06	1.90457e-06	2.37094e-06	6.45216e-07	1.20285e-06	9.55205e-07	1.31182e-06	3.37997e-07	7.7694e-07	1.7861e-06	1.72873e-06	1.42464e-06	1.77437e-06	1.17929e-06	6.24881e-07	1.5882e-06	1.03973e-06
Acidovorax_sp._94	2.37767e-06	2.29353e-06	1.44845e-06	1.64399e-06	1.73685e-06	1.71814e-06	2.21063e-06	1.20447e-06	2.11116e-06	6.48253e-07	2.69164e-07	7.04061e-07	6.38493e-07	8.97251e-07	1.49337e-06	1.05693e-06	6.7311e-07	1.1932e-06	4.16144e-07	1.82366e-06	1.538e-06	1.49747e-06	2.60882e-07	1.29465e-06
Acidovorax_sp._99	2.11688e-06	1.15081e-06	1.68893e-06	5.8853e-07	5.7575e-07	1.05287e-06	1.21949e-06	1.09692e-06	3.83349e-06	9.16778e-07	7.34895e-07	2.00521e-06	2.00596e-07	1.7526e-06	8.51776e-07	1.65778e-06	2.57122e-06	1.35042e-06	1.43769e-06	2.45918e-06	8.48418e-07	1.79975e-06	1.69623e-06	7.90018e-07
Acidovorax_sp._BoFeN1	1.40297e-06	2.66992e-06	2.53255e-06	1.47529e-06	1.34446e-06	1.35873e-06	1.46875e-06	1.20494e-06	5.2772e-06	9.18156e-07	1.73321e-06	1.11941e-06	9.05329e-07	1.02776e-06	1.11353e-06	8.36899e-07	2.16372e-06	1.96122e-06	2.03365e-06	2.27243e-06	1.546e-06	1.26235e-06	1.41432e-07	1.61748e-06
Acidovorax_sp._CCH12-A4	3.18954e-06	1.91066e-06	1.16764e-06	1.98415e-06	1.10116e-06	1.07499e-06	8.36858e-07	1.70536e-06	4.13027e-06	8.94616e-07	2.33473e-06	1.46416e-06	1.8809e-06	6.1309e-07	1.33992e-06	4.15294e-07	3.41354e-06	1.6631e-06	1.37156e-06	2.51046e-06	2.10484e-06	2.47448e-06	3.36517e-06	2.11863e-06
Acidovorax_sp._CF301	6.35444e-06	7.35664e-06	7.66607e-06	4.74447e-06	4.66319e-06	5.89381e-06	5.18071e-06	3.74053e-06	1.12546e-05	6.39403e-06	5.49864e-06	6.71904e-06	5.16796e-06	4.58694e-06	5.48461e-06	4.24721e-06	1.17812e-05	1.24656e-05	7.26907e-06	8.64209e-06	5.70719e-06	5.76902e-06	6.30029e-06	8.77483e-06
Acidovorax_sp._CF316	0	7.88803e-08	1.49125e-07	2.23768e-07	0	0	0	0	1.14045e-06	0	0	0	2.77305e-07	6.79184e-08	0	2.18874e-07	9.73942e-08	0	0	8.36867e-07	9.00492e-08	0	0	4.05657e-07
Acidovorax_sp._FJL06	3.23081e-06	3.98433e-06	3.58385e-06	3.70262e-06	2.17451e-06	2.36469e-06	2.53208e-06	2.59794e-06	1.2559e-05	3.10458e-06	5.93636e-06	4.29245e-06	2.40124e-06	1.73938e-06	2.60888e-06	1.90929e-06	2.2842e-06	3.64519e-06	2.46103e-06	2.79827e-06	1.52437e-06	1.28552e-06	2.04572e-06	3.66735e-06
Acidovorax_sp._GW101-3H11	4.66683e-06	2.35685e-06	2.72402e-06	3.41574e-06	2.98567e-06	2.17866e-06	2.03142e-06	1.98147e-06	9.92972e-06	2.56141e-06	2.98628e-06	3.0226e-06	1.98337e-06	2.04488e-06	2.29088e-06	2.79132e-06	3.16144e-06	3.60355e-06	4.51077e-06	5.2401e-06	2.35244e-06	1.87535e-06	2.5838e-06	3.49962e-06
Acidovorax_sp._HDW3	4.60295e-06	3.0756e-06	2.72217e-06	3.01826e-06	3.73484e-06	1.90261e-06	3.31342e-06	2.39329e-06	5.51807e-06	1.84656e-06	3.63343e-06	3.67151e-06	3.71428e-06	2.1412e-06	3.14017e-06	1.801e-06	2.09809e-06	2.77024e-06	2.91185e-06	3.07764e-06	4.23658e-06	3.18644e-06	2.27114e-06	3.16342e-06
Acidovorax_sp._HMWF018	1.36687e-06	3.02493e-06	9.84793e-07	1.31947e-06	1.91921e-06	2.97886e-06	1.00742e-06	2.91115e-06	1.64438e-06	2.66724e-06	1.61536e-06	9.8299e-07	2.30099e-06	1.29047e-06	8.88323e-07	1.04833e-06	2.02276e-06	1.93792e-06	2.48192e-06	1.44338e-06	2.24559e-06	1.43752e-06	1.32184e-06	1.95679e-06
Acidovorax_sp._HMWF029	3.23748e-06	9.18114e-07	8.22607e-07	1.51137e-06	7.75315e-07	2.10859e-06	1.07082e-06	1.56879e-06	7.49955e-06	2.26622e-06	1.46931e-06	2.49787e-06	1.28114e-06	1.828e-06	1.3923e-06	1.37848e-06	2.26221e-06	1.99217e-06	1.33463e-06	2.23092e-06	2.54866e-06	1.21487e-06	1.17957e-06	9.33317e-07
Acidovorax_sp._JHL-3	1.90221e-06	2.38221e-06	2.83702e-06	1.85791e-06	3.70997e-06	1.27911e-06	1.91895e-06	3.80754e-06	3.23499e-06	5.99443e-07	3.37174e-06	5.41618e-07	6.92973e-07	2.34904e-06	2.57958e-06	2.07156e-06	1.34628e-06	2.79456e-06	1.41236e-06	1.41553e-06	1.17453e-06	1.97655e-06	1.91663e-06	8.59785e-07
Acidovorax_sp._JHL-9	4.33785e-06	6.07819e-06	3.66818e-06	2.96736e-06	4.80226e-06	6.26493e-06	4.1975e-06	4.56613e-06	8.47025e-06	5.16235e-06	5.33341e-06	3.80434e-06	2.48743e-06	1.21504e-06	3.75744e-06	2.69723e-06	2.71915e-06	4.88593e-06	3.66785e-06	3.52895e-06	4.79336e-06	2.90225e-06	3.58949e-06	4.22987e-06
Acidovorax_sp._JMULE5	2.54732e-06	1.86303e-06	2.20236e-06	1.28748e-06	1.37361e-06	2.32263e-06	8.91385e-07	1.6982e-06	4.42163e-06	3.17155e-06	1.5595e-06	2.76388e-06	9.11272e-07	1.57766e-06	1.22347e-06	2.15764e-06	1.97868e-06	1.61934e-06	1.42352e-06	7.30441e-07	2.55227e-06	1.56283e-06	1.4701e-06	2.28768e-06
Acidovorax_sp._JS42	1.74594e-06	3.21349e-06	1.92619e-06	2.25286e-06	1.63722e-06	2.44833e-06	9.43372e-07	2.37276e-06	2.32524e-06	8.38165e-07	3.18028e-06	1.22797e-06	1.85705e-06	1.39131e-06	1.94667e-06	1.76136e-06	3.31772e-06	2.20418e-06	1.66099e-06	1.42091e-06	1.60648e-06	1.39989e-06	1.57135e-06	2.16365e-06
Acidovorax_sp._KKS102	1.59029e-06	1.11105e-06	2.60037e-06	1.17888e-06	2.35403e-06	3.72082e-06	2.54418e-06	2.76201e-06	3.62228e-06	5.85311e-07	1.93797e-06	8.97045e-07	1.16035e-06	5.0556e-07	7.78043e-07	2.29265e-07	8.74264e-07	4.12101e-06	2.1815e-06	1.35355e-06	1.55519e-06	6.50408e-07	1.93182e-06	1.26598e-06
Acidovorax_sp._Leaf160	4.70739e-06	5.27016e-06	6.97328e-06	4.85346e-06	5.55957e-06	5.23972e-06	6.74107e-06	4.23716e-06	1.30739e-05	6.13639e-06	3.70037e-06	6.48192e-06	4.40188e-06	2.85617e-06	4.88242e-06	3.13814e-06	5.65994e-06	6.65375e-06	8.79122e-06	6.76785e-06	5.38811e-06	4.39062e-06	4.02497e-06	4.33244e-06
Acidovorax_sp._Leaf191	7.19868e-06	5.95556e-06	5.75142e-06	6.89408e-06	4.83906e-06	4.61023e-06	5.8832e-06	4.89417e-06	7.58661e-06	4.5089e-06	5.61545e-06	5.49153e-06	4.84689e-06	5.5747e-06	4.83699e-06	5.08825e-06	6.07366e-06	4.62875e-06	5.29917e-06	4.15437e-06	4.4303e-06	3.82654e-06	6.49563e-06	7.30103e-06
Acidovorax_sp._Leaf76	1.23101e-07	0	0	0	0	0	0	0	0	0	0	0	0	0	0	4.11032e-07	0	0	0	0	0	0	0	0
Acidovorax_sp._Leaf78	5.09633e-06	5.44351e-06	4.20497e-06	5.16371e-06	4.38488e-06	4.53225e-06	2.8961e-06	6.51676e-06	7.33132e-06	7.27973e-06	6.06591e-06	5.85138e-06	3.38567e-06	1.88027e-06	2.591e-06	3.57605e-06	2.47308e-06	2.07815e-06	4.81693e-06	3.70392e-06	4.15621e-06	3.43775e-06	3.29224e-06	2.34086e-06
Acidovorax_sp._Leaf84	6.52252e-07	4.27855e-07	2.22574e-07	0	4.66124e-07	3.17176e-07	6.1312e-07	9.98617e-07	5.92241e-07	0	0	2.49135e-07	0	0	0	2.60565e-07	1.50845e-07	0	0	0	2.10115e-07	0	2.51002e-07	0
Acidovorax_sp._MR-S7	1.08566e-05	8.29017e-06	8.59147e-06	6.25111e-06	8.57084e-06	8.95991e-06	8.75911e-06	7.53629e-06	1.72838e-05	7.77334e-06	7.26301e-06	7.35708e-06	8.66653e-06	5.50344e-06	6.7922e-06	4.59349e-06	1.19433e-05	1.22369e-05	8.58669e-06	8.9424e-06	7.52123e-06	9.40833e-06	7.97209e-06	7.90683e-06
Acidovorax_sp._NB1	5.29585e-06	5.55822e-06	4.20285e-06	3.95645e-06	3.80794e-06	3.62122e-06	4.50305e-06	6.03732e-06	7.25209e-06	4.2502e-06	5.16568e-06	2.6462e-06	3.73476e-06	3.06098e-06	2.9641e-06	5.20029e-06	5.81442e-06	2.76203e-06	2.46617e-06	4.21233e-06	2.45276e-06	5.06803e-06	3.96814e-06	4.41773e-06
Acidovorax_sp._RAC01	5.41647e-06	3.98246e-06	3.89008e-06	3.95245e-06	1.96959e-06	2.46808e-06	2.39895e-06	1.52524e-06	1.33477e-05	2.10173e-06	3.32694e-06	2.90843e-06	3.37934e-06	2.29404e-06	3.15621e-06	2.41105e-06	6.64552e-06	4.75271e-06	4.38217e-06	2.25886e-06	3.44178e-06	1.1895e-06	4.72694e-06	5.8429e-06
Acidovorax_sp._Root217	5.77621e-06	4.52994e-06	5.51062e-06	5.74704e-06	4.15341e-06	6.40831e-06	5.02081e-06	4.56867e-06	1.04224e-05	2.18729e-06	4.95949e-06	3.85523e-06	5.00209e-06	2.51602e-06	2.82338e-06	4.82425e-06	4.4296e-06	5.02105e-06	5.54518e-06	2.92319e-06	3.45369e-06	2.78489e-06	3.1492e-06	2.5669e-06
Acidovorax_sp._Root219	5.82522e-06	6.4469e-06	7.57149e-06	5.88305e-06	5.25677e-06	5.9208e-06	5.0791e-06	6.18029e-06	6.33328e-06	3.82606e-06	2.74279e-06	3.67801e-06	6.1821e-06	3.87689e-06	4.17988e-06	4.41161e-06	2.46523e-06	1.63978e-06	2.55997e-06	2.83661e-06	3.29131e-06	2.10156e-06	5.20494e-07	3.72702e-06
Acidovorax_sp._Root267	3.15042e-06	2.75723e-06	3.95146e-06	3.46211e-06	2.34457e-06	2.83024e-06	2.10584e-06	3.40913e-06	1.02614e-05	2.35931e-06	2.43775e-06	3.62486e-06	1.61177e-06	2.63393e-06	2.21431e-06	2.67356e-06	7.98214e-06	7.60991e-06	7.64048e-06	3.80762e-06	4.67312e-06	2.81659e-06	2.05124e-06	2.40167e-06
Acidovorax_sp._Root275	3.08786e-06	5.20675e-06	3.82629e-06	3.77704e-06	2.20421e-06	2.30686e-06	3.23523e-06	1.50482e-06	8.32808e-06	4.5169e-06	5.12631e-06	3.56651e-06	2.36328e-06	3.45267e-06	2.49571e-06	3.64481e-06	4.21673e-06	7.93505e-06	9.38096e-06	6.82173e-06	3.68281e-06	1.90063e-06	3.16522e-06	3.9821e-06
Acidovorax_sp._Root402	9.31808e-07	1.85182e-06	1.97306e-06	1.11963e-06	1.05939e-06	2.48402e-06	8.84568e-07	1.72822e-06	2.99196e-06	1.25256e-06	5.71116e-07	1.48197e-06	9.35751e-07	6.49915e-07	1.04748e-06	1.25976e-06	5.85224e-07	1.51092e-06	3.84324e-07	1.53518e-06	1.62225e-06	9.38095e-07	6.76856e-07	1.67801e-06
Acidovorax_sp._Root568	5.10482e-07	9.39425e-07	1.12977e-06	1.53859e-06	1.00391e-06	8.33376e-07	8.99138e-07	9.94244e-07	1.40051e-06	7.15525e-07	8.12029e-07	1.0954e-06	4.24972e-07	6.8362e-07	8.2619e-07	4.25288e-07	4.99032e-07	9.63232e-07	2.86351e-07	5.33885e-07	1.32161e-06	5.56635e-07	3.19216e-07	1.01605e-06
Acidovorax_sp._Root70	1.19728e-07	1.48321e-06	8.89044e-07	8.10065e-07	7.31019e-07	1.29468e-06	1.14368e-06	8.59797e-07	2.49548e-06	9.05934e-07	6.66027e-07	1.48053e-06	2.20546e-07	0	7.56477e-08	4.02189e-07	1.30765e-06	1.05295e-06	1.09656e-07	5.98352e-07	1.23857e-06	2.731e-07	2.01761e-06	2.18463e-06
Acidovorax_sp._SCN_65-108	0	4.70927e-07	0	3.55691e-07	0	0	3.32725e-07	0	2.88809e-07	7.43658e-07	9.59957e-07	3.44483e-07	0	8.38498e-08	0	0	0	0	4.34406e-07	6.70566e-07	2.17897e-07	0	0	3.60021e-07
Acidovorax_sp._SCN_65-28	1.14978e-06	5.61593e-07	1.029e-06	8.05677e-07	3.12657e-07	1.15417e-06	1.40397e-06	2.56754e-07	4.21125e-06	3.50359e-07	1.00598e-06	2.21333e-07	4.28915e-07	2.82993e-07	5.55525e-07	4.00293e-07	2.70448e-07	3.54486e-07	5.77009e-07	2.11024e-07	4.50238e-07	2.35359e-07	5.59194e-07	5.93468e-07
Acidovorax_sp._SCN_68-22	1.97261e-06	1.33778e-06	1.92851e-06	2.04049e-06	1.03365e-06	1.95043e-06	1.58275e-06	2.23502e-06	4.53565e-06	1.98277e-06	2.89813e-06	8.99938e-07	3.01498e-06	8.74828e-07	2.30672e-06	2.54807e-06	1.33565e-06	1.68766e-06	1.20004e-06	2.26613e-06	2.47068e-06	2.00071e-06	1.57665e-06	2.24952e-06
Acidovorax_sp._SD340	3.03309e-06	3.00247e-06	2.49399e-06	2.31547e-06	3.72472e-06	9.89715e-07	1.92519e-06	2.445e-06	5.90706e-06	3.45491e-06	3.08171e-06	2.02055e-06	3.65673e-06	2.21449e-06	2.68441e-06	2.0573e-06	5.19805e-06	4.74912e-06	9.22361e-06	6.72445e-06	4.15824e-06	2.81636e-06	3.90812e-06	4.94218e-06
Acidovorax_sp._SLBN-42	4.58542e-06	4.55426e-06	8.24681e-06	4.72829e-06	6.42614e-06	7.31119e-06	6.5923e-06	5.66846e-06	4.19063e-06	6.34399e-06	5.606e-06	5.36255e-06	5.53798e-06	6.61642e-06	6.86528e-06	5.92047e-06	7.71644e-06	6.93117e-06	7.58236e-06	6.24502e-06	9.3086e-06	7.98117e-06	9.12818e-06	9.30547e-06
Acidovorax_sp._SRB_14	8.63608e-06	3.80547e-06	4.07723e-06	3.74329e-06	4.87528e-06	4.57434e-06	3.57764e-06	5.28208e-06	7.60454e-06	2.57185e-06	3.92087e-06	2.82394e-06	3.17993e-06	4.82587e-06	2.55908e-06	4.0213e-06	1.33646e-06	3.76095e-06	3.40028e-06	3.09002e-06	2.53919e-06	2.66277e-06	2.49896e-06	3.90025e-06
Acidovorax_sp._SRB_24	3.00737e-06	3.20138e-06	4.08078e-06	2.94151e-06	3.18959e-06	2.95279e-06	2.36959e-06	3.58918e-06	3.81428e-06	1.4591e-06	2.10375e-06	2.59769e-06	1.86347e-06	2.82534e-06	1.15899e-06	1.99519e-06	2.08394e-06	1.09297e-06	3.86932e-06	2.08461e-06	2.79102e-06	2.81324e-06	2.80938e-06	2.91985e-06
Acidovorax_sp._ST3	1.84516e-06	3.73497e-06	1.17572e-06	1.26565e-06	1.23725e-06	1.23964e-06	1.83097e-06	2.12447e-06	5.1765e-06	1.53053e-06	1.25804e-06	9.95661e-07	1.90525e-06	9.97565e-07	1.00241e-06	8.18233e-07	1.81043e-06	2.1254e-06	1.90439e-06	2.2106e-06	2.82259e-06	2.5001e-06	9.95332e-07	2.09415e-06
Acidovorax_sp._T1	2.08013e-07	0	4.46219e-07	0	2.55191e-07	5.32273e-08	0	1.02776e-07	3.44737e-07	7.13454e-07	2.63037e-07	2.08232e-07	3.53742e-08	0	2.05707e-07	3.00517e-07	1.45364e-07	4.63708e-07	0	1.58497e-07	4.04598e-07	0	8.03481e-07	4.10306e-07
Acidovorax_sp._T1m	2.18504e-07	0	0	0	0	4.41026e-07	0	2.8135e-07	1.6166e-07	0	0	0	0	0	4.82318e-08	0	1.3073e-07	0	0	0	1.77681e-07	0	2.32366e-07	6.44332e-08
Acidovorax_sp._YL-MeA13-2016	5.6984e-06	7.27299e-06	6.33763e-06	9.1506e-06	8.21122e-06	7.40485e-06	1.01215e-05	7.11616e-06	1.10187e-05	6.58184e-06	7.78045e-06	7.12176e-06	6.75247e-06	5.7264e-06	6.54252e-06	6.44502e-06	5.94646e-06	7.95629e-06	4.20335e-06	8.00376e-06	8.3361e-06	6.06785e-06	5.97771e-06	6.96896e-06
Acidovorax_temperans	6.3435e-06	4.7206e-06	3.04304e-06	4.61392e-06	4.33563e-06	6.36615e-06	4.55772e-06	4.79106e-06	1.13078e-05	3.20685e-06	4.93619e-06	3.38008e-06	2.02383e-06	3.11187e-06	2.69853e-06	2.13744e-06	2.64056e-06	4.55851e-06	7.30056e-06	3.98824e-06	4.10044e-06	2.22514e-06	3.49745e-06	2.50415e-06
Acidovorax_valerianellae	1.12405e-05	1.00822e-05	8.2862e-06	9.27123e-06	1.06929e-05	1.0253e-05	7.76315e-06	7.20794e-06	1.77416e-05	7.04751e-06	9.66137e-06	8.28377e-06	8.40588e-06	6.79064e-06	7.60863e-06	7.03163e-06	1.08304e-05	1.12034e-05	1.06538e-05	1.00197e-05	1.23282e-05	6.28889e-06	9.35988e-06	8.83571e-06
Acidovorax_virus_ACP17	7.04853e-08	2.88586e-07	0	9.68751e-08	0	0	0	0	4.69459e-07	0	6.15285e-07	3.363e-07	0	0	8.35724e-08	0	0	0	0	0	0	0	0	0
Acidovorax_wautersii	1.20577e-05	1.27619e-05	1.12344e-05	1.24292e-05	1.09847e-05	1.29656e-05	1.24821e-05	1.08749e-05	3.07293e-05	1.03015e-05	1.08106e-05	1.25109e-05	9.8247e-06	6.94077e-06	7.89986e-06	8.2689e-06	1.15851e-05	1.78389e-05	1.22487e-05	1.23512e-05	1.122e-05	1.04731e-05	1.07241e-05	1.25042e-05
Aciduliprofundum_boonei	7.86016e-07	2.16764e-07	5.14661e-07	1.63755e-07	9.51396e-07	5.78602e-07	8.55627e-07	4.2867e-07	8.32041e-07	3.5147e-07	1.70103e-06	2.93323e-07	6.05152e-07	6.48953e-07	9.60634e-07	7.02975e-07	0	7.45798e-07	1.5472e-07	0	3.62664e-07	5.9942e-07	2.3418e-07	1.46112e-07
Aciduliprofundum_sp.	3.05762e-07	4.48546e-07	6.66039e-07	4.57665e-07	2.91316e-07	5.1272e-07	5.65681e-07	4.49172e-07	2.85153e-07	4.1695e-07	9.47378e-07	2.87069e-08	4.03528e-07	7.10111e-07	9.67529e-07	8.2169e-07	2.82302e-07	6.5412e-07	3.49607e-07	4.30487e-08	7.26323e-08	0	1.25444e-07	3.02537e-07
Aciduliprofundum_sp._MAR08-339	1.12159e-06	6.36943e-07	8.50304e-07	7.41843e-07	9.75312e-07	6.38411e-07	3.65301e-07	7.03781e-07	1.39789e-06	2.54225e-06	1.24041e-06	1.09594e-06	1.57095e-06	7.99862e-07	7.51488e-07	6.35105e-07	1.63508e-06	1.05347e-06	1.12289e-06	9.39159e-07	1.2452e-06	1.83516e-06	1.65331e-06	1.4929e-06
Acinetobacter_apis	0	0	2.76157e-07	2.97891e-07	1.26789e-06	0	0	2.02959e-07	1.05468e-07	2.02983e-07	0	0	1.91893e-07	1.93567e-07	2.91761e-07	0	1.21743e-07	1.54569e-07	0	0	0	0	1.50131e-06	0
Acinetobacter_baumannii	8.38396e-05	0.000110642	0.000182304	2.35086e-05	0.000188413	6.10479e-05	3.04836e-05	0.000165615	0.000258129	0.000393351	0.000101903	0.00038145	0.000204784	0.000758181	0.000161385	0.000210139	0.000423284	0.000684993	0.000544033	0.000770978	0.000236399	0.00122423	0.000819331	0.000300437
Acinetobacter_baylyi	3.7394e-07	9.68916e-07	6.22221e-07	7.47669e-07	2.86654e-07	4.01791e-07	5.68083e-07	9.2988e-07	2.50502e-06	3.2978e-06	1.1181e-06	1.38316e-06	1.89627e-06	3.83126e-06	1.22e-06	5.7101e-07	2.7476e-06	2.32912e-06	2.88294e-06	3.69962e-06	1.41162e-06	9.52761e-06	4.57127e-06	1.16152e-06
Acinetobacter_beijerinckii	8.76202e-07	4.00849e-07	4.73586e-07	6.16032e-07	1.16417e-06	5.69679e-07	6.20145e-07	2.46475e-07	3.17702e-07	1.74102e-07	4.68497e-07	5.55401e-07	5.45847e-07	4.23968e-07	1.12305e-06	1.1605e-06	8.45389e-07	2.8186e-06	1.14175e-06	1.24237e-06	1.34103e-06	5.01533e-07	8.5257e-07	1.5794e-06
Acinetobacter_bereziniae	1.40849e-05	2.77083e-05	3.8195e-05	7.89892e-07	1.8396e-05	3.8091e-06	2.68213e-06	6.38581e-06	1.84267e-05	3.14205e-05	4.76156e-06	1.14353e-05	6.29693e-06	2.06511e-05	4.57411e-06	4.65056e-06	9.70506e-06	4.6969e-05	1.08957e-05	1.57413e-05	8.4814e-06	3.02715e-05	1.91292e-05	6.534e-06
Acinetobacter_bohemicus	0	0	5.00418e-08	5.33138e-08	2.28369e-08	1.55395e-07	0	5.16864e-07	1.87905e-07	0	1.85355e-07	3.7393e-07	5.76545e-08	0	1.19687e-07	9.79303e-08	3.39736e-07	5.06776e-07	4.11341e-07	2.45724e-07	1.38384e-07	3.61831e-07	2.32366e-07	7.08121e-08
Acinetobacter_boissieri	0	0	0	0	0	1.02906e-07	0	0	3.07965e-07	3.07648e-07	9.91658e-08	0	2.8395e-07	8.93663e-08	0	2.87993e-07	0	0	4.45837e-07	0	0	0	3.41669e-07	2.52646e-07
Acinetobacter_bouvetii	1.28532e-07	0	6.4798e-07	6.43556e-07	8.3561e-07	0	7.82608e-08	0	2.19975e-07	1.32097e-07	2.38571e-07	4.93881e-07	7.19464e-08	4.994e-08	1.42422e-07	0	2.86818e-07	4.23134e-07	0	7.69179e-08	1.58833e-07	0	1.54083e-07	7.05923e-08
Acinetobacter_brisouii	1.2486e-07	2.25372e-07	0	0	9.72201e-08	0	0	0	3.45186e-07	1.94261e-07	0	1.24443e-06	0	0	3.78133e-07	0	9.2583e-07	1.05454e-07	0	9.77648e-08	0	1.30239e-07	8.08936e-08	2.59305e-07
Acinetobacter_calcoaceticus	0	1.05174e-07	0	0	2.17589e-07	6.37848e-08	0	5.66154e-07	6.60563e-07	2.1687e-07	0	0	2.14792e-08	4.63967e-07	0	0	4.23453e-07	0	5.6006e-07	1.72906e-07	3.05927e-08	3.34188e-07	1.15408e-07	0
Acinetobacter_celticus	0	0	0	0	9.32248e-08	0	1.02598e-07	0	1.05468e-07	0	0	0	0	2.79117e-07	1.96891e-07	3.8399e-07	0	0	0	0	3.62664e-07	1.14448e-07	4.24944e-07	2.63029e-07
Acinetobacter_chinensis	0	0	0	2.45018e-07	3.92195e-07	0	3.03795e-07	6.69881e-08	0	0	0	0	0	0	0	0	0	0	0	0	0	0	0	0
Acinetobacter_colistiniresistens	0	1.44734e-07	0	0	0	0	0	0	0	2.19542e-07	0	1.27996e-07	3.21289e-07	0	0	6.6934e-08	8.93524e-08	0	1.0362e-07	2.94671e-07	0	0	0	5.81814e-07
Acinetobacter_cumulans	3.01385e-07	5.82142e-08	2.86778e-07	0	5.61128e-07	1.42398e-07	1.72636e-07	1.96978e-07	8.84957e-08	0	0	0	2.72887e-07	3.32761e-07	4.66658e-07	9.11976e-08	0	0	0	0	0	0	0	0
Acinetobacter_defluvii	0	0	0	0	0	0	0	0	1.99977e-07	3.29313e-07	8.16109e-07	0	0	0	0	2.05516e-07	0	0	0	0	0	0	3.6573e-07	0
Acinetobacter_gandensis	6.62135e-08	0	5.64866e-08	6.018e-08	0	5.84694e-08	0	0	0	0	0	2.11387e-07	0	5.14533e-08	2.72217e-07	0	3.49501e-07	1.48468e-07	8.51144e-07	1.58497e-07	6.68547e-08	0	0	2.52646e-07
Acinetobacter_genomosp._33YU	1.49542e-06	1.53129e-06	3.39958e-06	0	2.85942e-07	0	0	0	1.55547e-06	1.74148e-06	4.05193e-07	4.71564e-07	0	0	0	0	0	8.78127e-07	0	0	0	0	0	0
Acinetobacter_gerneri	2.49719e-07	0	0	0	0	1.85231e-07	0	3.21543e-07	0	0	0	0	1.00058e-07	0	4.10659e-07	3.64791e-07	7.79153e-08	0	9.9392e-07	2.5106e-07	0	6.68375e-08	0	1.53609e-07
Acinetobacter_guerrae	1.09252e-07	4.77433e-07	0	2.50855e-07	1.62034e-07	2.89423e-07	4.60383e-07	1.78635e-07	0	1.85566e-07	3.58886e-07	0	5.00292e-07	4.46831e-07	0	1.82852e-07	3.84451e-07	6.99413e-07	0	0	0	0	0	1.43292e-07
Acinetobacter_guillouiae	0	0	0	0	0	0	0	0	0	0	0	3.03295e-07	0	0	0	0	0	0	0	0	3.3512e-07	0	0	0
Acinetobacter_gyllenbergii	1.79132e-07	1.12686e-07	0	2.00962e-07	3.27183e-07	1.48422e-07	0	1.44282e-07	1.41953e-07	4.34738e-07	8.30696e-07	5.7188e-07	8.23027e-07	2.82811e-07	5.05244e-07	1.73173e-07	1.13117e-06	5.88059e-07	4.84052e-07	6.8286e-07	0	2.38752e-07	0	4.0291e-07
Acinetobacter_haemolyticus	1.35013e-06	1.42032e-06	5.28312e-07	1.07111e-06	1.20786e-06	4.75422e-07	6.93944e-07	8.62376e-08	6.78659e-07	6.25685e-07	2.16802e-07	2.14179e-07	1.41033e-06	1.362e-06	1.69492e-06	9.05228e-07	2.52972e-07	1.22858e-06	5.21936e-07	1.29146e-07	0	0	4.61633e-07	9.60055e-08
Acinetobacter_halotolerans	0	0	2.07118e-07	0	1.89039e-07	5.67497e-07	0	0	0	0	0	0	0	0	0	3.03992e-07	0	0	0	0	0	0	0	0
Acinetobacter_idrijaensis	6.12145e-07	1.51693e-07	0	0	1.49454e-07	4.22703e-07	7.49751e-08	3.65365e-07	1.90102e-07	1.4988e-07	0	0	2.59411e-07	2.43523e-07	2.07304e-07	0	0	1.39303e-07	0	0	8.48541e-08	8.03335e-08	1.19764e-07	2.56349e-07
Acinetobacter_indicus	2.40367e-05	1.27462e-05	5.14108e-05	7.184e-06	4.8865e-05	2.76695e-05	8.66698e-06	0.000111929	0.000159255	0.000250414	6.97281e-05	0.000305591	0.000166637	0.000584545	0.000122517	0.000152504	0.000262962	0.00036865	0.000437547	0.000637064	0.000141081	0.000983008	0.000648857	0.0002449
Acinetobacter_johnsonii	1.74153e-07	8.65281e-07	3.44065e-07	4.22979e-07	8.50268e-07	1.02233e-06	1.31927e-06	3.77597e-07	7.53805e-06	3.85893e-06	5.15691e-07	1.10468e-05	7.57671e-07	1.11389e-06	6.41373e-07	1.05092e-06	7.22287e-07	6.3139e-07	4.41998e-07	3.65156e-07	7.0249e-07	3.91958e-07	1.93211e-06	1.10537e-06
Acinetobacter_junii	8.07236e-07	9.19688e-07	1.1628e-06	1.55018e-06	1.52963e-06	5.08748e-07	1.11522e-06	3.89024e-07	9.51359e-07	1.78502e-06	3.64484e-07	1.73107e-06	3.48836e-07	7.16142e-07	1.85414e-06	1.21353e-06	8.24406e-07	4.29545e-07	9.49454e-07	1.30336e-06	1.81343e-06	1.50671e-06	1.02611e-06	1.51696e-06
Acinetobacter_kookii	0	0	0	0	0	0	5.56958e-07	0	0	0	0	0	0	0	0	0	0	0	0	0	0	0	0	0
Acinetobacter_lactucae	9.32108e-07	5.56802e-07	1.06518e-07	0	4.4191e-07	3.27232e-07	1.39772e-06	4.06832e-07	2.96805e-07	2.63728e-07	8.86659e-08	2.4845e-07	3.09391e-07	4.40661e-07	9.54533e-07	0	1.39135e-07	5.82452e-07	1.44802e-07	4.12928e-07	3.78207e-07	4.34188e-07	3.46225e-07	0
Acinetobacter_larvae	0	1.21354e-07	2.16123e-07	0	0	3.56213e-07	5.1079e-07	0	1.18448e-07	1.19904e-07	1.79443e-07	7.18519e-07	0	1.56735e-07	0	0	0	0	0	0	6.78833e-08	0	0	0
Acinetobacter_lwoffii	3.37239e-08	3.24166e-07	9.21618e-07	1.49882e-07	5.40118e-07	1.26524e-07	0	0	4.83222e-07	3.15963e-07	7.06717e-07	8.40455e-08	0	2.5544e-07	4.10508e-07	3.29279e-07	3.05643e-07	6.04728e-07	4.91982e-07	6.24978e-07	6.07747e-08	3.39018e-07	4.08284e-07	2.71714e-07
Acinetobacter_marinus	1.15002e-07	0	9.68342e-08	6.89044e-08	0	0	2.19275e-07	0	4.07824e-07	0	3.29451e-07	0	1.75732e-07	8.69805e-08	2.13784e-07	9.59975e-08	9.06076e-07	1.26782e-07	4.77234e-07	4.07565e-07	3.64703e-07	2.27602e-07	3.10988e-07	0
Acinetobacter_nectaris	7.80373e-08	3.76752e-07	6.65735e-08	7.09264e-08	9.45196e-08	5.35969e-07	9.39447e-08	4.65778e-07	6.87422e-08	0	0	1.24567e-07	0	3.34121e-07	3.2392e-07	0	0	0	0	0	2.12646e-07	2.32075e-07	7.72823e-08	0
Acinetobacter_nosocomialis	1.28942e-06	2.02784e-06	7.12176e-07	9.98216e-07	8.37085e-07	7.99232e-07	5.99802e-07	1.04016e-06	1.52618e-06	1.27365e-06	6.2557e-07	1.26695e-06	7.00409e-07	2.40145e-06	9.11806e-07	1.39395e-06	5.0284e-07	1.6087e-06	2.23126e-06	2.21815e-06	1.07044e-06	2.69288e-06	2.48155e-06	1.197e-06
Acinetobacter_oleivorans	0	1.77296e-06	0	1.8054e-07	3.44578e-07	8.77041e-08	7.87617e-08	0	9.10661e-07	2.51699e-07	4.98877e-07	3.00552e-07	1.10477e-06	4.29836e-07	2.69015e-07	1.82591e-07	0	4.97805e-07	1.66096e-07	1.06078e-06	1.94163e-07	1.89879e-07	1.54352e-07	9.04864e-07
Acinetobacter_parvus	0	6.14652e-07	2.90503e-07	0	0	0	0	9.74373e-08	3.23152e-07	3.38859e-07	0	0	0	9.84324e-08	3.37109e-07	0	0	0	1.48612e-07	0	0	0	0	0
Acinetobacter_phage_vB_AbaP_Alexa	0	0	0	0	0	6.77014e-08	0	1.26322e-06	0	0	0	3.44483e-07	0	0	6.54472e-07	0	0	0	0	0	0	0	0	0
Acinetobacter_piscicola	8.65364e-08	0	0	4.19098e-07	2.99361e-07	3.90783e-07	0	3.53576e-07	0	2.43257e-07	0	2.07201e-07	2.27354e-07	2.96097e-07	7.11538e-08	0	9.64299e-08	1.88357e-07	3.35482e-07	1.03573e-07	7.97077e-07	2.48159e-07	8.56992e-08	9.50549e-08
Acinetobacter_pittii	1.73031e-06	9.90774e-07	1.80109e-06	1.32396e-07	1.84254e-06	1.67207e-06	1.09069e-06	2.0449e-06	1.71451e-06	2.0037e-06	1.30363e-06	9.84827e-07	1.19471e-06	1.59596e-06	1.49118e-06	1.48331e-06	2.34073e-06	1.47734e-06	4.70606e-07	2.62022e-06	1.5391e-06	1.25675e-06	9.2916e-07	1.75374e-06
Acinetobacter_populi	1.2486e-07	0	0	5.59419e-07	5.10466e-07	3.26111e-07	1.09823e-07	4.18283e-07	9.99887e-08	1.19091e-06	0	0	4.97474e-07	0	3.73326e-07	0	4.30067e-07	7.0667e-07	0	0	7.53436e-07	4.44215e-07	2.70357e-07	9.73886e-08
Acinetobacter_portensis	0	0	6.65735e-08	7.09264e-08	0	0	0	0	0	0	2.01873e-07	0	0	0	0	0	0	0	0	0	0	0	0	0
Acinetobacter_pragensis	2.53339e-07	5.71596e-08	9.68342e-08	5.39095e-07	2.36326e-07	9.24068e-07	4.34091e-07	2.71836e-07	5.66692e-07	0	2.18452e-07	5.96085e-07	3.49718e-07	2.17782e-07	3.32071e-07	3.37121e-07	0	0	0	0	0	0	1.12411e-07	1.39138e-07
Acinetobacter_proteolyticus	0	0	7.23906e-08	5.62487e-07	3.35593e-07	1.08704e-07	2.95348e-07	2.4707e-07	1.50727e-06	8.33644e-07	1.0339e-06	9.05945e-08	4.19951e-07	5.97306e-07	9.78725e-07	4.2352e-07	0	0	0	1.01561e-07	0	4.05567e-07	0	9.32092e-08
Acinetobacter_pullicarnis	8.32398e-08	6.36131e-08	7.10118e-08	0	5.48823e-08	0	3.77294e-07	0	7.3325e-08	0	0	0	0	0	0	1.38968e-07	0	2.14925e-07	3.22701e-07	0	0	3.97842e-07	0	0
Acinetobacter_puyangensis	1.74804e-07	2.32001e-07	2.93863e-07	7.94376e-08	7.68263e-07	2.34663e-07	2.26012e-07	6.00213e-08	8.8309e-08	0	4.37123e-07	3.34837e-07	4.21069e-07	3.30802e-07	1.29358e-07	2.72949e-07	1.43227e-07	1.42512e-06	6.83578e-07	0	0	1.22863e-07	3.93067e-07	2.30413e-07
Acinetobacter_qingfengensis	0	0	0	0	2.55203e-07	0	0	0	0	0	0	0	0	0	0	0	0	0	0	0	0	0	0	0
Acinetobacter_radioresistens	2.27018e-07	6.81682e-07	4.9185e-07	7.15508e-07	1.54668e-07	1.97709e-07	5.69469e-07	5.52629e-07	0	1.64079e-07	2.72865e-07	4.58644e-07	7.95919e-08	0	9.33316e-08	3.08411e-07	3.37015e-07	0	1.1889e-07	2.78956e-07	9.16196e-07	7.82122e-07	1.08195e-07	1.28007e-07
Acinetobacter_rudis	0	8.2167e-08	0	0	0	2.41186e-07	0	0	0	0	0	1.35452e-07	0	0	0	0	0	1.09549e-07	0	2.03123e-07	3.64233e-07	4.05567e-07	0	1.86418e-07
Acinetobacter_schindleri	1.78371e-07	0	1.11287e-07	0	5.77309e-07	0	4.17103e-07	0	0	4.77168e-07	3.07616e-07	0	1.42941e-07	0	7.3332e-08	2.23341e-07	0	5.47746e-07	1.09656e-07	4.06246e-07	0	1.62227e-07	0	0
Acinetobacter_seifertii	0	6.43854e-07	0	0	8.00636e-08	1.81599e-07	2.75203e-07	8.82667e-08	7.14242e-07	1.9731e-07	0	0	1.04539e-07	4.76848e-07	0	0	3.10832e-07	0	0	0	5.70609e-07	6.94519e-07	4.42984e-07	0
Acinetobacter_soli	1.01597e-06	1.29254e-06	1.4318e-06	9.76204e-07	4.78967e-07	1.428e-06	9.18218e-07	1.53734e-06	1.63753e-06	7.52783e-07	1.85167e-06	1.2801e-06	4.12249e-07	3.50853e-07	1.38901e-06	9.05079e-07	4.72255e-07	4.6683e-07	3.72348e-07	8.50863e-07	4.80463e-07	5.98775e-07	1.15408e-07	5.05523e-07
Acinetobacter_sp.	3.74781e-06	5.51998e-06	4.04724e-06	3.8139e-06	3.79768e-06	3.28541e-06	2.06915e-06	4.28134e-06	4.13986e-06	4.69942e-06	3.49076e-06	3.43162e-06	5.68624e-06	3.60551e-06	5.23382e-06	4.80414e-06	2.92724e-06	3.62488e-06	2.2085e-06	2.99925e-06	6.939e-06	4.35843e-06	5.54185e-06	5.21961e-06
Acinetobacter_sp._1000160	0	0	0	0	8.72488e-08	1.97896e-07	0	2.88564e-07	0	0	0	0	8.9796e-08	8.70748e-08	0	9.3536e-08	0	6.01791e-07	0	0	0	0	0	0
Acinetobacter_sp._10FS3-1	0	0	1.96217e-07	0	0	0	2.05195e-07	3.94877e-07	0	0	0	0	2.72887e-07	0	0	0	0	0	0	0	0	0	0	0
Acinetobacter_sp._1294596	0	0	0	0	0	0	0	0	0	0	0	0	0	0	0	0	0	3.09139e-07	0	0	0	3.43343e-07	0	0
Acinetobacter_sp._1564232	0	0	0	0	0	0	0	0	0	0	0	0	0	0	0	0	0	0	0	0	0	0	4.38259e-07	0
Acinetobacter_sp._185	3.27757e-07	2.95801e-07	3.72812e-07	1.98594e-07	8.50676e-08	0	2.31583e-07	0	0	2.92266e-07	0	4.35986e-07	0	8.48979e-08	2.69495e-07	1.36249e-07	1.21743e-07	7.05223e-07	2.82364e-07	3.26247e-07	3.49573e-07	2.08867e-07	4.08653e-07	8.22647e-07
Acinetobacter_sp._187	0	0	0	0	0	0	0	0	0	0	0	1.88534e-07	2.8395e-07	9.17816e-08	9.71153e-08	0	0	0	0	0	0	0	0	0
Acinetobacter_sp._2JN-4	0	1.01129e-07	0	0	0	0	0	1.21774e-07	9.87068e-08	0	0	1.78866e-07	0	0	1.89982e-07	9.3536e-08	0	0	0	0	0	0	0	0
Acinetobacter_sp._3636	0	0	0	0	0	0	0	0	1.09988e-07	0	0	2.98962e-07	2.06003e-07	3.9952e-07	0	1.07291e-07	0	0	0	0	0	0	0	0
Acinetobacter_sp._3664	0	0	0	0	0	0	0	0	0	8.29122e-08	8.01766e-08	0	0	7.22536e-08	1.30275e-07	7.7615e-08	1.90022e-07	0	3.60464e-07	0	0	0	0	0
Acinetobacter_sp._38-8	0	0	0	0	0	0	0	5.51667e-07	4.99943e-07	0	0	0	0	0	0	0	0	0	0	0	0	0	0	0
Acinetobacter_sp._39-4	2.18504e-07	0	0	0	0	0	0	0	0	9.74219e-08	0	0	0	8.48979e-08	0	4.55988e-07	0	0	0	0	0	0	0	0
Acinetobacter_sp._51m	0	0	1.0076e-07	0	3.6786e-07	0	0	0	0	0	0	2.82802e-07	0	0	0	0	0	4.57442e-07	0	0	0	0	0	2.59474e-07
Acinetobacter_sp._72431	0	3.64063e-07	0	0	0	5.93689e-08	0	0	0	0	1.15948e-07	0	0	0	0	0	0	0	0	0	0	0	0	0
Acinetobacter_sp._88816	2.27018e-07	0	0	0	8.83819e-08	1.00233e-07	0	0	1.99977e-07	2.02435e-07	2.81697e-07	9.05945e-08	0	0	0	0	4.75094e-07	4.12814e-07	2.75477e-07	0	1.14608e-07	5.2928e-07	4.49642e-07	2.49365e-07
Acinetobacter_sp._8I-beige	8.09276e-08	0	0	0	3.15065e-07	0	0	0	0	0	0	0	0	0	0	0	0	0	0	0	0	0	0	0
Acinetobacter_sp._A47	0	0	0	0	0	0	0	0	0	0	0	0	0	0	0	3.17209e-07	0	0	0	5.10284e-07	0	0	0	0
Acinetobacter_sp._AG1	0	0	0	0	0	0	3.94806e-07	0	0	0	0	0	0	0	0	0	0	0	0	0	0	0	0	7.05923e-07
Acinetobacter_sp._ANC_3781	0	4.68596e-07	0	7.8651e-08	0	3.82077e-07	0	0	0	0	0	0	0	0	0	0	0	0	0	0	0	0	0	0
Acinetobacter_sp._ANC_3813	0	0	7.84867e-08	5.85329e-07	1.43272e-07	0	8.2078e-08	7.89755e-08	4.2797e-07	5.95618e-07	6.98208e-07	7.34292e-08	0	0	0	5.21129e-07	5.92437e-07	0	2.60963e-07	7.60239e-07	0	3.43343e-07	6.69192e-07	0
Acinetobacter_sp._ANC_3832	1.75724e-07	0	0	0	2.80635e-07	1.59133e-07	0	0	2.18007e-07	1.03917e-07	2.1382e-07	3.99941e-07	7.34587e-07	1.81116e-07	2.99709e-07	1.09711e-07	0	3.00895e-07	1.16439e-07	1.39478e-07	3.40793e-07	2.27683e-07	0	6.09887e-07
Acinetobacter_sp._ANC_3862	0	0	0	0	9.58508e-08	1.08704e-07	5.49113e-07	0	0	0	0	0	0	0	0	0	0	0	0	0	0	0	0	0
Acinetobacter_sp._ANC_3903	0	0	0	0	0	0	0	0	0	3.64332e-07	0	0	1.86776e-07	2.71673e-07	0	0	0	0	0	0	0	0	0	0
Acinetobacter_sp._ANC_3929	0	1.55423e-07	1.88886e-07	3.50609e-07	9.32205e-07	0	9.9615e-07	9.69922e-07	1.14912e-07	0	0	0	0	0	3.70965e-07	2.0489e-07	0	0	1.91011e-08	0	8.99417e-07	4.52653e-07	0	9.7343e-07
Acinetobacter_sp._ANC_4105	0	0	0	0	0	2.30387e-07	4.65517e-07	0	0	0	0	0	0	0	0	3.74144e-07	0	0	0	0	0	0	0	0
Acinetobacter_sp._ANC_4169	0	4.06599e-07	0	6.57529e-07	2.10477e-07	0	0	0	0	5.41634e-07	0	0	0	0	0	0	0	1.48468e-07	5.9445e-07	2.75285e-07	0	1.0993e-07	0	0
Acinetobacter_sp._ANC_4173	0	0	1.71408e-07	0	0	0	6.37922e-07	0	8.84957e-08	0	2.59883e-07	0	0	0	2.95337e-07	1.07291e-07	0	1.29696e-07	0	0	0	0	0	0
Acinetobacter_sp._ANC_4177	1.28532e-07	0	1.09651e-07	0	2.00159e-07	0	0	0	0	3.43842e-07	1.10832e-07	0	0	0	1.05684e-07	0	2.86453e-07	6.6374e-07	0	3.07672e-07	2.59554e-07	0	0	0
Acinetobacter_sp._ANC_4178	0	0	0	2.81195e-07	0	1.75408e-07	0	5.11546e-07	0	0	0	0	0	0	0	0	2.99674e-07	8.67967e-08	8.68811e-08	1.60936e-07	4.073e-07	0	1.33163e-07	0
Acinetobacter_sp._ANC_4216	0	0	0	0	0	0	9.50904e-08	0	0	0	0	0	0	0	0	0	3.5632e-07	1.04478e-07	0	3.87438e-07	0	0	2.40434e-07	0
Acinetobacter_sp._ANC_4277	0	0	9.00841e-08	0	7.94406e-08	7.32756e-08	5.06377e-08	6.97135e-08	3.67491e-07	4.48217e-08	2.78062e-07	3.29246e-07	1.25638e-07	1.93554e-07	3.71854e-07	2.83884e-08	0	0	4.39476e-08	0	0	4.5837e-08	0	1.43e-07
Acinetobacter_sp._ANC_4279	2.48261e-07	0	0	0	0	4.30676e-07	2.13628e-07	0	0	1.14614e-07	1.10832e-07	1.02585e-06	1.03001e-07	0	0	0	0	0	0	0	1.29777e-07	0	0	0
Acinetobacter_sp._ANC_4281	3.88452e-07	0	0	0	3.53276e-07	0	0	0	0	0	0	0	0	0	0	0	0	0	0	0	0	0	0	0
Acinetobacter_sp._ANC_4282	0	0	0	0	0	0	0	0	0	0	2.79133e-07	0	0	0	0	0	0	0	0	0	0	0	0	0
Acinetobacter_sp._ANC_4470	0	0	0	3.95468e-07	0	0	0	0	0	0	0	9.05945e-08	1.66764e-07	3.38122e-07	0	0	3.79458e-07	0	2.93365e-07	1.35855e-07	1.14608e-07	3.97842e-07	4.12172e-07	0
Acinetobacter_sp._ANC_4471	1.07903e-07	0	0	0	0	0	0	0	2.99966e-07	3.84877e-07	2.79133e-07	3.44483e-07	0	0	9.33316e-08	0	0	0	0	0	0	0	0	0
Acinetobacter_sp._ANC_4472	1.2486e-07	0	0	0	0	0	2.74692e-07	0	0	0	0	0	0	0	0	0	0	0	0	0	0	0	0	0
Acinetobacter_sp._ANC_4558	0	2.92677e-07	0	0	2.58433e-07	9.64745e-08	0	0	0	0	0	0	0	0	0	9.47508e-08	0	2.82089e-07	5.64727e-07	0	0	0	1.83283e-07	0
Acinetobacter_sp._ANC_4635	0	0	3.28952e-07	0	0	0	0	0	0	3.43842e-07	0	0	0	0	0	0	0	0	0	0	0	0	0	0
Acinetobacter_sp._ANC_4641	0	0	0	0	0	0	0	0	0	0	3.11154e-07	0	0	0	0	0	0	0	3.22701e-07	0	0	0	0	2.74301e-07
Acinetobacter_sp._ANC_4654	0	0	0	0	0	0	0	0	0	9.62192e-08	0	0	0	3.35399e-07	0	2.70215e-07	0	0	0	0	0	0	0	0
Acinetobacter_sp._ANC_4862	0	0	0	0	0	0	0	0	0	0	0	2.71783e-07	0	0	0	0	0	0	0	0	0	0	0	0
Acinetobacter_sp._ANC_4910	0	3.06331e-07	0	0	1.98216e-07	0	7.5703e-08	0	3.73744e-07	1.51335e-07	0	6.7726e-08	0	0	0	0	0	0	0	0	0	0	8.40351e-08	0
Acinetobacter_sp._ANC_4945	1.3045e-07	1.17732e-07	3.33861e-07	0	0	0	0	2.2396e-07	0	2.32649e-07	0	0	0	0	0	0	1.45364e-07	3.36823e-07	1.68575e-07	1.56132e-07	0	0	1.29188e-07	4.29875e-07
Acinetobacter_sp._ANC_4973	0	2.32001e-07	0	0	0	3.40498e-07	0	0	0	0	0	0	0	0	0	0	0	0	0	0	0	0	0	0
Acinetobacter_sp._ANC_4999	2.30005e-07	6.91932e-08	0	0	5.45797e-07	1.35403e-07	3.41992e-07	3.98892e-07	0	1.11339e-07	0	0	1.00058e-07	2.60243e-07	0	1.27997e-07	0	0	0	0	0	0	7.59265e-08	0
Acinetobacter_sp._ANC_5054	0	1.6766e-07	0	5.33138e-08	0	2.01392e-07	6.74031e-08	2.55141e-07	0	0	0	0	0	0	0	0	0	0	0	0	0	0	0	0
Acinetobacter_sp._ANC_5084	0	0	0	0	0	0	0	0	0	3.48974e-07	6.74919e-07	1.04116e-07	8.86594e-08	0	0	0	0	1.68412e-07	2.85938e-07	2.64831e-07	0	6.34533e-07	2.1913e-07	1.43292e-07
Acinetobacter_sp._ANC_5318	0	0	0	0	0	0	0	0	0	7.08523e-08	6.85145e-08	6.34161e-08	6.36736e-08	0	0	0	0	0	0	0	0	0	2.36062e-07	8.72777e-08
Acinetobacter_sp._ANC_5380	0	0	0	2.48242e-07	1.86253e-07	1.60791e-07	5.68561e-07	5.47177e-07	0	0	2.17402e-07	0	0	0	7.48597e-08	0	0	0	0	0	0	0	0	0
Acinetobacter_sp._ANC_5414	1.13509e-07	0	0	0	3.44799e-07	1.00233e-07	7.80116e-07	3.89749e-07	1.99977e-07	0	0	0	0	0	0	0	0	0	0	0	0	0	0	0
Acinetobacter_sp._ANC_5600	0	0	0	3.6523e-07	7.82231e-08	8.87122e-08	8.96254e-08	1.72475e-07	0	0	8.66276e-08	0	0	0	0	2.5158e-07	0	0	0	0	0	0	0	0
Acinetobacter_sp._Ac_3412	0	0	0	0	0	8.38909e-08	0	8.15507e-08	0	0	0	0	0	0	7.81145e-08	0	1.05863e-07	1.22648e-07	0	1.13705e-07	4.7961e-07	9.08118e-08	9.40828e-08	0
Acinetobacter_sp._Ac_5812	1.43178e-07	1.64334e-07	2.94325e-07	4.13737e-07	0	3.54686e-07	0	9.87193e-08	2.26445e-07	0	1.10832e-07	0	0	8.93663e-08	3.91913e-07	0	0	1.65935e-07	0	0	0	0	0	0
Acinetobacter_sp._B301	1.28532e-07	0	0	0	0	0	1.14668e-07	0	0	0	0	0	3.09004e-07	0	1.05684e-07	2.14583e-07	0	0	0	0	0	0	0	0
Acinetobacter_sp._B51(2017)	0	0	0	0	0	0	0	0	9.74573e-08	3.73729e-07	9.54e-08	1.76602e-07	0	0	0	9.2352e-08	0	0	0	9.26909e-07	9.83572e-07	0	0	1.12948e-07
Acinetobacter_sp._BIGb0102	0	0	0	0	0	0	0	0	0	0	2.45759e-07	0	0	0	0	0	0	0	0	0	0	0	9.40828e-08	0
Acinetobacter_sp._BIGb0196	0	9.73831e-08	0	0	0	0	1.92529e-07	0	9.5051e-08	0	4.65222e-07	8.61207e-08	0	4.19249e-07	0	0	4.80959e-07	4.1791e-07	4.18316e-07	1.00501e-06	0	0	0	1.18525e-07
Acinetobacter_sp._BS1	0	0	0	0	0	0	0	8.70537e-07	0	1.9984e-07	0	2.71783e-07	0	0	0	0	7.00677e-08	0	0	0	0	0	0	6.90687e-08
Acinetobacter_sp._CFCC_10889	1.10635e-07	0	9.68342e-08	0	2.65146e-07	0	3.25325e-07	1.99174e-07	0	0	0	2.64903e-07	5.78319e-07	0	0	0	0	2.07038e-07	0	0	0	0	0	8.80784e-08
Acinetobacter_sp._CFCC_11171	4.60009e-07	0	0	0	0	0	0	9.87193e-08	0	0	0	4.58933e-07	9.21591e-08	1.78733e-07	0	0	0	0	0	0	0	0	0	0
Acinetobacter_sp._CIP-A165	0	1.62444e-07	0	8.27474e-08	1.203e-07	0	8.1223e-08	1.56306e-07	3.12127e-07	0	0	1.88534e-07	1.08199e-07	2.12245e-07	0	0	0	0	0	0	0	0	0	0
Acinetobacter_sp._CIP_102129	1.21391e-07	0	4.20327e-07	2.2066e-07	0	1.07194e-07	0	0	3.46529e-07	1.08247e-07	3.14025e-07	9.68858e-08	0	0	2.99439e-07	0	1.43227e-07	1.56716e-07	1.16267e-06	2.90579e-07	3.74911e-07	0	1.20217e-07	1.41185e-07
Acinetobacter_sp._CIP_102143	1.28532e-07	0	2.41231e-07	5.841e-08	0	8.18898e-08	3.1396e-07	1.10333e-07	9.62391e-08	8.21559e-07	1.88415e-07	0	5.15007e-08	4.994e-08	0	0	0	0	0	0	0	0	0	0
Acinetobacter_sp._CIP_70.18	1.80582e-07	3.25952e-08	9.24327e-08	5.58032e-07	2.81215e-08	0	6.44414e-08	3.10028e-08	4.05e-08	1.28822e-07	1.38462e-07	8.64766e-08	5.78851e-08	8.78168e-08	8.90893e-08	1.5074e-07	8.0491e-08	0	0	3.02586e-07	1.09399e-07	6.9047e-08	2.14602e-07	0
Acinetobacter_sp._COS3	0	0	0	6.90761e-08	0	0	0	0	6.69489e-08	0	0	2.42636e-07	0	0	0	0	0	0	0	0	0	0	0	0
Acinetobacter_sp._DSM_11652	0	0	0	0	0	0	0	0	0	0	0	0	0	0	0	0	0	0	0	0	0	0	3.5571e-07	0
Acinetobacter_sp._ETR1	0	0	3.0228e-07	1.07348e-07	1.8393e-07	0	0	2.02775e-07	0	0	0	0	0	0	0	0	0	0	0	0	0	0	0	0
Acinetobacter_sp._FDAARGOS_131	0	0	7.84867e-08	0	0	0	0	7.89755e-08	0	0	0	0	0	0	2.26943e-07	0	1.84126e-07	0	0	0	0	0	0	6.0635e-07
Acinetobacter_sp._FDAARGOS_724	0	0	0	0	0	0	0	0	0	0	0	0	6.85183e-07	0	0	0	0	0	0	0	0	0	0	0
Acinetobacter_sp._HR7	2.53339e-07	6.10936e-07	0	0	4.00318e-07	2.23709e-07	3.46552e-07	0	0	7.9067e-07	3.27678e-07	0	3.04526e-07	1.96865e-07	1.04153e-07	0	1.41151e-07	0	3.27378e-07	4.54819e-07	0	1.21082e-07	1.25444e-07	0
Acinetobacter_sp._JW	0	0	0	0	0	9.76957e-08	0	0	0	0	0	0	0	0	0	2.77056e-07	0	0	0	0	0	0	0	0
Acinetobacter_sp._KPC-SM-21	1.2486e-07	1.02442e-07	1.00708e-06	0	4.50748e-07	0	0	4.16815e-07	0	0	0	1.99308e-07	1.00058e-07	0	0	0	0	0	0	0	0	0	0	0
Acinetobacter_sp._Leaf130	4.68224e-07	4.69526e-08	8.87647e-08	9.45685e-08	0	0	0	0	7.91452e-08	0	0	1.24567e-07	0	4.04276e-08	8.5554e-08	0	0	0	0	0	0	4.97303e-08	0	0
Acinetobacter_sp._LoGeW2-3	0	0	0	2.90625e-07	0	0	9.50904e-08	0	4.87287e-07	0	1.19666e-07	3.28542e-07	2.06003e-07	0	0	8.89733e-08	0	0	0	0	0	1.22863e-07	3.36423e-07	0
Acinetobacter_sp._MB5	0	5.84298e-08	5.52314e-08	0	5.04104e-08	0	0	0	2.09616e-07	2.52575e-07	7.04532e-07	1.03345e-07	2.38082e-07	2.46132e-07	3.75962e-07	9.11976e-08	0	0	0	0	0	2.9723e-07	1.28231e-07	7.8523e-07
Acinetobacter_sp._MN12	0	2.99545e-07	0	0	0	0	0	0	4.59649e-07	1.16325e-07	0	0	0	0	4.10659e-07	0	0	0	0	0	0	0	0	0
Acinetobacter_sp._MYb10	0	3.1137e-07	2.0152e-07	0	0	0	0	0	0	0	0	9.42672e-08	2.77703e-07	0	0	0	0	0	0	0	0	0	0	0
Acinetobacter_sp._Marseille-P8049	0	0	0	0	0	5.01166e-07	3.03795e-07	9.74373e-08	9.99887e-08	0	0	2.71783e-07	9.09622e-08	0	0	0	1.26486e-07	2.9308e-07	0	0	4.58432e-07	0	1.12411e-07	1.24682e-07
Acinetobacter_sp._Marseille-Q1618	0	2.0758e-07	6.54056e-08	3.13569e-07	0	1.01552e-07	1.36797e-07	0	6.75362e-08	1.36732e-07	6.61105e-08	4.82613e-07	0	1.19155e-07	6.30398e-08	6.39983e-08	1.70867e-07	0	9.9075e-08	9.17617e-08	0	0	7.59265e-08	1.68431e-07
Acinetobacter_sp._Marseille-Q1620	7.76155e-07	5.78659e-07	4.0304e-07	1.01214e-06	1.34006e-06	5.80873e-07	3.6127e-07	5.79357e-07	1.78358e-07	1.60539e-07	2.03692e-07	4.57869e-07	4.32685e-07	2.3601e-07	4.9945e-07	4.50706e-07	0	0	0	4.03893e-08	0	0	0	0
Acinetobacter_sp._Marseille-Q1623	0	0	9.43827e-08	0	0	2.93087e-07	0	0	0	0	0	0	0	0	0	0	0	0	0	0	0	0	0	0
Acinetobacter_sp._NBRC_100985	0	0	0	0	0	0	0	0	0	4.63914e-07	0	0	0	0	0	0	0	0	0	0	0	0	0	0
Acinetobacter_sp._NBRC_110496	0	9.39051e-08	0	0	8.10168e-08	0	3.71305e-07	0	0	0	0	0	0	1.6171e-07	0	0	0	0	0	0	0	0	0	0
Acinetobacter_sp._NCu2D-2	0	0	0	4.4132e-07	0	0	0	0	0	0	0	0	0	0	1.99626e-07	0	0	0	0	0	0	0	0	0
Acinetobacter_sp._NFM2	0	0	2.22574e-07	4.74254e-07	0	0	0	0	0	0	0	0	0	0	0	0	0	0	0	0	0	0	0	0
Acinetobacter_sp._NIPH_1867	0	0	1.86406e-07	0	0	0	9.74676e-08	8.59681e-07	0	0	0	0	8.75511e-08	0	0	0	0	0	0	1.3076e-07	0	0	0	0
Acinetobacter_sp._NIPH_2100	0	0	0	1.00554e-07	2.58433e-07	0	1.97403e-07	4.74852e-07	9.74573e-08	9.86551e-08	0	0	1.77319e-07	0	9.09688e-08	9.2352e-08	0	0	0	0	0	0	0	0
Acinetobacter_sp._NIPH_2168	0	0	0	0	0	0	0	0	2.65487e-07	0	0	0	4.57618e-07	0	0	2.21787e-07	5.12601e-07	1.48468e-07	1.25214e-07	0	4.64464e-07	0	7.46174e-08	1.26323e-07
Acinetobacter_sp._NIPH_298	0	0	0	1.13482e-07	0	0	0	5.35905e-07	0	0	0	0	0	0	0	0	0	0	0	0	0	0	0	0
Acinetobacter_sp._NIPH_758	0	0	0	0	0	0	0	0	0	0	0	0	0	0	0	0	3.89577e-07	0	0	0	0	0	0	0
Acinetobacter_sp._NRRL_B-65365	0	0	0	0	0	0	0	0	0	0	0	0	0	0	0	0	4.16214e-07	0	1.93069e-07	0	0	0	0	0
Acinetobacter_sp._P8-3-8	0	0	0	0	0	0	0	0	0	0	0	0	1.03001e-07	8.98919e-07	3.17053e-07	0	0	0	0	0	0	0	0	0
Acinetobacter_sp._PS-1	0	0	0	9.92969e-08	0	0	0	0	9.62391e-08	0	1.88415e-07	0	0	2.54694e-07	0	0	0	0	0	0	0	0	3.87565e-07	0
Acinetobacter_sp._Q66-1	0	0	0	0	0	3.20247e-08	0	1.38821e-07	3.53128e-07	1.60381e-07	1.02372e-07	3.41581e-07	2.75103e-07	6.60925e-07	0	1.51365e-07	1.21238e-07	4.43175e-07	2.82336e-07	3.6998e-07	1.63284e-07	1.50085e-06	4.47948e-07	7.96726e-08
Acinetobacter_sp._RIFCSPHIGHO2_12_41_5	0	0	0	0	5.00398e-07	0	0	0	0	0	0	0	0	8.48979e-08	1.79663e-07	3.50837e-07	0	0	0	0	0	0	0	0
Acinetobacter_sp._RIT698	0	0	0	0	0	9.76957e-08	1.97403e-07	0	9.74573e-08	0	0	0	0	0	0	5.54112e-07	0	0	0	0	0	0	0	0
Acinetobacter_sp._Root1280	0	0	0	0	0	0	0	0	0	0	0	0	0	0	0	0	0	0	0	0	0	4.98787e-07	0	0
Acinetobacter_sp._SFA	5.98642e-08	0	5.10701e-08	5.44093e-08	1.39837e-07	5.28627e-08	0	5.13881e-08	0	3.20291e-07	0	0	4.79732e-08	5.39625e-08	2.62013e-07	9.99426e-08	1.33417e-07	7.72847e-08	0	1.43299e-07	8.1539e-08	5.72239e-08	0	0
Acinetobacter_sp._SFB	2.54989e-07	3.09008e-07	1.49125e-07	5.17522e-07	0	0	1.55948e-07	0	1.47626e-07	2.20942e-07	7.5366e-08	2.09273e-07	7.28474e-07	1.35837e-07	1.31863e-07	0	2.92183e-07	1.12836e-07	0	1.91942e-07	9.86113e-07	2.01509e-07	3.86803e-07	5.2847e-07
Acinetobacter_sp._SFD	0	0	0	1.90425e-07	2.6056e-07	0	0	2.00071e-07	0	0	4.43329e-07	0	0	0	2.11369e-07	0	0	1.65935e-07	0	0	0	3.34188e-07	0	0
Acinetobacter_sp._SM1B	2.27018e-07	0	0	0	8.83819e-08	0	3.03795e-07	0	1.99977e-07	0	0	0	0	2.64617e-07	0	8.79013e-08	6.3243e-07	1.4654e-07	0	5.04136e-07	4.58432e-07	0	0	0
Acinetobacter_sp._Swhac1	0	1.46075e-07	0	7.35533e-08	0	1.80443e-07	0	0	2.13865e-07	1.44329e-07	0	0	0	0	0	0	9.01798e-08	0	0	9.68595e-08	0	0	2.90524e-07	0
Acinetobacter_sp._SwsAc3	0	0	0	1.18564e-07	3.0472e-07	3.4558e-07	0	0	0	0	0	0	0	0	0	0	0	0	0	0	0	0	0	0
Acinetobacter_sp._SwsAc7	0	0	3.38117e-07	0	1.38886e-07	0	1.59131e-07	2.29674e-07	0	0	0	3.55907e-07	4.28822e-07	0	0	0	0	1.15138e-07	0	0	0	0	0	0
Acinetobacter_sp._TUM15071	0	0	0	0	0	0	0	0	0	0	0	0	0	0	0	0	0	0	3.60464e-07	0	0	0	0	0
Acinetobacter_sp._VT_511	4.52299e-07	2.58514e-07	1.15991e-06	4.68774e-07	5.64024e-07	3.83986e-07	2.56465e-07	7.0254e-07	7.51322e-07	2.68684e-07	4.27026e-07	3.07902e-07	6.5232e-07	7.86211e-07	3.62946e-07	7.39898e-07	4.21392e-07	8.39303e-07	5.40409e-08	0	7.89946e-07	7.16463e-07	0	9.18713e-08
Acinetobacter_sp._Ver3	4.48214e-07	2.02257e-07	0	1.01843e-07	2.61747e-07	0	1.99934e-07	0	0	0	0	0	8.9796e-08	2.61224e-07	9.2135e-08	0	0	0	0	0	0	0	0	0
Acinetobacter_sp._WCHA29	0	0	0	0	0	2.00466e-07	0	0	2.99966e-07	0	0	0	0	0	0	1.89502e-07	0	0	0	0	0	0	0	0
Acinetobacter_sp._WCHA45	8.65364e-08	0	2.40524e-07	0	0	0	0	0	0	7.71659e-08	0	0	1.50626e-07	0	2.84615e-07	0	0	0	8.9843e-07	0	1.89781e-07	0	0	0
Acinetobacter_sp._WCHA55	2.24107e-07	0	0	0	0	1.00233e-07	0	0	0	0	4.8939e-07	0	0	0	0	0	3.74593e-07	0	1.46682e-07	0	1.14608e-07	4.3401e-07	0	0
Acinetobacter_sp._WCHAc010052	2.53339e-07	3.52144e-07	4.79512e-07	5.83172e-07	1.21525e-07	0	5.56958e-07	7.64784e-07	2.10935e-07	1.12953e-07	2.18452e-07	1.01098e-07	6.95152e-07	0	1.04153e-07	5.80606e-07	2.82302e-07	0	1.88444e-07	4.54819e-07	0	0	0	0
Acinetobacter_sp._WCHAc060025	0	0	0	0	0	0	0	0	0	0	0	0	0	0	0	0	0	5.64179e-07	0	0	3.57763e-07	0	0	0
Acinetobacter_sp._WCHAc060041	0	0	0	0	0	0	0	0	0	0	0	0	6.7347e-08	6.53061e-08	0	7.0152e-08	0	0	0	1.75621e-07	5.35185e-07	6.29523e-07	1.78477e-07	0
Acinetobacter_sp._WCHAc060042	5.14128e-07	0	0	1.1682e-07	0	4.82372e-07	0	0	0	0	0	0	0	0	0	0	1.3527e-07	0	0	4.35868e-07	0	3.68589e-07	1.20217e-07	0
Acinetobacter_sp._WCHAc060115	0	0	0	0	0	8.21059e-08	0	0	1.63811e-07	0	6.41413e-07	0	0	0	0	2.75314e-07	0	0	0	0	0	0	0	0
Acinetobacter_sp._YH01006	4.92404e-07	0	0	1.11884e-07	0	0	2.19645e-07	1.05671e-07	0	0	0	0	0	0	0	0	0	0	0	0	0	0	3.6573e-07	0
Acinetobacter_sp._YH01015	1.28532e-07	1.16e-07	1.09651e-07	0	1.0008e-07	0	0	2.20667e-07	6.1593e-08	1.98418e-07	6.40789e-07	5.12925e-08	5.77717e-07	5.63989e-07	0	3.99495e-07	2.51315e-07	6.48481e-07	7.04908e-07	4.01317e-07	1.89781e-07	1.52158e-06	1.80707e-06	4.94146e-07
Acinetobacter_sp._YH01021	2.33071e-07	1.05174e-07	1.98833e-07	1.05917e-07	0	0	0	0	0	2.07833e-07	1.00488e-07	3.72041e-07	3.73552e-07	0	0	0	0	3.00895e-07	0	0	0	0	0	0
Acinetobacter_sp._YH01026	0	0	0	0	0	0	0	0	1.11582e-07	4.51812e-07	2.18452e-07	1.01098e-07	0	0	0	2.11473e-07	0	0	0	0	0	0	0	0
Acinetobacter_sp._YH12027	0	0	0	0	4.72598e-07	0	0	0	0	0	0	0	0	0	0	0	0	0	0	0	0	0	0	0
Acinetobacter_sp._YH12043	0	0	0	0	0	0	0	0	1.63811e-07	0	5.61236e-07	1.48421e-07	0	0	0	0	0	0	0	0	9.38811e-08	0	0	0
Acinetobacter_sp._YH12049	0	0	0	0	0	0	0	0	0	0	0	0	0	8.28273e-08	6.13485e-07	0	0	0	0	0	0	0	0	0
Acinetobacter_sp._YH12066	0	0	3.95406e-07	0	0	0	0	0	0	0	0	0	0	0	0	0	0	0	0	0	0	0	0	0
Acinetobacter_sp._YH12079	0	0	0	0	0	0	0	0	1.62087e-07	0	0	9.42672e-08	0	1.83563e-07	0	0	0	0	0	2.51477e-07	9.28929e-08	6.02536e-07	1.82224e-07	0
Acinetobacter_sp._YH12086	6.67189e-08	1.80642e-07	0	0	0	0	0	0	0	0	0	0	0	0	0	0	0	8.61341e-08	0	0	1.3473e-07	1.66647e-07	1.32147e-07	4.88822e-07
Acinetobacter_sp._YH12089	0	0	0	0	0	0	0	0	0	4.17294e-07	5.34511e-08	7.12269e-07	3.18368e-07	5.333e-07	3.75783e-07	0	1.10675e-07	4.21302e-07	1.5472e-07	7.09051e-07	2.25457e-07	2.24378e-07	4.55802e-07	7.49753e-07
Acinetobacter_sp._YH12091	0	0	2.89563e-07	0	5.00398e-08	7.79592e-08	0	6.45028e-07	0	4.15758e-07	0	2.7574e-07	8.54157e-08	9.17297e-07	4.11147e-07	1.25881e-07	3.72573e-07	6.40363e-07	0	9.97055e-07	2.35329e-07	2.78022e-06	1.425e-06	6.3019e-07
Acinetobacter_sp._YH12096	0	0	0	0	0	0	1.64156e-07	0	0	0	0	1.46858e-07	4.61808e-07	1.49271e-07	0	1.53596e-07	0	0	0	1.10114e-07	3.75655e-07	1.75888e-07	1.90233e-07	0
Acinetobacter_sp._YH12100	0	3.67152e-07	0	0	0	0	0	0	0	0	0	0	0	0	0	0	0	0	0	0	0	0	0	0
Acinetobacter_sp._YH12105	0	0	0	0	0	0	0	0	0	0	0	0	1.01509e-07	0	1.04153e-07	0	0	0	0	0	0	3.63247e-07	0	0
Acinetobacter_sp._YH12119	0	0	0	0	0	0	0	0	0	0	0	0	0	0	0	0	9.36482e-08	0	0	4.0234e-07	8.48541e-08	0	8.32271e-08	0
Acinetobacter_sp._YH12128	0	0	0	0	7.08897e-08	4.01977e-07	3.188e-07	1.56306e-07	0	0	0	0	0	0	0	0	0	0	0	0	0	0	0	0
Acinetobacter_sp._YH12218	0	0	0	0	0	0	0	0	0	0	0	0	0	0	0	3.94368e-07	0	0	0	0	0	0	0	0
Acinetobacter_sp._YH12227	0	0	0	0	0	0	0	0	0	4.38068e-07	0	3.82234e-07	4.43297e-07	4.29863e-07	1.07262e-07	0	2.78781e-07	1.63419e-06	4.9187e-07	4.0813e-07	2.57783e-07	4.41963e-07	1.29188e-07	0
Acinetobacter_sp._YH12230	0	0	0	0	0	0	0	0	0	1.01218e-07	0	9.05945e-08	0	4.70844e-07	0	0	0	1.4654e-07	1.59078e-07	1.35855e-07	0	7.77856e-07	0	4.05657e-07
Acinetobacter_sp._YH12239	0	9.39051e-08	0	9.45685e-08	0	0	9.28263e-08	0	3.66625e-07	3.71131e-07	2.69164e-07	0	0	8.08552e-08	0	0	0	0	0	0	0	0	0	1.14292e-07
Acinetobacter_sp._YH16031	1.64586e-07	0	0	0	0	3.26111e-07	0	0	1.08438e-07	3.29313e-07	0	0	0	1.91319e-07	2.02438e-07	0	0	1.45415e-07	2.96522e-07	1.47336e-07	1.24293e-07	2.35343e-07	0	0
Acinetobacter_sp._YH16032	0	3.38058e-07	0	0	0	0	0	0	0	0	0	0	0	0	0	0	0	0	0	0	2.34488e-08	1.19353e-07	0	0
Acinetobacter_sp._YH16044	0	0	0	0	0	0	0	4.00142e-07	0	0	0	0	0	0	0	0	0	0	0	0	0	0	0	0
Acinetobacter_sp._YH16052	0	0	0	0	0	0	0	0	0	1.71291e-07	8.28198e-08	0	4.61808e-07	0	0	0	0	0	0	0	0	0	0	0
Acinetobacter_sp._YH16053	0	3.05356e-07	0	1.63789e-07	0	3.93143e-07	0	0	6.58045e-08	0	6.44154e-08	2.9811e-07	0	1.161e-07	6.14234e-08	0	6.65943e-07	0	9.65346e-08	2.68226e-07	0	0	1.47959e-07	0
Acinetobacter_sp._YH16057	0	0	0	0	0	3.08718e-07	0	1.00036e-07	2.0531e-07	0	0	0	0	0	0	0	0	0	0	0	0	0	0	0
Acinetobacter_sp._YH1901134	3.60668e-08	1.83443e-07	6.06903e-07	0	1.72334e-06	3.42489e-07	4.29019e-08	9.28804e-08	1.7905e-07	2.71875e-07	0	0	0	0	0	0	0	4.37268e-06	0	0	0	0	0	1.32057e-08
Acinetobacter_sp._YK3	1.21391e-07	2.7389e-07	5.36435e-08	0	5.50104e-08	5.35969e-08	1.62446e-07	2.08407e-07	0	0	1.96946e-07	0	0	0	4.99065e-08	0	0	0	0	1.45289e-07	0	0	0	0
Acinetobacter_sp._neg1	0	0	0	0	2.72216e-07	0	0	0	0	0	0	0	0	0	0	0	0	0	0	0	0	0	0	0
Acinetobacter_tandoii	2.9869e-07	5.02694e-07	5.68094e-07	6.30149e-07	1.87305e-07	5.821e-07	3.96428e-07	4.71666e-07	5.81219e-07	7.8593e-07	6.91431e-08	3.18999e-07	5.52116e-07	1.77299e-07	3.06509e-07	4.60605e-07	1.06186e-06	2.13089e-07	3.06615e-07	3.6777e-07	8.09617e-08	3.78414e-07	7.94093e-08	6.63532e-07
Acinetobacter_tjernbergiae	1.39006e-06	6.25184e-07	3.43941e-07	8.30617e-07	9.78469e-07	6.36232e-07	1.02576e-06	9.42076e-07	5.80153e-07	6.36606e-07	1.10379e-06	6.98453e-07	3.79346e-07	1.34964e-06	7.43217e-07	7.68103e-08	3.70487e-07	4.45385e-07	9.2654e-07	1.21338e-06	5.09437e-07	1.01476e-06	9.78708e-07	1.668e-06
Acinetobacter_towneri	9.29806e-08	9.17213e-08	2.70679e-07	4.94508e-07	3.05006e-07	2.9876e-07	0	2.61721e-07	3.16403e-07	1.06764e-07	0	0	0	4.05483e-07	0	9.99426e-08	4.0025e-07	9.27417e-07	1.5472e-07	2.86598e-07	0	5.42196e-07	0	0
Acinetobacter_ursingii	2.33071e-07	7.58631e-07	7.93216e-08	6.96162e-07	4.6344e-07	7.95666e-08	1.79532e-07	7.96214e-07	6.21656e-07	5.90167e-07	4.43329e-07	1.65572e-07	5.03926e-07	2.88429e-07	6.45309e-07	3.23066e-07	3.07797e-07	6.88304e-07	6.3883e-07	8.03912e-07	5.74479e-07	2.71011e-07	6.04225e-07	1.0924e-06
Acinetobacter_variabilis	4.16393e-07	8.70766e-08	1.25034e-07	3.1586e-07	3.40814e-07	8.72006e-08	2.6147e-07	7.1855e-08	0	0	2.96942e-07	0	0	0	0	0	0	0	0	0	0	0	0	2.74301e-07
Acinetobacter_venetianus	9.50019e-08	1.71479e-07	0	8.63452e-08	7.39718e-08	2.51673e-07	6.78036e-07	8.15507e-08	1.38e-07	9.86551e-08	1.908e-07	0	1.52263e-07	0	3.26214e-07	2.13333e-08	0	0	0	0	0	0	0	0
Acinetobacter_virus_IMEAB3	8.09276e-08	7.30373e-08	0	5.14873e-07	0	7.14626e-08	7.21983e-08	1.38938e-07	0	0	0	0	0	0	0	0	0	0	0	0	0	0	0	0
Acinetobacter_virus_LZ35	1.73073e-07	0	0	7.8651e-08	1.34761e-07	0	0	0	0	0	0	0	0	2.01738e-07	1.42308e-07	0	0	0	0	0	0	0	0	0
Acinetobacter_wuhouensis	2.15807e-07	9.73831e-08	0	0	0	1.90567e-07	0	0	3.01684e-07	9.62192e-08	8.25003e-07	3.5442e-07	8.9796e-08	2.80715e-07	2.66168e-07	0	6.93147e-07	0	0	1.29146e-07	0	3.134e-07	0	0
Acremonium_chrysogenum	2.36221e-07	2.95801e-07	2.83148e-07	0	0	0	7.81492e-07	0	0	3.15963e-07	5.63766e-07	2.61592e-07	1.75102e-07	0	2.69495e-07	3.01199e-07	0	4.63708e-07	0	0	0	0	0	0
Acrocarpospora_corrugata	2.29455e-05	2.26049e-05	2.31796e-05	2.05957e-05	2.79478e-05	2.31916e-05	2.16346e-05	2.46303e-05	2.69834e-05	2.56844e-05	3.57653e-05	2.5088e-05	2.53769e-05	2.35775e-05	2.21234e-05	2.58228e-05	2.63088e-05	2.3929e-05	1.64124e-05	2.3769e-05	2.80213e-05	2.47409e-05	2.68812e-05	2.60708e-05
Acrocarpospora_macrocephala	2.76783e-05	3.24467e-05	2.82928e-05	2.90526e-05	2.81814e-05	3.32756e-05	2.9837e-05	3.40605e-05	2.87638e-05	2.85773e-05	3.38539e-05	2.80375e-05	2.31078e-05	2.06879e-05	2.74932e-05	2.92077e-05	2.79887e-05	3.22538e-05	2.33765e-05	2.51097e-05	2.78152e-05	1.83498e-05	2.72719e-05	2.45104e-05
Acrocarpospora_pleiomorpha	1.91391e-05	1.75788e-05	1.85385e-05	2.09962e-05	2.06977e-05	2.32846e-05	2.00795e-05	2.31669e-05	1.72709e-05	1.90525e-05	2.17022e-05	1.88426e-05	2.10744e-05	1.79005e-05	1.87128e-05	1.93289e-05	9.55526e-06	2.18612e-05	1.04445e-05	1.30187e-05	1.55088e-05	1.06594e-05	1.84766e-05	1.18197e-05
Actibacterium_atlanticum	7.92241e-07	1.08907e-06	1.30202e-06	1.82505e-06	1.37176e-06	6.69601e-07	1.30393e-06	5.73929e-07	1.67138e-06	1.42684e-06	1.07543e-06	1.19786e-06	7.26665e-07	8.69274e-07	1.14236e-06	1.06749e-06	4.57225e-07	1.33058e-06	5.92206e-07	7.47451e-07	1.03016e-06	1.09453e-06	8.95785e-07	1.49457e-06
Actibacterium_mucosum	1.63878e-07	2.86508e-07	2.55799e-07	9.8498e-07	7.08037e-07	4.29017e-07	2.56985e-07	8.25889e-07	0	4.93607e-07	6.84204e-07	3.62499e-07	6.87464e-07	1.29539e-06	5.1112e-07	1.89215e-06	0	1.39303e-07	7.89964e-07	4.24088e-07	8.57969e-07	0	0	4.17415e-07
Actibacterium_pelagium	1.22568e-06	4.69196e-07	1.1749e-06	7.72281e-07	6.40209e-07	4.26253e-07	0	3.3594e-07	7.6229e-08	1.11339e-07	2.57189e-07	4.89051e-07	5.94913e-07	1.54977e-06	8.97695e-07	3.26678e-07	1.51895e-06	5.87871e-07	7.32492e-07	1.23167e-06	1.74749e-07	7.45043e-07	3.00156e-07	6.8689e-07
Actibacterium_ureilyticum	6.18701e-07	7.22485e-07	4.12984e-07	6.77161e-07	4.70335e-07	2.70806e-07	1.36797e-07	6.50607e-07	8.91912e-07	1.14614e-07	1.15019e-06	5.92501e-07	6.69698e-07	1.54e-07	4.66562e-07	2.60091e-07	2.86453e-07	1.2633e-06	1.32877e-07	3.07672e-07	1.61923e-07	6.89261e-07	2.34745e-07	4.5995e-07
Actinoallomurus_bryophytorum	3.9948e-05	4.92748e-05	5.56528e-05	4.29315e-05	6.45373e-05	6.66945e-05	7.86145e-05	7.33921e-05	3.25382e-05	6.12788e-05	0.00024303	3.4973e-05	5.7741e-05	4.6511e-05	3.82819e-05	5.29231e-05	2.47398e-05	3.36398e-05	2.62932e-05	3.72045e-05	3.88614e-05	1.90965e-05	0.000477385	2.80573e-05
Actinoallomurus_fulvus	0	2.32001e-07	0	0	0	0	0	0	0	0	4.49946e-07	0	0	0	0	0	0	0	3.32192e-07	0	7.78661e-07	0	5.21041e-06	0
Actinoallomurus_sp.	1.94226e-07	1.7529e-07	0	6.27573e-07	1.87328e-07	8.57551e-08	2.59914e-07	8.3363e-08	0	0	4.43329e-07	0	0	7.54648e-08	0	0	0	0	0	0	0	0	0	0
Actinoallomurus_sp._ID145698	0	0	0	0	2.34669e-07	0	0	0	0	0	0	0	0	0	0	8.38599e-08	1.11947e-07	0	0	0	1.01435e-07	3.84124e-07	0	1.10351e-07
Actinoallomurus_spadix	0	1.05174e-07	0	1.05917e-07	2.93177e-07	1.02906e-07	0	2.00071e-07	1.02655e-07	1.03917e-07	0	0	0	0	0	0	0	0	0	0	0	0	0	0
Actinoalloteichus_cyanogriseus	9.44774e-07	8.42963e-07	2.58775e-07	1.16341e-06	9.07261e-07	1.38731e-06	1.03796e-06	1.1828e-06	1.46469e-06	1.10745e-06	1.10276e-06	4.24803e-07	1.39538e-06	5.83503e-07	8.33771e-07	8.83419e-07	8.78801e-07	1.98288e-06	8.65901e-07	1.23703e-06	1.46379e-06	1.95665e-06	1.24416e-06	1.24084e-06
Actinoalloteichus_fjordicus	8.29746e-07	7.35641e-07	7.81351e-07	9.23716e-07	4.77198e-07	4.11723e-07	7.07351e-07	6.35998e-07	1.75741e-07	2.94764e-07	7.04354e-07	7.75086e-08	3.30749e-07	9.84324e-08	2.72906e-07	1.3569e-06	7.81035e-07	3.2706e-07	5.74299e-07	2.03405e-07	8.2192e-07	2.45726e-07	1.03823e-06	9.30622e-07
Actinoalloteichus_hoggarensis	3.22309e-06	1.36328e-06	2.0199e-06	1.66413e-06	1.99159e-06	2.04236e-06	2.93397e-06	2.95087e-06	1.55147e-06	2.10338e-06	1.28965e-06	2.12652e-06	2.1506e-06	2.68352e-06	2.02639e-06	2.34445e-06	1.11768e-06	2.99231e-07	1.42885e-06	2.43182e-06	2.38735e-06	1.64943e-06	2.78452e-06	1.76236e-06
Actinoalloteichus_hymeniacidonis	1.90768e-06	2.51299e-06	5.58371e-06	2.40098e-06	1.94306e-06	5.93362e-06	2.05334e-06	1.87637e-06	3.65369e-06	1.82007e-06	2.10877e-06	1.59499e-06	2.44126e-06	3.58327e-06	1.37235e-06	2.7164e-06	3.92322e-06	1.13052e-06	2.53163e-06	1.73076e-06	2.9626e-06	9.80413e-07	2.24002e-06	4.59199e-06
Actinoalloteichus_sp._AHMU_CJ021	3.00244e-06	1.5598e-06	3.95034e-06	1.79044e-06	9.34429e-07	2.08697e-06	1.41629e-06	2.07614e-06	2.66886e-06	8.67454e-07	1.93477e-06	2.68457e-06	1.79829e-06	1.84533e-06	1.08395e-06	2.20729e-06	1.89156e-06	7.03398e-07	5.46999e-07	1.3348e-06	1.72753e-06	1.54153e-06	1.55141e-06	2.33249e-06
Actinoalloteichus_sp._GBA129-24	1.61996e-06	2.22559e-06	3.63462e-06	3.81839e-06	3.12935e-06	2.62415e-06	4.29085e-06	2.98012e-06	1.54687e-06	1.36333e-06	2.11153e-06	1.70229e-06	3.97072e-06	3.12847e-06	1.34011e-06	2.89366e-06	1.04791e-06	2.65428e-06	3.78381e-06	1.28891e-06	1.64917e-06	1.05812e-06	3.31021e-06	3.33964e-06
Actinoalloteichus_spitiensis	2.09635e-06	1.91286e-06	2.38975e-06	2.16907e-06	1.24207e-06	2.01502e-06	3.1309e-06	1.2647e-06	1.85395e-06	1.12971e-06	1.47898e-06	5.21652e-07	2.10637e-06	1.27281e-06	2.15331e-06	2.9019e-06	1.35046e-06	1.11593e-06	1.26367e-06	7.57e-07	1.76952e-06	1.04894e-06	1.88614e-06	9.02342e-07
Actinobacillus_delphinicola	0	0	0	0	0	0	0	8.82667e-08	0	0	0	0	0	3.19616e-07	0	1.71666e-07	0	0	4.91067e-07	0	0	0	0	0
Actinobacillus_indolicus	0	0	0	0	0	0	0	0	0	0	0	0	0	0	0	5.55871e-07	0	0	0	0	5.65694e-07	0	0	0
Actinobacillus_minor	0	5.40276e-07	0	0	9.72201e-08	1.10257e-07	0	3.21543e-07	0	0	3.14148e-07	0	0	0	2.0533e-07	0	0	0	0	0	1.20888e-07	1.14448e-07	0	0
Actinobacillus_pleuropneumoniae	7.3692e-07	1.52019e-06	4.82136e-07	1.10249e-06	1.37754e-06	6.05235e-07	4.23817e-07	7.72605e-07	8.2037e-07	4.2707e-07	3.19164e-07	2.72565e-07	1.59996e-06	1.28759e-06	9.19434e-07	5.74872e-07	4.11079e-07	1.34328e-07	7.33412e-08	0	2.67419e-07	1.53712e-07	2.71659e-07	3.32088e-07
Actinobacillus_porcinus	3.71315e-07	0	8.65021e-07	3.3748e-07	9.45196e-08	1.13499e-07	3.44003e-07	0	0	3.15963e-07	3.14025e-07	1.02585e-07	1.03001e-07	0	5.10808e-07	0	0	1.56716e-07	0	0	0	0	0	2.66682e-07
Actinobacillus_seminis	0	0	0	0	0	0	0	0	0	0	0	0	0	0	0	0	0	4.33984e-07	0	0	8.48541e-08	5.30603e-07	0	0
Actinobacillus_succinogenes	7.28348e-08	2.84846e-07	0	2.52942e-07	2.26847e-07	1.28633e-07	1.90755e-07	1.25044e-07	5.68269e-07	0	0	0	0	5.09388e-07	6.99717e-07	1.21597e-07	0	0	0	1.45289e-06	2.20621e-07	0	1.4426e-07	0
Actinobacillus_ureae	0	0	0	0	0	0	0	0	0	0	0	0	0	0	0	0	0	0	4.70606e-07	0	0	0	0	0
Actinobacillus_vicugnae	0	0	0	0	8.95449e-08	0	1.02598e-07	0	0	3.07648e-07	0	0	0	0	0	1.45436e-07	0	0	0	0	0	0	0	0
Actinobacteria_bacterium	0.0190382	0.0229042	0.0181269	0.0207249	0.0263419	0.0272322	0.0264737	0.0267335	0.0219843	0.0228774	0.0209561	0.0204373	0.0217996	0.0216625	0.0224982	0.0220637	0.0201846	0.0184679	0.0242012	0.0178628	0.0147192	0.0130469	0.0157018	0.016028
Actinobacteria_bacterium_13_1_20CM_2_65_11	2.81008e-05	2.00172e-05	1.57983e-05	2.1899e-05	1.46179e-05	2.15828e-05	1.7037e-05	1.23556e-05	1.9126e-05	2.10882e-05	2.29451e-05	1.99135e-05	2.26874e-05	1.62503e-05	2.38382e-05	2.18948e-05	2.0924e-05	2.23406e-05	2.12315e-05	2.00665e-05	1.99645e-05	1.85975e-05	1.99834e-05	2.05109e-05
Actinobacteria_bacterium_13_1_20CM_2_66_18	5.74186e-07	1.44749e-06	6.09247e-07	1.17354e-06	1.82442e-06	8.8007e-07	1.08079e-06	8.18343e-07	5.22492e-07	1.47641e-06	6.86451e-07	1.19272e-06	8.4701e-07	8.36105e-07	5.00214e-07	1.18242e-06	3.54863e-07	7.34405e-07	0	2.25751e-07	5.50319e-07	4.0333e-07	8.29132e-07	6.73297e-07
Actinobacteria_bacterium_13_1_20CM_3_68_10	1.92791e-05	2.30263e-05	2.01806e-05	1.97354e-05	1.99342e-05	2.35913e-05	2.32027e-05	2.4763e-05	1.70166e-05	2.02462e-05	2.14627e-05	1.73262e-05	2.32979e-05	2.29771e-05	2.10823e-05	2.30949e-05	1.18165e-05	1.1068e-05	1.1323e-05	8.47493e-06	1.33742e-05	1.19722e-05	1.71441e-05	1.78865e-05
Actinobacteria_bacterium_13_1_20CM_3_68_9	1.49273e-05	2.05956e-05	2.6592e-05	2.33034e-05	3.01382e-05	3.6828e-05	3.10825e-05	3.19311e-05	3.32817e-05	3.09817e-05	3.26007e-05	2.89104e-05	3.05215e-05	2.54321e-05	3.10909e-05	2.50838e-05	3.59865e-05	3.00235e-05	5.30645e-05	3.92222e-05	3.44016e-05	2.79138e-05	2.84173e-05	2.76577e-05
Actinobacteria_bacterium_13_1_20CM_3_71_11	0.000102769	9.21563e-05	6.29241e-05	8.16179e-05	0.000107938	9.82039e-05	0.00010573	0.000193029	5.08872e-05	5.69936e-05	0.000108182	4.95201e-05	7.63356e-05	7.56426e-05	6.47917e-05	8.9611e-05	3.36205e-05	3.85922e-05	3.19114e-05	2.72683e-05	6.35883e-05	3.0076e-05	4.70698e-05	4.56049e-05
Actinobacteria_bacterium_13_1_20CM_4_66_15	0	0	2.25947e-07	0	0	0	0	2.88564e-07	0	9.99199e-08	4.34195e-07	3.10034e-07	1.55646e-07	0	0	0	3.84451e-07	0	7.5357e-07	0	0	8.43908e-08	0	0
Actinobacteria_bacterium_13_1_20CM_4_68_12	2.8434e-05	3.63657e-05	2.5327e-05	3.47894e-05	3.1017e-05	3.62723e-05	3.86523e-05	3.5687e-05	2.62772e-05	3.0242e-05	3.04966e-05	2.88353e-05	3.7957e-05	3.23979e-05	3.4768e-05	3.21594e-05	1.78281e-05	1.46839e-05	1.09268e-05	1.50085e-05	2.16718e-05	1.96709e-05	1.87777e-05	2.60501e-05
Actinobacteria_bacterium_13_1_20CM_4_69_9	8.584e-05	0.000107391	9.11059e-05	0.0001007	0.000109804	0.000110379	0.000123294	0.000113366	0.000110048	0.000114012	0.000106687	0.000103962	0.000118718	0.000106071	0.000123117	0.000106957	6.04652e-05	4.06882e-05	4.85916e-05	4.9898e-05	7.51787e-05	6.93488e-05	8.9871e-05	8.20179e-05
Actinobacteria_bacterium_13_1_40CM_2_65_8	6.77037e-06	5.63892e-06	3.68346e-06	5.95722e-06	5.23371e-06	5.59762e-06	3.50762e-06	4.71582e-06	5.88957e-06	6.29661e-06	6.38962e-06	5.59784e-06	5.46765e-06	7.35255e-06	5.78381e-06	4.75258e-06	4.60506e-06	5.69255e-06	2.22112e-06	3.13026e-06	5.87303e-06	5.33212e-06	5.24754e-06	6.30304e-06
Actinobacteria_bacterium_13_1_40CM_2_66_13	1.00459e-06	1.54083e-06	7.01026e-07	2.0042e-06	1.31485e-06	1.37416e-06	8.54622e-07	6.07198e-07	1.95039e-06	3.2619e-06	2.09862e-06	2.1435e-06	1.68052e-06	1.48944e-06	2.31575e-06	1.93733e-06	5.51519e-07	1.42081e-06	1.0831e-06	5.93782e-07	2.77573e-07	3.2996e-07	4.381e-07	3.04225e-07
Actinobacteria_bacterium_13_1_40CM_3_66_19	0	1.21354e-07	1.14711e-07	3.87423e-07	0	0	5.99801e-08	0	0	1.79856e-07	0	1.0732e-07	3.61036e-07	1.92283e-07	0	5.44463e-07	0	0	5.05726e-07	0	0	6.42668e-08	6.65817e-08	7.38504e-08
Actinobacteria_bacterium_13_1_40CM_4_65_12	4.67093e-05	3.01448e-05	3.55122e-05	3.44695e-05	2.49347e-05	2.89155e-05	2.62281e-05	2.37916e-05	3.24038e-05	2.90267e-05	3.6738e-05	3.32687e-05	3.3743e-05	3.21059e-05	3.64819e-05	3.49158e-05	3.0751e-05	2.34139e-05	2.53389e-05	2.52543e-05	3.79431e-05	3.01267e-05	3.00073e-05	2.4311e-05
Actinobacteria_bacterium_13_1_40CM_66_12	5.9065e-07	1.08903e-06	1.06254e-06	1.67353e-06	5.38691e-07	6.86782e-07	3.91953e-07	1.31853e-06	1.1149e-06	9.37869e-07	3.4677e-07	5.80147e-07	4.46988e-07	7.57555e-07	8.91507e-07	6.88876e-07	1.0422e-06	8.24569e-07	4.17182e-07	9.67628e-07	1.28139e-06	6.30266e-07	1.70893e-07	1.71528e-06
Actinobacteria_bacterium_13_2_20CM_2_66_6	2.00154e-05	3.05862e-05	2.52838e-05	2.84193e-05	2.54538e-05	2.54581e-05	2.40607e-05	2.83876e-05	2.36735e-05	2.50016e-05	2.33137e-05	2.71138e-05	2.96817e-05	2.52707e-05	2.19231e-05	2.71027e-05	2.20236e-05	1.86175e-05	2.38296e-05	2.35779e-05	1.81257e-05	1.98237e-05	2.1526e-05	2.10428e-05
Actinobacteria_bacterium_13_2_20CM_2_71_6	0.000142281	0.000134928	0.000103459	0.000108231	0.000150882	0.000126599	0.000137031	0.00023648	7.03069e-05	8.6069e-05	0.000139884	6.13017e-05	0.000115134	9.4966e-05	9.999e-05	0.000115001	4.93953e-05	6.51912e-05	5.27307e-05	4.53687e-05	8.17811e-05	4.0504e-05	8.27563e-05	6.71052e-05
Actinobacteria_bacterium_13_2_20CM_2_72_6	5.93493e-05	5.15972e-05	3.38406e-05	5.07211e-05	7.06146e-05	5.58255e-05	5.85034e-05	0.000100585	2.74192e-05	3.24013e-05	6.50844e-05	2.6254e-05	4.35006e-05	4.31308e-05	4.10477e-05	4.95159e-05	1.85255e-05	2.00084e-05	1.79573e-05	1.66305e-05	4.3478e-05	1.66577e-05	3.24364e-05	2.09559e-05
Actinobacteria_bacterium_13_2_20CM_68_14	2.752e-05	3.57106e-05	2.50774e-05	3.15016e-05	3.51314e-05	3.71049e-05	3.33296e-05	3.98287e-05	2.83395e-05	2.61528e-05	2.17161e-05	2.47533e-05	2.44332e-05	2.69416e-05	3.16623e-05	2.90925e-05	1.18655e-05	1.0264e-05	1.2443e-05	1.54862e-05	2.00935e-05	1.45119e-05	1.83129e-05	1.80561e-05
Actinobacteria_bacterium_21-64-8	3.54557e-06	3.77793e-06	4.027e-06	5.77851e-06	6.53512e-06	5.6341e-06	5.22395e-06	6.51957e-06	3.94503e-06	4.38285e-06	2.7142e-06	4.83924e-06	6.97105e-06	4.38226e-06	5.04489e-06	3.83788e-06	5.92935e-06	4.62678e-06	2.15284e-06	4.16053e-06	3.71039e-06	2.10524e-06	2.45642e-06	4.36094e-06
Actinobacteria_bacterium_21-73-9	3.41432e-06	5.45821e-06	1.86869e-06	3.70709e-06	7.3927e-06	5.78476e-06	7.3795e-06	6.39491e-06	5.35701e-06	4.65508e-06	4.61167e-06	5.16388e-06	5.63142e-06	5.81411e-06	5.22904e-06	5.70779e-06	8.42654e-06	6.54031e-06	1.59644e-05	8.06225e-06	2.74592e-06	2.46477e-06	2.24719e-06	3.62418e-06
Actinobacteria_bacterium_66_15	4.62221e-07	1.10296e-06	1.26021e-06	1.90974e-06	1.57507e-06	2.45739e-06	1.86826e-06	1.44157e-06	4.54949e-07	1.61121e-07	3.56969e-07	8.49246e-07	3.6623e-07	1.32871e-06	1.64396e-06	1.37171e-06	4.68241e-08	4.1791e-07	8.43121e-07	3.03213e-07	1.15856e-06	7.31466e-07	6.09786e-07	8.8894e-08
Actinobacteria_bacterium_69-20	1.01308e-05	1.64861e-05	1.1508e-05	1.73671e-05	2.14266e-05	2.4421e-05	2.30169e-05	2.92609e-05	1.35613e-05	1.58579e-05	1.35284e-05	1.51566e-05	1.67188e-05	2.24321e-05	2.14922e-05	2.03948e-05	1.0636e-05	1.00847e-05	9.04121e-06	7.14167e-06	1.6748e-05	1.37343e-05	2.17397e-05	1.36367e-05
Actinobacteria_bacterium_ADurb.Bin444	4.91388e-06	3.14661e-06	3.29227e-06	4.81938e-06	4.10058e-06	3.43312e-06	4.53775e-06	3.55218e-06	3.14566e-06	3.09354e-06	4.86748e-06	2.22688e-06	5.11689e-06	3.25956e-06	1.86905e-06	2.50655e-06	3.68134e-06	2.49962e-06	2.51489e-06	1.99582e-06	4.46771e-06	2.62776e-06	2.49982e-06	4.46013e-06
Actinobacteria_bacterium_ADurb.BinA094	1.63176e-06	2.57075e-06	2.73026e-06	2.57722e-06	2.1299e-06	4.00746e-06	4.88461e-06	3.47508e-06	2.46843e-06	3.22912e-06	4.85284e-06	1.13026e-06	2.14438e-06	2.47006e-06	3.54917e-06	3.04827e-06	2.0172e-06	3.00219e-06	3.7195e-06	2.25397e-06	2.92171e-06	1.86658e-06	2.26097e-06	1.61803e-06
Actinobacteria_bacterium_BACL15_MAG-120619-bin91	0	0	0	9.92969e-08	0	3.17176e-07	0	9.37834e-08	0	0	1.03241e-07	0	0	0	0	1.99885e-07	0	0	0	0	0	1.04434e-07	0	3.60021e-07
Actinobacteria_bacterium_BACL15_MAG-120823-bin78	0	0	0	0	0	0	0	0	0	1.16325e-07	0	0	0	1.01371e-07	3.67428e-07	6.3357e-07	0	0	0	0	0	0	0	2.86584e-07
Actinobacteria_bacterium_BACL2_MAG-120802-bin41	0	0	0	0	1.76764e-07	0	0	0	0	0	0	0	3.63849e-07	0	0	0	0	0	0	0	0	0	0	0
Actinobacteria_bacterium_BACL2_MAG-120920-bin34	7.40693e-08	6.68477e-08	0	6.732e-08	0	0	0	0	0	6.60487e-08	3.83217e-07	5.91167e-08	5.93567e-08	1.15116e-07	0	1.23658e-07	0	0	0	0	7.47866e-08	2.12407e-07	7.33527e-08	1.62721e-07
Actinobacteria_bacterium_BACL4_MAG-120507-bin0	0	2.72001e-07	0	1.82615e-07	7.82231e-08	0	0	2.58713e-07	0	0	0	0	4.83041e-07	0	8.26038e-08	1.6772e-07	0	0	0	0	1.01435e-07	0	0	1.10351e-07
Actinobacteria_bacterium_BACL4_MAG-121022-bin9	0	0	1.06518e-07	0	9.72201e-08	4.41026e-07	3.34175e-07	2.14362e-07	0	1.11339e-07	1.07666e-07	0	0	0	0	0	0	0	0	0	0	0	0	0
Actinobacteria_bacterium_CG08_land_8_20_14_0_20_35_9	0	0	0	0	0	0	0	0	4.63803e-07	0	0	0	0	0	0	0	0	0	0	0	0	0	0	0
Actinobacteria_bacterium_CG08_land_8_20_14_0_20_50_39	2.33071e-07	4.23576e-07	4.0039e-07	3.1775e-07	0	0	1.03965e-07	1.00036e-07	0	1.06764e-07	3.0697e-07	9.55586e-08	0	0	4.92228e-07	0	1.29859e-07	4.83582e-07	0	5.73196e-07	1.20888e-07	0	1.1857e-07	0
Actinobacteria_bacterium_CG17_big_fil_post_rev_8_21_14_2_50_50_24	1.2486e-07	4.18398e-07	4.68946e-08	4.31113e-07	3.20159e-07	1.21135e-06	9.02959e-07	4.39e-07	1.95287e-07	2.10642e-07	0	6.51481e-07	0	1.13464e-07	2.4668e-07	2.27994e-07	0	0	0	0	0	0	0	0
Actinobacteria_bacterium_CG2_30_50_142	2.27018e-07	7.34982e-07	3.15734e-07	3.09497e-07	0	1.36233e-06	5.24261e-07	8.79343e-07	4.33909e-07	1.06419e-06	2.98688e-07	1.80016e-07	7.5497e-07	1.59985e-07	3.08225e-07	3.63418e-07	6.02066e-07	9.98546e-08	1.1889e-07	1.10114e-07	1.1488e-06	1.28051e-06	5.65727e-07	4.84486e-07
Actinobacteria_bacterium_CG_4_10_14_0_8_um_filter_50_43	0	5.40276e-07	1.03187e-06	2.49201e-07	3.67381e-07	3.78547e-07	2.66027e-07	4.34976e-07	4.1062e-07	1.17536e-06	3.54167e-07	5.36237e-07	8.04712e-07	3.95795e-07	5.84485e-07	4.55489e-07	3.74005e-07	6.09923e-07	1.44511e-06	1.54902e-06	7.79786e-07	1.19904e-06	3.46665e-07	4.47111e-07
Actinobacteria_bacterium_CG_4_10_14_3_um_filter_50_156	9.29806e-08	7.18317e-07	1.0076e-07	9.45685e-08	8.31074e-07	2.96281e-07	2.88583e-07	5.18802e-07	0	0	4.38218e-07	0	4.28178e-07	2.89014e-07	1.2378e-07	1.18212e-07	0	0	1.20155e-07	0	0	0	1.03043e-07	0
Actinobacteria_bacterium_CG_4_8_14_3_um_filter_50_135	0	0	0	4.74254e-07	0	0	0	0	0	0	0	0	0	0	0	0	4.86971e-07	0	0	1.3076e-07	0	0	0	0
Actinobacteria_bacterium_CG_4_9_14_3_um_filter_50_75	1.76747e-06	2.0162e-06	3.503e-06	2.62389e-06	2.2141e-06	3.43469e-06	3.53989e-06	9.89512e-07	1.89367e-06	1.99274e-06	1.68949e-06	2.24242e-06	2.56572e-06	1.70571e-06	2.24204e-06	2.52033e-06	1.65097e-06	9.8494e-07	2.82506e-06	1.41733e-06	1.51483e-06	1.78452e-06	1.67918e-06	1.15569e-06
Actinobacteria_bacterium_GWC2_53_9	6.21279e-07	5.19977e-07	5.70314e-07	6.56421e-07	3.9605e-07	1.53785e-06	1.34111e-06	7.12794e-07	1.04221e-06	1.13852e-06	1.19618e-06	1.41269e-06	1.0502e-06	7.51519e-07	6.96861e-07	6.44116e-07	1.80263e-06	2.30679e-06	3.2902e-06	1.99843e-06	1.30394e-06	1.84189e-06	1.61864e-06	1.00941e-06
Actinobacteria_bacterium_HGW-Actinobacteria-1	3.25704e-06	1.89621e-06	3.82645e-06	5.39148e-06	2.28597e-06	2.19914e-06	1.5162e-06	1.75752e-06	2.34594e-06	4.52936e-06	4.21673e-06	3.21559e-06	1.93845e-06	2.59209e-06	2.06041e-06	1.94789e-06	1.23469e-06	1.45638e-06	1.30173e-06	1.34036e-06	2.98352e-06	1.48714e-06	9.24543e-07	8.20053e-07
Actinobacteria_bacterium_HGW-Actinobacteria-10	2.30945e-06	2.24543e-06	4.40059e-06	2.3898e-06	2.68497e-06	2.42388e-06	2.93596e-06	1.02659e-06	2.16188e-06	2.64535e-06	2.04653e-06	3.36461e-06	2.96122e-06	5.14139e-06	3.7503e-06	3.31203e-06	8.7356e-07	1.84327e-06	1.69588e-06	7.6289e-07	9.5946e-07	1.86337e-06	9.32073e-07	1.07717e-06
Actinobacteria_bacterium_HGW-Actinobacteria-11	0	0	7.16946e-08	0	1.9631e-07	4.45267e-07	0	0	0	0	0	0	0	1.30612e-07	0	0	0	0	0	0	0	0	0	0
Actinobacteria_bacterium_HGW-Actinobacteria-2	5.80399e-07	6.37238e-07	8.64538e-07	1.1161e-06	1.12863e-06	3.41309e-07	2.18713e-06	6.24802e-07	1.02186e-06	1.34416e-06	1.20329e-06	1.30134e-06	5.50321e-07	1.41383e-06	1.15028e-06	1.61309e-06	8.9048e-07	3.71986e-07	6.27959e-07	4.18433e-07	0	0	3.56228e-07	5.04279e-07
Actinobacteria_bacterium_HGW-Actinobacteria-3	1.79948e-06	2.92852e-06	1.92008e-06	3.32826e-06	2.56761e-06	2.60237e-06	2.32977e-06	3.15202e-06	1.63772e-06	1.13862e-06	1.78113e-06	2.80258e-06	1.67697e-06	1.11848e-06	1.01275e-06	2.46837e-06	1.08262e-06	2.28472e-06	3.32398e-06	1.21048e-06	1.49339e-06	1.48032e-06	9.10565e-07	2.15372e-06
Actinobacteria_bacterium_HGW-Actinobacteria-4	2.37784e-07	4.08691e-07	7.45623e-07	3.33504e-07	1.33206e-06	7.94825e-07	1.46638e-06	1.43444e-06	1.03821e-06	9.69683e-07	1.74918e-06	1.38908e-06	2.10771e-07	7.63059e-07	9.24049e-07	1.16765e-06	4.14827e-07	7.81102e-07	2.65754e-07	7.26447e-07	2.98716e-07	1.38683e-06	4.67631e-07	6.40671e-07
Actinobacteria_bacterium_HGW-Actinobacteria-5	1.09968e-06	3.94151e-07	6.6449e-07	1.99399e-06	2.03363e-06	1.41913e-06	2.23152e-06	1.22348e-06	1.62087e-06	1.75367e-06	2.16078e-06	1.29347e-06	1.90028e-06	1.04548e-06	1.14887e-06	5.07016e-07	6.85926e-07	5.10278e-07	1.39746e-06	3.14178e-07	6.09405e-07	9.49396e-08	6.96931e-07	1.61061e-06
Actinobacteria_bacterium_HGW-Actinobacteria-6	1.94197e-06	8.61009e-07	7.49172e-07	2.88303e-06	2.00453e-06	1.62478e-06	1.74814e-06	1.04549e-06	8.39788e-07	3.07117e-06	1.30106e-06	1.45159e-06	1.58592e-06	1.62904e-06	3.10592e-06	1.98773e-06	2.23768e-06	1.25135e-06	6.64679e-07	1.22834e-06	1.19418e-06	5.77822e-07	4.07081e-07	6.60894e-07
Actinobacteria_bacterium_HGW-Actinobacteria-7	2.01072e-06	1.82709e-06	1.52256e-06	2.04917e-06	1.61172e-06	1.2656e-06	3.28064e-06	1.65731e-06	1.82085e-06	2.98555e-06	1.58205e-06	2.84787e-06	3.362e-06	2.6365e-06	2.92975e-06	1.82032e-06	1.32847e-06	2.12518e-06	1.24353e-06	1.70306e-06	2.18564e-06	1.94319e-06	2.44184e-06	1.76452e-06
Actinobacteria_bacterium_HGW-Actinobacteria-8	1.42009e-06	3.00175e-06	1.23424e-06	1.15389e-06	1.60746e-06	3.02378e-06	2.76795e-06	2.13381e-06	1.843e-06	2.30792e-06	2.22507e-06	1.73695e-06	9.58357e-07	1.16649e-06	1.38838e-06	9.90929e-07	2.83779e-07	2.50081e-06	1.55586e-06	2.11342e-06	8.14283e-07	1.72587e-06	6.29528e-07	1.21593e-06
Actinobacteria_bacterium_HGW-Actinobacteria-9	5.86883e-07	1.21866e-06	4.03671e-07	1.36366e-06	1.17641e-06	2.87324e-07	4.05324e-07	8.3363e-08	8.07657e-07	1.56092e-06	6.62638e-07	1.12658e-06	6.26702e-07	5.42447e-07	1.1068e-06	2.43521e-07	4.42876e-07	4.17093e-07	0	2.94671e-07	1.24293e-07	4.32111e-07	1.6807e-07	2.48167e-07
Actinobacteria_bacterium_IMCC19121	7.16408e-08	0	0	6.51127e-08	0	0	0	0	2.70943e-07	8.23455e-08	9.30444e-08	1.43299e-07	2.29642e-07	0	5.8906e-08	1.80143e-07	1.59663e-07	0	1.85156e-07	0	0	6.84811e-08	3.20578e-07	7.8693e-08
Actinobacteria_bacterium_IMCC25003	1.19728e-07	1.09556e-07	2.98902e-07	1.08819e-07	2.55203e-07	0	3.51057e-07	3.12611e-07	1.05468e-07	2.13527e-07	3.03557e-07	4.77793e-07	8.75511e-08	1.79229e-07	0	9.11976e-08	0	1.41045e-07	1.41182e-07	0	4.90268e-07	0	3.36607e-07	2.53348e-07
Actinobacteria_bacterium_IMCC26077	0	0	8.19366e-08	3.19866e-07	5.31201e-07	8.48127e-08	5.69154e-08	2.7382e-07	8.46058e-08	3.15963e-07	0	6.41646e-07	7.91489e-07	0	3.90289e-07	0	5.59737e-07	0	1.74259e-07	5.23042e-08	0	0	2.56815e-09	3.78969e-07
Actinobacteria_bacterium_IMCC26103	0	0	0	8.92557e-08	0	0	0	0	0	0	0	0	0	0	2.69495e-07	0	1.09432e-07	2.05006e-07	1.26905e-07	8.22762e-07	0	0	0	0
Actinobacteria_bacterium_IMCC26207	5.35802e-06	6.10938e-06	6.34769e-06	6.93927e-06	1.08812e-05	1.03908e-05	8.61346e-06	8.83972e-06	8.88689e-06	8.62695e-06	7.75302e-06	7.16265e-06	7.69305e-06	7.07729e-06	8.40444e-06	7.22049e-06	9.57843e-06	9.93938e-06	1.20071e-05	8.3379e-06	5.1252e-06	5.33898e-06	5.11995e-06	4.6615e-06
Actinobacteria_bacterium_IMCC26256	2.46522e-05	2.32318e-05	2.09244e-05	2.53072e-05	3.66524e-05	3.63478e-05	3.19868e-05	3.39975e-05	2.80758e-05	3.54926e-05	2.74821e-05	2.99329e-05	3.02854e-05	3.29965e-05	3.27973e-05	3.08878e-05	3.713e-05	4.18237e-05	4.28752e-05	3.23366e-05	2.4446e-05	1.97174e-05	1.95597e-05	2.46152e-05
Actinobacteria_bacterium_OK006	1.19799e-06	2.89968e-06	9.45587e-07	5.21097e-07	2.10098e-06	1.00213e-06	1.28882e-06	1.40376e-06	1.5051e-06	3.1583e-06	1.43222e-06	1.63101e-06	1.72838e-06	4.94421e-06	1.12187e-06	2.31209e-06	1.33742e-06	2.06737e-06	2.26267e-06	2.00342e-06	3.06832e-06	1.06654e-06	2.85292e-06	2.09878e-06
Actinobacteria_bacterium_OK074	3.73234e-06	3.60638e-06	2.17013e-06	2.52186e-06	3.56385e-06	5.78357e-06	4.47451e-06	5.87566e-06	3.96795e-06	7.21226e-06	4.53373e-06	8.59849e-06	5.73302e-06	6.96935e-06	3.16766e-06	6.14161e-06	4.58571e-06	1.26439e-05	6.13712e-06	1.1899e-05	9.22917e-06	5.11161e-06	7.35502e-06	6.71923e-06
Actinobacteria_bacterium_OV320	1.14007e-06	2.85225e-06	1.29364e-06	5.61207e-07	2.51989e-06	3.70089e-06	1.80365e-06	3.22309e-06	2.30725e-06	6.43412e-06	3.68509e-06	4.26079e-06	2.26573e-06	6.02145e-06	1.76258e-06	1.33827e-06	4.90063e-06	3.69104e-06	3.59408e-06	6.40889e-06	4.18752e-06	1.84591e-06	7.24249e-06	4.54859e-06
Actinobacteria_bacterium_OV450	7.94438e-07	1.489e-06	2.17256e-06	1.23209e-06	1.24217e-06	1.44278e-06	3.02255e-06	3.6485e-06	1.28906e-06	1.39565e-06	1.09648e-06	2.16893e-06	3.57613e-06	2.3467e-06	9.88753e-07	7.44142e-07	1.92703e-06	4.50991e-06	5.5779e-06	3.20008e-06	1.36898e-06	1.98678e-06	2.86814e-06	2.67893e-06
Actinobacteria_bacterium_QS_5_72_10	5.46903e-06	2.28275e-06	3.44267e-06	3.49848e-06	6.74224e-06	9.96562e-06	5.26686e-06	4.60659e-06	8.79164e-06	7.4989e-06	7.13197e-06	6.87152e-06	3.98007e-06	3.11067e-06	6.25335e-06	5.50022e-06	6.61115e-06	8.92983e-06	5.61029e-06	8.52022e-06	3.55304e-06	3.29795e-06	4.20379e-06	4.90448e-06
Actinobacteria_bacterium_QS_8_72_14	1.7774e-06	1.3378e-06	1.09434e-06	1.76011e-06	3.40718e-06	1.9965e-06	2.38575e-06	2.08092e-06	4.06481e-06	3.89524e-06	2.37862e-06	3.79776e-06	3.16634e-06	3.34756e-06	3.63627e-06	3.66172e-06	4.4472e-06	4.25772e-06	4.76906e-06	4.03113e-06	5.2237e-06	3.56682e-06	4.39156e-06	4.35104e-06
Actinobacteria_bacterium_RBG_13_35_12	2.60901e-07	1.17732e-07	5.8865e-07	0	6.3013e-08	4.5908e-07	4.15862e-07	0	6.94454e-07	7.2624e-07	6.97833e-08	9.82504e-08	9.89233e-07	5.10664e-08	2.02438e-07	3.56562e-07	7.09031e-07	1.28592e-06	0	4.25546e-07	3.92207e-07	6.28172e-08	2.54577e-07	0
Actinobacteria_bacterium_RBG_13_55_18	3.65453e-06	2.21212e-05	9.58313e-06	3.80241e-06	6.21577e-06	3.78188e-06	3.99436e-06	3.85597e-06	1.31277e-05	4.91577e-06	5.33659e-06	6.17385e-06	3.07658e-06	3.80036e-06	2.84906e-06	4.19265e-06	2.58065e-06	6.64526e-07	1.78817e-06	2.94141e-06	6.5188e-06	1.95674e-06	4.24286e-06	4.37425e-06
Actinobacteria_bacterium_RBG_13_63_9	8.91228e-06	1.09546e-05	7.03933e-06	8.66282e-06	8.14798e-06	7.75402e-06	1.05442e-05	6.72256e-06	7.38744e-06	7.00464e-06	7.21211e-06	7.4499e-06	6.77992e-06	6.66452e-06	7.25812e-06	8.97956e-06	6.5957e-06	4.32484e-06	5.63294e-06	7.23539e-06	8.80493e-06	8.95861e-06	8.50062e-06	8.86848e-06
Actinobacteria_bacterium_RBG_16_55_12	1.00155e-06	6.42286e-07	1.32007e-06	1.3147e-06	1.77065e-06	2.12584e-06	1.21566e-06	1.26462e-06	2.3772e-06	2.43693e-06	1.35331e-06	4.23499e-07	6.63815e-07	1.99971e-06	8.52934e-07	6.80129e-07	7.3343e-07	4.68939e-07	1.67925e-06	1.51703e-06	1.19524e-06	1.06288e-06	1.29044e-06	6.4807e-07
Actinobacteria_bacterium_RBG_16_64_13	4.75587e-06	4.76355e-06	5.81136e-06	6.46838e-06	5.09933e-06	6.84886e-06	7.34881e-06	7.153e-06	6.51322e-06	5.12357e-06	6.58295e-06	6.1896e-06	6.27208e-06	6.09966e-06	7.41464e-06	6.21697e-06	5.20847e-06	5.32524e-06	5.56134e-06	3.96244e-06	6.27467e-06	5.33012e-06	6.71318e-06	6.75454e-06
Actinobacteria_bacterium_RBG_16_67_10	3.37811e-05	2.99225e-05	2.97456e-05	3.48989e-05	2.96541e-05	3.01737e-05	2.84155e-05	3.14316e-05	4.24216e-05	4.25985e-05	4.58425e-05	3.3813e-05	4.14405e-05	3.38611e-05	4.38351e-05	3.30059e-05	6.88138e-05	5.80235e-05	6.27688e-05	6.39737e-05	4.36835e-05	3.30623e-05	3.29246e-05	4.29653e-05
Actinobacteria_bacterium_RBG_16_67_15	6.00907e-06	4.07783e-06	3.46549e-06	5.82167e-06	2.48104e-06	2.95344e-06	4.24865e-06	4.26322e-06	6.01227e-06	4.80216e-06	4.56959e-06	4.24915e-06	3.76107e-06	3.19e-06	4.84208e-06	2.61662e-06	7.78057e-06	9.48605e-06	1.14163e-05	6.49549e-06	5.01355e-06	3.81792e-06	3.40286e-06	3.53569e-06
Actinobacteria_bacterium_RBG_16_68_12	7.9481e-05	8.96035e-05	8.94245e-05	8.27485e-05	7.2843e-05	8.12338e-05	7.43636e-05	8.90321e-05	0.000103766	0.000102899	0.000108628	0.000110875	0.000112146	9.54408e-05	0.000109678	9.32914e-05	0.000154665	0.000127881	0.00017404	0.000133012	0.000100381	7.97985e-05	0.000106709	0.000100915
Actinobacteria_bacterium_RBG_16_68_21	2.74682e-06	5.16609e-06	3.99517e-06	3.14743e-06	4.10141e-06	4.19614e-06	4.33507e-06	4.50571e-06	3.62261e-06	3.09915e-06	4.58401e-06	5.58145e-06	4.29675e-06	4.87966e-06	3.10725e-06	6.09206e-06	8.1917e-06	6.84052e-06	1.57614e-05	8.25416e-06	4.13538e-06	2.99301e-06	3.04152e-06	3.85085e-06
Actinobacteria_bacterium_RBG_16_70_17	6.72395e-06	6.52964e-06	6.4534e-06	5.34312e-06	5.88403e-06	9.07261e-06	8.3454e-06	8.06745e-06	4.8199e-06	8.61874e-06	1.15704e-05	7.71264e-06	7.89309e-06	3.89278e-06	7.90012e-06	7.50663e-06	1.29639e-05	1.26136e-05	1.66224e-05	1.29302e-05	5.49431e-06	6.36706e-06	4.75859e-06	4.58533e-06
Actinobacteria_bacterium_RBG_19FT_COMBO_36_27	1.02826e-07	4.79542e-07	1.5676e-07	9.27509e-07	4.15288e-07	0	1.82927e-07	2.49619e-07	8.72992e-07	6.11882e-07	1.58589e-06	1.94102e-07	5.93208e-07	4.11005e-07	3.3251e-07	4.90061e-07	5.80354e-07	3.19403e-07	3.05258e-07	0	5.09301e-07	0	2.33936e-07	9.12887e-07
Actinobacteria_bacterium_RBG_19FT_COMBO_54_7	0	0	2.83148e-07	1.89137e-07	0	0	0	9.87193e-08	0	0	2.69164e-07	0	2.72887e-07	2.85732e-07	8.77684e-07	6.69294e-07	8.72187e-07	3.0274e-07	8.65769e-07	0	1.31714e-07	1.0993e-07	5.69448e-07	0
Actinobacteria_bacterium_RBG_19FT_COMBO_70_19	1.42418e-05	1.15099e-05	1.34962e-05	1.34376e-05	1.36813e-05	1.22499e-05	1.28134e-05	1.42457e-05	2.33129e-05	2.3533e-05	2.4033e-05	2.48692e-05	1.86551e-05	1.72625e-05	1.63047e-05	1.3834e-05	2.02971e-05	2.57014e-05	0.000156366	1.73941e-05	2.03081e-05	1.64464e-05	1.79529e-05	2.37159e-05
Actinobacteria_bacterium_SCGC_AG-212-D09	4.29982e-06	8.08816e-06	5.02859e-06	8.28604e-06	7.62186e-06	8.96204e-06	8.9563e-06	8.90108e-06	6.75862e-06	7.8834e-06	7.00014e-06	8.06529e-06	6.0814e-06	8.90924e-06	5.10993e-06	7.09792e-06	2.46971e-06	7.24983e-07	4.1809e-06	4.29892e-06	4.33538e-06	4.98296e-06	6.22555e-06	5.65677e-06
Actinobacteria_bacterium_TMED172	0	0	0	0	8.95449e-08	0	1.02598e-07	4.11331e-07	0	0	5.65598e-07	6.91824e-07	3.59184e-07	0	5.43446e-07	8.38599e-08	0	0	4.27047e-07	3.60718e-07	1.0762e-07	0	1.37694e-07	1.10351e-07
Actinobacteria_bacterium_TMED270	6.41493e-07	6.6286e-08	0	5.44944e-07	1.29217e-07	9.76957e-08	9.87014e-08	0	6.46986e-08	5.2395e-07	1.89998e-07	3.10034e-07	0	3.61317e-07	1.59701e-07	2.77056e-07	1.63688e-07	5.18986e-07	2.5099e-07	4.47413e-07	1.18653e-07	0	2.90945e-07	8.06769e-08
Actinobacteria_bacterium_YIM_96077	0	4.2122e-07	2.07118e-07	0	1.6524e-07	2.83199e-07	1.26445e-07	3.17446e-07	0	1.64235e-06	4.52594e-07	4.278e-07	1.5144e-07	5.7551e-07	2.52187e-07	2.2642e-07	2.70539e-07	0	0	8.43615e-08	0	0	1.20217e-07	0
Actinobaculum_massiliense	4.63584e-07	1.03203e-06	5.16853e-07	2.14696e-07	2.48411e-07	5.05899e-07	1.0537e-07	8.06438e-07	2.08085e-07	2.10642e-07	6.25161e-07	2.77223e-07	8.51849e-07	7.80671e-08	2.76834e-07	1.23464e-06	1.21743e-07	0	1.52629e-07	1.3076e-07	5.96272e-07	3.47885e-07	3.24653e-07	1.29737e-07
Actinobaculum_sp._352	2.18504e-07	2.38282e-07	5.69582e-07	4.20245e-07	2.61747e-07	1.07194e-07	2.67495e-08	9.37834e-08	2.99411e-07	5.55949e-07	0	6.83779e-07	5.35909e-07	1.52626e-07	5.83401e-07	9.11976e-08	3.28913e-07	3.18745e-07	4.91067e-07	6.64692e-07	3.1201e-07	9.44033e-08	2.40434e-07	0
Actinobaculum_sp._oral_taxon_183	0	0	3.55059e-07	0	0	3.4302e-07	0	0	1.11582e-07	1.12953e-07	4.24597e-07	0	1.01509e-07	2.86979e-07	5.20763e-07	1.02758e-07	0	0	0	0	0	0	0	0
Actinobaculum_suis	0	2.1611e-07	0	0	9.45196e-08	1.07194e-07	4.3319e-07	1.04204e-07	0	0	0	0	0	0	5.64832e-07	0	0	0	0	0	0	0	0	0
Actinocatenispora_sera	2.4741e-05	2.38484e-05	3.55995e-05	2.09341e-05	2.69159e-05	2.84778e-05	2.80038e-05	4.07162e-05	1.238e-05	1.99304e-05	2.16225e-05	1.7651e-05	1.99106e-05	2.05891e-05	1.8549e-05	2.32806e-05	1.38255e-05	1.11776e-05	6.14958e-06	1.36947e-05	1.68747e-05	1.27238e-05	1.2884e-05	1.33514e-05
Actinocorallia_herbida	1.02772e-05	1.4342e-05	6.02528e-05	1.65723e-05	1.94596e-05	1.89705e-05	2.03694e-05	1.97049e-05	1.67328e-05	1.16639e-05	1.74828e-05	1.27546e-05	1.23517e-05	1.5117e-05	1.38145e-05	1.24438e-05	1.31043e-05	1.34956e-05	1.57525e-05	1.06696e-05	1.03944e-05	1.03192e-05	1.16514e-05	1.11555e-05
Actinocorallia_populi	1.29278e-05	1.29935e-05	6.54384e-05	1.56915e-05	2.09734e-05	1.90395e-05	2.42077e-05	2.13235e-05	1.05844e-05	1.25966e-05	1.55619e-05	1.43463e-05	9.56358e-06	1.2411e-05	8.51764e-06	1.20134e-05	9.75938e-06	1.43134e-05	1.05898e-05	1.07691e-05	1.15181e-05	1.07139e-05	1.47314e-05	1.50197e-05
Actinocrispum_wychmicini	3.7583e-05	3.52847e-05	5.22342e-05	5.18969e-05	4.0109e-05	5.74231e-05	6.13343e-05	4.23042e-05	8.4792e-05	0.000102057	4.42189e-05	0.000123316	0.000407172	4.23844e-05	3.74055e-05	0.00136263	1.95917e-05	2.83295e-05	1.7726e-05	2.28132e-05	1.94074e-05	1.65024e-05	2.58357e-05	2.38345e-05
Actinokineospora_auranticolor	8.66397e-06	8.77821e-06	1.749e-05	8.70532e-06	7.79423e-06	9.83342e-06	1.01968e-05	8.35601e-06	5.59268e-06	9.22617e-06	6.77073e-06	8.65367e-06	5.51932e-06	6.69618e-06	6.45981e-06	1.10681e-05	4.89538e-06	6.66527e-06	2.59472e-06	6.20176e-06	5.65472e-06	4.1501e-06	5.73092e-06	3.41209e-06
Actinokineospora_bangkokensis	4.77268e-06	3.67894e-06	4.11224e-06	7.90998e-06	6.56866e-06	6.56628e-06	6.78324e-06	5.46056e-06	5.83402e-06	6.55204e-06	4.91239e-06	4.6621e-06	5.98953e-06	4.2468e-06	3.27187e-06	5.92292e-06	2.71885e-06	5.80739e-06	2.88706e-06	2.93863e-06	3.01187e-06	4.09149e-06	2.84907e-06	5.83607e-06
Actinokineospora_cianjurensis	1.50483e-06	1.85e-06	6.83298e-06	2.86814e-06	2.38841e-06	3.71282e-06	2.7119e-06	3.68034e-06	3.48954e-06	3.18079e-06	5.44568e-06	2.23654e-06	2.88305e-06	1.57015e-06	2.60369e-06	3.51018e-06	1.71231e-06	2.4757e-06	3.26655e-06	2.96711e-06	1.65019e-06	1.88746e-06	2.15069e-06	2.65795e-06
Actinokineospora_enzanensis	5.2532e-06	4.44346e-06	1.41344e-05	7.9255e-06	9.32069e-06	7.85223e-06	6.63546e-06	8.07357e-06	5.58869e-06	5.58825e-06	1.10035e-05	8.1667e-06	8.24059e-06	5.81131e-06	6.40892e-06	8.68805e-06	7.83718e-06	5.35042e-06	5.95475e-06	5.93506e-06	3.09206e-06	2.8631e-06	2.97232e-06	4.72096e-06
Actinokineospora_fastidiosa	0	1.14319e-07	0	3.96267e-07	0	0	0	0	0	0	0	0	0	0	3.12458e-07	0	0	0	0	0	0	0	0	0
Actinokineospora_inagensis	3.02785e-06	6.02571e-06	6.26955e-06	5.34553e-06	5.2055e-06	6.48994e-06	7.46929e-06	7.72193e-06	5.42268e-06	3.94886e-06	4.19482e-06	4.50403e-06	5.75858e-06	5.26395e-06	5.3394e-06	7.25848e-06	5.03102e-06	3.78623e-06	5.08065e-06	4.78683e-06	3.94609e-06	3.8579e-06	4.0499e-06	3.09464e-06
Actinokineospora_mzabensis	2.37971e-06	3.76459e-06	8.43729e-06	4.42007e-06	2.68984e-06	2.70499e-06	6.16652e-06	4.94193e-06	4.56371e-06	3.60989e-06	4.16793e-06	5.95843e-06	4.36706e-06	3.60842e-06	4.11319e-06	5.2917e-06	4.2415e-06	3.8889e-06	3.14375e-06	2.7881e-06	3.08572e-06	3.06248e-06	4.56477e-06	3.92368e-06
Actinokineospora_sp._TRM65233	2.07179e-06	2.76988e-06	4.63796e-06	4.24431e-06	5.80084e-06	3.93695e-06	5.05401e-06	3.79976e-06	2.36376e-06	2.94932e-06	4.65381e-06	2.84261e-06	2.43902e-06	4.23046e-06	2.75132e-06	5.4763e-06	3.50462e-06	4.07291e-06	5.95879e-06	1.34794e-06	1.96424e-06	1.68338e-06	4.13251e-06	2.07095e-06
Actinokineospora_spheciospongiae	2.2079e-06	2.10837e-06	2.0995e-06	4.375e-06	3.21964e-06	2.34144e-06	3.30566e-06	2.97745e-06	4.05959e-06	2.1991e-06	2.20818e-06	1.85549e-06	4.97609e-06	3.60456e-06	2.69954e-06	5.47005e-06	2.00376e-06	2.37913e-06	2.52922e-06	1.54287e-06	8.57084e-07	1.31424e-06	2.34697e-06	1.25247e-06
Actinokineospora_terrae	4.98824e-06	6.81048e-06	9.24998e-06	6.83335e-06	5.53382e-06	4.50815e-06	5.2963e-06	5.15839e-06	6.09246e-06	2.91629e-06	5.47962e-06	4.52979e-06	2.85756e-06	3.73632e-06	4.41181e-06	7.18188e-06	2.8027e-06	1.80065e-06	3.26935e-06	1.11982e-06	3.09821e-06	3.12147e-06	4.33336e-06	2.02576e-06
Actinomadura_amylolytica	7.31138e-06	9.7547e-06	1.2621e-05	1.10718e-05	9.95713e-06	1.19581e-05	1.24175e-05	1.20349e-05	2.24625e-05	1.38972e-05	1.48242e-05	1.31612e-05	7.21304e-06	6.80023e-06	1.00995e-05	1.07259e-05	4.84015e-06	8.54581e-06	4.62436e-06	6.44358e-06	8.52911e-06	3.96092e-06	8.14682e-06	6.50932e-06
Actinomadura_atramentaria	3.55083e-06	6.57415e-06	8.18346e-06	8.28431e-06	1.61607e-05	1.14346e-05	1.83096e-05	1.10863e-05	7.29836e-06	6.48601e-06	9.27637e-06	8.4198e-06	9.41081e-06	8.88436e-06	7.61156e-06	7.25208e-06	7.46872e-06	6.9183e-06	8.14864e-06	8.20143e-06	5.54975e-06	6.0054e-06	6.33649e-06	7.35334e-06
Actinomadura_bangladeshensis	7.82453e-06	9.28691e-06	1.27259e-05	9.88247e-06	1.41875e-05	1.38832e-05	1.38521e-05	1.91514e-05	5.26329e-05	3.42111e-05	4.01616e-05	7.23003e-05	1.19318e-05	1.312e-05	1.05305e-05	7.21498e-06	9.3012e-06	1.09624e-05	7.91293e-06	8.72433e-06	3.5492e-05	8.34121e-06	1.31559e-05	1.32905e-05
Actinomadura_catellatispora	4.73297e-06	4.79704e-06	4.2364e-06	4.88365e-06	6.37901e-06	6.50754e-06	6.80885e-06	5.07999e-06	7.1828e-05	4.07123e-05	2.96979e-05	3.12549e-05	5.92268e-06	5.48122e-06	5.43887e-06	8.34338e-06	4.09849e-06	3.47158e-06	3.09664e-06	1.88734e-06	4.93659e-06	4.11613e-06	6.14635e-06	2.87446e-06
Actinomadura_cellulosilytica	8.86586e-06	1.7394e-05	1.43456e-05	1.07102e-05	1.87035e-05	2.03395e-05	2.24234e-05	2.02216e-05	2.91148e-05	2.26181e-05	2.6755e-05	1.8752e-05	1.05234e-05	1.51051e-05	1.49897e-05	1.21641e-05	9.97144e-06	1.04296e-05	1.09138e-05	7.07489e-06	5.55305e-06	6.06293e-06	1.43487e-05	9.45032e-06
Actinomadura_chibensis	7.92311e-06	8.4251e-06	7.04556e-06	8.0545e-06	1.02419e-05	1.25748e-05	1.25608e-05	1.28162e-05	1.72701e-05	1.55843e-05	1.38348e-05	1.29228e-05	8.71986e-06	8.08562e-06	8.63227e-06	8.12837e-06	7.22519e-06	6.75218e-06	6.58323e-06	5.3947e-06	8.0411e-06	6.45477e-06	8.2645e-06	7.17809e-06
Actinomadura_citrea	2.22914e-06	3.54302e-06	3.28802e-06	3.85388e-06	4.27185e-06	5.92525e-06	4.29576e-06	6.79255e-06	1.18297e-05	8.28152e-06	7.8002e-06	9.59123e-06	2.36319e-06	4.18299e-06	3.76455e-06	4.14555e-06	2.19595e-06	4.03866e-06	1.40657e-06	1.25388e-06	1.14406e-06	1.19166e-06	5.19804e-06	3.56693e-06
Actinomadura_coerulea	3.14034e-06	4.08965e-06	2.92595e-06	3.46695e-06	5.68148e-06	9.05578e-06	7.68343e-06	7.29631e-06	1.6743e-05	9.42184e-06	8.63658e-06	1.2999e-05	3.92959e-06	4.82505e-06	3.87829e-06	4.1687e-06	1.71343e-06	2.89668e-06	1.1243e-06	2.38722e-06	3.16629e-06	2.18851e-06	5.47637e-06	2.71404e-06
Actinomadura_darangshiensis	5.75383e-06	9.19453e-06	6.78263e-06	9.14511e-06	1.00718e-05	1.56895e-05	1.23147e-05	1.35391e-05	2.34923e-05	2.09324e-05	1.60328e-05	2.21491e-05	7.81335e-06	9.24872e-06	8.13408e-06	9.69688e-06	4.75425e-06	6.86855e-06	4.01821e-06	4.44256e-06	6.21421e-06	4.7722e-06	8.48303e-06	6.4199e-06
Actinomadura_echinospora	1.76941e-05	1.81795e-05	2.09876e-05	1.53639e-05	2.74034e-05	2.6964e-05	3.06154e-05	2.71559e-05	2.66003e-05	2.14105e-05	2.44227e-05	1.86358e-05	1.31854e-05	1.68774e-05	1.69989e-05	1.83067e-05	1.62011e-05	1.43616e-05	1.49566e-05	1.19092e-05	1.52501e-05	1.03293e-05	1.33378e-05	1.42465e-05
Actinomadura_fibrosa	1.91653e-05	1.48966e-05	1.68693e-05	1.83222e-05	2.49078e-05	2.58375e-05	2.74168e-05	2.49242e-05	2.22932e-05	1.91217e-05	2.36854e-05	1.93857e-05	1.6979e-05	1.58868e-05	1.48039e-05	2.19468e-05	1.4407e-05	1.11667e-05	1.26274e-05	1.03375e-05	1.43705e-05	1.03496e-05	1.70778e-05	9.11177e-06
Actinomadura_flavalba	6.3093e-06	6.90599e-06	8.25873e-06	5.44563e-06	1.39823e-05	1.36777e-05	1.27864e-05	8.09605e-06	7.7787e-06	9.30753e-06	7.78488e-06	6.97335e-06	5.88823e-06	7.5783e-06	6.22781e-06	5.83784e-06	4.26076e-06	4.1266e-06	4.67476e-06	3.3368e-06	3.37091e-06	4.35721e-06	4.7051e-06	4.37137e-06
Actinomadura_formosensis	7.27438e-06	8.55982e-06	8.66271e-06	9.53094e-06	1.28125e-05	1.32562e-05	1.0471e-05	1.40386e-05	2.47003e-05	1.49813e-05	1.35661e-05	1.9724e-05	8.94072e-06	8.44427e-06	1.02242e-05	8.91654e-06	6.9047e-06	5.61927e-06	4.49772e-06	5.88094e-06	5.81844e-06	5.18572e-06	7.19184e-06	4.75796e-06
Actinomadura_geliboluensis	5.69669e-06	6.5346e-06	7.62024e-06	6.90404e-06	8.60096e-06	9.83711e-06	9.21229e-06	9.58533e-06	2.78613e-05	1.72083e-05	1.47065e-05	1.67275e-05	7.05321e-06	7.16588e-06	6.8239e-06	7.25471e-06	4.84336e-06	3.96318e-06	4.26841e-06	1.35899e-06	6.13596e-06	4.22775e-06	4.53552e-06	2.73392e-06
Actinomadura_hallensis	5.86283e-06	9.99542e-06	8.04264e-06	8.15341e-06	1.44518e-05	1.40095e-05	1.64217e-05	9.56254e-06	8.38113e-05	6.09898e-05	4.86585e-05	5.74209e-05	9.49361e-06	1.20344e-05	8.07888e-06	1.20686e-05	9.53823e-06	5.91924e-06	9.1182e-06	6.86037e-06	6.24611e-06	5.27351e-06	5.92641e-06	7.70034e-06
Actinomadura_harenae	8.09464e-06	1.2259e-05	1.05675e-05	1.11769e-05	1.78131e-05	1.20858e-05	1.22187e-05	1.17402e-05	1.94391e-05	1.12288e-05	7.97343e-06	1.11838e-05	9.59095e-06	1.04868e-05	9.13208e-06	1.0217e-05	5.68927e-06	3.58809e-06	3.06302e-06	3.55443e-06	8.70801e-06	6.19873e-06	6.76046e-06	4.92638e-06
Actinomadura_hibisca	9.48539e-06	1.32634e-05	1.56857e-05	1.08222e-05	1.6457e-05	1.77876e-05	1.97022e-05	1.86999e-05	1.21023e-05	1.28589e-05	1.65355e-05	1.184e-05	1.02361e-05	1.20102e-05	1.09946e-05	1.38825e-05	1.03289e-05	1.29443e-05	1.26813e-05	9.74629e-06	7.04892e-06	7.12667e-06	1.06215e-05	8.99046e-06
Actinomadura_kijaniata	8.3905e-06	8.72736e-06	8.73356e-06	8.9879e-06	1.62097e-05	1.51127e-05	1.33785e-05	1.45204e-05	8.50089e-06	1.23212e-05	1.08717e-05	7.11004e-06	1.13503e-05	1.22868e-05	7.91759e-06	9.31269e-06	8.51096e-06	1.02709e-05	7.69962e-06	5.30988e-06	9.18063e-06	4.52986e-06	7.93259e-06	8.93539e-06
Actinomadura_latina	4.35314e-06	7.97148e-06	6.42816e-06	9.66172e-06	1.06457e-05	1.2016e-05	1.36449e-05	1.17496e-05	2.44164e-05	1.89654e-05	1.69002e-05	1.85757e-05	9.17383e-06	7.60056e-06	5.54494e-06	9.26854e-06	4.87458e-06	4.2769e-06	4.41806e-06	5.52368e-06	9.25752e-06	5.32444e-06	7.79334e-06	4.41786e-06
Actinomadura_luteofluorescens	6.43973e-06	5.5034e-06	4.03518e-06	6.36597e-06	7.54565e-06	7.43167e-06	9.70138e-06	8.92431e-06	1.12842e-05	9.14581e-06	8.87307e-06	6.59852e-06	6.65966e-06	4.40231e-06	7.07996e-06	6.74461e-06	3.97554e-06	4.23212e-06	5.24502e-06	5.62655e-06	2.84427e-06	4.93272e-06	5.48225e-06	3.65376e-06
Actinomadura_macra	8.34849e-06	8.14285e-06	1.78869e-05	8.50657e-06	7.14062e-06	1.00118e-05	1.11998e-05	1.11701e-05	2.38412e-05	1.69134e-05	2.02252e-05	1.70017e-05	6.61396e-06	9.2691e-06	1.00976e-05	1.15154e-05	8.09056e-06	3.79999e-06	7.39657e-06	4.63724e-06	8.67515e-06	3.48117e-06	1.11209e-05	6.17624e-06
Actinomadura_madurae	1.29073e-05	1.51853e-05	1.1395e-05	1.29464e-05	1.28177e-05	1.52273e-05	1.98886e-05	2.04447e-05	6.55227e-05	4.27682e-05	3.0193e-05	4.67512e-05	1.48717e-05	1.79665e-05	1.36392e-05	1.47299e-05	7.55845e-06	1.16466e-05	1.19827e-05	6.54443e-06	8.12892e-06	9.28915e-06	1.17076e-05	7.26928e-06
Actinomadura_mexicana	2.7953e-06	3.14309e-06	3.65532e-06	2.79501e-06	6.59276e-06	7.29981e-06	4.89758e-06	7.1211e-06	1.81611e-05	1.20768e-05	1.26051e-05	9.89042e-06	5.22686e-06	5.13546e-06	2.48387e-06	5.96223e-06	4.38309e-06	6.27613e-07	1.92456e-06	1.36952e-06	8.47878e-07	2.21823e-06	4.44051e-06	3.02166e-06
Actinomadura_meyerae	7.35595e-06	7.58636e-06	9.89363e-06	6.91037e-06	9.95738e-06	8.72061e-06	9.07272e-06	1.08176e-05	3.09087e-05	1.84639e-05	1.63512e-05	1.82116e-05	6.6545e-06	6.7106e-06	7.85752e-06	6.2576e-06	7.4516e-06	6.4203e-06	4.9219e-06	5.29685e-06	3.96345e-06	3.03199e-06	3.25466e-06	5.79464e-06
Actinomadura_montaniterrae	8.79472e-06	9.57229e-06	9.18779e-06	2.00533e-05	1.46075e-05	1.95106e-05	1.64937e-05	1.52506e-05	2.60423e-05	1.46464e-05	1.68408e-05	1.64604e-05	1.23282e-05	1.10138e-05	9.73828e-06	1.36246e-05	8.25375e-06	6.99711e-06	1.04072e-05	8.0124e-06	1.02022e-05	5.44098e-06	1.19638e-05	6.14252e-06
Actinomadura_namibiensis	8.60311e-06	8.56839e-06	9.16777e-06	9.32722e-06	9.25343e-06	1.6227e-05	1.6501e-05	1.42324e-05	9.28674e-06	8.77612e-06	9.91438e-06	1.00087e-05	7.12534e-06	9.15218e-06	1.1586e-05	9.23809e-06	1.09557e-05	1.04666e-05	1.18614e-05	6.55105e-06	7.1418e-06	4.72129e-06	1.15558e-05	8.10358e-06
Actinomadura_oligospora	7.58264e-06	1.18628e-05	1.2264e-05	8.36957e-06	1.56136e-05	1.57234e-05	1.67704e-05	1.43779e-05	1.12336e-05	9.8607e-06	1.02672e-05	1.15963e-05	9.13956e-06	9.54156e-06	8.56621e-06	9.77457e-06	6.0818e-06	5.66749e-06	4.60003e-06	4.3069e-06	5.21725e-06	4.50393e-06	6.93231e-06	4.19198e-06
Actinomadura_parvosata	5.01171e-06	4.89977e-06	4.11569e-06	6.089e-06	4.54912e-06	6.87169e-06	8.16672e-06	7.85148e-06	6.24105e-06	3.60659e-06	9.27892e-06	5.81033e-06	7.36607e-06	6.76791e-06	5.02749e-06	6.62741e-06	7.44876e-06	7.98785e-06	6.04448e-06	6.03728e-06	2.9781e-06	2.5013e-06	3.67988e-06	3.38648e-06
Actinomadura_pelletieri	6.26635e-06	6.69381e-06	2.85333e-06	3.02432e-06	6.70911e-06	7.75754e-06	7.76795e-06	6.58419e-06	1.66479e-05	8.14942e-06	5.91529e-06	9.69566e-06	4.83402e-06	3.33582e-06	5.46032e-06	4.5115e-06	2.37167e-06	2.53308e-06	1.64034e-06	2.63654e-06	2.95892e-06	3.03876e-06	3.60505e-06	3.41939e-06
Actinomadura_rayongensis	5.76983e-06	8.9346e-06	1.10934e-05	8.04088e-06	9.15917e-06	1.24254e-05	1.31163e-05	9.91514e-06	7.09078e-06	5.01025e-06	6.83563e-06	5.45347e-06	8.1699e-06	5.71864e-06	7.06751e-06	6.91465e-06	7.05667e-06	4.27798e-06	7.40915e-06	4.69353e-06	4.3975e-06	4.86511e-06	5.01147e-06	6.76254e-06
Actinomadura_rifamycini	1.95771e-06	3.54946e-06	1.78713e-06	2.74581e-06	3.77176e-06	4.76244e-06	6.03907e-06	4.6336e-06	3.79027e-06	3.8997e-06	3.0681e-06	3.27808e-06	2.4732e-06	3.81662e-06	2.19453e-06	3.34258e-06	2.52926e-06	2.30677e-06	2.30079e-06	1.43354e-06	6.23233e-07	2.71358e-07	1.08425e-06	2.07223e-06
Actinomadura_roseirufa	4.95292e-06	8.7575e-06	7.66969e-06	5.25584e-06	7.63657e-06	1.16695e-05	1.03104e-05	9.46072e-06	4.47046e-06	5.05476e-06	9.54117e-06	4.37921e-06	8.45394e-06	6.79121e-06	6.62079e-06	5.74877e-06	6.40975e-06	3.47057e-06	2.29095e-06	4.34966e-06	2.86741e-06	3.1031e-06	1.16009e-05	4.82403e-06
Actinomadura_rubrobrunea	2.24578e-07	6.7828e-07	0	1.2228e-06	7.04749e-07	1.28164e-06	1.4029e-06	6.1471e-07	1.16808e-06	4.69533e-07	3.03105e-07	2.61714e-07	4.26499e-07	5.54913e-07	0	9.2352e-08	0	2.56445e-07	0	1.50516e-07	3.39416e-07	2.27323e-07	8.83542e-07	0
Actinomadura_rudentiformis	1.56112e-05	1.61715e-05	2.06601e-05	1.99551e-05	2.25499e-05	2.43382e-05	2.49365e-05	2.34811e-05	2.50239e-05	1.92836e-05	2.46414e-05	1.68262e-05	2.25469e-05	1.88367e-05	1.44543e-05	1.64684e-05	1.69494e-05	1.63521e-05	1.67207e-05	1.49762e-05	1.27943e-05	1.18112e-05	1.78295e-05	1.36205e-05
Actinomadura_sp.	0	0	0	0	0	0	0	0	0	0	0	0	0	0	0	0	0	0	0	0	0	0	1.76683e-06	0
Actinomadura_sp._14C53	5.21836e-06	5.01505e-06	9.2852e-06	7.38568e-06	9.92783e-06	1.1392e-05	8.83717e-06	1.18502e-05	2.38697e-05	1.85775e-05	1.40687e-05	1.2569e-05	7.19452e-06	9.39322e-06	9.09666e-06	7.41441e-06	7.08033e-06	1.02816e-05	7.5369e-06	7.64463e-06	6.85454e-06	6.21625e-06	1.10679e-05	4.17198e-06
Actinomadura_sp._6K520	5.1274e-06	5.81727e-06	5.08331e-06	4.6576e-06	7.39506e-06	5.92141e-06	6.85211e-06	6.60225e-06	7.30984e-05	5.55012e-05	3.71759e-05	4.17576e-05	8.32884e-06	5.69333e-06	5.98201e-06	8.04003e-06	5.48054e-06	5.93657e-06	8.24821e-06	5.1845e-06	3.65999e-06	4.06388e-06	6.63586e-06	3.40883e-06
Actinomadura_sp._7K507	6.52886e-06	5.79916e-06	6.34517e-06	5.80569e-06	9.02325e-06	8.71774e-06	1.0773e-05	1.1779e-05	0.000138773	7.2637e-05	4.77559e-05	7.11191e-05	9.915e-06	1.02353e-05	9.35643e-06	1.22042e-05	7.7727e-06	1.28556e-05	8.00324e-06	1.17223e-05	9.2687e-06	4.85355e-06	9.34394e-06	6.38781e-06
Actinomadura_sp._7K534	4.76278e-06	6.32665e-06	4.59227e-06	4.24097e-06	8.17924e-06	5.11273e-06	7.02602e-06	6.56879e-06	5.85106e-05	3.45701e-05	2.40097e-05	3.10724e-05	5.84534e-06	8.4385e-06	7.90639e-06	7.26408e-06	4.91696e-06	6.92007e-06	2.89506e-06	3.65766e-06	8.54141e-06	2.76818e-06	4.80994e-06	4.01705e-06
Actinomadura_sp._ATCC_39365	0	4.46248e-07	0	0	4.67038e-07	0	0	0	0	0	0	0	6.86676e-08	0	0	7.15276e-08	0	0	0	0	0	0	0	0
Actinomadura_sp._BRA_177	6.54008e-06	4.47716e-06	5.88936e-06	6.70885e-06	6.21044e-06	6.76484e-06	8.44704e-06	5.16187e-06	2.80766e-05	1.75591e-05	1.98683e-05	2.15434e-05	8.86383e-06	8.06257e-06	7.06905e-06	8.71975e-06	7.77029e-06	6.67881e-06	9.03712e-06	5.27017e-06	5.75109e-06	4.44333e-06	7.3897e-06	8.59209e-06
Actinomadura_sp._CNU-125	3.89218e-06	6.16849e-06	1.10567e-05	4.7268e-06	9.01246e-06	7.45193e-06	7.83001e-06	7.25367e-06	3.23573e-05	1.40238e-05	1.80421e-05	1.08333e-05	6.5096e-06	8.85974e-06	7.68913e-06	5.69723e-06	4.81762e-06	4.45097e-06	2.22062e-06	9.7217e-07	5.31286e-06	5.30832e-06	6.12493e-06	6.76722e-06
Actinomadura_sp._CYP1-5	4.15982e-06	6.33022e-06	8.01439e-06	7.49808e-06	7.85021e-06	9.66372e-06	1.06831e-05	1.10334e-05	4.344e-05	2.45197e-05	2.83806e-05	2.09812e-05	6.30024e-06	7.21672e-06	7.1188e-06	1.12102e-05	2.64229e-06	9.3702e-06	2.83818e-06	2.5147e-06	3.98612e-06	3.33812e-06	1.51118e-05	4.65043e-06
Actinomadura_sp._DSM_109109	7.5444e-06	7.26127e-06	9.87784e-06	8.07362e-06	1.07975e-05	1.17596e-05	1.30688e-05	1.29283e-05	1.82593e-05	1.1826e-05	1.58904e-05	1.41627e-05	9.38611e-06	8.41369e-06	8.04654e-06	9.35282e-06	1.0393e-05	9.57208e-06	6.57225e-06	8.81578e-06	6.15598e-06	9.02658e-06	6.27653e-06	9.37712e-06
Actinomadura_sp._GC306	4.38887e-06	5.58723e-06	3.91252e-06	6.10755e-06	1.19998e-05	1.36462e-05	9.70418e-06	1.29958e-05	4.97256e-05	2.67094e-05	2.32792e-05	2.81166e-05	8.71306e-06	8.62912e-06	6.70961e-06	7.62838e-06	4.24954e-06	5.36673e-06	3.64024e-06	3.61949e-06	5.90812e-06	3.9536e-06	6.5447e-06	5.83134e-06
Actinomadura_sp._H3C3	1.12987e-05	1.06123e-05	2.03917e-05	1.15387e-05	1.60387e-05	1.64035e-05	1.72511e-05	1.71093e-05	4.108e-05	2.25183e-05	3.01214e-05	1.78972e-05	1.29367e-05	9.91549e-06	1.3302e-05	1.88387e-05	8.56605e-06	4.58443e-06	7.25615e-06	5.50169e-06	5.52782e-06	3.56843e-06	6.87529e-06	6.74074e-06
Actinomadura_sp._J1-007	1.20393e-05	1.59828e-05	1.26713e-05	1.41737e-05	2.37448e-05	2.0575e-05	1.88908e-05	1.869e-05	1.28995e-05	1.29645e-05	1.2492e-05	1.6655e-05	1.6259e-05	1.45771e-05	1.54678e-05	1.73663e-05	8.2245e-06	1.28906e-05	7.47017e-06	7.27591e-06	9.07347e-06	8.99362e-06	1.3661e-05	8.70248e-06
Actinomadura_sp._K4S16	1.07713e-05	1.11501e-05	1.74656e-05	1.01261e-05	1.41183e-05	1.5151e-05	1.86724e-05	1.92896e-05	2.34775e-05	2.00208e-05	1.76833e-05	2.22604e-05	1.22352e-05	1.09284e-05	1.21547e-05	1.14352e-05	9.11793e-06	9.28522e-06	1.21342e-05	7.1952e-06	1.21499e-05	8.73324e-06	7.63108e-06	7.61711e-06
Actinomadura_sp._KC06	6.9343e-06	6.64951e-06	1.03417e-05	6.39652e-06	9.06675e-06	1.28563e-05	1.21984e-05	8.99455e-06	3.2406e-05	2.3474e-05	1.98456e-05	2.14483e-05	9.58309e-06	6.29559e-06	1.00267e-05	8.2884e-06	6.10662e-06	3.94539e-06	4.06269e-06	5.92998e-06	3.94236e-06	3.34239e-06	8.15629e-06	7.25058e-06
Actinomadura_sp._KC216	4.62389e-06	6.07492e-06	1.03014e-05	6.6755e-06	1.01009e-05	7.6146e-06	9.05364e-06	8.83815e-06	0.000115182	3.68985e-05	3.98871e-05	3.65061e-05	1.07654e-05	1.15652e-05	1.14192e-05	9.4291e-06	1.26446e-05	8.96692e-06	1.00322e-05	1.04061e-05	5.09923e-06	6.36078e-06	8.08094e-06	8.93515e-06
Actinomadura_sp._KC345	5.79126e-06	7.77726e-06	8.20125e-06	8.80048e-06	1.12847e-05	1.26575e-05	1.0068e-05	8.15906e-06	0.000104303	6.24263e-05	4.02427e-05	5.69842e-05	1.16694e-05	1.01865e-05	1.22666e-05	1.17212e-05	6.66142e-06	4.69517e-06	8.84848e-06	5.89514e-06	7.49688e-06	3.15472e-06	8.9514e-06	5.6044e-06
Actinomadura_sp._LD22	7.62748e-06	9.96044e-06	8.81029e-06	1.21222e-05	1.4137e-05	1.66557e-05	1.62345e-05	1.55886e-05	1.66821e-05	1.41961e-05	1.30982e-05	1.3782e-05	9.70857e-06	1.41365e-05	8.80965e-06	9.31992e-06	1.0342e-05	1.06674e-05	1.29575e-05	7.99327e-06	8.68431e-06	4.37179e-06	1.11642e-05	6.11744e-06
Actinomadura_sp._LHW52907	4.9239e-06	3.76462e-06	4.72147e-06	4.19337e-06	5.88359e-06	7.05796e-06	6.2779e-06	5.84293e-06	1.46826e-05	8.95722e-06	1.06657e-05	8.05331e-06	3.65467e-06	4.88405e-06	3.86419e-06	4.39397e-06	5.87762e-06	2.87116e-06	4.30915e-06	2.23857e-06	4.58471e-06	3.39606e-06	3.37655e-06	3.69568e-06
Actinomadura_sp._LHW63021	1.81514e-05	2.14694e-05	3.12495e-05	2.25926e-05	3.58444e-05	3.29565e-05	3.68407e-05	3.42393e-05	2.29145e-05	1.78182e-05	2.6589e-05	1.96005e-05	1.79391e-05	2.11925e-05	1.9146e-05	1.69837e-05	1.06636e-05	1.55927e-05	1.19136e-05	1.20085e-05	1.45652e-05	1.53976e-05	2.13895e-05	1.72177e-05
Actinomadura_sp._NAK00032	4.29696e-06	7.92075e-06	5.22705e-06	4.88077e-06	7.97318e-06	1.21172e-05	7.39722e-06	6.80342e-06	2.1677e-05	1.0181e-05	1.171e-05	1.17836e-05	5.2606e-06	6.33828e-06	5.62402e-06	6.76925e-06	3.07183e-06	3.38268e-06	3.76526e-06	2.76359e-06	6.61757e-06	4.60928e-06	2.97922e-06	3.27726e-06
Actinomadura_sp._NEAU-AAG5	5.82921e-06	6.52996e-06	1.19906e-05	6.84329e-06	9.04186e-06	1.13215e-05	8.47967e-06	1.13607e-05	1.40768e-05	1.12268e-05	9.76933e-06	1.10084e-05	5.82905e-06	7.75713e-06	8.55511e-06	7.37604e-06	5.81286e-06	8.85255e-06	2.89743e-06	5.51306e-06	8.32149e-06	5.63111e-06	1.3599e-05	5.99168e-06
Actinomadura_sp._NEAU-G17	7.31378e-06	9.39914e-06	1.05547e-05	8.90237e-06	1.69967e-05	1.82902e-05	1.77354e-05	1.77168e-05	7.88097e-06	7.59112e-06	9.54888e-06	5.21529e-06	7.14633e-06	9.85066e-06	6.9831e-06	9.39681e-06	5.91184e-06	5.36203e-06	4.10495e-06	5.50485e-06	6.17847e-06	5.96777e-06	6.08896e-06	5.80454e-06
Actinomadura_sp._RB29	5.21503e-06	9.78778e-06	1.07088e-05	7.78934e-06	1.23541e-05	1.18541e-05	1.49286e-05	1.04788e-05	5.39755e-06	6.94467e-06	5.62549e-06	6.57563e-06	6.05739e-06	9.02465e-06	6.44093e-06	6.19753e-06	8.4074e-06	1.048e-05	6.98099e-06	3.26187e-06	4.51872e-06	6.65359e-06	1.02774e-05	6.60699e-06
Actinomadura_sp._RB68	9.28168e-06	1.52606e-05	1.57095e-05	1.44489e-05	1.68108e-05	1.84849e-05	1.80204e-05	1.59266e-05	1.35924e-05	9.13516e-06	1.3282e-05	9.15953e-06	8.28921e-06	1.38129e-05	7.86951e-06	1.48079e-05	8.81989e-06	6.62493e-06	4.04065e-06	5.5863e-06	7.46282e-06	4.59252e-06	7.44457e-06	8.81929e-06
Actinomadura_sp._SoC090715LN-10	0	0	0	0	0	3.4558e-07	0	1.92376e-07	0	0	0	0	0	0	0	0	0	0	0	0	0	0	2.21939e-07	4.92336e-07
Actinomadura_sp._WAC_06369	2.79154e-06	4.85253e-06	4.08407e-06	4.4405e-06	4.38366e-06	7.38208e-06	4.64518e-06	8.63459e-06	9.23063e-06	6.89876e-06	6.37075e-06	5.95429e-06	7.14105e-06	5.49066e-06	6.20963e-06	5.38866e-06	3.85509e-06	2.70353e-06	2.88389e-06	2.50219e-06	1.84708e-06	1.29746e-06	3.1336e-06	2.62752e-06
Actinomadura_sp._WMMA1423	5.41696e-06	8.64351e-06	9.44627e-06	5.6001e-06	9.7736e-06	1.19524e-05	8.24265e-06	1.04706e-05	2.87963e-05	2.50286e-05	2.58352e-05	2.06686e-05	1.23718e-05	1.03886e-05	6.43689e-06	8.15709e-06	7.15531e-06	6.22714e-06	9.26851e-06	7.06904e-06	6.28561e-06	4.68511e-06	6.39281e-06	5.83181e-06
Actinomadura_sp._WMMB_499	7.68054e-06	8.36692e-06	4.36456e-06	7.27096e-06	1.12861e-05	9.40308e-06	1.36914e-05	1.25769e-05	1.22441e-05	1.16965e-05	7.4917e-06	8.34937e-06	4.31602e-06	4.60145e-06	5.84902e-06	6.81352e-06	6.84133e-06	6.16552e-06	3.25132e-06	4.76426e-06	4.45729e-06	5.27556e-06	6.66811e-06	4.20157e-06
Actinomadura_sp._XM-4-3	0	0	0	0	2.79674e-07	0	0	0	0	1.06764e-07	0	0	0	0	0	0	0	0	0	0	0	0	0	0
Actinomadura_syzygii	8.01388e-06	6.79581e-06	8.08551e-06	7.23338e-06	1.02536e-05	9.60663e-06	8.76634e-06	1.39627e-05	1.20795e-05	8.4644e-06	1.35899e-05	9.65484e-06	5.86878e-06	6.1045e-06	6.86199e-06	5.59193e-06	5.71406e-06	4.25591e-06	3.07717e-06	4.36083e-06	4.44702e-06	4.05793e-06	6.1131e-06	5.73994e-06
Actinomadura_umbrina	8.06321e-06	9.22867e-06	1.4701e-05	9.22659e-06	1.51812e-05	1.80005e-05	2.00454e-05	1.96241e-05	1.21558e-05	1.12765e-05	1.27733e-05	9.71871e-06	1.21773e-05	1.05472e-05	1.22389e-05	1.16835e-05	1.03999e-05	1.30926e-05	1.50372e-05	8.02684e-06	7.21594e-06	7.33759e-06	1.11997e-05	8.75271e-06
Actinomadura_verrucosospora	9.2319e-06	1.01084e-05	1.56969e-05	1.55723e-05	1.44737e-05	2.08284e-05	1.47267e-05	1.94714e-05	1.43127e-05	9.15843e-06	1.21025e-05	1.22776e-05	9.83024e-06	1.50295e-05	1.18049e-05	1.09142e-05	7.92415e-06	7.31324e-06	7.15564e-06	5.9877e-06	9.33003e-06	3.10361e-06	9.12524e-06	8.43872e-06
Actinomadura_viridilutea	0	2.95801e-07	1.06251e-06	7.35533e-08	7.47847e-08	2.75641e-07	1.86951e-07	1.32337e-06	4.73312e-07	4.51711e-07	4.59273e-07	3.22953e-07	0	4.06211e-07	2.46205e-07	7.22358e-08	0	1.62547e-06	0	1.4944e-07	3.30931e-07	2.27855e-07	0	2.74301e-07
Actinomyces_bouchesdurhonensis	1.40971e-07	2.17387e-07	1.60349e-07	1.28125e-07	2.8429e-07	3.03946e-07	7.54588e-07	6.17155e-07	4.13932e-08	0	0	3.75042e-08	0	1.82576e-07	1.15912e-07	3.92248e-08	0	0	0	0	0	0	0	0
Actinomyces_bowdenii	1.90004e-07	1.77962e-07	0	2.90625e-07	9.24096e-07	4.39915e-07	1.90181e-07	4.68019e-07	3.89829e-07	9.99199e-08	0	0	7.1056e-07	8.1549e-07	1.8427e-07	1.08893e-07	1.05863e-07	4.63708e-07	1.56869e-07	7.19571e-07	0	0	0	0
Actinomyces_culturomici	0	2.19112e-07	8.67004e-08	5.5165e-07	4.72598e-07	4.35081e-07	3.24892e-07	6.25222e-07	2.09976e-07	6.71013e-07	2.05544e-07	2.71362e-07	1.66675e-07	0	1.71758e-07	4.76176e-06	4.02681e-07	7.73329e-07	0	1.19948e-06	1.60451e-07	3.03807e-07	7.86874e-08	2.2858e-07
Actinomyces_dentalis	1.02464e-06	6.79715e-07	0	0	1.90021e-06	8.051e-07	6.09974e-07	6.42459e-07	2.49478e-07	0	8.66276e-08	0	8.44189e-07	1.95168e-07	1.79719e-07	9.8592e-08	3.93086e-07	2.42657e-07	1.05416e-06	1.39478e-07	0	5.64506e-07	4.65356e-07	1.28007e-07
Actinomyces_denticolens	0	1.6264e-07	0	0	1.40318e-07	0	8.03857e-08	0	7.93725e-08	0	0	4.38581e-07	1.83406e-07	1.40038e-07	0	0	0	0	2.32877e-07	0	1.81955e-07	2.78176e-07	0	2.96924e-07
Actinomyces_gaoshouyii	0	2.10347e-07	7.71361e-07	7.15654e-08	0	2.20513e-07	4.15862e-07	0	0	2.07462e-07	0	4.18008e-07	0	9.70262e-08	2.01352e-07	0	1.39135e-07	0	4.84052e-07	4.18433e-07	6.48759e-07	3.16665e-07	1.15408e-07	0
Actinomyces_gerencseriae	0	9.73831e-08	0	3.3099e-07	0	0	4.68615e-07	6.70887e-07	0	0	9.30444e-08	0	3.45881e-07	1.677e-07	0	7.14955e-07	3.60719e-07	0	1.39439e-07	1.29146e-07	0	0	0	0
Actinomyces_glycerinitolerans	0	0	0	1.08819e-07	2.79674e-07	0	0	0	0	0	0	0	0	0	0	0	0	0	0	0	0	0	0	0
Actinomyces_graevenitzii	1.91384e-07	4.64002e-07	0	0	1.81478e-07	2.16405e-07	1.61925e-07	2.20667e-07	8.27863e-08	6.60495e-07	3.44054e-07	3.20725e-07	5.38776e-08	7.51842e-07	2.87461e-07	0	5.38242e-07	1.11967e-06	4.2765e-07	1.20323e-06	3.74798e-07	1.17219e-06	8.22953e-07	8.79825e-07
Actinomyces_howellii	0	3.27239e-07	0	3.35019e-07	0	1.80645e-07	0	0	0	0	0	4.21579e-08	0	0	0	1.87072e-07	1.24864e-07	0	8.68811e-07	0	1.01038e-06	2.08867e-07	3.24586e-07	7.29272e-07
Actinomyces_israelii	1.6558e-06	5.86836e-07	3.47109e-07	3.75311e-07	4.30722e-08	4.61646e-07	4.89693e-07	1.68732e-07	1.10674e-06	5.92329e-07	8.50548e-07	1.24965e-06	9.86492e-08	2.54798e-07	5.95901e-07	2.99837e-07	5.19436e-07	4.77783e-07	6.5632e-07	5.89343e-07	0	3.53015e-07	4.81138e-07	1.28007e-07
Actinomyces_liubingyangii	5.06527e-07	2.60045e-07	8.19366e-08	4.52165e-07	0	3.21582e-07	5.52461e-07	7.70042e-07	8.46058e-08	0	3.6902e-07	0	0	4.99125e-07	0	3.12344e-07	1.01452e-07	4.95442e-07	0	1.08967e-07	0	1.78838e-07	0	0
Actinomyces_massiliensis	0	0	3.8042e-07	8.10587e-08	1.38886e-07	4.24181e-07	7.16482e-07	9.37834e-08	3.29963e-07	0	0	3.67146e-07	0	0	1.48192e-07	9.59975e-08	1.01452e-07	5.15781e-07	0	0	0	0	9.01627e-08	0
Actinomyces_mediterranea	9.39804e-08	0	4.81047e-07	1.96142e-07	0	0	1.58259e-07	3.70502e-07	1.06932e-07	1.67608e-07	0	1.50017e-07	7.53128e-08	2.72512e-07	1.88536e-07	4.72513e-07	5.10534e-07	4.70149e-07	0	1.45289e-07	4.04471e-08	1.16037e-07	2.35625e-07	0
Actinomyces_minihominis	1.06588e-07	0	9.09297e-08	0	3.3736e-07	1.23205e-07	0	1.07181e-07	2.99966e-07	3.03653e-07	3.22997e-07	0	0	4.24893e-07	0	0	0	2.75209e-07	0	1.27571e-07	1.0762e-07	0	0	2.49365e-07
Actinomyces_naeslundii	6.48705e-07	7.89735e-07	7.80571e-07	4.65465e-07	5.10078e-07	4.09515e-07	5.69154e-07	9.29478e-07	4.30103e-07	4.10243e-07	8.25399e-07	7.38301e-07	5.19684e-07	4.14191e-07	8.27697e-07	2.54056e-07	0	4.19694e-07	4.26909e-07	0	1.03821e-07	3.10754e-07	0	5.2847e-07
Actinomyces_oricola	0	1.12686e-07	0	0	0	0	1.11392e-07	0	1.09988e-07	0	0	0	2.00117e-07	3.7161e-07	0	0	0	0	0	0	0	0	7.31461e-07	0
Actinomyces_oris	1.26721e-06	1.18757e-06	3.29415e-06	1.02139e-06	6.85242e-07	2.8963e-07	7.49751e-08	6.82628e-07	9.62172e-07	9.14531e-07	5.29571e-07	6.83623e-07	1.55902e-06	1.15483e-06	1.67906e-06	2.87302e-07	9.93818e-08	1.60315e-06	5.70131e-07	1.26131e-06	2.07292e-06	1.03388e-06	4.41957e-07	1.23473e-06
Actinomyces_polynesiensis	0	0	1.07244e-06	0	0	0	3.6267e-07	9.77189e-08	1.38446e-06	1.18888e-06	8.86756e-07	1.06777e-06	6.70888e-07	4.50618e-07	1.97432e-07	1.01331e-07	0	0	0	0	0	0	0	1.34086e-08
Actinomyces_provencensis	3.71849e-07	4.64002e-07	3.03079e-07	4.02215e-07	3.45111e-07	2.11195e-07	7.67508e-07	5.84177e-07	7.40301e-08	1.14614e-07	1.833e-07	6.89527e-07	0	5.77914e-07	2.68766e-07	6.61645e-07	2.86453e-07	0	6.64385e-07	7.69179e-07	3.7288e-07	2.45726e-07	0	1.41185e-07
Actinomyces_qiguomingii	7.47024e-08	6.74191e-08	0	1.35791e-07	5.66555e-07	0	6.66445e-08	2.34442e-07	0	0	0	0	8.64703e-08	0	0	0	0	0	0	0	0	4.77411e-07	0	0
Actinomyces_radicidentis	3.64174e-07	0	0	8.27474e-08	1.41779e-07	0	2.92403e-07	0	4.86315e-07	5.80386e-07	4.55336e-07	1.46875e-07	0	7.07483e-08	0	0	0	1.41045e-07	0	0	0	6.09196e-07	0	1.00006e-07
Actinomyces_ruminicola	4.54035e-07	3.28668e-07	0	0	6.31047e-07	9.83661e-07	2.15933e-07	0	3.39667e-07	7.02011e-07	3.3746e-07	5.55557e-07	2.75624e-07	6.35622e-07	2.43051e-07	2.14583e-07	0	0	0	3.12264e-07	3.78036e-07	0	0	0
Actinomyces_slackii	4.00877e-07	2.25372e-07	5.99927e-07	6.4997e-07	3.42896e-07	9.83136e-07	0	4.0555e-07	8.84957e-08	9.00072e-07	1.01846e-07	8.8072e-07	5.59381e-08	4.82639e-07	4.76244e-07	8.05003e-07	1.24864e-07	0	0	0	1.01435e-07	3.34736e-07	0	0
Actinomyces_sp.	3.32881e-05	3.03541e-05	2.99308e-05	3.73074e-05	4.22182e-05	4.398e-05	4.46042e-05	4.38587e-05	4.57457e-05	4.60043e-05	4.37813e-05	4.38836e-05	3.98842e-05	3.26662e-05	3.67947e-05	3.0304e-05	5.43185e-05	5.6101e-05	6.03131e-05	5.77242e-05	3.7758e-05	2.78181e-05	3.30301e-05	4.15712e-05
Actinomyces_sp._2119	0	0	4.08561e-07	0	0	0	0	0	0	0	0	1.62227e-07	0	1.5795e-07	3.63875e-07	1.6967e-07	0	0	3.0944e-07	2.43275e-07	1.20888e-07	1.94295e-07	0	5.58171e-07
Actinomyces_sp._2129	0	0	0	0	0	0	0	0	2.23163e-07	0	1.09226e-07	4.0018e-07	2.03017e-07	0	0	7.26938e-07	0	0	0	0	0	0	1.20217e-07	5.33364e-07
Actinomyces_sp._299	0	0	0	0	0	0	0	0	0	0	0	0	0	0	2.76405e-07	0	0	0	0	0	0	0	0	0
Actinomyces_sp._340	0	0	0	0	0	0	5.34069e-07	0	0	0	0	0	0	0	0	0	0	0	0	0	0	0	0	0
Actinomyces_sp._432	0	0	0	5.97275e-08	3.05484e-07	1.15193e-07	1.75881e-07	1.60803e-07	2.11903e-07	0	0	4.03035e-07	3.13616e-07	0	0	3.15544e-07	1.15945e-07	1.34328e-07	0	6.62078e-07	0	0	0	0
Actinomyces_sp._C10	0	0	0	0	0	0	0	0	0	0	0	0	0	1.01371e-07	4.29047e-07	0	0	0	0	0	0	0	0	0
Actinomyces_sp._CtC_72	0	0	8.57038e-08	0	0	0	0	0	0	0	0	0	0	0	0	0	0	6.48481e-07	0	0	0	0	0	0
Actinomyces_sp._HMSC035G02	0	0	0	0	0	0	0	0	0	0	0	0	0	0	0	0	0	0	4.98289e-07	3.07672e-07	0	0	0	0
Actinomyces_sp._HMSC062G12	8.24545e-08	0	2.59107e-07	0	0	0	0	0	4.37639e-07	2.20578e-07	1.422e-07	0	0	0	6.77975e-08	0	0	0	0	0	0	2.36453e-07	8.16568e-08	0
Actinomyces_sp._HMSC065F11	0	0	0	0	0	0	0	0	0	0	0	0	9.21591e-08	0	0	0	0	0	5.9445e-07	1.37643e-07	0	0	0	3.78969e-07
Actinomyces_sp._HMSC065F12	0	0	0	8.4508e-08	0	0	8.29512e-08	0	0	0	3.18448e-07	2.22631e-07	0	0	0	0	0	0	1.20155e-07	0	0	0	2.28821e-07	0
Actinomyces_sp._HMSC075B09	0	0	0	3.35652e-07	4.59825e-07	3.17176e-07	3.19905e-07	1.01387e-07	0	0	0	0	3.81193e-07	0	0	0	0	0	4.64159e-07	0	0	0	0	0
Actinomyces_sp._HMSC08A01	0	0	0	0	0	0	0	0	0	0	0	0	0	1.32308e-07	2.79995e-07	0	0	0	0	0	0	0	0	0
Actinomyces_sp._ICM47	0	0	1.84105e-07	9.80711e-08	0	6.16767e-07	0	3.04162e-07	0	0	8.56432e-08	4.03201e-07	0	7.718e-08	0	0	3.60719e-07	1.39303e-07	1.39439e-07	1.29146e-07	0	0	0	0
Actinomyces_sp._ICM58	0	0	0	0	2.92706e-07	0	1.67686e-07	6.28449e-07	0	0	0	0	0	2.19091e-07	0	1.51408e-07	1.04725e-07	0	0	0	9.48906e-08	0	0	0
Actinomyces_sp._S4-C9	2.53339e-07	0	0	0	0	0	0	0	0	3.38859e-07	0	3.03295e-07	0	0	0	0	0	0	0	0	0	0	2.50887e-07	0
Actinomyces_sp._UMB0918	2.18504e-07	6.71008e-07	0	1.08097e-07	0	0	0	0	7.54817e-08	0	7.38882e-08	1.55587e-07	2.65966e-07	6.65866e-08	1.92486e-07	2.14583e-07	0	2.82089e-07	4.23545e-07	0	7.17794e-07	0	0	0
Actinomyces_sp._Z3	8.74018e-08	0	7.45623e-08	0	8.61444e-08	7.71796e-08	2.14585e-07	0	0	0	0	0	0	3.93755e-07	0	0	1.94788e-07	0	0	0	0	6.26351e-07	4.32781e-10	3.65301e-07
Actinomyces_sp._Z5	0	0	0	3.55691e-07	0	0	0	0	0	0	0	0	0	0	2.14523e-07	0	1.45364e-07	0	0	0	0	0	0	0
Actinomyces_sp._ZJ293	0	0	2.79609e-07	0	0	9.64745e-08	1.01265e-07	9.74373e-08	2.26257e-07	0	0	4.77793e-07	3.70587e-08	0	3.22508e-07	0	3.74999e-07	5.86944e-07	5.05278e-07	9.72081e-07	4.2023e-07	3.35471e-07	1.00736e-06	3.89762e-07
Actinomyces_sp._ZJ308	0	0	0	0	0	0	0	0	2.26445e-07	0	0	2.0517e-07	0	0	0	4.29165e-07	0	0	0	0	0	0	0	0
Actinomyces_sp._ZJ34	0	0	0	1.05917e-07	0	0	5.19827e-07	0	0	0	0	0	0	0	0	2.16878e-07	1.0252e-07	0	0	0	0	0	0	0
Actinomyces_sp._ZJ561	0	0	0	0	0	0	0	0	0	1.11339e-06	2.93634e-07	9.05945e-08	0	0	0	0	0	0	0	0	0	0	0	0
Actinomyces_sp._ZJ751	0	0	0	0	0	0	0	1.07181e-07	0	0	0	0	0	5.82157e-07	1.02665e-07	0	0	0	0	0	0	0	0	0
Actinomyces_sp._dk561	4.13365e-07	0	1.0885e-07	0	9.9349e-08	3.13338e-07	5.69154e-08	1.33788e-07	0	1.41603e-07	0	1.51647e-07	5.67899e-07	1.47649e-07	2.09826e-07	2.6627e-07	0	1.22648e-07	0	0	1.91844e-07	0	9.40828e-08	4.17415e-07
Actinomyces_sp._oral_taxon_169	0	0	0	0	0	0	0	0	4.25366e-08	7.54444e-07	0	0	0	0	0	0	0	0	0	0	0	0	0	0
Actinomyces_sp._oral_taxon_170	1.21391e-07	0	0	0	0	1.07194e-07	4.88659e-07	1.04204e-07	0	4.19785e-07	1.04675e-07	9.33223e-08	0	3.17613e-07	9.9813e-08	2.02661e-07	4.05809e-07	0	0	2.90579e-07	1.22567e-07	1.16037e-07	0	0
Actinomyces_sp._oral_taxon_171	0	0	0	0	0	0	0	0	4.00082e-07	1.1055e-07	4.27608e-07	9.89472e-08	2.48372e-07	0	5.09683e-08	0	6.90739e-08	0	0	0	0	0	0	3.83273e-07
Actinomyces_sp._oral_taxon_178	1.4567e-07	1.31467e-07	0	1.00554e-07	3.42424e-07	0	6.49784e-08	5.00178e-07	0	0	9.54e-08	2.64903e-07	0	1.94926e-07	5.98878e-08	1.21597e-07	1.23284e-07	0	0	0	0	0	0	0
Actinomyces_sp._oral_taxon_414	0	1.79632e-07	6.10018e-07	4.6265e-08	1.26316e-06	1.04297e-07	1.44397e-07	6.53971e-07	0	1.64079e-07	0	3.63892e-07	1.73786e-07	1.94052e-07	0	7.6798e-08	0	0	0	2.20228e-07	1.85786e-07	0	0	0
Actinomyces_sp._oral_taxon_448	0	6.03086e-07	6.65735e-08	0	2.87553e-07	0	2.24663e-07	2.00964e-07	0	2.19542e-07	0	0	0	1.21283e-07	0	0	0	0	0	0	0	0	0	0
Actinomyces_sp._oral_taxon_848	0	0	0	0	0	0	0	0	0	0	1.06149e-07	0	0	0	0	0	2.7435e-07	0	0	0	3.7288e-07	4.43179e-07	3.56231e-07	0
Actinomyces_sp._oral_taxon_849	4.09441e-07	1.70887e-07	6.80723e-07	7.42407e-08	4.40546e-07	1.68605e-07	2.91492e-07	9.56296e-07	9.76876e-07	3.64194e-07	6.69172e-07	3.82565e-07	1.95175e-07	7.38742e-07	7.81673e-07	4.32123e-07	9.10226e-07	7.38178e-07	7.38895e-07	4.88824e-07	2.7526e-07	7.80812e-08	2.42681e-07	4.48624e-07
Actinomyces_sp._oral_taxon_877	0	0	0	3.45381e-07	0	4.00933e-07	2.0253e-07	0	2.33307e-07	2.36174e-07	0	0	2.12245e-07	0	0	1.05736e-07	0	0	0	0	0	0	0	1.39138e-07
Actinomyces_sp._oral_taxon_897	3.08477e-07	2.78401e-07	4.38602e-07	2.00804e-07	3.20255e-07	3.63198e-07	4.72307e-07	4.41333e-07	0	0	0	0	9.46499e-08	4.35153e-07	5.57556e-07	0	1.31614e-07	6.35694e-07	7.9539e-07	1.10691e-06	0	2.35343e-07	0	1.35219e-07
Actinomyces_sp._zg-325	0	1.69635e-07	0	1.12825e-06	0	1.65978e-07	1.4032e-06	3.22695e-07	1.92478e-07	2.29228e-07	3.7683e-07	0	0	7.39112e-07	1.54549e-07	0	7.74726e-07	1.28222e-07	0	0	1.00282e-07	0	9.83593e-08	0
Actinomyces_sp._zg-332	0	0	0	1.96953e-07	1.68729e-07	6.37848e-08	6.44414e-08	0	0	0	0	1.15302e-07	1.1577e-07	5.61309e-08	0	0	8.0491e-08	0	0	0	0	0	1.43068e-07	0
Actinomyces_sp._zg296	0	0	0	0	0	0	0	0	0	0	0	0	1.65451e-07	0	0	0	1.53377e-07	5.33082e-07	0	1.64738e-07	0	0	0	0
Actinomyces_sp._zg328	0	0	0	0	0	0	0	0	3.94827e-07	0	2.89869e-07	0	0	0	0	0	0	1.44661e-07	0	2.68226e-07	0	0	1.10969e-07	0
Actinomyces_succiniciruminis	0	0	0	0	0	0	0	0	0	0	0	0	0	0	0	0	0	4.02985e-07	1.25495e-07	0	0	2.7849e-07	1.92347e-07	0
Actinomyces_tangfeifanii	0	0	0	0	0	0	9.50904e-08	0	0	0	0	0	0	0	7.01125e-07	0	0	6.73646e-07	0	0	0	0	0	0
Actinomyces_timonensis	4.60009e-07	0	8.87647e-08	0	1.7909e-07	5.60954e-07	3.71305e-07	8.93175e-08	2.02609e-07	4.00431e-07	1.88887e-07	8.20495e-07	2.76477e-07	1.1135e-07	1.80114e-07	0	7.32287e-07	1.34328e-07	1.34459e-07	1.24534e-07	3.48348e-07	2.55807e-07	3.09129e-07	2.38975e-07
Actinomyces_urogenitalis	4.1223e-07	4.19576e-08	2.77626e-07	0	5.88817e-07	1.44348e-07	4.25013e-07	5.97482e-07	2.64116e-07	5.04683e-07	5.14333e-08	3.71052e-08	1.30954e-07	5.8269e-07	5.79559e-08	3.50519e-07	5.18054e-08	0	0	0	0	0	2.79213e-07	0
Actinomyces_virus_Av1	0	0	2.72789e-07	0	0	0	0	0	0	0	0	0	0	0	0	0	0	0	0	0	0	0	0	0
Actinomyces_viscosus	2.36221e-07	0	0	0	0	0	0	0	0	0	0	0	2.8395e-07	0	0	0	0	0	0	0	0	0	0	0
Actinomyces_vulturis	1.10635e-07	0	2.95882e-07	0	4.00227e-07	2.18838e-08	9.87014e-08	2.71492e-07	9.74573e-08	9.86551e-08	2.59239e-07	0	1.77319e-07	1.71945e-07	0	3.56358e-07	1.07027e-07	3.67943e-07	4.96464e-07	2.4737e-07	1.91844e-07	2.11511e-07	0	1.04354e-07
Actinomycetaceae_bacterium	0	0	3.24184e-07	0	9.86291e-08	3.04656e-07	0	1.04204e-07	0	0	0	2.90657e-07	2.95176e-07	2.82993e-07	1.99626e-07	2.02661e-07	0	0	0	0	1.22567e-07	0	0	0
Actinomycetaceae_bacterium_WB03_NA08	1.26669e-07	3.33297e-07	5.73557e-07	0	0	0	1.09823e-07	0	3.34745e-07	1.09771e-07	0	1.99308e-07	0	0	4.04875e-07	1.05736e-07	0	4.83582e-07	0	0	1.26069e-07	9.54822e-07	5.91523e-07	5.42808e-07
Actinomycetales_bacterium	3.81781e-05	4.26011e-05	3.61942e-05	4.1258e-05	5.48234e-05	4.95861e-05	6.31585e-05	4.68798e-05	4.06087e-05	4.5105e-05	5.47152e-05	4.5535e-05	8.39218e-05	7.63934e-05	7.02759e-05	7.19399e-05	4.47659e-05	4.81733e-05	4.78499e-05	4.48937e-05	3.91105e-05	3.5698e-05	4.67546e-05	4.95051e-05
Actinomycetales_bacterium_JB111	9.23944e-07	1.09544e-06	1.29815e-07	6.53815e-07	8.1354e-07	3.29732e-07	4.9525e-07	2.52383e-06	3.14344e-06	1.35664e-06	2.14437e-06	2.58692e-06	8.66898e-07	7.0537e-07	4.97118e-07	4.586e-07	1.48592e-06	1.08531e-06	5.74741e-07	4.19611e-07	1.22532e-06	1.50635e-06	2.21939e-07	1.68057e-06
Actinomycetales_bacterium_SN12	9.29806e-08	0	4.56298e-07	2.85616e-07	5.35544e-07	5.97934e-07	3.31805e-07	1.03162e-06	0	0	3.14025e-07	0	9.7279e-08	9.43311e-08	5.16424e-07	1.01331e-07	2.46568e-07	0	0	0	0	8.80813e-07	2.01484e-07	8.00046e-07
Actinomycetales_bacterium_TMED115	0	0	5.25087e-08	0	4.31329e-07	2.17407e-07	2.19645e-07	5.28357e-08	5.42192e-08	0	0	0	0	0	0	0	0	0	0	0	0	0	0	0
Actinomycetales_bacterium_mxb001	6.04761e-06	6.94249e-06	4.04112e-06	6.9153e-06	1.02086e-05	1.21742e-05	9.63854e-06	1.20789e-05	3.36041e-06	3.76301e-06	4.93169e-06	3.46927e-06	4.2461e-06	5.76191e-06	5.99718e-06	5.02856e-06	4.42181e-06	4.7251e-06	3.0094e-06	4.20929e-06	2.88755e-06	3.33359e-06	4.13236e-06	4.00464e-06
Actinomycetospora_chiangmaiensis	2.09103e-06	3.23164e-06	4.37888e-06	2.8726e-06	6.30293e-06	5.17814e-06	5.05142e-06	5.56391e-06	3.80365e-06	3.7627e-06	5.54571e-06	4.86001e-06	4.19294e-06	4.87749e-06	4.88741e-06	2.89139e-06	1.1904e-06	2.39518e-06	1.28724e-06	1.37906e-06	1.79123e-06	2.59301e-06	2.07295e-06	2.25395e-06
Actinomycetospora_cinnamomea	7.63295e-06	7.78219e-06	9.88261e-06	5.61416e-06	1.01299e-05	9.86545e-06	6.8547e-06	1.22141e-05	1.10723e-05	7.72942e-06	9.47714e-06	9.6659e-06	6.77068e-06	8.42169e-06	9.8142e-06	8.19547e-06	1.09075e-05	8.3298e-06	8.84623e-06	1.15743e-05	8.588e-06	7.32763e-06	7.17425e-06	7.91791e-06
Actinomycetospora_corticicola	2.61735e-06	2.89638e-06	2.94774e-06	3.31986e-06	4.6237e-06	3.51393e-06	5.36552e-06	7.67755e-06	3.19444e-06	5.2158e-06	3.86612e-06	2.3215e-06	3.78244e-06	3.82739e-06	3.69119e-06	4.91822e-06	5.18404e-06	3.41076e-06	3.53615e-06	3.60505e-06	2.44155e-06	1.97727e-06	2.05323e-06	4.29704e-06
Actinomycetospora_sp._TBRC_11914	1.04973e-05	8.5841e-06	9.99093e-06	7.8308e-06	1.0615e-05	1.17895e-05	8.63549e-06	1.17378e-05	5.82292e-06	9.61927e-06	7.13842e-06	7.33602e-06	7.16544e-06	7.22143e-06	9.36264e-06	1.16159e-05	6.52345e-06	1.29135e-05	7.62658e-06	6.73981e-06	5.74231e-06	3.76595e-06	6.40199e-06	6.94022e-06
Actinomycetospora_succinea	5.1557e-06	4.35605e-06	6.6892e-06	6.32248e-06	5.30678e-06	6.7165e-06	6.06112e-06	8.1891e-06	7.36426e-06	7.32463e-06	5.65664e-06	6.77671e-06	9.12044e-06	5.38067e-06	8.56126e-06	5.59775e-06	7.41433e-06	8.38971e-06	6.9501e-06	9.33502e-06	1.02504e-05	6.7873e-06	6.60757e-06	5.07772e-06
Actinophytocola_algeriensis	1.11548e-05	1.04861e-05	3.11739e-05	1.49395e-05	1.67529e-05	1.43315e-05	4.53033e-05	1.38109e-05	2.27447e-05	1.83849e-05	2.9032e-05	2.28811e-05	1.89819e-05	1.33702e-05	1.57999e-05	3.29621e-05	1.34505e-05	1.27673e-05	9.64531e-06	1.64065e-05	1.46091e-05	1.0875e-05	1.44896e-05	1.87631e-05
Actinophytocola_oryzae	1.58137e-05	1.66581e-05	4.09828e-05	2.76161e-05	4.0578e-05	2.15743e-05	8.52935e-05	2.788e-05	3.21547e-05	1.84725e-05	2.19986e-05	3.3819e-05	2.1912e-05	2.05172e-05	2.00544e-05	4.40851e-05	1.22091e-05	1.59539e-05	1.17484e-05	1.57058e-05	1.86207e-05	1.14052e-05	2.05879e-05	1.95496e-05
Actinophytocola_sp.	6.35687e-05	6.42717e-05	5.95137e-05	7.15341e-05	8.0944e-05	8.38282e-05	9.07298e-05	8.2731e-05	6.48186e-05	7.19869e-05	7.59357e-05	7.16098e-05	6.46186e-05	7.12126e-05	6.58977e-05	7.61857e-05	9.54622e-05	9.55962e-05	0.000120854	9.777e-05	6.62609e-05	5.68459e-05	6.35266e-05	6.77e-05
Actinophytocola_xanthii	1.45013e-05	1.31081e-05	1.75646e-05	1.66659e-05	1.30611e-05	1.38019e-05	1.78711e-05	1.82603e-05	1.60332e-05	1.38985e-05	1.47055e-05	1.6232e-05	1.63378e-05	1.24819e-05	1.04878e-05	2.63019e-05	1.45825e-05	1.50887e-05	1.95314e-05	1.15863e-05	1.00888e-05	1.09084e-05	1.48374e-05	1.08222e-05
Actinophytocola_xinjiangensis	9.44608e-06	1.07028e-05	1.80731e-05	1.66545e-05	1.14046e-05	1.19521e-05	1.65685e-05	1.24978e-05	1.36972e-05	1.05897e-05	8.4607e-06	1.32295e-05	1.54577e-05	1.39951e-05	9.48224e-06	3.24808e-05	1.10617e-05	1.04899e-05	9.96599e-06	1.20648e-05	8.16137e-06	8.39752e-06	1.1352e-05	7.76317e-06
Actinoplanes_abujensis	2.94668e-05	3.24955e-05	3.3617e-05	6.40642e-05	2.84727e-05	7.83614e-05	4.43142e-05	0.000192512	4.32989e-05	5.49369e-05	6.01761e-05	3.52076e-05	5.30218e-05	5.53468e-05	5.69873e-05	3.59941e-05	2.38629e-05	9.75405e-05	2.20178e-05	3.20609e-05	4.3398e-05	2.47449e-05	0.000152238	2.54046e-05
Actinoplanes_atraurantiacus	5.62376e-05	5.34323e-05	4.65911e-05	0.000103888	4.85507e-05	0.000131864	8.01559e-05	0.000298118	7.58571e-05	8.39852e-05	9.73721e-05	6.33189e-05	8.37769e-05	7.84887e-05	7.33216e-05	5.55714e-05	4.27593e-05	0.000149478	3.42736e-05	4.9527e-05	5.96795e-05	3.67019e-05	0.00027569	4.25236e-05
Actinoplanes_awajinensis	2.54807e-05	3.01415e-05	2.49997e-05	3.88907e-05	3.19936e-05	5.24727e-05	3.79977e-05	8.02046e-05	2.73418e-05	2.90668e-05	3.80863e-05	2.04182e-05	3.001e-05	2.83231e-05	2.68431e-05	2.60943e-05	1.56446e-05	4.79547e-05	1.4781e-05	1.51975e-05	3.40537e-05	1.55856e-05	6.92909e-05	1.87483e-05
Actinoplanes_brasiliensis	4.50722e-05	4.25631e-05	3.64572e-05	7.57859e-05	3.75048e-05	0.000104211	6.34982e-05	0.000217358	5.06116e-05	6.63119e-05	6.81023e-05	4.51214e-05	6.48531e-05	6.23498e-05	6.27989e-05	4.09362e-05	3.33394e-05	0.000105333	3.12161e-05	3.69777e-05	4.78184e-05	2.71541e-05	0.000178044	3.65871e-05
Actinoplanes_campanulatus	1.61294e-05	2.05257e-05	1.52696e-05	2.4874e-05	1.76208e-05	2.73881e-05	2.04464e-05	4.40084e-05	2.29265e-05	1.57528e-05	2.72681e-05	1.2763e-05	2.23213e-05	2.07018e-05	2.46012e-05	2.27581e-05	1.29677e-05	3.41212e-05	1.20051e-05	1.43352e-05	2.72712e-05	1.2677e-05	4.53105e-05	1.64629e-05
Actinoplanes_deccanensis	0	0	4.14235e-07	0	0	2.14388e-07	3.09947e-07	5.06937e-07	3.20797e-07	1.08247e-07	2.0935e-07	2.34464e-07	0	1.88662e-07	1.99626e-07	6.9836e-07	0	6.26865e-07	0	0	1.22567e-07	4.35952e-07	1.20217e-07	0
Actinoplanes_derwentensis	1.13846e-05	1.95606e-05	1.10492e-05	1.69405e-05	1.27974e-05	2.08023e-05	2.17589e-05	4.03754e-05	1.78169e-05	2.20038e-05	2.34259e-05	1.21841e-05	2.21708e-05	1.9824e-05	1.80862e-05	2.66065e-05	1.08799e-05	3.03317e-05	9.81464e-06	1.21351e-05	2.09352e-05	7.00496e-06	5.36953e-05	1.05631e-05
Actinoplanes_digitatis	4.40898e-05	0.000113577	3.79475e-05	4.14899e-05	4.0887e-05	5.53384e-05	6.03857e-05	0.000110133	4.39964e-05	3.77971e-05	6.16022e-05	3.75424e-05	4.3876e-05	5.91258e-05	4.34e-05	5.03639e-05	3.84536e-05	6.66709e-05	3.57387e-05	3.00867e-05	0.000199733	3.55106e-05	0.000104129	3.2232e-05
Actinoplanes_friuliensis	3.3983e-05	0.000120791	3.61177e-05	5.13723e-05	3.74039e-05	6.31693e-05	5.77375e-05	0.000114643	3.50541e-05	4.29058e-05	5.58105e-05	4.05245e-05	4.37234e-05	6.16138e-05	3.89682e-05	4.42154e-05	3.65588e-05	6.45257e-05	3.46401e-05	3.35008e-05	0.000243681	3.7208e-05	8.98819e-05	2.76252e-05
Actinoplanes_garbadinensis	0	1.0379e-07	2.94325e-07	0	7.16359e-07	3.25261e-07	0	2.62593e-07	3.03913e-07	0	0	0	9.21591e-08	0	0	0	0	1.82977e-07	7.85707e-07	0	0	0	6.5502e-07	0
Actinoplanes_globisporus	0.000181586	0.000180912	0.000225633	0.000471922	0.000193063	0.000871004	0.000322528	0.000828532	0.000211185	0.000218209	0.000352251	0.000166821	0.000360316	0.000209302	0.000284887	0.000165495	0.000126162	0.000461166	8.92159e-05	0.000159574	0.000166866	0.000148834	0.000894424	0.000213006
Actinoplanes_italicus	1.63749e-05	2.25515e-05	1.77819e-05	2.25828e-05	1.76281e-05	2.76974e-05	2.36634e-05	5.46924e-05	2.20856e-05	2.22888e-05	2.89133e-05	1.80863e-05	2.35126e-05	2.04794e-05	3.16268e-05	2.08604e-05	2.0622e-05	5.16017e-05	2.52676e-05	1.57585e-05	3.31228e-05	1.39075e-05	6.12421e-05	1.43048e-05
Actinoplanes_liguriensis	0	0	1.05017e-07	0	0	2.17407e-07	0	0	9.41389e-07	3.29313e-07	0	0	0	9.56597e-08	0	0	0	1.23995e-07	0	0	0	0	2.8535e-07	0
Actinoplanes_lobatus	1.61877e-05	1.92576e-05	1.44223e-05	2.14918e-05	2.00879e-05	2.94977e-05	2.15842e-05	5.52732e-05	1.69259e-05	1.72364e-05	2.47319e-05	1.85066e-05	1.6908e-05	1.67755e-05	1.89683e-05	1.99673e-05	1.62922e-05	3.67249e-05	1.69477e-05	1.03107e-05	2.85299e-05	8.31634e-06	6.3962e-05	1.30475e-05
Actinoplanes_lutulentus	1.49427e-05	1.68131e-05	1.3948e-05	2.13194e-05	1.46432e-05	2.78207e-05	2.51707e-05	5.3334e-05	1.68983e-05	1.78852e-05	2.16301e-05	1.81948e-05	1.75211e-05	2.335e-05	1.77269e-05	1.3391e-05	1.10849e-05	3.19296e-05	9.64546e-06	7.99736e-06	1.91281e-05	1.20178e-05	4.36274e-05	1.03836e-05
Actinoplanes_missouriensis	1.54234e-05	1.9716e-05	1.49626e-05	2.75077e-05	1.58436e-05	3.05353e-05	2.44684e-05	6.09518e-05	1.60695e-05	2.22289e-05	3.0136e-05	1.81397e-05	1.93727e-05	1.93195e-05	2.49006e-05	2.01833e-05	1.01387e-05	3.87477e-05	1.1843e-05	1.00578e-05	2.6985e-05	1.34839e-05	5.60097e-05	1.47451e-05
Actinoplanes_octamycinicus	2.75258e-05	2.77537e-05	2.25722e-05	3.59459e-05	2.55059e-05	5.20902e-05	3.57859e-05	7.76971e-05	2.71859e-05	3.12473e-05	3.81028e-05	2.64152e-05	3.22285e-05	3.25467e-05	3.11638e-05	3.01075e-05	1.82594e-05	4.72387e-05	1.65269e-05	2.36774e-05	3.15213e-05	1.49393e-05	7.5656e-05	2.2504e-05
Actinoplanes_phage_phiAsp2	1.24604e-06	1.74752e-06	2.62362e-06	1.91386e-06	1.26265e-06	5.12489e-07	2.0203e-06	8.39147e-07	1.60751e-06	1.80387e-06	2.95553e-06	4.28393e-06	4.28584e-06	2.52152e-06	1.53784e-06	4.19844e-06	4.37193e-06	3.32419e-06	8.85397e-07	3.29552e-06	9.49807e-06	6.38102e-06	4.69356e-06	3.09782e-06
Actinoplanes_philippinensis	1.63706e-05	2.20581e-05	1.43736e-05	2.57409e-05	1.96684e-05	2.68581e-05	2.63851e-05	4.72333e-05	2.03706e-05	2.18604e-05	3.00333e-05	1.73523e-05	2.08186e-05	2.30934e-05	4.52749e-05	1.86898e-05	1.37874e-05	4.15228e-05	1.56826e-05	1.60609e-05	3.39405e-05	1.23073e-05	5.45611e-05	1.644e-05
Actinoplanes_rectilineatus	1.57831e-05	2.02834e-05	2.06575e-05	2.24247e-05	1.65222e-05	2.39555e-05	2.99412e-05	5.93858e-05	1.7036e-05	2.31056e-05	2.87003e-05	1.84387e-05	2.24884e-05	2.05539e-05	2.26942e-05	1.89523e-05	1.12695e-05	2.7286e-05	1.14314e-05	1.16223e-05	2.52093e-05	1.06506e-05	4.9862e-05	1.17395e-05
Actinoplanes_regularis	2.13544e-05	2.91467e-05	2.18843e-05	3.25568e-05	2.86941e-05	3.44973e-05	3.41544e-05	9.00285e-05	2.8074e-05	3.7203e-05	3.36204e-05	2.32027e-05	2.72972e-05	3.24759e-05	2.79082e-05	2.37315e-05	2.05049e-05	3.62327e-05	1.94598e-05	2.02719e-05	3.26424e-05	1.62158e-05	6.94502e-05	1.99336e-05
Actinoplanes_sp._ATCC_53533	6.97903e-05	0.000188201	6.71874e-05	8.03413e-05	5.79703e-05	0.000107644	9.64009e-05	0.000181588	6.21457e-05	7.11262e-05	9.7056e-05	7.51553e-05	6.75597e-05	0.000100145	6.83407e-05	7.11616e-05	7.33815e-05	0.000125127	5.60011e-05	6.19267e-05	0.000393755	7.04815e-05	0.000198066	5.64795e-05
Actinoplanes_sp._LAM7112	3.2053e-05	3.88412e-05	3.09756e-05	6.04578e-05	3.25887e-05	7.8189e-05	6.02229e-05	0.00020679	4.28789e-05	5.6826e-05	6.29399e-05	4.02416e-05	5.65755e-05	5.27375e-05	4.42988e-05	3.35419e-05	2.47308e-05	9.0327e-05	2.72934e-05	2.63039e-05	4.21381e-05	2.46211e-05	0.000157222	2.53141e-05
Actinoplanes_sp._MN07-A0364	0	0	0	0	0	0	0	1.4906e-07	0	0	0	0	0	0	1.42779e-07	0	0	7.47256e-08	0	0	5.84425e-08	0	4.58576e-07	1.2716e-07
Actinoplanes_sp._N902-109	2.87574e-05	3.91387e-05	2.76821e-05	3.43721e-05	3.20473e-05	6.06611e-05	4.43776e-05	0.000112842	2.95769e-05	3.48136e-05	4.78384e-05	3.33205e-05	3.23947e-05	3.58169e-05	3.32197e-05	2.76294e-05	1.82846e-05	4.32807e-05	2.27857e-05	1.43342e-05	5.5895e-05	1.54201e-05	4.50301e-05	2.119e-05
Actinoplanes_sp._OR16	1.8245e-05	1.9758e-05	2.73152e-05	2.42736e-05	1.70703e-05	3.30688e-05	2.48235e-05	4.98171e-05	2.14406e-05	2.19734e-05	2.44745e-05	1.96718e-05	2.35109e-05	2.06533e-05	2.38872e-05	1.66774e-05	1.5145e-05	3.40132e-05	1.36349e-05	1.71599e-05	2.20885e-05	1.5482e-05	5.14024e-05	1.74629e-05
Actinoplanes_sp._SE50	1.78724e-06	1.15308e-06	8.90151e-07	1.37773e-06	9.40063e-07	1.44627e-06	4.88456e-07	5.81099e-06	8.88213e-07	2.11584e-06	1.2987e-06	3.01893e-07	2.38696e-06	1.01586e-06	1.61152e-06	1.34618e-06	2.61785e-07	1.63912e-06	3.56711e-07	3.5985e-07	1.0882e-06	7.19822e-07	1.05522e-06	3.48927e-07
Actinoplanes_sp._SE50/110	2.07831e-05	2.05507e-05	1.69257e-05	3.0759e-05	2.0086e-05	4.01479e-05	2.9364e-05	7.57777e-05	2.3198e-05	2.49391e-05	3.51505e-05	1.93038e-05	2.87761e-05	2.33671e-05	2.56278e-05	1.97481e-05	1.23076e-05	3.02623e-05	1.17599e-05	1.39818e-05	1.96854e-05	1.12068e-05	4.98648e-05	1.25914e-05
Actinoplanes_sp._TBRC_11911	4.40542e-05	5.07013e-05	4.83813e-05	8.71179e-05	5.11309e-05	0.000135376	8.81921e-05	0.000297699	6.05365e-05	8.06221e-05	7.81238e-05	5.39414e-05	8.16096e-05	7.4872e-05	6.65758e-05	5.40206e-05	3.23375e-05	0.000112462	2.15302e-05	3.4108e-05	5.92598e-05	3.39326e-05	0.000184131	3.59621e-05
Actinoplanes_sp._TFC3	1.71568e-05	2.43517e-05	1.77788e-05	2.23712e-05	1.41572e-05	2.67658e-05	2.45182e-05	5.95987e-05	1.70177e-05	2.20106e-05	2.44201e-05	1.99774e-05	1.92222e-05	2.21164e-05	1.76312e-05	1.7557e-05	1.34575e-05	2.72207e-05	1.14646e-05	1.51651e-05	4.17367e-05	1.32162e-05	3.63777e-05	1.42833e-05
Actinoplanes_subtropicus	0.000315681	0.000366758	0.000446582	0.000624627	0.000383759	0.00134948	0.000602094	0.0014093	0.000258129	0.000262565	0.00037058	0.000226552	0.000555815	0.000291606	0.000398119	0.000235785	0.000173329	0.000438175	0.000125543	0.000198691	0.000252017	0.000211287	0.000784233	0.000428204
Actinoplanes_teichomyceticus	1.88398e-05	2.29306e-05	2.27726e-05	2.63996e-05	1.4998e-05	3.76592e-05	2.61371e-05	7.00274e-05	2.03375e-05	2.20465e-05	2.69536e-05	1.68558e-05	2.4357e-05	2.21185e-05	2.20698e-05	1.79757e-05	1.2632e-05	3.23195e-05	1.21594e-05	1.32584e-05	2.68437e-05	1.52956e-05	4.9082e-05	1.56925e-05
Actinoplanes_utahensis	1.19719e-05	1.74845e-05	1.2319e-05	1.30939e-05	1.52004e-05	2.36933e-05	1.94427e-05	3.54102e-05	1.47129e-05	1.3524e-05	1.4992e-05	1.01621e-05	1.57131e-05	1.53197e-05	1.57819e-05	1.76878e-05	9.84445e-06	3.07355e-05	1.40021e-05	1.20387e-05	1.74661e-05	9.28458e-06	3.31194e-05	9.34629e-06
Actinoplanes_xinjiangensis	1.4095e-05	1.67946e-05	1.53893e-05	2.19771e-05	1.39409e-05	2.43344e-05	1.92816e-05	4.67027e-05	2.12008e-05	1.69857e-05	3.06975e-05	1.44847e-05	1.93216e-05	1.56141e-05	4.05924e-05	1.59175e-05	1.28339e-05	3.67591e-05	1.33732e-05	1.18629e-05	2.80352e-05	1.57149e-05	5.24071e-05	1.39348e-05
Actinopolymorpha_alba	3.62292e-05	3.75472e-05	3.81225e-05	3.66252e-05	5.41736e-05	5.44408e-05	6.00007e-05	5.48279e-05	3.42392e-05	3.43573e-05	3.27802e-05	3.47426e-05	3.75524e-05	3.75915e-05	3.2766e-05	3.79316e-05	3.32673e-05	4.06035e-05	3.07339e-05	3.1222e-05	3.48774e-05	2.45526e-05	2.8818e-05	2.57673e-05
Actinopolymorpha_cephalotaxi	1.7361e-05	2.26345e-05	2.38027e-05	2.19795e-05	2.81992e-05	2.70039e-05	3.01221e-05	2.91218e-05	1.94645e-05	1.62484e-05	1.79791e-05	1.77331e-05	1.78746e-05	2.06312e-05	1.87162e-05	1.75861e-05	1.80639e-05	1.40515e-05	1.75614e-05	1.43217e-05	1.54477e-05	1.29695e-05	1.87107e-05	1.40292e-05
Actinopolymorpha_rutila	1.58743e-05	2.1959e-05	2.38629e-05	2.26364e-05	2.55512e-05	2.1479e-05	2.43707e-05	2.86697e-05	1.30897e-05	1.8422e-05	1.84918e-05	1.8971e-05	2.1477e-05	2.00598e-05	2.50624e-05	1.98452e-05	1.79716e-05	1.96743e-05	1.9269e-05	1.87733e-05	1.95062e-05	1.74246e-05	1.55478e-05	1.71233e-05
Actinopolymorpha_singaporensis	1.63066e-05	1.69636e-05	2.19304e-05	1.57903e-05	2.57425e-05	2.30647e-05	2.18917e-05	2.18464e-05	1.50929e-05	1.44807e-05	1.57538e-05	1.02942e-05	1.58946e-05	1.63628e-05	1.64762e-05	1.34303e-05	1.128e-05	1.41057e-05	1.08178e-05	1.38156e-05	1.52879e-05	1.00643e-05	1.41469e-05	1.09668e-05
Actinopolyspora_alba	1.96347e-07	7.71918e-07	6.58512e-07	7.8019e-07	6.4895e-07	1.30983e-06	1.0284e-06	2.0106e-06	1.18417e-06	1.13635e-06	1.65176e-06	1.36943e-06	1.21763e-06	9.65023e-07	2.92348e-07	1.09839e-06	5.06713e-07	4.23134e-07	7.05909e-07	1.41737e-06	1.46386e-06	0	1.16968e-07	1.23084e-07
Actinopolyspora_biskrensis	1.10609e-06	4.21988e-07	4.59273e-07	1.51257e-06	1.51395e-06	2.12406e-06	2.20049e-06	1.44519e-06	7.46195e-07	1.05621e-06	1.23132e-06	8.84995e-07	1.09013e-06	1.42859e-06	1.49565e-06	9.02497e-07	4.3426e-07	2.59156e-07	1.33231e-06	1.53731e-06	7.81946e-07	1.41538e-06	1.33133e-06	9.63874e-07
Actinopolyspora_erythraea	9.34299e-07	1.35779e-06	2.30985e-06	1.05254e-06	7.95835e-07	3.27067e-06	2.20646e-06	5.56092e-07	2.06873e-06	1.50702e-06	6.18757e-06	9.14394e-07	2.51856e-06	2.4111e-06	2.16579e-06	1.26287e-06	7.98687e-07	1.09634e-06	1.41624e-07	4.84864e-07	2.01951e-06	4.4828e-07	3.89603e-07	8.93076e-07
Actinopolyspora_halophila	1.66467e-07	8.90186e-07	3.646e-07	2.79929e-07	8.63938e-07	9.59864e-07	1.19779e-06	1.87624e-06	2.05064e-06	1.64266e-06	1.18839e-06	9.33256e-07	1.06622e-06	1.59034e-06	2.10026e-06	1.35529e-06	5.68819e-07	4.57442e-07	1.62306e-06	1.35855e-07	2.86986e-07	6.60573e-07	1.11685e-07	0
Actinopolyspora_mortivallis	2.08325e-06	1.11352e-06	3.65862e-07	1.75617e-06	2.10034e-06	3.19343e-06	1.63969e-06	1.69797e-06	1.7621e-06	2.02645e-06	1.21733e-06	9.33461e-07	8.9426e-07	1.6123e-06	2.61267e-06	1.64199e-06	2.04702e-06	2.33869e-06	1.00918e-06	1.28203e-06	7.62457e-07	9.59039e-07	2.16325e-06	9.82592e-07
Actinopolyspora_mzabensis	3.19302e-07	1.45251e-06	6.25126e-07	1.09939e-06	7.43954e-07	1.67346e-06	1.79366e-06	8.058e-07	9.38856e-07	1.76211e-06	2.26298e-06	1.39197e-06	8.59062e-07	3.44323e-07	9.91611e-07	3.85657e-07	5.45554e-07	0	5.91849e-07	6.7122e-07	1.05462e-06	4.60194e-07	8.4196e-07	9.58608e-07
Actinopolyspora_righensis	1.09252e-07	7.17702e-07	2.12096e-07	7.10586e-07	2.61902e-07	8.52826e-07	1.5529e-06	2.34252e-06	7.3982e-07	4.38541e-07	3.21693e-07	5.08464e-07	1.00392e-06	1.69796e-07	5.38333e-07	7.52942e-07	3.39747e-07	0	0	0	1.10221e-06	3.21768e-07	3.97492e-07	1.39138e-07
Actinopolyspora_saharensis	7.81683e-07	1.47543e-06	8.08996e-07	1.58976e-06	4.88721e-07	4.06425e-07	3.68032e-07	5.34003e-07	9.87068e-08	2.03837e-07	1.03241e-07	3.40764e-07	0	1.4718e-07	2.44195e-07	2.4501e-06	5.84525e-07	0	1.26905e-07	4.24088e-07	1.19254e-07	0	3.50903e-07	3.81258e-07
Actinopolyspora_sp._BKK1	2.20219e-07	3.88693e-07	4.51691e-07	0	1.46465e-06	1.42969e-07	1.89784e-06	1.5627e-06	3.9635e-07	1.92441e-07	2.96073e-07	1.66467e-07	1.85474e-07	7.7468e-07	3.11626e-07	6.88284e-08	3.29127e-07	7.25787e-07	3.83629e-07	2.96061e-07	3.24092e-07	2.69328e-07	4.64931e-07	1.34489e-06
Actinopolyspora_sp._DSM_45956	7.73467e-08	9.73831e-08	5.83745e-07	5.92818e-08	4.46492e-07	4.74924e-07	4.26098e-07	5.06937e-07	8.80956e-07	4.5579e-07	9.11991e-07	7.62283e-07	3.21697e-07	1.0836e-06	1.84543e-07	5.96775e-07	1.72379e-07	1.2566e-06	6.10516e-07	1.09578e-06	8.09919e-07	7.4496e-07	2.65607e-07	3.37607e-07
Actinopolyspora_sp._DSM_45965	6.96077e-07	7.14417e-07	1.93829e-06	4.69923e-07	5.40884e-07	2.47766e-07	3.03363e-07	1.22932e-06	9.89958e-07	1.40331e-06	2.10196e-06	1.53554e-06	1.4428e-06	1.79257e-06	1.6687e-06	1.42669e-06	7.0194e-07	3.43705e-06	8.16454e-07	3.54869e-07	5.5652e-07	6.1934e-07	4.84755e-07	5.91714e-07
Actinopolyspora_xinjiangensis	5.8003e-07	4.13105e-07	1.16222e-06	2.09082e-07	1.47661e-06	2.43314e-06	1.56581e-06	1.24871e-06	1.73987e-06	1.22367e-06	5.75831e-07	1.19151e-06	1.68967e-06	1.02921e-06	6.51137e-07	7.20745e-07	8.83979e-07	0	1.46682e-07	4.94738e-07	1.14608e-07	9.46865e-07	9.0528e-07	1.65276e-06
Actinorugispora_endophytica	3.40861e-06	4.30685e-06	2.95719e-06	5.18818e-06	4.92789e-06	5.46071e-06	6.11074e-06	4.79747e-06	2.57219e-06	3.21771e-06	4.4305e-06	3.34454e-06	4.27524e-06	3.40538e-06	3.90833e-06	2.10402e-06	4.35765e-06	4.12042e-06	3.36223e-06	5.23229e-06	3.27581e-06	3.75017e-06	5.43347e-06	4.08829e-06
Actinospica_acidiphila	5.2911e-07	1.24178e-06	1.11502e-06	9.1396e-07	2.34012e-06	1.91727e-06	2.63018e-06	1.58123e-06	1.17004e-06	1.69549e-06	1.93789e-06	2.14662e-06	1.22924e-06	2.38381e-06	2.51998e-07	1.13676e-06	1.19232e-06	5.52563e-07	5.95552e-07	1.88197e-06	2.92642e-06	1.74056e-07	1.18089e-06	4.69757e-07
Actinospica_robiniae	2.18233e-05	3.54693e-05	4.64771e-05	2.50888e-05	5.7184e-05	4.60421e-05	4.39569e-05	7.11509e-05	2.25526e-05	2.32032e-05	2.94928e-05	2.01825e-05	2.44692e-05	3.90483e-05	2.53476e-05	6.24365e-05	3.35042e-05	5.34555e-05	3.23187e-05	4.55121e-05	1.69172e-05	1.65143e-05	3.91147e-05	3.60987e-05
Actinosynnema_mirum	6.73779e-07	1.21438e-06	5.9987e-07	6.77869e-07	7.03568e-07	6.04425e-07	1.03785e-06	1.46057e-06	5.58105e-07	1.38292e-06	1.15032e-06	8.08573e-07	1.29114e-06	1.24799e-06	1.38408e-06	1.78011e-06	8.63114e-07	3.7853e-07	5.94659e-07	1.83606e-06	1.64362e-06	4.24054e-07	7.63222e-07	1.14189e-06
Actinosynnema_pretiosum	3.62342e-06	4.76137e-06	1.17123e-05	5.2836e-06	5.77562e-06	7.30916e-06	5.98307e-06	8.55826e-06	5.78114e-06	4.05364e-06	4.70602e-06	4.64436e-06	5.77775e-06	4.74096e-06	7.42169e-06	1.1561e-05	5.30438e-06	3.77844e-06	4.00779e-06	4.4649e-06	2.69254e-06	2.61816e-06	5.19504e-06	4.23815e-06
Actinosynnema_sp._ALI-1.44	5.96987e-06	6.34545e-06	1.347e-05	7.34309e-06	5.44189e-06	9.38118e-06	1.1094e-05	7.23902e-06	1.25972e-05	1.06539e-05	9.77831e-06	1.43961e-05	3.45033e-05	1.01916e-05	7.47555e-06	9.85171e-05	3.97819e-06	4.81669e-06	5.19824e-06	2.72924e-06	2.81027e-06	3.06816e-06	7.04456e-06	4.67866e-06
Actinotalea_caeni	1.38822e-06	1.55848e-06	1.2634e-06	2.4144e-06	2.00419e-06	2.19471e-06	4.034e-06	2.2527e-06	9.3917e-07	9.32839e-07	1.65116e-06	4.62094e-07	1.7887e-06	2.1475e-06	8.25161e-07	2.38395e-06	1.10764e-06	1.57218e-06	1.76944e-06	1.14492e-06	8.06612e-07	1.14293e-06	1.7334e-06	1.48952e-06
Actinotalea_fermentans	3.0635e-06	1.82416e-06	1.56101e-06	2.37624e-06	3.49156e-06	4.65625e-06	3.96464e-06	2.02371e-06	3.42194e-06	2.03076e-06	3.06672e-06	3.85102e-06	4.49862e-06	3.24257e-06	5.33362e-06	4.8398e-06	3.95148e-06	3.85329e-06	1.96434e-06	4.5187e-06	3.13704e-06	1.94854e-06	2.2546e-06	3.0774e-06
Actinotalea_ferrariae	2.35581e-06	3.8913e-06	5.48971e-06	3.05212e-06	5.04449e-06	5.08923e-06	4.85718e-06	6.60775e-06	3.95812e-06	4.798e-06	4.25755e-06	4.55635e-06	3.26674e-06	4.37625e-06	2.82609e-06	4.20582e-06	2.98011e-06	2.05241e-06	2.18628e-06	3.95101e-06	3.34923e-06	1.80231e-06	4.73695e-06	3.41709e-06
Actinotalea_sp._HO-Ch2	1.63052e-06	2.11302e-06	2.96815e-06	9.31875e-07	2.20155e-06	1.74077e-06	3.53318e-06	3.04348e-06	1.46991e-06	6.84073e-07	9.68442e-07	2.36007e-06	3.52248e-07	1.76584e-06	1.11893e-06	8.03337e-07	2.45261e-06	1.26147e-06	1.23703e-06	1.49804e-06	2.13896e-06	1.45342e-06	2.22867e-06	3.34405e-06
Actinotalea_sp._JY-7876	1.12379e-06	3.86409e-06	1.17063e-06	2.19895e-06	3.2888e-06	2.46693e-06	3.10093e-06	1.73989e-06	2.14273e-06	3.16467e-06	2.51071e-06	1.43113e-06	3.31207e-06	2.27474e-06	6.16974e-07	2.20769e-06	3.77258e-06	4.93663e-06	5.94333e-06	2.81189e-06	2.40425e-06	1.65255e-06	1.27643e-06	2.8553e-06
Actinotignum_sanguinis	0	0	0	0	0	0	0	0	0	0	0	0	0	0	0	0	2.90729e-07	0	0	0	3.95141e-07	1.24697e-07	0	0
Actinotignum_schaalii	0	0	0	0	0	0	1.03965e-07	4.00142e-07	0	0	0	2.76268e-07	0	2.51549e-07	8.87226e-08	0	0	0	0	0	0	0	1.15408e-07	0
Actinotignum_timonense	8.82846e-08	0	1.93668e-07	0	2.65146e-07	7.79592e-08	3.15047e-07	0	5.79934e-08	7.87248e-08	7.61273e-08	0	9.09622e-08	3.62623e-07	0	4.52698e-07	0	0	0	0	0	0	0	2.49365e-07
Acutalibacter_muris	5.92423e-07	1.59276e-07	3.01115e-07	4.1048e-07	3.58371e-07	0	5.40261e-07	0	5.39645e-07	5.06088e-07	4.11479e-07	0	0	0	2.79995e-07	3.76604e-07	8.05209e-07	2.83115e-07	7.45081e-07	5.03275e-07	6.32064e-08	3.72597e-07	7.52662e-07	1.24682e-07
Acutalibacter_sp._1XD8-33	4.73843e-07	1.70659e-07	8.47452e-07	1.89137e-07	3.24067e-07	6.40569e-08	1.57743e-07	3.31e-07	1.22208e-07	0	1.19629e-07	5.53633e-08	7.11976e-07	3.47352e-07	5.8114e-07	2.85633e-07	5.64604e-07	0	0	3.19881e-07	7.00383e-08	0	0	0
Acutalibacter_sp._1XD8-36	2.57064e-07	0	0	0	0	0	0	0	0	0	3.32497e-07	0	0	0	0	0	0	0	0	0	0	0	0	0
Acuticoccus_kandeliae	1.5269e-05	1.21915e-05	1.56691e-05	1.72213e-05	9.27931e-06	1.19401e-05	9.04813e-06	8.75425e-06	1.15935e-05	1.21008e-05	1.9368e-05	1.66873e-05	1.42355e-05	1.09658e-05	1.74383e-05	1.22388e-05	2.05e-05	2.02797e-05	2.00877e-05	1.78095e-05	1.62577e-05	1.42759e-05	1.30056e-05	1.57365e-05
Acuticoccus_sediminis	8.01868e-06	6.72023e-06	9.10243e-06	7.5856e-06	5.29386e-06	4.41323e-06	5.37258e-06	5.90698e-06	1.0626e-05	9.81342e-06	9.90563e-06	5.31085e-06	8.94582e-06	5.79536e-06	7.71533e-06	6.1801e-06	1.22175e-05	1.03996e-05	1.57543e-05	1.08211e-05	6.5741e-06	6.39336e-06	9.13819e-06	6.75871e-06
Acuticoccus_yangtzensis	2.46449e-06	2.64902e-06	2.83862e-06	2.42653e-06	8.30362e-07	2.22913e-06	3.10188e-06	1.05695e-06	1.04801e-06	1.69122e-06	2.85785e-06	2.36226e-06	2.5228e-06	1.50083e-06	4.52543e-06	3.32029e-06	1.64807e-06	1.99526e-06	1.44824e-06	1.48932e-06	1.53079e-06	1.55189e-06	2.1129e-06	3.03514e-06
Adhaeribacter_aerolatus	1.81569e-05	1.35215e-05	1.92867e-05	1.94526e-05	1.94537e-05	1.82671e-05	1.72843e-05	1.4311e-05	2.12174e-05	2.24921e-05	1.8942e-05	1.88773e-05	1.88615e-05	1.82907e-05	2.37846e-05	1.81071e-05	2.14215e-05	1.89012e-05	2.57308e-05	2.15994e-05	2.57868e-05	1.95394e-05	2.03332e-05	2.06778e-05
Adhaeribacter_aquaticus	1.45965e-05	9.67822e-06	1.71987e-05	1.29802e-05	9.94534e-06	1.16866e-05	1.14082e-05	1.04142e-05	1.72136e-05	1.38956e-05	1.53212e-05	1.40722e-05	1.40856e-05	1.30522e-05	1.61081e-05	1.35915e-05	1.74489e-05	1.38042e-05	1.51638e-05	1.40513e-05	1.43838e-05	8.43683e-06	1.24754e-05	1.29224e-05
Adhaeribacter_sp._DK36	1.8173e-05	1.73835e-05	2.18848e-05	1.93971e-05	1.51031e-05	1.52727e-05	1.52506e-05	1.59794e-05	1.90371e-05	1.72494e-05	1.80376e-05	1.90724e-05	2.17459e-05	1.45895e-05	1.96545e-05	1.65101e-05	2.37096e-05	1.55731e-05	1.77196e-05	1.70807e-05	1.86357e-05	1.4675e-05	1.82049e-05	1.75467e-05
Adhaeribacter_sp._HMF7605	2.47766e-05	2.35293e-05	3.66991e-05	2.52551e-05	2.54009e-05	3.16521e-05	2.7477e-05	2.66403e-05	2.90257e-05	3.13212e-05	2.56178e-05	2.44671e-05	2.97059e-05	2.40355e-05	3.12146e-05	2.89637e-05	2.53927e-05	2.19072e-05	2.71998e-05	2.04874e-05	3.52925e-05	2.104e-05	1.93936e-05	2.50762e-05
Adhaeribacter_sp._HMF7616	1.31865e-05	1.07373e-05	1.70709e-05	1.18455e-05	1.42923e-05	1.12726e-05	1.38751e-05	1.15489e-05	1.2469e-05	1.26312e-05	1.3021e-05	1.0382e-05	1.32265e-05	1.04665e-05	1.34017e-05	9.94381e-06	9.45561e-06	1.12291e-05	1.13445e-05	9.57246e-06	1.18805e-05	9.13126e-06	9.18089e-06	1.31122e-05
Adhaeribacter_sp._KUDC8001	2.1787e-05	1.98903e-05	2.97345e-05	2.70976e-05	2.8816e-05	2.80405e-05	2.88411e-05	2.49002e-05	2.46623e-05	2.98779e-05	2.51494e-05	2.71607e-05	2.65948e-05	2.8285e-05	2.72618e-05	2.44402e-05	2.47984e-05	2.27779e-05	2.35652e-05	2.696e-05	3.03333e-05	1.87594e-05	1.85424e-05	2.64706e-05
Adhaeribacter_sp._M2	1.15824e-05	7.83203e-06	1.30529e-05	1.18168e-05	1.16675e-05	1.0484e-05	1.1379e-05	9.88391e-06	1.04158e-05	1.39057e-05	9.9655e-06	1.58132e-05	1.22757e-05	1.05877e-05	1.265e-05	1.38046e-05	1.58627e-05	1.51104e-05	1.13063e-05	1.06245e-05	2.70031e-05	1.37634e-05	1.25997e-05	1.03781e-05
Adhaeribacter_swui	1.77826e-05	1.56379e-05	2.48069e-05	1.82305e-05	1.98029e-05	2.06277e-05	1.95579e-05	1.54363e-05	1.78122e-05	1.80385e-05	2.35398e-05	1.66106e-05	1.77369e-05	1.58796e-05	2.04257e-05	1.94611e-05	1.95489e-05	2.02539e-05	1.61483e-05	1.71798e-05	2.47636e-05	1.52939e-05	1.49021e-05	1.71016e-05
Adlercreutzia_equolifaciens	1.31183e-07	2.73259e-07	6.84058e-08	0	8.50988e-08	0	5.00751e-07	1.37664e-07	0	1.51013e-07	0	0	6.42577e-07	0	1.20391e-07	6.6934e-08	0	0	0	0	0	0	0	0
Adlercreutzia_sp._8CFCBH1	0	0	0	5.841e-07	0	0	0	0	1.97414e-07	0	0	0	0	0	9.2135e-08	0	0	4.33984e-07	3.32192e-07	0	0	0	0	0
Adlercreutzia_sp._Marseille-P7992	0	0	0	0	0	0	0	0	0	0	0	0	0	0	0	0	2.82302e-07	6.5412e-07	0	1.51606e-07	1.27896e-07	0	0	0
Adlercreutzia_sp._ZJ138	6.67189e-08	0	3.41507e-07	1.81918e-07	0	5.89157e-08	1.78567e-07	0	0	0	0	0	0	0	3.21785e-07	0	0	0	0	0	1.31714e-07	0	1.29188e-07	0
Adlercreutzia_sp._ZJ141	0	0	0	0	0	0	0	0	0	0	0	0	3.13616e-07	0	0	0	0	0	0	0	0	0	0	0
Adlercreutzia_sp._ZJ242	0	0	0	0	0	0	0	0	0	1.14614e-07	0	3.97188e-07	0	0	0	2.80608e-07	5.72907e-07	9.95609e-07	3.32192e-07	0	0	1.07111e-07	0	1.41185e-07
Adlercreutzia_sp._ZJ304	0	0	0	0	0	0	0	0	0	0	0	0	0	0	2.66168e-07	0	0	0	0	0	1.08948e-07	0	1.06859e-07	0
Adlercreutzia_sp._ZJ473	2.30005e-07	0	1.96217e-07	4.18092e-07	0	4.06208e-07	0	9.87193e-08	3.34745e-07	0	1.98332e-07	0	1.84318e-07	4.46831e-07	4.72798e-07	0	0	0	0	0	0	0	0	0
Advenella_incenata	1.99785e-06	1.765e-06	6.64453e-07	2.0792e-06	1.31037e-06	7.37153e-07	1.77329e-06	1.46027e-06	1.83406e-06	1.36943e-06	5.77622e-07	1.38474e-06	1.46289e-06	1.54507e-06	1.41089e-06	3.74769e-06	3.3956e-06	2.10889e-06	7.45293e-07	9.20358e-07	5.11692e-07	6.46996e-07	4.53034e-07	1.31097e-06
Advenella_kashmirensis	8.5725e-06	6.81035e-06	7.84242e-06	6.87358e-06	6.65289e-06	6.36745e-06	7.31508e-06	7.89505e-06	6.31599e-06	5.55452e-06	7.15805e-06	5.35906e-06	4.90463e-06	5.39475e-06	6.87322e-06	4.77794e-06	5.78706e-06	5.63706e-06	3.83978e-06	3.04737e-06	5.99393e-06	3.66119e-06	5.47217e-06	6.97457e-06
Advenella_mimigardefordensis	3.40558e-06	2.96672e-06	2.57796e-06	3.19031e-06	4.03178e-06	2.92077e-06	2.94526e-06	2.78177e-06	3.69535e-06	1.63996e-06	1.27335e-06	2.26296e-06	2.54878e-06	1.79267e-06	3.0736e-06	2.35174e-06	2.4793e-06	2.97662e-06	2.4205e-06	2.04249e-06	2.25362e-06	2.11321e-06	3.47451e-06	1.81839e-06
Advenella_sp._EE-W14	3.17101e-07	1.08983e-06	1.31179e-06	1.66737e-06	1.46195e-07	3.50233e-07	3.4837e-07	1.21741e-06	5.24022e-07	2.87513e-07	1.422e-07	5.65438e-07	8.75511e-08	7.718e-08	8.16652e-08	2.95526e-07	8.78618e-07	8.7607e-07	7.68697e-07	1.09104e-06	1.14608e-07	1.2908e-07	3.50903e-07	4.42961e-07
Advenella_sp._S44	2.13192e-06	2.37106e-06	1.55427e-06	1.14135e-06	5.13203e-07	4.38072e-07	8.3428e-07	1.54011e-06	2.17202e-06	1.67186e-06	1.47475e-06	1.17885e-06	2.48774e-06	2.70887e-06	2.22743e-06	1.90873e-06	1.19324e-06	1.0077e-06	2.06091e-06	1.12562e-06	1.63817e-06	1.29276e-06	1.98893e-06	1.67354e-06
Aequorivita_antarctica	2.24901e-06	1.97132e-06	1.78435e-06	2.89347e-06	3.29206e-06	2.16693e-06	2.44123e-06	4.27271e-06	3.06428e-06	3.85128e-06	4.43196e-06	2.33079e-06	2.5564e-06	2.35426e-06	4.69643e-06	2.02197e-06	2.47401e-06	1.2643e-06	2.90689e-06	1.87399e-06	4.12176e-06	1.68512e-06	8.07439e-07	2.47456e-06
Aequorivita_capsosiphonis	2.90239e-07	9.07256e-07	1.23227e-06	6.70919e-07	3.73147e-07	9.34118e-07	4.16528e-07	2.08407e-07	4.67447e-07	7.92308e-07	9.66231e-08	7.14636e-07	1.31278e-06	7.24273e-07	3.42103e-07	9.16253e-07	2.10517e-07	2.33421e-07	7.76602e-07	6.18048e-07	1.07342e-06	1.74124e-07	1.12751e-07	2.3803e-07
Aequorivita_lipolytica	3.60355e-07	8.19137e-07	1.03678e-06	9.43307e-07	8.91833e-07	2.08043e-06	3.72445e-07	7.54402e-07	9.45202e-07	6.29535e-07	5.64082e-07	0	8.90457e-07	9.82633e-07	1.23596e-06	6.2556e-07	1.37247e-06	1.41558e-06	5.3694e-07	1.75531e-06	3.4669e-07	3.80123e-07	1.10577e-06	4.33752e-07
Aequorivita_lutea	6.11122e-07	1.2221e-06	1.53733e-06	1.09041e-06	7.57046e-07	1.19491e-06	5.60028e-07	8.52772e-07	1.96894e-06	7.35652e-07	5.57341e-07	1.3023e-06	9.11082e-07	1.25888e-06	9.79245e-07	7.1963e-07	7.2251e-07	4.4049e-07	5.72742e-07	1.04097e-06	1.03768e-06	8.43908e-08	1.05526e-06	1.12574e-06
Aequorivita_sinensis	1.23101e-07	0	2.10035e-07	0	2.69036e-07	1.28782e-06	1.43471e-06	3.73624e-07	4.86548e-07	4.71051e-07	7.09489e-07	5.00883e-07	8.86712e-07	5.06155e-07	7.22912e-07	6.54752e-07	8.63262e-07	8.57828e-07	1.01861e-06	7.26375e-07	1.03674e-06	7.50145e-07	5.82286e-07	1.74077e-06
Aequorivita_soesokkakensis	0	6.79969e-07	1.01884e-06	8.18593e-07	1.27204e-07	9.7674e-07	1.14441e-06	3.00107e-07	3.04017e-07	4.1167e-07	5.51458e-07	5.3939e-07	1.78804e-07	6.34751e-08	0	0	3.69851e-07	1.44661e-07	6.02376e-07	2.47757e-07	1.9276e-06	4.41186e-07	1.15408e-07	3.69252e-07
Aequorivita_sp.	2.24984e-06	1.75365e-06	2.51021e-06	3.97667e-06	1.41927e-06	1.87659e-06	3.39129e-06	1.27969e-06	4.01354e-06	4.1797e-06	3.43791e-06	3.08581e-06	2.99831e-06	2.97134e-06	4.18775e-06	2.8663e-06	1.80618e-06	2.90268e-06	5.0569e-06	1.82959e-06	5.48487e-06	8.51166e-07	1.6087e-06	2.7048e-06
Aequorivita_sp._609	8.11977e-07	8.79365e-07	3.29666e-07	2.28698e-07	1.83806e-06	1.2056e-06	1.13299e-06	1.14299e-06	7.88674e-07	8.96164e-07	1.86089e-07	4.00915e-07	8.5713e-07	5.81705e-07	1.21348e-06	8.70637e-07	6.77492e-07	4.29084e-07	1.08601e-07	0	1.31333e-06	6.89956e-07	1.20079e-06	3.14939e-07
Aequorivita_sp._CIP111184	1.03868e-06	2.80482e-07	8.57909e-07	4.45935e-07	2.40191e-07	7.99808e-07	3.74794e-07	1.68082e-07	2.71734e-07	1.15034e-06	1.27739e-07	7.84252e-07	1.50402e-07	8.04332e-07	8.12573e-07	8.58331e-08	4.38302e-07	0	9.45896e-07	4.69927e-07	3.48955e-07	7.64375e-07	1.19963e-06	9.13521e-07
Aequorivita_sp._H23M31	3.87124e-06	2.48432e-06	5.68211e-06	2.56444e-06	3.9465e-06	3.96064e-06	3.06301e-06	3.53722e-06	5.49211e-06	4.9553e-06	5.97829e-06	3.7768e-06	1.97384e-06	3.80771e-06	4.86649e-06	4.1379e-06	7.33081e-06	4.37607e-06	3.47502e-06	5.00734e-06	7.73453e-06	6.50104e-06	5.84024e-06	6.14601e-06
Aequorivita_sp._KMM_9714	1.22653e-07	6.35403e-07	5.89725e-07	7.03075e-07	2.75078e-07	9.22823e-07	6.90128e-07	7.52085e-07	1.27258e-07	4.92833e-07	6.98353e-07	6.13388e-07	1.79323e-07	3.34568e-07	6.00608e-07	5.19168e-07	6.40193e-07	2.54447e-07	4.43714e-07	1.1208e-07	7.56748e-07	5.14888e-07	7.49282e-07	5.55766e-07
Aequorivita_sublithincola	5.19273e-07	8.34434e-07	7.97983e-07	7.11381e-07	5.76271e-07	1.66728e-07	4.13111e-07	2.70219e-07	2.33628e-07	3.43842e-07	4.53669e-07	3.51465e-07	3.12152e-07	0	4.97066e-07	7.43819e-07	2.18858e-07	8.2577e-07	2.19589e-06	5.72573e-07	7.49446e-07	3.11355e-07	1.71639e-07	8.7519e-07
Aequorivita_viscosa	6.67189e-08	2.95717e-07	1.65694e-07	7.90845e-08	2.01642e-07	1.42639e-07	1.15517e-07	1.23044e-07	5.00944e-07	5.73008e-07	3.00852e-07	1.18257e-06	1.71536e-07	7.70455e-07	9.33316e-08	1.62129e-07	5.25948e-07	2.32674e-07	0	0	3.06118e-07	2.34165e-07	2.45918e-07	6.94521e-07
Aequorivita_vladivostokensis	2.38834e-07	0	1.20262e-07	6.16991e-07	0	9.52834e-08	0	0	1.59355e-07	4.54005e-07	1.46342e-07	0	0	0	1.47047e-07	1.10058e-07	7.75526e-07	3.71986e-07	8.48531e-07	5.98967e-08	4.8436e-07	7.06387e-07	3.29342e-07	1.09825e-06
Aeribacillus_composti	0	0	0	0	0	0	0	0	0	3.15963e-07	0	0	0	0	0	0	0	0	0	0	0	0	0	0
Aeribacillus_pallidus	5.02393e-07	8.87341e-07	1.80264e-06	1.09603e-06	2.57046e-06	1.07903e-06	2.63378e-06	1.05319e-06	1.43592e-06	1.25455e-06	8.03326e-07	9.78984e-07	2.22506e-06	1.05106e-06	6.0794e-07	2.13006e-06	5.20691e-07	1.20295e-06	1.45554e-06	1.91819e-06	6.59621e-07	1.0799e-06	5.64724e-07	1.41104e-06
Aeriscardovia_aeriphila	1.30869e-06	1.31807e-06	1.14207e-06	1.6021e-06	1.81858e-06	2.49371e-06	1.22535e-06	2.22949e-06	1.73165e-06	1.39437e-06	1.3703e-06	2.6517e-07	6.42991e-07	6.91122e-07	1.36841e-06	1.16055e-06	1.15511e-06	9.52216e-07	8.80094e-07	6.79275e-07	1.17642e-06	1.41773e-06	1.43919e-06	1.176e-06
Aerococcus_sanguinicola	0	0	0	0	0	0	0	0	1.14912e-07	0	0	0	3.13616e-07	1.01371e-07	0	1.08893e-07	0	0	0	0	0	2.49394e-07	0	0
Aerococcus_sp._1KP-2016	0	0	0	3.13569e-07	0	0	0	0	0	0	0	0	0	0	0	0	0	0	0	0	0	0	0	0
Aerococcus_sp._HMSC06H08	0	0	0	4.07372e-07	0	0	0	0	0	0	0	2.68299e-07	0	0	0	0	0	0	0	0	0	0	0	0
Aerococcus_urinae	1.00645e-05	1.52929e-05	1.50004e-05	8.72604e-06	2.44902e-05	1.1988e-05	7.79351e-06	1.40316e-05	1.48575e-05	1.98531e-05	8.26186e-06	1.05869e-05	1.27986e-05	1.94174e-05	9.25416e-06	1.27469e-05	1.16451e-05	3.50347e-05	1.65136e-05	1.63726e-05	1.02203e-05	1.58979e-05	1.37161e-05	1.25191e-05
Aerococcus_urinaeequi	0	0	0	0	0	0	0	0	6.24757e-07	1.48925e-07	1.16937e-07	2.31223e-07	8.92241e-08	0	0	4.64701e-08	0	0	0	0	0	0	0	0
Aerococcus_viridans	1.13509e-07	0	3.68989e-07	4.57187e-07	0	0	1.88892e-07	2.17954e-07	1.05468e-07	1.06764e-07	0	0	1.69674e-07	3.79011e-07	6.46788e-08	7.6798e-08	0	0	0	0	9.28929e-08	4.57791e-07	1.1857e-07	1.31514e-07
Aeromicrobium_camelliae	2.14607e-06	3.13816e-06	2.94135e-06	1.80176e-06	4.96286e-06	4.27554e-06	4.00118e-06	2.04565e-06	6.14897e-06	5.80049e-06	4.43526e-06	6.79047e-06	2.27808e-05	2.6904e-05	1.48318e-05	1.88807e-05	4.77018e-06	7.88612e-06	6.13505e-06	2.47345e-06	3.03098e-06	3.06919e-06	4.93128e-06	3.21051e-06
Aeromicrobium_choanae	8.88057e-07	1.85582e-06	4.60635e-07	1.20198e-06	6.99753e-07	4.48923e-07	1.64237e-06	8.91231e-07	1.59834e-06	3.78991e-06	1.71267e-06	2.42906e-06	1.25587e-05	9.35942e-06	7.45713e-06	7.59378e-06	2.01213e-06	3.13798e-06	3.58944e-06	2.18917e-06	5.70102e-07	8.26523e-07	1.68084e-06	2.11964e-06
Aeromicrobium_endophyticum	9.18138e-07	1.28935e-06	2.69235e-06	3.52943e-06	1.47332e-06	3.52702e-06	1.91138e-06	2.64973e-06	5.98967e-06	6.58418e-06	4.42082e-06	4.90035e-06	2.38382e-05	2.01008e-05	1.29781e-05	1.61518e-05	3.8323e-06	5.54882e-06	4.05066e-06	3.07148e-06	1.96984e-06	2.9406e-06	3.48921e-06	2.59692e-06
Aeromicrobium_erythreum	6.49536e-07	2.14647e-06	2.78306e-06	2.04284e-06	2.92687e-06	3.15305e-06	2.89385e-06	3.18693e-06	7.87173e-06	1.00005e-05	4.7861e-06	8.36827e-06	3.75349e-05	3.69717e-05	2.24559e-05	2.80109e-05	6.92792e-06	1.17933e-05	5.31321e-06	5.05625e-06	4.04249e-06	3.03158e-06	7.05663e-06	3.86284e-06
Aeromicrobium_fastidiosum	1.29817e-06	8.25401e-07	2.03812e-06	9.32534e-07	2.17822e-06	2.9487e-06	2.79994e-06	1.24369e-06	6.03882e-06	6.15134e-06	2.50511e-06	6.33108e-06	2.73645e-05	2.76664e-05	1.38026e-05	2.28175e-05	5.19456e-06	8.69848e-06	6.921e-06	5.0039e-06	1.35784e-06	2.50702e-06	3.604e-06	2.70659e-06
Aeromicrobium_flavum	1.2817e-06	7.09334e-07	1.28402e-06	3.15518e-07	1.30018e-06	3.45818e-07	1.50047e-06	8.82571e-07	2.67164e-06	3.32887e-06	1.56374e-06	3.78375e-06	1.54789e-05	1.80766e-05	1.07026e-05	1.14354e-05	3.28476e-06	5.11134e-06	1.87585e-06	2.3068e-06	2.30795e-06	2.42782e-06	2.68723e-06	3.37828e-06
Aeromicrobium_ginsengisoli	1.20737e-06	2.58481e-06	1.00641e-05	1.29549e-06	3.30701e-06	3.28008e-06	2.33757e-06	3.18542e-06	4.11058e-06	5.76147e-06	4.94987e-06	5.58052e-06	1.97205e-05	2.27747e-05	1.77621e-05	1.90284e-05	2.8618e-06	5.73913e-06	4.08827e-06	5.05713e-06	3.12472e-06	1.50862e-06	4.50323e-06	3.21715e-06
Aeromicrobium_marinum	3.50748e-06	3.31333e-06	2.71781e-06	1.3716e-06	3.35121e-06	3.14885e-06	2.37445e-06	4.35044e-06	2.00023e-05	2.31395e-05	1.51393e-05	2.26334e-05	0.000112636	0.000120775	7.36815e-05	9.07689e-05	1.13813e-05	1.97597e-05	1.12307e-05	1.19856e-05	6.35684e-06	8.17167e-06	7.49403e-06	5.7708e-06
Aeromicrobium_massiliense	7.92659e-07	3.25501e-06	9.93872e-07	1.27004e-06	3.25621e-06	3.87205e-06	3.02445e-06	3.34443e-06	5.29456e-06	5.74212e-06	4.80965e-06	4.80844e-06	2.23869e-05	2.12664e-05	9.48723e-06	1.68594e-05	4.86242e-06	7.60427e-06	1.81164e-06	3.64938e-06	2.08691e-06	1.80638e-06	2.96064e-06	4.52889e-06
Aeromicrobium_sp.	8.36094e-07	2.53352e-07	0	6.40543e-07	4.58804e-07	9.46938e-07	1.22478e-06	1.29744e-06	1.94138e-06	3.36209e-06	1.84277e-06	2.07718e-06	6.44479e-06	7.74255e-06	4.12015e-06	6.01936e-06	1.73702e-06	4.7128e-06	5.5712e-07	2.35985e-06	8.62825e-07	1.14999e-06	9.09494e-07	1.45652e-06
Aeromicrobium_sp._592	2.36221e-07	0	1.0076e-07	0	0	0	0	0	0	0	8.56432e-08	3.4093e-07	1.27724e-06	1.58837e-06	3.7227e-07	4.26494e-07	7.05928e-07	1.4283e-07	1.52629e-07	2.82725e-07	0	0	0	1.09097e-07
Aeromicrobium_sp._9AM	4.0766e-06	3.23734e-06	3.27129e-06	5.6421e-06	4.58238e-06	9.06981e-06	8.06852e-06	7.60175e-06	8.37172e-06	1.22073e-05	7.13844e-06	1.31143e-05	3.64074e-05	4.00793e-05	2.06726e-05	3.1521e-05	6.84749e-06	1.06679e-05	5.53836e-06	4.11392e-06	5.6347e-06	3.46627e-06	4.98296e-06	4.80304e-06
Aeromicrobium_sp._A1-2	2.07649e-06	1.32886e-06	5.75988e-06	2.39989e-06	5.36628e-06	4.66123e-06	4.13848e-06	3.94078e-06	7.48801e-06	5.38912e-06	5.7737e-06	5.42907e-06	2.48219e-05	2.51148e-05	1.92806e-05	2.2032e-05	5.35256e-06	6.38012e-06	2.95548e-06	4.12666e-06	4.00003e-06	3.73358e-06	3.581e-06	3.79575e-06
Aeromicrobium_sp._CC-CFT486	6.64506e-06	6.65212e-06	1.02871e-05	6.78867e-06	1.27041e-05	1.04715e-05	8.72365e-06	1.1119e-05	2.54713e-05	3.47542e-05	2.3509e-05	3.5308e-05	0.000128521	0.00012849	7.73789e-05	0.000105261	2.58062e-05	4.02517e-05	2.39376e-05	2.55991e-05	1.45042e-05	1.38771e-05	1.89096e-05	1.25235e-05
Aeromicrobium_sp._Co35	1.15512e-06	2.26087e-06	1.84629e-06	1.74005e-06	2.20956e-06	2.40918e-06	3.40321e-06	3.13685e-06	5.2695e-06	5.22021e-06	3.53345e-06	3.75084e-06	1.49935e-05	1.51176e-05	8.69027e-06	1.10366e-05	4.67679e-06	4.56538e-06	8.94201e-07	1.24254e-06	1.74341e-06	1.31933e-06	3.41502e-06	1.55061e-06
Aeromicrobium_sp._IC_218	1.20645e-06	2.7992e-06	4.71832e-06	2.78798e-06	3.4947e-06	3.19467e-06	3.47341e-06	4.2117e-06	5.97234e-06	4.84229e-06	2.93643e-06	5.61304e-06	2.076e-05	2.35423e-05	1.32161e-05	1.81301e-05	4.27971e-06	5.90484e-06	2.46993e-06	2.77869e-06	2.62207e-06	2.06888e-06	3.52484e-06	3.50046e-06
Aeromicrobium_sp._Leaf245	3.82023e-07	5.71999e-07	2.54904e-07	9.02699e-08	4.91051e-07	3.89875e-07	1.12598e-07	5.1116e-07	8.13955e-07	2.22072e-06	9.74075e-07	1.60728e-06	7.39389e-06	7.52906e-06	4.94261e-06	5.79883e-06	9.21958e-07	1.21743e-06	3.47823e-07	1.33108e-06	2.90798e-07	3.64727e-07	5.1444e-07	8.83753e-07
Aeromicrobium_sp._Leaf272	3.91351e-07	1.9412e-07	3.71315e-07	0	1.21025e-07	5.75967e-08	6.9653e-08	4.42787e-07	1.19601e-06	1.00143e-06	2.11849e-06	1.12683e-06	5.10184e-06	4.83315e-06	3.53089e-06	3.88104e-06	4.39953e-07	8.53848e-07	1.19864e-06	1.3076e-07	4.66922e-08	1.42417e-07	8.99507e-07	1.31514e-07
Aeromicrobium_sp._Leaf289	5.22085e-07	5.26671e-07	3.66857e-07	1.14473e-06	3.81621e-07	7.14626e-08	8.47389e-07	5.74547e-07	1.16705e-06	7.52216e-07	6.86876e-07	2.61004e-06	4.02976e-06	4.70047e-06	2.27778e-06	5.62832e-06	1.80414e-06	2.2804e-06	2.07945e-06	8.15652e-07	7.87171e-07	5.76685e-07	3.87234e-07	7.43782e-07
Aeromicrobium_sp._Leaf291	4.11967e-07	9.91784e-07	1.39834e-06	1.13418e-06	1.07184e-06	9.0688e-07	7.52969e-07	1.13172e-06	5.70286e-06	4.95575e-06	2.89625e-06	4.61353e-06	1.68568e-05	1.52602e-05	9.95178e-06	1.42097e-05	4.97544e-06	6.09723e-06	3.10446e-06	4.02533e-06	2.96649e-06	2.09335e-06	3.0405e-06	1.77793e-06
Aeromicrobium_sp._M2KJ-4	1.92321e-06	1.69333e-06	1.13119e-06	2.50223e-06	3.97383e-06	3.26118e-06	1.75655e-06	2.64488e-06	4.20401e-06	6.58394e-06	3.1826e-06	5.83547e-06	2.55741e-05	2.22067e-05	1.53822e-05	1.79164e-05	4.8057e-06	6.26218e-06	5.3023e-06	2.36295e-06	1.96484e-06	3.80321e-06	2.37991e-06	2.29928e-06
Aeromicrobium_sp._MF47	9.00494e-07	1.40911e-06	1.63143e-06	1.18287e-06	9.89907e-07	1.22899e-06	5.92166e-07	1.7826e-06	3.91213e-06	3.59931e-06	3.03639e-06	4.86695e-06	1.97426e-05	1.759e-05	1.07269e-05	1.19774e-05	1.55054e-06	4.28143e-06	1.95616e-06	1.46698e-06	2.46009e-06	6.84628e-07	1.9006e-06	7.86501e-07
Aeromicrobium_sp._Marseille-Q0843	9.5374e-07	1.6239e-06	1.06076e-06	8.5312e-07	2.44502e-06	3.40637e-06	3.65291e-06	2.08438e-06	2.38008e-06	2.62433e-06	1.56947e-06	2.35254e-06	8.7257e-06	1.08103e-05	6.26521e-06	6.69791e-06	1.82061e-06	3.21411e-06	2.13094e-06	2.56735e-06	2.01578e-06	1.46476e-06	1.75476e-06	1.92641e-06
Aeromicrobium_sp._PE09-221	2.91906e-06	2.60263e-06	1.88531e-06	2.93759e-06	2.08397e-06	2.05056e-06	9.16475e-07	3.21632e-06	5.6675e-06	4.05615e-06	3.67745e-06	4.93884e-06	1.65443e-05	1.43521e-05	9.04777e-06	1.30432e-05	5.99433e-06	3.76546e-06	2.54524e-06	3.46286e-06	3.0119e-06	1.87299e-06	3.45729e-06	4.4754e-06
Aeromicrobium_sp._Root236	1.10952e-06	4.82322e-06	2.33756e-06	3.58224e-06	4.72596e-06	4.42024e-06	2.77675e-06	3.71283e-06	5.7449e-06	4.8287e-06	8.57024e-06	6.84007e-06	2.76649e-05	2.47641e-05	1.7572e-05	2.06684e-05	5.72736e-06	8.63133e-06	7.81779e-06	5.19342e-06	3.91339e-06	3.11793e-06	2.33979e-06	4.29006e-06
Aeromicrobium_sp._Root344	1.15869e-06	3.05933e-06	8.44074e-07	1.86407e-06	2.9631e-06	2.50033e-06	3.35619e-06	3.10789e-06	6.5605e-06	6.35919e-06	4.67872e-06	5.65982e-06	2.33665e-05	2.28265e-05	1.45715e-05	1.93039e-05	5.69351e-06	5.7661e-06	1.82573e-06	4.7733e-06	2.81027e-06	2.23947e-06	1.85734e-06	3.5719e-06
Aeromicrobium_sp._Root472D3	1.25731e-06	1.18509e-06	2.14643e-06	1.79075e-06	2.50299e-06	1.31038e-06	1.0688e-06	1.81151e-06	3.52945e-06	5.77862e-06	4.06787e-06	4.49349e-06	2.14096e-05	2.41812e-05	1.45516e-05	1.96684e-05	4.68153e-06	5.66237e-06	4.62986e-06	2.54008e-06	3.17812e-06	5.59944e-06	3.58479e-06	4.03686e-06
Aeromicrobium_sp._Root495	1.60489e-06	2.1976e-06	4.28902e-06	1.65999e-06	1.40879e-06	3.54639e-06	2.19779e-06	3.82924e-06	7.91914e-06	8.32559e-06	5.65847e-06	7.23859e-06	3.72585e-05	3.45427e-05	2.05022e-05	3.03713e-05	6.89975e-06	9.63876e-06	6.70584e-06	4.76249e-06	2.45663e-06	4.57722e-06	4.9677e-06	6.67378e-06
Aeromicrobium_sp._S22	7.01362e-07	1.07709e-06	6.60955e-07	4.18656e-07	3.67362e-07	1.51015e-06	6.13677e-07	1.16748e-06	2.10894e-06	1.27541e-06	2.33034e-06	2.24893e-06	1.09495e-05	9.15843e-06	7.10146e-06	9.29453e-06	8.46411e-07	1.72406e-06	2.99215e-06	1.38289e-06	1.16928e-06	1.40167e-06	2.33875e-06	1.00949e-06
Aeromicrobium_sp._S592	1.09788e-06	3.24173e-06	5.76811e-06	1.33102e-06	1.97429e-06	1.64208e-06	2.80439e-06	1.02804e-06	3.71317e-06	6.11058e-06	3.92807e-06	4.24369e-06	2.74274e-05	2.24707e-05	1.34523e-05	1.75435e-05	4.23669e-06	5.28505e-06	2.99034e-06	4.15855e-06	1.5417e-06	1.83311e-06	4.7298e-06	2.4153e-06
Aeromicrobium_sp._SMF47	0	5.05643e-08	3.43451e-07	2.94213e-07	0	4.05548e-07	0	2.88564e-07	6.65569e-07	1.44192e-06	9.92524e-07	1.0286e-06	6.78881e-06	6.99615e-06	2.57099e-06	4.43925e-06	1.57724e-06	3.16085e-06	2.41454e-07	1.4944e-07	3.92902e-07	4.2117e-07	1.14536e-06	7.06912e-07
Aeromicrobium_sp._YC3-14	1.76214e-06	1.64244e-06	1.3136e-06	1.62686e-06	3.17379e-06	2.40441e-06	2.95925e-06	1.70439e-06	4.49281e-06	6.35345e-06	3.7896e-06	7.63026e-06	2.90098e-05	3.0275e-05	1.76772e-05	2.72364e-05	5.36693e-06	5.71159e-06	5.06721e-06	2.69632e-06	2.36386e-06	1.45725e-06	3.7053e-06	3.06361e-06
Aeromicrobium_sp._zg-629	8.53734e-07	6.24258e-07	1.58137e-06	4.60392e-07	1.28306e-06	1.86258e-06	1.56891e-06	1.09846e-06	2.84046e-06	3.21651e-06	2.40598e-06	5.42188e-06	1.30485e-05	1.65015e-05	1.0136e-05	1.11198e-05	3.07935e-06	4.44046e-06	3.44437e-06	2.33326e-06	1.04473e-06	2.01115e-06	1.1096e-06	8.25269e-07
Aeromicrobium_tamlense	7.34369e-07	1.12391e-06	1.32968e-06	1.57324e-06	8.40421e-07	1.34366e-06	1.74851e-06	2.32507e-06	2.4292e-06	5.41754e-06	2.9155e-06	4.88472e-06	2.27519e-05	1.68396e-05	1.04711e-05	1.41625e-05	3.41464e-06	6.79655e-06	3.20704e-06	2.88167e-06	1.5167e-06	1.70452e-06	3.09996e-06	1.97401e-06
Aeromonadales_bacterium	1.68556e-06	1.99136e-06	2.01829e-06	3.37889e-06	1.84286e-06	2.3518e-06	2.98632e-06	2.21803e-06	2.86732e-06	4.81255e-06	2.52311e-06	2.35254e-06	2.34596e-06	1.34287e-06	1.67375e-06	2.05057e-06	1.74083e-06	1.8535e-06	2.8186e-06	1.25277e-06	3.30233e-06	2.44247e-06	3.52569e-06	3.86342e-06
Aeromonas_allosaccharophila	1.06588e-07	9.9907e-07	6.66388e-07	2.95939e-07	0	9.41214e-08	6.87008e-07	9.87193e-08	4.90348e-07	9.9541e-07	3.71573e-07	7.48776e-07	5.07349e-07	7.87976e-07	1.67547e-07	1.71483e-07	3.93566e-07	2.64459e-07	0	0	0	5.18459e-07	4.91269e-07	7.77111e-07
Aeromonas_aquatica	4.27644e-07	2.10347e-07	0	3.05529e-07	0	3.08718e-07	0	4.00142e-07	0	1.03917e-07	3.91512e-07	1.81189e-07	9.33879e-08	2.71673e-07	3.95602e-07	9.3536e-08	5.14441e-07	4.3977e-07	1.19896e-06	1.39478e-07	5.89372e-07	2.916e-07	1.15408e-07	5.03781e-07
Aeromonas_australiensis	0	0	0	0	0	0	0	0	0	0	0	0	0	0	0	0	3.01663e-07	3.99419e-07	9.99517e-08	2.31434e-07	3.90479e-08	0	0	0
Aeromonas_bestiarum	2.86662e-07	6.48945e-07	6.29188e-07	1.84609e-07	5.49917e-07	8.60517e-07	7.32279e-07	9.97199e-08	5.3228e-07	7.44533e-07	1.31614e-06	3.65684e-07	7.47169e-07	2.58881e-07	5.95436e-07	4.35151e-08	2.2584e-07	2.69095e-07	3.65519e-08	0	8.41199e-07	6.06129e-07	5.70742e-07	4.31766e-07
Aeromonas_bivalvium	1.10818e-06	7.94415e-07	2.09887e-07	4.60629e-07	6.63163e-07	1.35189e-06	6.02503e-07	7.21108e-07	2.57118e-08	2.12163e-07	7.38882e-08	0	8.95679e-07	3.95962e-07	2.72446e-07	4.1192e-07	6.97771e-07	1.07786e-06	2.18651e-07	4.35868e-07	6.96935e-07	1.93242e-07	3.09827e-07	5.20332e-07
Aeromonas_cavernicola	6.96984e-07	3.39389e-07	7.64602e-07	5.98957e-07	9.85703e-07	1.65497e-06	1.31727e-06	3.78258e-07	7.15939e-07	6.65584e-07	7.97861e-07	7.90804e-07	5.69731e-07	1.00002e-06	5.22486e-07	4.24922e-07	9.36e-07	1.25313e-07	1.69843e-07	4.06737e-07	1.58534e-06	9.27856e-08	7.22881e-07	7.64204e-07
Aeromonas_caviae	1.15002e-07	8.64275e-07	1.67821e-06	1.21871e-06	1.00755e-06	1.94809e-06	1.88284e-06	1.57881e-06	3.61986e-06	2.79661e-06	1.02417e-06	1.9542e-06	8.50767e-07	3.19813e-07	7.73401e-07	7.55609e-07	1.87913e-06	1.21708e-06	1.20831e-06	1.81234e-07	2.11677e-06	8.43171e-07	1.19613e-06	1.51531e-06
Aeromonas_dhakensis	0	7.75304e-07	1.53321e-07	8.37828e-07	4.44517e-07	7.14515e-07	5.19253e-07	7.57263e-07	1.78905e-06	6.05787e-07	1.634e-06	5.91018e-07	8.51078e-07	3.66442e-07	7.73844e-07	8.0253e-07	4.63472e-07	1.47311e-06	1.33168e-06	8.00389e-07	1.58815e-06	6.89869e-07	4.38259e-07	2.66682e-07
Aeromonas_diversa	1.39403e-06	2.13305e-06	1.40794e-06	1.45651e-06	1.92263e-06	1.48522e-06	1.36578e-06	1.75521e-06	9.09694e-07	9.33002e-07	8.56874e-07	1.13466e-06	1.97998e-06	1.60737e-06	2.36306e-06	1.75503e-06	4.93135e-07	2.91565e-08	1.63689e-07	1.74671e-06	8.22609e-07	2.32075e-07	8.92332e-08	9.37137e-07
Aeromonas_encheleia	2.46407e-06	1.58668e-06	1.65146e-06	1.86027e-06	1.31884e-06	1.12505e-06	1.4832e-06	1.00379e-06	2.13576e-06	1.48499e-06	1.82401e-06	1.1893e-06	1.78717e-06	1.19749e-06	1.01391e-06	1.44251e-06	4.13841e-06	2.24075e-06	1.29493e-06	1.65299e-06	2.01942e-06	2.63427e-06	1.71782e-06	2.97146e-06
Aeromonas_enteropelogenes	1.73073e-07	6.51305e-07	0	1.45757e-07	1.97196e-07	6.34235e-07	1.25132e-06	1.64601e-07	0	9.57579e-07	0	0	0	1.24621e-07	1.42308e-07	1.33868e-07	0	0	2.23654e-07	0	0	0	0	9.50549e-08
Aeromonas_eucrenophila	7.42239e-07	8.91333e-07	8.77559e-07	1.40597e-07	2.52393e-07	3.27554e-07	1.30928e-06	1.10401e-06	1.28319e-07	4.66398e-07	1.2561e-07	8.71972e-08	3.60176e-07	1.51014e-07	2.52717e-07	1.4329e-07	7.68901e-07	4.41548e-07	2.97225e-07	5.4342e-07	6.3948e-07	8.75158e-07	7.40188e-07	5.61436e-07
Aeromonas_finlandiensis	1.90004e-07	0	4.08913e-07	0	0	3.21582e-07	8.47545e-08	1.00782e-06	8.36862e-08	1.69429e-07	0	7.58236e-08	3.04526e-07	9.43311e-08	7.81145e-08	2.89526e-07	0	4.9059e-07	0	4.54819e-07	0	1.81624e-07	9.40828e-08	0
Aeromonas_fluvialis	0	0	5.2221e-07	1.04523e-07	0	0	0	0	2.24246e-07	1.09771e-07	6.81845e-07	0	0	4.42043e-07	2.52285e-07	2.05516e-07	6.3243e-07	2.19098e-07	6.36312e-07	0	4.8488e-07	8.11135e-08	1.6807e-07	0
Aeromonas_hydrophila	2.23927e-06	2.15593e-06	3.12109e-06	2.50898e-06	2.2533e-06	1.60802e-06	1.81263e-06	2.76892e-06	1.59835e-05	9.31278e-06	9.54363e-07	2.34303e-05	2.08752e-06	2.34758e-06	2.93204e-06	2.3569e-06	2.83262e-06	2.73976e-06	1.25929e-06	3.10867e-06	1.74088e-06	2.07518e-06	1.89834e-06	1.21758e-06
Aeromonas_jandaei	6.80436e-05	0.000162218	0.000207257	1.82379e-06	3.02676e-05	5.28076e-06	1.79067e-06	7.82376e-06	9.61583e-05	0.000146612	1.80747e-05	3.92482e-05	1.2283e-05	3.67397e-05	9.64166e-06	1.09091e-05	1.40243e-05	7.68992e-05	2.75868e-05	4.06286e-05	9.92984e-06	5.56215e-05	4.10103e-05	1.45425e-05
Aeromonas_lacus	8.40402e-08	2.27539e-07	0	0	1.30873e-07	0	0	0	3.07965e-07	7.49399e-08	0	2.68299e-07	0	1.30612e-07	6.91013e-08	2.10456e-07	0	0	0	0	3.39416e-07	8.03335e-08	1.66454e-07	3.69252e-07
Aeromonas_lusitana	2.27018e-07	1.0379e-07	7.75618e-07	7.84754e-07	8.83819e-08	9.89482e-08	4.03762e-07	0	5.56262e-07	6.78729e-07	9.39999e-07	7.76337e-07	8.50582e-07	4.29863e-07	3.66238e-07	6.15394e-07	1.15135e-06	7.47256e-08	9.81813e-07	8.39576e-07	2.1676e-06	5.63581e-07	7.87762e-07	4.86668e-07
Aeromonas_media	1.49232e-06	1.7162e-06	2.58503e-06	2.22338e-06	1.80276e-06	2.15935e-06	2.08264e-06	1.03663e-06	1.6475e-06	8.29506e-07	1.27566e-06	1.29169e-06	1.88756e-06	1.71535e-06	1.6856e-06	2.2445e-06	1.47857e-06	2.2393e-06	7.91834e-07	1.06794e-06	4.84132e-07	1.22789e-06	6.83134e-07	1.48197e-06
Aeromonas_molluscorum	0	0	0	0	0	0	0	0	0	0	0	0	0	0	0	0	0	0	3.22701e-07	2.98881e-07	0	0	1.23652e-07	4.11452e-07
Aeromonas_phage_4_4572	0	0	0	0	0	6.70524e-07	1.0537e-07	0	0	0	0	0	0	0	0	0	0	0	0	0	0	0	0	0
Aeromonas_phage_4_D05	0	0	0	0	0	0	0	0	1.02655e-07	3.46389e-08	6.6992e-08	0	2.17905e-07	3.01859e-08	8.62384e-07	1.29752e-06	0	0	0	0	0	0	0	0
Aeromonas_phage_62AhydR11PP	0	0	0	0	0	0	0	0	0	0	0	0	0	0	0	0	0	0	0	0	0	0	1.92347e-07	0
Aeromonas_phage_LAh9	7.80373e-08	3.70141e-07	1.27457e-07	0	2.84257e-07	1.34876e-07	1.77808e-07	6.41254e-08	0	0	0	0	1.19728e-07	0	0	0	0	0	0	0	0	0	0	0
Aeromonas_phage_LAh_8	0	0	0	0	0	0	0	0	0	0	0	0	0	0	0	0	0	0	0	0	4.16265e-07	0	1.63314e-07	9.05712e-08
Aeromonas_phage_vB_AhyS-A18P4	0	0	0	0	0	0	0	0	0	0	0	0	0	0	0	0	3.74593e-07	0	0	0	0	0	0	0
Aeromonas_piscicola	9.71131e-08	8.76448e-08	0	0	6.15355e-07	8.57551e-08	1.79251e-07	3.81088e-07	4.15509e-07	8.65972e-08	4.33138e-07	0	7.78232e-08	7.54648e-08	7.98504e-08	1.6772e-07	1.08216e-07	0	1.29822e-07	3.78744e-07	8.59152e-08	0	2.91837e-07	0
Aeromonas_popoffii	4.60009e-07	0	0	0	2.68635e-07	0	0	0	0	0	0	0	0	0	9.45597e-08	0	0	0	7.11704e-07	0	0	0	0	0
Aeromonas_rivipollensis	7.36391e-07	4.70813e-07	1.34408e-06	4.00453e-07	8.61444e-08	6.53158e-07	3.88324e-07	5.81314e-07	2.39163e-07	3.08511e-07	6.73599e-07	4.00907e-08	4.10889e-07	6.913e-07	4.3325e-07	2.21642e-07	0	3.81722e-07	2.40309e-07	0	6.032e-07	1.44046e-07	4.38259e-07	0
Aeromonas_rivuli	3.93706e-07	1.57074e-07	7.78634e-07	5.09285e-07	1.44796e-07	3.74868e-07	1.65902e-07	1.44839e-07	0	1.0864e-07	2.65782e-07	5.67641e-07	5.44766e-07	4.87517e-07	8.59944e-07	5.31624e-07	5.42268e-07	0	1.59078e-07	6.04876e-07	5.80581e-07	0	0	1.33341e-07
Aeromonas_salmonicida	6.75084e-07	1.07303e-06	8.10451e-07	3.30059e-07	1.23992e-06	6.20407e-07	1.33848e-06	1.12063e-06	1.38431e-06	2.58215e-06	7.03387e-07	7.49361e-07	2.7025e-06	8.90257e-07	1.01886e-06	1.17216e-06	1.48623e-06	8.06944e-07	4.83783e-07	1.61609e-06	1.52541e-06	1.01886e-07	1.43955e-06	1.63717e-06
Aeromonas_sanarellii	7.34975e-07	2.39073e-07	8.01746e-08	5.91034e-07	7.32772e-07	4.60378e-07	5.8031e-07	4.25433e-07	4.44276e-07	3.741e-07	4.05309e-07	4.55563e-07	9.38666e-07	3.60341e-07	8.10495e-07	1.5368e-06	9.37411e-07	9.86157e-07	1.52629e-07	1.4518e-06	2.49591e-07	7.21098e-07	8.74305e-08	3.81334e-07
Aeromonas_schubertii	7.68381e-07	9.77556e-07	3.96928e-07	9.92969e-08	8.95449e-08	3.46942e-07	0	5.47859e-07	8.4842e-07	8.88547e-07	8.76349e-08	1.62227e-07	7.55627e-07	9.30388e-08	7.20489e-07	3.97953e-07	1.57819e-06	1.06014e-06	4.21212e-07	5.49849e-07	1.09965e-06	5.36868e-07	5.2121e-07	4.86344e-07
Aeromonas_simiae	1.53254e-06	1.88161e-07	5.05959e-07	1.83853e-06	2.35333e-07	5.95967e-07	9.87014e-08	0	6.61467e-07	7.10265e-07	1.38133e-06	6.78858e-07	9.55996e-07	7.19333e-07	1.49104e-06	1.23484e-06	3.75074e-07	1.01282e-06	8.50042e-07	1.02637e-06	0	8.19791e-07	9.90397e-07	7.43547e-07
Aeromonas_sobria	4.31877e-07	1.84036e-06	5.15328e-07	1.31667e-06	3.12576e-07	5.56701e-07	5.01291e-07	5.15152e-07	1.6471e-06	8.05529e-07	1.70006e-06	1.09512e-06	6.52969e-07	1.05122e-06	7.94681e-07	7.01261e-07	6.06016e-07	8.83386e-07	4.42233e-07	3.76967e-07	5.7716e-07	1.72341e-06	1.35562e-06	7.81905e-07
Aeromonas_sp._2692-1	1.4898e-07	0	0	0	0	0	0	0	3.05481e-06	0	0	4.04868e-07	0	1.83563e-07	0	1.08893e-07	7.13071e-07	6.92244e-08	1.33594e-07	0	1.0828e-07	9.49396e-08	0	0
Aeromonas_sp._A35_P	7.96862e-07	6.68023e-07	1.25474e-06	1.06049e-06	1.09967e-06	1.28206e-06	1.59832e-06	2.94401e-07	3.88357e-07	4.51501e-07	1.22056e-07	1.12973e-07	6.58623e-07	4.23702e-07	5.22519e-07	1.99885e-07	3.39776e-07	0	3.75049e-07	1.9553e-07	3.68313e-07	3.77791e-07	1.99464e-07	6.57572e-08
Aeromonas_sp._ANP5	0	0	0	0	0	1.10257e-07	0	4.28724e-07	0	0	0	0	0	0	0	0	0	0	0	0	0	0	0	0
Aeromonas_sp._APp10510_Tm27	0	0	0	0	0	0	0	0	0	0	3.3746e-07	4.16464e-07	0	2.02741e-07	0	2.17785e-07	0	0	5.05726e-07	0	0	3.74091e-07	3.87565e-07	0
Aeromonas_sp._ASNIH1	9.39804e-08	0	1.60349e-07	0	0	0	8.38431e-08	0	2.48359e-07	2.51411e-07	1.62077e-07	0	7.53128e-08	7.30305e-08	0	3.3544e-07	0	0	0	0	0	0	0	0
Aeromonas_sp._ASNIH2	0	0	0	0	0	0	0	0	3.47298e-07	5.20995e-07	0	3.81948e-07	0	0	0	5.15845e-08	0	0	0	0	1.1031e-07	2.08867e-07	3.71975e-07	1.20007e-07
Aeromonas_sp._ASNIH6	0	2.8511e-07	0	1.11884e-07	1.77844e-07	0	0	1.05671e-07	1.19282e-06	0	0	2.94751e-07	9.86492e-08	2.86979e-07	2.02438e-07	0	9.33917e-07	0	0	0	0	0	0	0
Aeromonas_sp._CA23	0	0	2.40524e-07	3.20124e-07	0	0	2.51529e-07	0	0	0	0	0	0	0	0	0	0	0	0	0	0	0	9.94898e-08	3.09695e-07
Aeromonas_sp._CU5	2.73131e-07	0	0	2.48242e-07	7.08897e-08	2.41186e-07	1.62446e-07	0	0	0	0	7.26643e-08	0	1.41497e-07	0	0	0	0	0	0	0	0	9.01627e-08	0
Aeromonas_sp._DNRA1	0	0	0	0	2.75895e-07	2.08593e-07	0	3.21543e-07	0	0	2.03692e-07	0	0	0	9.71153e-08	0	1.31614e-07	0	0	0	0	0	1.16968e-07	0
Aeromonas_sp._EERV15	0	0	0	0	0	0	4.52024e-07	0	0	0	2.18452e-07	0	0	0	0	0	0	0	3.27378e-07	0	0	0	0	0
Aeromonas_sp._HMWF014	0	0	0	0	0	2.96845e-07	0	3.12611e-07	0	0	4.2912e-07	0	8.9796e-08	0	0	0	2.68091e-07	0	0	0	0	0	0	0
Aeromonas_sp._HMWF016	2.33071e-07	2.10347e-07	0	0	9.07388e-08	0	4.15862e-07	1.00036e-07	1.02655e-07	0	1.00488e-07	1.86021e-07	0	9.05578e-08	9.58205e-08	9.72775e-08	0	0	0	0	0	0	0	0
Aeromonas_sp._HMWF017	4.96601e-08	0	0	0	0	8.77041e-08	0	0	1.02845e-07	5.20853e-07	1.36472e-07	3.96351e-08	4.23429e-08	8.22738e-08	0	1.21334e-07	0	0	0	7.26909e-08	1.50423e-07	0	9.83593e-08	2.72743e-07
Aeromonas_sp._HZM	0	0	0	0	0	0	0	0	0	1.03917e-07	3.01464e-07	0	0	0	0	0	0	0	0	0	0	0	0	0
Aeromonas_sp._L_1B5_3	0	0	0	3.85506e-07	0	0	0	0	0	0	0	0	0	0	0	0	0	0	0	0	0	0	0	0
Aeromonas_sp._MDS8	0	0	0	0	0	3.15019e-07	3.63932e-07	2.71398e-07	0	0	0	0	0	1.38609e-07	7.3332e-08	0	0	0	0	0	0	0	0	0
Aeromonas_sp._RU39B	9.64379e-07	8.45418e-07	8.52968e-07	1.00554e-07	6.52677e-07	6.00001e-07	5.15076e-07	1.30764e-06	6.3749e-07	4.61984e-07	9.74034e-07	4.676e-07	7.25888e-07	1.34492e-07	4.92228e-07	2.98781e-07	6.55807e-07	6.78928e-07	1.06552e-07	3.97352e-07	8.60984e-07	7.34585e-07	6.74507e-07	0
Aeromonas_sp._WP2-W18-CRE-05	0	0	0	0	0	0	0	5.0989e-07	0	0	0	0	0	0	0	0	0	0	0	0	0	0	0	0
Aeromonas_sp._YN13HZO-058	0	0	0	0	0	0	0	0	0	0	0	0	0	0	0	0	0	0	4.13215e-07	0	0	0	0	0
Aeromonas_taiwanensis	4.30244e-07	6.0214e-08	4.33229e-07	3.2761e-07	4.35523e-07	2.27412e-07	1.78567e-07	5.07757e-07	1.39815e-07	8.33551e-07	5.72456e-07	5.98251e-07	3.46614e-07	0	9.28198e-08	0	0	4.12814e-07	4.40047e-07	0	1.6495e-07	2.91717e-07	9.11118e-08	2.49365e-07
Aeromonas_tecta	1.38672e-07	1.76598e-07	3.40875e-07	4.07372e-07	0	0	5.24196e-07	3.78286e-07	0	0	0	3.36182e-07	0	0	3.56357e-07	0	0	0	0	0	0	0	0	0
Aeromonas_veronii	4.08541e-06	6.3722e-06	3.63603e-06	3.06245e-06	6.36875e-06	3.83472e-06	5.15023e-06	2.20034e-05	4.92093e-06	5.04368e-06	4.28232e-06	5.11848e-06	4.30755e-06	4.0804e-06	4.22958e-06	4.15291e-06	5.23795e-06	6.76092e-06	5.96105e-06	4.2037e-06	5.76722e-06	3.85978e-06	4.65338e-06	5.73837e-06
Aeromonas_virus_25AhydR2PP	0	0	0	0	0	0	0	0	0	0	3.7683e-08	0	0	0	0	0	0	0	0	5.23042e-08	7.05986e-07	0	0	0
Aeromonas_virus_56	0	0	3.15052e-07	0	0	0	0	0	0	0	0	0	0	0	0	0	0	0	0	0	0	0	0	0
Aeromonas_virus_65	6.62135e-08	5.97578e-08	7.67088e-08	0	0	5.84694e-08	0	0	1.16653e-07	0	6.23482e-07	5.28468e-08	2.12245e-07	7.03881e-08	0	2.66021e-07	0	0	0	0	0	6.32931e-08	2.62291e-07	0
Aeromonas_virus_pAh6C	0	0	9.09297e-08	0	0	9.41214e-08	0	0	0	0	3.67639e-07	1.70141e-07	1.70831e-07	8.28273e-08	0	0	0	0	1.37738e-07	0	1.0762e-07	0	0	0
Aeropyrum_pernix	0	0	0	0	0	0	0	0	7.69913e-08	3.1175e-07	3.816e-07	0	8.86594e-08	0	0	4.6176e-07	0	1.4283e-07	2.85938e-07	1.32416e-07	0	0	1.09565e-07	0
Aeropyrum_sp.	0	0	1.0214e-07	0	0	0	0	0	0	0	1.03241e-07	0	0	0	4.92228e-07	0	0	0	0	0	0	0	0	0
Aerosticca_soli	8.54664e-06	1.17822e-05	1.14847e-05	1.45757e-05	1.17569e-05	1.13488e-05	1.02016e-05	1.28803e-05	1.08108e-05	1.15388e-05	8.74422e-06	7.44685e-06	1.59393e-05	1.17131e-05	1.29222e-05	1.54689e-05	6.63201e-06	4.28393e-06	5.1676e-06	2.78406e-06	8.02922e-06	5.20172e-06	6.09899e-06	5.43195e-06
Aestuariibacter_salexigens	8.12174e-07	5.12318e-07	6.65735e-08	4.59647e-07	3.20328e-07	3.68629e-07	1.63694e-07	9.50743e-07	7.36755e-07	8.60302e-07	5.75836e-07	1.82538e-06	0	4.994e-08	8.11653e-07	2.58214e-07	8.6725e-07	1.43765e-06	1.26826e-06	1.11084e-06	1.0425e-06	1.04434e-07	4.48237e-07	5.4069e-07
Aestuariibacter_sp.	0	1.83443e-07	5.78003e-08	0	5.27551e-08	0	4.8356e-07	0	0	0	0	0	0	0	0	0	0	0	0	0	0	0	0	0
Aestuariibacter_sp._GS-14	2.67061e-07	4.46273e-07	1.00649e-06	5.20661e-07	1.44292e-06	8.08787e-07	1.01266e-06	7.57996e-07	2.29686e-07	3.19391e-07	3.90549e-07	5.41173e-07	1.86776e-07	3.39592e-07	3.80793e-07	3.13008e-07	1.29859e-07	3.3187e-07	2.93365e-07	2.61521e-07	1.1031e-07	1.19294e-06	0	3.74047e-07
Aestuariicella_hydrocarbonica	6.31412e-06	5.23172e-06	6.65443e-06	5.16976e-06	7.58006e-06	8.23922e-06	7.1282e-06	5.63512e-06	1.25635e-05	3.77126e-06	6.35746e-06	8.15494e-06	5.76275e-06	4.95367e-06	5.16259e-06	6.40575e-06	6.53805e-06	5.88884e-06	5.73515e-06	3.66939e-06	6.14137e-06	5.24311e-06	5.50606e-06	8.04551e-06
Aestuariimicrobium_kwangyangense	3.2452e-07	7.73056e-07	7.86194e-07	8.9397e-07	5.61474e-07	1.02996e-06	7.84125e-07	1.09176e-06	8.06272e-07	7.77974e-07	1.09007e-06	8.93031e-07	1.5746e-06	1.10828e-06	3.8078e-07	1.15871e-06	1.24521e-06	6.5569e-07	9.69821e-07	1.42138e-06	6.06479e-07	4.68908e-07	7.6751e-07	8.28633e-07
Aestuariisphingobium_litorale	7.41395e-06	6.79028e-06	9.96322e-06	1.00757e-05	7.99687e-06	7.22843e-06	8.35247e-06	8.19237e-06	1.94483e-05	7.82183e-06	8.79936e-06	7.12831e-06	6.11687e-06	9.31346e-06	8.05794e-06	8.00516e-06	8.51803e-06	1.46091e-05	1.55178e-05	1.35035e-05	1.49253e-05	6.81636e-06	8.45048e-06	9.47711e-06
Aestuariispira_insulae	4.94041e-06	6.53489e-06	5.32485e-06	6.1434e-06	3.09155e-06	5.8611e-06	5.7592e-06	4.13122e-06	4.89689e-06	7.11426e-06	6.21058e-06	4.96647e-06	5.62952e-06	6.97212e-06	5.25424e-06	3.7205e-06	4.74889e-06	5.0477e-06	5.17085e-06	5.8663e-06	6.66997e-06	5.59116e-06	4.49137e-06	4.78086e-06
Aestuariivirga_litoralis	1.26705e-05	1.83788e-05	1.47398e-05	1.46414e-05	1.3254e-05	1.3073e-05	1.6151e-05	1.41026e-05	1.50242e-05	1.54324e-05	1.94662e-05	1.16743e-05	1.62604e-05	1.27524e-05	1.15349e-05	1.41613e-05	2.40243e-05	1.96189e-05	1.8825e-05	2.01965e-05	9.78071e-06	1.07166e-05	1.24422e-05	1.89779e-05
Aestuariivita_boseongensis	8.20269e-07	4.65725e-07	3.0228e-07	0	1.04224e-06	1.08049e-06	2.18633e-07	4.1044e-07	3.4996e-07	5.8879e-07	1.01097e-06	3.3272e-07	8.73318e-07	1.58292e-07	8.76407e-08	6.84879e-07	2.54723e-07	7.04934e-07	1.49339e-06	2.51838e-06	9.98712e-07	3.16109e-07	1.15408e-07	3.15101e-07
Aestuariivita_sp.	1.39843e-07	5.9181e-07	1.60505e-07	3.05939e-07	1.76985e-07	4.09338e-07	2.42117e-07	9.32404e-08	4.09168e-07	2.57348e-07	0	2.40664e-07	4.07429e-07	2.16761e-07	4.63862e-07	2.1897e-07	6.40751e-08	0	0	0	0	0	0	0
Aetherobacter_fasciculatus	2.55561e-08	6.47587e-07	0	8.17936e-07	6.60719e-08	9.084e-07	7.5703e-08	2.91366e-07	0	1.31076e-06	8.81474e-08	0	1.22879e-07	6.65866e-08	3.81978e-07	2.54927e-07	6.49294e-07	0	0	6.15343e-07	0	1.04434e-07	8.4859e-08	2.82369e-07
Aetherobacter_rufus	3.70724e-07	1.03084e-06	1.06633e-06	1.63858e-07	4.15562e-07	2.33878e-07	5.57904e-07	8.82667e-08	1.69425e-07	8.20395e-08	2.93634e-07	8.01813e-08	2.72887e-07	2.31301e-07	0	9.99426e-08	7.83088e-07	0	0	0	8.91396e-08	6.9047e-08	3.3663e-07	3.31053e-07
Aetherobacter_sp.	3.19418e-07	1.35205e-06	1.53777e-06	4.012e-07	6.45138e-07	1.25659e-06	8.62659e-07	6.99985e-07	4.40691e-07	2.73886e-07	7.72501e-07	7.14552e-07	4.54401e-07	1.23668e-07	8.82011e-07	9.06422e-07	3.84451e-07	1.61194e-07	0	0	2.29216e-07	0	4.6279e-07	3.78969e-07
Aetherobacter_sp._SBSr008	0	0	3.28952e-07	0	0	0	0	0	9.37714e-07	0	0	0	0	0	0	0	9.1129e-07	0	4.84052e-07	1.45289e-07	1.22567e-07	0	1.20217e-07	0
Afifella_aestuarii	2.73273e-06	4.07751e-06	2.98781e-06	3.28528e-06	2.54467e-06	4.6179e-06	3.46203e-06	2.7829e-06	5.3798e-06	3.1113e-06	4.23888e-06	4.72573e-06	5.22224e-06	4.21737e-06	2.57428e-06	3.32457e-06	1.59123e-05	7.7806e-06	8.47163e-06	4.60046e-06	2.26037e-06	2.2148e-06	1.70854e-06	3.17639e-06
Afifella_marina	2.19334e-06	3.37507e-06	3.66504e-06	2.04254e-06	1.70428e-06	1.3643e-06	4.51296e-06	3.45328e-06	2.90126e-06	1.90369e-06	2.55064e-06	3.18065e-06	5.80404e-06	3.11284e-06	3.22864e-06	3.09812e-06	1.49985e-05	1.32575e-05	5.94181e-06	3.71968e-06	3.13497e-06	1.49586e-06	2.42698e-06	3.52152e-06
Afifella_pfennigii	3.39246e-06	6.58825e-06	6.42176e-06	6.03508e-06	6.29314e-06	5.45665e-06	5.9559e-06	4.86854e-06	1.32812e-05	9.5349e-06	8.70597e-06	6.76242e-06	7.90162e-06	6.91107e-06	6.34363e-06	5.00118e-06	3.26818e-05	2.2511e-05	1.75512e-05	1.85881e-05	7.80988e-06	7.84962e-06	6.69609e-06	7.39891e-06
Afipia_birgiae	6.28431e-06	6.0421e-06	5.54786e-06	5.48375e-06	7.18728e-06	5.22402e-06	7.35203e-06	8.8605e-06	6.21528e-06	7.68384e-06	6.11182e-06	8.75612e-06	7.90563e-06	7.56404e-06	8.71318e-06	6.19877e-06	7.93063e-06	6.63544e-06	8.36714e-06	5.91267e-06	5.43988e-06	6.15725e-06	7.9859e-06	8.29403e-06
Afipia_broomeae	3.57072e-05	3.76088e-05	3.58809e-05	3.2049e-05	3.35326e-05	3.77792e-05	4.70851e-05	4.9454e-05	3.16321e-05	2.38526e-05	3.33816e-05	2.70755e-05	4.75641e-05	3.56092e-05	3.26424e-05	3.64381e-05	3.18285e-05	3.6292e-05	3.35606e-05	2.81967e-05	3.15288e-05	3.01608e-05	3.4816e-05	3.55776e-05
Afipia_clevelandensis	1.36786e-05	1.3294e-05	1.07728e-05	1.43432e-05	1.1714e-05	1.0749e-05	1.38015e-05	1.08236e-05	1.29811e-05	1.28917e-05	1.15071e-05	9.85417e-06	1.55933e-05	1.26975e-05	1.32838e-05	1.28606e-05	1.37028e-05	1.64488e-05	1.42277e-05	1.57033e-05	8.41155e-06	1.02059e-05	1.43889e-05	1.472e-05
Afipia_felis	3.0419e-05	5.04548e-05	3.93163e-05	4.02293e-05	3.49177e-05	4.10343e-05	4.37983e-05	4.14658e-05	0.000108005	3.24029e-05	3.01027e-05	2.96315e-05	4.34921e-05	3.73983e-05	3.45534e-05	3.60561e-05	2.84945e-05	2.65158e-05	3.15259e-05	2.36502e-05	2.66024e-05	2.07316e-05	3.22955e-05	3.00295e-05
Afipia_genosp._2	3.10952e-07	1.27022e-07	6.91816e-07	1.63789e-07	3.50794e-07	6.01236e-07	4.62268e-07	2.01753e-07	4.40726e-07	1.8938e-07	0	2.71192e-07	9.83765e-07	7.00189e-08	6.61259e-07	8.01629e-07	1.00406e-06	3.48976e-07	5.82193e-07	5.47051e-07	4.80026e-07	4.30654e-07	9.06877e-07	4.23247e-07
Afipia_genosp._3	1.15002e-07	0	0	2.09046e-07	0	2.03104e-07	1.02598e-07	0	1.01304e-07	0	0	3.67146e-07	5.52955e-07	0	0	0	0	0	0	0	0	0	0	0
Afipia_massiliensis	3.37128e-05	3.03503e-05	3.24192e-05	3.41064e-05	2.62089e-05	2.64545e-05	2.88055e-05	3.00351e-05	3.50704e-05	3.13534e-05	3.50925e-05	3.50926e-05	3.65794e-05	3.43032e-05	3.19973e-05	3.42396e-05	4.72082e-05	5.38666e-05	4.16956e-05	4.34403e-05	2.76702e-05	2.78402e-05	3.28014e-05	3.4741e-05
Afipia_sp.	1.80811e-05	2.20931e-05	1.61188e-05	2.11921e-05	1.90641e-05	1.8835e-05	2.01977e-05	2.29075e-05	2.06761e-05	1.77707e-05	2.24409e-05	2.02635e-05	2.41202e-05	1.81018e-05	1.70596e-05	1.97676e-05	2.49239e-05	2.37825e-05	2.97711e-05	2.93562e-05	1.38535e-05	1.67823e-05	1.98582e-05	2.33505e-05
Afipia_sp._1NLS2	6.02587e-06	1.06265e-05	7.25215e-06	6.82625e-06	8.60352e-06	9.46337e-06	7.83822e-06	1.09077e-05	2.99262e-05	5.27163e-06	5.22451e-06	6.63973e-06	9.38878e-06	7.25545e-06	7.57165e-06	9.04297e-06	5.96442e-06	5.04219e-06	6.77925e-06	7.59781e-06	5.67118e-06	3.57555e-06	4.73971e-06	3.5707e-06
Afipia_sp._62-7	1.15308e-05	1.66108e-05	1.27717e-05	1.37486e-05	1.30429e-05	1.04265e-05	1.15291e-05	1.42638e-05	1.09544e-05	1.09744e-05	1.40493e-05	1.02917e-05	1.69031e-05	1.37713e-05	1.32413e-05	8.94795e-06	1.2782e-05	1.33582e-05	1.69102e-05	1.03467e-05	8.62816e-06	6.04428e-06	9.88011e-06	1.17893e-05
Afipia_sp._64-13	1.89868e-05	1.80104e-05	1.66656e-05	1.919e-05	1.63802e-05	1.71927e-05	1.67182e-05	1.87188e-05	1.70437e-05	2.23519e-05	1.74e-05	1.86767e-05	1.93509e-05	1.94916e-05	1.96959e-05	2.03792e-05	2.03386e-05	1.65427e-05	2.32171e-05	1.59133e-05	1.52922e-05	1.46304e-05	1.38145e-05	1.31976e-05
Afipia_sp._GAS231	3.85107e-05	4.53602e-05	4.17475e-05	4.82292e-05	4.23205e-05	3.53882e-05	8.14806e-05	5.5037e-05	3.459e-05	3.15649e-05	4.0549e-05	3.62192e-05	5.24143e-05	3.32994e-05	3.33964e-05	3.77981e-05	4.3344e-05	5.13081e-05	4.20611e-05	4.27194e-05	3.13541e-05	2.88485e-05	4.36559e-05	3.9462e-05
Afipia_sp._NBIMC_P1-C1	0	0	0	0	0	0	3.44003e-07	0	1.13222e-07	0	1.10832e-07	0	1.03001e-07	1.9976e-07	0	0	0	0	0	0	0	0	0	0
Afipia_sp._NBIMC_P1-C3	0	0	1.0214e-07	1.08819e-07	0	0	1.06814e-07	0	0	0	3.18448e-07	9.55586e-08	0	0	1.01219e-07	3.74144e-07	4.07766e-07	3.17847e-07	0	0	1.20888e-07	3.43343e-07	2.4048e-07	0
Afipia_sp._OHSU_I-C4	0	0	3.19553e-07	0	0	0	0	0	1.09988e-07	0	0	0	0	0	0	0	0	0	0	0	0	1.19353e-07	0	0
Afipia_sp._OHSU_II-C1	0	3.18679e-07	2.93051e-07	1.11884e-07	7.35277e-07	4.39535e-07	0	6.79595e-07	1.08438e-07	0	0	0	9.86492e-08	0	3.03656e-07	1.02758e-07	0	0	0	0	0	0	0	0
Afipia_sp._OHSU_II-C2	0	0	0	0	0	2.89423e-07	0	0	0	0	0	2.02196e-07	0	0	0	4.22946e-07	0	0	0	0	0	0	1.08195e-07	0
Afipia_sp._OHSU_II-uncloned	0	0	0	0	0	0	0	0	0	0	0	0	0	0	0	0	7.05755e-07	4.9059e-07	1.63689e-07	0	0	0	0	0
Afipia_sp._P52-10	9.22565e-05	8.65085e-05	0.000104592	0.000115634	6.63376e-05	7.34612e-05	6.19576e-05	7.07287e-05	0.000159796	0.000192697	0.000154439	0.00017267	0.000138906	9.6843e-05	0.000124367	0.000124183	0.000157021	0.000166527	0.000130266	0.000118177	9.76295e-05	7.91147e-05	9.49826e-05	0.000110611
Afipia_sp._Root123D2	3.53863e-05	4.16079e-05	2.53933e-05	4.40458e-05	2.77287e-05	3.02202e-05	3.1471e-05	3.17737e-05	3.28914e-05	2.79862e-05	2.7089e-05	3.1409e-05	3.77919e-05	3.18479e-05	3.26819e-05	3.50096e-05	3.64919e-05	3.56742e-05	3.72142e-05	3.37259e-05	2.22534e-05	2.55553e-05	3.19662e-05	2.84895e-05
Afipia_sp._SP17	0	0	1.86406e-07	2.97891e-07	1.70135e-07	9.64745e-08	3.89871e-07	0	0	0	0	8.71972e-08	0	0	0	0	1.21743e-07	0	2.82364e-07	1.3076e-07	1.1031e-07	7.31035e-07	0	1.20007e-07
Afipia_sp._TMED4	7.14113e-07	4.44396e-07	2.10035e-07	1.31007e-06	9.58508e-08	5.88754e-07	2.19645e-07	9.18748e-08	1.14347e-06	1.02861e-06	8.87642e-07	7.28075e-07	1.29498e-06	7.67651e-07	0	4.70688e-07	8.86321e-07	2.01697e-06	5.32055e-07	5.13887e-07	9.0366e-07	4.79887e-07	8.43862e-07	5.37128e-07
Agaribacter_marinus	1.21391e-07	0	0	1.1033e-07	0	3.21582e-07	0	0	0	0	1.04675e-07	0	0	0	0	3.8607e-08	1.86672e-08	1.56716e-07	3.13737e-07	2.90579e-07	2.45134e-07	3.53914e-08	0	0
Agaribacterium_haliotis	5.69299e-07	3.81541e-07	7.86333e-07	9.92969e-08	4.3293e-07	4.6574e-07	2.43885e-07	6.47309e-07	1.96156e-07	1.31225e-06	5.15387e-07	1.08752e-06	5.19935e-07	4.81034e-07	1.05402e-06	2.23808e-07	4.2968e-07	2.29146e-07	7.19398e-08	6.6957e-07	6.13993e-07	2.24513e-07	1.88241e-07	6.21788e-07
Agaricus_bisporus	3.64388e-07	4.44396e-07	3.31208e-07	1.6505e-06	3.82888e-07	2.92347e-07	1.14511e-07	1.16933e-06	1.39347e-06	1.96108e-06	9.66694e-07	2.218e-06	1.92294e-06	6.02675e-06	1.09301e-06	1.64493e-06	2.40884e-06	1.81183e-06	2.96537e-06	5.4122e-06	9.86157e-07	7.12738e-06	7.14324e-06	1.13629e-06
Agarilytica_rhodophyticola	4.33517e-06	7.32755e-06	3.96374e-06	5.30169e-06	3.56647e-06	7.05712e-06	6.40882e-06	4.46925e-06	4.8317e-06	5.62248e-06	5.33957e-06	5.53209e-06	8.01254e-06	3.51957e-06	6.6307e-06	5.70384e-06	2.01846e-06	5.26287e-06	3.42508e-06	3.33695e-06	3.9912e-06	1.83427e-06	4.03644e-06	3.45718e-06
Agarivorans_albus	5.09998e-07	4.67997e-07	1.22233e-07	7.42407e-08	5.26431e-07	5.81447e-07	8.41781e-07	2.58019e-07	6.95307e-07	3.9968e-07	2.26792e-07	3.89576e-07	2.44186e-07	7.51714e-07	3.94278e-07	5.8633e-07	6.49294e-08	1.07624e-06	4.64159e-07	0	4.85977e-07	1.82929e-07	2.6725e-07	7.8693e-08
Agarivorans_gilvus	2.15807e-07	8.19892e-07	1.91186e-07	2.1965e-07	6.44021e-07	3.4558e-07	9.99668e-08	5.89675e-07	6.87292e-07	3.7873e-07	8.37258e-07	1.37125e-06	6.56096e-07	0	5.42573e-07	1.19324e-06	6.49912e-07	8.05969e-07	3.38541e-07	4.76746e-07	6.35785e-07	3.53336e-07	8.83226e-08	2.62222e-07
Agarivorans_sp._Alg241-V36	7.66682e-08	6.91932e-08	0	1.39364e-07	0	1.15193e-07	0	0	0	2.05099e-07	3.22997e-07	1.83573e-07	6.28572e-07	5.95775e-08	1.2608e-07	3.26678e-07	1.70867e-07	1.06956e-06	3.963e-07	9.17617e-08	2.32232e-07	7.32867e-08	7.59265e-08	5.86024e-07
Agarivorans_sp._B2Z047	0	0	0	1.18564e-07	0	0	5.81896e-07	0	6.69489e-07	2.25906e-07	0	0	1.01509e-07	0	0	2.17785e-07	0	0	0	0	0	0	0	0
Agarivorans_sp._Toyoura001	1.56596e-06	4.69526e-07	2.36542e-06	5.00753e-07	4.74247e-07	1.0114e-06	7.00726e-07	4.65814e-07	3.81236e-06	3.52139e-06	1.21293e-06	3.54964e-06	1.23994e-06	5.9524e-06	1.31791e-06	2.27597e-06	3.9015e-06	4.06209e-06	5.34739e-06	8.38044e-06	1.53847e-06	9.42007e-06	8.46628e-06	2.75862e-06
Agathobacter_ruminis	0	0	0	1.1682e-07	0	0	0	0	0	0	0	0	0	0	4.22737e-07	0	0	1.65935e-07	0	0	0	0	0	3.89211e-07
Agathobaculum_desmolans	1.97518e-07	1.33695e-07	0	2.91765e-07	3.69776e-07	1.00233e-07	0	0	0	0	0	9.05945e-08	0	0	0	4.12193e-08	0	1.41045e-07	1.41182e-07	0	1.14608e-07	7.47311e-07	1.12411e-07	0
Agathobaculum_sp._M2	0	3.32128e-07	7.84867e-08	0	0	0	0	0	0	0	0	0	0	0	0	0	0	0	0	0	0	0	0	0
Agathobaculum_sp._Marseille-P7918	1.6808e-07	0	0	0	2.11186e-07	6.11005e-08	2.38371e-07	6.57926e-08	0	9.99199e-08	0	4.47165e-08	0	0	0	1.40304e-07	0	8.05969e-07	3.80715e-07	0	5.65694e-08	0	0	0
Aggregatibacter_actinomycetemcomitans	0	9.86004e-08	3.44134e-07	0	0	0	0	1.07181e-07	3.29963e-07	0	3.7683e-07	0	0	0	5.73151e-07	0	0	0	0	0	0	0	0	0
Aggregatibacter_aphrophilus	8.40402e-08	1.17732e-07	9.54501e-07	3.55691e-07	2.61747e-07	3.57016e-07	0	7.2141e-08	0	0	6.78973e-08	0	3.155e-07	1.83563e-07	2.58974e-07	0	6.58069e-07	0	0	0	0	0	0	3.69252e-07
Aggregatibacter_kilianii	2.30644e-07	0	6.73132e-07	4.10427e-07	3.49722e-07	0	2.16595e-07	2.08407e-07	0	0	9.96506e-07	1.74394e-07	5.48654e-07	1.69796e-07	0	1.82395e-07	0	0	2.82364e-07	7.26447e-07	2.45134e-07	7.84412e-07	0	4.93361e-07
Aggregatibacter_segnis	0	0	0	0	0	0	0	0	2.73693e-07	3.67655e-08	5.38406e-07	1.60178e-07	1.38309e-07	2.86575e-08	4.16031e-08	0	0	0	0	0	0	0	0	0
Aggregicoccus_edonensis	4.25728e-07	4.86294e-07	6.45271e-07	1.55719e-07	1.50853e-07	2.34165e-07	7.92144e-07	8.30012e-07	0	7.95281e-08	5.28422e-07	4.43515e-07	3.50675e-07	8.51087e-08	3.04262e-07	5.14369e-07	5.42308e-07	1.17435e-06	7.2697e-07	5.84404e-08	4.32096e-07	2.33371e-07	2.75866e-07	1.05501e-07
Aggregicoccus_sp._17bor-14	0.000201758	0.000230578	0.000201827	0.000203259	0.000221373	0.000199214	0.000205098	0.000186866	0.000163825	0.000169212	0.000167349	0.000160686	0.000189869	0.000158065	0.000207225	0.000202135	0.000127968	0.000132226	0.000117317	0.000120157	0.000160227	0.000119924	0.000143223	0.000144253
Agitococcus_lubricus	1.39901e-06	3.07373e-06	1.67942e-06	1.25269e-06	1.08078e-06	2.1447e-06	3.90505e-06	2.58668e-06	1.30473e-06	1.56099e-06	2.00516e-06	1.66397e-06	8.68195e-07	1.4485e-06	1.26441e-06	1.33654e-06	1.3452e-06	2.35928e-06	1.43679e-06	1.73038e-06	2.83594e-06	9.50081e-07	1.52775e-06	1.00363e-06
Agreia_bicolorata	1.15582e-06	8.90212e-07	8.94364e-06	1.68881e-06	5.24007e-07	1.5335e-06	1.65198e-06	1.86199e-06	3.31351e-07	8.51008e-07	1.13765e-06	1.06003e-06	1.17237e-06	1.15823e-06	9.44125e-07	1.58685e-06	9.57412e-07	6.58886e-07	8.92608e-07	6.69088e-07	8.63321e-07	6.01756e-07	5.22009e-07	5.42697e-07
Agreia_pratensis	7.34469e-08	6.6286e-08	2.5063e-07	0	0	0	0	0	0	1.11339e-06	7.47408e-07	3.07755e-07	0	1.14149e-07	0	0	1.43227e-07	8.42058e-07	3.34672e-07	0	0	7.02075e-08	3.32908e-07	0
Agreia_sp._Leaf210	0	0	0	0	0	0	0	2.02775e-07	1.38723e-07	7.0214e-08	6.78973e-08	1.2569e-07	1.893e-07	2.44751e-07	6.47435e-08	1.97184e-07	8.77425e-08	0	0	9.42417e-08	0	1.50535e-07	0	2.59474e-07
Agreia_sp._Leaf244	2.62965e-07	1.42718e-07	9.49859e-08	4.4036e-07	3.16377e-07	4.36232e-07	4.80893e-07	1.54416e-07	0	7.40305e-07	1.45694e-07	1.04116e-07	2.5076e-07	1.26846e-06	0	1.88195e-07	1.45364e-07	1.12628e-06	0	0	0	1.24697e-07	0	2.43052e-07
Agreia_sp._Leaf283	5.21636e-07	4.3435e-07	1.08061e-07	1.7269e-07	3.53414e-07	1.61892e-06	1.27788e-06	1.28917e-06	4.50465e-07	4.35571e-07	0	3.62897e-07	1.77319e-07	0	4.34391e-07	8.10646e-08	9.6468e-07	1.04478e-07	1.04579e-07	4.45554e-07	2.94161e-07	9.28299e-08	1.29188e-07	2.95217e-07
Agreia_sp._Leaf335	0	0	0	0	0	0	0	0	0	0	0	0	0	0	0	0	0	0	0	4.61507e-07	2.59554e-07	1.22863e-07	0	0
Agreia_sp._VKM_Ac-1783	0	8.96367e-08	0	7.5215e-07	4.34397e-07	2.55486e-07	2.58116e-07	8.52576e-08	0	0	0	0	0	6.36467e-07	4.15923e-07	3.67056e-07	2.43485e-07	2.82089e-07	0	0	3.30931e-07	0	1.08195e-07	0
Agrobacterium_albertimagni	2.38732e-06	2.99454e-06	2.41038e-06	2.92529e-06	1.61095e-06	2.07755e-06	1.76281e-06	5.8651e-06	1.65754e-06	2.45913e-06	2.71285e-06	3.56034e-06	2.44724e-06	3.06718e-06	2.43064e-06	4.76477e-06	1.84902e-06	4.55436e-06	2.59861e-06	1.50128e-06	2.89542e-06	2.12347e-06	3.12116e-06	3.23838e-06
Agrobacterium_arsenijevicii	1.0163e-07	0	1.58643e-07	4.86443e-07	3.05861e-07	8.21059e-08	4.76928e-07	0	1.90102e-07	1.7514e-07	4.38174e-07	2.96841e-07	5.36166e-07	5.83324e-07	0	2.74337e-07	3.39747e-07	5.59658e-07	0	1.35855e-07	8.56896e-07	4.09163e-07	2.24821e-07	2.23269e-07
Agrobacterium_bohemicum	1.25377e-06	2.67034e-07	9.15259e-07	8.12494e-07	1.13314e-06	1.03113e-06	1.19574e-06	8.07701e-07	5.31018e-07	2.63324e-07	1.08244e-06	2.23036e-07	9.75927e-07	4.941e-07	6.08458e-07	4.56226e-07	1.39551e-06	1.37605e-07	1.26184e-06	2.38857e-07	3.28238e-07	8.35514e-07	7.38968e-07	3.47033e-07
Agrobacterium_deltaense	1.37279e-06	2.23683e-06	1.99333e-06	1.67228e-06	2.57131e-06	2.38938e-06	1.89846e-06	1.40803e-06	3.26025e-06	1.7362e-06	2.90555e-06	2.77341e-06	1.22378e-06	2.54531e-06	3.48772e-07	2.03804e-06	2.36834e-06	4.51855e-06	8.86627e-07	1.61989e-06	7.13479e-07	1.23603e-06	1.96697e-06	7.44606e-07
Agrobacterium_fabrum	2.99487e-06	2.17339e-06	4.36357e-06	3.39274e-06	3.5855e-06	2.48311e-06	3.06458e-06	3.29082e-06	2.59458e-06	3.04466e-06	3.32483e-06	1.08417e-06	1.79409e-06	1.14346e-06	1.62906e-06	9.50541e-07	3.2806e-06	2.44324e-06	3.28228e-06	3.23788e-06	2.53011e-06	2.82343e-06	9.47293e-07	2.25951e-06
Agrobacterium_genomosp._1	6.84845e-07	9.20751e-07	3.7637e-07	8.12519e-07	7.55523e-07	1.9094e-06	1.88037e-07	2.16391e-06	2.692e-07	1.06764e-07	7.62364e-07	3.24143e-07	1.68906e-07	4.6791e-07	7.48597e-08	2.01982e-07	4.69168e-07	0	7.05822e-07	2.55781e-07	2.77491e-07	9.87505e-07	1.44543e-07	8.86673e-07
Agrobacterium_genomosp._13	2.57064e-07	0	5.13554e-07	3.95962e-07	0	1.92949e-07	3.44003e-07	3.84752e-07	3.24876e-07	1.94844e-07	2.79133e-07	2.08232e-07	0	3.52823e-07	3.29658e-07	2.70215e-07	5.02774e-07	2.39466e-07	1.3222e-06	2.22005e-07	2.42885e-07	5.47886e-07	5.03906e-07	2.64235e-07
Agrobacterium_genomosp._2	6.43176e-07	1.0645e-06	1.57789e-06	1.36788e-06	2.21271e-06	1.47429e-06	2.40724e-06	1.58773e-06	5.28307e-07	1.15582e-06	8.60015e-07	1.42372e-06	1.70056e-06	1.08783e-06	9.48832e-07	1.32756e-06	1.75485e-07	1.44497e-06	2.74433e-06	1.29415e-06	5.86024e-07	3.94587e-07	1.28407e-06	6.28423e-07
Agrobacterium_genomosp._3	4.56147e-07	9.83964e-07	6.21353e-07	5.91153e-07	9.24646e-07	3.78346e-07	8.43915e-08	6.6952e-07	1.1562e-06	2.6229e-07	1.93246e-07	0	6.5777e-07	8.95935e-07	3.56557e-07	7.23596e-07	0	6.09923e-07	0	7.06813e-07	2.75776e-07	4.40687e-07	6.96494e-07	2.41609e-07
Agrobacterium_genomosp._5	3.51611e-07	1.56199e-07	7.94e-07	5.61713e-07	5.09322e-07	1.86967e-07	1.77214e-07	1.12795e-06	1.002e-06	5.82984e-07	9.99432e-07	4.91472e-07	5.5995e-07	6.42133e-07	1.42693e-06	5.41295e-07	1.90927e-06	9.76193e-07	5.48665e-07	5.55479e-07	2.9379e-07	3.93916e-07	0	2.81657e-07
Agrobacterium_larrymoorei	1.60106e-06	1.11324e-06	2.3618e-06	1.7583e-06	1.47785e-06	2.36028e-06	3.60048e-06	3.42088e-06	1.65354e-06	1.46378e-06	1.81248e-06	2.12574e-06	1.80741e-06	1.69794e-06	3.35648e-06	2.76461e-06	1.74835e-06	3.0098e-06	1.72108e-06	1.87392e-06	5.64599e-07	1.30141e-06	2.28966e-06	1.55738e-06
Agrobacterium_rhizogenes	3.13604e-05	5.68074e-05	3.43695e-05	3.94773e-05	5.00476e-05	4.45855e-05	4.21744e-05	6.56514e-05	4.56134e-05	2.74882e-05	2.83929e-05	6.10345e-05	3.02381e-05	4.66263e-05	2.58578e-05	4.87332e-05	2.42587e-05	2.43006e-05	4.72e-05	3.03028e-05	2.13823e-05	2.03155e-05	3.16593e-05	2.75078e-05
Agrobacterium_rosae	1.18529e-06	2.7971e-07	1.68855e-06	4.60578e-07	2.85316e-06	2.66546e-06	8.23918e-07	2.18005e-06	1.08155e-06	1.74694e-06	6.17211e-07	1.67348e-07	1.0942e-06	6.58797e-07	7.41806e-07	1.70433e-06	7.02419e-07	1.38366e-06	1.55449e-06	2.16162e-06	6.22801e-07	8.28063e-07	5.25894e-07	9.87536e-07
Agrobacterium_rubi	3.00952e-06	2.69083e-06	2.23396e-06	1.83991e-06	2.23264e-06	1.17297e-06	1.24201e-06	2.34653e-06	6.62695e-07	1.66127e-06	2.24405e-06	2.01883e-06	1.10903e-06	7.28865e-07	1.01152e-06	8.46685e-07	1.63183e-06	3.47614e-06	1.84327e-06	2.49187e-06	1.29067e-06	7.41466e-07	9.92726e-07	2.55452e-06
Agrobacterium_salinitolerans	3.49299e-07	7.76226e-07	2.52843e-07	7.10322e-07	1.07081e-06	9.64683e-07	4.72712e-07	1.14559e-06	6.49577e-07	7.3353e-07	4.15572e-07	1.26105e-06	8.7075e-07	1.97052e-06	2.87162e-07	8.74302e-07	9.68396e-07	2.72772e-06	3.27378e-07	6.45303e-07	1.24111e-06	1.04009e-06	0	1.16355e-06
Agrobacterium_sp.	7.31884e-07	2.35677e-06	9.24524e-07	9.26627e-07	1.62479e-06	9.73101e-07	1.06086e-06	2.14343e-06	1.21678e-06	1.53076e-06	5.49993e-07	1.85506e-06	9.3192e-07	5.95673e-07	5.33361e-07	9.28356e-07	9.67086e-07	2.60628e-06	5.65992e-07	1.11316e-06	1.83181e-06	8.65467e-07	1.05064e-06	1.13407e-06
Agrobacterium_sp._10MFCol1.1	5.21802e-07	0	5.56435e-07	0	2.03147e-07	2.30387e-07	4.58671e-07	3.3594e-07	0	0	0	0	0	0	0	0	0	0	0	0	0	0	0	0
Agrobacterium_sp._13-2099-1-2	0	0	0	5.192e-08	0	0	0	0	0	4.83111e-07	2.46294e-07	9.11866e-08	1.83113e-07	0	9.39416e-08	1.43055e-07	0	0	0	0	1.73036e-07	0	5.65727e-08	1.88246e-07
Agrobacterium_sp._13-626	7.25643e-07	9.35278e-07	3.36791e-07	9.97759e-07	1.77532e-07	6.1186e-07	3.07226e-07	9.09538e-07	1.23243e-06	4.56988e-07	1.01846e-07	4.91829e-07	8.87444e-07	7.67128e-07	1.76335e-06	3.54654e-07	1.11188e-06	1.33124e-06	1.8749e-06	9.28043e-07	1.00282e-07	1.08502e-07	3.50903e-07	3.75945e-07
Agrobacterium_sp._33MFTa1.1	4.01847e-07	9.17337e-07	0	1.82615e-07	0	0	2.68876e-07	8.62376e-08	0	0	8.86659e-08	0	0	3.88105e-08	0	0	0	0	0	0	3.52993e-07	0	0	0
Agrobacterium_sp._719_389	0	0	0	0	2.75895e-07	1.04297e-07	0	0	2.10935e-07	1.06764e-07	1.03241e-07	0	0	9.30388e-08	9.71153e-08	2.99828e-07	4.15719e-07	6.5412e-07	0	0	0	0	0	0
Agrobacterium_sp._ATCC_31749	0	3.42958e-07	3.0228e-07	0	0	0	0	3.31e-07	0	0	3.11808e-07	2.79031e-07	0	0	0	0	0	1.50448e-07	0	0	0	0	0	0
Agrobacterium_sp._B1(2019)	0	0	0	0	0	0	0	0	2.0531e-07	1.03917e-07	1.55053e-07	4.10091e-07	2.80164e-07	0	1.87425e-07	0	3.65228e-07	0	0	0	0	0	0	4.11452e-07
Agrobacterium_sp._B131/95	5.39517e-08	6.43065e-07	5.45336e-07	6.11269e-07	1.07395e-06	5.23479e-07	1.21152e-06	8.04646e-07	1.00529e-06	0	2.82622e-07	8.45171e-07	3.64162e-07	5.91579e-08	3.91448e-07	1.04064e-06	7.04054e-07	4.87982e-07	9.23964e-07	1.26593e-06	0	2.81297e-07	0	1.23887e-06
Agrobacterium_sp._B133/95	2.81941e-07	7.18741e-07	1.50245e-07	1.08819e-07	8.78117e-08	1.99173e-07	6.28479e-07	5.94053e-07	5.84988e-07	4.77965e-07	0	7.21772e-07	1.59043e-07	9.30388e-08	5.06706e-07	1.7147e-07	0	0	5.765e-07	0	0	6.09695e-07	0	1.31514e-07
Agrobacterium_sp._C13	0	4.09237e-07	2.79609e-07	0	1.78693e-07	7.0807e-08	4.10554e-07	1.63754e-07	4.5289e-07	2.25906e-07	0	1.27996e-07	0	0	1.79663e-07	0	0	0	0	9.47093e-07	0	1.01611e-06	2.03662e-07	0
Agrobacterium_sp._CGMCC_11546	1.0875e-06	1.01528e-06	1.84438e-06	8.69668e-08	6.42298e-07	3.95881e-07	2.97418e-07	4.33933e-07	2.29036e-07	2.95202e-07	8.2548e-07	1.27724e-06	1.13586e-06	5.39881e-07	2.6958e-07	3.55067e-07	7.71192e-07	7.05223e-07	8.56834e-07	7.22535e-07	6.94546e-07	4.54061e-07	3.58589e-07	6.73723e-07
Agrobacterium_sp._CNPSo_2736	5.20465e-07	6.00027e-07	1.36812e-08	1.45757e-08	0	4.12292e-07	9.13097e-07	1.05447e-06	1.83965e-06	5.72018e-08	2.76572e-08	2.04793e-07	2.23932e-07	2.17146e-07	3.7233e-07	1.33868e-08	2.76903e-07	3.17576e-07	2.17581e-07	7.9578e-07	1.61923e-07	6.13188e-08	3.7634e-07	1.93773e-07
Agrobacterium_sp._CNPSo_675	0	5.5161e-08	0	0	0	5.39717e-08	1.09055e-07	3.67263e-07	0	5.45018e-08	0	0	0	0	0	0	0	0	0	0	0	0	0	0
Agrobacterium_sp._D14	0	0	7.76691e-08	8.27474e-08	0	0	0	0	0	0	7.89485e-07	1.45329e-07	0	0	0	0	1.01452e-07	0	0	0	0	0	0	0
Agrobacterium_sp._DE0009	0	0	0	0	0	0	2.46234e-07	0	0	0	1.79821e-07	4.16464e-07	2.80164e-07	3.62231e-07	2.99439e-07	0	0	4.51343e-07	7.15321e-07	0	0	6.68375e-07	0	0
Agrobacterium_sp._DSM_25558	7.11432e-07	5.25815e-07	2.9181e-07	1.62606e-06	7.88062e-07	3.23857e-07	1.77169e-07	2.22852e-07	8.21231e-07	2.19076e-06	8.45636e-07	6.73076e-07	1.86852e-07	4.56724e-07	4.0955e-07	6.0468e-07	2.47593e-07	7.29997e-07	4.35866e-07	1.16231e-07	9.68652e-07	5.83686e-07	7.65309e-07	1.2877e-06
Agrobacterium_sp._FDAARGOS_525	6.48175e-07	9.2097e-07	0	2.10873e-07	5.36953e-07	0	1.33701e-06	3.80093e-07	0	0	0	2.76979e-07	2.59502e-07	6.80827e-08	3.93783e-07	4.59451e-07	0	0	6.61978e-07	3.48694e-07	2.41776e-07	4.98787e-07	1.1857e-07	5.24088e-07
Agrobacterium_sp._H13-3	0	0	0	0	4.66124e-07	0	0	0	0	0	0	0	0	0	0	0	0	0	0	0	0	1.14448e-07	0	0
Agrobacterium_sp._ICMP_6402	6.9739e-07	1.02464e-06	6.30543e-07	1.06029e-06	1.56238e-07	1.77188e-07	1.88892e-07	6.14254e-07	1.86511e-07	7.21644e-08	6.25674e-07	1.54543e-07	2.27739e-07	1.25775e-07	2.3486e-07	4.13098e-07	0	1.18774e-07	1.31332e-07	1.21638e-07	0	5.27665e-07	8.77116e-07	2.23269e-07
Agrobacterium_sp._ICMP_7243	0	2.95801e-07	9.32029e-08	0	1.70135e-07	0	0	0	0	0	0	0	0	0	0	0	0	0	0	0	0	0	0	0
Agrobacterium_sp._JL28	0	0	0	1.13482e-07	0	0	0	0	1.09988e-07	0	0	4.58408e-07	2.00117e-07	2.75345e-07	0	0	0	1.52481e-07	0	0	0	0	0	2.74301e-07
Agrobacterium_sp._LAD9	4.77039e-07	9.10953e-07	8.88383e-07	1.62117e-07	6.30719e-07	5.82939e-07	4.18787e-07	1.98349e-06	5.81089e-07	7.95281e-08	1.2561e-07	4.32648e-07	2.07697e-07	3.04112e-07	1.86663e-07	4.86897e-07	3.33013e-07	8.59482e-07	0	8.94088e-08	7.15324e-07	1.93754e-07	0	9.79648e-08
Agrobacterium_sp._LC34	0	0	0	0	0	0	0	0	0	0	0	0	0	0	0	0	0	0	0	0	0	3.68589e-07	0	0
Agrobacterium_sp._LY4	0	0	0	0	0	0	0	0	0	5.60739e-07	9.43986e-07	0	0	0	0	0	0	0	0	0	2.59554e-07	0	0	0
Agrobacterium_sp._MA01	1.15002e-07	2.02257e-07	3.10676e-07	5.07348e-07	7.64653e-08	8.9772e-07	0	7.81528e-08	4.661e-07	0	1.99864e-07	7.83795e-08	1.70857e-07	2.397e-07	6.62353e-07	1.91995e-07	8.54312e-07	1.64536e-06	0	8.60494e-07	0	0	4.8764e-07	0
Agrobacterium_sp._MS2	0	0	0	0	0	0	0	4.64767e-07	0	8.14273e-07	0	2.7536e-07	1.84318e-07	8.93663e-08	0	0	0	0	0	0	0	0	0	0
Agrobacterium_sp._NCPPB_925	1.25287e-06	1.24438e-06	8.95819e-07	4.99889e-07	6.81631e-07	7.91167e-07	5.9722e-07	9.40983e-07	1.69796e-06	1.00063e-06	6.11511e-07	1.05349e-06	3.94635e-07	8.74541e-07	4.75353e-07	3.40889e-07	4.96909e-07	8.27785e-07	4.67218e-07	6.44903e-07	4.9546e-07	3.41008e-07	2.27779e-07	9.36165e-07
Agrobacterium_sp._RAC06	1.28532e-07	1.11099e-07	1.9438e-07	0	2.87553e-07	4.94633e-07	9.62643e-08	4.22686e-07	0	4.02037e-07	3.42573e-07	9.82504e-08	1.81503e-07	1.91319e-07	2.61329e-07	1.07291e-07	9.53231e-07	7.02514e-07	2.73255e-07	1.68723e-07	6.68547e-07	6.14315e-07	9.89379e-07	1.33341e-07
Agrobacterium_sp._RC10-4-1	0	0	1.77408e-07	0	0	0	7.5703e-08	7.84554e-07	2.99966e-07	0	0	0	0	0	0	0	0	1.56447e-06	0	0	0	0	0	0
Agrobacterium_sp._RS6	0	0	0	0	0	1.00233e-07	1.8653e-07	6.18142e-07	0	0	0	0	0	0	0	0	0	0	0	0	0	0	0	0
Agrobacterium_sp._RZME10	0	0	0	0	0	0	0	0	0	0	0	0	0	0	0	0	0	0	4.77234e-07	0	0	0	0	0
Agrobacterium_sp._SCN_61-19	6.93364e-07	9.25925e-07	5.37895e-07	1.41709e-07	1.19604e-07	1.97801e-07	1.24134e-07	8.72403e-08	5.17532e-07	6.32041e-07	4.68112e-08	6.7093e-07	1.64357e-07	7.89748e-08	2.26925e-07	9.9937e-07	2.54403e-07	4.33984e-07	0	2.43275e-07	4.26104e-07	6.54002e-07	9.00385e-07	5.96307e-08
Agrobacterium_sp._SUL3	5.32938e-08	5.33163e-07	3.35968e-07	3.45234e-07	2.96699e-07	9.41214e-08	3.03795e-07	5.97415e-07	3.75567e-07	0	0	0	6.36736e-08	2.64485e-07	0	1.97866e-07	1.7708e-07	2.11377e-06	1.37738e-07	0	0	3.13301e-07	1.08195e-07	6.56052e-07
Agrobacterium_sp._T29	3.81145e-07	1.57808e-06	2.59194e-07	9.48976e-07	2.1994e-06	2.59534e-06	1.35139e-06	1.5331e-06	2.77812e-07	1.68308e-07	1.478e-06	4.9827e-08	5.45519e-07	8.17522e-07	4.37355e-07	4.03999e-07	5.08397e-07	9.0882e-07	1.11247e-06	1.4944e-07	1.78279e-07	4.36584e-07	2.11082e-07	6.46577e-07
Agrobacterium_sp._TS43	0	0	0	0	0	9.89482e-08	0	1.92376e-07	0	0	0	0	0	4.35374e-07	1.50518e-07	1.01331e-07	1.24864e-07	0	0	1.45289e-07	3.67701e-07	0	0	3.42153e-07
Agrobacterium_sp._TS45	0	0	0	0	0	0	0	0	0	0	0	0	0	0	0	0	0	6.26865e-07	0	0	0	0	0	0
Agrobacterium_sp._YIC_4121	1.85961e-07	0	0	0	0	0	7.35438e-07	4.29807e-07	3.16403e-07	4.87109e-08	1.04675e-07	2.98962e-07	0	0	0	0	0	1.87183e-06	0	0	1.1031e-07	8.95145e-07	5.40976e-08	4.44281e-07
Agrobacterium_sp._a22-2	2.3168e-06	2.35519e-06	3.59339e-06	2.0839e-06	2.09093e-06	2.89826e-06	2.2992e-06	2.22771e-06	2.56377e-06	2.78389e-06	2.40203e-06	2.57299e-06	2.45952e-06	2.74473e-06	3.70719e-07	1.35757e-06	2.41102e-06	6.84418e-06	1.41287e-06	1.37879e-06	2.95933e-06	3.66876e-06	1.93416e-06	1.85208e-06
Agrobacterium_tumefaciens	2.01736e-05	2.26032e-05	1.32718e-05	2.05575e-05	2.72058e-05	2.29781e-05	2.39296e-05	5.95953e-05	1.82597e-05	1.55379e-05	2.18011e-05	2.47037e-05	1.52036e-05	2.01544e-05	1.58593e-05	1.56223e-05	1.96772e-05	3.86724e-05	2.59045e-05	2.02563e-05	1.86435e-05	1.49481e-05	1.13937e-05	2.23882e-05
Agrobacterium_virus_7-7-1	0	0	3.48422e-07	0	0	1.44261e-07	0	0	0	0	0	0	0	0	0	0	0	0	0	0	0	0	0	0
Agrobacterium_virus_Atuph07	4.52048e-07	5.98047e-07	3.29557e-07	8.77763e-08	7.48355e-07	3.44513e-07	5.48097e-07	3.41558e-07	3.40293e-07	8.61188e-08	2.49832e-07	2.03261e-07	3.04388e-07	1.12572e-07	4.76455e-07	8.06167e-08	0	6.23402e-08	1.24802e-07	1.15589e-07	4.87559e-08	9.2317e-08	1.91284e-07	4.85052e-07
Agrobacterium_vitis	1.24411e-05	1.31505e-05	1.42381e-05	1.83664e-05	1.14065e-05	1.02796e-05	1.15067e-05	1.51764e-05	1.44399e-05	1.1461e-05	2.13942e-05	1.04769e-05	1.14815e-05	1.09927e-05	1.06175e-05	1.36441e-05	1.19277e-05	1.61334e-05	2.14195e-05	1.44638e-05	9.21322e-06	6.39164e-06	8.55299e-06	1.26811e-05
Agrococcus_baldri	7.85809e-07	4.80321e-07	9.33577e-07	6.30298e-07	9.27292e-07	9.71826e-07	6.58068e-07	1.4106e-06	6.41283e-07	4.51745e-07	1.46682e-06	6.91461e-07	1.14769e-06	9.65352e-07	2.02438e-07	8.07524e-07	4.37651e-07	1.2224e-06	1.86527e-06	6.50613e-07	1.78957e-06	5.28967e-07	4.64531e-07	1.39305e-06
Agrococcus_carbonis	6.75955e-07	2.68016e-07	3.93879e-07	3.22973e-07	8.21849e-07	3.75224e-07	7.00265e-07	4.50091e-07	1.43582e-06	1.44851e-06	2.21312e-06	5.11272e-07	1.22571e-06	4.15681e-07	1.15142e-06	3.96005e-07	1.42459e-06	1.99989e-06	0	6.4179e-07	1.89234e-06	1.78637e-06	9.37319e-07	9.64436e-07
Agrococcus_casei	2.42783e-07	0	0	3.45381e-07	8.29928e-08	0	1.90181e-07	0	1.11582e-07	9.50457e-08	3.79215e-07	4.73815e-07	3.53526e-07	5.8272e-07	1.79663e-07	4.86387e-07	0	1.05631e-06	8.57814e-07	0	1.35737e-06	8.97622e-07	2.13752e-07	3.6154e-07
Agrococcus_jejuensis	5.63978e-07	6.30056e-07	5.3717e-07	1.83301e-07	1.01261e-06	4.78104e-07	9.87014e-08	6.34028e-07	9.53838e-07	1.67626e-07	9.38045e-07	5.70383e-07	4.78994e-07	1.63196e-06	5.90053e-07	1.27081e-06	2.95663e-07	0	3.41085e-07	0	3.70512e-07	0	7.58837e-07	9.51668e-07
Agrococcus_jenensis	1.04147e-06	5.5754e-07	5.79965e-07	4.35467e-07	8.45455e-07	5.35971e-07	6.00689e-07	5.02349e-07	1.39642e-06	1.13129e-06	1.24102e-06	1.25521e-06	6.65046e-07	1.18744e-06	1.67047e-06	1.33325e-06	1.32339e-06	2.5927e-06	1.15802e-06	1.4264e-06	1.26561e-06	6.84e-07	1.00105e-06	1.01648e-06
Agrococcus_lahaulensis	2.91621e-07	8.46377e-07	4.67774e-07	1.66299e-06	8.41754e-07	4.73533e-07	2.84066e-07	2.98977e-07	6.18992e-07	3.48491e-07	2.94652e-07	3.9478e-07	6.71355e-07	7.92221e-07	8.60726e-07	6.99921e-07	5.05769e-07	5.63251e-07	5.71943e-07	1.29492e-07	9.1061e-07	3.81493e-08	1.41414e-06	6.08168e-07
Agrococcus_pavilionensis	3.17843e-07	1.76857e-07	4.09435e-07	0	5.20715e-07	7.888e-07	4.47761e-07	3.15154e-07	2.40598e-07	5.31226e-07	2.94837e-07	7.11653e-07	4.4162e-07	7.46062e-07	8.21671e-07	1.65814e-07	0	9.24883e-08	0	1.94712e-07	6.81723e-07	1.00789e-06	1.02165e-07	1.08079e-06
Agrococcus_sp._Marseille-P2731	2.33071e-07	3.24166e-07	9.94165e-08	2.95054e-07	3.58952e-07	1.07394e-06	8.05128e-07	9.82987e-07	4.29741e-07	5.31629e-07	3.89099e-07	2.81579e-07	0	3.53392e-07	9.58205e-08	4.39223e-07	0	1.31204e-07	2.62664e-07	0	2.05228e-07	9.71475e-08	5.77041e-07	0
Agrococcus_sp._NS18	4.43915e-07	1.05174e-07	2.16927e-06	3.34098e-07	4.757e-07	4.34815e-07	2.03767e-07	6.16886e-07	1.98589e-07	1.08532e-06	9.19097e-08	5.88318e-07	9.7279e-08	7.70365e-07	5.44483e-07	5.65259e-07	0	3.61145e-07	0	9.00446e-07	8.25435e-07	8.02316e-07	5.50604e-07	2.70438e-07
Agrococcus_sp._SGAir0287	0	3.53195e-07	0	1.07348e-07	9.1965e-08	6.2578e-07	1.0537e-07	1.1198e-07	1.94915e-07	2.95965e-07	2.03692e-07	0	2.8395e-07	0	0	0	0	1.26305e-06	3.37151e-07	1.4944e-07	3.52993e-07	1.11396e-07	0	0
Agrocybe_aegerita	5.40165e-07	1.89991e-06	4.31356e-07	1.40237e-06	3.0277e-07	0	3.39018e-07	2.06919e-06	9.72866e-07	1.25521e-06	6.23132e-07	1.92345e-06	5.51092e-07	1.82988e-06	9.52205e-07	2.40333e-07	9.1353e-07	5.93911e-07	1.37258e-06	2.83535e-06	9.4721e-07	3.68952e-06	3.24551e-06	8.67149e-07
Agrocybe_pediades	5.71163e-07	1.02625e-06	7.04439e-07	1.95604e-06	7.09049e-07	9.37363e-07	8.15314e-07	1.03433e-06	5.47764e-07	1.56721e-06	2.39062e-06	6.79043e-07	6.77554e-07	2.32203e-06	9.8707e-07	1.4753e-06	1.81136e-06	1.50417e-06	1.54198e-06	1.58574e-06	2.43548e-07	4.63977e-06	1.06652e-06	1.21847e-06
Agromyces_albus	2.49372e-06	1.70733e-06	3.91132e-06	1.91113e-06	2.78314e-06	2.21756e-06	1.36068e-06	2.89904e-06	3.23603e-06	3.79736e-06	2.35473e-06	1.83285e-06	3.49416e-06	3.71266e-06	2.86605e-06	2.59539e-06	4.48161e-06	2.72298e-06	3.87856e-06	2.14398e-06	1.20192e-05	4.88954e-06	5.52506e-06	7.84612e-06
Agromyces_allii	3.49159e-07	1.35676e-07	8.8344e-07	8.13219e-07	7.85494e-07	1.42381e-07	5.58657e-07	5.11892e-07	1.31555e-06	9.94459e-07	4.88372e-07	8.78702e-07	1.49055e-06	1.5586e-06	1.01164e-06	1.15485e-06	1.20813e-06	1.74257e-06	8.24419e-08	1.19474e-06	1.21416e-06	6.65099e-07	2.43117e-06	9.71375e-07
Agromyces_atrinae	2.27056e-07	1.17465e-06	5.36483e-07	6.98846e-07	5.68873e-07	3.31789e-07	6.09887e-07	1.34847e-06	1.13769e-06	1.02594e-06	1.17703e-06	5.6151e-07	9.45908e-07	9.64266e-07	4.14893e-07	1.49506e-06	1.57813e-06	1.62321e-06	3.39626e-07	1.3542e-06	6.17121e-08	6.31986e-07	6.40027e-07	4.25516e-07
Agromyces_aureus	3.44102e-08	9.96591e-07	4.85732e-07	4.59737e-07	4.94357e-07	4.4201e-07	7.0179e-07	1.83585e-07	0	6.16545e-07	1.51036e-07	6.10003e-07	5.17776e-07	0	3.07994e-07	1.4739e-07	0	0	0	4.07565e-07	0	4.77411e-07	3.40772e-08	1.06472e-06
Agromyces_binzhouensis	8.28726e-07	3.68092e-07	6.14975e-07	1.02731e-06	9.14533e-07	2.32031e-06	1.2125e-06	1.69587e-06	1.42627e-06	1.06913e-06	6.53911e-07	1.65803e-06	1.3858e-06	5.56679e-07	6.83111e-07	4.00652e-07	7.85221e-07	1.05885e-06	4.73374e-07	5.53698e-07	7.85425e-07	1.31551e-06	5.51534e-07	1.9992e-06
Agromyces_bracchium	1.44089e-06	1.32338e-06	2.37487e-06	2.26825e-06	3.68077e-06	2.56016e-06	2.13455e-06	2.05561e-06	1.34359e-06	1.34836e-06	1.65647e-06	2.89636e-06	2.4279e-06	2.01793e-06	2.5906e-06	1.69647e-06	1.41191e-06	3.27201e-06	3.3762e-06	3.24596e-06	1.38539e-06	1.03176e-06	5.17752e-07	1.8368e-06
Agromyces_cerinus	1.47722e-06	9.15877e-07	1.46829e-06	8.42898e-07	7.88577e-07	8.18795e-07	6.63696e-07	5.09753e-07	6.74237e-07	1.14116e-06	8.86659e-08	6.89526e-07	5.0679e-07	0	8.80319e-07	6.30346e-07	1.90234e-06	2.89464e-07	1.31332e-07	1.11285e-07	0	3.11475e-07	1.37162e-06	1.21526e-07
Agromyces_flavus	1.70605e-06	2.92185e-06	4.51976e-06	4.12406e-06	2.29157e-06	2.60398e-06	2.45435e-06	2.0848e-06	5.05398e-06	6.78528e-06	6.19214e-06	5.57612e-06	4.67958e-06	4.19729e-06	6.30906e-06	3.59964e-06	8.23467e-06	5.70115e-06	6.90208e-06	9.25969e-06	7.02277e-06	6.01926e-06	5.43318e-06	8.67068e-06
Agromyces_fucosus	6.44251e-07	6.94148e-07	1.47741e-06	1.73463e-07	6.01313e-07	3.16839e-07	1.39648e-06	1.2512e-06	1.80208e-06	1.11188e-06	1.72025e-06	1.57219e-06	7.92252e-07	7.10737e-07	8.46228e-07	6.82581e-07	1.61041e-06	2.3907e-06	1.20494e-06	2.37223e-06	8.32959e-07	1.58007e-06	2.15365e-06	2.13959e-06
Agromyces_hippuratus	1.63368e-07	3.49733e-07	9.17186e-07	4.18745e-07	7.35092e-07	3.20573e-07	4.2845e-07	7.19073e-07	6.80391e-07	6.46572e-07	0	9.96018e-07	6.84133e-07	2.67088e-07	8.86806e-07	3.78105e-07	8.75821e-07	2.20953e-06	2.85938e-07	5.64262e-07	3.40386e-07	9.98927e-07	5.57463e-07	2.40014e-07
Agromyces_italicus	7.94562e-08	4.24014e-07	2.08939e-06	1.08819e-07	7.85928e-07	9.06118e-07	5.1333e-07	1.06803e-06	6.76503e-07	5.63384e-07	5.75414e-07	5.71116e-07	7.15422e-07	1.32008e-06	4.75472e-07	1.04131e-06	1.3172e-06	9.17565e-07	1.33806e-06	7.78687e-07	1.68724e-06	1.42295e-06	9.7444e-07	4.98976e-07
Agromyces_lapidis	1.80874e-07	7.23279e-07	2.29638e-06	4.00061e-07	7.14203e-07	9.0851e-07	6.54272e-07	1.50042e-06	1.2881e-06	1.91976e-06	5.55591e-07	2.0749e-06	5.51561e-07	9.30205e-07	1.83141e-06	1.2461e-06	1.54351e-06	7.34908e-07	1.87063e-06	8.97707e-07	6.94749e-07	8.80726e-07	1.39748e-06	1.69236e-06
Agromyces_luteolus	6.18111e-07	8.74402e-07	7.42132e-07	1.29034e-06	9.8214e-07	2.93325e-06	1.62458e-06	1.4586e-06	1.95436e-06	9.23705e-07	2.02141e-06	1.74641e-06	1.58252e-06	8.53246e-07	1.30924e-06	1.2238e-06	2.52287e-06	8.32317e-07	6.77018e-07	1.62336e-06	1.13743e-06	7.64942e-08	1.02847e-06	6.31615e-08
Agromyces_protaetiae	0	8.51519e-07	1.89975e-07	7.07612e-07	1.74498e-07	8.37748e-07	7.68701e-07	6.83327e-07	1.36099e-06	3.54261e-07	1.70788e-06	1.50017e-07	4.75547e-07	2.40333e-07	3.71679e-07	6.12266e-07	2.51539e-06	7.26774e-07	6.94437e-07	7.26964e-07	1.6228e-06	8.03335e-08	6.95299e-07	2.36548e-06
Agromyces_ramosus	2.96584e-06	2.59632e-06	5.57637e-06	2.82622e-06	1.86447e-06	1.93894e-06	2.74364e-06	3.70839e-06	2.31878e-06	3.65735e-06	3.67753e-06	2.40829e-06	3.56491e-06	2.00563e-06	2.36581e-06	2.57377e-06	2.8346e-06	3.00647e-06	7.08094e-07	5.29278e-06	2.4745e-06	1.62564e-06	2.45295e-06	3.0506e-06
Agromyces_salentinus	4.11712e-07	4.26272e-07	3.78729e-07	4.17248e-07	5.86426e-07	5.87988e-07	2.82036e-07	2.69502e-07	1.34525e-06	4.65932e-07	5.71516e-07	5.05209e-07	6.38916e-07	5.16427e-07	9.2135e-08	2.174e-07	4.03956e-07	1.14471e-06	7.24009e-07	1.8979e-06	1.29648e-06	1.16037e-07	1.33807e-06	0
Agromyces_sp.	2.73626e-06	1.2504e-06	5.91682e-06	2.3683e-06	3.06195e-06	4.38891e-06	2.5002e-06	2.34408e-06	4.58098e-06	5.28336e-06	3.42002e-06	3.12717e-06	3.16396e-06	3.42073e-06	3.611e-06	3.2411e-06	1.1847e-05	7.81792e-06	9.99136e-06	1.23379e-05	9.96172e-06	6.85635e-06	6.73816e-06	8.74521e-06
Agromyces_sp._ANK073	1.56445e-06	4.45377e-06	2.07511e-06	2.9303e-06	1.50413e-06	1.59892e-06	1.18726e-06	4.24256e-06	3.02049e-06	2.20399e-06	1.4742e-06	2.53184e-06	3.86379e-06	2.98887e-06	2.64903e-06	1.84057e-06	2.89326e-06	3.02954e-06	2.16833e-06	1.95021e-06	2.9002e-06	2.16631e-06	3.11846e-06	2.54185e-06
Agromyces_sp._CF514	1.455e-06	1.01606e-06	1.55776e-06	8.73867e-07	1.92365e-06	2.32399e-06	1.82782e-06	1.99961e-06	8.88881e-07	1.01801e-06	8.85381e-07	8.86694e-07	1.28641e-06	1.00966e-06	1.33601e-06	1.02346e-06	3.83145e-07	1.67291e-06	1.15286e-06	2.09299e-06	2.91455e-07	7.04612e-07	2.16695e-07	1.22107e-06
Agromyces_sp._CFH_90414	1.14135e-06	8.10952e-07	1.32894e-06	1.33884e-06	1.00936e-06	6.63558e-07	8.87168e-07	3.23186e-07	1.6398e-06	7.52608e-07	1.45383e-06	5.86339e-07	2.19522e-07	1.12933e-06	1.83412e-06	1.83182e-06	2.03717e-06	1.56587e-06	5.72543e-07	1.95962e-06	1.14643e-06	1.50063e-06	1.72136e-06	2.05313e-06
Agromyces_sp._H66	3.53507e-06	2.55524e-06	4.54486e-06	3.89361e-06	2.9831e-06	2.40338e-06	2.66271e-06	2.25213e-06	2.91722e-06	4.45038e-06	2.84468e-06	2.19628e-06	2.46535e-06	2.89273e-06	2.83986e-06	2.52973e-06	4.62331e-06	4.92052e-06	3.7116e-06	3.20106e-06	1.84508e-06	2.34279e-06	4.32533e-06	2.85584e-06
Agromyces_sp._HY045	1.14431e-06	9.98064e-07	2.39144e-07	2.21559e-06	4.83899e-07	1.16425e-06	9.4471e-07	3.87218e-07	7.77692e-07	2.5681e-06	1.4588e-06	1.8986e-06	1.56515e-06	1.77099e-06	1.82295e-06	1.47607e-06	7.97907e-07	9.41122e-07	1.18609e-06	5.22618e-07	1.35264e-06	1.57907e-06	9.74772e-07	1.30196e-06
Agromyces_sp._HY050	0	0	2.09053e-07	3.38032e-07	1.44796e-07	9.47503e-08	4.14756e-07	4.50041e-07	1.43909e-07	3.081e-07	1.00488e-07	2.25557e-07	1.58847e-07	2.02613e-07	3.41143e-07	1.5523e-07	3.79458e-07	5.51512e-07	0	2.93294e-07	4.9485e-07	1.08502e-07	2.42681e-07	2.20702e-07
Agromyces_sp._HY052	0	0	0	4.23667e-07	0	1.02906e-07	0	0	0	0	0	0	3.09004e-07	0	0	0	0	0	3.0944e-07	0	3.62664e-07	3.43343e-07	0	0
Agromyces_sp._KACC_19306	5.5922e-07	3.18364e-07	1.13485e-06	2.97983e-07	4.24419e-07	6.07174e-07	7.14736e-07	1.70154e-07	2.04686e-06	2.14911e-06	1.16275e-06	1.15298e-06	4.62669e-07	1.08441e-06	4.81095e-07	5.47355e-07	7.6727e-07	1.01873e-06	1.97686e-06	6.71438e-07	1.0319e-06	6.60038e-07	1.29188e-07	2.033e-06
Agromyces_sp._LHK192	7.62998e-07	1.10394e-06	6.65978e-07	1.09481e-06	9.828e-07	7.80128e-07	1.4808e-06	1.65115e-06	2.60387e-07	1.84104e-07	7.97729e-07	1.02585e-07	6.12925e-07	7.97625e-07	8.56184e-07	2.41033e-07	8.36134e-07	1.79785e-06	2.72158e-07	3.57492e-07	4.24786e-07	4.02636e-07	1.06302e-06	7.29392e-07
Agromyces_sp._Leaf222	2.39457e-07	3.52035e-07	4.92417e-07	7.20759e-07	4.93146e-07	0	0	2.02775e-07	4.71753e-07	5.65631e-07	5.95701e-08	4.27431e-07	1.65172e-07	5.65211e-08	5.8276e-07	1.99885e-07	1.31614e-07	9.02686e-08	1.68575e-07	0	3.30931e-07	0	0	6.08724e-07
Agromyces_sp._MF30-A	5.37857e-07	0	8.19366e-08	5.0619e-07	0	5.0776e-08	0	4.78084e-07	0	9.2326e-07	3.18448e-07	0	0	1.35837e-07	8.68702e-07	0	3.38637e-07	5.85013e-07	6.32664e-07	2.04055e-07	7.4503e-07	5.49651e-08	9.51167e-08	1.01741e-06
Agromyces_sp._MF845	3.7008e-07	3.48985e-07	1.32253e-06	1.10378e-06	2.65236e-07	1.07194e-07	3.12353e-07	5.6152e-07	7.08811e-07	6.31755e-07	9.69212e-07	6.04124e-07	1.10025e-06	7.55082e-07	7.1281e-07	4.47697e-07	0	3.00895e-07	4.65498e-07	8.40588e-07	2.0881e-06	6.49322e-07	1.36202e-06	4.78096e-07
Agromyces_sp._MMS17-SY077	3.08477e-07	1.43663e-06	9.05942e-07	6.44326e-07	6.10397e-07	1.43109e-06	6.0634e-07	7.35189e-07	6.63916e-07	6.8123e-07	9.38256e-07	1.52947e-06	5.40767e-07	7.62417e-07	3.54918e-07	6.27434e-07	2.32174e-07	4.22212e-07	0	4.66971e-07	2.78657e-07	0	8.32649e-07	2.31473e-07
Agromyces_sp._Marseille-P2726	2.05543e-06	1.17287e-06	6.49169e-07	1.80447e-06	1.16027e-06	2.09076e-06	1.38827e-06	1.87172e-06	1.89881e-06	1.49425e-06	1.21531e-06	1.62956e-06	1.68904e-06	8.77711e-07	1.98596e-06	2.50163e-06	2.49941e-06	1.14662e-06	2.2084e-06	1.87734e-06	2.34532e-06	1.75588e-06	1.86495e-06	2.28942e-06
Agromyces_sp._NDB4Y10	1.87476e-06	1.26995e-06	1.95941e-06	1.34841e-06	1.60369e-06	1.73728e-06	1.43439e-06	1.79679e-06	1.41309e-06	1.66731e-06	2.35236e-06	1.5126e-06	9.62945e-07	1.07638e-06	2.89025e-06	1.44078e-06	2.54147e-06	3.39952e-06	3.63721e-06	3.00335e-06	1.82078e-06	1.82574e-06	2.46848e-06	4.2967e-06
Agromyces_sp._NEAU-184	4.52175e-06	4.88879e-06	9.36633e-06	4.19228e-06	3.02323e-06	3.23733e-06	4.28968e-06	5.25618e-06	6.22886e-06	6.88099e-06	7.03598e-06	7.5142e-06	6.08947e-06	4.26023e-06	4.36683e-06	4.37753e-06	1.56954e-05	1.65451e-05	1.16842e-05	1.90943e-05	1.56127e-05	2.14186e-05	1.56267e-05	1.37755e-05
Agromyces_sp._OV415	1.36556e-06	1.29373e-06	1.13805e-06	7.03339e-07	1.07651e-06	7.36589e-07	4.17376e-07	7.38168e-07	1.25732e-06	1.45797e-06	1.97552e-06	1.8347e-06	1.63562e-06	1.21152e-06	2.19315e-06	2.01981e-06	1.90432e-06	7.68275e-07	1.20692e-06	2.02488e-06	1.07941e-06	1.96042e-06	2.44081e-06	2.12211e-06
Agromyces_sp._OV429	1.13509e-07	9.46803e-07	5.88752e-07	3.97379e-07	1.76764e-07	4.70607e-07	3.06496e-07	6.87499e-07	8.56457e-07	1.01218e-07	1.01846e-07	4.03045e-07	1.8435e-07	0	8.55507e-07	5.78754e-07	1.07635e-06	9.35337e-07	6.08481e-07	9.86871e-08	1.96107e-07	6.95826e-07	1.92347e-07	0
Agromyces_sp._OV568	1.77823e-06	1.69899e-06	2.15745e-06	2.21244e-06	1.03102e-06	1.41123e-06	1.48422e-06	2.28934e-06	2.21532e-06	2.14449e-06	2.45105e-06	1.82659e-06	2.0247e-06	2.21948e-06	2.49933e-06	2.70256e-06	2.11253e-06	1.88394e-06	3.29324e-06	2.17558e-06	2.33438e-06	4.10084e-07	1.89104e-06	2.91526e-06
Agromyces_sp._Q22	1.23562e-06	1.28726e-06	9.50934e-07	1.49595e-06	3.54401e-07	1.53736e-06	1.65432e-06	3.4718e-07	2.55024e-06	3.09804e-06	3.3756e-06	2.16644e-06	2.10709e-06	2.83904e-06	2.12956e-06	1.41734e-06	1.88082e-06	2.26933e-06	1.29245e-06	2.60916e-06	3.07242e-06	1.34464e-06	2.36074e-06	2.04193e-06
Agromyces_sp._Root1464	9.50019e-08	0	2.37965e-07	4.46613e-07	0	2.23954e-07	1.16298e-06	8.05967e-07	2.28135e-07	3.091e-07	7.85752e-07	2.27471e-07	3.98949e-07	0	7.64525e-08	5.62164e-07	4.2968e-07	7.69755e-07	1.20155e-07	0	2.41776e-07	1.77759e-07	0	1.02133e-07
Agromyces_sp._Root81	3.06653e-07	6.10142e-07	1.12973e-07	5.78842e-07	1.2129e-06	1.29165e-06	1.72233e-06	1.11348e-06	8.71761e-07	1.27646e-06	1.06646e-06	1.29706e-06	1.19752e-06	1.25278e-07	2.57164e-07	1.29224e-06	1.55366e-06	4.51506e-07	6.01377e-07	1.24086e-06	1.93999e-06	8.01407e-07	1.77043e-07	9.93943e-07
Agromyces_sp._SJ-23	4.09477e-06	4.90803e-06	7.61471e-06	6.15713e-06	6.34992e-06	6.69172e-06	6.5213e-06	3.76088e-06	4.23503e-06	7.49973e-06	6.68061e-06	5.98603e-06	5.59103e-06	5.65666e-06	4.32715e-06	3.68144e-06	4.15175e-06	3.35436e-06	4.47939e-06	1.5906e-06	3.46877e-06	3.28453e-06	2.90624e-06	3.98578e-06
Agromyces_sp._Soil535	8.23497e-06	8.56041e-06	9.02849e-06	8.25416e-06	8.64568e-06	4.7058e-06	7.65944e-06	6.38429e-06	8.62982e-06	9.93259e-06	9.73167e-06	9.36324e-06	9.93013e-06	6.9518e-06	1.098e-05	8.19317e-06	9.01896e-06	1.48151e-05	7.30504e-06	7.87003e-06	1.05754e-05	8.99911e-06	7.18423e-06	7.12725e-06
Agromyces_subbeticus	5.31625e-07	1.80384e-06	2.04448e-06	9.16195e-07	9.69601e-07	1.08762e-06	1.27561e-06	2.29749e-06	8.96334e-07	3.96555e-07	2.09823e-06	2.08463e-06	2.03004e-06	1.73857e-06	1.47116e-06	1.17871e-06	1.0895e-06	5.53911e-07	1.05556e-07	1.21412e-06	1.62091e-06	1.49421e-06	1.48237e-06	7.52255e-07
Agromyces_terreus	0	8.66816e-08	2.8077e-07	7.97183e-07	1.49569e-07	1.08761e-06	5.80712e-07	4.24758e-07	4.30005e-07	4.91949e-07	4.98137e-07	2.97902e-07	6.69123e-07	4.23041e-07	0	7.90033e-07	1.31273e-06	1.37188e-06	1.48486e-06	1.19985e-06	1.22567e-07	3.46522e-07	6.03145e-07	4.76642e-07
Ahniella_affigens	3.5067e-05	3.75516e-05	3.99583e-05	3.27703e-05	3.17252e-05	3.50158e-05	3.46855e-05	3.02928e-05	3.74583e-05	3.9156e-05	3.56008e-05	3.34861e-05	3.89165e-05	2.6665e-05	3.62238e-05	4.10865e-05	2.98907e-05	2.90145e-05	3.49872e-05	2.92233e-05	2.23491e-05	2.10676e-05	2.7212e-05	3.25775e-05
Ahrensia_kielensis	0	0	3.27747e-07	0	0	0	0	3.12611e-07	0	0	0	0	0	0	0	0	0	4.9059e-07	0	4.92274e-07	0	0	0	0
Ahrensia_marina	5.94875e-07	0	5.49534e-07	6.94115e-07	6.48134e-08	1.07194e-07	1.08297e-07	7.67318e-07	0	4.07448e-07	3.65411e-07	5.54732e-07	5.96657e-07	3.79284e-07	1.36886e-07	5.77763e-07	1.05516e-06	1.40919e-06	0	1.20137e-06	6.20769e-07	6.12065e-07	2.5802e-08	0
Ahrensia_sp.	6.63575e-06	7.56411e-06	4.24886e-06	5.51959e-06	6.40483e-06	7.04754e-06	8.19933e-06	8.85837e-06	7.14041e-06	6.50262e-06	9.87768e-06	5.28311e-06	7.33279e-06	5.38392e-06	5.82199e-06	6.06203e-06	8.63918e-06	7.39804e-06	3.25384e-06	8.59192e-06	5.96211e-06	3.89981e-06	5.37547e-06	4.0855e-06
Ahrensia_sp._13_GOM-1096m	0	0	9.1769e-07	0	1.62402e-07	8.77041e-08	2.64315e-07	3.75133e-07	4.54949e-07	2.78657e-07	0	2.55211e-07	7.95919e-08	1.60007e-07	3.78239e-07	6.21802e-07	2.43485e-07	0	0	0	0	1.04434e-07	4.22945e-07	0
Ahrensia_sp._R2A130	1.01752e-06	4.95322e-07	8.1548e-07	2.20439e-06	3.89209e-07	1.26753e-06	5.24751e-07	9.28755e-07	5.64593e-07	4.32986e-07	9.08024e-08	0	2.42104e-07	6.29211e-07	7.34394e-07	9.18425e-07	1.48401e-06	4.55409e-07	1.24495e-06	8.63293e-07	0	8.9347e-07	5.35921e-07	1.68431e-07
Aidingimonas_halophila	2.15261e-06	1.54973e-06	2.03654e-06	4.40196e-06	1.9173e-06	1.19253e-06	1.89412e-06	1.75543e-06	1.04106e-06	8.43858e-07	1.46236e-06	2.67494e-06	2.16282e-06	2.27861e-06	2.53093e-06	1.33438e-06	1.56729e-06	9.57627e-07	1.42263e-06	9.51267e-07	1.77158e-06	6.7935e-07	1.02909e-06	1.43798e-06
Aidingimonas_lacisalsi	2.13591e-06	3.67859e-06	2.70658e-06	2.69308e-06	3.26246e-06	3.15919e-06	2.81372e-06	3.43155e-06	7.96292e-07	1.22082e-06	8.91322e-07	7.43895e-07	2.15952e-06	2.20963e-06	2.16802e-06	2.18327e-06	5.88383e-07	2.19852e-06	4.70104e-07	9.09169e-07	9.22502e-07	3.41379e-07	8.22432e-07	1.19388e-06
Aigarchaeota_archaeon	1.9864e-07	8.66816e-08	5.30385e-07	2.7081e-07	5.27648e-07	0	3.67395e-07	1.76754e-07	8.46058e-08	1.08269e-06	2.25415e-07	3.06627e-07	2.7415e-07	8.28273e-08	7.89729e-08	4.89842e-07	4.28106e-07	0	0	0	9.69761e-08	1.93696e-07	2.11113e-07	0
Aigarchaeota_archaeon_NZ13_MG1	1.4462e-06	1.16683e-06	5.55222e-07	5.67271e-07	9.13811e-07	9.45947e-07	5.52778e-07	1.02536e-06	1.37484e-07	3.44034e-07	2.75452e-07	1.02246e-06	5.27421e-07	8.83565e-07	3.64457e-07	2.79551e-07	0	1.19522e-07	0	0	4.5929e-07	0	3.5298e-07	8.92062e-07
Akanthomyces_lecanii	0	0	0	1.07348e-07	0	0	0	0	3.12127e-07	0	3.05538e-07	0	0	0	0	0	0	0	0	0	0	0	0	0
Akkermansia_glycaniphila	4.41965e-07	1.44956e-06	2.4915e-07	5.76158e-07	1.29769e-06	3.5767e-07	2.20645e-07	2.88586e-07	3.57047e-07	7.67389e-08	6.31935e-07	1.64081e-07	4.34277e-07	4.99103e-07	4.69756e-07	8.47391e-07	1.15945e-07	8.23618e-08	4.03377e-07	3.82713e-07	0	2.01347e-07	3.49017e-08	0
Akkermansia_muciniphila	1.34539e-06	1.26588e-06	3.39211e-06	1.36072e-06	1.36906e-06	1.17021e-06	1.08339e-06	1.2404e-06	1.89397e-06	2.33374e-07	1.1021e-06	1.03844e-06	8.34151e-07	2.41289e-07	8.0329e-07	2.70171e-06	1.29336e-06	6.30062e-07	1.13517e-06	1.5417e-06	1.47442e-06	6.83968e-07	1.19721e-06	1.28366e-06
Akkermansia_muciniphila_CAG:154	0	0	1.88765e-07	0	0	5.30878e-07	9.87014e-08	7.00882e-08	0	0	0	0	0	0	0	1.84704e-07	0	0	0	0	0	0	1.09565e-07	0
Akkermansia_sp.	0	0	0	0	0	0	0	0	0	0	0	0	0	0	0	0	0	0	4.64159e-07	0	0	0	0	5.40876e-07
Akkermansia_sp._BIOML-A60	0	0	0	6.73705e-07	0	0	3.85057e-07	0	0	0	0	3.72041e-07	2.80164e-07	0	9.58205e-08	0	0	0	0	0	0	0	0	0
Akkermansia_sp._CAG:344	1.92092e-07	1.85601e-07	8.77204e-08	0	0	0	0	0	9.0578e-08	0	2.10197e-07	0	0	0	0	0	0	1.32748e-07	0	2.29908e-07	9.0967e-07	2.21537e-07	4.00609e-07	3.90836e-07
Akkermansia_sp._KLE1605	1.70523e-07	3.84226e-07	2.48759e-07	0	1.65066e-07	0	0	7.65578e-08	4.358e-07	0	0	2.028e-07	5.28611e-07	0	3.8008e-07	2.559e-07	0	0	1.06552e-07	0	4.52555e-07	1.57636e-07	0	1.81142e-07
Akkermansiaceae_bacterium	3.71268e-05	3.40003e-05	3.61198e-05	3.58807e-05	2.93849e-05	2.88452e-05	2.71626e-05	2.94066e-05	4.23618e-05	3.97646e-05	5.22193e-05	3.86701e-05	3.96327e-05	3.17497e-05	3.91495e-05	3.85758e-05	4.71561e-05	4.70413e-05	4.02791e-05	4.24432e-05	3.71269e-05	2.7861e-05	3.15641e-05	3.5362e-05
Albibacterium_bauzanense	5.54191e-06	3.181e-06	4.73686e-06	5.3109e-06	6.41046e-06	5.259e-06	7.253e-06	4.13047e-06	4.23265e-06	5.17546e-06	4.49181e-06	4.0383e-06	5.07484e-06	3.66861e-06	4.60095e-06	3.97279e-06	5.36848e-06	3.70235e-06	3.05999e-06	2.38384e-06	6.34732e-06	1.82347e-06	5.02676e-06	3.80004e-06
Albidiferax_sp._OV413	2.14695e-05	2.02514e-05	1.93926e-05	1.84335e-05	1.73692e-05	1.45488e-05	1.39257e-05	1.71865e-05	2.63583e-05	1.22833e-05	1.71132e-05	1.64108e-05	1.18962e-05	1.25085e-05	1.13105e-05	1.2366e-05	1.65381e-05	2.06095e-05	1.57588e-05	1.85402e-05	1.51409e-05	1.11869e-05	1.79341e-05	1.74591e-05
Albidovulum_inexpectatum	9.38538e-07	5.35019e-07	7.58111e-07	2.21615e-06	6.62944e-07	8.39572e-07	3.62005e-07	1.34966e-07	2.00824e-07	1.57716e-06	2.15687e-06	1.46577e-06	1.71675e-06	1.45799e-06	1.48543e-07	1.53678e-06	2.08209e-06	1.62521e-06	9.09988e-07	5.32467e-07	1.09155e-06	1.91534e-07	1.41397e-07	1.25837e-06
Albidovulum_xiamenense	9.80587e-07	2.29536e-06	1.96951e-06	1.35342e-06	2.2812e-06	1.75093e-06	1.86623e-06	1.33885e-06	9.40149e-07	2.62917e-06	3.09461e-06	2.7574e-06	2.69303e-06	1.54424e-06	3.23466e-06	1.87841e-06	1.09089e-06	1.50003e-06	5.74986e-07	3.02306e-06	2.22934e-06	4.57136e-07	1.61314e-06	2.11103e-07
Albimonas_donghaensis	3.97925e-06	1.75845e-06	2.54505e-06	2.52155e-06	1.14621e-06	2.56333e-06	2.53993e-06	1.75573e-06	1.69341e-06	2.11218e-06	2.3157e-06	2.22848e-06	2.61069e-06	1.14032e-06	1.58583e-06	3.75173e-06	2.76755e-06	3.77136e-06	1.56393e-06	1.60688e-06	3.38724e-06	2.16627e-06	1.77808e-06	2.48745e-06
Albimonas_pacifica	4.05076e-06	3.43752e-06	3.79984e-06	5.02607e-06	2.67856e-06	3.36386e-06	2.98715e-06	2.47065e-06	3.63507e-06	2.80524e-06	6.1793e-06	1.66721e-06	4.62006e-06	4.08656e-06	4.24023e-06	3.25579e-06	4.35448e-06	5.93945e-06	6.55867e-06	4.6107e-06	3.54112e-06	4.25994e-06	8.43191e-06	5.30138e-06
Alcaligenaceae_bacterium	9.02193e-05	9.25419e-05	8.7615e-05	9.7477e-05	7.62126e-05	8.8085e-05	8.32946e-05	8.5544e-05	7.98031e-05	6.79079e-05	7.43876e-05	7.30715e-05	8.15602e-05	5.86664e-05	8.05209e-05	7.35166e-05	7.32243e-05	7.52839e-05	7.08139e-05	6.62252e-05	6.65033e-05	6.26068e-05	7.06459e-05	7.57047e-05
Alcaligenaceae_bacterium_429	2.33741e-06	1.62831e-06	1.63348e-06	6.49118e-07	1.85636e-06	1.07247e-06	1.42837e-06	7.22961e-07	1.15436e-06	9.82097e-07	1.16801e-06	1.61267e-06	1.16246e-06	2.48476e-07	6.47382e-07	2.73593e-07	7.11014e-07	1.01612e-06	7.11404e-07	2.0461e-06	1.50617e-06	1.17561e-06	6.85703e-07	3.51172e-06
Alcaligenaceae_bacterium_SAGV3	0	0	0	0	0	0	0	0	0	1.02549e-07	5.94995e-07	0	0	3.57465e-07	1.89119e-07	0	1.2815e-07	1.48468e-07	0	0	0	0	0	0
Alcaligenaceae_bacterium_SJ-26	2.45595e-06	2.81945e-06	4.00157e-06	2.64113e-06	2.61777e-06	1.77757e-06	2.40908e-06	2.9468e-06	1.56023e-06	2.12537e-06	2.81216e-06	1.11478e-06	3.07567e-06	1.40904e-06	1.76525e-06	2.1786e-06	3.24005e-06	7.7441e-06	2.30514e-06	1.54802e-06	2.9505e-06	4.11082e-06	3.02389e-06	4.99542e-06
Alcaligenes_aquatilis	7.8643e-07	1.24894e-06	7.84867e-08	2.0774e-07	3.26839e-07	5.17383e-07	9.17315e-07	3.75133e-07	9.27895e-07	1.05321e-07	2.60511e-07	8.71972e-08	2.68892e-07	3.0872e-07	1.02665e-07	3.25519e-07	2.63227e-07	3.20892e-07	3.05258e-07	1.41363e-07	0	2.12641e-07	7.26481e-07	3.89211e-07
Alcaligenes_faecalis	8.43949e-06	6.2312e-06	1.20282e-05	7.16083e-06	4.06234e-06	6.5176e-06	4.56838e-06	5.26885e-06	6.00834e-06	3.50922e-06	5.42898e-06	5.88771e-06	3.54742e-06	3.32722e-06	8.34789e-06	4.21231e-06	5.97876e-06	3.88638e-06	4.22601e-06	3.733e-06	6.45615e-06	5.94402e-06	3.79345e-06	5.75164e-06
Alcaligenes_sp._EGD-AK7	2.91011e-07	9.02722e-07	1.96435e-07	5.89892e-07	4.17353e-07	8.21059e-08	1.40429e-07	8.93175e-08	8.27863e-08	8.38038e-08	4.19328e-07	1.98572e-07	0	7.32379e-08	4.10389e-07	1.14594e-07	1.52975e-07	5.90763e-08	0	3.62843e-07	6.61631e-08	0	1.44653e-07	4.72224e-07
Alcaligenes_sp._NyZ215	2.15807e-07	0	1.06518e-07	4.90355e-07	9.86291e-08	0	0	2.17469e-07	0	0	6.99856e-07	0	1.87979e-07	4.19249e-07	0	0	0	7.62188e-07	0	0	0	0	0	1.18525e-07
Alcaligenes_sp._O-1	2.13175e-07	7.83237e-07	0	1.08819e-07	2.55249e-07	9.41214e-08	0	9.1496e-08	0	0	0	4.67887e-08	9.52748e-08	0	0	0	0	0	0	0	0	0	0	0
Alcanivoracaceae_bacterium	0	0	0	3.5669e-07	0	0	0	0	7.74135e-07	1.65824e-07	7.72184e-07	3.8009e-07	1.79592e-07	1.7415e-07	3.09038e-07	0	2.30097e-07	0	0	0	0	8.88797e-08	3.16902e-07	0
Alcanivorax_borkumensis	2.00104e-08	0	0	1.14975e-06	0	0	0	0	0	0	2.70452e-07	0	0	0	1.6333e-07	3.31628e-07	4.32863e-07	0	0	0	9.80536e-08	0	0	0
Alcanivorax_dieselolei	1.89608e-06	3.74102e-06	2.08709e-06	2.01048e-06	1.30802e-06	1.95114e-06	2.13581e-06	1.43108e-06	1.47325e-06	2.09851e-06	2.61778e-06	2.24847e-06	2.44655e-06	1.60682e-06	3.78993e-06	2.17949e-06	9.20328e-07	2.53921e-06	1.07208e-06	1.93106e-06	3.01187e-06	1.88235e-06	1.93752e-06	2.78738e-06
Alcanivorax_gelatiniphagus	8.23868e-06	1.06792e-05	7.15599e-06	1.26243e-05	9.13278e-06	1.02319e-05	1.09963e-05	9.7623e-06	5.71892e-06	5.52689e-06	4.24328e-06	5.33093e-06	1.29617e-05	1.23514e-05	1.31491e-05	9.06351e-06	2.27525e-06	4.1008e-06	2.43276e-06	2.65087e-06	7.02818e-06	3.8792e-06	7.38886e-06	6.43527e-06
Alcanivorax_hongdengensis	1.27392e-06	1.40623e-06	1.0074e-06	1.25953e-06	1.21025e-06	1.14456e-06	1.60624e-06	8.54271e-07	4.99021e-07	1.45363e-06	9.23691e-07	1.16212e-06	1.30726e-06	1.1231e-06	1.22562e-06	2.40873e-06	2.11372e-06	1.05511e-06	6.43564e-07	1.93719e-07	8.72082e-07	1.63817e-07	2.82385e-07	3.11276e-07
Alcanivorax_indicus	2.05476e-06	8.65906e-07	2.07633e-06	1.39439e-06	2.02822e-06	1.32752e-06	1.4778e-06	8.23444e-07	2.35762e-06	1.4402e-06	8.53863e-07	2.23977e-07	8.09185e-07	1.37955e-06	6.30916e-07	1.11122e-06	1.18759e-06	5.29374e-07	1.02019e-06	2.08229e-06	1.83345e-06	1.62783e-06	9.94656e-07	1.19417e-06
Alcanivorax_jadensis	2.97961e-07	1.86038e-07	9.11585e-07	0	6.9443e-08	5.90086e-07	1.53126e-07	3.90389e-07	5.94864e-07	1.76075e-07	1.15386e-06	3.89458e-07	6.37428e-07	6.4243e-07	5.50516e-08	4.20452e-07	0	1.06449e-07	5.32762e-08	0	0	8.52519e-08	0	2.74995e-07
Alcanivorax_mobilis	4.25787e-06	3.97333e-06	2.96145e-06	7.62692e-06	6.24653e-06	4.79038e-06	4.08566e-06	5.68664e-06	3.87593e-06	4.11413e-06	2.41492e-06	4.07755e-06	7.17213e-06	7.05013e-06	8.00313e-06	5.91583e-06	1.35315e-06	2.44642e-06	2.9076e-06	1.21677e-06	3.00771e-06	1.88855e-06	2.69656e-06	3.3698e-06
Alcanivorax_nanhaiticus	3.79011e-07	1.23954e-06	6.38961e-07	1.50949e-06	1.11821e-06	8.15783e-07	1.64359e-06	9.21054e-07	1.33296e-06	2.32649e-07	7.04165e-07	6.41972e-07	8.65677e-07	9.49224e-07	9.46834e-07	2.14787e-06	7.15416e-07	3.95915e-07	1.9815e-07	5.56795e-07	1.43222e-06	2.14261e-07	5.84839e-07	9.22632e-07
Alcanivorax_pacificus	2.28729e-06	2.8352e-06	2.2723e-06	2.60341e-06	1.54764e-06	1.95403e-06	2.65838e-06	1.51788e-06	2.07349e-06	4.10074e-06	2.45778e-06	2.2118e-06	4.18739e-06	3.10501e-06	3.71302e-06	1.98379e-06	7.55873e-07	2.15875e-06	9.31765e-07	1.10596e-06	1.04e-06	1.49797e-06	2.54802e-06	1.57311e-06
Alcanivorax_profundi	6.69102e-07	4.5855e-07	1.67957e-06	8.45257e-07	2.16243e-06	1.52169e-06	7.04156e-07	2.54363e-06	2.40561e-06	4.53667e-06	1.51801e-06	6.87525e-06	1.74112e-06	1.15512e-05	3.13674e-06	3.00316e-06	4.6916e-06	5.62612e-06	8.19663e-06	1.31161e-05	1.82878e-06	2.03598e-05	9.92027e-06	6.37169e-06
Alcanivorax_sp.	1.97895e-05	2.1468e-05	1.67353e-05	2.43427e-05	2.00178e-05	1.94086e-05	2.12658e-05	2.16752e-05	1.16288e-05	1.37362e-05	1.43778e-05	1.61542e-05	2.35174e-05	2.53654e-05	3.12353e-05	2.2419e-05	9.02943e-06	1.23675e-05	7.15551e-06	9.60318e-06	1.33358e-05	8.75684e-06	1.26711e-05	1.29774e-05
Alcanivorax_sp._24	1.51888e-06	4.3054e-07	9.82605e-07	2.14814e-06	6.01821e-07	1.05227e-06	1.12168e-06	3.66028e-07	7.79836e-07	8.16293e-07	7.29868e-07	4.7739e-07	1.32946e-06	1.64457e-06	1.83149e-06	1.2015e-06	6.63987e-07	1.50448e-07	3.1211e-07	1.01388e-06	5.587e-07	6.89436e-07	7.59265e-08	1.26323e-07
Alcanivorax_sp._43B_GOM-46m	0	0	0	0	1.89039e-07	5.38462e-07	0	0	0	0	0	0	1.94558e-07	3.77324e-07	0	0	0	0	0	0	0	0	0	0
Alcanivorax_sp._6-D-6	3.68589e-06	3.65635e-06	2.46202e-06	6.28217e-06	3.65115e-06	3.74645e-06	6.02943e-06	4.93944e-06	1.38364e-06	2.53979e-06	3.1523e-06	2.25881e-06	2.67975e-06	3.83229e-06	4.04506e-06	3.04354e-06	1.221e-06	2.11596e-06	6.59855e-07	2.58589e-06	1.9404e-06	1.31067e-06	2.31566e-06	1.72472e-06
Alcanivorax_sp._97CO-6	0	0	0	1.1682e-07	0	0	0	3.31e-07	2.29825e-07	0	0	2.08232e-07	0	1.28148e-07	1.07262e-07	2.75314e-07	0	0	0	0	3.95141e-07	0	0	0
Alcanivorax_sp._Alg238-V104	1.58738e-06	1.9208e-06	1.85934e-06	3.40674e-06	1.50487e-06	1.7617e-06	1.31278e-06	1.82612e-06	1.71539e-06	8.51297e-07	2.88362e-06	1.10856e-06	9.79747e-07	1.93921e-06	2.23247e-06	8.82851e-07	4.09866e-07	1.59241e-06	9.59156e-07	1.07837e-06	1.87072e-06	1.04265e-06	1.96454e-06	2.02041e-06
Alcanivorax_sp._DG881	1.87989e-07	0	1.64616e-07	9.6838e-07	3.1387e-07	9.16641e-07	4.6776e-07	0	9.5051e-08	1.47832e-06	1.69362e-07	2.79892e-07	3.57117e-07	3.20542e-07	2.90064e-07	3.24972e-07	0	0	0	0	8.61568e-07	0	0	0
Alcanivorax_sp._DP30	1.32733e-06	1.07602e-06	5.59764e-07	1.82344e-06	3.5102e-07	4.96183e-07	2.5251e-07	8.46716e-07	1.46052e-06	9.91145e-07	4.98896e-07	1.03585e-06	1.50282e-06	1.04471e-06	1.34768e-06	1.78946e-07	6.95272e-07	2.61175e-06	4.47821e-06	9.14419e-07	1.23095e-06	1.22005e-06	9.96449e-07	1.55147e-06
Alcanivorax_sp._DSM_26293	0	3.1137e-07	0	2.09046e-07	0	0	0	9.87193e-08	0	0	5.2601e-07	0	0	8.93663e-08	0	4.95768e-07	2.563e-07	8.46726e-07	0	1.055e-06	2.64048e-07	0	0	2.60225e-07
Alcanivorax_sp._DSM_26295	3.63295e-07	1.50734e-06	2.4076e-07	6.70245e-07	1.35112e-06	7.52047e-07	8.10744e-07	6.64943e-07	1.7384e-07	4.52118e-07	3.1839e-07	3.89773e-07	9.00099e-07	9.63409e-07	1.06465e-06	1.10066e-06	3.86011e-07	1.14791e-06	6.92917e-08	0	3.79062e-07	1.64895e-07	3.63251e-07	5.94792e-07
Alcanivorax_sp._EA2	1.38653e-06	1.34894e-06	1.82527e-06	1.04934e-06	3.11728e-07	3.98526e-07	1.36328e-06	1.05762e-06	5.79496e-07	5.15604e-07	8.29493e-07	2.61592e-07	9.84134e-07	6.68006e-07	1.70727e-06	1.44392e-06	0	1.4654e-07	4.34547e-07	2.83191e-07	1.14608e-07	8.61308e-08	5.59462e-07	1.24682e-07
Alcanivorax_sp._HI0003	0	0	9.09297e-08	9.68751e-08	1.65986e-07	0	9.74676e-08	0	0	0	8.29485e-07	3.48789e-07	1.75102e-07	1.69796e-07	0	1.77947e-07	5.26455e-07	2.82089e-07	7.2536e-07	0	1.1031e-07	0	3.20691e-07	0
Alcanivorax_sp._HI0007	2.39457e-07	4.4914e-07	0	1.91416e-07	3.94404e-07	6.19366e-07	1.46733e-07	0	6.70842e-07	2.08761e-07	9.42075e-08	3.45637e-07	5.30613e-08	4.90976e-07	0	4.90968e-07	1.33417e-07	0	8.37143e-07	4.48321e-07	0	4.57791e-07	6.22005e-07	2.31338e-07
Alcanivorax_sp._HI0013	0	0	0	0	0	0	0	0	0	0	0	0	0	0	0	0	4.17404e-07	0	0	0	0	0	0	0
Alcanivorax_sp._HI0033	0	0	0	0	0	0	0	0	8.84957e-08	0	2.59883e-07	0	0	0	0	0	0	0	0	0	0	0	0	0
Alcanivorax_sp._HI0035	0	0	0	0	0	0	0	0	0	0	0	4.16464e-07	0	0	0	0	0	0	1.68575e-07	3.97247e-07	0	0	1.09565e-07	0
Alcanivorax_sp._HI0044	0	0	0	6.18682e-07	0	0	9.62643e-08	0	1.63811e-07	0	4.52354e-07	0	1.60982e-07	8.38498e-08	0	1.80143e-07	0	0	0	0	0	0	0	0
Alcanivorax_sp._HI0083	8.41421e-07	9.3701e-07	6.00927e-07	7.53202e-07	8.04521e-07	0	0	1.1198e-07	1.05468e-07	8.69427e-07	2.16982e-07	3.93252e-07	1.67075e-07	2.57918e-07	6.27277e-07	4.00626e-07	1.43227e-07	6.36474e-07	4.77234e-07	0	2.5407e-07	7.13055e-07	7.47447e-07	4.07589e-07
Alcanivorax_sp._IO_7	1.52445e-07	0	0	1.44256e-07	5.75291e-07	2.33564e-07	0	0	3.12947e-07	8.41746e-07	1.31071e-07	4.24965e-07	2.08635e-07	9.21447e-07	2.2962e-07	7.68306e-07	0	0	3.67302e-07	0	0	3.18079e-07	5.47944e-07	1.11634e-07
Alcanivorax_sp._KX64203	2.294e-06	1.6917e-06	4.81399e-07	1.92008e-06	2.06357e-06	1.78862e-06	1.80958e-06	1.68515e-06	1.34319e-06	1.02126e-06	1.14269e-06	1.44253e-06	2.26447e-06	2.90547e-06	2.46047e-06	2.56267e-06	2.28464e-06	1.00337e-06	6.75907e-07	6.83645e-07	1.58126e-06	3.05423e-07	1.45906e-06	1.16693e-06
Alcanivorax_sp._MD8A	3.12904e-07	0	7.84867e-08	2.00263e-07	0	7.23198e-07	6.63675e-07	1.02776e-07	7.97993e-07	2.70843e-07	5.95054e-07	5.70643e-07	2.85246e-07	4.12323e-07	2.05707e-07	9.99426e-08	2.29163e-07	4.41887e-07	1.90788e-06	2.04833e-07	2.93687e-07	8.49274e-07	4.91717e-07	4.95319e-07
Alcanivorax_sp._N3-2A	1.18367e-05	1.48675e-05	1.01455e-05	1.70778e-05	1.41152e-05	1.15241e-05	1.63328e-05	1.54409e-05	6.78265e-06	1.1334e-05	7.07231e-06	7.78288e-06	1.37274e-05	1.68617e-05	1.81315e-05	1.24821e-05	3.68082e-06	2.62049e-06	3.31628e-06	4.23329e-06	7.13657e-06	5.97147e-06	5.75025e-06	4.66281e-06
Alcanivorax_sp._NBRC_101098	0	0	2.66416e-07	0	1.49937e-07	7.71796e-07	7.85438e-07	6.25222e-08	0	0	0	1.5369e-07	0	3.92314e-07	5.98878e-08	1.82395e-07	4.41881e-07	0	0	0	1.20888e-07	2.7849e-07	0	6.11542e-07
Alcanivorax_sp._NBRC_102024	2.89462e-07	3.53195e-07	1.77688e-07	0	1.30873e-07	2.46318e-07	8.51226e-07	7.98156e-08	8.62595e-07	0	0	9.34666e-07	7.22071e-08	4.72528e-07	7.52017e-07	0	0	0	5.92964e-07	0	8.06551e-07	4.79765e-07	2.80655e-07	3.75914e-07
Alcanivorax_sp._NBRC_102028	1.07903e-07	0	0	0	0	0	0	0	2.85153e-07	4.04982e-07	3.9162e-07	0	0	5.06853e-07	0	9.00717e-08	0	1.39303e-07	0	1.56132e-07	2.40662e-07	0	0	2.37051e-07
Alcanivorax_sp._Nap_24	0	1.85601e-07	0	0	0	0	0	0	2.71734e-07	0	2.37373e-07	3.29564e-07	0	0	9.2135e-08	2.41994e-07	6.14039e-07	0	2.77679e-07	2.46137e-07	0	3.03692e-07	2.72618e-07	7.55949e-08
Alcanivorax_sp._P2S70	1.26669e-07	3.03386e-07	0	0	1.97258e-07	0	0	1.08734e-07	4.07496e-07	0	0	1.01098e-07	0	3.07109e-08	0	0	3.97451e-07	0	5.9445e-07	0	1.27896e-07	4.8433e-07	1.08195e-07	7.6462e-07
Alcanivorax_sp._PA15-N-34	1.20842e-06	1.84843e-06	7.58996e-07	1.22021e-06	1.20597e-06	9.79793e-07	1.12957e-06	1.7975e-06	2.79899e-06	1.90773e-06	6.44318e-07	1.00031e-06	6.84501e-07	1.06678e-06	1.28692e-06	7.12661e-07	4.11525e-07	6.80078e-07	1.02678e-07	5.17324e-07	1.24366e-06	1.42662e-06	9.77672e-07	1.74845e-06
Alcanivorax_sp._PN-3	3.23665e-07	5.33071e-07	7.55969e-07	9.00331e-07	7.28212e-07	6.39409e-07	3.34725e-07	2.46945e-07	4.5289e-08	8.38031e-07	9.54e-08	4.2431e-07	7.60196e-07	1.71945e-07	5.51977e-07	2.85718e-07	1.108e-07	1.4283e-07	0	0	0	0	2.82677e-07	6.76234e-07
Alcanivorax_sp._S71-1-4	2.59371e-06	3.77592e-06	2.16724e-06	3.545e-06	2.79085e-06	2.79643e-06	4.40337e-06	4.19328e-06	2.74008e-06	3.33809e-06	3.38941e-06	2.75695e-06	2.65297e-06	4.03136e-06	3.71315e-06	2.65593e-06	1.16837e-06	1.90048e-06	1.31319e-06	1.75816e-06	1.56245e-06	1.47193e-06	2.32394e-06	2.20517e-06
Alcanivorax_sp._VBW004	1.12054e-07	2.06667e-07	7.86217e-07	0	8.61444e-08	1.13499e-07	3.44003e-07	9.49705e-08	1.06926e-06	4.10579e-07	1.07532e-06	8.85457e-07	6.39416e-07	0	2.35509e-07	0	2.54897e-07	9.54226e-07	4.2922e-07	2.43701e-07	3.57763e-07	0	2.76243e-07	3.69252e-07
Alcanivorax_sp._ZXX171	1.2381e-06	1.26821e-06	1.54839e-06	1.02611e-06	1.16346e-06	2.22521e-06	1.55595e-06	2.26902e-06	8.73606e-07	6.45112e-07	1.04108e-06	9.85097e-07	1.9195e-06	2.38505e-06	2.25457e-06	1.39821e-06	9.13243e-07	1.42631e-06	1.6614e-06	1.50197e-06	7.82563e-07	1.13824e-06	9.8161e-07	1.25444e-06
Alcanivorax_xenomutans	2.99639e-06	3.4449e-06	1.69945e-06	3.54899e-06	2.77671e-06	4.22829e-06	5.93731e-06	3.55715e-06	1.86128e-06	3.34022e-06	1.48656e-06	2.03873e-06	3.6408e-06	4.2801e-06	5.59985e-06	5.40468e-06	1.61546e-06	3.13633e-06	6.01544e-07	1.65627e-06	2.41179e-06	1.30304e-06	9.38125e-07	2.05779e-06
Aldersonia_kunmingensis	2.3371e-06	2.59814e-06	1.96881e-06	3.38293e-06	3.27047e-06	6.38514e-06	3.85498e-06	4.73304e-06	3.65379e-06	2.82614e-06	2.63338e-06	3.44362e-06	3.05227e-06	3.40925e-06	3.55251e-06	3.63979e-06	3.06547e-06	1.68121e-06	3.06472e-06	3.57309e-06	2.7867e-06	1.89029e-06	3.54711e-06	1.13766e-06
Alfalfa_leaf_curl_virus	0	0	0	0	0	0	0	0	0	0	0	0	0	0	5.20763e-08	0	0	0	0	0	0	0	4.80512e-06	6.26123e-07
Algibacter_aestuarii	2.07489e-06	4.98372e-07	4.70767e-07	5.41152e-07	6.0943e-07	1.09408e-06	6.37085e-07	9.49705e-08	6.57419e-07	1.62966e-07	8.10333e-07	1.26785e-06	1.22242e-06	1.23035e-06	3.684e-07	1.30021e-06	3.93319e-07	9.40986e-07	1.06396e-06	5.77396e-07	1.27857e-06	0	4.34565e-07	1.23155e-06
Algibacter_alginicilyticus	0	0	0	5.22615e-07	0	2.11451e-07	3.73848e-07	1.92094e-07	8.27863e-08	0	8.10387e-08	0	5.12784e-07	1.86078e-07	7.35234e-07	4.99713e-08	0	0	4.03377e-07	0	0	0	1.03043e-07	0
Algibacter_amylolyticus	3.95762e-07	0	7.93216e-08	1.54807e-07	1.2045e-07	1.94232e-07	1.50255e-06	3.8208e-07	4.4766e-07	9.35519e-07	5.6296e-07	1.13564e-06	3.3772e-07	1.20209e-07	1.35603e-06	2.59431e-07	1.77028e-06	1.47349e-06	1.82443e-06	1.34113e-07	2.14717e-06	9.06228e-07	2.08274e-07	1.32041e-06
Algibacter_aquaticus	1.36686e-07	0	1.76639e-07	3.22044e-07	2.61747e-07	5.63327e-08	5.18867e-07	4.82455e-07	4.33101e-07	1.9731e-07	1.50141e-06	6.53059e-07	0	1.7415e-07	1.15712e-06	1.34061e-07	1.33417e-07	9.27417e-07	1.5472e-07	3.93341e-07	9.00492e-08	6.55406e-07	6.31116e-07	1.34239e-06
Algibacter_lectus	0	2.41336e-08	6.03793e-07	2.83706e-07	1.62034e-07	5.9982e-07	1.77581e-07	6.23087e-07	0	2.78348e-07	9.54e-08	1.6609e-07	0	3.76152e-07	0	3.69408e-07	7.41043e-07	0	0	0	2.06232e-07	0	9.40828e-08	0
Algibacter_pectinivorans	0	0	4.08561e-07	0	0	0	0	3.08329e-07	0	0	0	0	0	0	0	0	1.50999e-07	8.74696e-08	0	2.43275e-07	0	6.4765e-08	0	2.23269e-07
Algibacter_sp._H164	9.89972e-07	1.13884e-06	3.78098e-07	8.57414e-07	3.18444e-07	4.72899e-07	8.95945e-07	1.0065e-06	7.30458e-07	3.32017e-07	7.84083e-07	2.48119e-07	7.62629e-07	7.73953e-07	8.7685e-07	1.46938e-06	1.33417e-07	1.95669e-07	6.52864e-08	2.80942e-07	1.20888e-07	0	0	2.21978e-07
Algibacter_sp._L1A34	4.20545e-07	0	0	1.8054e-07	0	0	5.90713e-08	0	0	3.46389e-07	1.6748e-07	0	0	3.859e-07	0	1.60606e-07	0	5.64179e-07	2.5099e-07	3.48694e-07	1.19254e-07	3.62752e-07	1.87733e-07	0
Algibacter_sp._L3A6	2.43523e-07	4.47365e-07	7.16946e-08	3.56804e-07	6.93718e-07	4.4959e-07	0	1.20384e-07	2.9612e-07	1.9731e-07	6.88612e-07	0	0	1.30612e-07	2.76405e-07	1.2901e-07	0	0	0	5.10284e-07	8.48541e-08	0	0	0
Algibacter_sp._RHA_19	4.78889e-07	2.30457e-07	1.99195e-07	1.0186e-07	1.90239e-07	2.33361e-07	4.50717e-07	1.58507e-07	2.23403e-07	6.38832e-08	5.16494e-07	3.38094e-07	3.9575e-07	3.19135e-07	2.25895e-07	4.1481e-07	3.87913e-07	8.5196e-07	7.91777e-07	1.93719e-07	2.68014e-07	8.95864e-07	4.65795e-07	3.73731e-07
Algibacter_sp._XY-114	5.1892e-07	1.59039e-07	4.5254e-07	2.40244e-07	4.88912e-07	3.76462e-07	1.3321e-07	1.21876e-06	3.88077e-07	0	2.36439e-07	2.54074e-07	7.45116e-08	0	7.50657e-07	1.81841e-07	1.03611e-07	1.50448e-07	4.30268e-07	8.40789e-07	6.3948e-07	0	2.30816e-07	5.40876e-07
Algibacter_sp._ZY111	0	5.69175e-07	1.09651e-07	0	8.45278e-07	2.25342e-07	0	0	0	5.84531e-07	0	4.14402e-07	1.32153e-07	4.69436e-07	0	7.98248e-07	1.09487e-06	6.01791e-07	9.34937e-07	1.3076e-07	1.29777e-07	0	2.30816e-07	6.40036e-07
Algibacter_wandonensis	0	0	2.98249e-10	6.39794e-07	0	0	0	0	2.0531e-07	1.03917e-10	0	2.71783e-07	3.63849e-07	0	0	0	8.26932e-07	0	7.52456e-07	0	1.08948e-07	2.06289e-07	8.16568e-08	3.55576e-07
Algicola_sagamiensis	2.5848e-07	1.1725e-06	8.33138e-07	1.37034e-06	7.38228e-07	1.01599e-06	2.25346e-06	1.45222e-06	3.20797e-07	4.14323e-07	1.05944e-06	1.09381e-06	1.23073e-06	1.18058e-06	8.26038e-08	9.44653e-07	1.6786e-06	0	2.75477e-07	3.97311e-07	9.19253e-08	1.41769e-07	5.64647e-07	1.33341e-07
Algicola_sp.	5.06266e-06	5.23987e-06	5.86041e-06	5.41398e-06	4.16313e-06	5.8056e-06	5.26348e-06	5.45649e-06	4.39758e-06	3.87779e-06	9.23194e-06	6.64023e-06	5.35569e-06	5.63496e-06	4.59502e-06	4.62167e-06	6.04553e-06	5.42196e-06	8.79751e-06	8.28322e-06	6.71046e-06	6.17525e-06	5.07619e-06	6.48592e-06
Alginatibacterium_sediminis	0	2.99545e-07	3.28952e-07	2.83706e-07	2.72368e-07	3.6961e-07	1.99966e-07	9.74373e-08	2.49066e-07	8.03538e-07	1.76517e-07	5.30765e-07	3.42954e-07	6.46842e-08	5.3461e-07	8.43115e-07	0	0	6.05856e-07	6.80635e-07	4.67734e-07	2.26838e-07	3.76331e-07	3.99803e-07
Algiphilus_aromaticivorans	1.16051e-05	8.42043e-06	8.70348e-06	8.87193e-06	5.50873e-06	5.4674e-06	6.17198e-06	5.13624e-06	1.24222e-05	1.49565e-05	1.75088e-05	1.61058e-05	1.67894e-05	6.29906e-06	1.48703e-05	9.783e-06	1.49807e-05	1.04264e-05	1.30438e-05	9.61923e-06	7.37559e-06	5.86503e-06	6.02811e-06	7.64044e-06
Algisphaera_agarilytica	2.41104e-05	2.90099e-05	3.49566e-05	3.15985e-05	3.6004e-05	3.88838e-05	3.43455e-05	2.7514e-05	1.98563e-05	2.67516e-05	2.21237e-05	2.62785e-05	2.49067e-05	2.17095e-05	2.94134e-05	3.30575e-05	1.5649e-05	1.81612e-05	1.58419e-05	1.39137e-05	2.06953e-05	1.6266e-05	1.70785e-05	2.44707e-05
Algoriella_xinjiangensis	6.47422e-06	5.62117e-06	4.66577e-06	4.61464e-06	4.48196e-06	4.77297e-06	5.01385e-06	5.12706e-06	6.53074e-06	7.71492e-06	6.39777e-06	5.31669e-06	7.16538e-06	3.72408e-06	5.80703e-06	5.21784e-06	6.74432e-06	5.56979e-06	4.57037e-06	7.70967e-06	6.38131e-06	6.74912e-06	6.58446e-06	7.65105e-06
Algoriphagus_alkaliphilus	3.03481e-06	2.2203e-06	3.80083e-06	3.73191e-06	1.68706e-06	2.33799e-06	1.86662e-06	1.13836e-06	2.99016e-06	2.21547e-06	3.10361e-06	3.98761e-06	4.00394e-06	3.3103e-06	4.66996e-06	2.29763e-06	4.67048e-06	5.34808e-06	5.76447e-06	2.85527e-06	3.27095e-06	3.74638e-06	2.58634e-06	3.8487e-06
Algoriphagus_antarcticus	3.84196e-06	4.60761e-06	5.64888e-06	4.54369e-06	4.39995e-06	4.63041e-06	6.82587e-06	3.10926e-06	3.43928e-06	5.66915e-06	5.11419e-06	3.80505e-06	4.66158e-06	4.24269e-06	4.013e-06	3.37147e-06	4.64947e-06	7.88524e-06	4.4223e-06	5.91474e-06	4.91099e-06	4.96974e-06	4.41681e-06	4.25557e-06
Algoriphagus_aquaeductus	4.00448e-06	2.93273e-06	1.78092e-06	3.24445e-06	1.45524e-06	2.58146e-06	2.89088e-06	2.79905e-06	2.58241e-06	2.34767e-06	3.64487e-06	3.64462e-06	2.57747e-06	3.56746e-06	3.05519e-06	2.10995e-06	4.87714e-06	6.74588e-06	3.89962e-06	4.53549e-06	6.80767e-06	3.74652e-06	2.8565e-06	4.68443e-06
Algoriphagus_aquimarinus	3.16387e-06	3.65998e-06	5.62182e-06	2.38611e-06	2.80011e-06	3.57521e-06	2.43369e-06	3.78418e-06	1.71158e-06	3.18039e-06	4.83887e-06	3.83474e-06	3.24594e-06	3.66925e-06	3.08938e-06	3.53408e-06	5.05203e-06	2.15526e-06	5.4365e-06	3.80914e-06	5.34558e-06	2.78533e-06	2.96624e-06	2.93157e-06
Algoriphagus_aquimaris	1.18111e-07	0	1.65694e-07	1.00554e-07	3.02463e-07	0	8.66379e-08	3.33452e-07	1.27842e-06	3.34018e-07	0	2.53665e-07	6.77664e-07	1.60176e-07	2.08305e-07	2.11473e-07	8.85402e-08	0	9.46516e-07	0	0	5.37729e-07	0	6.40474e-07
Algoriphagus_boritolerans	2.00735e-06	3.10119e-06	4.27335e-06	2.67699e-06	3.63572e-06	3.93153e-06	3.06467e-06	2.7753e-06	2.0471e-06	2.7153e-06	3.13237e-06	2.47411e-06	2.72033e-06	2.19925e-06	3.21569e-06	2.55972e-06	2.2982e-06	3.98074e-06	4.54656e-06	4.09082e-06	4.629e-06	4.39758e-06	4.00439e-06	3.71571e-06
Algoriphagus_boseongensis	1.27226e-06	1.8679e-06	1.72837e-06	1.70032e-06	1.39484e-06	1.20299e-06	2.47726e-06	2.05916e-06	1.68231e-06	2.98846e-06	1.99555e-06	1.20668e-06	2.07922e-06	1.66057e-06	1.80932e-06	1.26382e-06	1.77155e-06	4.01538e-06	1.7419e-06	2.53537e-06	1.76705e-06	9.41635e-07	2.20658e-06	5.1044e-07
Algoriphagus_chordae	1.20145e-06	1.29096e-06	1.66049e-06	1.23505e-06	1.40263e-06	1.24545e-06	9.40788e-07	1.37699e-06	2.38459e-06	2.27105e-06	1.35005e-06	1.39345e-06	2.7772e-06	1.12236e-06	2.27572e-06	1.31164e-06	3.02857e-06	3.03312e-06	2.57524e-06	2.81264e-06	2.21803e-06	2.33758e-06	2.6236e-06	1.15247e-06
Algoriphagus_faecimaris	9.23813e-07	1.96395e-06	1.66104e-06	1.19466e-06	1.1463e-06	1.71501e-06	1.66326e-06	1.19248e-06	6.89697e-07	9.94958e-07	1.32265e-06	1.03284e-06	9.3199e-07	6.31738e-07	1.23118e-06	1.64965e-06	2.09756e-06	1.52349e-06	2.35459e-06	1.95388e-06	2.09421e-06	9.7803e-07	6.4811e-07	1.75525e-06
Algoriphagus_formosus	2.17713e-07	8.2167e-08	6.73866e-07	1.13482e-07	2.03147e-07	5.75967e-08	1.03055e-06	6.15891e-07	4.56319e-07	3.85458e-07	5.64614e-07	2.17993e-07	2.52386e-07	5.76884e-07	5.5999e-07	4.20308e-07	0	1.21329e-07	7.08338e-07	1.12482e-07	5.42738e-07	4.78424e-07	8.52227e-07	2.78109e-07
Algoriphagus_halophilus	2.03084e-06	3.2892e-06	4.15337e-06	2.85381e-06	2.67417e-06	2.39095e-06	2.21213e-06	2.45905e-06	1.78756e-06	3.9082e-06	3.92067e-06	3.2583e-06	3.05252e-06	3.47301e-06	3.63138e-06	3.38834e-06	2.05819e-06	1.65763e-06	2.13064e-06	8.34194e-07	2.60282e-06	1.38153e-06	1.4282e-06	1.71116e-06
Algoriphagus_hitonicola	1.13633e-06	2.17129e-07	8.52693e-07	4.43916e-07	3.97434e-07	9.25743e-07	1.76177e-07	4.99413e-07	7.2382e-07	1.68359e-06	9.03424e-07	1.47235e-06	7.80039e-07	9.09277e-07	1.2427e-06	9.73956e-07	8.51014e-07	8.07666e-07	9.25804e-07	1.4154e-06	1.41324e-06	5.00314e-07	5.85103e-07	7.60379e-07
Algoriphagus_iocasae	1.45666e-06	5.05169e-07	2.49604e-06	6.4832e-07	2.10137e-06	1.54654e-06	1.7003e-06	7.70625e-07	2.28583e-06	1.4416e-06	2.30667e-06	1.23988e-06	2.48284e-06	1.89374e-06	1.83099e-06	1.80845e-06	9.72177e-07	2.34216e-06	8.99576e-07	1.0337e-06	1.92363e-06	9.77688e-07	1.1106e-06	3.56236e-06
Algoriphagus_kandeliae	7.79302e-07	6.88871e-07	5.44176e-07	4.98385e-07	5.50477e-07	1.13245e-06	7.65888e-07	3.31976e-07	4.98654e-07	1.24206e-06	5.92173e-07	5.70321e-07	4.06034e-07	5.79558e-07	8.94376e-07	1.3149e-06	1.07602e-06	4.6162e-07	1.69373e-06	1.20978e-06	3.02956e-06	1.16037e-07	3.74539e-07	1.54038e-06
Algoriphagus_lacus	2.81833e-06	4.89463e-06	7.682e-06	5.07745e-06	2.81165e-06	3.63656e-06	3.1862e-06	3.47946e-06	4.6761e-06	5.46048e-06	5.04839e-06	6.30406e-06	5.62873e-06	3.73425e-06	5.54205e-06	5.77336e-06	9.91799e-06	8.57903e-06	7.47308e-06	7.90966e-06	4.8746e-06	5.43101e-06	3.66225e-06	3.56821e-06
Algoriphagus_litoralis	8.187e-07	1.06732e-06	1.45773e-06	2.42407e-07	1.11104e-06	7.93408e-07	1.15134e-06	2.00071e-07	2.84965e-06	2.79505e-06	1.58982e-06	1.94458e-06	7.08138e-07	8.71985e-07	9.41986e-07	4.59879e-07	3.12746e-06	3.26261e-06	2.28413e-06	2.10951e-06	2.63594e-07	6.51082e-07	1.23241e-06	1.72912e-06
Algoriphagus_locisalis	1.17865e-06	2.85155e-06	1.83336e-06	1.2337e-06	8.87143e-07	2.26592e-06	1.58779e-06	1.42529e-06	3.58485e-06	7.50604e-07	2.41361e-06	1.86554e-06	2.33426e-06	1.8551e-06	1.1172e-06	9.99322e-07	1.21593e-06	1.5775e-06	3.18265e-06	3.19166e-06	9.86879e-07	1.2922e-06	1.10024e-06	4.13684e-07
Algoriphagus_machipongonensis	3.12227e-06	2.69346e-06	2.41598e-06	1.90116e-06	2.14362e-06	1.73078e-06	2.52844e-06	1.90543e-06	2.99804e-06	2.31266e-06	3.67169e-06	4.73651e-06	4.63173e-06	1.90113e-06	3.9941e-06	3.07575e-06	3.53323e-06	1.72141e-06	2.71684e-06	1.69065e-06	2.22996e-06	2.04799e-06	3.07945e-06	3.92323e-06
Algoriphagus_mannitolivorans	1.44849e-06	1.00132e-06	1.06927e-06	2.19562e-06	1.21386e-06	2.30116e-06	1.58711e-06	1.37817e-06	2.55345e-06	3.58817e-06	1.91259e-06	1.99577e-06	2.05128e-06	8.99248e-07	2.03946e-06	7.2579e-07	1.92546e-06	1.28495e-06	2.84149e-06	6.85605e-07	1.42134e-06	8.01004e-07	9.73525e-07	2.85567e-06
Algoriphagus_marincola	9.72208e-07	7.15912e-07	2.48822e-07	1.49364e-06	1.10044e-06	1.76376e-06	1.21944e-06	3.84038e-07	2.68368e-06	1.56237e-06	1.58535e-06	1.08205e-06	4.87249e-07	8.72071e-07	6.82558e-07	4.968e-07	1.01129e-06	3.20117e-07	1.62215e-06	0	2.66105e-06	1.06241e-06	1.6596e-06	4.5472e-07
Algoriphagus_marinus	2.30561e-06	1.93923e-06	1.82787e-06	2.11851e-06	3.67772e-06	2.93421e-06	5.96539e-07	1.97517e-06	2.84377e-06	3.09983e-06	2.42861e-06	4.02123e-06	2.33634e-06	2.97224e-06	1.62318e-06	1.67465e-06	2.25608e-06	3.46563e-06	2.21428e-06	3.04946e-06	1.7095e-06	1.45461e-06	2.19016e-06	1.53468e-06
Algoriphagus_ornithinivorans	1.62476e-06	8.45974e-07	4.49171e-08	1.0676e-06	8.17027e-07	3.37822e-07	1.06005e-06	4.60805e-07	7.82578e-07	8.06336e-07	3.58962e-07	1.77728e-06	4.10607e-07	4.95947e-07	8.47515e-07	4.12251e-07	1.34742e-06	1.54989e-06	1.27619e-06	1.59569e-06	1.67244e-06	1.18748e-06	9.92814e-07	1.92537e-06
Algoriphagus_ratkowskyi	2.03186e-06	2.97834e-06	3.67122e-06	2.66692e-06	2.30296e-06	2.54832e-06	1.92625e-06	1.93505e-06	5.45134e-06	3.60814e-06	2.91265e-06	3.25461e-06	3.6831e-06	4.53926e-06	3.13787e-06	4.56752e-06	3.44295e-06	2.49148e-06	5.05495e-06	2.4162e-06	5.14221e-06	3.96568e-06	4.05479e-06	5.04651e-06
Algoriphagus_resistens	6.24668e-07	1.84324e-06	2.83401e-06	3.54749e-06	2.47399e-06	1.88027e-06	3.49019e-06	1.7899e-06	2.29694e-06	1.95543e-06	2.17202e-06	1.85616e-06	1.9653e-06	2.04658e-06	2.66009e-06	1.82096e-06	1.00492e-06	9.88598e-07	1.01635e-06	1.94034e-06	1.53833e-06	1.17636e-06	1.17687e-06	2.20046e-06
Algoriphagus_sanaruensis	1.91059e-07	1.15124e-06	7.50482e-07	7.83237e-07	1.62034e-07	3.11128e-07	6.49784e-07	1.87567e-07	4.60228e-07	1.50761e-06	1.33185e-06	7.58355e-07	5.91078e-07	6.65654e-07	9.67004e-07	8.51328e-07	1.14932e-06	1.69797e-06	2.93365e-07	9.30311e-07	4.63942e-07	6.20512e-07	0	6.76162e-07
Algoriphagus_sp.	1.2035e-06	4.2356e-06	3.07111e-06	3.15438e-06	2.53974e-06	4.32702e-06	2.84426e-06	2.84189e-06	3.97583e-06	4.90548e-06	2.63936e-06	2.30784e-06	3.60787e-06	2.03634e-06	2.71971e-06	5.38844e-06	1.0413e-06	7.86851e-07	4.70606e-07	2.07095e-06	6.64222e-07	2.24677e-06	1.06169e-06	1.51482e-06
Algoriphagus_sp._32-45-6	5.46261e-07	8.18829e-07	1.59606e-07	7.46342e-07	9.10243e-07	8.51318e-07	6.50706e-07	4.32497e-07	1.36943e-06	9.68918e-07	9.89325e-07	6.88178e-07	1.43677e-06	1.0406e-06	5.01463e-07	1.17029e-06	7.8824e-07	1.50051e-06	1.22155e-06	8.15919e-07	1.83851e-07	1.21296e-06	6.3906e-07	7.32075e-07
Algoriphagus_sp._A40	4.34255e-06	5.52483e-06	7.13404e-06	5.34154e-06	5.30684e-06	6.0253e-06	6.60047e-06	4.61812e-06	4.0432e-06	7.14413e-06	5.36481e-06	5.27223e-06	4.84281e-06	3.66454e-06	6.51709e-06	5.05813e-06	7.86573e-06	5.34884e-06	7.92951e-06	5.04166e-06	4.59865e-06	3.41865e-06	4.21706e-06	3.68072e-06
Algoriphagus_sp._ARW1R1	1.02826e-07	2.92149e-07	6.30141e-07	3.5046e-07	3.27972e-07	2.14388e-07	9.39447e-08	4.91842e-07	3.20797e-07	8.76645e-07	2.84716e-07	9.68858e-08	2.91837e-07	3.39592e-07	1.00722e-06	0	4.93135e-07	1.03519e-07	5.9445e-07	5.81157e-07	2.42885e-07	7.65476e-07	3.48629e-07	0
Algoriphagus_sp._hg1	2.85393e-07	1.25546e-06	7.67183e-08	0	1.33116e-07	1.54343e-07	6.79071e-07	5.31695e-07	0	5.60335e-07	0	7.38028e-07	8.33465e-07	1.73704e-07	5.93434e-07	9.93144e-07	0	4.00426e-07	5.82624e-07	6.25376e-07	1.33343e-06	3.58058e-07	6.5191e-07	1.37151e-07
Algoriphagus_terrigena	3.64676e-06	5.19351e-06	7.16087e-06	5.1261e-06	5.87932e-06	5.03911e-06	5.47466e-06	4.90724e-06	6.10858e-06	4.90457e-06	3.2755e-06	4.53275e-06	6.29095e-06	1.96359e-06	5.62503e-06	4.58286e-06	4.19847e-06	4.32185e-06	3.99081e-06	2.9412e-06	7.3432e-06	3.5103e-06	3.64442e-06	4.58622e-06
Algoriphagus_vanfongensis	8.86245e-07	1.3094e-06	8.20933e-07	1.32775e-06	1.10956e-06	2.18864e-06	9.07998e-07	4.30213e-07	6.51866e-07	1.08859e-06	1.70151e-06	8.43565e-07	1.67408e-06	2.74867e-06	8.98917e-07	8.6022e-07	1.06647e-06	1.38114e-06	8.13555e-07	1.20272e-06	8.42602e-07	2.18213e-06	5.31135e-07	1.05534e-06
Algoriphagus_yeomjeoni	1.21254e-06	6.68784e-07	5.96203e-07	8.07782e-07	1.07257e-06	1.70945e-06	1.00503e-06	7.22093e-07	2.67293e-06	1.24123e-06	1.4651e-06	8.41775e-07	1.01582e-06	1.25081e-06	8.2683e-07	1.52002e-06	7.26096e-07	2.54932e-06	2.92035e-06	2.11195e-06	7.25407e-07	7.26495e-08	1.30061e-06	2.74301e-07
Algoriphagus_zhangzhouensis	4.79176e-07	1.30581e-06	8.82799e-07	2.20471e-06	6.0735e-07	5.99269e-07	2.69303e-06	4.37574e-07	1.31311e-06	1.32521e-06	8.14578e-07	1.63985e-06	1.32896e-06	3.5172e-07	5.71645e-07	8.20181e-07	2.26248e-06	1.60919e-06	1.70515e-06	6.17836e-07	6.89971e-07	5.63322e-07	7.55254e-07	1.1746e-06
Aliagarivorans_marinus	1.74458e-07	0	2.84398e-07	0	0	1.11854e-07	3.39018e-07	4.77104e-07	1.11582e-07	3.07393e-07	8.80609e-07	2.82982e-07	0	9.70262e-08	3.87597e-07	7.03554e-07	3.55592e-07	1.44661e-07	1.63689e-07	1.34113e-07	2.87766e-07	8.07836e-07	0	1.04354e-07
Aliagarivorans_taiwanensis	1.26669e-07	2.92149e-07	3.37492e-07	1.2576e-06	3.88557e-07	2.8585e-07	5.45624e-07	6.28169e-07	3.51104e-06	1.22164e-06	6.14162e-07	9.06142e-07	6.80537e-07	2.1241e-07	6.47435e-08	7.64131e-07	1.75485e-07	3.44352e-07	1.04373e-06	1.51606e-07	2.36e-07	0	5.06278e-07	6.03648e-07
Alicycliphilus_denitrificans	2.2195e-05	2.82692e-05	1.75331e-05	1.73864e-05	1.27365e-05	1.32709e-05	1.09622e-05	2.52656e-05	4.99199e-05	1.20409e-05	1.47143e-05	1.80759e-05	1.28339e-05	1.08054e-05	1.14747e-05	9.49927e-06	1.98578e-05	1.49998e-05	2.06442e-05	1.39586e-05	1.14844e-05	1.70804e-05	1.85435e-05	1.40134e-05
Alicycliphilus_sp.	5.33586e-06	3.90636e-06	5.42653e-06	5.3424e-06	3.19053e-06	3.3506e-06	4.41397e-06	2.77923e-06	6.92385e-06	3.18969e-06	3.45895e-06	2.95402e-06	2.92096e-06	3.57103e-06	3.35107e-06	2.31173e-06	3.48611e-06	3.77569e-06	5.41698e-06	3.7755e-06	4.75964e-06	2.24527e-06	4.30665e-06	5.01391e-06
Alicycliphilus_sp._69-12	2.56783e-06	2.48863e-06	1.76089e-06	1.58929e-06	9.84514e-07	2.5489e-06	2.54751e-06	1.90413e-06	6.98955e-06	1.71816e-06	1.91712e-06	1.42637e-06	1.96028e-06	1.24845e-06	2.19129e-06	2.69656e-06	1.7115e-06	2.86986e-06	3.56425e-06	2.69252e-06	1.23454e-06	1.82821e-06	2.53603e-06	4.02649e-06
Alicycliphilus_sp._B1	8.78737e-06	9.33483e-06	6.19881e-06	6.42603e-06	6.16326e-06	7.78706e-06	6.74559e-06	1.21487e-05	1.7456e-05	6.46722e-06	6.19553e-06	5.60944e-06	6.1532e-06	7.32247e-06	6.84045e-06	4.98382e-06	7.80134e-06	6.7808e-06	3.68626e-06	6.63417e-06	7.12353e-06	4.83773e-06	7.83415e-06	6.92136e-06
Alicyclobacillus_acidiphilus	2.78699e-06	4.24315e-06	1.56045e-06	4.81729e-06	3.9041e-06	3.82275e-06	4.03651e-06	4.70887e-06	3.28602e-06	4.69491e-06	3.41952e-06	2.63579e-06	4.2435e-06	3.59062e-06	4.9657e-06	4.59228e-06	1.5866e-06	2.9837e-06	2.79421e-06	2.19724e-06	3.12457e-06	2.26369e-06	1.61301e-06	2.35693e-06
Alicyclobacillus_acidocaldarius	2.67676e-06	4.08998e-06	9.92898e-07	2.76434e-06	3.08847e-06	3.15636e-06	2.06111e-06	3.62423e-06	2.00277e-06	2.1352e-06	3.11684e-06	2.05741e-06	3.01812e-06	2.42976e-06	3.5781e-06	4.16273e-06	1.91378e-06	2.01646e-06	2.81792e-06	5.80417e-07	7.16763e-07	9.82731e-07	1.63971e-06	1.3543e-06
Alicyclobacillus_acidoterrestris	3.77616e-06	3.42226e-06	2.01644e-06	4.06222e-06	3.69474e-06	3.41033e-06	3.85877e-06	4.15572e-06	2.56446e-06	1.90621e-06	2.44794e-06	1.89874e-06	4.5016e-06	3.48533e-06	2.90236e-06	4.15194e-06	3.55198e-06	1.70961e-06	2.64653e-06	1.6241e-06	2.33574e-06	1.0377e-06	1.69688e-06	2.65432e-06
Alicyclobacillus_contaminans	7.41193e-07	4.33631e-06	2.9206e-06	2.90625e-06	1.94197e-06	2.83e-06	2.35348e-06	2.47029e-06	1.73345e-06	2.76199e-06	1.6972e-06	2.28615e-06	2.78305e-06	2.41717e-06	3.62361e-06	2.91616e-06	8.42239e-07	1.0714e-06	5.11425e-07	1.7651e-06	3.99149e-07	7.54279e-07	8.77354e-07	1.01567e-06
Alicyclobacillus_ferrooxydans	2.01408e-06	3.69977e-06	2.4577e-06	3.01351e-06	3.47295e-06	3.39496e-06	3.45177e-06	2.33801e-06	2.08747e-06	1.81135e-06	2.26743e-06	7.59143e-07	1.8206e-06	3.02457e-06	2.95227e-06	2.36741e-06	1.68345e-06	9.33725e-07	3.77991e-07	2.31345e-07	1.26104e-06	1.11076e-06	9.34283e-07	1.77845e-06
Alicyclobacillus_herbarius	1.81734e-06	2.94739e-06	1.06848e-06	1.43084e-06	2.31636e-06	2.07785e-06	2.78098e-06	1.49397e-06	1.74311e-06	9.34751e-07	1.22561e-06	7.33904e-07	2.06771e-06	1.63524e-06	1.60156e-06	2.00647e-06	1.30239e-06	0	1.00322e-06	1.45289e-07	5.58657e-07	2.16419e-06	8.30066e-07	2.06166e-06
Alicyclobacillus_hesperidum	9.34304e-07	1.63775e-06	1.34043e-06	2.86808e-06	1.28433e-06	1.05108e-06	8.18014e-07	1.35029e-06	1.16693e-06	9.88565e-07	1.36231e-06	9.2824e-07	2.19864e-06	1.26736e-06	2.02949e-06	1.28923e-06	1.64849e-06	2.07293e-06	1.95849e-06	1.37944e-06	1.21919e-06	1.90964e-06	1.26e-06	2.97685e-06
Alicyclobacillus_kakegawensis	3.24484e-06	6.05643e-06	3.03169e-06	3.2203e-06	3.4064e-06	3.90575e-06	3.20007e-06	3.2419e-06	3.29083e-06	3.26705e-06	2.69307e-06	3.12528e-06	4.32147e-06	3.75445e-06	3.6367e-06	3.68421e-06	2.09854e-06	1.8273e-06	2.34171e-06	1.80905e-06	1.77134e-06	2.00761e-06	1.78463e-06	1.48509e-06
Alicyclobacillus_macrosporangiidus	8.11622e-06	1.08217e-05	9.50328e-06	1.18586e-05	1.21535e-05	1.14759e-05	1.20849e-05	1.40237e-05	1.0058e-05	9.66398e-06	6.84245e-06	6.48695e-06	1.30006e-05	1.00989e-05	1.19283e-05	9.60634e-06	4.81821e-06	5.51754e-06	4.53494e-06	3.91842e-06	3.78767e-06	4.59021e-06	4.04357e-06	4.921e-06
Alicyclobacillus_mali	6.49592e-07	1.04444e-06	2.4993e-07	1.0305e-06	1.15204e-06	3.0182e-07	7.38358e-07	1.15641e-07	4.30119e-08	3.15704e-07	3.99288e-07	8.01813e-08	1.05645e-06	5.32473e-07	2.26129e-07	6.43406e-07	1.39135e-07	4.00437e-07	0	2.29092e-07	3.57963e-07	0	2.25524e-07	5.51756e-07
Alicyclobacillus_montanus	7.68113e-07	9.49782e-07	8.75089e-07	1.54875e-06	1.24188e-06	1.26061e-06	1.62194e-06	1.7317e-06	1.38979e-06	7.36812e-07	1.44313e-06	1.57507e-06	1.19079e-06	6.6033e-07	1.47457e-06	1.37227e-06	9.45574e-08	1.01772e-06	1.8217e-07	8.17794e-07	1.72196e-07	1.98671e-06	4.11965e-07	5.42149e-07
Alicyclobacillus_pomorum	3.16763e-06	2.79342e-06	9.25985e-07	3.43936e-06	2.80907e-06	2.01242e-06	3.13121e-06	3.12247e-06	1.4142e-06	3.11486e-06	1.65713e-06	2.13626e-06	3.59654e-06	2.70954e-06	3.35025e-06	2.42054e-06	1.0563e-06	3.13978e-07	1.45809e-06	1.80347e-06	1.50308e-06	1.16387e-06	1.31682e-06	3.51224e-06
Alicyclobacillus_sacchari	2.99143e-07	1.15998e-06	1.84077e-07	9.8398e-07	1.79812e-06	1.29982e-06	8.34755e-07	8.08167e-07	5.57123e-07	6.36762e-07	7.31083e-07	7.302e-07	9.97224e-07	1.0949e-06	1.06521e-06	7.70488e-07	4.80959e-07	7.2157e-07	4.38567e-07	6.94493e-07	3.27648e-07	6.13169e-07	5.27199e-07	3.03589e-07
Alicyclobacillus_sendaiensis	5.19229e-07	3.85685e-07	6.66564e-07	7.46421e-07	8.99231e-07	8.97619e-07	2.39934e-06	1.4645e-06	1.07804e-06	1.40284e-06	1.19071e-06	7.61304e-07	7.33932e-07	1.35622e-06	1.44405e-06	1.57144e-06	2.09432e-06	1.51929e-06	1.48386e-06	6.10847e-07	1.19865e-06	5.51437e-07	1.68393e-06	1.2596e-06
Alicyclobacillus_shizuokensis	2.11191e-06	3.44291e-06	1.81636e-06	4.81728e-06	3.38975e-06	2.51828e-06	3.10885e-06	2.63446e-06	2.59075e-06	1.99397e-06	8.90697e-07	1.33483e-06	3.02433e-06	2.06169e-06	3.24253e-06	2.57446e-06	2.18864e-06	1.80178e-06	5.81436e-07	1.20594e-06	1.90167e-06	2.12143e-06	2.00547e-06	1.98762e-06
Alicyclobacillus_sp.	1.21309e-06	1.77623e-06	1.32029e-06	9.79669e-07	2.06638e-06	9.85107e-07	2.93417e-06	8.11674e-07	1.35112e-06	1.05647e-06	1.30738e-06	1.10155e-06	1.23254e-06	2.19612e-06	2.0766e-06	9.18299e-07	1.36122e-06	1.07702e-06	2.07972e-06	1.31512e-06	9.83395e-07	1.01423e-06	1.21298e-06	2.43507e-06
Alicyclobacillus_sp._RIFOXYA1_FULL_53_8	6.07888e-07	3.19107e-07	5.57199e-07	8.36185e-08	1.04088e-06	5.47328e-07	7.76018e-07	3.52029e-07	8.30951e-07	4.05145e-07	3.7683e-07	5.05445e-07	1.12464e-06	7.2937e-07	7.13066e-07	6.57259e-07	6.69229e-07	7.01849e-07	0	2.68403e-07	6.44932e-07	0	7.79685e-07	1.28774e-06
Alicyclobacillus_tengchongensis	6.57673e-07	9.20124e-07	6.18173e-07	1.01746e-06	1.06143e-06	1.74624e-06	1.51461e-06	1.18407e-06	8.29426e-07	5.54175e-07	6.41844e-07	1.12774e-06	1.73307e-06	6.27399e-07	1.06786e-06	1.37003e-06	1.33174e-06	1.74095e-06	0	1.62059e-06	9.19914e-07	3.80931e-07	4.9293e-07	7.82467e-07
Alicyclobacillus_vulcanalis	1.19169e-06	1.29205e-06	8.82517e-07	5.29829e-07	4.76664e-07	1.77847e-06	1.24829e-06	1.74647e-06	5.11631e-07	1.04695e-06	6.33895e-07	1.00977e-06	1.67132e-06	1.6968e-06	7.06465e-07	1.36897e-06	2.93489e-07	1.22648e-07	1.1889e-07	1.11066e-06	1.13139e-07	2.38413e-07	0	7.90048e-07
Alienimonas_californiensis	7.38873e-06	1.06507e-05	1.0107e-05	1.19742e-05	8.61556e-06	9.71383e-06	8.27132e-06	7.12062e-06	1.04989e-05	7.06025e-06	6.65125e-06	7.4029e-06	9.80501e-06	9.29573e-06	1.27956e-05	8.88117e-06	6.44293e-06	6.92633e-06	5.36065e-06	5.87463e-06	9.16631e-06	6.05718e-06	7.42722e-06	6.71667e-06
Alienimonas_chondri	4.2221e-06	3.31273e-06	5.2518e-06	6.12046e-06	5.1909e-06	4.65493e-06	5.93063e-06	6.39513e-06	4.95753e-06	3.90179e-06	4.74084e-06	5.09557e-06	7.02609e-06	5.178e-06	5.21139e-06	6.04853e-06	4.94399e-06	5.16538e-06	3.88842e-06	3.48776e-06	6.42297e-06	3.49154e-06	3.32121e-06	4.55924e-06
Aliiarcobacter_faecis	0	0	0	0	2.87553e-07	0	0	0	0	0	0	0	0	0	0	0	0	0	0	0	0	0	0	0
Aliicoccus_persicus	6.23081e-07	0	1.43147e-07	9.09251e-07	5.85935e-07	3.06548e-07	2.57766e-07	8.27019e-07	3.06247e-07	0	1.94145e-07	1.38362e-07	0	4.16374e-07	5.58946e-07	0	1.03029e-07	0	0	0	2.28279e-08	9.56301e-08	4.09532e-07	3.17373e-07
Aliidiomarina_haloalkalitolerans	8.36727e-07	3.53195e-07	4.21407e-07	4.35274e-07	2.24579e-07	0	4.46162e-07	3.26203e-07	1.00841e-06	7.58777e-07	1.16482e-06	3.31293e-07	3.94818e-07	0	5.39934e-07	4.61737e-07	0	0	4.18316e-07	0	2.31996e-07	0	9.78386e-07	0
Aliidiomarina_iranensis	6.92183e-07	3.24166e-07	0	0	3.44636e-07	5.21484e-07	4.74062e-07	2.79742e-07	3.88845e-07	3.625e-07	2.28382e-07	6.16955e-07	7.07484e-08	2.78545e-07	0	0	0	0	0	3.33856e-07	0	0	0	1.37151e-07
Aliidiomarina_maris	2.24107e-07	8.95778e-07	4.55956e-07	9.3992e-07	6.84654e-07	2.55286e-07	6.99768e-07	6.85477e-07	2.26445e-07	1.16325e-07	3.35805e-07	0	4.18155e-07	5.72349e-07	3.92379e-07	1.08893e-07	7.3505e-07	0	0	9.86871e-08	0	1.22863e-07	0	6.60604e-07
Aliidiomarina_minuta	0	2.81715e-07	2.22709e-07	1.59451e-07	5.75105e-07	3.62525e-07	1.5674e-07	0	6.31076e-08	4.32875e-07	2.47102e-07	2.9945e-07	9.83322e-07	4.06697e-08	2.40793e-07	1.19603e-07	8.31787e-07	6.75663e-08	1.35264e-07	1.25279e-07	5.36725e-07	8.23775e-07	5.44552e-07	2.49365e-07
Aliidiomarina_sanyensis	6.2629e-07	4.99581e-07	1.96217e-07	3.21762e-07	1.831e-07	3.0222e-07	9.37857e-07	4.62099e-07	5.85266e-07	0	6.83087e-07	1.58194e-06	1.28926e-06	7.84232e-07	5.58835e-07	5.67689e-07	2.88148e-07	3.88487e-07	7.77766e-07	7.09648e-07	4.74466e-07	6.45859e-07	5.16799e-07	1.10561e-06
Aliidiomarina_sedimenti	1.07903e-07	5.82388e-07	1.11287e-07	4.53762e-07	5.42367e-07	4.96613e-07	7.57566e-07	9.26255e-08	1.45494e-07	7.62139e-07	9.23777e-07	5.17509e-07	7.60938e-09	1.09079e-07	6.87288e-07	1.73114e-07	0	0	6.99662e-07	0	6.07788e-07	1.00659e-07	0	0
Aliidiomarina_shirensis	1.0163e-07	7.65828e-08	3.0228e-07	0	4.62504e-07	5.24521e-07	3.71305e-07	0	5.26975e-07	7.39696e-07	4.25095e-07	0	3.9796e-07	0	4.84018e-07	3.21874e-07	0	3.84667e-07	0	0	0	0	0	4.11452e-07
Aliidiomarina_soli	1.49858e-06	4.74305e-07	1.16496e-06	4.23261e-07	6.73232e-07	1.08628e-06	4.88831e-07	6.90564e-07	5.61524e-07	1.17961e-06	2.28382e-07	1.57738e-06	1.49638e-06	8.83806e-07	3.88853e-07	7.93569e-07	5.3756e-07	3.017e-07	9.60755e-07	1.28257e-06	6.70734e-07	1.09105e-06	5.06927e-07	7.26784e-07
Aliidiomarina_sp._F3105	1.28532e-07	1.0379e-07	3.28952e-07	6.79784e-07	5.31742e-07	9.52834e-08	2.88793e-07	3.76596e-07	4.32535e-07	3.98266e-07	2.89805e-07	7.83795e-08	1.1603e-07	0	2.64003e-07	5.56786e-07	9.18813e-08	7.41162e-07	1.35332e-06	3.10718e-07	5.01441e-07	3.68589e-07	0	9.05712e-08
Aliidiomarina_sp._IM1326	2.33071e-07	2.30164e-07	1.6946e-07	4.4073e-07	7.73342e-08	0	0	5.84175e-07	1.35522e-07	6.1151e-07	4.24136e-07	6.51343e-07	3.9796e-07	2.82993e-07	4.64947e-07	1.87072e-07	1.2567e-07	0	1.27301e-06	1.07177e-06	5.12409e-07	1.48841e-07	2.65887e-07	6.1939e-08
Aliidiomarina_taiwanensis	6.43688e-08	0	8.77204e-08	0	3.48698e-07	9.07995e-08	0	0	9.0578e-08	0	0	3.67146e-07	8.24011e-08	7.9904e-08	2.0545e-08	3.63246e-07	0	5.37313e-07	5.76252e-07	3.82713e-07	0	0	2.03662e-07	0
Aliifodinibius_halophilus	3.52361e-06	2.0684e-06	1.36806e-06	3.95962e-06	3.33447e-06	2.16611e-06	2.32027e-06	1.99095e-06	3.97305e-06	4.05918e-06	3.33226e-06	2.48691e-06	1.77654e-06	3.03666e-06	8.34563e-07	2.59888e-06	2.12812e-06	4.72731e-06	2.14141e-06	2.77242e-06	3.42342e-06	2.7612e-06	2.58352e-06	3.59004e-06
Aliifodinibius_roseus	1.45297e-05	1.01502e-05	1.09719e-05	1.146e-05	8.51635e-06	9.4422e-06	1.52515e-05	9.80439e-06	1.64008e-05	1.52099e-05	1.50526e-05	1.51115e-05	1.17727e-05	1.09799e-05	1.48403e-05	1.48852e-05	1.76503e-05	1.95561e-05	1.16368e-05	1.98395e-05	1.82975e-05	1.56839e-05	1.7099e-05	2.22057e-05
Aliifodinibius_saliphilus	1.87211e-06	2.17019e-06	8.90985e-07	2.87114e-06	2.30239e-06	2.77523e-06	2.33749e-06	1.16047e-06	2.06649e-06	2.40855e-06	8.72979e-07	1.39924e-06	1.90672e-06	1.42885e-06	1.6031e-06	1.02693e-06	3.58326e-06	2.17948e-06	1.73731e-06	2.50496e-06	2.56677e-06	1.89711e-06	2.72689e-06	3.49321e-06
Aliifodinibius_sediminis	7.05323e-06	6.80396e-06	7.10139e-06	8.87528e-06	7.43026e-06	8.2986e-06	7.60223e-06	3.86385e-06	7.90627e-06	6.46045e-06	5.24623e-06	9.07784e-06	7.0098e-06	8.0192e-06	8.59226e-06	6.02336e-06	6.39392e-06	7.87499e-06	6.26181e-06	7.87208e-06	5.78487e-06	5.97973e-06	5.13685e-06	7.14361e-06
Aliifodinibius_sp.	7.3071e-06	9.58204e-06	9.10478e-06	7.2569e-06	7.66391e-06	6.30084e-06	9.34722e-06	7.25162e-06	1.32063e-05	1.39771e-05	1.38245e-05	1.38707e-05	1.25994e-05	1.10558e-05	1.28991e-05	1.21449e-05	1.91714e-05	1.39935e-05	1.55572e-05	1.61025e-05	2.11996e-05	1.9742e-05	1.46737e-05	1.80161e-05
Aliifodinibius_sp._WN023	2.27958e-06	5.3764e-06	4.29329e-06	4.74772e-06	3.84627e-06	4.09906e-06	2.46536e-06	2.85469e-06	3.64311e-06	4.07471e-06	3.29593e-06	3.01495e-06	4.46119e-06	2.93311e-06	3.31621e-06	4.05848e-06	2.97897e-06	2.32675e-06	2.17145e-06	2.92136e-06	4.02488e-06	4.68061e-06	3.01848e-06	6.10855e-06
Aliiglaciecola_lipolytica	1.16363e-06	1.27888e-06	2.71249e-06	2.31988e-06	2.77637e-06	1.84934e-06	2.02368e-06	1.91914e-06	6.78051e-07	9.26781e-07	6.98714e-07	1.42145e-06	3.93859e-07	1.13669e-07	8.50392e-07	8.83525e-07	1.59436e-07	7.14976e-07	1.93513e-07	3.68569e-07	8.96984e-07	1.09299e-06	6.63375e-07	1.30149e-06
Aliiglaciecola_sp._M165	2.38731e-06	2.87264e-06	3.17136e-06	1.92751e-06	2.03471e-06	3.16924e-06	3.17041e-06	1.8595e-06	2.98685e-06	2.65359e-06	2.71976e-06	2.41558e-06	2.16367e-06	2.79786e-06	1.95369e-06	2.87914e-06	4.50015e-06	4.20804e-06	3.63504e-06	3.00251e-06	2.26755e-06	1.524e-06	1.59801e-06	3.80302e-06
Aliihoeflea_sp._2WW	3.16921e-06	1.91169e-06	3.08618e-06	2.78173e-06	2.97457e-06	2.30436e-06	2.49663e-06	2.63466e-06	2.15056e-06	1.35953e-06	1.94169e-06	2.00041e-06	2.87767e-06	1.29485e-06	2.46078e-06	2.20202e-06	2.73116e-06	4.89252e-06	2.41363e-06	9.73765e-07	2.98176e-06	1.94356e-06	2.19802e-06	1.77128e-06
Aliikangiella_marina	1.86669e-06	2.39151e-06	3.80303e-06	2.91059e-06	1.84091e-06	1.79855e-06	2.11435e-06	3.07842e-06	4.4622e-06	1.57181e-06	4.67929e-06	2.16452e-06	2.61695e-06	2.40864e-06	3.02415e-06	3.34758e-06	4.03648e-06	2.7847e-06	4.27669e-06	2.13189e-06	4.15831e-06	3.67456e-06	2.71724e-06	2.03964e-06
Aliikangiella_sp._M105	5.4699e-06	7.37487e-06	5.88725e-06	4.48039e-06	4.1576e-06	3.61282e-06	5.97499e-06	8.30337e-06	1.03191e-05	8.51343e-06	1.08275e-05	1.18407e-05	5.95586e-06	5.28902e-06	7.50245e-06	5.01044e-06	8.83415e-06	7.45713e-06	6.87365e-06	5.6049e-06	6.9561e-06	6.89042e-06	5.00007e-06	5.12839e-06
Aliiroseovarius_crassostreae	0	1.73363e-07	3.97666e-07	3.49176e-07	7.47847e-08	8.48127e-08	0	1.64894e-07	1.15695e-07	1.40428e-07	0	2.79003e-07	4.2268e-07	5.77585e-07	7.89729e-08	1.87994e-07	0	1.12836e-07	3.38836e-07	1.39478e-07	0	0	0	1.05501e-07
Aliiroseovarius_halocynthiae	1.17587e-06	1.18436e-06	1.58704e-06	1.72443e-06	8.39842e-07	1.24482e-06	9.00421e-07	7.00571e-07	1.82768e-06	1.81149e-06	2.21688e-06	1.45955e-06	1.86225e-06	1.27418e-06	1.46288e-06	1.52827e-06	1.67727e-06	5.0374e-07	2.01499e-06	7.54114e-07	1.07001e-06	9.23868e-07	1.10825e-06	1.92483e-06
Aliiroseovarius_marinus	0	0	9.94165e-08	9.34559e-08	2.40191e-07	0	9.17343e-08	2.88338e-07	0	2.95965e-07	0	0	4.98349e-07	0	1.86789e-07	0	9.09012e-07	0	0	0	1.03821e-07	4.06267e-07	0	1.12948e-07
Aliiroseovarius_pelagivivens	0	9.86004e-08	0	0	0	2.89423e-07	0	1.87567e-07	0	7.89367e-07	0	0	0	0	6.7437e-07	0	0	7.45798e-07	0	0	2.20621e-07	0	0	0
Aliiroseovarius_sediminilitoris	1.22059e-06	8.81733e-07	2.68404e-06	1.92868e-06	1.58858e-06	2.70153e-06	2.19496e-06	2.31441e-06	3.34967e-07	8.39628e-07	2.9526e-07	7.3501e-07	8.56282e-07	1.53423e-06	1.04161e-06	5.02801e-07	9.33844e-07	2.65905e-06	1.5739e-06	0	1.8133e-06	5.39247e-07	5.48471e-07	3.43706e-07
Aliiroseovarius_sp.	2.36798e-06	1.02035e-06	2.872e-06	1.98994e-06	3.20801e-06	3.48895e-06	2.97678e-06	2.60304e-06	3.20178e-06	2.42835e-06	4.00075e-06	2.85767e-06	1.94938e-06	1.4319e-06	2.33985e-06	2.69932e-06	2.60584e-06	3.52829e-06	2.21139e-06	2.13554e-06	1.61823e-06	2.76917e-06	2.70573e-06	4.13527e-06
Aliiroseovarius_sp._PrR006	0	0	0	3.55691e-07	0	0	0	0	0	0	0	0	0	0	0	0	0	0	0	0	0	0	0	0
Aliiroseovarius_sp._xm-a-151	0	0	0	0	0	0	0	0	0	0	8.19196e-08	3.79118e-07	1.52263e-07	0	3.6854e-07	3.69408e-07	0	0	0	0	0	0	0	0
Aliiroseovarius_sp._xm-g-7	0	0	2.69502e-07	0	0	0	9.39447e-08	0	1.58435e-07	9.39006e-08	0	8.40455e-08	1.36453e-07	0	1.73169e-07	0	0	0	0	0	0	0	0	0
Aliiroseovarius_sp._xm-m-339-2	0	1.11099e-07	6.30104e-07	1.11884e-07	0	0	0	3.17014e-07	0	1.09771e-07	2.07995e-07	0	0	0	0	1.02758e-07	2.63227e-07	1.52481e-07	3.11707e-07	8.72409e-07	1.19254e-07	0	0	0
Aliiroseovarius_sp._xm-v-201	0	0	1.93668e-07	0	0	0	0	0	0	0	0	0	2.72887e-07	1.76411e-07	0	0	0	0	1.46682e-07	0	0	0	0	0
Aliiroseovarius_sp._xm-v-204	0	0	0	0	0	0	0	0	0	0	0	0	0	0	0	0	3.69851e-07	0	0	0	0	0	0	0
Aliishimia_ponticola	1.23974e-07	2.6867e-07	4.799e-07	6.07259e-07	4.31908e-07	4.34794e-07	2.85357e-07	6.85685e-07	1.06384e-06	5.73058e-07	1.54869e-06	7.13101e-07	1.91378e-07	9.08357e-07	1.25509e-06	9.33113e-07	1.17342e-07	6.32089e-07	0	3.44863e-07	5.9635e-07	2.78676e-07	2.21623e-06	7.59014e-07
Aliivibrio_finisterrensis	0	7.63319e-08	5.73557e-08	2.44423e-07	1.04699e-07	1.18738e-07	0	5.77128e-08	0	5.99519e-08	0	5.36598e-08	2.1551e-07	0	0	8.31361e-07	7.49186e-08	0	0	8.04679e-08	0	1.47621e-07	0	0
Aliivibrio_fischeri	1.90937e-06	7.20753e-07	8.14707e-07	1.09916e-06	6.87877e-07	1.42587e-06	5.86909e-07	1.15344e-06	1.47225e-06	1.26759e-06	1.25132e-06	1.28519e-06	1.13797e-06	1.71005e-07	7.1822e-07	1.95838e-06	0	1.4283e-07	7.13373e-07	2.85128e-07	7.25691e-07	4.62854e-07	4.08608e-07	4.43181e-07
Aliivibrio_logei	2.74703e-07	8.43174e-07	1.62148e-06	1.80481e-06	8.85729e-07	7.96311e-07	1.159e-06	1.10169e-06	6.70757e-07	1.70463e-07	1.56325e-07	4.8298e-07	5.9864e-07	1.161e-07	3.6854e-07	9.06602e-07	0	0	0	0	7.54259e-08	0	2.53516e-07	0
Aliivibrio_sp._1S175	0	0	0	0	8.29928e-08	2.07427e-07	2.85271e-07	6.46413e-07	0	0	0	0	2.72887e-07	0	4.7157e-07	0	5.41079e-07	6.26865e-07	1.56869e-07	1.45289e-07	0	0	1.20217e-07	2.66682e-07
Aliivibrio_sp._EL58	0	0	4.34344e-07	0	0	0	0	1.45683e-07	4.73321e-08	0	7.31709e-08	0	6.80009e-08	0	0	0	1.4341e-06	1.58924e-07	0	0	2.24575e-07	0	0	0
Aliivibrio_sp._SR45-2	0	0	0	4.78539e-08	0	0	0	0	1.39141e-07	0	0	2.94159e-07	4.21933e-08	0	4.32924e-08	0	0	0	0	0	0	0	1.04285e-07	1.73504e-07
Aliivibrio_wodanis	6.68387e-07	4.45651e-08	0	1.39448e-07	3.84486e-07	4.36043e-08	1.76213e-07	3.05799e-07	4.19053e-07	0	0	0	0	3.8372e-08	0	1.45048e-07	0	1.34328e-07	4.56345e-07	0	0	1.98921e-07	1.46705e-07	4.2631e-07
Alishewanella_aestuarii	3.60355e-07	0	7.93216e-08	0	9.1965e-08	9.76957e-08	0	2.8259e-07	3.92878e-07	8.29122e-08	1.77382e-06	3.17551e-07	3.61234e-07	7.22536e-08	8.1422e-07	4.29165e-07	2.07222e-07	0	0	2.16116e-07	0	2.66639e-07	1.16298e-06	1.02133e-07
Alishewanella_agri	8.48561e-08	0	8.28471e-08	4.3018e-07	4.05975e-07	3.32197e-07	7.5703e-08	7.28414e-08	1.49498e-07	0	3.24391e-07	3.77542e-07	2.96379e-07	7.54648e-08	6.97722e-08	4.95832e-07	9.45574e-08	2.19098e-07	6.45403e-07	1.08465e-06	2.57034e-07	8.98354e-08	2.52105e-07	0
Alishewanella_jeotgali	2.57684e-07	5.9325e-07	6.51001e-07	3.44157e-07	3.10431e-07	2.0795e-07	1.90181e-07	2.73555e-07	4.16972e-07	5.48755e-07	3.555e-07	2.17241e-07	2.20156e-07	5.25463e-07	1.88859e-07	1.06673e-06	2.99411e-07	1.02638e-06	1.59078e-07	2.74907e-07	5.09803e-07	2.35343e-07	7.57195e-07	6.76095e-08
Alishewanella_sp._34-51-39	0	1.94766e-07	9.20523e-08	9.80711e-08	0	1.11854e-07	0	0	2.70794e-07	1.92438e-07	1.10837e-06	4.98332e-07	8.64703e-08	5.22449e-08	8.87226e-08	0	0	4.3962e-07	1.03329e-06	0	7.94202e-07	0	0	4.22386e-07
Alishewanella_sp._HH-ZS	5.57467e-07	0	0	1.89137e-07	2.72594e-07	3.64859e-07	9.28263e-08	5.49303e-07	2.9612e-07	4.85325e-07	1.08234e-06	0	1.79592e-07	8.08552e-08	4.51762e-07	9.3536e-08	4.93135e-07	2.87491e-07	2.87771e-07	8.97079e-07	6.51724e-07	1.05756e-07	1.03043e-07	3.54306e-07
Alishewanella_sp._WH16-1	4.46072e-07	9.54438e-07	8.89435e-07	4.26166e-07	7.07186e-07	8.00473e-07	2.12415e-07	1.51613e-07	3.91432e-07	9.11269e-07	2.5122e-07	3.84303e-07	2.82746e-07	1.81617e-07	7.48756e-07	7.6798e-08	1.42253e-06	8.07983e-07	1.14447e-06	3.21582e-07	3.93044e-07	4.07429e-07	1.73112e-07	3.2563e-07
Alistipes_communis	1.09252e-07	9.28003e-08	8.1069e-07	4.70006e-07	8.50676e-08	1.81599e-07	1.89202e-07	1.76533e-07	2.88717e-07	8.13156e-07	6.44539e-07	2.38844e-07	3.77821e-07	9.35349e-07	5.30831e-07	6.98695e-07	0	2.12898e-07	0	0	3.52993e-07	0	1.10969e-07	0
Alistipes_dispar	2.82421e-07	7.65828e-08	1.05878e-06	2.31372e-07	2.87553e-07	7.49316e-08	5.17175e-07	1.02077e-07	3.1425e-07	8.52011e-08	1.94448e-07	3.40282e-07	2.38832e-07	0	2.93328e-07	0	0	2.33169e-07	0	0	1.80098e-07	1.36119e-07	0	1.47084e-07
Alistipes_finegoldii	0	0	9.20523e-08	0	4.23238e-07	8.97437e-08	3.87464e-07	1.85251e-07	5.03934e-07	0	5.64369e-07	8.11137e-08	3.52799e-07	8.38498e-08	3.26836e-07	7.73989e-07	0	0	0	1.12482e-07	0	0	2.79213e-07	3.64578e-07
Alistipes_finegoldii_CAG:68	3.75763e-07	4.67054e-07	3.46802e-07	0	0	3.24865e-07	5.12988e-07	9.87193e-08	3.54565e-07	1.53824e-07	1.98332e-07	4.58933e-08	6.31115e-07	0	0	9.59975e-08	1.23284e-07	1.4283e-07	0	0	0	0	0	0
Alistipes_ihumii	0	1.31694e-06	3.77111e-07	2.26964e-07	9.86356e-07	4.21299e-07	5.63781e-07	8.06171e-07	1.15487e-07	2.0695e-07	0	4.86743e-07	2.86786e-07	2.4281e-07	0	1.29422e-06	0	0	1.07936e-06	5.23042e-07	0	0	0	9.05712e-08
Alistipes_indistinctus	7.02726e-07	5.78781e-07	1.62386e-07	4.10884e-07	8.58127e-07	7.92954e-07	1.19089e-06	2.75585e-07	2.18289e-07	3.57054e-07	7.84201e-07	3.35496e-07	5.22535e-07	7.54648e-08	1.85859e-07	6.80745e-07	0	2.65496e-07	4.55578e-07	9.14224e-07	0	1.8566e-07	9.61735e-08	0
Alistipes_megaguti	0	0	0	0	0	0	0	0	1.38723e-07	1.40428e-07	0	1.2569e-07	1.893e-07	0	0	0	0	2.03308e-07	1.01753e-07	0	5.26707e-07	1.50535e-07	7.79785e-08	3.45966e-07
[truncated: 34,783 more rows]
