# Supplementary material
Source: MDPI journal article supplement (https://www.mdpi.com/2073-4395/14/3/635)
Supplement: s1 [file s1 › Table S10.xlsx]

## Sheet: Sheet1
Table S10.	Level 3 functional pathways annotated by KEGG database in 24 samples
level3 functional pathways	AIP1	AIP2	AIP3	AIP4	AMP1	AMP2	AMP3	AMP4	BIP1	BIP2	BIP3	BIP4	BMP1	BMP2	BMP3	BMP4	CIP1	CIP2	CIP3	CIP4	CMP1	CMP2	CMP3	CMP4
ABC transporters	106.582	114.924	120.993	113.146	126.979	111.674	111.328	120.752	120.52	110.266	122.986	124.322	124.895	118.091	122.309	120.577	92.1778	81.2255	79.3392	81.661	101.015	89.9295	97.8914	97.7951
Aminoacyl-tRNA biosynthesis	80.757	85.0799	89.7481	88.1172	98.973	89.3571	86.1769	90.3875	88.1794	85.4846	91.2423	95.4228	96.9443	91.081	95.8957	94.6498	72.1386	62.0865	62.9432	61.1349	78.4933	67.2067	70.7296	72.2231
Two-component system	80.2781	87.9459	91.4555	85.6175	97.9353	85.5228	86.016	88.4981	83.7677	78.6219	85.891	88.3838	90.6393	85.2108	89.4699	87.8425	67.1447	57.1348	57.1159	56.0333	73.4537	61.9536	65.2313	66.4846
Oxidative phosphorylation	64.1672	68.3701	72.873	68.8978	82.3983	75.2678	71.5662	74.3632	67.9167	67.1957	72.1287	73.2247	76.5992	70.1498	73.9209	71.5303	55.9507	47.7803	48.2545	49.9136	62.1764	54.2219	57.3628	58.2807
Ribosome	59.8036	59.9946	64.8099	61.8981	71.4701	66.5896	64.4222	65.8495	64.4425	62.9587	64.5219	67.3597	68.6671	64.8871	68.7351	65.9561	56.5199	48.5131	48.8706	48.7333	56.8169	51.8503	52.7066	53.4987
Quorum sensing	59.5292	61.6701	63.7518	61.1268	63.3879	56.7177	54.9568	62.5054	66.8203	60.2023	69.9822	70.2888	66.4289	60.8131	65.689	64.3264	50.2469	44.9873	43.749	45.9003	57.2303	48.9243	52.9816	51.2726
Purine metabolism	42.3671	44.8155	47.135	44.086	52.6538	44.8264	44.0561	48.0119	46.4849	43.9561	47.5212	47.7884	49.0922	46.276	49.5641	46.836	36.338	30.8934	31.1541	30.6225	40.4032	35.1499	36.3974	36.87
Porphyrin and chlorophyll metabolism	33.372	36.8659	37.8523	36.5484	42.905	38.9805	37.5685	40.5156	37.7902	36.8251	39.9912	39.8857	39.6005	39.0573	40.6672	39.6118	29.2319	25.3839	25.652	25.2756	33.9643	29.0028	29.9726	30.1899
RNA polymerase	31.9836	30.7488	34.1934	33.778	36.4069	34.7136	32.2335	34.0912	33.8571	32.9646	34.3562	36.1162	35.8838	34.0615	35.2784	33.9076	31.896	28.2198	28.6467	29.5659	31.2164	27.3148	27.5224	28.7595
RNA degradation	28.3238	29.1313	31.3144	31.1781	36.354	32.9389	32.3515	32.8031	31.3121	30.4647	31.9812	33.1969	35.1345	33.3242	34.7423	33.1095	26.1618	23.1248	23.5906	22.458	27.055	24.5883	25.3659	26.2845
Nucleotide excision repair	29.0388	30.0394	31.9815	30.4209	35.8169	33.3033	31.2953	32.788	31.1237	29.6584	31.8183	31.9949	34.21	30.8849	33.3777	33.2331	26.9806	22.8331	22.1303	23.4232	27.8389	24.3092	25.4877	25.548
Cell cycle - Caulobacter	28.6312	27.949	32.1056	30.7064	34.8703	31.4801	30.6357	31.4673	30.087	29.225	31.1109	30.5247	32.9681	30.5854	31.7394	31.7225	26.0922	22.665	23.3455	22.649	27.5263	23.0108	24.3792	24.7018
Amino sugar and nucleotide sugar metabolism	27.5954	31.3516	31.6537	31.5198	35.7255	32.0764	31.6977	33.7047	29.0092	30.193	30.0654	31.941	34.7153	33.2507	34.2524	32.87	22.8224	19.203	18.9497	19.8905	25.1831	22.2037	24.5972	23.8914
Starch and sucrose metabolism	26.6529	31.6765	30.9127	29.6743	34.3922	30.5135	30.9836	31.1334	29.7803	29.038	30.2768	31.3067	33.8297	32.1311	32.4963	33.3064	23.2676	19.247	18.7949	20.1273	26.6702	22.8687	25.3571	22.7133
Arginine and proline metabolism	25.5954	27.5614	29.0928	26.9561	30.8066	27.465	26.7647	27.5145	26.8159	25.6079	29.9482	28.8091	29.7636	26.9509	28.2334	28.4499	22.4023	18.9281	18.3177	19.308	25.3125	21.6802	23.1345	23.1407
Nicotinate and nicotinamide metabolism	24.3332	26.6681	26.7124	26.494	30.1526	25.697	25.5325	27.3782	26.4293	24.8531	26.3717	28.1397	28.2236	26.6017	28.2104	27.7662	21.1579	17.8105	17.893	17.185	22.1262	20.1152	20.9098	20.3316
Pyrimidine metabolism	23.2785	25.5748	26.2894	24.8232	28.6937	25.3532	25.2249	26.4273	25.3601	23.9763	26.096	26.7857	27.3551	26.2683	27.4678	27.945	21.5308	18.2527	17.3684	17.7866	22.7692	19.8909	20.9395	21.5393
Homologous recombination	19.3063	22.1324	22.643	22.23	25.5595	22.2915	22.4858	22.831	22.1021	22.4024	21.7647	22.7277	24.7801	23.3502	24.3539	23.0301	17.7284	14.9185	14.9214	15.4113	19.3579	16.7532	18.6659	18.1463
Lipopolysaccharide biosynthesis	21.0678	22.986	24.4773	22.7851	25.9796	21.6669	22.1776	22.8889	22.1112	20.6686	22.1967	23.3721	24.717	23.3306	24.4795	24.077	16.521	13.7335	13.2755	13.1031	19.6996	17.1372	18.5001	18.1372
Pentose phosphate pathway	20.0698	20.8622	22.2832	21.2503	24.8763	21.5098	21.3447	21.6536	20.0503	20.1825	22.9079	23.3323	22.9395	22.161	23.3205	22.2268	16.3527	14.9249	14.1907	13.8599	19.1567	16.719	16.6706	16.7946
Cysteine and methionine metabolism	19.386	19.5129	21.8892	20.8849	22.3153	20.3161	20.8969	20.7567	21.0466	20.1962	21.3369	22.6825	22.7879	20.7868	22.1935	22.3963	17.3133	15.0805	15.6739	16.0708	18.9953	16.735	17.7064	17.3612
Histidine metabolism	18.1724	18.9147	20.7127	19.1047	21.2344	19.0429	18.4506	19.724	18.7701	18.4716	20.0891	20.3735	20.0689	19.7002	20.6925	19.0905	16.4238	13.6067	14.2003	14.0034	17.8846	15.3453	15.9159	16.5811
Folate biosynthesis	17.3619	18.9027	20.1722	18.7601	22.4549	19.3605	20.4059	20.3911	18.8847	17.7858	20.3553	20.4279	20.7226	20.1793	21.5063	21.4712	15.6431	12.4524	12.4777	12.7614	17.1924	14.7711	15.3769	14.9943
Phenylalanine, tyrosine and tryptophan biosynthesis	17.9442	19.6004	19.48	19.0864	22.1427	20.259	20.3317	20.0141	19.5405	18.5021	20.4935	20.5359	21.9897	20.4764	20.999	20.5577	14.0504	12.1899	11.8734	12.6649	16.2949	14.8238	14.9084	15.0305
Glycerophospholipid metabolism	17.0177	19.4401	20.0068	19.1696	21.8203	19.2148	18.7296	20.0491	18.982	17.2138	19.5212	19.5376	20.003	19.1131	20.0628	19.4877	14.6132	12.4012	12.2467	12.6535	16.8156	14.3309	15.8725	15.1092
Base excision repair	16.938	18.6294	19.3699	18.5652	22.5535	19.989	19.731	19.5422	17.9621	17.9679	19.0775	19.82	20.6821	19.2078	20.1842	19.5169	13.8387	12.1554	11.0094	12.0676	16.5684	14.7049	15.5992	15.1368
Ubiquinone and other terpenoid-quinone biosynthesis	16.4073	17.472	17.431	17.7985	20.5964	18.4009	17.9977	17.7773	17.6465	16.3549	18.3244	18.8098	19.2039	18.0898	19.5475	18.8964	13.3924	11.1942	11.3845	11.3604	15.5584	13.3786	14.0536	13.7402
Sulfur metabolism	15.8998	16.4012	18.0815	17.3262	19.3596	17.0667	16.8136	17.6859	17.7827	16.1354	18.2058	18.1762	18.7625	17.5401	18.0896	17.5928	14.632	12.5957	11.9883	12.3515	14.8973	13.3092	14.3183	13.7435
Terpenoid backbone biosynthesis	15.6608	16.9634	17.5328	16.8758	19.3246	17.7224	17.7415	18.7597	16.9906	16.5468	17.4789	17.7782	18.4246	17.5953	19.0831	18.2272	13.3312	11.7058	11.1587	11.5587	14.559	12.536	13.8053	13.2276
Nitrogen metabolism	14.9963	16.5824	18.0173	16.3837	17.8019	17.095	16.1899	17.1194	16.747	14.977	16.8756	17.3987	18.0213	16.7316	17.5491	17.2415	14.1346	11.8998	10.652	12.0177	14.2078	12.701	13.6075	13.9263
