# Supplementary material
Source: MDPI journal article supplement (https://www.mdpi.com/2073-4395/14/3/635)
Supplement: s1 [file s1 › Table S11.xlsx]

## Sheet: Sheet1
Table S11.	RDA analysis of environmental factors on microbial community structure
Environmental factor	RDA1	RDA2	r2	Pr（>r）	Significant difference
TN	0.97718	-0.2124	0.3329	0.012	*
TP	0.67651	0.73643	0.337	0.012	*
TK	-0.88306	0.46927	0.2389	0.063	.
AN	0.90086	0.43411	0.4751	0.002	**
AP	-0.93607	0.3518	0.2871	0.031	*
AK	0.21264	0.97713	0.3759	0.012	*
SOM	0.96563	0.25991	0.4026	0.012	**
pH	-0.97428	0.22533	0.4045	0.007	**
