# Supplementary material
Source: MDPI journal article supplement (https://www.mdpi.com/2073-4395/14/3/635)
Supplement: s1 [file s1 › Table S12.xlsx]

## Sheet: Sheet1
Table S12.	Spearman correlation analysis between KEGG level 2 functional pathway and environmental factors
level2 functional pathways	TN	TP	TK	AN	AP	AK	OM	pH
Amino acid metabolism	1	1	0.0198016	0.43795	0.0293861	1	1	1
Carbohydrate metabolism	1	1	0.000947571	0.027088	0.166065	1	1	1
Translation	1	1	0.00471137	0.398966	0.0202033	1	1	1
Metabolism of cofactors and vitamins	1	1	0.00147008	0.127255	0.0619285	1	1	1
Membrane transport	1	1	0.0226486	0.714925	0.0254482	1	1	1
Energy metabolism	1	1	0.0290837	0.0928309	0.0052463	1	1	1
Replication and repair	1	1	0.00193033	0.072414	0.074044	1	1	1
Signal transduction	1	1	0.00678753	0.0895975	0.178199	1	1	1
Cellular community - prokaryotes	1	1	0.221082	1	0.00812055	1	1	1
Nucleotide metabolism	1	1	0.00310013	0.538936	0.0768328	1	1	1
Folding, sorting and degradation	1	1	0.00310013	0.113163	0.0251567	1	1	1
Glycan biosynthesis and metabolism	1	1	0.000292365	0.0290585	0.343429	1	1	1
Metabolism of terpenoids and polyketides	1	1	0.00651845	0.023201	0.0851946	1	1	1
Transcription	1	1	0.149761	1	0.000880427	1	1	1
Lipid metabolism	1	1	0.0152135	0.282529	0.0292357	1	1	1
Cell growth and death	1	1	0.0155387	0.0369408	0.0299156	1	0.714925	1
Xenobiotics biodegradation and metabolism	1	1	0.0113135	1	0.189327	0.598071	1	1
Metabolism of other amino acids	1	1	0.00395091	0.00812055	0.025303	1	0.714925	1
Environmental adaptation	0.16308	1	1	0.096149	1	1	0.178371	0.0149267
Cell motility	1	1	0.000268557	0.0114619	0.214766	1	0.365088	1
