# Supplementary material
Source: MDPI journal article supplement (https://www.mdpi.com/2073-4395/14/3/635)
Supplement: s1 [file s1 › Table S13.xlsx]

## Sheet: Sheet1
Table S13.	KEGG database annotation genes related to nitrogen cycling
Gene	Type
nifD	Nitrogen fixation
nifH	Nitrogen fixation
nifK	Nitrogen fixation
pmoA-amoA	Nitrification
pmoB-amoB	Nitrification
pmoC-amoC	Nitrification
hao	Nitrification
nirK	Denitrification
nirS	Denitrification
norB	Denitrification
norC	Denitrification
nosZ	Denitrification
napA	Dissimilatory nitrogen reduction
napB	Dissimilatory nitrogen reduction
narG	Dissimilatory nitrogen reduction
narH	Dissimilatory nitrogen reduction
narI	Dissimilatory nitrogen reduction
nirB	Dissimilatory nitrogen reduction
nirD	Dissimilatory nitrogen reduction
nrfA	Dissimilatory nitrogen reduction
nrfH	Dissimilatory nitrogen reduction
nasA	Assimilatory nitrogen reduction
nasB	Assimilatory nitrogen reduction
narB	Assimilatory nitrogen reduction
nirA	Assimilatory nitrogen reduction
NIT-6	Assimilatory nitrogen reduction
