# Supplementary material
Source: MDPI journal article supplement (https://www.mdpi.com/2073-4395/14/3/635)
Supplement: s1 [file s1 › Table S14.xlsx]

## Sheet: Sheet1
Table S14.	The relative abundance of nitrogen cycling related genes in 24 samples
Gene	AIP	AMP	BIP	BMP	CIP	CMP
nifD	0.00347222	0.00231481	0.0049742	0.00578704	0.00347222	0.00578704
nifH	0.0120667	0.00733864	0.00353333	0.00456061	0.000757576	0.00227273
nifK	0.014116	0.0112127	0.011164	0.00870865	0.00170622	0.0078248
pmoA-amoA	0.0277788	0.0176542	0.0469296	0.0412006	0.0273758	0.028401
pmoB-amoB	0.0248542	0.0194098	0.0240742	0.0191585	0.0616019	0.0685939
pmoC-amoC	0.0989892	0.0727317	0.177729	0.168559	0.178436	0.224935
hao	0.244016	0.260624	0.121296	0.171816	0.042589	0.116135
nirK	1.72686	1.79312	1.82133	1.90791	1.10634	1.41474
nirS	0.185423	0.164987	0.156308	0.17069	0.133424	0.125318
norB	1.99828	2.19924	1.70463	1.90519	0.917639	1.17944
norC	0.0548302	0.054829	0.0841702	0.0697735	0.0446687	0.0640436
nosZ	1.34705	1.2184	1.31198	1.58255	0.949668	1.22148
napA	0.497705	0.438936	0.493827	0.440265	0.522897	0.498795
napB	0.110573	0.0691363	0.0978094	0.106688	0.0605086	0.082326
narG	2.20956	2.64955	2.16289	2.43118	1.49841	1.73091
narH	1.09165	1.18429	1.17366	1.17613	0.706519	1.03389
narI	0.231584	0.292051	0.21828	0.268504	0.0869479	0.119704
nirB	1.43519	1.48722	1.586	1.61202	1.57906	1.2781
nirD	0.278235	0.243314	0.300362	0.253187	0.195646	0.215778
nrfA	0.454731	0.369394	0.51415	0.48876	0.463184	0.494608
nrfH	0.192163	0.151791	0.186697	0.184716	0.108163	0.157929
nasA	2.03434	2.01882	2.18976	2.17819	1.58933	1.89922
nasB	0.00684701	0.0494206	0.0474505	0.0428959	0.0240337	0.0152899
narB	0.276643	0.198853	0.344402	0.359187	0.202092	0.211567
nirA	0.358298	0.346343	0.278263	0.349784	0.198345	0.20869
NIT-6	0.0122219	0.00603865	0.00845889	0.00598419	0.00189394	0.0198353
